# Supplementary material for: MBNL and CELF proteins regulate alternative splicing of the skeletal muscle chloride channel CLCN1
Source: PubMed Central journal article supplement — Nucleic Acids Res. 2009 Aug 31;37(19):6477–90. doi: 10.1093/nar/gkp681 (PMC2770659; doi:10.1093/nar/gkp681), 2009-08-31

**Supplementary table S1 Primers used for minigene analysis**

| <b>primer</b>         | <b>sequence</b>                         |
|-----------------------|-----------------------------------------|
| Clcn1-Fw              | GGATCCGGTCCCTTTGTTACATCGCCAGC           |
| Clcn1-Rv              | GTCGACCTCCAAGTGGTGTCCAAAACAGC           |
| Clcn1-40Fw            | TCAGCAAGTTTATGTCCATG                    |
| CLC-1-Fw              | GGATCCGGCCCCTTCGTCCACATTGCCAGC          |
| CLC-1-Rv              | GTCGACCTCCAAGTGGTGTCCAAAACAAC           |
| BamHI-Tpm2-ex1-Fw     | AAAGGATCCATGGACGCCATCAAGAAGAAG          |
| XhoI-Tpm2-ex2-Rv      | AAACTCGAGGTCGGTGGCCTTCTTCTCAGC          |
| BglII-Tpm2-int1-Rv    | AAAAGATCTGTAATGACTGGAGTGGTAACT          |
| Sall-Tpm2-int1-Fw     | AAAAAAGTCGACAAAGCTGCAATGGGTCCTAGC       |
| FITC-GFP-Fw           | (FITC)-CATGGTCCTGCTGGAGTTCGTG           |
| Tpm2-ex2-splicing-Rv2 | GGAGGGCCTGCTGCTCTTC                     |
| NheI-RFP-Fw           | TATGCTAGCGCCACCATGGCCTCCTCCGAGGACGTCATC |
| BglII-RFP-Rv          | TATAGATCTGGCGCCGGTGGAGTGGCGGCC          |
| BglII-DMPK-ex15-Fw    | AAAAGATCTATGGCCCCCGGCCGTGGCT            |
| XhoI-DMPK-3UTR-Rv     | AAACTCGAGAGCTTTGGGCAGATGGAGGG           |
| DMPK3UTR-Sall-Fw      | GCCGGGAATGGTCGACGGGGGATCACAGACCATTT     |
| DMPK3UTR-Sall-Rv      | GTGATCCCCCGTCGACCATTCCCGGCTACAAGGAC     |
| Actn1-Fw              | GGATCCCACATCCGTGTGGGCTGGGAGCAG          |
| Actn1-Rv              | GTCGACCTTATCTCCAGCCAGGATCTTGAA          |

**Supplementary  
Table S2**

**Oligonucleotide sequences used for miRNA-based RNAi vectors**

| <b>Oligonucleotide</b>             | <b>Sequence</b>                                                                                                                         |
|------------------------------------|-----------------------------------------------------------------------------------------------------------------------------------------|
| miMBNL1-150Fw<br>miMBNL1-150Rv     | TGCTGAATGAATCAAAGCAGGCGATTGTTTTGGCCACTGACTGACAATCGCCTTTTGATTCATT<br>CCTGAATGAATCAAAGGCGATTGTCAGTCAGTGGCCAAAACAATCGCCTGCTTTGATTCATTC     |
| miMBNL1-236Fw<br>miMBNL1-236Rv     | TGCTGTATTGCGTCCATTTATCTCCAGTTTTGGCCACTGACTGACTGGAGATATGGACGCAATA<br>CCTGTATTGCGTCCATATCTCCAGTCAGTCAGTGGCCAAAACCTGGAGATAAATGGACGCAATAC   |
| miMBNL2-48Fw<br>miMBNL2-48Rv       | TGCTGTGAAACTGTCTGCAGACTTCTGTTTTGGCCACTGACTGACAGAAGTCTAGACAGTTTCA<br>CCTGTGAAACTGTCTAGACTTCTGTCTAGTCAGTGGCCAAAACAGAAGTCTGCAGACAGTTTCAC   |
| miMBNL2-675Fw<br>miMBNL2-675Rv     | TGCTGTTGCATTTCTCCCTCATGCAAGTTTTGGCCACTGACTGACTTGCATGAGAGAAATGCAA<br>CCTGTTGCATTTCTCTCATGCAAGTCAGTCAGTGGCCAAAACCTTGCATGAGGGAGAAATGCAAC   |
| miLuc-200Fw<br>miLuc-200Rv         | TGCTGTATTCAGCCCATATCGTTTCAGTTTTGGCCACTGACTGACTGAAACGATGGGCTGAATA<br>CCTGTATTCAGCCCATCGTTTCAGTCAGTCAGTGGCCAAAACCTGAAACGATATGGGCTGAATAC   |
| miLacZ-309Fw<br>miLacZ-309Rv       | TGCTGACAAACGGCGGATTGACCGTAGTTTTGGCCACTGACTGACTACGGTCACCGCCGTTTGT<br>CCTGACAAACGGCGGTGACCGTAGTCAGTCAGTGGCCAAAACCTACGGTCAATCCGCCGTTTGTCT  |
| miMbn1-146Fw<br>miMbn1-146Rv       | TGCTGAATCAAAGCAGGCGATTACTCGTTTTGGCCACTGACTGACGAGTAATCCTGCTTTGATT<br>CCTGAATCAAAGCAGGATTACTCGTCAGTCAGTGGCCAAAACGAGTAATCGCCTGCTTTGATTC    |
| miMbn1-236Fw<br>miMbn1-236Rv       | TGCTGTATTCCGCCCATTTATCTCTAGTTTTGGCCACTGACTGACTAGAGATATGGGCGGAATA<br>CCTGTATTCCGCCCATATCTCTAGTCAGTCAGTGGCCAAAACCTAGAGATAAATGGGCGGAATAC   |
| miMbn2-182Fw<br>miMbn2-182Rv       | TGCTGATTTGCAGTTCTCTTGAACGTTTTGGCCACTGACTGACGTTCAAGAGAACTGCAAAT<br>CCTGATTTGCAGTTCTCTTGAACGTCAGTCAGTGGCCAAAACGTTCAAGAGAGAACTGCAAATC      |
| miCugbp1-194Fw<br>miCugbp1-194Rv   | TGCTGTTTCATAGACAGCACCATACTGTTTTGGCCACTGACTGACAGTATGGTTGTCTATGAAA<br>CCTGTTTCATAGACAACCATACTGTCTAGTCAGTGGCCAAAACAGTATGGTGCTGTCTATGAAAC   |
| miCugbp1-559Fw<br>miCugbp1-559Rv   | TGCTGTTTGATAGCTGTCTGTGCCATGTTTTGGCCACTGACTGACATGGCACACAGCTATCAAA<br>CCTGTTTGATAGCTGTGTGCCATGTCTAGTCAGTGGCCAAAACATGGCACAGACAGCTATCAAAC   |
| miCugbp2-239Fw<br>miCugbp2-239Rv   | TGCTGTCTGGTAGACAGCTCCATAAGGTTTTGGCCACTGACTGACCTTATGGATGTCTACCAGA<br>CCTGTCTGGTAGACATCCATAAGGTCAGTCAGTGGCCAAAACCTTATGGAGCTGTCTACCAGAC    |
| miCugbp2-1091Fw<br>miCugbp2-1091Rv | TGCTGTATTCAATCCGACAGTGGCTCGTTTTGGCCACTGACTGACGAGCCACTCGGATTGAATA<br>CCTGTATTCAATCCGAGTGGCTCGTCAGTCAGTGGCCAAAACGAGCCACTGTCTGGATTGAATAC   |
| miCelf4-840Fw<br>miCelf4-840Rv     | TGCTGATGGGATTCAGGTAGCCTCCTGTTTTGGCCACTGACTGACAGGAGGCTCTGAATCCCAT<br>CCTGATGGGATTCAGAGCCTCCTGTCTAGTCAGTGGCCAAAACAGGAGGCTACCTGAATCCCATC   |
| miCelf4-1304Fw<br>miCelf4-1304Rv   | TGCTGAAGGGAGGAACATCTGCATCAGTTTTGGCCACTGACTGACTGATGCAGGTTCCCTCCCTT<br>CCTGAAGGGAGGAACCTGCATCAGTCAGTCAGTGGCCAAAACCTGATGCAGATGTTCCCTCCCTTC |

**Supplementary Table S3 Primer sequences for quantitative PCR**

| <b>Primer</b>         | <b>Sequence</b>               |
|-----------------------|-------------------------------|
| RT-Mbn1-Fw            | TTGCTCCAGAGAGAACTGCAAA        |
| RT-Mbn1-Rv            | AAGTTATTCCGCCATTTATCTCTAA     |
| RT-Mbn2-Fw            | CGGCAGACAGCACCATGA            |
| RT-Mbn2-Rv            | CGCCCCTTTATGTAATCCATACA       |
| RT-MBNL1-Fw           | TCAGTCAAAGGGCACCATTCT         |
| RT-MBNL1-Rv           | TTATCTGTATTGAGAGAGTTTGTGTTGTG |
| Gapdh-Fw              | TGTGTCCGTCGTGGATCTGA          |
| Gapdh-Rv              | CCTGCTTCACCACCTTCTTGA         |
| RT-Clcn1-int6-Fw2     | TCCCCTCTGTCCAGCTTCTG          |
| RT-Clcn1-int6-Rv2     | GCCTGGCTCAGTCACCAAA           |
| RT-Clcn1-int12-MGB-Fw | TTAATGTTGGCAAAGGGATGTC        |
| RT-Clcn1-int12-MGB-Rv | ACACTTCGCACACCGTGAGA          |
| RT-Clcn1-3UTR-MGB-Fw  | GCAGGTTCAGTCCCTATCACTCTAA     |
| RT-Clcn1-3UTR-MGB-Rv  | GCCAGGATGGTGAACA              |

# Supplementary Figure S1

**A**

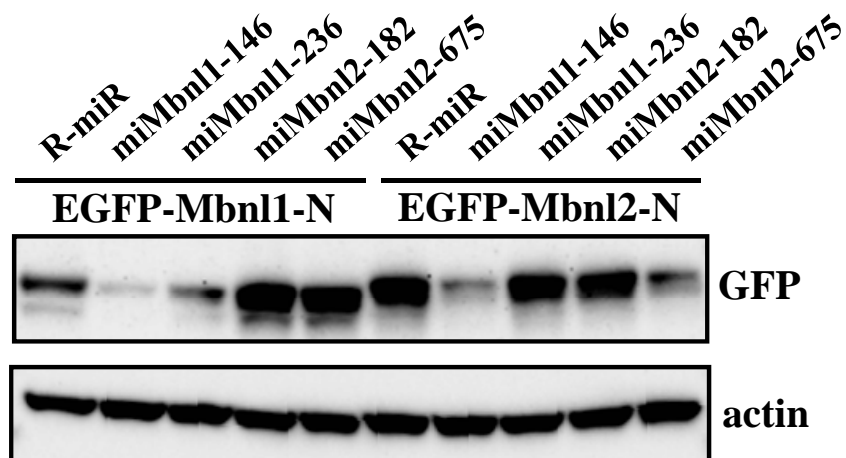

**B**

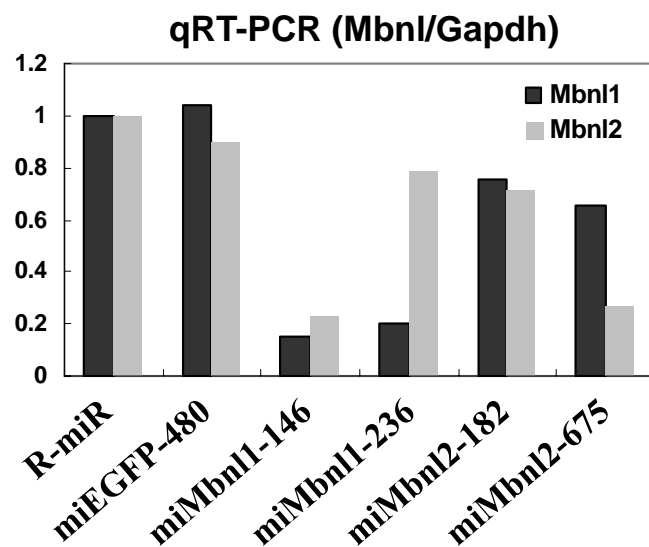

**C**

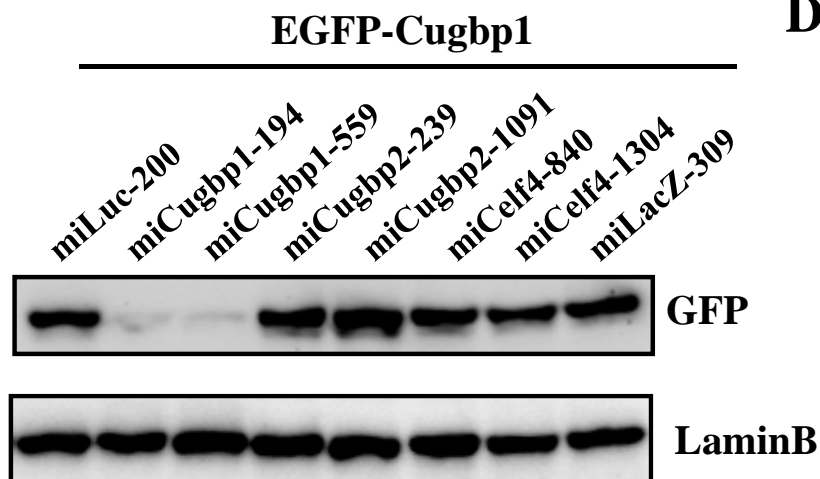

**D**

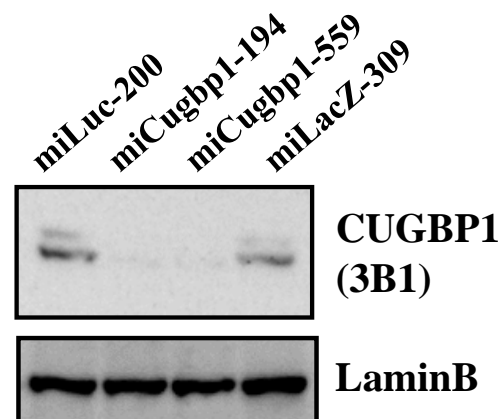

# Supplementary Figure S2

**A**

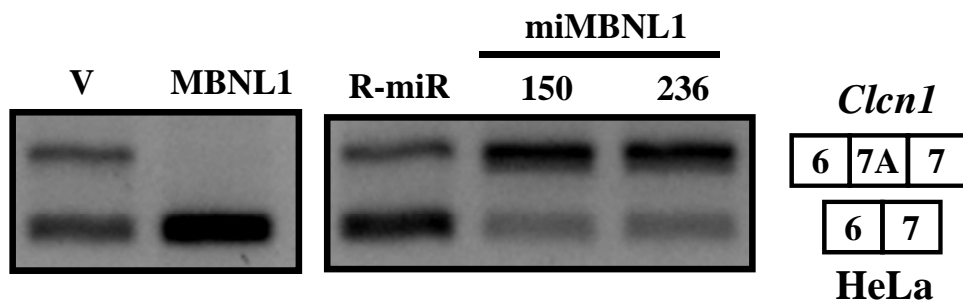

**B**

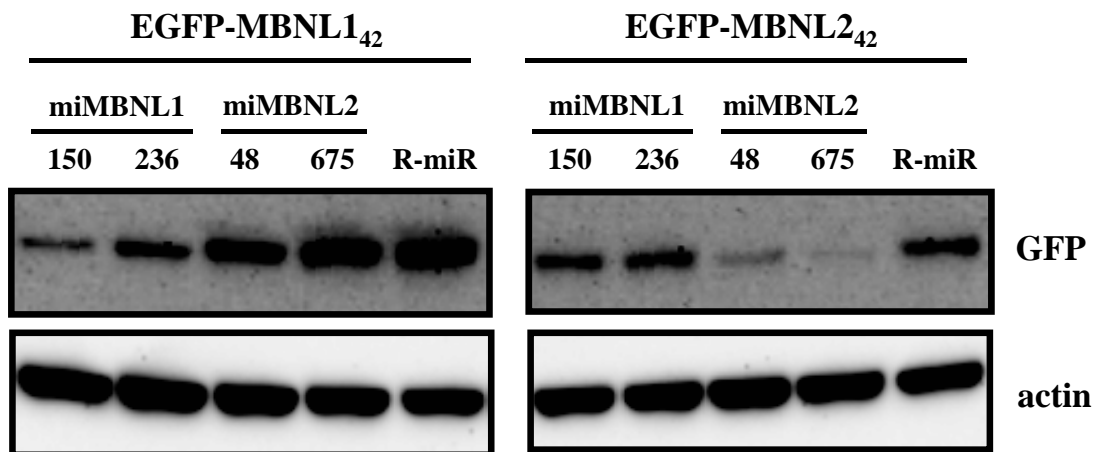

**C**

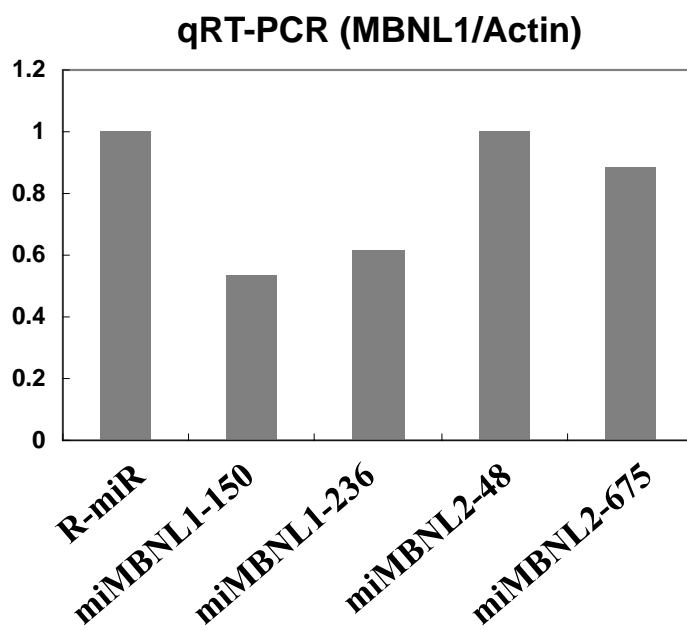

# Supplementary Figure S3

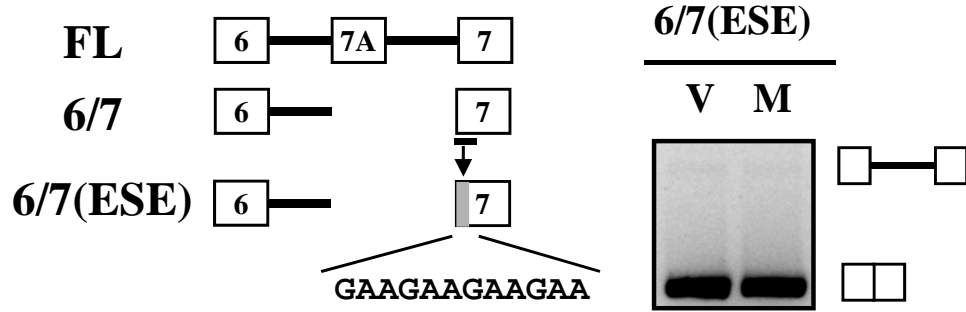

# Supplementary Figure S4

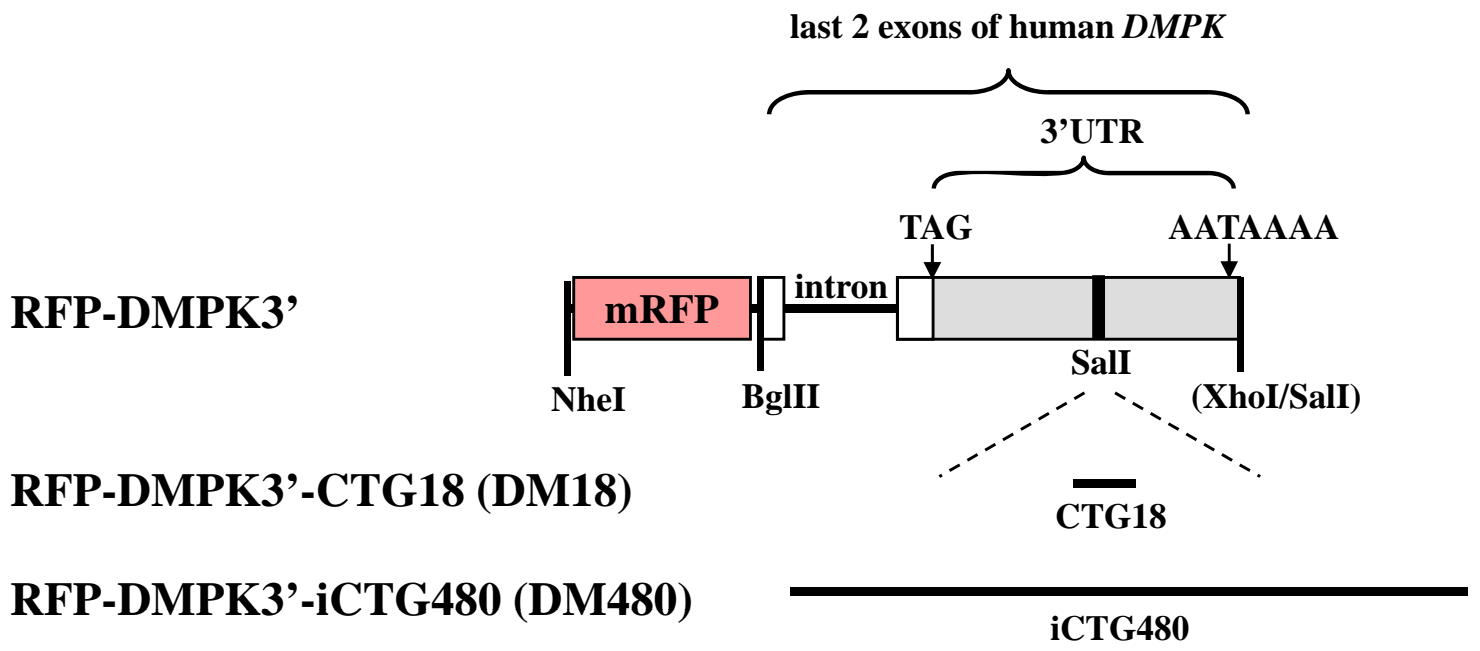

# Supplementary Figure S5

**A**

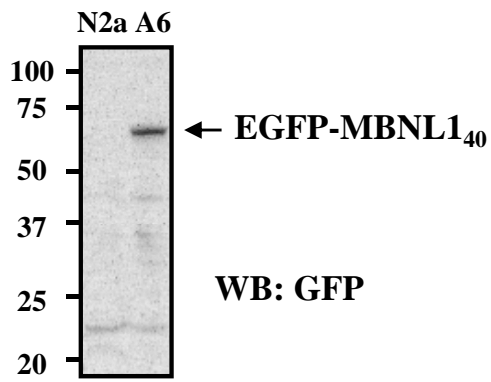

**B**

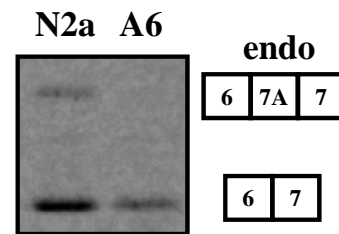

**C**

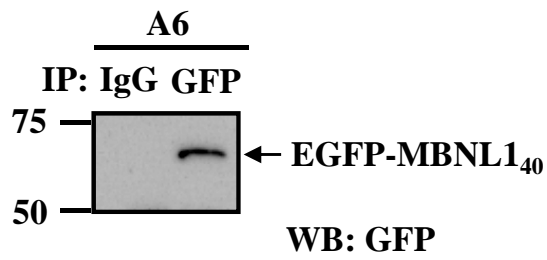



# Supplementary Figure S6

**A**

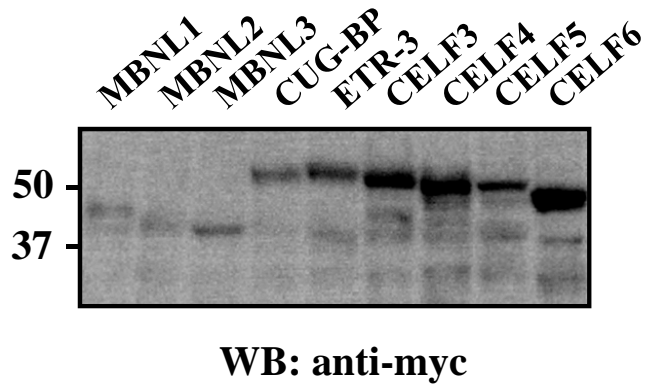

**B**

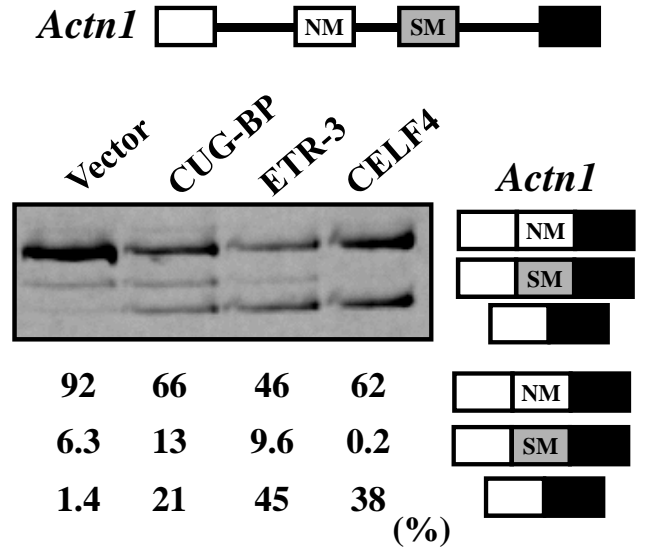

Supplement: gkp681_2.pdf [file gkp681_2.pdf]
