# Supplementary material for: MBNL and CELF proteins regulate alternative splicing of the skeletal muscle chloride channel CLCN1
Source: PubMed Central journal article supplement — Nucleic Acids Res. 2009 Aug 31;37(19):6477–90. doi: 10.1093/nar/gkp681 (PMC2770659; doi:10.1093/nar/gkp681), 2009-08-31
Supplement: gkp681v2_1.pdf [file gkp681v2_1.pdf]

## NF90 Targets identified by RNP IP followed by microarray analysis

| Accession   | Symbol        | Gene Names                                                                                                                                                                      |
|-------------|---------------|---------------------------------------------------------------------------------------------------------------------------------------------------------------------------------|
| NM_006360.2 | GA17          | Homo sapiens dendritic cell protein (GA17), mRNA.                                                                                                                               |
| NM_021227.2 | DC2           | Homo sapiens DC2 protein (DC2), mRNA.                                                                                                                                           |
| NM_003798.1 | CTNNAL1       | Homo sapiens catenin (cadherin-associated protein), alpha-like 1 (CTNNAL1), mRNA.                                                                                               |
| NM_014098.2 | PRDX3         | Homo sapiens peroxiredoxin 3 (PRDX3), nuclear gene encoding mitochondrial protein, transcript variant 2, mRNA.                                                                  |
| NM_138459.2 | C6orf68       | Homo sapiens chromosome 6 open reading frame 68 (C6orf68), mRNA.                                                                                                                |
| XM_352299.1 | LOC376584     | Homo sapiens similar to DC2 protein (LOC376584), mRNA.                                                                                                                          |
| NM_006835.2 | CCNI          | Homo sapiens cyclin I (CCNI), mRNA.                                                                                                                                             |
| NM_002635.1 | SLC25A3       | Homo sapiens solute carrier family 25 (mitochondrial carrier; phosphate carrier), member 3 (SLC25A3), nuclear gene encoding mitochondrial protein, transcript variant 1b, mRNA. |
| NM_001316.2 | CSE1L         | Homo sapiens CSE1 chromosome segregation 1-like (yeast) (CSE1L), transcript variant 1, mRNA.                                                                                    |
| NM_002789.3 | PSMA4         | Homo sapiens proteasome (prosome, macropain) subunit, alpha type, 4 (PSMA4), mRNA.                                                                                              |
| NM_173177.1 | C1D           | Homo sapiens nuclear DNA-binding protein (C1D), transcript variant 2, mRNA.                                                                                                     |
| NM_015420.4 | DKFZP564O0463 | Homo sapiens DKFZP564O0463 protein (DKFZP564O0463), mRNA.                                                                                                                       |
| NM_004730.1 | ETF1          | Homo sapiens eukaryotic translation termination factor 1 (ETF1), mRNA.                                                                                                          |
| NM_005080.2 | XBP1          | Homo sapiens X-box binding protein 1 (XBP1), mRNA.                                                                                                                              |
| NM_032351.3 | MRPL45        | Homo sapiens mitochondrial ribosomal protein L45 (MRPL45), nuclear gene encoding mitochondrial protein, mRNA.                                                                   |
| NM_182649.1 | PCNA          | Homo sapiens proliferating cell nuclear antigen (PCNA), transcript variant 2, mRNA.                                                                                             |
| NM_002786.2 | PSMA1         | Homo sapiens proteasome (prosome, macropain) subunit, alpha type, 1 (PSMA1), transcript variant 2, mRNA.                                                                        |
| NM_002902.1 | RCN2          | Homo sapiens reticulocalbin 2, EF-hand calcium binding domain (RCN2), mRNA.                                                                                                     |
| NM_004251.3 | RAB9A         | Homo sapiens RAB9A, member RAS oncogene family (RAB9A), mRNA.                                                                                                                   |
| NM_003630.1 | PEX3          | Homo sapiens peroxisomal biogenesis factor 3 (PEX3), mRNA.                                                                                                                      |
| NM_016640.2 | MRPS30        | Homo sapiens mitochondrial ribosomal protein S30 (MRPS30), nuclear gene encoding mitochondrial protein, mRNA.                                                                   |
| NM_004125.2 | GNG10         | Homo sapiens guanine nucleotide binding protein (G protein), gamma 10 (GNG10), mRNA.                                                                                            |
| NM_004236.1 | TRIP15        | Homo sapiens thyroid receptor interacting protein 15 (TRIP15), mRNA.                                                                                                            |
| NM_016275.3 | SELT          | Homo sapiens selenoprotein T (SELT), mRNA.                                                                                                                                      |
| NM_001786.2 | CDC2          | Homo sapiens cell division cycle 2, G1 to S and G2 to M (CDC2), transcript variant 1, mRNA.                                                                                     |
| NM_052932.1 | PORIMIN       | Homo sapiens pro-oncosis receptor inducing membrane injury gene (PORIMIN), mRNA.                                                                                                |
| NM_005776.1 | CNIH          | Homo sapiens cornichon homolog (Drosophila) (CNIH), mRNA.                                                                                                                       |
| NM_018492.2 | TOPK          | Homo sapiens T-LAK cell-originated protein kinase (TOPK), mRNA.                                                                                                                 |
| NM_002358.2 | MAD2L1        | Homo sapiens MAD2 mitotic arrest deficient-like 1 (yeast) (MAD2L1), mRNA.                                                                                                       |
| NM_013283.3 | MAT2B         | Homo sapiens methionine adenosyltransferase II, beta (MAT2B), transcript variant 1, mRNA.                                                                                       |
| NM_004718.2 | COX7A2L       | Homo sapiens cytochrome c oxidase subunit VIIa polypeptide 2 like (COX7A2L), nuclear gene encoding mitochondrial protein, mRNA.                                                 |
| NM_012325.1 | MAPRE1        | Homo sapiens microtubule-associated protein, RP/EB family, member 1 (MAPRE1), mRNA.                                                                                             |
| NM_018509.2 | PRO1855       | Homo sapiens hypothetical protein PRO1855 (PRO1855), mRNA.                                                                                                                      |
| NM_182649.1 | PCNA          | Homo sapiens proliferating cell nuclear antigen (PCNA), transcript variant 2, mRNA.                                                                                             |
| NM_001212.3 | C1QBP         | Homo sapiens complement component 1, q subcomponent binding protein (C1QBP), nuclear gene encoding mitochondrial protein, mRNA.                                                 |
| NM_014765.1 | TOMM20        | Homo sapiens translocase of outer mitochondrial membrane 20 homolog (yeast) (TOMM20), mRNA.                                                                                     |
| NM_015702.1 | CL25022       | Homo sapiens hypothetical protein CL25022 (CL25022), mRNA.                                                                                                                      |
| NM_014637.2 | CHPPR         | Homo sapiens likely ortholog of chicken chondrocyte protein with a poly-proline region (CHPPR), mRNA.                                                                           |
| NM_014670.2 | BZW1          | Homo sapiens basic leucine zipper and W2 domains 1 (BZW1), mRNA.                                                                                                                |
| NM_001777.2 | CD47          | Homo sapiens CD47 antigen (Rh-related antigen, integrin-associated signal transducer) (CD47), transcript variant 1, mRNA.                                                       |
| NM_033379.2 | CDC2          | Homo sapiens cell division cycle 2, G1 to S and G2 to M (CDC2), transcript variant 2, mRNA.                                                                                     |
| NM_000158.1 | GBE1          | Homo sapiens glucan (1,4-alpha-), branching enzyme 1 (glycogen branching enzyme, Andersen disease, glycogen storage disease type IV) (GBE1), mRNA.                              |
| NM_017421.2 | COQ3          | Homo sapiens coenzyme Q3 homolog, methyltransferase (yeast) (COQ3), mRNA.                                                                                                       |
| NM_017918.3 | FLJ20647      | Homo sapiens hypothetical protein FLJ20647 (FLJ20647), mRNA.                                                                                                                    |
| XM_370710.2 | LOC387902     | Homo sapiens similar to protein 40kD (LOC387902), mRNA.                                                                                                                         |
| NM_152522.2 | MGC33864      | Homo sapiens ADP-ribosylation-like factor 6-interacting protein 6 (MGC33864), mRNA.                                                                                             |
| NM_002765.2 | PRPS2         | Homo sapiens phosphoribosyl pyrophosphate synthetase 2 (PRPS2), mRNA.                                                                                                           |
| NM_148174.1 | OAZIN         | Homo sapiens ornithine decarboxylase antizyme inhibitor (OAZIN), transcript variant 2, mRNA.                                                                                    |
| XM_087593.7 | KIAA1430      | Homo sapiens KIAA1430 protein (KIAA1430), mRNA.                                                                                                                                 |
| NM_044472.1 | CDC42         | Homo sapiens cell division cycle 42 (GTP binding protein, 25kDa) (CDC42), transcript variant 2, mRNA.                                                                           |
| NM_025146.1 | MAK3P         | Homo sapiens likely ortholog of mouse Mak3p homolog (S. cerevisiae) (MAK3P), mRNA.                                                                                              |
| NM_054014.1 | FKBP1A        | Homo sapiens FK506 binding protein 1A, 12kDa (FKBP1A), transcript variant 12A, mRNA.                                                                                            |
| NM_000532.2 | PCCB          | Homo sapiens propionyl Coenzyme A carboxylase, beta polypeptide (PCCB), mRNA.                                                                                                   |
| NM_006330.2 | LYPLA1        | Homo sapiens lysophospholipase I (LYPLA1), mRNA.                                                                                                                                |
| NM_080651.1 | THRAP6        | Homo sapiens thyroid hormone receptor associated protein 6 (THRAP6), mRNA.                                                                                                      |
| NM_014038.1 | BZW2          | Homo sapiens basic leucine zipper and W2 domains 2 (BZW2), mRNA.                                                                                                                |

|             |               |                                                                                                                                                   |
|-------------|---------------|---------------------------------------------------------------------------------------------------------------------------------------------------|
| NM_016338.3 | IPO11         | Homo sapiens importin 11 (IPO11), mRNA.                                                                                                           |
| NM_006009.2 | TUBA3         | Homo sapiens tubulin, alpha 3 (TUBA3), mRNA.                                                                                                      |
| NM_177436.1 | CSE1L         | Homo sapiens CSE1 chromosome segregation 1-like (yeast) (CSE1L), transcript variant 2, mRNA.                                                      |
| NM_007373.2 | SHOC2         | Homo sapiens soc-2 suppressor of clear homolog (C. elegans) (SHOC2), mRNA.                                                                        |
| NM_014050.2 | MRPL42        | Homo sapiens mitochondrial ribosomal protein L42 (MRPL42), nuclear gene encoding mitochondrial protein, transcript variant 1, mRNA.               |
| NM_016289.2 | MO25          | Homo sapiens MO25 protein (MO25), mRNA.                                                                                                           |
| NM_020357.1 | PCNP          | Homo sapiens PEST-containing nuclear protein (PCNP), mRNA.                                                                                        |
| NM_012286.1 | MORF4L2       | Homo sapiens mortality factor 4 like 2 (MORF4L2), mRNA.                                                                                           |
| NM_001527.1 | HDAC2         | Homo sapiens histone deacetylase 2 (HDAC2), mRNA.                                                                                                 |
| NM_016627.2 | LOC51321      | Homo sapiens hypothetical protein LOC51321 (LOC51321), mRNA.                                                                                      |
| NM_003017.3 | SFRS3         | Homo sapiens splicing factor, arginine/serine-rich 3 (SFRS3), mRNA.                                                                               |
| NM_002268.3 | KPNA4         | Homo sapiens karyopherin alpha 4 (importin alpha 3) (KPNA4), mRNA.                                                                                |
| NM_006572.3 | GNA13         | Homo sapiens guanine nucleotide binding protein (G protein), alpha 13 (GNA13), mRNA.                                                              |
| NM_018847.1 | KIAA1354      | Homo sapiens KIAA1354 protein (KIAA1354), mRNA.                                                                                                   |
| NM_021821.2 | MRPS35        | Homo sapiens mitochondrial ribosomal protein S35 (MRPS35), nuclear gene encoding mitochondrial protein, mRNA.                                     |
| NM_015938.2 | CGI-07        | Homo sapiens CGI-07 protein (CGI-07), mRNA.                                                                                                       |
| NM_005717.2 | ARPC5         | Homo sapiens actin related protein 2/3 complex, subunit 5, 16kDa (ARPC5), mRNA.                                                                   |
| NM_004593.1 | SFRS10        | Homo sapiens splicing factor, arginine/serine-rich 10 (transformer 2 homolog, Drosophila) (SFRS10), mRNA.                                         |
| NM_138288.1 | C14orf147     | Homo sapiens chromosome 14 open reading frame 147 (C14orf147), mRNA.                                                                              |
| NM_018112.1 | C9orf87       | Homo sapiens chromosome 9 open reading frame 87 (C9orf87), mRNA.                                                                                  |
| NM_183399.1 | RNF14         | Homo sapiens ring finger protein 14 (RNF14), transcript variant 3, mRNA.                                                                          |
| NM_152407.2 | GRPEL2        | Homo sapiens GrpE-like 2, mitochondrial (E. coli) (GRPEL2), mRNA.                                                                                 |
| NM_015713.3 | RRM2B         | Homo sapiens ribonucleotide reductase M2 B (TP53 inducible) (RRM2B), mRNA.                                                                        |
| NM_017975.2 | FLJ10036      | Homo sapiens hypothetical protein FLJ10036 (FLJ10036), mRNA.                                                                                      |
| NM_022458.2 | C7orf2        | Homo sapiens chromosome 7 open reading frame 2 (C7orf2), mRNA.                                                                                    |
| NM_002822.3 | PTK9          | Homo sapiens PTK9 protein tyrosine kinase 9 (PTK9), transcript variant 1, mRNA.                                                                   |
| NM_032016.2 | STARD3NL      | Homo sapiens STARD3 N-terminal like (STARD3NL), mRNA.                                                                                             |
| NM_002598.2 | PDCD2         | Homo sapiens programmed cell death 2 (PDCD2), transcript variant 1, mRNA.                                                                         |
| NM_015161.1 | ARL6IP        | Homo sapiens ADP-ribosylation factor-like 6 interacting protein (ARL6IP), mRNA.                                                                   |
| NM_033087.1 | ALG2          | Homo sapiens asparagine-linked glycosylation 2 homolog (yeast, alpha-1,3-mannosyltransferase) (ALG2), transcript variant 1, mRNA.                 |
| NM_006636.2 | MTHFD2        | Homo sapiens methylene tetrahydrofolate dehydrogenase (NAD+ dependent), methenyltetrahydrofolate cyclohydrolase (MTHFD2), mRNA.                   |
| NM_001964.2 | EGR1          | Homo sapiens early growth response 1 (EGR1), mRNA.                                                                                                |
| NM_152132.1 | PSMA3         | Homo sapiens proteasome (prosome, macropain) subunit, alpha type, 3 (PSMA3), transcript variant 2, mRNA.                                          |
| NM_176867.2 | PPA2          | Homo sapiens inorganic pyrophosphatase 2 (PPA2), transcript variant 4, mRNA.                                                                      |
| NM_052822.2 | SCAMP1        | Homo sapiens secretory carrier membrane protein 1 (SCAMP1), transcript variant 2, mRNA.                                                           |
| XM_379792.1 | LOC402464     | Homo sapiens similar to TWIST neighbor (LOC402464), mRNA.                                                                                         |
| NM_032154.3 | RNF134        | Homo sapiens ring finger protein 134 (RNF134), mRNA.                                                                                              |
| NM_006527.2 | SLBP          | Homo sapiens stem-loop (histone) binding protein (SLBP), mRNA.                                                                                    |
| NM_024057.2 | Nup37         | Homo sapiens nucleoporin Nup37 (Nup37), mRNA.                                                                                                     |
| NM_004414.5 | DSCR1         | Homo sapiens Down syndrome critical region gene 1 (DSCR1), transcript variant 1, mRNA.                                                            |
| NM_012260.1 | HPCL2         | Homo sapiens 2-hydroxyphytanoyl-CoA lyase (HPCL2), mRNA.                                                                                          |
| NM_017845.2 | COMMD8        | Homo sapiens COMM domain containing 8 (COMMD8), mRNA.                                                                                             |
| NM_001839.1 | CNN3          | Homo sapiens calponin 3, acidic (CNN3), mRNA.                                                                                                     |
| NM_005494.2 | DNAJB6        | Homo sapiens DnaJ (Hsp40) homolog, subfamily B, member 6 (DNAJB6), transcript variant 2, mRNA.                                                    |
| NM_016129.2 | COPS4         | Homo sapiens COP9 constitutive photomorphogenic homolog subunit 4 (Arabidopsis) (COPS4), mRNA.                                                    |
| NM_004492.1 | GTF2A2        | Homo sapiens general transcription factor IIA, 2 (12kD subunit) (GTF2A2), mRNA.                                                                   |
| NM_000126.1 | ETFFA         | Homo sapiens electron-transfer-flavoprotein, alpha polypeptide (glutaric aciduria II) (ETFFA), nuclear gene encoding mitochondrial protein, mRNA. |
| NM_016645.1 | NEUGRIN       | Homo sapiens mesenchymal stem cell protein DSC92 (NEUGRIN), mRNA.                                                                                 |
| NM_015462.2 | DKFZP586L0724 | Homo sapiens DKFZP586L0724 protein (DKFZP586L0724), mRNA.                                                                                         |
| NM_001693.2 | ATP6V1B2      | Homo sapiens ATPase, H+ transporting, lysosomal 56/58kDa, V1 subunit B, isoform 2 (ATP6V1B2), mRNA.                                               |
| NM_002979.2 | SCP2          | Homo sapiens sterol carrier protein 2 (SCP2), mRNA.                                                                                               |
| NM_174871.1 | PSMD12        | Homo sapiens proteasome (prosome, macropain) 26S subunit, non-ATPase, 12 (PSMD12), transcript variant 2, mRNA.                                    |
| NM_022130.3 | GOLPH3        | Homo sapiens golgi phosphoprotein 3 (coat-protein) (GOLPH3), mRNA.                                                                                |
| NM_001021.2 | RPS17         | Homo sapiens ribosomal protein S17 (RPS17), mRNA.                                                                                                 |
| NM_018184.1 | ARL10C        | Homo sapiens ADP-ribosylation factor-like 10C (ARL10C), mRNA.                                                                                     |
| NM_003941.2 | WASL          | Homo sapiens Wiskott-Aldrich syndrome-like (WASL), mRNA.                                                                                          |
| NM_018465.1 | C9orf46       | Homo sapiens chromosome 9 open reading frame 46 (C9orf46), mRNA.                                                                                  |
| NM_013943.1 | CLIC4         | Homo sapiens chloride intracellular channel 4 (CLIC4), mRNA.                                                                                      |
| NM_018639.3 | WSB2          | Homo sapiens WD repeat and SOCS box-containing 2 (WSB2), mRNA.                                                                                    |
| NM_002267.2 | KPNA3         | Homo sapiens karyopherin alpha 3 (importin alpha 4) (KPNA3), mRNA.                                                                                |

|             |           |                                                                                                                                                             |
|-------------|-----------|-------------------------------------------------------------------------------------------------------------------------------------------------------------|
| NM_002786.2 | PSMA1     | Homo sapiens proteasome (prosome, macropain) subunit, alpha type, 1 (PSMA1), transcript variant 2, mRNA.                                                    |
| NM_152682.1 | MGC10198  | Homo sapiens hypothetical protein MGC10198 (MGC10198), mRNA.                                                                                                |
| NM_002764.2 | PRPS1     | Homo sapiens phosphoribosyl pyrophosphate synthetase 1 (PRPS1), mRNA.                                                                                       |
| NM_005789.2 | PSME3     | Homo sapiens proteasome (prosome, macropain) activator subunit 3 (PA28 gamma; Ki) (PSME3), transcript variant 1, mRNA.                                      |
| NM_004627.2 | WRB       | Homo sapiens tryptophan rich basic protein (WRB), mRNA.                                                                                                     |
| NM_000640.2 | IL13RA2   | Homo sapiens interleukin 13 receptor, alpha 2 (IL13RA2), mRNA.                                                                                              |
| NM_005746.1 | PBEF1     | Homo sapiens pre-B-cell colony enhancing factor 1 (PBEF1), transcript variant 1, mRNA.                                                                      |
| NM_032299.2 | MGC2714   | Homo sapiens hypothetical protein MGC2714 (MGC2714), mRNA.                                                                                                  |
| NM_178584.1 | SEPT10    | Homo sapiens septin 10 (SEPT10), transcript variant 2, mRNA.                                                                                                |
| NM_001968.1 | EIF4E     | Homo sapiens eukaryotic translation initiation factor 4E (EIF4E), mRNA.                                                                                     |
| NM_005190.2 | CCNC      | Homo sapiens cyclin C (CCNC), mRNA.                                                                                                                         |
| NM_006136.2 | CAPZA2    | Homo sapiens capping protein (actin filament) muscle Z-line, alpha 2 (CAPZA2), mRNA.                                                                        |
| NM_014394.1 | GHITM     | Homo sapiens growth hormone inducible transmembrane protein (GHITM), mRNA.                                                                                  |
| NM_004896.2 | VPS26     | Homo sapiens vacuolar protein sorting 26 (yeast) (VPS26), mRNA.                                                                                             |
| NM_007285.6 | GABARAPL2 | Homo sapiens GABA(A) receptor-associated protein-like 2 (GABARAPL2), mRNA.                                                                                  |
| NM_015957.1 | MMRP19    | Homo sapiens likely ortholog of mouse monocyte macrophage 19 (MMRP19), mRNA.                                                                                |
| NM_000983.2 | RPL22     | Homo sapiens ribosomal protein L22 (RPL22), mRNA.                                                                                                           |
| NM_003372.3 | VBP1      | Homo sapiens von Hippel-Lindau binding protein 1 (VBP1), mRNA.                                                                                              |
| NM_005917.2 | MDH1      | Homo sapiens malate dehydrogenase 1, NAD (soluble) (MDH1), mRNA.                                                                                            |
| NM_000194.1 | HPRT1     | Homo sapiens hypoxanthine phosphoribosyltransferase 1 (Lesch-Nyhan syndrome) (HPRT1), mRNA.                                                                 |
| NM_022366.1 | TFB2M     | Homo sapiens transcription factor B2, mitochondrial (TFB2M), mRNA.                                                                                          |
| NM_000274.1 | OAT       | Homo sapiens ornithine aminotransferase (gyrate atrophy) (OAT), nuclear gene encoding mitochondrial protein, mRNA.                                          |
| NM_006430.2 | CCT4      | Homo sapiens chaperonin containing TCP1, subunit 4 (delta) (CCT4), mRNA.                                                                                    |
| NM_005324.3 | H3F3B     | Homo sapiens H3 histone, family 3B (H3.3B) (H3F3B), mRNA.                                                                                                   |
| NM_020186.1 | ACN9      | Homo sapiens ACN9 homolog (S. cerevisiae) (ACN9), mRNA.                                                                                                     |
| NM_006713.2 | PC4       | Homo sapiens activated RNA polymerase II transcription cofactor 4 (PC4), mRNA.                                                                              |
| NM_020644.1 | C11orf15  | Homo sapiens chromosome 11 open reading frame 15 (C11orf15), mRNA.                                                                                          |
| NM_022121.2 | PERP      | Homo sapiens PERP, TP53 apoptosis effector (PERP), mRNA.                                                                                                    |
| NM_000791.2 | DHFR      | Homo sapiens dihydrofolate reductase (DHFR), mRNA.                                                                                                          |
| NM_003859.1 | DPM1      | Homo sapiens dolichyl-phosphate mannosyltransferase polypeptide 1, catalytic subunit (DPM1), mRNA.                                                          |
| XM_113967.3 | LOC201475 | Homo sapiens similar to Rab12 protein (LOC201475), mRNA.                                                                                                    |
| NM_018361.1 | LPAAT-e   | Homo sapiens acid acyltransferase-epsilon (LPAAT-e), mRNA.                                                                                                  |
| NM_032020.3 | FUCA2     | Homo sapiens fucosidase, alpha-L- 2, plasma (FUCA2), mRNA.                                                                                                  |
| NM_031452.2 | C6orf119  | Homo sapiens chromosome 6 open reading frame 119 (C6orf119), mRNA.                                                                                          |
| NM_001969.3 | EIF5      | Homo sapiens eukaryotic translation initiation factor 5 (EIF5), transcript variant 1, mRNA.                                                                 |
| NM_032231.3 | FLJ22875  | Homo sapiens hypothetical protein FLJ22875 (FLJ22875), mRNA.                                                                                                |
| NM_006135.1 | CAPZA1    | Homo sapiens capping protein (actin filament) muscle Z-line, alpha 1 (CAPZA1), mRNA.                                                                        |
| NM_015176.1 | KIAA0483  | Homo sapiens KIAA0483 protein (KIAA0483), mRNA.                                                                                                             |
| NM_017454.1 | STAU      | Homo sapiens staufen, RNA binding protein (Drosophila) (STAU), transcript variant T1, mRNA.                                                                 |
| NM_003754.1 | EIF3S5    | Homo sapiens eukaryotic translation initiation factor 3, subunit 5 epsilon, 47kDa (EIF3S5), mRNA.                                                           |
| NM_003584.1 | DUSP11    | Homo sapiens dual specificity phosphatase 11 (RNA/RNP complex 1-interacting) (DUSP11), mRNA.                                                                |
| NM_003653.2 | COPS3     | Homo sapiens COP9 constitutive photomorphogenic homolog subunit 3 (Arabidopsis) (COPS3), mRNA.                                                              |
| NM_005638.3 | SYBL1     | Homo sapiens synaptobrevin-like 1 (SYBL1), mRNA.                                                                                                            |
| NM_004872.3 | C1orf8    | Homo sapiens chromosome 1 open reading frame 8 (C1orf8), mRNA.                                                                                              |
| NM_013354.4 | CNOT7     | Homo sapiens CCR4-NOT transcription complex, subunit 7 (CNOT7), transcript variant 1, mRNA.                                                                 |
| NM_000637.1 | GSR       | Homo sapiens glutathione reductase (GSR), mRNA.                                                                                                             |
| NM_018394.1 | FLJ11342  | Homo sapiens hypothetical protein FLJ11342 (FLJ11342), mRNA.                                                                                                |
| NM_016090.2 | RBM7      | Homo sapiens RNA binding motif protein 7 (RBM7), mRNA.                                                                                                      |
| NM_003677.2 | DENR      | Homo sapiens density-regulated protein (DENR), mRNA.                                                                                                        |
| NM_000611.4 | CD59      | Homo sapiens CD59 antigen p18-20 (antigen identified by monoclonal antibodies 16.3A5, EJ16, EJ30, EL32 and G344) (CD59), transcript variant 2, mRNA.        |
| NM_003878.1 | GGH       | Homo sapiens gamma-glutamyl hydrolase (conjugase, folylpolyglutamyl hydrolase) (GGH), mRNA.                                                                 |
| NM_054016.1 | FUSIP1    | Homo sapiens FUS interacting protein (serine-arginine rich) 1 (FUSIP1), transcript variant 2, mRNA.                                                         |
| NM_033055.2 | HIAT1     | Homo sapiens hippocampus abundant transcript 1 (HIAT1), mRNA.                                                                                               |
| NM_001938.2 | DR1       | Homo sapiens down-regulator of transcription 1, TBP-binding (negative cofactor 2) (DR1), mRNA.                                                              |
| NM_198337.1 | INSIG1    | Homo sapiens insulin induced gene 1 (INSIG1), transcript variant 3, mRNA.                                                                                   |
| NM_130809.2 | LOC133619 | Homo sapiens hypothetical protein MGC12103 (LOC133619), mRNA.                                                                                               |
| NM_078470.2 | COX15     | Homo sapiens COX15 homolog, cytochrome c oxidase assembly protein (yeast) (COX15), nuclear gene encoding mitochondrial protein, transcript variant 1, mRNA. |
| NM_001664.1 | ARHA      | Homo sapiens ras homolog gene family, member A (ARHA), mRNA.                                                                                                |
| NM_005765.2 | ATP6AP2   | Homo sapiens ATPase, H+ transporting, lysosomal accessory protein 2 (ATP6AP2), mRNA.                                                                        |
| NM_006001.1 | TUBA2     | Homo sapiens tubulin, alpha 2 (TUBA2), transcript variant 1, mRNA.                                                                                          |

|             |           |                                                                                                                                                                  |
|-------------|-----------|------------------------------------------------------------------------------------------------------------------------------------------------------------------|
| NM_014999.1 | RAB21     | Homo sapiens RAB21, member RAS oncogene family (RAB21), mRNA.                                                                                                    |
| NM_002709.1 | PPP1CB    | Homo sapiens protein phosphatase 1, catalytic subunit, beta isoform (PPP1CB), mRNA.                                                                              |
| NM_018434.4 | RNF130    | Homo sapiens ring finger protein 130 (RNF130), mRNA.                                                                                                             |
| NM_054026.1 | CNOT7     | Homo sapiens CCR4-NOT transcription complex, subunit 7 (CNOT7), transcript variant 2, mRNA.                                                                      |
| XM_058628.5 | C14orf109 | Homo sapiens chromosome 14 open reading frame 109 (C14orf109), mRNA.                                                                                             |
| NM_014034.1 | ASF1A     | Homo sapiens ASF1 anti-silencing function 1 homolog A (S. cerevisiae) (ASF1A), mRNA.                                                                             |
| NM_144600.1 | FLJ31153  | Homo sapiens hypothetical protein FLJ31153 (FLJ31153), mRNA.                                                                                                     |
| NM_012251.1 | TFAM      | Homo sapiens transcription factor A, mitochondrial (TFAM), mRNA.                                                                                                 |
| NM_001256.2 | CDC27     | Homo sapiens cell division cycle 27 (CDC27), mRNA.                                                                                                               |
| NM_173470.1 | LOC93380  | Homo sapiens hypothetical protein LOC93380 (LOC93380), mRNA.                                                                                                     |
| NM_152330.2 | C14orf31  | Homo sapiens chromosome 14 open reading frame 31 (C14orf31), mRNA.                                                                                               |
| NM_024683.1 | FLJ22729  | Homo sapiens hypothetical protein FLJ22729 (FLJ22729), mRNA.                                                                                                     |
| NM_005171.2 | ATF1      | Homo sapiens activating transcription factor 1 (ATF1), mRNA.                                                                                                     |
| NM_015360.2 | KIAA0052  | Homo sapiens KIAA0052 protein (KIAA0052), mRNA.                                                                                                                  |
| NM_003781.2 | B3GALT3   | Homo sapiens UDP-Gal:betaGlcNAc beta 1,3-galactosyltransferase, polypeptide 3 (B3GALT3), transcript variant 1, mRNA.                                             |
| XM_352485.1 | LOC376965 | Homo sapiens similar to ATP synthase alpha chain, mitochondrial precursor (LOC376965), mRNA.                                                                     |
| NM_017801.2 | CKLFSF6   | Homo sapiens chemokine-like factor super family 6 (CKLFSF6), mRNA.                                                                                               |
| NM_001283.2 | AP1S1     | Homo sapiens adaptor-related protein complex 1, sigma 1 subunit (AP1S1), transcript variant 1, mRNA.                                                             |
| NM_016355.3 | DDX47     | Homo sapiens DEAD (Asp-Glu-Ala-Asp) box polypeptide 47 (DDX47), transcript variant 1, mRNA.                                                                      |
| NM_004130.2 | GYG       | Homo sapiens glycogenin (GYG), mRNA.                                                                                                                             |
| NM_007280.1 | OIP5      | Homo sapiens Opa-interacting protein 5 (OIP5), mRNA.                                                                                                             |
| NM_018321.2 | BRIX      | Homo sapiens BRIX (BRIX), mRNA.                                                                                                                                  |
| NM_006496.1 | GNAI3     | Homo sapiens guanine nucleotide binding protein (G protein), alpha inhibiting activity polypeptide 3 (GNAI3), mRNA.                                              |
| NM_012106.3 | ARL2BP    | Homo sapiens ADP-ribosylation factor-like 2 binding protein (ARL2BP), mRNA.                                                                                      |
| NM_007080.1 | LSM6      | Homo sapiens LSM6 homolog, U6 small nuclear RNA associated (S. cerevisiae) (LSM6), mRNA.                                                                         |
| NM_000788.1 | DCK       | Homo sapiens deoxycytidine kinase (DCK), mRNA.                                                                                                                   |
| NM_024055.2 | SLC30A5   | Homo sapiens solute carrier family 30 (zinc transporter), member 5 (SLC30A5), mRNA.                                                                              |
| NM_182678.1 | UBE2E3    | Homo sapiens ubiquitin-conjugating enzyme E2E 3 (UBC4/5 homolog, yeast) (UBE2E3), transcript variant 2, mRNA.                                                    |
| NM_002092.1 | GRSF1     | Homo sapiens G-rich RNA sequence binding factor 1 (GRSF1), mRNA.                                                                                                 |
| NM_014051.2 | TMEM14A   | Homo sapiens transmembrane protein 14A (TMEM14A), mRNA.                                                                                                          |
| NM_007099.2 | ACP1      | Homo sapiens acid phosphatase 1, soluble (ACP1), transcript variant 2, mRNA.                                                                                     |
| NM_002492.2 | NDUFB5    | Homo sapiens NADH dehydrogenase (ubiquinone) 1 beta subcomplex, 5, 16kDa (NDUFB5), nuclear gene encoding mitochondrial protein, mRNA.                            |
| NM_177989.1 | BAF53A    | Homo sapiens BAF53 (BAF53A), transcript variant 2, mRNA.                                                                                                         |
| NM_018369.1 | XTP1      | Homo sapiens HBxAg transactivated protein 1 (XTP1), mRNA.                                                                                                        |
| NM_013995.1 | LAMP2     | Homo sapiens lysosomal-associated membrane protein 2 (LAMP2), transcript variant LAMP2B, mRNA.                                                                   |
| NM_022736.1 | FLJ14153  | Homo sapiens hypothetical protein FLJ14153 (FLJ14153), mRNA.                                                                                                     |
| NM_017927.2 | MFN1      | Homo sapiens mitofusin 1 (MFN1), nuclear gene encoding mitochondrial protein, transcript variant 2, mRNA.                                                        |
| NM_015984.1 | UCHL5     | Homo sapiens ubiquitin carboxyl-terminal hydrolase L5 (UCHL5), mRNA.                                                                                             |
| NM_002669.1 | PLRG1     | Homo sapiens pleiotropic regulator 1 (PRL1homolog, Arabidopsis) (PLRG1), mRNA.                                                                                   |
| NM_022831.1 | FLJ12806  | Homo sapiens hypothetical protein FLJ12806 (FLJ12806), mRNA.                                                                                                     |
| XM_035825.4 | KIAA0143  | Homo sapiens KIAA0143 protein (KIAA0143), mRNA.                                                                                                                  |
| NM_003729.1 | RTCD1     | Homo sapiens RNA terminal phosphate cyclase domain 1 (RTCD1), mRNA.                                                                                              |
| NM_018475.2 | TPARL     | Homo sapiens TPA regulated locus (TPARL), mRNA.                                                                                                                  |
| NM_182715.1 | SYPL      | Homo sapiens synaptophysin-like protein (SYPL), transcript variant 2, mRNA.                                                                                      |
| NM_018343.1 | RIOK2     | Homo sapiens RIO kinase 2 (yeast) (RIOK2), mRNA.                                                                                                                 |
| NM_181762.1 | UBE2A     | Homo sapiens ubiquitin-conjugating enzyme E2A (RAD6 homolog) (UBE2A), transcript variant 2, mRNA.                                                                |
| NM_016127.4 | MGC8721   | Homo sapiens hypothetical protein MGC8721 (MGC8721), mRNA.                                                                                                       |
| NM_145808.1 | MTPN      | Homo sapiens myotrophin (MTPN), mRNA.                                                                                                                            |
| NM_006007.1 | ZNF216    | Homo sapiens zinc finger protein 216 (ZNF216), mRNA.                                                                                                             |
| NM_003797.2 | EED       | Homo sapiens embryonic ectoderm development (EED), transcript variant 1, mRNA.                                                                                   |
| NM_052849.2 | MGC20481  | Homo sapiens hypothetical protein MGC20481 (MGC20481), mRNA.                                                                                                     |
| NM_000183.1 | HADHB     | Homo sapiens hydroxyacyl-Coenzyme A dehydrogenase/3-ketoacyl-Coenzyme A thiolase/enoyl-Coenzyme A hydratase (trifunctional protein), beta subunit (HADHB), mRNA. |
| NM_006353.2 | HMGN4     | Homo sapiens high mobility group nucleosomal binding domain 4 (HMGN4), mRNA.                                                                                     |
| NM_005899.2 | M17S2     | Homo sapiens membrane component, chromosome 17, surface marker 2 (ovarian carcinoma antigen CA125) (M17S2), transcript variant 1, mRNA.                          |
| NM_021994.1 | ZNF277    | Homo sapiens zinc finger protein (C2H2 type) 277 (ZNF277), mRNA.                                                                                                 |
| XM_351798.1 | LOC375693 | Homo sapiens similar to Selenoprotein T (LOC375693), mRNA.                                                                                                       |
| NM_025147.2 | FLJ13448  | Homo sapiens hypothetical protein FLJ13448 (FLJ13448), mRNA.                                                                                                     |
| NM_004688.1 | NMI       | Homo sapiens N-myc (and STAT) interactor (NMI), mRNA.                                                                                                            |
| NM_001634.3 | AMD1      | Homo sapiens adenosylmethionine decarboxylase 1 (AMD1), mRNA.                                                                                                    |
| NM_153374.1 | MGC35274  | Homo sapiens hypothetical protein MGC35274 (MGC35274), mRNA.                                                                                                     |

|             |               |                                                                                                                      |
|-------------|---------------|----------------------------------------------------------------------------------------------------------------------|
| NM_206831.1 | DESR1         | Homo sapiens DESR1 protein (DESR1), mRNA.                                                                            |
| NM_006407.2 | JWA           | Homo sapiens cytoskeleton related vitamin A responsive protein (JWA), mRNA.                                          |
| NM_014462.1 | LSM1          | Homo sapiens LSM1 homolog, U6 small nuclear RNA associated (S. cerevisiae) (LSM1), mRNA.                             |
| NM_018233.2 | FLJ10826      | Homo sapiens hypothetical protein FLJ10826 (FLJ10826), mRNA.                                                         |
| NM_018323.2 | PI4K2B        | Homo sapiens phosphatidylinositol 4-kinase type-II beta (PI4K2B), mRNA.                                              |
| NM_004161.3 | RAB1A         | Homo sapiens RAB1A, member RAS oncogene family (RAB1A), mRNA.                                                        |
| NM_024570.1 | FLJ11712      | Homo sapiens hypothetical protein FLJ11712 (FLJ11712), mRNA.                                                         |
| NM_002486.2 | NCBP1         | Homo sapiens nuclear cap binding protein subunit 1, 80kDa (NCBP1), mRNA.                                             |
| NM_004985.3 | KRAS2         | Homo sapiens v-Ki-ras2 Kirsten rat sarcoma 2 viral oncogene homolog (KRAS2), transcript variant b, mRNA.             |
| NM_006292.2 | TSG101        | Homo sapiens tumor susceptibility gene 101 (TSG101), mRNA.                                                           |
| NM_025238.1 | BTBD1         | Homo sapiens BTB (POZ) domain containing 1 (BTBD1), mRNA.                                                            |
| NM_139207.1 | NAP1L1        | Homo sapiens nucleosome assembly protein 1-like 1 (NAP1L1), transcript variant 1, mRNA.                              |
| NM_024838.3 | FLJ22002      | Homo sapiens hypothetical protein FLJ22002 (FLJ22002), mRNA.                                                         |
| NM_145169.1 | C6orf83       | Homo sapiens chromosome 6 open reading frame 83 (C6orf83), mRNA.                                                     |
| NM_001237.2 | CCNA2         | Homo sapiens cyclin A2 (CCNA2), mRNA.                                                                                |
| NM_017746.1 | TEX10         | Homo sapiens testis expressed gene 10 (TEX10), mRNA.                                                                 |
| NM_007026.1 | DUSP14        | Homo sapiens dual specificity phosphatase 14 (DUSP14), mRNA.                                                         |
| NM_153226.1 | TMEM20        | Homo sapiens transmembrane protein 20 (TMEM20), mRNA.                                                                |
| NM_001745.2 | CAMLG         | Homo sapiens calcium modulating ligand (CAMLG), mRNA.                                                                |
| NM_015475.1 | DKFZP564F0522 | Homo sapiens DKFZP564F0522 protein (DKFZP564F0522), mRNA.                                                            |
| NM_005339.3 | HIP2          | Homo sapiens huntingtin interacting protein 2 (HIP2), mRNA.                                                          |
| NM_014445.2 | SERP1         | Homo sapiens stress-associated endoplasmic reticulum protein 1 (SERP1), mRNA.                                        |
| NM_005274.1 | GNG5          | Homo sapiens guanine nucleotide binding protein (G protein), gamma 5 (GNG5), mRNA.                                   |
| NM_003642.1 | HAT1          | Homo sapiens histone acetyltransferase 1 (HAT1), mRNA.                                                               |
| NM_016103.2 | SARA2         | Homo sapiens SAR1a gene homolog 2 (S. cerevisiae) (SARA2), mRNA.                                                     |
| NM_016301.2 | MGC14560      | Homo sapiens protein x 0004 (MGC14560), mRNA.                                                                        |
| NM_002787.3 | PSMA2         | Homo sapiens proteasome (prosome, macropain) subunit, alpha type, 2 (PSMA2), mRNA.                                   |
| NM_181836.3 | CGI-109       | Homo sapiens CGI-109 protein (CGI-109), mRNA.                                                                        |
| NM_002074.2 | GNB1          | Homo sapiens guanine nucleotide binding protein (G protein), beta polypeptide 1 (GNB1), mRNA.                        |
| NM_020143.2 | LOC56902      | Homo sapiens putative 28 kDa protein (LOC56902), mRNA.                                                               |
| NM_024104.2 | MGC2747       | Homo sapiens hypothetical protein MGC2747 (MGC2747), mRNA.                                                           |
| NM_032985.2 | SEC23B        | Homo sapiens Sec23 homolog B (S. cerevisiae) (SEC23B), transcript variant 2, mRNA.                                   |
| NM_006947.2 | SRP72         | Homo sapiens signal recognition particle 72kDa (SRP72), mRNA.                                                        |
| NM_002128.3 | HMGB1         | Homo sapiens high-mobility group box 1 (HMGB1), mRNA.                                                                |
| NM_032906.2 | MGC14156      | Homo sapiens hypothetical protein MGC14156 (MGC14156), mRNA.                                                         |
| NM_016570.1 | PTX1          | Homo sapiens PTX1 protein (PTX1), mRNA.                                                                              |
| NM_013233.1 | STK39         | Homo sapiens serine threonine kinase 39 (STE20/SPS1 homolog, yeast) (STK39), mRNA.                                   |
| NM_032025.1 | eIF2A         | Homo sapiens eukaryotic translation initiation factor (eIF) 2A (eIF2A), mRNA.                                        |
| NM_004523.2 | KIF11         | Homo sapiens kinesin family member 11 (KIF11), mRNA.                                                                 |
| NM_020726.1 | NLN           | Homo sapiens neurolysin (metallopeptidase M3 family) (NLN), mRNA.                                                    |
| NM_138391.3 | C1orf37       | Homo sapiens chromosome 1 open reading frame 37 (C1orf37), mRNA.                                                     |
| NM_018840.2 | C20orf24      | Homo sapiens chromosome 20 open reading frame 24 (C20orf24), transcript variant 1, mRNA.                             |
| NM_004060.3 | CCNG1         | Homo sapiens cyclin G1 (CCNG1), transcript variant 1, mRNA.                                                          |
| NM_006888.2 | CALM1         | Homo sapiens calmodulin 1 (phosphorylase kinase, delta) (CALM1), mRNA.                                               |
| NM_004298.2 | NUP155        | Homo sapiens nucleoporin 155kDa (NUP155), transcript variant 2, mRNA.                                                |
| NM_005898.3 | M11S1         | Homo sapiens membrane component, chromosome 11, surface marker 1 (M11S1), transcript variant 1, mRNA.                |
| NM_005032.3 | PLS3          | Homo sapiens plastin 3 (T isoform) (PLS3), mRNA.                                                                     |
| NM_014028.2 | OSTM1         | Homo sapiens osteopetrosis associated transmembrane protein 1 (OSTM1), mRNA.                                         |
| NM_024699.1 | FLJ14007      | Homo sapiens hypothetical protein FLJ14007 (FLJ14007), mRNA.                                                         |
| NM_018448.2 | TIP120A       | Homo sapiens TBP-interacting protein (TIP120A), mRNA.                                                                |
| NM_031208.1 | DKFZP566J2046 | Homo sapiens hypothetical protein DKFZp566J2046 (DKFZP566J2046), mRNA.                                               |
| NM_005625.1 | SDCBP         | Homo sapiens syndecan binding protein (syntenin) (SDCBP), mRNA.                                                      |
| NM_004879.2 | EI24          | Homo sapiens etoposide induced 2.4 mRNA (EI24), mRNA.                                                                |
| NM_004156.1 | PPP2CB        | Homo sapiens protein phosphatase 2 (formerly 2A), catalytic subunit, beta isoform (PPP2CB), mRNA.                    |
| NM_019053.2 | SEC15L1       | Homo sapiens SEC15-like 1 (S. cerevisiae) (SEC15L1), mRNA.                                                           |
| NM_005180.5 | BMI1          | Homo sapiens B lymphoma Mo-MLV insertion region (mouse) (BMI1), mRNA.                                                |
| NM_006710.4 | COPS8         | Homo sapiens COP9 constitutive photomorphogenic homolog subunit 8 (Arabidopsis) (COPS8), transcript variant 1, mRNA. |
| NM_005999.2 | TSNAX         | Homo sapiens translin-associated factor X (TSNAX), mRNA.                                                             |
| NM_001537.1 | HSBP1         | Homo sapiens heat shock factor binding protein 1 (HSBP1), mRNA.                                                      |
| NM_016097.2 | HSPC039       | Homo sapiens HSPC039 protein (HSPC039), mRNA.                                                                        |

|             |           |                                                                                                                                                 |
|-------------|-----------|-------------------------------------------------------------------------------------------------------------------------------------------------|
| NM_032436.1 | C13orf8   | Homo sapiens chromosome 13 open reading frame 8 (C13orf8), mRNA.                                                                                |
| NM_001791.2 | CDC42     | Homo sapiens cell division cycle 42 (GTP binding protein, 25kDa) (CDC42), transcript variant 1, mRNA.                                           |
| NM_019048.1 | NS3TP1    | Homo sapiens HCV NS3-transactivated protein 1 (NS3TP1), mRNA.                                                                                   |
| NM_016021.2 | UBE2J1    | Homo sapiens ubiquitin-conjugating enzyme E2, J1 (UBC6 homolog, yeast) (UBE2J1), mRNA.                                                          |
| NM_003276.1 | TMPO      | Homo sapiens thymopoietin (TMPO), mRNA.                                                                                                         |
| NM_000696.2 | ALDH9A1   | Homo sapiens aldehyde dehydrogenase 9 family, member A1 (ALDH9A1), mRNA.                                                                        |
| XM_068864.5 | LOC134478 | Homo sapiens similar to cytoplasmic beta-actin (LOC134478), mRNA.                                                                               |
| NM_014393.1 | STAU2     | Homo sapiens staufen, RNA binding protein, homolog 2 (Drosophila) (STAU2), mRNA.                                                                |
| NM_018290.1 | PGM2      | Homo sapiens phosphoglucomutase 2 (PGM2), mRNA.                                                                                                 |
| NM_006395.1 | APG7L     | Homo sapiens APG7 autophagy 7-like (S. cerevisiae) (APG7L), mRNA.                                                                               |
| NM_006570.3 | RRAGA     | Homo sapiens Ras-related GTP binding A (RRAGA), mRNA.                                                                                           |
| NM_004261.3 | SEP15     | Homo sapiens 15 kDa selenoprotein (SEP15), transcript variant 1, mRNA.                                                                          |
| NM_001494.2 | GDI2      | Homo sapiens GDP dissociation inhibitor 2 (GDI2), mRNA.                                                                                         |
| NM_003932.3 | ST13      | Homo sapiens suppression of tumorigenicity 13 (colon carcinoma) (Hsp70 interacting protein) (ST13), mRNA.                                       |
| NM_173510.1 | FLJ33814  | Homo sapiens hypothetical protein FLJ33814 (FLJ33814), mRNA.                                                                                    |
| NM_013444.2 | UBQLN2    | Homo sapiens ubiquilin 2 (UBQLN2), mRNA.                                                                                                        |
| NM_177924.1 | ASAH1     | Homo sapiens N-acylsphingosine amidohydrolase (acid ceramidase) 1 (ASAH1), transcript variant 1, mRNA.                                          |
| NM_001514.2 | GTF2B     | Homo sapiens general transcription factor IIB (GTF2B), mRNA.                                                                                    |
| NM_016245.1 | DHRS8     | Homo sapiens dehydrogenase/reductase (SDR family) member 8 (DHRS8), mRNA.                                                                       |
| NM_032574.1 | LOC84661  | Homo sapiens dpy-30-like protein (LOC84661), mRNA.                                                                                              |
| NM_002634.2 | PHB       | Homo sapiens prohibitin (PHB), mRNA.                                                                                                            |
| NM_014056.1 | HIG1      | Homo sapiens likely ortholog of mouse hypoxia induced gene 1 (HIG1), mRNA.                                                                      |
| NM_002865.1 | RAB2      | Homo sapiens RAB2, member RAS oncogene family (RAB2), mRNA.                                                                                     |
| NM_015937.2 | PIGT      | Homo sapiens phosphatidylinositol glycan, class T (PIGT), mRNA.                                                                                 |
| NM_003463.2 | PTP4A1    | Homo sapiens protein tyrosine phosphatase type IVA, member 1 (PTP4A1), mRNA.                                                                    |
| NM_014735.2 | PHF16     | Homo sapiens PHD finger protein 16 (PHF16), mRNA.                                                                                               |
| NM_003875.1 | GMPS      | Homo sapiens guanine monophosphate synthetase (GMPS), mRNA.                                                                                     |
| NM_004800.1 | TM9SF2    | Homo sapiens transmembrane 9 superfamily member 2 (TM9SF2), mRNA.                                                                               |
| NM_003368.3 | USP1      | Homo sapiens ubiquitin specific protease 1 (USP1), mRNA.                                                                                        |
| NM_014752.1 | KIAA0102  | Homo sapiens KIAA0102 gene product (KIAA0102), mRNA.                                                                                            |
| NM_015530.3 | GORASP2   | Homo sapiens golgi reassembly stacking protein 2, 55kDa (GORASP2), mRNA.                                                                        |
| NM_130838.1 | UBE3A     | Homo sapiens ubiquitin protein ligase E3A (human papilloma virus E6-associated protein, Angelman syndrome) (UBE3A), transcript variant 1, mRNA. |
| NM_020234.3 | MDS009    | Homo sapiens x 009 protein (MDS009), mRNA.                                                                                                      |
| NM_003129.2 | SQLE      | Homo sapiens squalene epoxidase (SQLE), mRNA.                                                                                                   |
| NM_138285.2 | LOC129401 | Homo sapiens mitotic phosphoprotein 44 (LOC129401), mRNA.                                                                                       |
| NM_152594.1 | SPRED1    | Homo sapiens sprouty-related, EVH1 domain containing 1 (SPRED1), mRNA.                                                                          |
| NM_018686.3 | CMAS      | Homo sapiens cytidine monophosphate N-acetylneuraminic acid synthetase (CMAS), mRNA.                                                            |
| NM_032303.2 | C9orf99   | Homo sapiens chromosome 9 open reading frame 99 (C9orf99), mRNA.                                                                                |
| NM_004279.1 | PMPCB     | Homo sapiens peptidase (mitochondrial processing) beta (PMPCB), mRNA.                                                                           |
| NM_002577.2 | PAK2      | Homo sapiens p21 (CDKN1A)-activated kinase 2 (PAK2), mRNA.                                                                                      |
| NM_001122.2 | ADFP      | Homo sapiens adipose differentiation-related protein (ADFP), mRNA.                                                                              |
| NM_031361.1 | COL4A3BP  | Homo sapiens collagen, type IV, alpha 3 (Goodpasture antigen) binding protein (COL4A3BP), transcript variant 2, mRNA.                           |
| NM_014846.2 | KIAA0196  | Homo sapiens KIAA0196 gene product (KIAA0196), mRNA.                                                                                            |
| NM_014888.1 | FAM3C     | Homo sapiens family with sequence similarity 3, member C (FAM3C), mRNA.                                                                         |
| NM_022745.1 | ATPAF1    | Homo sapiens ATP synthase mitochondrial F1 complex assembly factor 1 (ATPAF1), mRNA.                                                            |
| NM_032102.1 | SRP46     | Homo sapiens Splicing factor, arginine/serine-rich, 46kD (SRP46), mRNA.                                                                         |
| NM_001516.3 | GTF2H3    | Homo sapiens general transcription factor IIH, polypeptide 3, 34kDa (GTF2H3), mRNA.                                                             |
| NM_002940.1 | ABCE1     | Homo sapiens ATP-binding cassette, sub-family E (OABP), member 1 (ABCE1), mRNA.                                                                 |
| NM_018975.1 | TERF2IP   | Homo sapiens telomeric repeat binding factor 2, interacting protein (TERF2IP), mRNA.                                                            |
| NM_018948.2 | MIG-6     | Homo sapiens mitogen-inducible gene 6 (MIG-6), mRNA.                                                                                            |
| NM_012434.3 | SLC17A5   | Homo sapiens solute carrier family 17 (anion/sugar transporter), member 5 (SLC17A5), mRNA.                                                      |
| NM_018255.1 | STATIP1   | Homo sapiens signal transducer and activator of transcription 3 interacting protein 1 (STATIP1), mRNA.                                          |
| NM_024613.2 | PLEKHF2   | Homo sapiens pleckstrin homology domain containing, family F (with FYVE domain) member 2 (PLEKHF2), mRNA.                                       |
| NM_032519.2 | C6orf200  | Homo sapiens chromosome 6 open reading frame 200 (C6orf200), mRNA.                                                                              |
| XM_351675.1 | PRO2013   | Homo sapiens hypothetical protein PRO2013 (PRO2013), mRNA.                                                                                      |
| NM_032312.2 | MGC11061  | Homo sapiens hypothetical protein MGC11061 (MGC11061), mRNA.                                                                                    |
| NM_138386.1 | LOC92345  | Homo sapiens hypothetical protein BC008207 (LOC92345), mRNA.                                                                                    |
| NM_016099.1 | GOLGA7    | Homo sapiens golgi autoantigen, golgin subfamily a, 7 (GOLGA7), mRNA.                                                                           |
| NM_020244.1 | CHPT1     | Homo sapiens choline phosphotransferase 1 (CHPT1), mRNA.                                                                                        |
| NM_078468.1 | BCCIP     | Homo sapiens BRCA2 and CDKN1A interacting protein (BCCIP), transcript variant B, mRNA.                                                          |

|             |               |                                                                                                                                    |
|-------------|---------------|------------------------------------------------------------------------------------------------------------------------------------|
| NM_152227.1 | SNX5          | Homo sapiens sorting nexin 5 (SNX5), transcript variant 1, mRNA.                                                                   |
| NM_000318.1 | PXMP3         | Homo sapiens peroxisomal membrane protein 3, 35kDa (Zellweger syndrome) (PXMP3), mRNA.                                             |
| NM_005389.1 | PCMT1         | Homo sapiens protein-L-isoaspartate (D-aspartate) O-methyltransferase (PCMT1), mRNA.                                               |
| NM_181558.1 | RFC3          | Homo sapiens replication factor C (activator 1) 3, 38kDa (RFC3), transcript variant 2, mRNA.                                       |
| NM_017896.2 | C20orf11      | Homo sapiens chromosome 20 open reading frame 11 (C20orf11), mRNA.                                                                 |
| NM_004504.3 | HRB           | Homo sapiens HIV-1 Rev binding protein (HRB), mRNA.                                                                                |
| NM_001358.1 | DHX15         | Homo sapiens DEAH (Asp-Glu-Ala-His) box polypeptide 15 (DHX15), mRNA.                                                              |
| NM_015959.1 | TMX2          | Homo sapiens thioredoxin-related transmembrane protein 2 (TMX2), mRNA.                                                             |
| NM_012333.2 | MYCBP         | Homo sapiens c-myc binding protein (MYCBP), mRNA.                                                                                  |
| NM_016542.2 | MST4          | Homo sapiens Mst3 and SOK1-related kinase (MST4), mRNA.                                                                            |
| NM_019026.1 | LOC54499      | Homo sapiens putative membrane protein (LOC54499), mRNA.                                                                           |
| NM_005669.3 | DP1           | Homo sapiens polyosis locus protein 1 (DP1), mRNA.                                                                                 |
| NM_004927.2 | MRPL49        | Homo sapiens mitochondrial ribosomal protein L49 (MRPL49), nuclear gene encoding mitochondrial protein, mRNA.                      |
| NM_024039.1 | MIS12         | Homo sapiens homolog of yeast Mis12 (MIS12), mRNA.                                                                                 |
| NM_004096.3 | EIF4EBP2      | Homo sapiens eukaryotic translation initiation factor 4E binding protein 2 (EIF4EBP2), mRNA.                                       |
| NM_016655.2 | GABPB2        | Homo sapiens GA binding protein transcription factor, beta subunit 2, 47kDa (GABPB2), transcript variant gamma-2, mRNA.            |
| NM_022496.2 | ACTR6         | Homo sapiens actin-related protein 6 (ACTR6), mRNA.                                                                                |
| NM_006721.2 | ADK           | Homo sapiens adenosine kinase (ADK), transcript variant ADK-long, mRNA.                                                            |
| NM_006241.3 | PPP1R2        | Homo sapiens protein phosphatase 1, regulatory (inhibitor) subunit 2 (PPP1R2), mRNA.                                               |
| NM_019051.1 | MRPL50        | Homo sapiens mitochondrial ribosomal protein L50 (MRPL50), nuclear gene encoding mitochondrial protein, mRNA.                      |
| NM_019006.2 | AWP1          | Homo sapiens protein associated with PRK1 (AWP1), mRNA.                                                                            |
| NM_017998.1 | C9orf40       | Homo sapiens chromosome 9 open reading frame 40 (C9orf40), mRNA.                                                                   |
| NM_003848.1 | SUCLG2        | Homo sapiens succinate-CoA ligase, GDP-forming, beta subunit (SUCLG2), mRNA.                                                       |
| NM_005067.4 | SIAH2         | Homo sapiens seven in absentia homolog 2 (Drosophila) (SIAH2), mRNA.                                                               |
| NM_002748.2 | MAPK6         | Homo sapiens mitogen-activated protein kinase 6 (MAPK6), mRNA.                                                                     |
| NM_007266.1 | XAB1          | Homo sapiens XPA binding protein 1 (XAB1), mRNA.                                                                                   |
| NM_032390.3 | MKI67IP       | Homo sapiens MKI67 (FHA domain) interacting nucleolar phosphoprotein (MKI67IP), mRNA.                                              |
| NM_012297.3 | G3BP2         | Homo sapiens Ras-GTPase activating protein SH3 domain-binding protein 2 (G3BP2), transcript variant 2, mRNA.                       |
| NM_197973.1 | ALG2          | Homo sapiens asparagine-linked glycosylation 2 homolog (yeast, alpha-1,3-mannosyltransferase) (ALG2), transcript variant 2, mRNA.  |
| NM_002628.2 | PFN2          | Homo sapiens profilin 2 (PFN2), transcript variant 2, mRNA.                                                                        |
| NM_003756.1 | EIF3S3        | Homo sapiens eukaryotic translation initiation factor 3, subunit 3 gamma, 40kDa (EIF3S3), mRNA.                                    |
| NM_014666.2 | ENTH          | Homo sapiens enthoprotein (ENTH), mRNA.                                                                                            |
| NM_005229.2 | ELK1          | Homo sapiens ELK1, member of ETS oncogene family (ELK1), mRNA.                                                                     |
| NM_032027.2 | BBP           | Homo sapiens beta-amyloid binding protein precursor (BBP), mRNA.                                                                   |
| NM_000108.2 | DLD           | Homo sapiens dihydrolipoamide dehydrogenase (E3 component of pyruvate dehydrogenase complex, 2-oxo-glutarate complex, (DLD), mRNA. |
| NM_182790.1 | PBEF1         | Homo sapiens pre-B-cell colony enhancing factor 1 (PBEF1), transcript variant 2, mRNA.                                             |
| NM_002810.1 | PSMD4         | Homo sapiens proteasome (prosome, macropain) 26S subunit, non-ATPase, 4 (PSMD4), transcript variant 1, mRNA.                       |
| NM_012129.2 | CLDN12        | Homo sapiens claudin 12 (CLDN12), mRNA.                                                                                            |
| NM_080546.2 | CDW92         | Homo sapiens CDW92 antigen (CDW92), mRNA.                                                                                          |
| NM_015412.1 | DKFZP434F2021 | Homo sapiens DKFZP434F2021 protein (DKFZP434F2021), mRNA.                                                                          |
| NM_024551.2 | ADIPOR2       | Homo sapiens adiponectin receptor 2 (ADIPOR2), mRNA.                                                                               |
| NM_024045.1 | DDX50         | Homo sapiens DEAD (Asp-Glu-Ala-Asp) box polypeptide 50 (DDX50), mRNA.                                                              |
| NM_003418.1 | ZNF9          | Homo sapiens zinc finger protein 9 (a cellular retroviral nucleic acid binding protein) (ZNF9), mRNA.                              |
| NM_018204.2 | CKAP2         | Homo sapiens cytoskeleton associated protein 2 (CKAP2), mRNA.                                                                      |
| NM_006153.3 | NCK1          | Homo sapiens NCK adaptor protein 1 (NCK1), mRNA.                                                                                   |
| NM_003850.1 | SUCLA2        | Homo sapiens succinate-CoA ligase, ADP-forming, beta subunit (SUCLA2), mRNA.                                                       |
| XM_033371.3 | DKFZP564O092  | Homo sapiens DKFZP564O092 protein (DKFZP564O092), mRNA.                                                                            |
| NM_024740.1 | DIBD1         | Homo sapiens disrupted in bipolar affective disorder 1 (DIBD1), mRNA.                                                              |
| NM_016070.2 | MRPS23        | Homo sapiens mitochondrial ribosomal protein S23 (MRPS23), nuclear gene encoding mitochondrial protein, mRNA.                      |
| NM_000143.2 | FH            | Homo sapiens fumarate hydratase (FH), nuclear gene encoding mitochondrial protein, mRNA.                                           |
| NM_018571.4 | ALS2CR2       | Homo sapiens amyotrophic lateral sclerosis 2 (juvenile) chromosome region, candidate 2 (ALS2CR2), mRNA.                            |
| NM_152388.1 | ALS2CR4       | Homo sapiens amyotrophic lateral sclerosis 2 (juvenile) chromosome region, candidate 4 (ALS2CR4), mRNA.                            |
| NM_004779.4 | CNOT8         | Homo sapiens CCR4-NOT transcription complex, subunit 8 (CNOT8), mRNA.                                                              |
| NM_015423.2 | AASDHPPT      | Homo sapiens amino adipate-semialdehyde dehydrogenase-phosphopantetheinyl transferase (AASDHPPT), mRNA.                            |
| NM_006963.1 | ZNF22         | Homo sapiens zinc finger protein 22 (KOX 15) (ZNF22), mRNA.                                                                        |
| NM_005722.1 | ACTR2         | Homo sapiens ARP2 actin-related protein 2 homolog (yeast) (ACTR2), mRNA.                                                           |
| NM_003270.2 | TM4SF6        | Homo sapiens transmembrane 4 superfamily member 6 (TM4SF6), mRNA.                                                                  |
| NM_016072.2 | CGI-141       | Homo sapiens CGI-141 protein (CGI-141), mRNA.                                                                                      |
| NM_006320.1 | PGRMC2        | Homo sapiens progesterone receptor membrane component 2 (PGRMC2), mRNA.                                                            |
| NM_174907.1 | PPP4R2        | Homo sapiens protein phosphatase 4, regulatory subunit 2 (PPP4R2), mRNA.                                                           |

|             |              |                                                                                                                                     |
|-------------|--------------|-------------------------------------------------------------------------------------------------------------------------------------|
| NM_001695.2 | ATP6V1C1     | Homo sapiens ATPase, H+ transporting, lysosomal 42kDa, V1 subunit C, isoform 1 (ATP6V1C1), mRNA.                                    |
| NM_002703.3 | PPAT         | Homo sapiens phosphoribosyl pyrophosphate amidotransferase (PPAT), mRNA.                                                            |
| NM_018477.1 | ACTR10       | Homo sapiens actin-related protein 10 homolog (S. cerevisiae) (ACTR10), mRNA.                                                       |
| NM_152295.3 | TARS         | Homo sapiens threonyl-tRNA synthetase (TARS), mRNA.                                                                                 |
| NM_012243.1 | SLC35A3      | Homo sapiens solute carrier family 35 (UDP-N-acetylglucosamine (UDP-GlcNAc) transporter), member A3 (SLC35A3), mRNA.                |
| NM_138785.1 | C6orf72      | Homo sapiens chromosome 6 open reading frame 72 (C6orf72), mRNA.                                                                    |
| NM_002154.3 | HSPA4        | Homo sapiens heat shock 70kDa protein 4 (HSPA4), transcript variant 1, mRNA.                                                        |
| NM_003184.2 | TAF2         | Homo sapiens TAF2 RNA polymerase II, TATA box binding protein (TBP)-associated factor, 150kDa (TAF2), mRNA.                         |
| NM_006024.4 | TAX1BP1      | Homo sapiens Tax1 (human T-cell leukemia virus type I) binding protein 1 (TAX1BP1), mRNA.                                           |
| NM_003849.1 | SUCLG1       | Homo sapiens succinate-CoA ligase, GDP-forming, alpha subunit (SUCLG1), mRNA.                                                       |
| NM_015907.2 | LAP3         | Homo sapiens leucine aminopeptidase 3 (LAP3), mRNA.                                                                                 |
| NM_022157.2 | RRAGC        | Homo sapiens Ras-related GTP binding C (RRAGC), mRNA.                                                                               |
| NM_152857.1 | WTAP         | Homo sapiens Wilms tumor 1 associated protein (WTAP), transcript variant 2, mRNA.                                                   |
| NM_003473.2 | STAM         | Homo sapiens signal transducing adaptor molecule (SH3 domain and ITAM motif) 1 (STAM), mRNA.                                        |
| NM_024738.1 | FLJ21415     | Homo sapiens hypothetical protein FLJ21415 (FLJ21415), mRNA.                                                                        |
| NM_005749.2 | TOB1         | Homo sapiens transducer of ERBB2, 1 (TOB1), mRNA.                                                                                   |
| NM_032182.2 | KIAA0157     | Homo sapiens KIAA0157 (KIAA0157), mRNA.                                                                                             |
| NM_021927.1 | FLJ13220     | Homo sapiens hypothetical protein FLJ13220 (FLJ13220), mRNA.                                                                        |
| NM_003576.2 | STK24        | Homo sapiens serine/threonine kinase 24 (STE20 homolog, yeast) (STK24), mRNA.                                                       |
| NM_178579.1 | PSMF1        | Homo sapiens proteasome (prosome, macropain) inhibitor subunit 1 (PI31) (PSMF1), transcript variant 3, mRNA.                        |
| NM_004766.1 | COPB2        | Homo sapiens coatamer protein complex, subunit beta 2 (beta prime) (COPB2), mRNA.                                                   |
| NM_000671.2 | ADH5         | Homo sapiens alcohol dehydrogenase 5 (class III), chi polypeptide (ADH5), mRNA.                                                     |
| NM_078468.1 | BCCIP        | Homo sapiens BRCA2 and CDKN1A interacting protein (BCCIP), transcript variant B, mRNA.                                              |
| NM_001673.2 | ASNS         | Homo sapiens asparagine synthetase (ASNS), transcript variant 2, mRNA.                                                              |
| NM_012347.2 | FBXO9        | Homo sapiens F-box only protein 9 (FBXO9), transcript variant 1, mRNA.                                                              |
| NM_017446.2 | MRPL39       | Homo sapiens mitochondrial ribosomal protein L39 (MRPL39), nuclear gene encoding mitochondrial protein, transcript variant 1, mRNA. |
| NM_020841.3 | OSBPL8       | Homo sapiens oxysterol binding protein-like 8 (OSBPL8), mRNA.                                                                       |
| NM_018479.1 | ECHDC1       | Homo sapiens enoyl Coenzyme A hydratase domain containing 1 (ECHDC1), mRNA.                                                         |
| NM_007222.2 | ZHX1         | Homo sapiens zinc fingers and homeoboxes 1 (ZHX1), mRNA.                                                                            |
| NM_006246.2 | PPP2R5E      | Homo sapiens protein phosphatase 2, regulatory subunit B (B56), epsilon isoform (PPP2R5E), mRNA.                                    |
| NM_003477.1 | PDHX         | Homo sapiens pyruvate dehydrogenase complex, component X (PDHX), mRNA.                                                              |
| NM_019095.3 | C20orf155    | Homo sapiens chromosome 20 open reading frame 155 (C20orf155), mRNA.                                                                |
| NM_016468.3 | C14orf112    | Homo sapiens chromosome 14 open reading frame 112 (C14orf112), mRNA.                                                                |
| NM_021999.2 | ITM2B        | Homo sapiens integral membrane protein 2B (ITM2B), mRNA.                                                                            |
| NM_006055.1 | LANCL1       | Homo sapiens LanC lantibiotic synthetase component C-like 1 (bacterial) (LANCL1), mRNA.                                             |
| NM_013322.2 | SNX10        | Homo sapiens sorting nexin 10 (SNX10), mRNA.                                                                                        |
| NM_020199.1 | HTGN29       | Homo sapiens HTGN29 protein (HTGN29), mRNA.                                                                                         |
| NM_017426.2 | NUP54        | Homo sapiens nucleoporin 54kDa (NUP54), mRNA.                                                                                       |
| NM_024604.1 | FLJ21908     | Homo sapiens hypothetical protein FLJ21908 (FLJ21908), mRNA.                                                                        |
| NM_025234.1 | REC14        | Homo sapiens recombination protein REC14 (REC14), mRNA.                                                                             |
| NM_001731.1 | BTG1         | Homo sapiens B-cell translocation gene 1, anti-proliferative (BTG1), mRNA.                                                          |
| NM_003171.2 | SUPV3L1      | Homo sapiens suppressor of var1, 3-like 1 (S. cerevisiae) (SUPV3L1), mRNA.                                                          |
| NM_005536.2 | IMPA1        | Homo sapiens inositol(myo)-1(or 4)-monophosphatase 1 (IMPA1), mRNA.                                                                 |
| NM_018120.3 | FLJ10511     | Homo sapiens armadillo repeat containing protein (FLJ10511), mRNA.                                                                  |
| NM_014864.2 | FAM20B       | Homo sapiens family with sequence similarity 20, member B (FAM20B), mRNA.                                                           |
| NM_138730.1 | HMGN3        | Homo sapiens high mobility group nucleosomal binding domain 3 (HMGN3), transcript variant 2, mRNA.                                  |
| NM_032466.1 | ASPH         | Homo sapiens aspartate beta-hydroxylase (ASPH), transcript variant 3, mRNA.                                                         |
| NM_014248.2 | RBX1         | Homo sapiens ring-box 1 (RBX1), mRNA.                                                                                               |
| NM_022915.2 | MRPL44       | Homo sapiens mitochondrial ribosomal protein L44 (MRPL44), nuclear gene encoding mitochondrial protein, mRNA.                       |
| NM_015509.2 | DKFZP566B183 | Homo sapiens DKFZP566B183 protein (DKFZP566B183), mRNA.                                                                             |
| NM_002633.2 | PGM1         | Homo sapiens phosphoglucomutase 1 (PGM1), mRNA.                                                                                     |
| XM_086931.5 | LOC150498    | Homo sapiens similar to epsilon isoform of 14-3-3 protein (LOC150498), mRNA.                                                        |
| XM_291533.2 | LOC343363    | Homo sapiens similar to Transcription factor BTF3 (RNA polymerase B transcription factor 3) (LOC343363), mRNA.                      |
| NM_001677.2 | ATP1B1       | Homo sapiens ATPase, Na+/K+ transporting, beta 1 polypeptide (ATP1B1), mRNA.                                                        |
| NM_025196.2 | GRPEL1       | Homo sapiens GrpE-like 1, mitochondrial (E. coli) (GRPEL1), mRNA.                                                                   |
| NM_152329.3 | PPIL5        | Homo sapiens peptidylprolyl isomerase (cyclophilin) like 5 (PPIL5), transcript variant 1, mRNA.                                     |
| NM_032795.1 | FLJ14494     | Homo sapiens hypothetical protein FLJ14494 (FLJ14494), mRNA.                                                                        |
| NM_177525.1 | MEST         | Homo sapiens mesoderm specific transcript homolog (mouse) (MEST), transcript variant 3, mRNA.                                       |
| NM_006807.3 | CBX1         | Homo sapiens chromobox homolog 1 (HP1 beta homolog Drosophila ) (CBX1), mRNA.                                                       |
| NM_002869.4 | RAB6A        | Homo sapiens RAB6A, member RAS oncogene family (RAB6A), transcript variant 1, mRNA.                                                 |



|             |          |                                                                                                                                                               |
|-------------|----------|---------------------------------------------------------------------------------------------------------------------------------------------------------------|
| NM_018164.1 | FLJ10637 | Homo sapiens hypothetical protein FLJ10637 (FLJ10637), mRNA.                                                                                                  |
| NM_014236.1 | GNPAT    | Homo sapiens glyceronephosphate O-acyltransferase (GNPAT), mRNA.                                                                                              |
| NM_006986.2 | MAGED1   | Homo sapiens melanoma antigen, family D, 1 (MAGED1), mRNA.                                                                                                    |
| NM_019061.2 | PIP3AP   | Homo sapiens phosphatidylinositol-3-phosphate associated protein (PIP3AP), mRNA.                                                                              |
| NM_003100.2 | SNX2     | Homo sapiens sorting nexin 2 (SNX2), mRNA.                                                                                                                    |
| NM_021188.1 | ZNF410   | Homo sapiens zinc finger protein 410 (ZNF410), mRNA.                                                                                                          |
| NM_173797.2 | FLJ38499 | Homo sapiens hypothetical protein FLJ38499 (FLJ38499), mRNA.                                                                                                  |
| NM_005040.2 | PRCP     | Homo sapiens prolylcarboxypeptidase (angiotensinase C) (PRCP), transcript variant 1, mRNA.                                                                    |
| NM_015646.3 | RAP1B    | Homo sapiens RAP1B, member of RAS oncogene family (RAP1B), mRNA.                                                                                              |
| NM_005002.3 | NDUFA9   | Homo sapiens NADH dehydrogenase (ubiquinone) 1 alpha subcomplex, 9, 39kDa (NDUFA9), mRNA.                                                                     |
| NM_005607.3 | PTK2     | Homo sapiens PTK2 protein tyrosine kinase 2 (PTK2), transcript variant 2, mRNA.                                                                               |
| NM_000310.1 | PPT1     | Homo sapiens palmitoyl-protein thioesterase 1 (ceroid-lipofuscinosis, neuronal 1, infantile) (PPT1), mRNA.                                                    |
| NM_020123.2 | SMBP     | Homo sapiens SM-11044 binding protein (SMBP), mRNA.                                                                                                           |
| NM_004206.2 | SEC22L3  | Homo sapiens SEC22 vesicle trafficking protein-like 3 ( <i>S. cerevisiae</i> ) (SEC22L3), transcript variant 2, mRNA.                                         |
| NM_139313.1 | YME1L1   | Homo sapiens YME1-like 1 ( <i>S. cerevisiae</i> ) (YME1L1), nuclear gene encoding mitochondrial protein, transcript variant 2, mRNA.                          |
| NM_031453.2 | C10orf45 | Homo sapiens chromosome 10 open reading frame 45 (C10orf45), mRNA.                                                                                            |
| NM_016126.1 | LOC51668 | Homo sapiens HSPCO34 protein (LOC51668), mRNA.                                                                                                                |
| NM_001156.2 | ANXA7    | Homo sapiens annexin A7 (ANXA7), transcript variant 1, mRNA.                                                                                                  |
| NM_015599.1 | PGM3     | Homo sapiens phosphoglucomutase 3 (PGM3), mRNA.                                                                                                               |
| NM_016027.1 | LACTB2   | Homo sapiens lactamase, beta 2 (LACTB2), mRNA.                                                                                                                |
| NM_003676.2 | DEGS     | Homo sapiens degenerative spermatocyte homolog, lipid desaturase ( <i>Drosophila</i> ) (DEGS), transcript variant 1, mRNA.                                    |
| NM_005482.1 | PIGK     | Homo sapiens phosphatidylinositol glycan, class K (PIGK), mRNA.                                                                                               |
| NM_020300.3 | MGST1    | Homo sapiens microsomal glutathione S-transferase 1 (MGST1), transcript variant 1b, mRNA.                                                                     |
| NM_183376.1 | ARRDC4   | Homo sapiens arrestin domain containing 4 (ARRDC4), mRNA.                                                                                                     |
| NM_014252.1 | SLC25A15 | Homo sapiens solute carrier family 25 (mitochondrial carrier; ornithine transporter) member 15 (SLC25A15), nuclear gene encoding mitochondrial protein, mRNA. |
| NM_003144.2 | SSR1     | Homo sapiens signal sequence receptor, alpha (translocon-associated protein alpha) (SSR1), mRNA.                                                              |
| NM_078473.1 | BLP1     | Homo sapiens BBP-like protein 1 (BLP1), transcript variant 1, mRNA.                                                                                           |
| NM_016013.1 | NDUFAF1  | Homo sapiens NADH dehydrogenase (ubiquinone) 1 alpha subcomplex, assembly factor 1 (NDUFAF1), mRNA.                                                           |
| NM_014011.4 | SOCS5    | Homo sapiens suppressor of cytokine signaling 5 (SOCS5), transcript variant 1, mRNA.                                                                          |
| NM_012329.1 | MMD      | Homo sapiens monocyte to macrophage differentiation-associated (MMD), mRNA.                                                                                   |
| NM_016410.2 | C9orf83  | Homo sapiens chromosome 9 open reading frame 83 (C9orf83), mRNA.                                                                                              |
| NM_000235.1 | LIPA     | Homo sapiens lipase A, lysosomal acid, cholesterol esterase (Wolman disease) (LIPA), mRNA.                                                                    |
| NM_004685.2 | MTMR6    | Homo sapiens myotubularin related protein 6 (MTMR6), mRNA.                                                                                                    |
| NM_020236.2 | MRPL1    | Homo sapiens mitochondrial ribosomal protein L1 (MRPL1), nuclear gene encoding mitochondrial protein, mRNA.                                                   |
| NM_002874.2 | RAD23B   | Homo sapiens RAD23 homolog B ( <i>S. cerevisiae</i> ) (RAD23B), mRNA.                                                                                         |
| NM_003084.1 | SNAPC3   | Homo sapiens small nuclear RNA activating complex, polypeptide 3, 50kDa (SNAPC3), mRNA.                                                                       |
| NM_007043.5 | HRB2     | Homo sapiens HIV-1 rev binding protein 2 (HRB2), mRNA.                                                                                                        |
| NM_021824.1 | NIF3L1   | Homo sapiens NIF3 NGG1 interacting factor 3-like 1 ( <i>S. pombe</i> ) (NIF3L1), mRNA.                                                                        |
| NM_001253.2 | CDC5L    | Homo sapiens CDC5 cell division cycle 5-like ( <i>S. pombe</i> ) (CDC5L), mRNA.                                                                               |
| NM_001660.2 | ARF4     | Homo sapiens ADP-ribosylation factor 4 (ARF4), mRNA.                                                                                                          |
| NM_018103.3 | LRRC5    | Homo sapiens leucine rich repeat containing 5 (LRRC5), mRNA.                                                                                                  |
| NM_080392.1 | PTP4A2   | Homo sapiens protein tyrosine phosphatase type IVA, member 2 (PTP4A2), transcript variant 3, mRNA.                                                            |
| NM_003000.1 | SDHB     | Homo sapiens succinate dehydrogenase complex, subunit B, iron sulfur (lp) (SDHB), mRNA.                                                                       |
| NM_001550.1 | IFRD1    | Homo sapiens interferon-related developmental regulator 1 (IFRD1), mRNA.                                                                                      |
| NM_133646.1 | ZAK      | Homo sapiens sterile alpha motif and leucine zipper containing kinase AZK (ZAK), mRNA.                                                                        |
| NM_198402.2 | PTPLB    | Homo sapiens protein tyrosine phosphatase-like (proline instead of catalytic arginine), member b (PTPLB), mRNA.                                               |
| NM_030940.2 | HBLD2    | Homo sapiens HESB like domain containing 2 (HBLD2), mRNA.                                                                                                     |
| NM_003821.4 | RIPK2    | Homo sapiens receptor-interacting serine-threonine kinase 2 (RIPK2), mRNA.                                                                                    |
| NM_014373.1 | GPR160   | Homo sapiens G protein-coupled receptor 160 (GPR160), mRNA.                                                                                                   |
| NM_014335.2 | CR11     | Homo sapiens CREBBP/EP300 inhibitory protein 1 (CR11), mRNA.                                                                                                  |
| NM_005316.2 | GTF2H1   | Homo sapiens general transcription factor IIH, polypeptide 1 (62kD subunit) (GTF2H1), mRNA.                                                                   |
| NM_005402.2 | RALA     | Homo sapiens v-ral simian leukemia viral oncogene homolog A (ras related) (RALA), mRNA.                                                                       |
| NM_145060.1 | MGC10200 | Homo sapiens hypothetical protein MGC:10200 (MGC10200), mRNA.                                                                                                 |
| NM_005471.3 | GNPDA1   | Homo sapiens glucosamine-6-phosphate deaminase 1 (GNPDA1), mRNA.                                                                                              |
| NM_014168.1 | HSPC133  | Homo sapiens HSPC133 protein (HSPC133), mRNA.                                                                                                                 |
| NM_139169.3 | TRUB1    | Homo sapiens TruB pseudouridine (psi) synthase homolog 1 ( <i>E. coli</i> ) (TRUB1), mRNA.                                                                    |
| NM_018225.1 | SMU-1    | Homo sapiens homolog of <i>C. elegans</i> smu-1 (SMU-1), mRNA.                                                                                                |
| NM_012161.2 | FBXL5    | Homo sapiens F-box and leucine-rich repeat protein 5 (FBXL5), transcript variant 1, mRNA.                                                                     |
| NM_017945.2 | SLC35A5  | Homo sapiens solute carrier family 35, member A5 (SLC35A5), mRNA.                                                                                             |
| NM_018442.1 | PC326    | Homo sapiens PC326 protein (PC326), mRNA.                                                                                                                     |

|             |               |                                                                                                                                                             |
|-------------|---------------|-------------------------------------------------------------------------------------------------------------------------------------------------------------|
| XM_370653.2 | KIAA1826      | Homo sapiens KIAA1826 protein (KIAA1826), mRNA.                                                                                                             |
| NM_005033.1 | PMSCL1        | Homo sapiens polymyositis/scleroderma autoantigen 1, 75kDa (PMSCL1), mRNA.                                                                                  |
| NM_024079.2 | ALG8          | Homo sapiens asparagine-linked glycosylation 8 homolog (yeast, alpha-1,3-glucosyltransferase) (ALG8), mRNA.                                                 |
| NM_015294.1 | TRIM37        | Homo sapiens tripartite motif-containing 37 (TRIM37), mRNA.                                                                                                 |
| NM_006660.3 | CLPX          | Homo sapiens ClpX caseinolytic protease X homolog (E. coli) (CLPX), mRNA.                                                                                   |
| NM_004454.1 | ETV5          | Homo sapiens ets variant gene 5 (ets-related molecule) (ETV5), mRNA.                                                                                        |
| NM_198401.1 | LOC157567     | Homo sapiens hypothetical protein LOC157567 (LOC157567), mRNA.                                                                                              |
| NM_004376.3 | COX15         | Homo sapiens COX15 homolog, cytochrome c oxidase assembly protein (yeast) (COX15), nuclear gene encoding mitochondrial protein, transcript variant 2, mRNA. |
| NM_022451.9 | AD24          | Homo sapiens AD24 protein (AD24), mRNA.                                                                                                                     |
| NM_016503.2 | MRPL30        | Homo sapiens mitochondrial ribosomal protein L30 (MRPL30), nuclear gene encoding mitochondrial protein, transcript variant 2, mRNA.                         |
| NM_003663.2 | CGGBP1        | Homo sapiens CGG triplet repeat binding protein 1 (CGGBP1), mRNA.                                                                                           |
| NM_005342.1 | HMGB3         | Homo sapiens high-mobility group box 3 (HMGB3), mRNA.                                                                                                       |
| NM_014763.2 | MRPL19        | Homo sapiens mitochondrial ribosomal protein L19 (MRPL19), nuclear gene encoding mitochondrial protein, mRNA.                                               |
| NM_004344.1 | CETN2         | Homo sapiens centrin, EF-hand protein, 2 (CETN2), mRNA.                                                                                                     |
| NM_018230.2 | NUP133        | Homo sapiens nucleoporin 133kDa (NUP133), mRNA.                                                                                                             |
| NM_004300.2 | ACP1          | Homo sapiens acid phosphatase 1, soluble (ACP1), transcript variant 3, mRNA.                                                                                |
| NM_018149.3 | FLJ10587      | Homo sapiens hypothetical protein FLJ10587 (FLJ10587), mRNA.                                                                                                |
| NM_177560.1 | CSNK2A1       | Homo sapiens casein kinase 2, alpha 1 polypeptide (CSNK2A1), transcript variant 3, mRNA.                                                                    |
| NM_032286.1 | MGC5309       | Homo sapiens hypothetical protein MGC5309 (MGC5309), mRNA.                                                                                                  |
| NM_183323.1 | PAIP1         | Homo sapiens poly(A) binding protein interacting protein 1 (PAIP1), transcript variant 3, mRNA.                                                             |
| NM_015449.1 | NICE-3        | Homo sapiens NICE-3 protein (NICE-3), mRNA.                                                                                                                 |
| NM_014673.2 | KIAA0103      | Homo sapiens KIAA0103 (KIAA0103), mRNA.                                                                                                                     |
| NM_003831.2 | RIOK3         | Homo sapiens RIO kinase 3 (yeast) (RIOK3), transcript variant 1, mRNA.                                                                                      |
| XM_041162.3 | NDFIP2        | Homo sapiens Nedd4 family interacting protein 2 (NDFIP2), mRNA.                                                                                             |
| NM_014043.2 | DKFZP564O123  | Homo sapiens DKFZP564O123 protein (DKFZP564O123), mRNA.                                                                                                     |
| NM_017917.2 | C14orf10      | Homo sapiens chromosome 14 open reading frame 10 (C14orf10), mRNA.                                                                                          |
| NM_144609.1 | FLJ31795      | Homo sapiens hypothetical protein FLJ31795 (FLJ31795), mRNA.                                                                                                |
| NM_018427.2 | RRN3          | Homo sapiens RNA polymerase I transcription factor RRN3 (RRN3), mRNA.                                                                                       |
| NM_003390.2 | WEE1          | Homo sapiens WEE1 homolog (S. pombe) (WEE1), mRNA.                                                                                                          |
| NM_017866.3 | FLJ20533      | Homo sapiens hypothetical protein FLJ20533 (FLJ20533), mRNA.                                                                                                |
| NM_016048.1 | CGI-111       | Homo sapiens CGI-111 protein (CGI-111), mRNA.                                                                                                               |
| NM_018108.2 | C14orf130     | Homo sapiens chromosome 14 open reading frame 130 (C14orf130), mRNA.                                                                                        |
| NM_181555.1 | CKLFSF3       | Homo sapiens chemokine-like factor super family 3 (CKLFSF3), transcript variant 4, mRNA.                                                                    |
| NM_177988.1 | MRPL47        | Homo sapiens mitochondrial ribosomal protein L47 (MRPL47), nuclear gene encoding mitochondrial protein, transcript variant 2, mRNA.                         |
| NM_032840.1 | FLJ14800      | Homo sapiens hypothetical protein FLJ14800 (FLJ14800), mRNA.                                                                                                |
| NM_015344.1 | LEPROTL1      | Homo sapiens leptin receptor overlapping transcript-like 1 (LEPROTL1), mRNA.                                                                                |
| NM_018130.1 | FLJ10539      | Homo sapiens hypothetical protein FLJ10539 (FLJ10539), mRNA.                                                                                                |
| NM_015941.1 | ATP6V1H       | Homo sapiens ATPase, H+ transporting, lysosomal 50/57kD V1 subunit H (ATP6V1H), mRNA.                                                                       |
| NM_005805.2 | PSMD14        | Homo sapiens proteasome (prosome, macropain) 26S subunit, non-ATPase, 14 (PSMD14), mRNA.                                                                    |
| NM_030796.2 | DKFZP564K0822 | Homo sapiens hypothetical protein DKFZp564K0822 (DKFZP564K0822), mRNA.                                                                                      |
| NM_006838.2 | METAP2        | Homo sapiens methionyl aminopeptidase 2 (METAP2), mRNA.                                                                                                     |
| NM_014078.4 | MRPL13        | Homo sapiens mitochondrial ribosomal protein L13 (MRPL13), nuclear gene encoding mitochondrial protein, mRNA.                                               |
| NM_032758.2 | PHF5A         | Homo sapiens PHD finger protein 5A (PHF5A), mRNA.                                                                                                           |
| NM_007027.2 | TOPBP1        | Homo sapiens topoisomerase (DNA) II binding protein (TOPBP1), mRNA.                                                                                         |
| NM_016480.2 | PAIP2         | Homo sapiens poly(A) binding protein interacting protein 2 (PAIP2), mRNA.                                                                                   |
| NM_014814.1 | p44S10        | Homo sapiens proteasome regulatory particle subunit p44S10 (p44S10), mRNA.                                                                                  |
| NM_018362.2 | LIN7C         | Homo sapiens lin-7 homolog C (C. elegans) (LIN7C), mRNA.                                                                                                    |
| NM_015602.2 | LAP1B         | Homo sapiens lamina-associated polypeptide 1B (LAP1B), mRNA.                                                                                                |
| NM_006345.2 | SLC30A9       | Homo sapiens solute carrier family 30 (zinc transporter), member 9 (SLC30A9), mRNA.                                                                         |
| NM_002197.1 | ACO1          | Homo sapiens aconitase 1, soluble (ACO1), mRNA.                                                                                                             |
| NM_031905.2 | SVH           | Homo sapiens SVH protein (SVH), mRNA.                                                                                                                       |
| NM_152758.2 | FLJ31657      | Homo sapiens hypothetical protein FLJ31657 (FLJ31657), mRNA.                                                                                                |
| NM_020243.3 | TOMM22        | Homo sapiens translocase of outer mitochondrial membrane 22 homolog (yeast) (TOMM22), mRNA.                                                                 |
| NM_032991.1 | CASP3         | Homo sapiens caspase 3, apoptosis-related cysteine protease (CASP3), transcript variant beta, mRNA.                                                         |
| NM_002271.3 | KPNB3         | Homo sapiens karyopherin (importin) beta 3 (KPNB3), mRNA.                                                                                                   |
| NM_001806.2 | CEBPG         | Homo sapiens CCAAT/enhancer binding protein (C/EBP), gamma (CEBPG), mRNA.                                                                                   |
| NM_016004.1 | C20orf9       | Homo sapiens chromosome 20 open reading frame 9 (C20orf9), mRNA.                                                                                            |
| NM_005433.2 | YES1          | Homo sapiens v-yes-1 Yamaguchi sarcoma viral oncogene homolog 1 (YES1), mRNA.                                                                               |
| NM_203463.1 | LOC253782     | Homo sapiens hypothetical protein LOC253782 (LOC253782), mRNA.                                                                                              |
| NM_016299.1 | HSP70-4       | Homo sapiens likely ortholog of mouse heat shock protein, 70 kDa (HSP70-4), mRNA.                                                                           |

|             |               |                                                                                                                                                      |
|-------------|---------------|------------------------------------------------------------------------------------------------------------------------------------------------------|
| NM_004873.1 | BAG5          | Homo sapiens BCL2-associated athanogene 5 (BAG5), mRNA.                                                                                              |
| NM_017546.3 | C40           | Homo sapiens hypothetical protein C40 (C40), mRNA.                                                                                                   |
| NM_004282.2 | BAG2          | Homo sapiens BCL2-associated athanogene 2 (BAG2), mRNA.                                                                                              |
| XM_113743.4 | DKFZp313M0720 | Homo sapiens hypothetical protein DKFZp313M0720 (DKFZp313M0720), mRNA.                                                                               |
| NM_032124.3 | DKFZP564D1378 | Homo sapiens hypothetical protein DKFZp564D1378 (DKFZP564D1378), mRNA.                                                                               |
| XM_353706.1 | LOC378204     | Homo sapiens similar to amyotrophic lateral sclerosis 2 (juvenile) chromosome region, candidate 2; ILP-interacting protein ILPIPA (LOC378204), mRNA. |
| NM_006638.1 | RPP40         | Homo sapiens ribonuclease P 40kDa subunit (RPP40), mRNA.                                                                                             |
| NM_012479.2 | YWHAG         | Homo sapiens tyrosine 3-monooxygenase/tryptophan 5-monooxygenase activation protein, gamma polypeptide (YWHAG), mRNA.                                |
| NM_001859.2 | SLC31A1       | Homo sapiens solute carrier family 31 (copper transporters), member 1 (SLC31A1), mRNA.                                                               |
| NM_005637.1 | SS18          | Homo sapiens synovial sarcoma translocation, chromosome 18 (SS18), mRNA.                                                                             |
| NM_006837.2 | COPS5         | Homo sapiens COP9 constitutive photomorphogenic homolog subunit 5 (Arabidopsis) (COPS5), mRNA.                                                       |
| NM_017489.1 | TERF1         | Homo sapiens telomeric repeat binding factor (NIMA-interacting) 1 (TERF1), transcript variant 1, mRNA.                                               |
| NM_152437.1 | DKFZp761B128  | Homo sapiens hypothetical protein DKFZp761B128 (DKFZp761B128), mRNA.                                                                                 |
| NM_007006.1 | CPSF5         | Homo sapiens cleavage and polyadenylation specific factor 5, 25 kDa (CPSF5), mRNA.                                                                   |
| XM_290519.2 | KIAA1698      | Homo sapiens KIAA1698 protein (KIAA1698), mRNA.                                                                                                      |
| NM_002643.2 | PIGF          | Homo sapiens phosphatidylinositol glycan, class F (PIGF), transcript variant 1, mRNA.                                                                |
| NM_016500.3 | MGC874        | Homo sapiens hypothetical protein MGC874 (MGC874), mRNA.                                                                                             |
| NM_139279.2 | MCFD2         | Homo sapiens multiple coagulation factor deficiency 2 (MCFD2), mRNA.                                                                                 |
| NM_017656.1 | ZNF562        | Homo sapiens zinc finger protein 562 (ZNF562), mRNA.                                                                                                 |
| NM_006332.3 | IFI30         | Homo sapiens interferon, gamma-inducible protein 30 (IFI30), mRNA.                                                                                   |
| NM_016207.2 | CPSF3         | Homo sapiens cleavage and polyadenylation specific factor 3, 73kDa (CPSF3), mRNA.                                                                    |
| NM_015697.3 | CL640         | Homo sapiens hypothetical protein CL640 (CL640), mRNA.                                                                                               |
| NM_006406.1 | PRDX4         | Homo sapiens peroxiredoxin 4 (PRDX4), mRNA.                                                                                                          |
| NM_016283.3 | TAF9          | Homo sapiens TAF9 RNA polymerase II, TATA box binding protein (TBP)-associated factor, 32kDa (TAF9), transcript variant 2, mRNA.                     |
| NM_014929.2 | KIAA0971      | Homo sapiens KIAA0971 protein (KIAA0971), mRNA.                                                                                                      |
| XM_379396.1 | LOC221710     | Homo sapiens hypothetical protein LOC221710 (LOC221710), mRNA.                                                                                       |
| NM_006565.1 | CTCF          | Homo sapiens CCCTC-binding factor (zinc finger protein) (CTCF), mRNA.                                                                                |
| NM_016001.1 | CGI-48        | Homo sapiens CGI-48 protein (CGI-48), mRNA.                                                                                                          |
| NM_015508.2 | TIPARP        | Homo sapiens TCDD-inducible poly(ADP-ribose) polymerase (TIPARP), mRNA.                                                                              |
| NM_016451.3 | COPB          | Homo sapiens coatmer protein complex, subunit beta (COPB), mRNA.                                                                                     |
| NM_005887.1 | DLEU1         | Homo sapiens deleted in lymphocytic leukemia, 1 (DLEU1), mRNA.                                                                                       |
| NM_152261.1 | MGC17943      | Homo sapiens hypothetical protein MGC17943 (MGC17943), mRNA.                                                                                         |
| NM_022457.4 | COP1          | Homo sapiens constitutive photomorphogenic protein (COP1), mRNA.                                                                                     |
| NM_000676.2 | ADORA2B       | Homo sapiens adenosine A2b receptor (ADORA2B), mRNA.                                                                                                 |
| NM_004090.2 | DUSP3         | Homo sapiens dual specificity phosphatase 3 (vaccinia virus phosphatase VH1-related) (DUSP3), mRNA.                                                  |
| NM_018133.2 | FLJ10546      | Homo sapiens hypothetical protein FLJ10546 (FLJ10546), mRNA.                                                                                         |
| NM_014044.4 | UNC50         | Homo sapiens unc-50 homolog (C. elegans) (UNC50), mRNA.                                                                                              |
| XM_209490.3 | LOC285148     | Homo sapiens hypothetical protein LOC285148 (LOC285148), mRNA.                                                                                       |
| NM_138773.1 | LOC91137      | Homo sapiens hypothetical protein BC017169 (LOC91137), mRNA.                                                                                         |
| NM_018944.1 | C21orf45      | Homo sapiens chromosome 21 open reading frame 45 (C21orf45), mRNA.                                                                                   |
| NM_013438.3 | UBQLN1        | Homo sapiens ubiquilin 1 (UBQLN1), transcript variant 1, mRNA.                                                                                       |
| NM_016308.1 | UMP-CMPK      | Homo sapiens UMP-CMP kinase (UMP-CMPK), mRNA.                                                                                                        |
| NM_032637.2 | SKP2          | Homo sapiens S-phase kinase-associated protein 2 (p45) (SKP2), transcript variant 2, mRNA.                                                           |
| NM_003375.2 | VDAC2         | Homo sapiens voltage-dependent anion channel 2 (VDAC2), mRNA.                                                                                        |
| NM_000574.2 | DAF           | Homo sapiens decay accelerating factor for complement (CD55, Cromer blood group system) (DAF), mRNA.                                                 |
| NM_004094.3 | EIF2S1        | Homo sapiens eukaryotic translation initiation factor 2, subunit 1 alpha, 35kDa (EIF2S1), mRNA.                                                      |
| NM_001931.2 | DLAT          | Homo sapiens dihydrolipoamide S-acetyltransferase (E2 component of pyruvate dehydrogenase complex) (DLAT), mRNA.                                     |
| NM_003272.1 | TM7SF1        | Homo sapiens transmembrane 7 superfamily member 1 (upregulated in kidney) (TM7SF1), mRNA.                                                            |
| NM_052940.3 | MGC8974       | Homo sapiens hypothetical protein MGC8974 (MGC8974), mRNA.                                                                                           |
| NM_021132.1 | PPP3CB        | Homo sapiens protein phosphatase 3 (formerly 2B), catalytic subunit, beta isoform (calcineurin A beta) (PPP3CB), mRNA.                               |
| NM_138635.1 | H2AV          | Homo sapiens H2A histone family, member V (H2AV), transcript variant 2, mRNA.                                                                        |
| NM_007315.2 | STAT1         | Homo sapiens signal transducer and activator of transcription 1, 91kDa (STAT1), transcript variant alpha, mRNA.                                      |
| NM_002901.1 | RCN1          | Homo sapiens reticulocalbin 1, EF-hand calcium binding domain (RCN1), mRNA.                                                                          |
| NM_030969.2 | TMEM14B       | Homo sapiens transmembrane protein 14B (TMEM14B), mRNA.                                                                                              |
| NM_006190.3 | ORC2L         | Homo sapiens origin recognition complex, subunit 2-like (yeast) (ORC2L), mRNA.                                                                       |
| NM_007235.3 | XPOT          | Homo sapiens exportin, tRNA (nuclear export receptor for tRNAs) (XPOT), mRNA.                                                                        |
| NM_145648.1 | SLC15A4       | Homo sapiens solute carrier family 15, member 4 (SLC15A4), mRNA.                                                                                     |
| NM_004702.2 | CCNE2         | Homo sapiens cyclin E2 (CCNE2), transcript variant 3, mRNA.                                                                                          |
| NM_007146.1 | ZNF161        | Homo sapiens zinc finger protein 161 (ZNF161), mRNA.                                                                                                 |
| NM_033222.2 | PSIP1         | Homo sapiens PC4 and SFRS1 interacting protein 1 (PSIP1), mRNA.                                                                                      |

|             |               |                                                                                                                                               |
|-------------|---------------|-----------------------------------------------------------------------------------------------------------------------------------------------|
| NM_001814.2 | CTSC          | Homo sapiens cathepsin C (CTSC), transcript variant 1, mRNA.                                                                                  |
| NM_018569.2 | PRO0971       | Homo sapiens hypothetical protein PRO0971 (PRO0971), mRNA.                                                                                    |
| NM_178350.1 | WDFY1         | Homo sapiens WD repeat and FYVE domain containing 1 (WDFY1), transcript variant 2, mRNA.                                                      |
| NM_032839.1 | DIRC2         | Homo sapiens disrupted in renal carcinoma 2 (DIRC2), mRNA.                                                                                    |
| NM_024945.1 | C9orf76       | Homo sapiens chromosome 9 open reading frame 76 (C9orf76), mRNA.                                                                              |
| NM_006096.2 | NDRG1         | Homo sapiens N-myc downstream regulated gene 1 (NDRG1), mRNA.                                                                                 |
| NM_003479.2 | PTP4A2        | Homo sapiens protein tyrosine phosphatase type IVA, member 2 (PTP4A2), transcript variant 1, mRNA.                                            |
| NM_001274.2 | CHEK1         | Homo sapiens CHK1 checkpoint homolog (S. pombe) (CHEK1), mRNA.                                                                                |
| NM_001889.2 | CRYZ          | Homo sapiens crystallin, zeta (quinone reductase) (CRYZ), mRNA.                                                                               |
| NM_006463.3 | STAMPB        | Homo sapiens STAM binding protein (STAMPB), transcript variant 1, mRNA.                                                                       |
| NM_004889.1 | ATP5J2        | Homo sapiens ATP synthase, H+ transporting, mitochondrial F0 complex, subunit f, isoform 2 (ATP5J2), mRNA.                                    |
| NM_001423.1 | EMP1          | Homo sapiens epithelial membrane protein 1 (EMP1), mRNA.                                                                                      |
| NM_014254.1 | TMEM5         | Homo sapiens transmembrane protein 5 (TMEM5), mRNA.                                                                                           |
| NM_002139.1 | RBMX          | Homo sapiens RNA binding motif protein, X-linked (RBMX), mRNA.                                                                                |
| NM_016485.3 | C6orf55       | Homo sapiens chromosome 6 open reading frame 55 (C6orf55), mRNA.                                                                              |
| NM_014306.2 | HSPC117       | Homo sapiens hypothetical protein HSPC117 (HSPC117), mRNA.                                                                                    |
| NM_152945.1 | DRB1          | Homo sapiens developmentally regulated RNA-binding protein 1 (DRB1), mRNA.                                                                    |
| NM_006854.2 | KDELR2        | Homo sapiens KDEL (Lys-Asp-Glu-Leu) endoplasmic reticulum protein retention receptor 2 (KDELR2), mRNA.                                        |
| NM_032334.1 | MGC14595      | Homo sapiens hypothetical protein MGC14595 (MGC14595), mRNA.                                                                                  |
| NM_198197.1 | UBE1C         | Homo sapiens ubiquitin-activating enzyme E1C (UBA3 homolog, yeast) (UBE1C), transcript variant 3, mRNA.                                       |
| NM_024090.1 | ELOVL6        | Homo sapiens ELOVL family member 6, elongation of long chain fatty acids (FEN1/Elo2, SUR4/Elo3-like, yeast) (ELOVL6), mRNA.                   |
| NM_001483.1 | GBAS          | Homo sapiens glioblastoma amplified sequence (GBAS), mRNA.                                                                                    |
| NM_003811.2 | TNFSF9        | Homo sapiens tumor necrosis factor (ligand) superfamily, member 9 (TNFSF9), mRNA.                                                             |
| NM_012121.3 | CDC42EP4      | Homo sapiens CDC42 effector protein (Rho GTPase binding) 4 (CDC42EP4), mRNA.                                                                  |
| NM_003664.3 | AP3B1         | Homo sapiens adaptor-related protein complex 3, beta 1 subunit (AP3B1), mRNA.                                                                 |
| NM_017819.1 | RG9MTD1       | Homo sapiens RNA (guanine-9-) methyltransferase domain containing 1 (RG9MTD1), mRNA.                                                          |
| NM_006763.2 | BTG2          | Homo sapiens BTG family, member 2 (BTG2), mRNA.                                                                                               |
| NM_015459.2 | DKFZP564J0863 | Homo sapiens DKFZP564J0863 protein (DKFZP564J0863), mRNA.                                                                                     |
| NM_033103.3 | RHPN2         | Homo sapiens rhophilin, Rho GTPase binding protein 2 (RHPN2), mRNA.                                                                           |
| XM_290508.2 | LOC144097     | Homo sapiens hypothetical protein BC007540 (LOC144097), mRNA.                                                                                 |
| NM_006372.3 | SYNCRIP       | Homo sapiens synaptotagmin binding, cytoplasmic RNA interacting protein (SYNCRIP), mRNA.                                                      |
| NM_000067.1 | CA2           | Homo sapiens carbonic anhydrase II (CA2), mRNA.                                                                                               |
| NM_019094.3 | NUDT4         | Homo sapiens nudix (nucleoside diphosphate linked moiety X)-type motif 4 (NUDT4), transcript variant 1, mRNA.                                 |
| NM_024056.2 | MGC5576       | Homo sapiens hypothetical protein MGC5576 (MGC5576), mRNA.                                                                                    |
| NM_001681.2 | ATP2A2        | Homo sapiens ATPase, Ca++ transporting, cardiac muscle, slow twitch 2 (ATP2A2), transcript variant 2, mRNA.                                   |
| NM_014819.2 | PJA2          | Homo sapiens praja 2, RING-H2 motif containing (PJA2), mRNA.                                                                                  |
| NM_016551.1 | TM7SF3        | Homo sapiens transmembrane 7 superfamily member 3 (TM7SF3), mRNA.                                                                             |
| NM_178324.1 | SPTLC1        | Homo sapiens serine palmitoyltransferase, long chain base subunit 1 (SPTLC1), transcript variant 2, mRNA.                                     |
| NM_014278.2 | APG-1         | Homo sapiens heat shock protein (hsp110 family) (APG-1), mRNA.                                                                                |
| XM_378350.1 | LOC400027     | Homo sapiens hypothetical gene supported by BC047417 (LOC400027), mRNA.                                                                       |
| NM_181708.1 | LOC144233     | Homo sapiens hypothetical protein LOC144233 (LOC144233), mRNA.                                                                                |
| NM_181837.1 | ORC3L         | Homo sapiens origin recognition complex, subunit 3-like (yeast) (ORC3L), transcript variant 1, mRNA.                                          |
| NM_007240.1 | DUSP12        | Homo sapiens dual specificity phosphatase 12 (DUSP12), mRNA.                                                                                  |
| NM_032026.1 | CDA11         | Homo sapiens CDA11 protein (CDA11), mRNA.                                                                                                     |
| NM_004483.2 | GCSH          | Homo sapiens glycine cleavage system protein H (aminomethyl carrier) (GCSH), mRNA.                                                            |
| NM_025065.5 | RPF1          | Homo sapiens RNA processing factor 1 (RPF1), mRNA.                                                                                            |
| NM_003002.1 | SDHD          | Homo sapiens succinate dehydrogenase complex, subunit D, integral membrane protein (SDHD), nuclear gene encoding mitochondrial protein, mRNA. |
| NM_001034.1 | RRM2          | Homo sapiens ribonucleotide reductase M2 polypeptide (RRM2), mRNA.                                                                            |
| NM_024622.2 | FLJ21901      | Homo sapiens hypothetical protein FLJ21901 (FLJ21901), mRNA.                                                                                  |
| NM_006625.3 | FUSIP1        | Homo sapiens FUS interacting protein (serine-arginine rich) 1 (FUSIP1), transcript variant 1, mRNA.                                           |
| NM_152352.1 | MGC24180      | Homo sapiens hypothetical protein MGC24180 (MGC24180), mRNA.                                                                                  |
| NM_002834.3 | PTPN11        | Homo sapiens protein tyrosine phosphatase, non-receptor type 11 (Noonan syndrome 1) (PTPN11), mRNA.                                           |
| NM_006870.2 | DSTN          | Homo sapiens destrin (actin depolymerizing factor) (DSTN), mRNA.                                                                              |
| NM_002014.2 | FKBP4         | Homo sapiens FK506 binding protein 4, 59kDa (FKBP4), mRNA.                                                                                    |
| NM_002061.1 | GCLM          | Homo sapiens glutamate-cysteine ligase, modifier subunit (GCLM), mRNA.                                                                        |
| NM_020150.3 | SARA1         | Homo sapiens SAR1a gene homolog 1 (S. cerevisiae) (SARA1), mRNA.                                                                              |
| NM_033406.1 | FBXO3         | Homo sapiens F-box only protein 3 (FBXO3), transcript variant 2, mRNA.                                                                        |
| NM_005871.2 | SMNDC1        | Homo sapiens survival motor neuron domain containing 1 (SMNDC1), mRNA.                                                                        |
| NM_018844.1 | BCAP29        | Homo sapiens B-cell receptor-associated protein 29 (BCAP29), mRNA.                                                                            |
| NM_004462.2 | FDFT1         | Homo sapiens farnesyl-diphosphate farnesyltransferase 1 (FDFT1), mRNA.                                                                        |

|             |           |                                                                                                                                              |
|-------------|-----------|----------------------------------------------------------------------------------------------------------------------------------------------|
| NM_032632.2 | PAPOLA    | Homo sapiens poly(A) polymerase alpha (PAPOLA), mRNA.                                                                                        |
| NM_005721.3 | ACTR3     | Homo sapiens ARP3 actin-related protein 3 homolog (yeast) (ACTR3), mRNA.                                                                     |
| NM_173083.2 | TGS       | Homo sapiens TUDOR gene similar (TGS), mRNA.                                                                                                 |
| NM_021818.2 | SAV1      | Homo sapiens salvador homolog 1 (Drosophila) (SAV1), mRNA.                                                                                   |
| NM_016309.1 | LCMT1     | Homo sapiens leucine carboxyl methyltransferase 1 (LCMT1), mRNA.                                                                             |
| NM_002690.1 | POLB      | Homo sapiens polymerase (DNA directed), beta (POLB), mRNA.                                                                                   |
| NM_016125.2 | LOC51136  | Homo sapiens PTD016 protein (LOC51136), mRNA.                                                                                                |
| NM_016040.2 | CGI-100   | Homo sapiens CGI-100 protein (CGI-100), mRNA.                                                                                                |
| NM_004394.1 | DAP       | Homo sapiens death-associated protein (DAP), mRNA.                                                                                           |
| NM_174909.1 | MGC23909  | Homo sapiens hypothetical protein MGC23909 (MGC23909), mRNA.                                                                                 |
| NM_004846.1 | EIF4EL3   | Homo sapiens eukaryotic translation initiation factor 4E-like 3 (EIF4EL3), mRNA.                                                             |
| NM_006117.2 | PECI      | Homo sapiens peroxisomal D3,D2-enoyl-CoA isomerase (PECI), transcript variant 1, mRNA.                                                       |
| NM_012319.2 | SLC39A6   | Homo sapiens solute carrier family 39 (zinc transporter), member 6 (SLC39A6), mRNA.                                                          |
| NM_002755.2 | MAP2K1    | Homo sapiens mitogen-activated protein kinase kinase 1 (MAP2K1), mRNA.                                                                       |
| NM_003799.1 | RNMT      | Homo sapiens RNA (guanine-7-) methyltransferase (RNMT), mRNA.                                                                                |
| NM_004623.2 | TTC4      | Homo sapiens tetratricopeptide repeat domain 4 (TTC4), mRNA.                                                                                 |
| NM_003457.1 | ZNF207    | Homo sapiens zinc finger protein 207 (ZNF207), mRNA.                                                                                         |
| NM_018246.1 | FLJ10853  | Homo sapiens hypothetical protein FLJ10853 (FLJ10853), mRNA.                                                                                 |
| NM_002485.3 | NBS1      | Homo sapiens Nijmegen breakage syndrome 1 (nibrin) (NBS1), mRNA.                                                                             |
| NM_144578.2 | C14orf32  | Homo sapiens chromosome 14 open reading frame 32 (C14orf32), mRNA.                                                                           |
| NM_006106.2 | YAP1      | Homo sapiens Yes-associated protein 1, 65kDa (YAP1), mRNA.                                                                                   |
| NM_002767.2 | PRPSAP2   | Homo sapiens phosphoribosyl pyrophosphate synthetase-associated protein 2 (PRPSAP2), mRNA.                                                   |
| NM_003601.2 | SMARCA5   | Homo sapiens SWI/SNF related, matrix associated, actin dependent regulator of chromatin, subfamily a, member 5 (SMARCA5), mRNA.              |
| NM_024700.2 | SNIP1     | Homo sapiens Smad nuclear interacting protein (SNIP1), mRNA.                                                                                 |
| NM_014145.3 | C20orf30  | Homo sapiens chromosome 20 open reading frame 30 (C20orf30), mRNA.                                                                           |
| NM_020839.2 | KIAA1449  | Homo sapiens WD repeat endosomal protein (KIAA1449), mRNA.                                                                                   |
| NM_178003.1 | PPP2R4    | Homo sapiens protein phosphatase 2A, regulatory subunit B' (PR 53) (PPP2R4), transcript variant 5, mRNA.                                     |
| NM_006310.2 | NPEPPS    | Homo sapiens aminopeptidase puromycin sensitive (NPEPPS), mRNA.                                                                              |
| NM_015958.1 | CGI-30    | Homo sapiens CGI-30 protein (CGI-30), mRNA.                                                                                                  |
| NM_012383.3 | OSTF1     | Homo sapiens osteoclast stimulating factor 1 (OSTF1), mRNA.                                                                                  |
| NM_002863.2 | PYGL      | Homo sapiens phosphorylase, glycogen; liver (Hers disease, glycogen storage disease type VI) (PYGL), mRNA.                                   |
| NM_139242.2 | MtFMT     | Homo sapiens methionyl-tRNA formyltransferase, mitochondrial (MtFMT), mRNA.                                                                  |
| NM_005134.1 | PPP4R1    | Homo sapiens protein phosphatase 4, regulatory subunit 1 (PPP4R1), mRNA.                                                                     |
| NM_003930.3 | SCAP2     | Homo sapiens src family associated phosphoprotein 2 (SCAP2), mRNA.                                                                           |
| NM_000140.1 | FECH      | Homo sapiens ferrochelatase (protoporphyrin) (FECH), mRNA.                                                                                   |
| NM_016230.2 | NCB5OR    | Homo sapiens NADPH cytochrome B5 oxidoreductase (NCB5OR), mRNA.                                                                              |
| NM_006503.2 | PSMC4     | Homo sapiens proteasome (prosome, macropain) 26S subunit, ATPase, 4 (PSMC4), transcript variant 1, mRNA.                                     |
| NM_004044.4 | ATIC      | Homo sapiens 5-aminoimidazole-4-carboxamide ribonucleotide formyltransferase/IMP cyclohydrolase (ATIC), mRNA.                                |
| NM_005206.3 | CRK       | Homo sapiens v-crk sarcoma virus CT10 oncogene homolog (avian) (CRK), transcript variant 1, mRNA.                                            |
| NM_020474.2 | GALNT1    | Homo sapiens UDP-N-acetyl-alpha-D-galactosamine:polypeptide N-acetyl-galactosaminyltransferase 1 (GalNAc-T1) (GALNT1), mRNA.                 |
| XM_370639.1 | LOC387791 | Homo sapiens similar to Mitochondrial import receptor subunit TOM20 homolog (Mitochondrial 20 kDa outer membrane protein) (LOC387791), mRNA. |
| NM_006242.3 | PPP1R3D   | Homo sapiens protein phosphatase 1, regulatory subunit 3D (PPP1R3D), mRNA.                                                                   |
| NM_000161.1 | GCH1      | Homo sapiens GTP cyclohydrolase 1 (dopa-responsive dystonia) (GCH1), mRNA.                                                                   |
| NM_003659.1 | AGPS      | Homo sapiens alkylglycerone phosphate synthase (AGPS), mRNA.                                                                                 |
| NM_002595.2 | PCTK2     | Homo sapiens PCTAIRE protein kinase 2 (PCTK2), mRNA.                                                                                         |
| NM_012097.2 | ARL5      | Homo sapiens ADP-ribosylation factor-like 5 (ARL5), transcript variant 1, mRNA.                                                              |
| NM_012250.3 | RRAS2     | Homo sapiens related RAS viral (r-ras) oncogene homolog 2 (RRAS2), mRNA.                                                                     |
| NM_004147.2 | DRG1      | Homo sapiens developmentally regulated GTP binding protein 1 (DRG1), mRNA.                                                                   |
| NM_014570.3 | ARFGAP3   | Homo sapiens ADP-ribosylation factor GTPase activating protein 3 (ARFGAP3), mRNA.                                                            |
| NM_022771.3 | TBC1D15   | Homo sapiens TBC1 domain family, member 15 (TBC1D15), mRNA.                                                                                  |
| NM_002938.2 | RNF4      | Homo sapiens ring finger protein 4 (RNF4), mRNA.                                                                                             |
| NM_019555.1 | ARHGEF3   | Homo sapiens Rho guanine nucleotide exchange factor (GEF) 3 (ARHGEF3), mRNA.                                                                 |
| NM_198530.1 | FLJ46603  | Homo sapiens FLJ46603 protein (FLJ46603), mRNA.                                                                                              |
| NM_000313.1 | PROS1     | Homo sapiens protein S (alpha) (PROS1), mRNA.                                                                                                |
| NM_002086.3 | GRB2      | Homo sapiens growth factor receptor-bound protein 2 (GRB2), transcript variant 1, mRNA.                                                      |
| NM_022456.2 | RAB3IP    | Homo sapiens RAB3A interacting protein (rabin3) (RAB3IP), transcript variant alpha 1, mRNA.                                                  |
| XM_088476.6 | TXNDC4    | Homo sapiens thioredoxin domain containing 4 (endoplasmic reticulum) (TXNDC4), mRNA.                                                         |
| NM_032315.1 | MGC4399   | Homo sapiens mitochondrial carrier protein (MGC4399), mRNA.                                                                                  |
| NM_148170.1 | CTSC      | Homo sapiens cathepsin C (CTSC), transcript variant 2, mRNA.                                                                                 |
| NM_001168.1 | BIRC5     | Homo sapiens baculoviral IAP repeat-containing 5 (survivin) (BIRC5), mRNA.                                                                   |

|             |               |                                                                                                                                           |
|-------------|---------------|-------------------------------------------------------------------------------------------------------------------------------------------|
| NM_014251.1 | SLC25A13      | Homo sapiens solute carrier family 25, member 13 (citrin) (SLC25A13), mRNA.                                                               |
| NM_003384.1 | VRK1          | Homo sapiens vaccinia related kinase 1 (VRK1), mRNA.                                                                                      |
| NM_177968.1 | PPM1B         | Homo sapiens protein phosphatase 1B (formerly 2C), magnesium-dependent, beta isoform (PPM1B), transcript variant 2, mRNA.                 |
| NM_018287.4 | ARHGAP12      | Homo sapiens Rho GTPase activating protein 12 (ARHGAP12), mRNA.                                                                           |
| NM_032314.1 | MGC4767       | Homo sapiens hypothetical protein MGC4767 (MGC4767), mRNA.                                                                                |
| NM_004757.2 | SCYE1         | Homo sapiens small inducible cytokine subfamily E, member 1 (endothelial monocyte-activating) (SCYE1), mRNA.                              |
| NM_015994.2 | ATP6V1D       | Homo sapiens ATPase, H+ transporting, lysosomal 34kDa, V1 subunit D (ATP6V1D), mRNA.                                                      |
| NM_152782.2 | MGC33329      | Homo sapiens hypothetical protein MGC33329 (MGC33329), mRNA.                                                                              |
| NM_030800.1 | DKFZP564O1664 | Homo sapiens hypothetical protein DKFZp564O1664 (DKFZP564O1664), mRNA.                                                                    |
| NM_001530.2 | HIF1A         | Homo sapiens hypoxia-inducible factor 1, alpha subunit (basic helix-loop-helix transcription factor) (HIF1A), transcript variant 1, mRNA. |
| NM_001260.1 | CDK8          | Homo sapiens cyclin-dependent kinase 8 (CDK8), mRNA.                                                                                      |
| NM_017988.2 | FLJ10074      | Homo sapiens hypothetical protein FLJ10074 (FLJ10074), mRNA.                                                                              |
| NM_182916.1 | TRNT1         | Homo sapiens tRNA nucleotidyl transferase, CCA-adding, 1 (TRNT1), mRNA.                                                                   |
| NM_004477.1 | FRG1          | Homo sapiens FSHD region gene 1 (FRG1), mRNA.                                                                                             |
| NM_006918.2 | SC5DL         | Homo sapiens sterol-C5-desaturase (ERG3 delta-5-desaturase homolog, fungal)-like (SC5DL), mRNA.                                           |
| NM_002795.2 | PSMB3         | Homo sapiens proteasome (prosome, macropain) subunit, beta type, 3 (PSMB3), mRNA.                                                         |
| NM_013255.2 | MKLN1         | Homo sapiens muskelin 1, intracellular mediator containing kelch motifs (MKLN1), mRNA.                                                    |
| NM_020183.3 | ARNTL2        | Homo sapiens aryl hydrocarbon receptor nuclear translocator-like 2 (ARNTL2), mRNA.                                                        |
| NM_012328.1 | DNAJB9        | Homo sapiens DnaJ (Hsp40) homolog, subfamily B, member 9 (DNAJB9), mRNA.                                                                  |
| NM_032295.1 | SLC37A3       | Homo sapiens solute carrier family 37 (glycerol-3-phosphate transporter), member 3 (SLC37A3), mRNA.                                       |
| NM_021627.1 | SEN2          | Homo sapiens SUMO1/sentrin/SMT3 specific protease 2 (SEN2), mRNA.                                                                         |
| NM_002745.2 | MAPK1         | Homo sapiens mitogen-activated protein kinase 1 (MAPK1), transcript variant 1, mRNA.                                                      |
| NM_014280.1 | DNAJC8        | Homo sapiens DnaJ (Hsp40) homolog, subfamily C, member 8 (DNAJC8), mRNA.                                                                  |
| NM_021203.2 | SRPRB         | Homo sapiens signal recognition particle receptor, B subunit (SRPRB), mRNA.                                                               |
| NM_002095.3 | GTF2E2        | Homo sapiens general transcription factor IIE, polypeptide 2, beta 34kDa (GTF2E2), mRNA.                                                  |
