# Supplementary material for: MBNL and CELF proteins regulate alternative splicing of the skeletal muscle chloride channel CLCN1
Source: PubMed Central journal article supplement — Nucleic Acids Res. 2009 Aug 31;37(19):6477–90. doi: 10.1093/nar/gkp681 (PMC2770659; doi:10.1093/nar/gkp681), 2009-08-31
Supplement: gkp681v2_2.pdf [file gkp681v2_2.pdf]

## Putative Unigene targets of identified with NF90 motif

| Unigene             | max. # | Score | hits                                                                                                                                                                                                    | hit locations (3'UTR) |
|---------------------|--------|-------|---------------------------------------------------------------------------------------------------------------------------------------------------------------------------------------------------------|-----------------------|
| gnl UG Hs#S2139089  | 1.04   | 1     | 378-405(1.04)                                                                                                                                                                                           |                       |
| gnl UG Hs#S3993272  | 2.3    | 3     | 684-709(1.30) 838-863(2.30) 1047-1075(0.35)                                                                                                                                                             |                       |
| gnl UG Hs#S2293502  | 0.89   | 1     | 214-240(0.89)                                                                                                                                                                                           |                       |
| gnl UG Hs#S4822617  | 2.08   | 3     | 510-535(1.30) 1028-1053(2.08) 1586-1612(0.04)                                                                                                                                                           |                       |
| gnl UG Hs#S14863701 | 1.67   | 3     | 891-916(0.14) 1351-1377(1.67) 1654-1681(0.47)                                                                                                                                                           |                       |
| gnl UG Hs#S4820352  | 1.76   | 2     | 1145-1171(0.52) 2779-2804(1.76)                                                                                                                                                                         |                       |
| gnl UG Hs#S2139264  | 1.26   | 1     | 189-215(1.26)                                                                                                                                                                                           |                       |
| gnl UG Hs#S5494999  | 1.17   | 1     | 537-562(1.17)                                                                                                                                                                                           |                       |
| gnl UG Hs#S5978385  | 5.28   | 2     | 224-249(5.28) 261-286(2.46)                                                                                                                                                                             |                       |
| gnl UG Hs#S2293530  | 1.4    | 2     | 200-226(1.40) 636-662(0.08)                                                                                                                                                                             |                       |
| gnl UG Hs#S14812373 | 0.32   | 1     | 1032-1056(0.32)                                                                                                                                                                                         |                       |
| gnl UG Hs#S2294590  | 1.24   | 3     | 162-187(1.24) 768-794(0.08) 1309-1334(0.89)                                                                                                                                                             |                       |
| gnl UG Hs#S1731028  | 0.3    | 1     | 111-139(0.30)                                                                                                                                                                                           |                       |
| gnl UG Hs#S1731506  | 1.67   | 3     | 1058-1084(1.67) 1085-1111(1.08) 1150-1175(0.17)                                                                                                                                                         |                       |
| gnl UG Hs#S4553565  | 2.98   | 2     | 774-799(2.98) 1241-1266(0.46)                                                                                                                                                                           |                       |
| gnl UG Hs#S2140367  | 1.78   | 3     | 137-162(0.72) 195-220(0.30) 1495-1520(1.78)                                                                                                                                                             |                       |
| gnl UG Hs#S15635468 | 2.98   | 5     | 510-539(2.98) 784-810(2.17) 827-850(0.69) 955-981(0.33) 1316-1341(0.13)                                                                                                                                 |                       |
| gnl UG Hs#S4621470  | 2.97   | 3     | 78-103(2.97) 432-457(0.24) 492-517(0.08)                                                                                                                                                                |                       |
| gnl UG Hs#S10832097 | 2.46   | 1     | 508-533(2.46)                                                                                                                                                                                           |                       |
| gnl UG Hs#S4827514  | 5.87   | 9     | 258-282(1.39) 389-417(5.87) 1025-1050(5.62) 1100-1125(0.72) 1293-1318(0.80) 2213-2241(1.15) 2255-2280(0.68) 2420-2447(1.02) 2660-2685(0.82)                                                             |                       |
| gnl UG Hs#S15898576 | 2.62   | 4     | 132-157(0.59) 403-428(2.36) 1107-1131(0.94) 1389-1415(2.62)                                                                                                                                             |                       |
| gnl UG Hs#S15632200 | 4.23   | 3     | 21-49(0.59) 724-749(0.72) 757-783(4.23)                                                                                                                                                                 |                       |
| gnl UG Hs#S3601530  | 2.04   | 2     | 207-235(0.49) 237-262(2.04)                                                                                                                                                                             |                       |
| gnl UG Hs#S4807638  | 1.67   | 3     | 182-207(1.11) 887-912(1.11) 1148-1173(1.67)                                                                                                                                                             |                       |
| gnl UG Hs#S4554648  | 1.41   | 1     | 76-101(1.41)                                                                                                                                                                                            |                       |
| gnl UG Hs#S4807742  | 4.26   | 2     | 820-845(4.26) 2030-2058(0.09)                                                                                                                                                                           |                       |
| gnl UG Hs#S4553541  | 3.43   | 2     | 280-305(0.61) 330-355(3.43)                                                                                                                                                                             |                       |
| gnl UG Hs#S1732278  | 0.24   | 1     | 574-602(0.24)                                                                                                                                                                                           |                       |
| gnl UG Hs#S1727054  | 0.65   | 1     | 683-708(0.65)                                                                                                                                                                                           |                       |
| gnl UG Hs#S1730933  | 0.59   | 1     | 790-818(0.59)                                                                                                                                                                                           |                       |
| gnl UG Hs#S1731349  | 0.91   | 3     | 384-410(0.91) 564-589(0.26) 752-779(0.41)                                                                                                                                                               |                       |
| gnl UG Hs#S3439091  | 0.72   | 1     | 582-609(0.72)                                                                                                                                                                                           |                       |
| gnl UG Hs#S4553278  | 1.37   | 1     | 75-102(1.37)                                                                                                                                                                                            |                       |
| gnl UG Hs#S2293174  | 1.33   | 1     | 92-119(1.33)                                                                                                                                                                                            |                       |
| gnl UG Hs#S1729169  | 3.24   | 1     | 672-697(3.24)                                                                                                                                                                                           |                       |
| gnl UG Hs#S1730709  | 4.23   | 1     | 389-415(4.23)                                                                                                                                                                                           |                       |
| gnl UG Hs#S1728961  | 3.66   | 4     | 298-323(0.58) 372-398(0.23) 603-629(3.66) 974-999(3.65)                                                                                                                                                 |                       |
| gnl UG Hs#S2294006  | 2.72   | 3     | 266-291(2.72) 1075-1101(1.23) 1233-1259(0.50)                                                                                                                                                           |                       |
| gnl UG Hs#S15641543 | 2.65   | 6     | 465-491(1.94) 703-728(1.02) 973-999(2.65) 1132-1157(0.26) 1311-1336(0.72) 1552-1578(0.91)                                                                                                               |                       |
| gnl UG Hs#S2293686  | 0.27   | 1     | 275-299(0.27)                                                                                                                                                                                           |                       |
| gnl UG Hs#S15639840 | 1.98   | 2     | 843-868(1.98) 1483-1508(0.17)                                                                                                                                                                           |                       |
| gnl UG Hs#S3219910  | 1.46   | 2     | 664-689(1.46) 2084-2109(0.33)                                                                                                                                                                           |                       |
| gnl UG Hs#S4825329  | 5.72   | 5     | 1423-1451(0.88) 1469-1495(2.99) 1920-1946(1.60) 2191-2216(0.24) 3347-3373(5.72)                                                                                                                         |                       |
| gnl UG Hs#S2294008  | 0.05   | 1     | 587-614(0.05)                                                                                                                                                                                           |                       |
| gnl UG Hs#S4824793  | 1.4    | 6     | 249-277(0.23) 326-351(1.13) 807-833(0.42) 1243-1267(0.91) 1656-1681(1.40) 2562-2589(0.07)                                                                                                               |                       |
| gnl UG Hs#S2294058  | 0.14   | 2     | 310-336(0.10) 984-1009(0.14)                                                                                                                                                                            |                       |
| gnl UG Hs#S5495042  | 0.29   | 1     | 284-311(0.29)                                                                                                                                                                                           |                       |
| gnl UG Hs#S3219948  | 3.97   | 4     | 191-216(3.97) 290-317(0.49) 755-780(0.88) 985-1011(3.05)                                                                                                                                                |                       |
| gnl UG Hs#S3989591  | 2.87   | 2     | 1395-1420(0.88) 1676-1703(2.87)                                                                                                                                                                         |                       |
| gnl UG Hs#S4821335  | 2.79   | 13    | 314-339(0.24) 438-463(1.68) 593-619(1.66) 914-939(0.61) 1570-1598(1.23) 2189-2215(1.40) 2224-2247(2.46) 3567-3592(0.98) 3607-3632(1.17) 4511-4537(0.72) 4692-4717(0.94) 5537-5562(0.14) 5562-5587(0.14) |                       |
| gnl UG Hs#S1731136  | 1.53   | 1     | 817-842(1.53)                                                                                                                                                                                           |                       |

|                     |      |    |                                                                                                                                                                                           |
|---------------------|------|----|-------------------------------------------------------------------------------------------------------------------------------------------------------------------------------------------|
| gnl UG Hs#S4285159  | 0.03 | 1  | 1079-1106(0.03)                                                                                                                                                                           |
| gnl UG Hs#S4614522  | 0.72 | 1  | 1940-1966(0.72)                                                                                                                                                                           |
| gnl UG Hs#S3803664  | 0.37 | 1  | 231-257(0.37)                                                                                                                                                                             |
| gnl UG Hs#S3439654  | 0.19 | 1  | 501-526(0.19)                                                                                                                                                                             |
| gnl UG Hs#S1729050  | 1.57 | 1  | 80-106(1.57)                                                                                                                                                                              |
| gnl UG Hs#S1731485  | 5.36 | 2  | 214-242(5.36) 357-382(0.30)                                                                                                                                                               |
| gnl UG Hs#S3973122  | 0.5  | 1  | 1346-1372(0.50)                                                                                                                                                                           |
| gnl UG Hs#S14802451 | 0.81 | 4  | 884-912(0.81) 936-961(0.46) 1256-1282(0.26) 2425-2453(0.52)                                                                                                                               |
| gnl UG Hs#S4623444  | 6.62 | 7  | 641-669(1.17) 693-719(2.79) 743-771(1.92) 1684-1709(6.62) 2003-2032(0.90) 2218-2243(0.91) 2742-2771(0.39)                                                                                 |
| gnl UG Hs#S2294497  | 0.81 | 3  | 330-355(0.68) 1715-1740(0.81) 2333-2356(0.19)                                                                                                                                             |
| gnl UG Hs#S3438878  | 1.08 | 1  | 96-122(1.08)                                                                                                                                                                              |
| gnl UG Hs#S15639037 | 1.53 | 1  | 170-195(1.53)                                                                                                                                                                             |
| gnl UG Hs#S3219492  | 2.91 | 1  | 146-171(2.91)                                                                                                                                                                             |
| gnl UG Hs#S3601572  | 3.52 | 2  | 1093-1119(2.83) 1491-1518(3.52)                                                                                                                                                           |
| gnl UG Hs#S1726827  | 1.55 | 2  | 84-109(1.55) 822-847(0.46)                                                                                                                                                                |
| gnl UG Hs#S3219566  | 0.09 | 1  | 1613-1639(0.09)                                                                                                                                                                           |
| gnl UG Hs#S3826006  | 2.88 | 2  | 96-121(2.88) 196-222(0.50)                                                                                                                                                                |
| gnl UG Hs#S4808304  | 2.78 | 3  | 295-321(0.40) 1154-1180(0.54) 1297-1325(2.78)                                                                                                                                             |
| gnl UG Hs#S2139485  | 2.1  | 5  | 234-259(1.83) 304-329(2.10) 515-539(1.17) 652-677(1.82) 1477-1505(0.07)                                                                                                                   |
| gnl UG Hs#S3803609  | 2.65 | 2  | 224-249(0.94) 1266-1291(2.65)                                                                                                                                                             |
| gnl UG Hs#S4816400  | 1.26 | 1  | 115-140(1.26)                                                                                                                                                                             |
| gnl UG Hs#S1729878  | 0.91 | 3  | 197-225(0.65) 804-829(0.91) 1261-1287(0.27)                                                                                                                                               |
| gnl UG Hs#S5931145  | 2.72 | 5  | 9-34(1.46) 141-166(2.29) 356-381(2.20) 503-528(2.72) 579-604(0.21)                                                                                                                        |
| gnl UG Hs#S4821389  | 1.75 | 4  | 235-258(1.75) 313-338(1.43) 460-485(0.36) 1506-1531(0.66)                                                                                                                                 |
| gnl UG Hs#S7110433  | 2.23 | 1  | 1840-1868(2.23)                                                                                                                                                                           |
| gnl UG Hs#S4815102  | 1.49 | 5  | 811-836(0.45) 1343-1366(0.10) 1381-1407(1.49) 1444-1469(0.72) 1602-1627(1.48)                                                                                                             |
| gnl UG Hs#S3355651  | 1.04 | 1  | 223-248(1.04)                                                                                                                                                                             |
| gnl UG Hs#S15631737 | 3.94 | 2  | 1369-1394(0.04) 1593-1618(3.94)                                                                                                                                                           |
| gnl UG Hs#S2293384  | 5.11 | 1  | 472-497(5.11)                                                                                                                                                                             |
| gnl UG Hs#S1731722  | 2.3  | 3  | 406-432(1.91) 444-470(1.34) 1029-1054(2.30)                                                                                                                                               |
| gnl UG Hs#S1729740  | 1.88 | 2  | 107-134(1.88) 379-406(0.45)                                                                                                                                                               |
| gnl UG Hs#S15730191 | 0.94 | 1  | 43-71(0.94)                                                                                                                                                                               |
| gnl UG Hs#S1727956  | 0.69 | 1  | 117-145(0.69)                                                                                                                                                                             |
| gnl UG Hs#S7111976  | 7.56 | 6  | 1035-1061(7.56) 1489-1514(2.85) 1694-1720(2.62) 1831-1856(0.40) 1966-1991(0.08) 2316-2342(0.65)                                                                                           |
| gnl UG Hs#S3619579  | 1.46 | 1  | 410-435(1.46)                                                                                                                                                                             |
| gnl UG Hs#S816220   | 0.48 | 2  | 2281-2306(0.48) 2483-2508(0.30)                                                                                                                                                           |
| gnl UG Hs#S1727470  | 1.4  | 3  | 38-63(0.17) 235-260(0.57) 497-522(1.40)                                                                                                                                                   |
| gnl UG Hs#S472684   | 0.84 | 2  | 774-801(0.69) 2733-2759(0.84)                                                                                                                                                             |
| gnl UG Hs#S1727069  | 2.98 | 4  | 353-378(0.30) 1926-1951(1.35) 1977-2002(1.72) 2034-2059(2.98)                                                                                                                             |
| gnl UG Hs#S4622223  | 1.56 | 4  | 60-86(1.56) 522-547(0.62) 569-594(0.07) 685-713(0.66)                                                                                                                                     |
| gnl UG Hs#S3814518  | 0.23 | 1  | 880-906(0.23)                                                                                                                                                                             |
| gnl UG Hs#S1727133  | 3.4  | 2  | 106-132(3.40) 509-536(0.24)                                                                                                                                                               |
| gnl UG Hs#S3817949  | 1.17 | 1  | 169-194(1.17)                                                                                                                                                                             |
| gnl UG Hs#S14802396 | 0.36 | 1  | 493-520(0.36)                                                                                                                                                                             |
| gnl UG Hs#S1729663  | 0.65 | 1  | 23-48(0.65)                                                                                                                                                                               |
| gnl UG Hs#S5978374  | 6.94 | 14 | 174-199(1.08) 393-420(1.88) 501-527(1.10) 613-639(4.78) 755-780(6.30) 785-810(1.30) 1121-1146(2.31) 1463-1488(6.94) 1717-1742(0.27) 1800-1825(0.72) 1891-1917(0.66) 1960-1985(1.57) 2171- |
| gnl UG Hs#S2139567  | 1.5  | 2  | 509-537(1.04) 553-582(1.50)                                                                                                                                                               |
| gnl UG Hs#S4813750  | 0.88 | 2  | 294-320(0.17) 693-719(0.88)                                                                                                                                                               |
| gnl UG Hs#S4546006  | 3.47 | 2  | 697-720(0.37) 851-878(3.47)                                                                                                                                                               |
| gnl UG Hs#S2140077  | 4.47 | 2  | 100-125(4.47) 460-486(0.01)                                                                                                                                                               |
| gnl UG Hs#S10831948 | 0.17 | 1  | 1493-1518(0.17)                                                                                                                                                                           |
| gnl UG Hs#S1732140  | 3.72 | 7  | 804-829(0.72) 1653-1678(2.56) 1872-1897(0.82) 2023-2048(3.52) 2243-2269(0.50) 2952-2978(3.72) 3627-3652(1.46)                                                                             |
| gnl UG Hs#S1731302  | 1.42 | 1  | 165-193(1.42)                                                                                                                                                                             |
| gnl UG Hs#S3220092  | 1.44 | 2  | 1237-1265(0.59) 1775-1801(1.44)                                                                                                                                                           |

|                     |      |                                                                                                                                                         |
|---------------------|------|---------------------------------------------------------------------------------------------------------------------------------------------------------|
| gnl UG Hs#S1729849  | 1.05 | 2 357-383(0.36) 587-612(1.05)                                                                                                                           |
| gnl UG Hs#S3618618  | 2.55 | 10 28-54(1.40) 89-114(0.66) 847-875(2.23) 971-997(0.54) 2552-2580(2.55) 2630-2655(1.89) 2707-2732(0.62) 2767-2793(0.28) 2942-2967(1.34) 3014-3041(0.94) |
| gnl UG Hs#S2293479  | 2.07 | 5 83-111(2.07) 229-254(0.17) 649-674(0.36) 954-980(1.30) 1000-1025(0.46)                                                                                |
| gnl UG Hs#S1729036  | 0.67 | 4 111-136(0.07) 171-196(0.48) 1163-1188(0.07) 1269-1292(0.67)                                                                                           |
| gnl UG Hs#S11046612 | 0.58 | 1 92-118(0.58)                                                                                                                                          |
| gnl UG Hs#S7111721  | 0.64 | 1 519-547(0.64)                                                                                                                                         |
| gnl UG Hs#S1727282  | 3.57 | 3 253-278(1.89) 443-469(0.18) 510-535(3.57)                                                                                                             |
| gnl UG Hs#S4828548  | 2.45 | 2 209-235(0.01) 287-312(2.45)                                                                                                                           |
| gnl UG Hs#S4807817  | 2.76 | 2 395-420(0.90) 570-596(2.76)                                                                                                                           |
| gnl UG Hs#S1731218  | 1.26 | 2 18-44(1.26) 101-126(0.58)                                                                                                                             |
| gnl UG Hs#S15846837 | 0.5  | 2 331-357(0.50) 402-428(0.04)                                                                                                                           |
| gnl UG Hs#S14802214 | 4.88 | 1 69-96(4.88)                                                                                                                                           |
| gnl UG Hs#S1726966  | 0.32 | 1 134-159(0.32)                                                                                                                                         |
| gnl UG Hs#S4809865  | 2.2  | 5 924-949(2.20) 980-1007(0.23) 1153-1179(2.18) 1438-1464(0.58) 1614-1640(0.81)                                                                          |
| gnl UG Hs#S14813073 | 1.82 | 2 839-862(1.43) 5182-5205(1.82)                                                                                                                         |
| gnl UG Hs#S6091908  | 2.57 | 3 69-95(1.40) 360-385(2.57) 879-907(0.34)                                                                                                               |
| gnl UG Hs#S1729530  | 2.23 | 1 491-519(2.23)                                                                                                                                         |
| gnl UG Hs#S1728550  | 1.14 | 1 402-427(1.14)                                                                                                                                         |
| gnl UG Hs#S4808213  | 3.98 | 1 24-49(3.98)                                                                                                                                           |
| gnl UG Hs#S1731541  | 0.98 | 2 445-470(0.18) 551-577(0.98)                                                                                                                           |
| gnl UG Hs#S15637484 | 4.62 | 5 143-169(2.90) 990-1013(4.11) 1056-1083(0.69) 1273-1298(4.62) 1557-1584(0.32)                                                                          |
| gnl UG Hs#S3219510  | 0.14 | 1 209-234(0.14)                                                                                                                                         |
| gnl UG Hs#S3438921  | 2.83 | 2 146-172(2.83) 606-634(2.40)                                                                                                                           |
| gnl UG Hs#S1730227  | 1.76 | 2 109-135(1.76) 628-651(0.47)                                                                                                                           |
| gnl UG Hs#S1729697  | 3.01 | 4 1012-1037(3.01) 1316-1341(1.69) 1737-1763(2.23) 1766-1791(0.43)                                                                                       |
| gnl UG Hs#S2139700  | 3.15 | 1 427-453(3.15)                                                                                                                                         |
| gnl UG Hs#S1728125  | 1.14 | 1 35-60(1.14)                                                                                                                                           |
| gnl UG Hs#S1732083  | 1.53 | 2 409-434(1.43) 540-565(1.53)                                                                                                                           |
| gnl UG Hs#S1728392  | 3.84 | 3 488-513(3.84) 689-714(3.40) 836-862(0.00)                                                                                                             |
| gnl UG Hs#S3603829  | 2.93 | 2 287-313(2.93) 383-408(0.09)                                                                                                                           |
| gnl UG Hs#S4436338  | 0.72 | 1 55-80(0.72)                                                                                                                                           |
| gnl UG Hs#S1727082  | 4.97 | 3 156-182(0.50) 232-260(4.97) 494-519(0.26)                                                                                                             |
| gnl UG Hs#S2139971  | 0.5  | 1 260-286(0.50)                                                                                                                                         |
| gnl UG Hs#S4631395  | 4.94 | 2 314-339(0.39) 1413-1438(4.94)                                                                                                                         |
| gnl UG Hs#S4285036  | 3.38 | 6 1576-1602(1.40) 1639-1667(0.23) 1786-1812(3.38) 3113-3138(0.94) 4289-4315(1.04) 4795-4823(0.07)                                                       |
| gnl UG Hs#S2139824  | 0.26 | 1 102-127(0.26)                                                                                                                                         |
| gnl UG Hs#S2139909  | 1.75 | 2 128-155(1.66) 186-211(1.75)                                                                                                                           |
| gnl UG Hs#S2293245  | 0.88 | 1 543-568(0.88)                                                                                                                                         |
| gnl UG Hs#S1732336  | 2.55 | 4 227-252(0.94) 359-385(2.27) 756-781(2.55) 1802-1828(2.52)                                                                                             |
| gnl UG Hs#S4823896  | 1.91 | 3 191-215(1.91) 660-685(1.17) 1270-1295(0.30)                                                                                                           |
| gnl UG Hs#S3619237  | 1.3  | 1 395-423(1.30)                                                                                                                                         |
| gnl UG Hs#S4546273  | 1.9  | 1 439-466(1.90)                                                                                                                                         |
| gnl UG Hs#S2138666  | 3.62 | 4 134-162(2.92) 214-239(0.23) 820-846(3.62) 1457-1485(0.39)                                                                                             |
| gnl UG Hs#S3881167  | 6.62 | 2 241-266(6.62) 311-337(1.52)                                                                                                                           |
| gnl UG Hs#S7111042  | 0.81 | 4 413-439(0.17) 903-931(0.30) 1026-1051(0.04) 1962-1987(0.81)                                                                                           |
| gnl UG Hs#S4807660  | 0.89 | 1 265-288(0.89)                                                                                                                                         |
| gnl UG Hs#S2139496  | 2.55 | 8 143-170(2.55) 429-454(0.37) 889-912(0.47) 2390-2416(0.78) 2829-2855(2.06) 2956-2979(0.24) 3338-3363(0.26) 3396-3424(0.30)                             |
| gnl UG Hs#S4553698  | 2.98 | 1 126-151(2.98)                                                                                                                                         |
| gnl UG Hs#S1730194  | 1.9  | 1 538-563(1.90)                                                                                                                                         |
| gnl UG Hs#S4617251  | 4.78 | 4 449-476(4.78) 813-840(0.98) 983-1009(0.72) 1362-1387(0.40)                                                                                            |
| gnl UG Hs#S15631455 | 1.17 | 2 503-529(1.17) 685-711(0.55)                                                                                                                           |
| gnl UG Hs#S1727265  | 4.53 | 3 373-398(0.87) 426-450(0.55) 752-777(4.53)                                                                                                             |
| gnl UG Hs#S4615980  | 4.33 | 2 535-560(0.98) 691-716(4.33)                                                                                                                           |
| gnl UG Hs#S4618696  | 0.66 | 2 791-820(0.66) 1358-1381(0.46)                                                                                                                         |

|                     |      |                                                                                                 |
|---------------------|------|-------------------------------------------------------------------------------------------------|
| gnl UG Hs#S1732433  | 4.26 | 2 485-510(4.26) 657-682(3.04)                                                                   |
| gnl UG Hs#S1731759  | 1.72 | 4 76-101(1.59) 254-279(0.20) 293-321(0.71) 419-444(1.72)                                        |
| gnl UG Hs#S4825757  | 1.1  | 3 1021-1048(0.24) 1239-1265(0.69) 1476-1504(1.10)                                               |
| gnl UG Hs#S7110460  | 2.72 | 3 699-726(2.56) 778-806(2.72) 1934-1960(1.08)                                                   |
| gnl UG Hs#S3438600  | 2.01 | 1 1599-1624(2.01)                                                                               |
| gnl UG Hs#S1729684  | 1.52 | 1 596-624(1.52)                                                                                 |
| gnl UG Hs#S3619185  | 1.08 | 2 927-952(0.04) 1077-1102(1.08)                                                                 |
| gnl UG Hs#S2293599  | 1.76 | 2 427-452(1.40) 483-509(1.76)                                                                   |
| gnl UG Hs#S2139610  | 4.24 | 2 60-85(4.24) 1499-1524(1.51)                                                                   |
| gnl UG Hs#S3881215  | 0.3  | 1 76-99(0.30)                                                                                   |
| gnl UG Hs#S3438812  | 0.57 | 1 542-567(0.57)                                                                                 |
| gnl UG Hs#S1726208  | 2.23 | 1 231-256(2.23)                                                                                 |
| gnl UG Hs#S1731135  | 3.52 | 4 128-153(0.08) 1042-1067(3.52) 1099-1124(0.50) 1260-1285(1.17)                                 |
| gnl UG Hs#S15638191 | 0.65 | 1 2825-2850(0.65)                                                                               |
| gnl UG Hs#S1732357  | 4.11 | 4 339-364(1.36) 1205-1230(2.98) 1977-2003(1.75) 2392-2417(4.11)                                 |
| gnl UG Hs#S4807603  | 0.78 | 1 112-137(0.78)                                                                                 |
| gnl UG Hs#S4622304  | 2.46 | 2 846-872(0.04) 994-1020(2.46)                                                                  |
| gnl UG Hs#S2138676  | 0.98 | 2 268-292(0.07) 1059-1084(0.98)                                                                 |
| gnl UG Hs#S3814694  | 3.71 | 1 436-461(3.71)                                                                                 |
| gnl UG Hs#S2293281  | 0.27 | 1 667-694(0.27)                                                                                 |
| gnl UG Hs#S1731430  | 1.3  | 1 8-36(1.30)                                                                                    |
| gnl UG Hs#S5518169  | 2.94 | 1 409-434(2.94)                                                                                 |
| gnl UG Hs#S4283747  | 3.55 | 2 525-550(3.55) 1544-1569(0.34)                                                                 |
| gnl UG Hs#S2293195  | 0.55 | 2 758-784(0.26) 1099-1127(0.55)                                                                 |
| gnl UG Hs#S1727545  | 0.46 | 1 419-444(0.46)                                                                                 |
| gnl UG Hs#S1726298  | 0.4  | 1 38-63(0.40)                                                                                   |
| gnl UG Hs#S1824324  | 0.16 | 1 65-89(0.16)                                                                                   |
| gnl UG Hs#S1729322  | 1.2  | 2 672-697(1.20) 747-773(0.33)                                                                   |
| gnl UG Hs#S1728844  | 1.56 | 1 636-661(1.56)                                                                                 |
| gnl UG Hs#S1727787  | 2.11 | 3 472-497(0.13) 839-864(2.11) 926-954(1.01)                                                     |
| gnl UG Hs#S15633057 | 0.92 | 1 622-646(0.92)                                                                                 |
| gnl UG Hs#S998757   | 0.91 | 1 1661-1686(0.91)                                                                               |
| gnl UG Hs#S3989527  | 2.66 | 2 714-741(2.66) 895-920(1.26)                                                                   |
| gnl UG Hs#S1727558  | 3.67 | 4 212-237(0.91) 401-429(0.12) 599-625(0.08) 847-873(3.67)                                       |
| gnl UG Hs#S5978493  | 1.24 | 1 664-689(1.24)                                                                                 |
| gnl UG Hs#S417639   | 6.89 | 2 328-354(6.89) 361-386(0.33)                                                                   |
| gnl UG Hs#S2138757  | 2.3  | 6 732-759(0.26) 866-892(2.30) 894-916(1.16) 939-964(0.82) 993-1018(0.62) 1414-1441(0.70)        |
| gnl UG Hs#S2139393  | 3.08 | 4 450-475(3.08) 768-796(1.40) 970-996(1.34) 1057-1082(1.81)                                     |
| gnl UG Hs#S6159025  | 5.11 | 4 736-762(0.23) 1437-1467(1.43) 2928-2953(5.11) 3267-3292(1.39)                                 |
| gnl UG Hs#S4044803  | 3.75 | 1 3573-3599(3.75)                                                                               |
| gnl UG Hs#S2139866  | 1.87 | 3 452-477(0.46) 490-515(1.87) 1202-1227(1.30)                                                   |
| gnl UG Hs#S7110740  | 1.46 | 2 811-837(0.01) 954-979(1.46)                                                                   |
| gnl UG Hs#S4616129  | 1.81 | 6 328-353(0.36) 524-550(1.75) 760-785(0.21) 1876-1903(1.14) 2070-2100(1.81) 2659-2685(1.01)     |
| gnl UG Hs#S1727216  | 0.3  | 1 304-332(0.30)                                                                                 |
| gnl UG Hs#S3439071  | 2.72 | 6 323-349(0.26) 1082-1107(1.62) 1664-1688(0.84) 1689-1714(0.33) 1760-1788(0.23) 1830-1858(2.72) |
| gnl UG Hs#S3602231  | 2.27 | 1 1926-1952(2.27)                                                                               |
| gnl UG Hs#S1730986  | 1.62 | 5 377-405(0.45) 583-609(1.62) 1133-1158(0.53) 1801-1826(0.48) 1876-1902(0.23)                   |
| gnl UG Hs#S4807581  | 1.79 | 2 604-630(0.91) 1564-1589(1.79)                                                                 |
| gnl UG Hs#S3219016  | 1.25 | 1 155-183(1.25)                                                                                 |
| gnl UG Hs#S5860345  | 0.14 | 1 554-579(0.14)                                                                                 |
| gnl UG Hs#S4823929  | 2.88 | 5 446-470(2.88) 833-858(0.36) 1018-1043(0.13) 1181-1206(0.72) 2493-2518(0.40)                   |
| gnl UG Hs#S4817797  | 1.2  | 3 231-256(1.04) 285-311(1.08) 903-928(1.20)                                                     |
| gnl UG Hs#S4807604  | 4.3  | 5 31-56(1.34) 543-568(4.30) 754-779(0.65) 786-814(0.30) 1581-1606(2.72)                         |
| gnl UG Hs#S1726420  | 0.4  | 1 604-629(0.40)                                                                                 |

|                    |      |   |                                                                                                         |
|--------------------|------|---|---------------------------------------------------------------------------------------------------------|
| gnl UG Hs#S2293719 | 1.86 | 4 | 381-409(0.16) 1166-1192(1.86) 1645-1671(0.84) 1694-1720(1.83)                                           |
| gnl UG Hs#S3219552 | 1.89 | 3 | 221-246(1.89) 588-613(0.13) 2170-2197(0.97)                                                             |
| gnl UG Hs#S1729687 | 1.63 | 1 | 222-248(1.63)                                                                                           |
| gnl UG Hs#S2293418 | 2.33 | 3 | 214-239(1.40) 1455-1480(2.33) 1875-1901(0.43)                                                           |
| gnl UG Hs#S3219347 | 1.94 | 3 | 908-932(0.71) 1584-1609(0.13) 1843-1870(1.94)                                                           |
| gnl UG Hs#S2140224 | 1.33 | 3 | 1385-1409(0.14) 1893-1919(1.26) 2006-2031(1.33)                                                         |
| gnl UG Hs#S2139678 | 2.08 | 1 | 1068-1094(2.08)                                                                                         |
| gnl UG Hs#S2139164 | 0.3  | 1 | 222-247(0.30)                                                                                           |
| gnl UG Hs#S1730894 | 1.13 | 3 | 169-196(0.92) 491-516(0.04) 725-750(1.13)                                                               |
| gnl UG Hs#S4284093 | 0.11 | 1 | 1101-1127(0.11)                                                                                         |
| gnl UG Hs#S2293998 | 1.98 | 2 | 407-432(1.98) 466-491(0.09)                                                                             |
| gnl UG Hs#S3603157 | 1.92 | 1 | 236-262(1.92)                                                                                           |
| gnl UG Hs#S270387  | 0.61 | 1 | 119-146(0.61)                                                                                           |
| gnl UG Hs#S2294506 | 1.63 | 2 | 225-250(0.72) 262-287(1.63)                                                                             |
| gnl UG Hs#S1731285 | 0.23 | 1 | 328-353(0.23)                                                                                           |
| gnl UG Hs#S3601735 | 4.3  | 6 | 1034-1060(0.47) 1316-1342(4.30) 1474-1500(3.18) 1743-1768(0.20) 2054-2079(0.34) 2144-2169(1.04)         |
| gnl UG Hs#S2293674 | 1.18 | 2 | 218-244(0.33) 1344-1370(1.18)                                                                           |
| gnl UG Hs#S3988015 | 0.21 | 1 | 820-846(0.21)                                                                                           |
| gnl UG Hs#S1727722 | 3.67 | 1 | 29-55(3.67)                                                                                             |
| gnl UG Hs#S4046550 | 1.36 | 1 | 119-144(1.36)                                                                                           |
| gnl UG Hs#S3993546 | 2.72 | 1 | 781-806(2.72)                                                                                           |
| gnl UG Hs#S1726418 | 2.21 | 1 | 228-253(2.21)                                                                                           |
| gnl UG Hs#S1728002 | 4.66 | 2 | 481-507(1.86) 574-602(4.66)                                                                             |
| gnl UG Hs#S7110713 | 0.94 | 2 | 2-26(0.11) 121-146(0.94)                                                                                |
| gnl UG Hs#S1824401 | 3.78 | 6 | 467-492(1.37) 1129-1154(1.78) 1703-1728(3.78) 3888-3914(0.75) 4321-4347(2.04) 5438-5461(1.47)           |
| gnl UG Hs#S4807599 | 0.59 | 2 | 502-530(0.59) 671-696(0.46)                                                                             |
| gnl UG Hs#S4045880 | 2.13 | 1 | 185-211(2.13)                                                                                           |
| gnl UG Hs#S1727872 | 1.56 | 3 | 382-407(1.56) 1518-1543(1.36) 2035-2061(0.84)                                                           |
| gnl UG Hs#S5930944 | 1.81 | 3 | 262-287(1.81) 1214-1240(1.69) 1322-1348(1.65)                                                           |
| gnl UG Hs#S5978572 | 0.8  | 1 | 342-369(0.80)                                                                                           |
| gnl UG Hs#S1729342 | 5.58 | 3 | 452-477(5.58) 1564-1590(1.17) 1895-1922(1.17)                                                           |
| gnl UG Hs#S3619201 | 0.83 | 4 | 211-236(0.72) 1151-1177(0.83) 1279-1304(0.72) 1715-1741(0.52)                                           |
| gnl UG Hs#S3220053 | 1.25 | 4 | 241-265(1.25) 485-511(0.04) 1038-1065(0.69) 1199-1224(0.72)                                             |
| gnl UG Hs#S1731106 | 2.35 | 1 | 335-361(2.35)                                                                                           |
| gnl UG Hs#S1727186 | 2.98 | 3 | 260-285(2.98) 1049-1072(0.81) 1238-1263(0.94)                                                           |
| gnl UG Hs#S1731279 | 0.13 | 1 | 122-147(0.13)                                                                                           |
| gnl UG Hs#S7111237 | 1.26 | 1 | 964-993(1.26)                                                                                           |
| gnl UG Hs#S1727024 | 2.94 | 3 | 299-324(0.46) 407-432(0.76) 818-843(2.94)                                                               |
| gnl UG Hs#S2293603 | 3.85 | 1 | 500-525(3.85)                                                                                           |
| gnl UG Hs#S2139438 | 3.93 | 7 | 120-145(1.34) 475-500(2.47) 733-759(3.08) 848-874(3.04) 1099-1124(1.68) 1168-1193(1.04) 1265-1290(3.93) |
| gnl UG Hs#S1727843 | 2.95 | 1 | 424-450(2.95)                                                                                           |
| gnl UG Hs#S7112147 | 2.17 | 2 | 515-540(2.17) 792-818(1.01)                                                                             |
| gnl UG Hs#S4820691 | 1.76 | 2 | 279-306(1.76) 313-340(0.21)                                                                             |
| gnl UG Hs#S3601757 | 4.04 | 3 | 365-391(4.04) 809-837(0.40) 1128-1155(0.17)                                                             |
| gnl UG Hs#S4825405 | 0.44 | 1 | 1756-1782(0.44)                                                                                         |
| gnl UG Hs#S7111496 | 0.36 | 1 | 143-170(0.36)                                                                                           |
| gnl UG Hs#S2140323 | 3.49 | 1 | 653-679(3.49)                                                                                           |
| gnl UG Hs#S3438511 | 1.92 | 2 | 1315-1340(0.94) 1579-1603(1.92)                                                                         |
| gnl UG Hs#S1730427 | 1.13 | 1 | 115-141(1.13)                                                                                           |
| gnl UG Hs#S4814672 | 2.3  | 2 | 1618-1643(0.55) 2092-2115(2.30)                                                                         |
| gnl UG Hs#S4807790 | 1.65 | 3 | 255-281(0.76) 570-596(0.53) 866-891(1.65)                                                               |
| gnl UG Hs#S3601653 | 2.49 | 1 | 397-423(2.49)                                                                                           |
| gnl UG Hs#S5978505 | 2.13 | 4 | 380-406(1.24) 1137-1162(2.13) 1587-1613(1.60) 1984-2010(0.21)                                           |
| gnl UG Hs#S4807519 | 1.47 | 3 | 751-776(0.13) 820-846(1.26) 1050-1075(1.47)                                                             |

|                     |      |                                                                                                                             |
|---------------------|------|-----------------------------------------------------------------------------------------------------------------------------|
| gnl UG Hs#S2139555  | 0.17 | 2 2502-2527(0.08) 3282-3307(0.17)                                                                                           |
| gnl UG Hs#S3219899  | 0.37 | 1 399-424(0.37)                                                                                                             |
| gnl UG Hs#S5978422  | 2.58 | 7 181-206(2.33) 668-693(0.88) 738-763(0.34) 772-797(2.58) 2087-2112(0.30) 2249-2275(1.27) 2640-2666(1.76)                   |
| gnl UG Hs#S2139665  | 3.13 | 2 1539-1564(2.82) 1744-1769(3.13)                                                                                           |
| gnl UG Hs#S4392326  | 0.45 | 2 1143-1171(0.45) 1386-1412(0.10)                                                                                           |
| gnl UG Hs#S2294451  | 4.29 | 2 388-412(1.31) 855-883(4.29)                                                                                               |
| gnl UG Hs#S2139774  | 1.3  | 4 280-305(1.30) 311-337(0.30) 386-411(0.17) 515-540(1.26)                                                                   |
| gnl UG Hs#S4435548  | 2.26 | 4 236-262(0.27) 462-487(0.36) 774-799(2.04) 850-875(2.26)                                                                   |
| gnl UG Hs#S4836434  | 0.8  | 1 501-526(0.80)                                                                                                             |
| gnl UG Hs#S3438142  | 0.1  | 1 1838-1866(0.10)                                                                                                           |
| gnl UG Hs#S2139180  | 1.47 | 1 375-403(1.47)                                                                                                             |
| gnl UG Hs#S2293347  | 4.85 | 2 281-308(2.72) 673-698(4.85)                                                                                               |
| gnl UG Hs#S3219184  | 1.01 | 1 288-314(1.01)                                                                                                             |
| gnl UG Hs#S1729659  | 0.62 | 1 776-804(0.62)                                                                                                             |
| gnl UG Hs#S3601683  | 5.36 | 3 112-137(5.36) 693-720(1.51) 1100-1125(0.16)                                                                               |
| gnl UG Hs#S4392378  | 0.53 | 1 334-359(0.53)                                                                                                             |
| gnl UG Hs#S4045830  | 3.84 | 7 84-109(1.14) 275-300(3.84) 360-385(1.65) 386-411(1.37) 464-490(0.89) 992-1018(0.50) 1109-1134(1.63)                       |
| gnl UG Hs#S2293613  | 1.85 | 3 210-235(0.81) 294-318(1.85) 596-621(0.67)                                                                                 |
| gnl UG Hs#S1728202  | 1.69 | 3 863-886(1.69) 1015-1040(0.65) 1362-1388(0.30)                                                                             |
| gnl UG Hs#S1732226  | 0.62 | 2 279-305(0.42) 337-362(0.62)                                                                                               |
| gnl UG Hs#S15636342 | 2.65 | 2 279-304(2.65) 385-413(1.49)                                                                                               |
| gnl UG Hs#S1730188  | 0.04 | 1 205-231(0.04)                                                                                                             |
| gnl UG Hs#S5930956  | 3.11 | 1 120-145(3.11)                                                                                                             |
| gnl UG Hs#S3547086  | 0.53 | 2 188-213(0.53) 534-561(0.46)                                                                                               |
| gnl UG Hs#S3438626  | 0.98 | 1 633-658(0.98)                                                                                                             |
| gnl UG Hs#S4828014  | 2.75 | 1 992-1018(2.75)                                                                                                            |
| gnl UG Hs#S4807351  | 1.3  | 1 1111-1136(1.30)                                                                                                           |
| gnl UG Hs#S1728260  | 4.36 | 2 224-249(4.36) 553-578(3.72)                                                                                               |
| gnl UG Hs#S1732207  | 4.23 | 5 241-266(4.23) 917-942(4.15) 1102-1126(0.17) 1136-1162(0.17) 1443-1470(0.24)                                               |
| gnl UG Hs#S1731145  | 0.46 | 1 195-220(0.46)                                                                                                             |
| gnl UG Hs#S1727537  | 4.13 | 2 135-160(0.50) 693-718(4.13)                                                                                               |
| gnl UG Hs#S1824562  | 2.72 | 8 26-51(2.04) 827-853(2.65) 1155-1180(1.20) 1296-1321(1.07) 1592-1620(0.53) 1911-1939(1.93) 2942-2967(2.72) 3319-3345(1.36) |
| gnl UG Hs#S2294169  | 2.56 | 5 915-940(1.11) 1037-1063(0.01) 1252-1280(0.40) 1368-1396(0.74) 1515-1543(2.56)                                             |
| gnl UG Hs#S6693359  | 0.57 | 1 566-592(0.57)                                                                                                             |
| gnl UG Hs#S3218978  | 0.2  | 1 201-229(0.20)                                                                                                             |
| gnl UG Hs#S2294306  | 2.05 | 6 1167-1192(1.46) 1207-1232(0.94) 1277-1302(2.05) 2350-2374(0.07) 2473-2498(0.30) 2536-2559(1.31)                           |
| gnl UG Hs#S12744127 | 0.57 | 2 484-511(0.28) 647-672(0.57)                                                                                               |
| gnl UG Hs#S4284542  | 0.5  | 1 214-240(0.50)                                                                                                             |
| gnl UG Hs#S1732020  | 3.93 | 8 818-843(0.65) 941-967(3.93) 970-996(0.27) 3414-3439(2.12) 3479-3507(0.66) 5462-5490(0.52) 5674-5700(0.66) 5766-5791(1.82) |
| gnl UG Hs#S1726510  | 4.82 | 2 484-510(4.82) 584-609(0.77)                                                                                               |
| gnl UG Hs#S4553557  | 0.65 | 1 204-229(0.65)                                                                                                             |
| gnl UG Hs#S2139242  | 2.81 | 1 136-164(2.81)                                                                                                             |
| gnl UG Hs#S1969027  | 0.57 | 2 1377-1402(0.57) 1406-1432(0.27)                                                                                           |
| gnl UG Hs#S7110193  | 1.23 | 2 196-221(1.23) 352-376(0.90)                                                                                               |
| gnl UG Hs#S1728696  | 2.7  | 2 248-273(2.70) 332-358(1.72)                                                                                               |
| gnl UG Hs#S3218909  | 2.56 | 3 123-148(2.56) 211-237(2.04) 350-376(2.20)                                                                                 |
| gnl UG Hs#S4435718  | 3.26 | 1 129-154(3.26)                                                                                                             |
| gnl UG Hs#S14863420 | 0.58 | 1 300-328(0.58)                                                                                                             |
| gnl UG Hs#S1729219  | 0.05 | 1 19-44(0.05)                                                                                                               |
| gnl UG Hs#S15633077 | 1.3  | 1 101-126(1.30)                                                                                                             |
| gnl UG Hs#S4553515  | 0.94 | 1 1722-1747(0.94)                                                                                                           |
| gnl UG Hs#S4044964  | 2.17 | 2 241-267(1.82) 353-379(2.17)                                                                                               |
| gnl UG Hs#S15631711 | 2.08 | 5 174-199(1.67) 244-272(1.03) 503-529(2.08) 539-565(0.04) 1102-1129(1.62)                                                   |
| gnl UG Hs#S1726667  | 2.39 | 6 145-170(1.17) 1680-1705(1.40) 2220-2245(2.39) 2379-2405(0.14) 2639-2664(0.13) 2701-2726(0.57)                             |

|                     |      |    |                                                                                                                                                                               |
|---------------------|------|----|-------------------------------------------------------------------------------------------------------------------------------------------------------------------------------|
| gnl UG Hs#S2140679  | 0.21 | 1  | 19-42(0.21)                                                                                                                                                                   |
| gnl UG Hs#S1729415  | 2.4  | 1  | 138-162(2.40)                                                                                                                                                                 |
| gnl UG Hs#S3619230  | 0.08 | 1  | 151-176(0.08)                                                                                                                                                                 |
| gnl UG Hs#S4435931  | 0.98 | 1  | 360-385(0.98)                                                                                                                                                                 |
| gnl UG Hs#S3355540  | 2.27 | 1  | 353-379(2.27)                                                                                                                                                                 |
| gnl UG Hs#S4822818  | 0.76 | 1  | 212-240(0.76)                                                                                                                                                                 |
| gnl UG Hs#S15640173 | 3.34 | 1  | 205-230(3.34)                                                                                                                                                                 |
| gnl UG Hs#S1728623  | 1.34 | 4  | 207-232(0.26) 311-337(0.89) 511-537(0.89) 750-776(1.34)                                                                                                                       |
| gnl UG Hs#S4618604  | 1.4  | 2  | 245-270(0.22) 296-321(1.40)                                                                                                                                                   |
| gnl UG Hs#S4826188  | 1.34 | 4  | 293-321(1.17) 339-364(0.45) 1859-1887(1.34) 2062-2089(0.78)                                                                                                                   |
| gnl UG Hs#S1824417  | 1.34 | 11 | 692-720(0.06) 1408-1436(0.47) 1959-1985(0.30) 2935-2960(0.66) 3075-3100(0.46) 3218-3244(1.34) 3272-3300(0.36) 3945-3972(1.03) 4494-4522(0.23) 4840-4865(0.72) 4998-5023(0.16) |
| gnl UG Hs#S1726584  | 1.46 | 2  | 64-90(1.46) 251-279(0.30)                                                                                                                                                     |
| gnl UG Hs#S1728504  | 0.78 | 1  | 198-224(0.78)                                                                                                                                                                 |
| gnl UG Hs#S2294610  | 2.47 | 5  | 439-465(1.82) 618-644(0.33) 767-790(2.47) 1969-1994(0.50) 2303-2328(1.72)                                                                                                     |
| gnl UG Hs#S5978621  | 1.68 | 2  | 762-788(0.50) 841-868(1.68)                                                                                                                                                   |
| gnl UG Hs#S5516690  | 0.65 | 2  | 459-486(0.14) 1175-1202(0.65)                                                                                                                                                 |
| gnl UG Hs#S1728534  | 1.92 | 1  | 1422-1448(1.92)                                                                                                                                                               |
| gnl UG Hs#S3543457  | 0.69 | 1  | 566-592(0.69)                                                                                                                                                                 |
| gnl UG Hs#S2139296  | 1.21 | 1  | 777-803(1.21)                                                                                                                                                                 |
| gnl UG Hs#S1727823  | 2.04 | 2  | 179-206(1.61) 449-474(2.04)                                                                                                                                                   |
| gnl UG Hs#S2293441  | 1.62 | 3  | 1941-1967(1.62) 1977-2002(0.57) 2422-2450(0.49)                                                                                                                               |
| gnl UG Hs#S2139928  | 0.69 | 2  | 461-486(0.69) 497-525(0.01)                                                                                                                                                   |
| gnl UG Hs#S1726514  | 0.36 | 1  | 375-400(0.36)                                                                                                                                                                 |
| gnl UG Hs#S3438876  | 0.72 | 2  | 289-315(0.72) 449-474(0.58)                                                                                                                                                   |
| gnl UG Hs#S1729910  | 0.76 | 4  | 757-785(0.35) 856-882(0.76) 963-988(0.04) 1323-1349(0.69)                                                                                                                     |
| gnl UG Hs#S1732267  | 0.94 | 1  | 526-553(0.94)                                                                                                                                                                 |
| gnl UG Hs#S4396078  | 2.55 | 2  | 869-894(1.43) 928-951(2.55)                                                                                                                                                   |
| gnl UG Hs#S7111249  | 1.17 | 1  | 343-368(1.17)                                                                                                                                                                 |
| gnl UG Hs#S4819973  | 1.33 | 1  | 487-512(1.33)                                                                                                                                                                 |
| gnl UG Hs#S2293394  | 1.93 | 2  | 110-136(1.93) 1364-1389(0.62)                                                                                                                                                 |
| gnl UG Hs#S4809475  | 0.4  | 1  | 1306-1332(0.40)                                                                                                                                                               |
| gnl UG Hs#S2293893  | 1.78 | 1  | 1526-1553(1.78)                                                                                                                                                               |
| gnl UG Hs#S4618095  | 0.46 | 2  | 262-287(0.46) 546-571(0.26)                                                                                                                                                   |
| gnl UG Hs#S1726627  | 1.53 | 1  | 1092-1117(1.53)                                                                                                                                                               |
| gnl UG Hs#S4807869  | 0.59 | 1  | 193-219(0.59)                                                                                                                                                                 |
| gnl UG Hs#S4001849  | 1.47 | 1  | 594-619(1.47)                                                                                                                                                                 |
| gnl UG Hs#S1732204  | 0.62 | 1  | 785-808(0.62)                                                                                                                                                                 |
| gnl UG Hs#S3547211  | 4.78 | 6  | 1456-1482(1.75) 1483-1508(2.43) 2672-2698(1.69) 3038-3063(0.65) 3168-3193(4.78) 3657-3682(3.79)                                                                               |
| gnl UG Hs#S4809409  | 5.21 | 1  | 239-264(5.21)                                                                                                                                                                 |
| gnl UG Hs#S1729778  | 1.07 | 2  | 426-450(1.07) 926-951(0.21)                                                                                                                                                   |
| gnl UG Hs#S4807868  | 0.23 | 1  | 91-116(0.23)                                                                                                                                                                  |
| gnl UG Hs#S3333495  | 3.59 | 2  | 834-859(2.68) 2060-2083(3.59)                                                                                                                                                 |
| gnl UG Hs#S1727164  | 0.27 | 1  | 1118-1141(0.27)                                                                                                                                                               |
| gnl UG Hs#S10832206 | 2.13 | 1  | 616-644(2.13)                                                                                                                                                                 |
| gnl UG Hs#S1731008  | 3.66 | 7  | 608-631(0.81) 653-678(2.89) 734-759(0.53) 1349-1375(0.98) 1966-1991(1.20) 2022-2049(3.66) 2122-2148(0.97)                                                                     |
| gnl UG Hs#S1726613  | 1.94 | 4  | 697-722(1.24) 809-834(1.94) 2325-2351(0.72) 3355-3380(1.20)                                                                                                                   |
| gnl UG Hs#S3438760  | 0.23 | 1  | 919-947(0.23)                                                                                                                                                                 |
| gnl UG Hs#S1729954  | 2.18 | 1  | 103-129(2.18)                                                                                                                                                                 |
| gnl UG Hs#S2138949  | 1.74 | 2  | 161-186(1.74) 287-312(1.50)                                                                                                                                                   |
| gnl UG Hs#S1729369  | 4.94 | 5  | 435-460(3.13) 916-941(0.39) 1455-1481(0.66) 1894-1919(0.04) 2015-2041(4.94)                                                                                                   |
| gnl UG Hs#S1731865  | 1.67 | 3  | 72-98(1.67) 130-155(1.08) 186-214(0.56)                                                                                                                                       |
| gnl UG Hs#S6664665  | 2.78 | 4  | 2751-2778(0.04) 2825-2850(2.78) 3307-3332(0.58) 3610-3636(0.91)                                                                                                               |
| gnl UG Hs#S1731263  | 1.99 | 1  | 56-84(1.99)                                                                                                                                                                   |
| gnl UG Hs#S1731270  | 1.46 | 2  | 102-127(0.89) 2119-2144(1.46)                                                                                                                                                 |

|                     |      |                                                                                                             |
|---------------------|------|-------------------------------------------------------------------------------------------------------------|
| gnl UG Hs#S3439164  | 3.62 | 2 235-260(3.62) 540-568(0.08)                                                                               |
| gnl UG Hs#S4820674  | 2.08 | 7 100-126(0.56) 182-207(1.91) 743-768(1.76) 1214-1239(2.04) 1446-1471(1.04) 2075-2103(0.81) 2649-2674(2.08) |
| gnl UG Hs#S4828946  | 1.39 | 4 1185-1210(0.72) 1524-1549(1.39) 1556-1579(0.30) 2952-2980(0.07)                                           |
| gnl UG Hs#S998753   | 1.14 | 1 210-235(1.14)                                                                                             |
| gnl UG Hs#S3220184  | 0.58 | 1 765-790(0.58)                                                                                             |
| gnl UG Hs#S10831740 | 3.17 | 2 459-484(1.82) 1002-1028(3.17)                                                                             |
| gnl UG Hs#S1727945  | 2.17 | 1 1099-1124(2.17)                                                                                           |
| gnl UG Hs#S11046685 | 4.3  | 5 181-206(4.13) 889-914(0.04) 1004-1029(0.53) 1336-1361(4.30) 2208-2233(1.53)                               |
| gnl UG Hs#S2140238  | 5.01 | 6 862-887(2.60) 1232-1257(2.36) 1290-1316(1.21) 1545-1571(5.01) 1727-1752(0.72) 1771-1799(2.08)             |
| gnl UG Hs#S2293671  | 1.85 | 2 1441-1470(1.85) 1629-1653(1.10)                                                                           |
| gnl UG Hs#S11046726 | 1.51 | 1 977-1005(1.51)                                                                                            |
| gnl UG Hs#S14273108 | 0.04 | 1 888-913(0.04)                                                                                             |
| gnl UG Hs#S5979199  | 5.04 | 6 203-228(1.98) 785-810(0.04) 909-934(0.34) 1061-1089(0.26) 1244-1269(5.04) 1477-1500(2.95)                 |
| gnl UG Hs#S12743754 | 3.5  | 2 1397-1422(1.63) 1525-1550(3.50)                                                                           |
| gnl UG Hs#S4044940  | 0.26 | 1 468-493(0.26)                                                                                             |
| gnl UG Hs#S2293697  | 1.34 | 3 2149-2177(0.42) 2252-2277(1.34) 2302-2327(0.53)                                                           |
| gnl UG Hs#S2293490  | 0.91 | 1 1158-1184(0.91)                                                                                           |
| gnl UG Hs#S3619103  | 0.49 | 1 149-177(0.49)                                                                                             |
| gnl UG Hs#S1729082  | 2.85 | 1 352-377(2.85)                                                                                             |
| gnl UG Hs#S4546302  | 2.26 | 3 48-72(2.26) 8-34(1.36) 248-276(0.30)                                                                      |
| gnl UG Hs#S4807907  | 0.5  | 1 404-428(0.50)                                                                                             |
| gnl UG Hs#S4809562  | 2.63 | 2 175-201(1.24) 313-338(2.63)                                                                               |
| gnl UG Hs#S3973109  | 1.81 | 2 172-197(1.81) 205-230(0.46)                                                                               |
| gnl UG Hs#S3814691  | 1.62 | 1 800-826(1.62)                                                                                             |
| gnl UG Hs#S1731966  | 0.94 | 2 178-203(0.94) 287-313(0.72)                                                                               |
| gnl UG Hs#S4816552  | 1.94 | 3 212-238(1.04) 595-621(1.94) 1054-1079(0.17)                                                               |
| gnl UG Hs#S10832741 | 0.14 | 1 814-839(0.14)                                                                                             |
| gnl UG Hs#S1729155  | 2.04 | 2 746-771(2.04) 810-834(0.91)                                                                               |
| gnl UG Hs#S2294290  | 0.04 | 1 540-565(0.04)                                                                                             |
| gnl UG Hs#S11046671 | 0.77 | 2 52-79(0.77) 170-195(0.50)                                                                                 |
| gnl UG Hs#S1729816  | 0.3  | 1 354-380(0.30)                                                                                             |
| gnl UG Hs#S1728303  | 0.36 | 1 606-633(0.36)                                                                                             |
| gnl UG Hs#S5978611  | 1.11 | 3 329-355(0.84) 1260-1286(0.17) 1373-1398(1.11)                                                             |
| gnl UG Hs#S3220043  | 4.4  | 3 430-456(0.39) 732-758(4.40) 1194-1218(0.23)                                                               |
| gnl UG Hs#S3322110  | 0.62 | 1 69-94(0.62)                                                                                               |
| gnl UG Hs#S2294249  | 0.71 | 2 289-317(0.71) 351-379(0.40)                                                                               |
| gnl UG Hs#S1730136  | 0.07 | 1 146-171(0.07)                                                                                             |
| gnl UG Hs#S1727358  | 0.94 | 1 208-233(0.94)                                                                                             |
| gnl UG Hs#S2294639  | 0.2  | 1 1398-1425(0.20)                                                                                           |
| gnl UG Hs#S2294548  | 4.42 | 2 519-544(0.89) 615-644(4.42)                                                                               |
| gnl UG Hs#S4807979  | 2.53 | 6 561-587(2.08) 1250-1275(0.48) 1410-1435(2.53) 1629-1654(0.21) 1767-1792(0.80) 2515-2539(0.99)             |
| gnl UG Hs#S1727607  | 0.5  | 1 1050-1076(0.50)                                                                                           |
| gnl UG Hs#S5978536  | 0.94 | 4 137-163(0.14) 583-611(0.94) 763-791(0.17) 910-936(0.33)                                                   |
| gnl UG Hs#S2140583  | 2.62 | 2 95-121(2.62) 164-189(1.80)                                                                                |
| gnl UG Hs#S4284751  | 0.84 | 1 124-149(0.84)                                                                                             |
| gnl UG Hs#S7111748  | 0.65 | 1 128-153(0.65)                                                                                             |
| gnl UG Hs#S14802293 | 6.79 | 3 162-188(0.49) 218-246(2.88) 474-499(6.79)                                                                 |
| gnl UG Hs#S15636669 | 1.13 | 2 61-86(1.13) 93-121(0.07)                                                                                  |
| gnl UG Hs#S2139853  | 3.2  | 6 2-28(2.11) 52-78(3.20) 265-292(1.74) 424-448(1.05) 535-560(3.17) 1233-1259(0.58)                          |
| gnl UG Hs#S1730964  | 3.49 | 3 478-505(0.17) 980-1006(3.49) 1040-1065(0.72)                                                              |
| gnl UG Hs#S15632409 | 0.58 | 2 1415-1440(0.11) 1482-1508(0.58)                                                                           |
| gnl UG Hs#S1824554  | 1.2  | 1 195-220(1.20)                                                                                             |
| gnl UG Hs#S4554269  | 2.46 | 2 449-474(2.46) 548-573(0.72)                                                                               |
| gnl UG Hs#S1727105  | 0.21 | 1 63-89(0.21)                                                                                               |



|                     |      |   |                                                                                                                                           |
|---------------------|------|---|-------------------------------------------------------------------------------------------------------------------------------------------|
| gnl UG Hs#S3438751  | 0.26 | 1 | 1065-1090(0.26)                                                                                                                           |
| gnl UG Hs#S2293562  | 0.23 | 1 | 539-565(0.23)                                                                                                                             |
| gnl UG Hs#S4546062  | 1.4  | 1 | 536-564(1.40)                                                                                                                             |
| gnl UG Hs#S2294265  | 3.11 | 6 | 330-358(0.81) 618-644(0.30) 681-706(1.13) 713-738(3.11) 1721-1747(0.18) 2046-2071(0.21)                                                   |
| gnl UG Hs#S5978416  | 0.2  | 1 | 67-92(0.20)                                                                                                                               |
| gnl UG Hs#S7110390  | 1.3  | 3 | 366-393(1.30) 399-427(0.30) 564-590(0.49)                                                                                                 |
| gnl UG Hs#S1729965  | 2.17 | 4 | 279-305(1.88) 667-690(2.17) 1426-1449(1.06) 1548-1573(0.98)                                                                               |
| gnl UG Hs#S1728210  | 0.23 | 1 | 239-264(0.23)                                                                                                                             |
| gnl UG Hs#S2294204  | 6.18 | 1 | 1899-1925(6.18)                                                                                                                           |
| gnl UG Hs#S10831766 | 1.72 | 1 | 117-142(1.72)                                                                                                                             |
| gnl UG Hs#S1729069  | 1.2  | 1 | 714-742(1.20)                                                                                                                             |
| gnl UG Hs#S1824527  | 3.91 | 9 | 134-161(0.27) 280-305(2.75) 355-383(1.66) 1227-1253(2.49) 1377-1401(1.78) 1504-1530(3.91) 1790-1815(0.91) 1899-1922(0.43) 2171-2197(0.62) |
| gnl UG Hs#S5978579  | 0.43 | 2 | 32-57(0.43) 200-225(0.20)                                                                                                                 |
| gnl UG Hs#S1730809  | 3.72 | 1 | 159-184(3.72)                                                                                                                             |
| gnl UG Hs#S1729909  | 1.26 | 1 | 754-782(1.26)                                                                                                                             |
| gnl UG Hs#S2294183  | 2.63 | 2 | 1016-1042(2.63) 1290-1318(0.39)                                                                                                           |
| gnl UG Hs#S2139694  | 6.24 | 2 | 35-61(0.17) 160-188(6.24)                                                                                                                 |
| gnl UG Hs#S1729806  | 0.63 | 2 | 83-109(0.60) 278-303(0.63)                                                                                                                |
| gnl UG Hs#S2329524  | 3.04 | 6 | 64-90(1.64) 150-176(1.84) 228-254(0.62) 328-354(0.50) 514-539(0.17) 577-603(3.04)                                                         |
| gnl UG Hs#S3619190  | 0.11 | 1 | 170-195(0.11)                                                                                                                             |
| gnl UG Hs#S3438767  | 2.62 | 3 | 236-260(2.62) 750-774(1.74) 908-934(0.43)                                                                                                 |
| gnl UG Hs#S3814579  | 0.17 | 1 | 82-107(0.17)                                                                                                                              |
| gnl UG Hs#S2139663  | 2.98 | 4 | 25-51(0.57) 252-277(1.50) 1442-1469(2.98) 1556-1581(0.53)                                                                                 |
| gnl UG Hs#S1729892  | 0.34 | 1 | 470-495(0.34)                                                                                                                             |
| gnl UG Hs#S1727150  | 0.61 | 1 | 77-103(0.61)                                                                                                                              |
| gnl UG Hs#S2293738  | 0.62 | 1 | 1229-1255(0.62)                                                                                                                           |
| gnl UG Hs#S2293862  | 0.72 | 1 | 234-259(0.72)                                                                                                                             |
| gnl UG Hs#S1731787  | 2.27 | 3 | 498-524(2.27) 1340-1368(0.30) 1416-1442(1.69)                                                                                             |
| gnl UG Hs#S3619000  | 2.66 | 7 | 261-288(0.15) 747-774(2.66) 821-849(0.66) 1044-1070(0.25) 1733-1758(0.21) 1894-1919(2.20) 2378-2404(2.21)                                 |
| gnl UG Hs#S2138727  | 0.37 | 1 | 261-287(0.37)                                                                                                                             |
| gnl UG Hs#S2140072  | 0.33 | 1 | 228-256(0.33)                                                                                                                             |
| gnl UG Hs#S1726652  | 4.04 | 3 | 306-331(4.04) 343-369(2.67) 403-428(2.72)                                                                                                 |
| gnl UG Hs#S4820821  | 3.07 | 3 | 1051-1078(0.11) 1421-1446(0.11) 1700-1725(3.07)                                                                                           |
| gnl UG Hs#S5978429  | 1.5  | 2 | 154-181(0.03) 297-322(1.50)                                                                                                               |
| gnl UG Hs#S3547246  | 5.11 | 1 | 1553-1578(5.11)                                                                                                                           |
| gnl UG Hs#S3355476  | 0.57 | 3 | 326-354(0.30) 573-598(0.57) 610-635(0.30)                                                                                                 |
| gnl UG Hs#S5978565  | 1.5  | 4 | 82-107(0.57) 505-531(1.50) 731-757(1.20) 1073-1098(0.30)                                                                                  |
| gnl UG Hs#S3905475  | 3.01 | 4 | 175-201(1.84) 580-605(0.46) 907-933(0.58) 1394-1420(3.01)                                                                                 |
| gnl UG Hs#S15635494 | 2.4  | 3 | 639-664(2.40) 670-696(1.82) 1027-1055(0.02)                                                                                               |
| gnl UG Hs#S4623171  | 0.14 | 2 | 835-863(0.14) 1372-1400(0.07)                                                                                                             |
| gnl UG Hs#S5931202  | 2.72 | 1 | 792-819(2.72)                                                                                                                             |
| gnl UG Hs#S4630852  | 0.18 | 1 | 210-235(0.18)                                                                                                                             |
| gnl UG Hs#S1730218  | 1.75 | 1 | 21-46(1.75)                                                                                                                               |
| gnl UG Hs#S1726872  | 1.82 | 1 | 303-329(1.82)                                                                                                                             |
| gnl UG Hs#S15632306 | 1.98 | 1 | 248-274(1.98)                                                                                                                             |
| gnl UG Hs#S1731099  | 0.34 | 2 | 172-198(0.34) 229-254(0.26)                                                                                                               |
| gnl UG Hs#S1728587  | 0.76 | 2 | 16-42(0.21) 117-142(0.76)                                                                                                                 |
| gnl UG Hs#S1726978  | 1.48 | 3 | 43-69(1.48) 1147-1170(0.47) 1281-1306(0.15)                                                                                               |
| gnl UG Hs#S1727985  | 3.3  | 2 | 2776-2802(3.30) 3393-3420(1.36)                                                                                                           |
| gnl UG Hs#S1729576  | 0.26 | 1 | 2375-2402(0.26)                                                                                                                           |
| gnl UG Hs#S2293607  | 0.82 | 1 | 928-952(0.82)                                                                                                                             |
| gnl UG Hs#S2139082  | 1.85 | 1 | 297-325(1.85)                                                                                                                             |
| gnl UG Hs#S5931214  | 4.08 | 6 | 389-414(0.43) 487-514(0.04) 521-546(1.53) 782-807(2.79) 854-879(0.87) 917-943(4.08)                                                       |
| gnl UG Hs#S5931250  | 0.14 | 1 | 111-136(0.14)                                                                                                                             |

|                     |      |                                                                                                                                                                                             |
|---------------------|------|---------------------------------------------------------------------------------------------------------------------------------------------------------------------------------------------|
| gnl UG Hs#S3940253  | 2.01 | 15 37-62(0.14) 84-109(0.23) 1909-1934(0.91) 2359-2384(1.68) 2875-2900(2.01) 3366-3394(1.03) 3775-3800(0.48) 3864-3890(0.58) 3979-4005(0.08) 4894-4919(1.33) 5051-5077(0.24) 5241-5266(0.14) |
| gnl UG Hs#S1824536  | 0.21 | 1 502-526(0.21)                                                                                                                                                                             |
| gnl UG Hs#S3603817  | 2.08 | 1 441-467(2.08)                                                                                                                                                                             |
| gnl UG Hs#S2139525  | 2.04 | 1 2299-2324(2.04)                                                                                                                                                                           |
| gnl UG Hs#S3990786  | 1.55 | 2 291-316(0.90) 1207-1234(1.55)                                                                                                                                                             |
| gnl UG Hs#S2140440  | 2.07 | 4 219-247(0.15) 335-360(0.43) 374-399(2.07) 463-488(0.72)                                                                                                                                   |
| gnl UG Hs#S3782061  | 2.86 | 1 28-54(2.86)                                                                                                                                                                               |
| gnl UG Hs#S4545892  | 0.36 | 2 98-123(0.36) 286-311(0.20)                                                                                                                                                                |
| gnl UG Hs#S2294515  | 0.94 | 2 498-523(0.94) 549-577(0.88)                                                                                                                                                               |
| gnl UG Hs#S4817007  | 2.71 | 3 645-673(0.30) 1489-1517(2.71) 1564-1588(0.11)                                                                                                                                             |
| gnl UG Hs#S1969057  | 3.3  | 1 2280-2306(3.30)                                                                                                                                                                           |
| gnl UG Hs#S1727299  | 0.76 | 3 158-186(0.23) 1672-1700(0.76) 2231-2256(0.07)                                                                                                                                             |
| gnl UG Hs#S1730975  | 2.3  | 1 508-533(2.30)                                                                                                                                                                             |
| gnl UG Hs#S3219031  | 0.82 | 5 300-325(0.23) 352-377(0.32) 454-479(0.30) 747-775(0.56) 838-863(0.82)                                                                                                                     |
| gnl UG Hs#S1728902  | 1.23 | 3 114-142(1.23) 430-456(0.26) 521-546(0.46)                                                                                                                                                 |
| gnl UG Hs#S4284565  | 4.2  | 7 232-260(2.13) 1407-1432(1.60) 1861-1885(4.20) 1916-1941(0.26) 2221-2247(0.58) 2736-2759(0.08) 2902-2927(1.47)                                                                             |
| gnl UG Hs#S1569375  | 4.51 | 4 89-115(4.51) 277-302(1.87) 380-405(2.48) 721-746(0.23)                                                                                                                                    |
| gnl UG Hs#S3814599  | 3.4  | 1 649-675(3.40)                                                                                                                                                                             |
| gnl UG Hs#S2139786  | 2.58 | 3 366-391(0.26) 763-789(0.08) 846-871(2.58)                                                                                                                                                 |
| gnl UG Hs#S1569310  | 1.42 | 2 3225-3253(1.42) 3475-3500(1.25)                                                                                                                                                           |
| gnl UG Hs#S6682826  | 5.21 | 3 1335-1361(3.82) 1362-1387(5.21) 1557-1581(1.32)                                                                                                                                           |
| gnl UG Hs#S1824286  | 4.85 | 2 99-124(4.85) 149-175(3.03)                                                                                                                                                                |
| gnl UG Hs#S4831108  | 1.69 | 2 81-107(1.69) 108-134(0.91)                                                                                                                                                                |
| gnl UG Hs#S3814531  | 1.82 | 5 137-163(0.17) 590-615(0.43) 900-924(1.53) 935-960(1.50) 1139-1165(1.82)                                                                                                                   |
| gnl UG Hs#S1730050  | 0.04 | 1 336-362(0.04)                                                                                                                                                                             |
| gnl UG Hs#S7111394  | 3.52 | 6 596-621(3.52) 651-676(0.50) 785-811(1.60) 1242-1270(0.20) 1590-1616(2.10) 1772-1798(3.01)                                                                                                 |
| gnl UG Hs#S1971587  | 0.17 | 1 920-946(0.17)                                                                                                                                                                             |
| gnl UG Hs#S4546012  | 2.89 | 1 349-374(2.89)                                                                                                                                                                             |
| gnl UG Hs#S1824452  | 1.77 | 2 383-411(0.40) 1213-1239(1.77)                                                                                                                                                             |
| gnl UG Hs#S1728104  | 2.78 | 1 1508-1533(2.78)                                                                                                                                                                           |
| gnl UG Hs#S11046543 | 3.73 | 4 431-457(3.73) 647-670(0.30) 904-930(0.54) 1007-1034(0.41)                                                                                                                                 |
| gnl UG Hs#S7112758  | 2.62 | 1 405-430(2.62)                                                                                                                                                                             |
| gnl UG Hs#S2139019  | 1.08 | 2 672-697(0.78) 718-746(1.08)                                                                                                                                                               |
| gnl UG Hs#S3987292  | 1.4  | 4 316-342(1.23) 793-821(0.65) 1390-1418(0.42) 1944-1969(1.40)                                                                                                                               |
| gnl UG Hs#S2294549  | 1.04 | 1 1538-1564(1.04)                                                                                                                                                                           |
| gnl UG Hs#S1728926  | 1.08 | 2 1401-1427(1.08) 1446-1471(0.58)                                                                                                                                                           |
| gnl UG Hs#S5978677  | 2.5  | 4 335-360(0.04) 687-712(2.50) 1005-1031(1.65) 1914-1939(0.13)                                                                                                                               |
| gnl UG Hs#S3219650  | 5.3  | 4 648-676(0.17) 1044-1070(1.40) 1119-1144(5.30) 1439-1463(0.56)                                                                                                                             |
| gnl UG Hs#S3603171  | 2.04 | 1 145-171(2.04)                                                                                                                                                                             |
| gnl UG Hs#S4807744  | 1.24 | 1 367-392(1.24)                                                                                                                                                                             |
| gnl UG Hs#S2293434  | 3.65 | 3 770-796(1.94) 1044-1069(3.65) 1922-1948(1.08)                                                                                                                                             |
| gnl UG Hs#S1730081  | 1.87 | 1 137-161(1.87)                                                                                                                                                                             |
| gnl UG Hs#S3219988  | 0.01 | 1 817-843(0.01)                                                                                                                                                                             |
| gnl UG Hs#S1728138  | 0.78 | 2 641-669(0.21) 786-811(0.78)                                                                                                                                                               |
| gnl UG Hs#S1729669  | 0.65 | 1 313-338(0.65)                                                                                                                                                                             |
| gnl UG Hs#S2139641  | 0.19 | 1 1384-1408(0.19)                                                                                                                                                                           |
| gnl UG Hs#S2293963  | 0.08 | 1 274-300(0.08)                                                                                                                                                                             |
| gnl UG Hs#S4396070  | 2.04 | 6 259-282(0.73) 1752-1777(0.40) 2952-2977(0.55) 2991-3017(2.01) 3018-3042(2.04) 3494-3523(0.40)                                                                                             |
| gnl UG Hs#S4825665  | 4.43 | 10 208-236(1.40) 905-929(1.22) 1341-1366(0.82) 1594-1621(0.88) 1672-1697(1.41) 2095-2120(0.83) 2765-2790(0.04) 2990-3015(4.43) 3259-3284(2.97) 3341-3366(2.21)                              |
| gnl UG Hs#S15631582 | 0.81 | 1 2124-2151(0.81)                                                                                                                                                                           |
| gnl UG Hs#S4824755  | 2.46 | 9 68-96(0.07) 153-178(0.72) 543-569(0.89) 1607-1632(0.72) 2109-2134(2.46) 2366-2392(1.04) 2573-2599(0.07) 2611-2637(1.17) 2639-2664(1.33)                                                   |
| gnl UG Hs#S4631511  | 1.17 | 2 1207-1232(1.17) 1307-1332(0.40)                                                                                                                                                           |
| gnl UG Hs#S14273038 | 1.24 | 1 324-347(1.24)                                                                                                                                                                             |
| gnl UG Hs#S12744109 | 2.94 | 3 1552-1577(1.57) 1587-1612(0.84) 1634-1659(2.94)                                                                                                                                           |

|                     |      |                                                                                                                                                            |
|---------------------|------|------------------------------------------------------------------------------------------------------------------------------------------------------------|
| gnl UG Hs#S1726926  | 1.72 | 1 179-203(1.72)                                                                                                                                            |
| gnl UG Hs#S3973042  | 0.71 | 2 190-217(0.50) 625-653(0.71)                                                                                                                              |
| gnl UG Hs#S4807946  | 1.79 | 2 134-159(0.30) 305-331(1.79)                                                                                                                              |
| gnl UG Hs#S2293413  | 1.3  | 3 803-831(0.08) 1358-1383(0.53) 1615-1641(1.30)                                                                                                            |
| gnl UG Hs#S2293233  | 2.38 | 1 370-397(2.38)                                                                                                                                            |
| gnl UG Hs#S1730414  | 0.7  | 1 1982-2006(0.70)                                                                                                                                          |
| gnl UG Hs#S14272713 | 4.87 | 8 633-658(4.87) 674-697(1.28) 947-972(3.89) 987-1010(2.31) 1023-1049(3.04) 1246-1271(0.30) 1303-1328(2.78) 1476-1504(1.81)                                 |
| gnl UG Hs#S14802411 | 0.46 | 1 147-172(0.46)                                                                                                                                            |
| gnl UG Hs#S2293381  | 0.67 | 4 372-396(0.07) 416-442(0.30) 497-522(0.67) 921-946(0.17)                                                                                                  |
| gnl UG Hs#S2293916  | 1.2  | 1 90-116(1.20)                                                                                                                                             |
| gnl UG Hs#S1729253  | 1.2  | 2 206-231(0.11) 520-545(1.20)                                                                                                                              |
| gnl UG Hs#S1726884  | 0.33 | 1 336-362(0.33)                                                                                                                                            |
| gnl UG Hs#S5978852  | 1.63 | 3 590-616(1.63) 1469-1494(1.53) 2544-2570(0.69)                                                                                                            |
| gnl UG Hs#S1730392  | 3.3  | 1 167-192(3.30)                                                                                                                                            |
| gnl UG Hs#S1728304  | 1.6  | 1 11-36(1.60)                                                                                                                                              |
| gnl UG Hs#S4620226  | 2.21 | 3 929-954(2.21) 1273-1298(1.82) 1615-1643(0.42)                                                                                                            |
| gnl UG Hs#S1727924  | 5.04 | 2 753-778(5.04) 2275-2301(0.59)                                                                                                                            |
| gnl UG Hs#S2294200  | 6.18 | 1 1899-1925(6.18)                                                                                                                                          |
| gnl UG Hs#S3547258  | 3.08 | 3 565-590(1.98) 596-622(3.08) 782-808(0.86)                                                                                                                |
| gnl UG Hs#S2293925  | 0.94 | 1 442-467(0.94)                                                                                                                                            |
| gnl UG Hs#S12744111 | 3.72 | 3 699-723(0.40) 1085-1110(3.72) 1728-1754(1.62)                                                                                                            |
| gnl UG Hs#S1824337  | 0.81 | 1 724-749(0.81)                                                                                                                                            |
| gnl UG Hs#S7112489  | 2.27 | 1 762-788(2.27)                                                                                                                                            |
| gnl UG Hs#S1824358  | 1.48 | 2 786-811(0.78) 1024-1049(1.48)                                                                                                                            |
| gnl UG Hs#S3782171  | 0.22 | 1 175-200(0.22)                                                                                                                                            |
| gnl UG Hs#S14813041 | 0.17 | 1 343-369(0.17)                                                                                                                                            |
| gnl UG Hs#S15639579 | 7.43 | 2 913-938(7.43) 1584-1612(0.56)                                                                                                                            |
| gnl UG Hs#S3439165  | 0.94 | 2 100-124(0.18) 2695-2721(0.94)                                                                                                                            |
| gnl UG Hs#S5978485  | 5.73 | 10 154-177(1.81) 361-384(0.53) 636-661(2.50) 907-932(3.36) 1462-1487(1.89) 1831-1860(1.30) 1929-1954(2.90) 2067-2095(1.30) 2264-2288(5.73) 2522-2547(2.04) |
| gnl UG Hs#S1729093  | 1.91 | 1 36-62(1.91)                                                                                                                                              |
| gnl UG Hs#S4396121  | 2.69 | 3 882-905(0.62) 947-974(2.69) 1113-1139(0.34)                                                                                                              |
| gnl UG Hs#S4631285  | 3.19 | 3 105-130(0.13) 156-182(3.19) 1089-1114(2.57)                                                                                                              |
| gnl UG Hs#S4392126  | 1.58 | 2 886-912(0.76) 937-962(1.58)                                                                                                                              |
| gnl UG Hs#S2139170  | 4.29 | 1 1441-1466(4.29)                                                                                                                                          |
| gnl UG Hs#S1729199  | 2.3  | 6 337-362(1.11) 534-559(2.30) 561-586(0.36) 865-890(1.46) 1542-1568(1.50) 1584-1611(0.24)                                                                  |
| gnl UG Hs#S1731044  | 0.91 | 2 232-257(0.91) 417-442(0.33)                                                                                                                              |
| gnl UG Hs#S2140009  | 0.98 | 1 283-309(0.98)                                                                                                                                            |
| gnl UG Hs#S1730254  | 1.08 | 1 895-921(1.08)                                                                                                                                            |
| gnl UG Hs#S7112283  | 0.91 | 1 4126-4151(0.91)                                                                                                                                          |
| gnl UG Hs#S1730967  | 1.4  | 1 136-161(1.40)                                                                                                                                            |
| gnl UG Hs#S1728185  | 0.67 | 1 127-152(0.67)                                                                                                                                            |
| gnl UG Hs#S1730820  | 1.23 | 1 30-56(1.23)                                                                                                                                              |
| gnl UG Hs#S5979204  | 1.91 | 2 201-226(1.46) 235-261(1.91)                                                                                                                              |
| gnl UG Hs#S10832656 | 0.38 | 1 1521-1546(0.38)                                                                                                                                          |
| gnl UG Hs#S4825471  | 2.58 | 3 1049-1074(2.58) 1641-1666(1.23) 1926-1952(2.13)                                                                                                          |
| gnl UG Hs#S1729454  | 1.64 | 5 126-151(0.50) 214-241(1.39) 411-436(1.57) 577-602(0.16) 682-705(1.64)                                                                                    |
| gnl UG Hs#S5860317  | 3.46 | 1 1183-1208(3.46)                                                                                                                                          |
| gnl UG Hs#S2139954  | 0.76 | 3 253-280(0.62) 878-904(0.76) 1168-1193(0.17)                                                                                                              |
| gnl UG Hs#S2293279  | 1.8  | 2 469-494(0.80) 1127-1152(1.80)                                                                                                                            |
| gnl UG Hs#S3547093  | 2.75 | 1 916-942(2.75)                                                                                                                                            |
| gnl UG Hs#S1727193  | 0.89 | 1 5-28(0.89)                                                                                                                                               |
| gnl UG Hs#S1730301  | 1.27 | 2 747-772(0.40) 795-821(1.27)                                                                                                                              |
| gnl UG Hs#S4813036  | 0.57 | 1 1244-1270(0.57)                                                                                                                                          |
| gnl UG Hs#S2294071  | 1.29 | 2 60-88(0.97) 432-457(1.29)                                                                                                                                |

|                     |      |   |                                                                                                                               |
|---------------------|------|---|-------------------------------------------------------------------------------------------------------------------------------|
| gnl UG Hs#S2293772  | 0.04 | 1 | 762-788(0.04)                                                                                                                 |
| gnl UG Hs#S2293435  | 3.15 | 4 | 976-1002(0.90) 1224-1250(3.15) 1261-1286(1.78) 1337-1362(1.04)                                                                |
| gnl UG Hs#S1728822  | 0.65 | 1 | 253-279(0.65)                                                                                                                 |
| gnl UG Hs#S2139192  | 2.08 | 3 | 408-436(0.48) 643-668(0.46) 678-703(2.08)                                                                                     |
| gnl UG Hs#S4392401  | 1.46 | 1 | 1158-1183(1.46)                                                                                                               |
| gnl UG Hs#S1971573  | 3.07 | 2 | 914-938(3.07) 1291-1317(2.99)                                                                                                 |
| gnl UG Hs#S4807672  | 2.98 | 4 | 50-75(0.43) 974-1002(0.18) 1364-1389(0.85) 1394-1419(2.98)                                                                    |
| gnl UG Hs#S1729660  | 2.27 | 1 | 135-161(2.27)                                                                                                                 |
| gnl UG Hs#S2138948  | 1.5  | 1 | 1978-2003(1.50)                                                                                                               |
| gnl UG Hs#S3603080  | 4.36 | 1 | 1824-1849(4.36)                                                                                                               |
| gnl UG Hs#S14272913 | 3.63 | 1 | 725-750(3.63)                                                                                                                 |
| gnl UG Hs#S3439078  | 2.17 | 6 | 69-94(2.17) 360-383(0.17) 474-502(0.81) 519-545(1.82) 550-578(0.30) 959-985(0.08)                                             |
| gnl UG Hs#S4618634  | 1.68 | 3 | 1190-1217(1.15) 1509-1534(1.68) 1918-1944(0.36)                                                                               |
| gnl UG Hs#S2138998  | 2.25 | 2 | 539-562(2.25) 805-830(1.68)                                                                                                   |
| gnl UG Hs#S1729872  | 0.81 | 4 | 26-53(0.16) 261-286(0.04) 627-657(0.81) 745-771(0.40)                                                                         |
| gnl UG Hs#S2294266  | 2.19 | 1 | 54-79(2.19)                                                                                                                   |
| gnl UG Hs#S2139420  | 2.45 | 2 | 664-689(0.21) 694-718(2.45)                                                                                                   |
| gnl UG Hs#S2140328  | 1.56 | 3 | 2511-2536(0.03) 3273-3302(0.97) 5139-5167(1.56)                                                                               |
| gnl UG Hs#S1730308  | 1.72 | 1 | 619-644(1.72)                                                                                                                 |
| gnl UG Hs#S3987716  | 0.57 | 2 | 345-371(0.57) 840-865(0.11)                                                                                                   |
| gnl UG Hs#S1730398  | 1.04 | 1 | 508-533(1.04)                                                                                                                 |
| gnl UG Hs#S3438718  | 2.04 | 4 | 11-36(1.10) 57-83(2.04) 2334-2359(0.30) 2539-2565(1.69)                                                                       |
| gnl UG Hs#S2139203  | 0.67 | 2 | 1358-1385(0.26) 1478-1503(0.67)                                                                                               |
| gnl UG Hs#S3438118  | 1.5  | 2 | 2500-2523(0.01) 3023-3049(1.50)                                                                                               |
| gnl UG Hs#S5931019  | 1.46 | 4 | 584-610(0.13) 873-898(1.46) 965-990(0.50) 1147-1174(0.72)                                                                     |
| gnl UG Hs#S2293581  | 2.33 | 4 | 169-193(1.04) 266-290(1.77) 634-659(0.14) 781-806(2.33)                                                                       |
| gnl UG Hs#S4630829  | 1.84 | 2 | 69-94(1.84) 132-158(0.54)                                                                                                     |
| gnl UG Hs#S15631469 | 2.21 | 5 | 659-684(2.21) 943-969(1.40) 1097-1121(0.09) 1185-1210(1.98) 1301-1326(0.25)                                                   |
| gnl UG Hs#S1729848  | 0.04 | 1 | 468-493(0.04)                                                                                                                 |
| gnl UG Hs#S1727224  | 3.26 | 1 | 120-146(3.26)                                                                                                                 |
| gnl UG Hs#S1244968  | 0.3  | 1 | 911-937(0.30)                                                                                                                 |
| gnl UG Hs#S1730465  | 1.12 | 1 | 513-538(1.12)                                                                                                                 |
| gnl UG Hs#S3218952  | 0.49 | 1 | 544-571(0.49)                                                                                                                 |
| gnl UG Hs#S3987985  | 2.89 | 3 | 363-386(0.11) 542-570(0.44) 667-693(2.89)                                                                                     |
| gnl UG Hs#S1731914  | 2.09 | 4 | 398-424(1.50) 3441-3469(2.09) 3682-3710(0.03) 4786-4811(0.48)                                                                 |
| gnl UG Hs#S3219183  | 5.52 | 8 | 903-929(1.23) 1110-1136(1.50) 1285-1313(5.52) 1686-1711(1.20) 2586-2612(4.83) 3319-3343(1.15) 3454-3479(0.40) 3618-3643(1.65) |
| gnl UG Hs#S3219933  | 1.14 | 1 | 1050-1075(1.14)                                                                                                               |
| gnl UG Hs#S1728077  | 2.34 | 1 | 408-434(2.34)                                                                                                                 |
| gnl UG Hs#S1727524  | 0.5  | 3 | 127-154(0.24) 288-313(0.14) 342-367(0.50)                                                                                     |
| gnl UG Hs#S3438853  | 0.98 | 2 | 48-73(0.32) 1005-1030(0.98)                                                                                                   |
| gnl UG Hs#S2139449  | 3.08 | 2 | 442-468(3.08) 2249-2275(0.30)                                                                                                 |
| gnl UG Hs#S15634006 | 2.95 | 1 | 872-897(2.95)                                                                                                                 |
| gnl UG Hs#S4818047  | 0.65 | 1 | 1123-1148(0.65)                                                                                                               |
| gnl UG Hs#S5930814  | 0.18 | 1 | 719-746(0.18)                                                                                                                 |
| gnl UG Hs#S2293587  | 0.11 | 1 | 316-341(0.11)                                                                                                                 |
| gnl UG Hs#S1731432  | 1.27 | 1 | 319-345(1.27)                                                                                                                 |
| gnl UG Hs#S14802402 | 0.94 | 2 | 670-695(0.94) 786-812(0.02)                                                                                                   |
| gnl UG Hs#S1726243  | 0.91 | 1 | 80-108(0.91)                                                                                                                  |
| gnl UG Hs#S2138733  | 0.24 | 1 | 299-325(0.24)                                                                                                                 |
| gnl UG Hs#S3619302  | 5.95 | 1 | 282-307(5.95)                                                                                                                 |
| gnl UG Hs#S1727011  | 0.2  | 2 | 251-277(0.14) 360-385(0.20)                                                                                                   |
| gnl UG Hs#S3817938  | 2.97 | 1 | 19-44(2.97)                                                                                                                   |
| gnl UG Hs#S2139533  | 1.6  | 2 | 3166-3192(1.60) 3387-3413(1.01)                                                                                               |
| gnl UG Hs#S4807687  | 1.26 | 2 | 1759-1785(1.26) 2005-2035(0.45)                                                                                               |

|                     |      |                                                                                                                             |
|---------------------|------|-----------------------------------------------------------------------------------------------------------------------------|
| gnl UG Hs#S11046580 | 1.97 | 2 898-923(0.57) 1509-1534(1.97)                                                                                             |
| gnl UG Hs#S2139854  | 2.2  | 2 7-32(2.20) 133-159(0.37)                                                                                                  |
| gnl UG Hs#S2139003  | 1.4  | 2 978-1002(1.40) 1108-1134(1.08)                                                                                            |
| gnl UG Hs#S2138896  | 2.75 | 1 62-87(2.75)                                                                                                               |
| gnl UG Hs#S14812306 | 0.17 | 1 305-330(0.17)                                                                                                             |
| gnl UG Hs#S3991628  | 0.62 | 1 2168-2194(0.62)                                                                                                           |
| gnl UG Hs#S15643757 | 1.52 | 6 278-303(0.26) 667-695(1.18) 830-858(1.52) 956-981(1.11) 1146-1172(0.98) 1341-1368(0.88)                                   |
| gnl UG Hs#S12743819 | 0.14 | 1 264-289(0.14)                                                                                                             |
| gnl UG Hs#S4620930  | 0.68 | 1 481-506(0.68)                                                                                                             |
| gnl UG Hs#S3218906  | 3.33 | 2 475-503(3.33) 649-672(0.75)                                                                                               |
| gnl UG Hs#S3439067  | 1.32 | 1 662-688(1.32)                                                                                                             |
| gnl UG Hs#S1727222  | 1.92 | 1 1154-1180(1.92)                                                                                                           |
| gnl UG Hs#S3219361  | 2.3  | 3 693-719(0.29) 776-802(2.30) 888-916(0.84)                                                                                 |
| gnl UG Hs#S4807637  | 0.89 | 1 1526-1552(0.89)                                                                                                           |
| gnl UG Hs#S3219826  | 0.56 | 4 599-625(0.27) 1002-1030(0.23) 1318-1344(0.30) 1415-1443(0.56)                                                             |
| gnl UG Hs#S4812637  | 0.15 | 1 46-71(0.15)                                                                                                               |
| gnl UG Hs#S4631311  | 3.49 | 5 250-276(3.49) 763-786(1.92) 1202-1227(2.75) 2008-2031(2.95) 2049-2074(0.91)                                               |
| gnl UG Hs#S2329518  | 3.72 | 4 445-471(2.56) 857-882(0.50) 1471-1496(3.72) 1603-1631(2.84)                                                               |
| gnl UG Hs#S4545968  | 0.23 | 1 106-130(0.23)                                                                                                             |
| gnl UG Hs#S4435363  | 1.72 | 1 344-372(1.72)                                                                                                             |
| gnl UG Hs#S10832085 | 2.65 | 4 237-264(2.65) 2188-2216(2.47) 4203-4226(0.94) 4341-4366(0.82)                                                             |
| gnl UG Hs#S4613702  | 0.72 | 1 821-846(0.72)                                                                                                             |
| gnl UG Hs#S1727630  | 2.97 | 5 598-623(2.97) 636-664(0.62) 1418-1444(1.08) 1454-1479(2.37) 1787-1815(2.23)                                               |
| gnl UG Hs#S2140308  | 1.1  | 1 139-164(1.10)                                                                                                             |
| gnl UG Hs#S3219894  | 3.67 | 3 418-443(1.17) 549-575(3.67) 727-755(0.62)                                                                                 |
| gnl UG Hs#S2140409  | 1.47 | 7 190-219(1.23) 478-503(0.24) 908-935(0.81) 961-987(1.47) 1195-1220(1.11) 1671-1697(0.13) 1755-1780(1.20)                   |
| gnl UG Hs#S1726847  | 2.53 | 2 144-169(2.53) 341-367(0.59)                                                                                               |
| gnl UG Hs#S7111565  | 1.3  | 2 110-135(1.30) 325-350(0.43)                                                                                               |
| gnl UG Hs#S1731299  | 2.33 | 3 349-376(0.98) 912-937(2.33) 1872-1898(1.87)                                                                               |
| gnl UG Hs#S4815177  | 3.78 | 6 652-677(0.22) 736-761(3.78) 1783-1808(0.07) 2066-2092(1.59) 2575-2602(0.88) 3096-3122(0.40)                               |
| gnl UG Hs#S5978409  | 1.98 | 3 751-776(0.75) 1311-1335(0.27) 1535-1560(1.98)                                                                             |
| gnl UG Hs#S1728349  | 2.07 | 2 226-251(1.30) 644-669(2.07)                                                                                               |
| gnl UG Hs#S1730941  | 4.53 | 1 97-122(4.53)                                                                                                              |
| gnl UG Hs#S1731200  | 0.65 | 1 1475-1501(0.65)                                                                                                           |
| gnl UG Hs#S5978524  | 2.68 | 2 1004-1029(0.16) 1719-1744(2.68)                                                                                           |
| gnl UG Hs#S1824362  | 9.17 | 2 320-345(9.17) 636-664(0.13)                                                                                               |
| gnl UG Hs#S1728935  | 0.34 | 2 835-861(0.34) 872-899(0.27)                                                                                               |
| gnl UG Hs#S1729190  | 5.11 | 3 1614-1639(0.58) 2096-2121(5.11) 3384-3409(1.30)                                                                           |
| gnl UG Hs#S1732378  | 0.47 | 1 446-471(0.47)                                                                                                             |
| gnl UG Hs#S1729410  | 3.19 | 3 1265-1291(2.17) 1389-1415(1.27) 1432-1457(3.19)                                                                           |
| gnl UG Hs#S2139577  | 0.83 | 1 1026-1052(0.83)                                                                                                           |
| gnl UG Hs#S4615447  | 1.5  | 1 288-313(1.50)                                                                                                             |
| gnl UG Hs#S3355459  | 0.72 | 1 916-941(0.72)                                                                                                             |
| gnl UG Hs#S1732276  | 1.23 | 4 508-534(1.01) 986-1011(0.30) 1092-1120(0.40) 1363-1391(1.23)                                                              |
| gnl UG Hs#S3355643  | 2.82 | 1 237-263(2.82)                                                                                                             |
| gnl UG Hs#S1727018  | 1.79 | 8 554-579(1.04) 647-675(0.98) 891-916(1.79) 1121-1146(0.46) 1171-1196(0.20) 1453-1478(1.53) 1929-1954(0.59) 2776-2801(0.89) |
| gnl UG Hs#S2140310  | 0.04 | 1 73-100(0.04)                                                                                                              |
| gnl UG Hs#S2294300  | 0.78 | 1 1020-1045(0.78)                                                                                                           |
| gnl UG Hs#S3973045  | 3.43 | 1 50-75(3.43)                                                                                                               |
| gnl UG Hs#S3438182  | 0.21 | 1 1283-1308(0.21)                                                                                                           |
| gnl UG Hs#S15640830 | 0.94 | 1 540-565(0.94)                                                                                                             |
| gnl UG Hs#S4630974  | 0.98 | 1 367-392(0.98)                                                                                                             |
| gnl UG Hs#S1728601  | 1.3  | 2 362-388(0.49) 450-475(1.30)                                                                                               |
| gnl UG Hs#S4620413  | 3.62 | 3 503-528(0.91) 1406-1431(3.62) 1506-1532(2.67)                                                                             |

|                     |      |                                                                                                                                                                                            |
|---------------------|------|--------------------------------------------------------------------------------------------------------------------------------------------------------------------------------------------|
| gnl UG Hs#S4807845  | 2.08 | 9 26-51(0.14) 56-79(0.20) 89-114(0.48) 144-169(0.30) 503-530(1.64) 670-695(1.13) 711-737(1.82) 985-1011(2.08) 1202-1231(0.73)                                                              |
| gnl UG Hs#S4045158  | 0.23 | 1 299-324(0.23)                                                                                                                                                                            |
| gnl UG Hs#S4807974  | 1.66 | 1 808-833(1.66)                                                                                                                                                                            |
| gnl UG Hs#S4824935  | 3.77 | 4 882-906(3.77) 1112-1137(2.30) 1777-1802(0.68) 2462-2487(0.53)                                                                                                                            |
| gnl UG Hs#S1824263  | 3.98 | 1 326-351(3.98)                                                                                                                                                                            |
| gnl UG Hs#S3322128  | 0.28 | 1 569-594(0.28)                                                                                                                                                                            |
| gnl UG Hs#S1727598  | 1.72 | 4 239-265(0.08) 594-620(1.72) 697-723(0.08) 1102-1129(0.33)                                                                                                                                |
| gnl UG Hs#S4829506  | 0.24 | 2 1170-1195(0.24) 1750-1773(0.18)                                                                                                                                                          |
| gnl UG Hs#S11046594 | 3.49 | 5 211-236(3.49) 304-330(0.39) 957-984(0.97) 1101-1126(1.30) 1691-1718(1.99)                                                                                                                |
| gnl UG Hs#S4545962  | 2.26 | 4 509-535(0.59) 551-575(2.26) 608-631(0.41) 680-707(1.63)                                                                                                                                  |
| gnl UG Hs#S1731564  | 3.69 | 5 435-460(0.07) 592-617(2.17) 1227-1252(3.69) 1314-1342(2.62) 2220-2245(2.13)                                                                                                              |
| gnl UG Hs#S2140670  | 2.33 | 3 574-602(0.68) 920-946(2.33) 1131-1156(1.50)                                                                                                                                              |
| gnl UG Hs#S3438441  | 1.36 | 1 160-186(1.36)                                                                                                                                                                            |
| gnl UG Hs#S2138856  | 0.76 | 1 14-40(0.76)                                                                                                                                                                              |
| gnl UG Hs#S2294371  | 0.21 | 1 494-522(0.21)                                                                                                                                                                            |
| gnl UG Hs#S2329523  | 0.62 | 1 245-272(0.62)                                                                                                                                                                            |
| gnl UG Hs#S15644497 | 0.58 | 1 123-148(0.58)                                                                                                                                                                            |
| gnl UG Hs#S2293363  | 0.2  | 1 773-798(0.20)                                                                                                                                                                            |
| gnl UG Hs#S1726479  | 0.65 | 4 256-282(0.49) 380-405(0.57) 464-490(0.65) 1640-1665(0.04)                                                                                                                                |
| gnl UG Hs#S1728679  | 4.97 | 8 123-149(1.83) 173-199(1.36) 507-536(4.97) 752-777(4.57) 903-931(1.88) 1335-1362(1.20) 1382-1408(3.26) 1451-1476(0.72)                                                                    |
| gnl UG Hs#S3603137  | 3.3  | 1 122-147(3.30)                                                                                                                                                                            |
| gnl UG Hs#S14902448 | 2.18 | 5 354-382(0.23) 570-595(0.58) 1118-1144(2.18) 1913-1939(0.18) 1941-1966(1.08)                                                                                                              |
| gnl UG Hs#S4284784  | 0.87 | 1 375-400(0.87)                                                                                                                                                                            |
| gnl UG Hs#S1824321  | 2.24 | 2 83-107(0.62) 1107-1135(2.24)                                                                                                                                                             |
| gnl UG Hs#S1730910  | 2.5  | 8 137-160(0.91) 303-328(0.15) 681-706(2.50) 885-910(0.49) 1098-1126(0.05) 1696-1721(0.30) 1763-1791(0.08) 1883-1911(1.40)                                                                  |
| gnl UG Hs#S2139417  | 2.23 | 5 554-579(0.24) 1084-1112(1.23) 1750-1776(2.23) 1896-1921(1.18) 3323-3348(0.58)                                                                                                            |
| gnl UG Hs#S3219840  | 4.11 | 2 1325-1350(4.11) 1803-1828(0.50)                                                                                                                                                          |
| gnl UG Hs#S4807962  | 1.07 | 2 564-589(0.13) 1144-1172(1.07)                                                                                                                                                            |
| gnl UG Hs#S1731053  | 1.4  | 1 516-542(1.40)                                                                                                                                                                            |
| gnl UG Hs#S1731769  | 5.97 | 8 167-194(1.33) 210-235(1.48) 652-678(3.14) 1542-1568(0.24) 1750-1775(1.87) 2042-2067(5.97) 2079-2109(0.62) 2728-2754(2.25)                                                                |
| gnl UG Hs#S4546020  | 0.65 | 3 461-490(0.11) 605-630(0.58) 864-889(0.65)                                                                                                                                                |
| gnl UG Hs#S2139100  | 0.79 | 1 797-822(0.79)                                                                                                                                                                            |
| gnl UG Hs#S3355531  | 1.04 | 1 539-565(1.04)                                                                                                                                                                            |
| gnl UG Hs#S1731653  | 2.07 | 15 621-647(1.26) 2163-2188(0.26) 3633-3658(0.89) 4344-4370(0.98) 4630-4655(0.72) 5514-5539(0.19) 5793-5818(0.36) 6400-6425(1.11) 6993-7019(1.17) 7171-7197(0.49) 7914-7940(0.50) 7996-8024 |
| gnl UG Hs#S3220142  | 2.62 | 1 544-569(2.62)                                                                                                                                                                            |
| gnl UG Hs#S1728052  | 1.52 | 4 78-106(0.16) 410-435(0.57) 972-998(1.17) 1003-1027(1.52)                                                                                                                                 |
| gnl UG Hs#S2139210  | 2.46 | 1 1149-1176(2.46)                                                                                                                                                                          |
| gnl UG Hs#S4435442  | 1.5  | 2 1719-1744(0.80) 1774-1800(1.50)                                                                                                                                                          |
| gnl UG Hs#S1728485  | 0.58 | 1 1862-1887(0.58)                                                                                                                                                                          |
| gnl UG Hs#S4621490  | 4.08 | 1 2346-2372(4.08)                                                                                                                                                                          |
| gnl UG Hs#S2139842  | 1.34 | 3 573-598(0.98) 1107-1132(0.30) 1551-1576(1.34)                                                                                                                                            |
| gnl UG Hs#S3814627  | 0.72 | 1 447-472(0.72)                                                                                                                                                                            |
| gnl UG Hs#S2293717  | 3.14 | 1 871-896(3.14)                                                                                                                                                                            |
| gnl UG Hs#S4615224  | 0.4  | 1 1543-1568(0.40)                                                                                                                                                                          |
| gnl UG Hs#S3542627  | 5.25 | 6 565-590(0.04) 1579-1605(5.25) 2315-2340(1.53) 2357-2382(1.47) 2521-2546(0.50) 2571-2597(0.76)                                                                                            |
| gnl UG Hs#S1728691  | 2.63 | 3 137-162(2.63) 606-634(0.18) 788-813(0.21)                                                                                                                                                |
| gnl UG Hs#S2293758  | 1.9  | 2 545-570(1.90) 672-698(0.68)                                                                                                                                                              |
| gnl UG Hs#S3219654  | 1.78 | 1 543-568(1.78)                                                                                                                                                                            |
| gnl UG Hs#S1730712  | 1.81 | 3 111-136(0.72) 754-782(1.81) 875-900(0.08)                                                                                                                                                |
| gnl UG Hs#S3438942  | 1.2  | 1 776-801(1.20)                                                                                                                                                                            |
| gnl UG Hs#S1824416  | 1.57 | 1 101-127(1.57)                                                                                                                                                                            |
| gnl UG Hs#S1726868  | 1.36 | 1 434-460(1.36)                                                                                                                                                                            |
| gnl UG Hs#S2140377  | 0.5  | 1 1-27(0.50)                                                                                                                                                                               |
| gnl UG Hs#S1731747  | 0.07 | 1 339-364(0.07)                                                                                                                                                                            |

|                     |      |   |                                                                                                                                               |
|---------------------|------|---|-----------------------------------------------------------------------------------------------------------------------------------------------|
| gnl UG Hs#S2293696  | 3.04 | 3 | 287-312(3.04) 448-472(0.08) 526-551(1.72)                                                                                                     |
| gnl UG Hs#S2139054  | 1.42 | 3 | 634-657(0.34) 2557-2585(1.42) 2595-2623(0.97)                                                                                                 |
| gnl UG Hs#S1729262  | 3.47 | 2 | 483-508(3.47) 690-715(1.40)                                                                                                                   |
| gnl UG Hs#S2293237  | 1.63 | 1 | 328-353(1.63)                                                                                                                                 |
| gnl UG Hs#S2294285  | 0.87 | 1 | 75-100(0.87)                                                                                                                                  |
| gnl UG Hs#S3547235  | 2.89 | 2 | 811-837(2.89) 901-925(0.72)                                                                                                                   |
| gnl UG Hs#S1726246  | 0.17 | 1 | 240-265(0.17)                                                                                                                                 |
| gnl UG Hs#S15730180 | 0.5  | 1 | 293-319(0.50)                                                                                                                                 |
| gnl UG Hs#S7112783  | 2.98 | 8 | 109-134(1.40) 167-192(1.40) 227-252(2.98) 197-222(0.40) 1012-1038(0.08) 1265-1290(1.16) 1598-1623(0.47) 1749-1774(1.63)                       |
| gnl UG Hs#S2139542  | 3.04 | 4 | 557-582(0.50) 794-822(0.01) 1653-1678(1.04) 1833-1858(3.04)                                                                                   |
| gnl UG Hs#S4623571  | 0.12 | 1 | 372-396(0.12)                                                                                                                                 |
| gnl UG Hs#S1731356  | 5.53 | 6 | 209-234(5.53) 283-311(1.80) 368-396(0.90) 831-856(0.13) 1467-1492(2.40) 1515-1540(0.23)                                                       |
| gnl UG Hs#S14273283 | 1.1  | 2 | 112-137(1.10) 680-705(0.33)                                                                                                                   |
| gnl UG Hs#S1727647  | 1.62 | 1 | 1363-1389(1.62)                                                                                                                               |
| gnl UG Hs#S4285057  | 0.62 | 1 | 22-45(0.62)                                                                                                                                   |
| gnl UG Hs#S3438729  | 0.16 | 1 | 839-867(0.16)                                                                                                                                 |
| gnl UG Hs#S1727048  | 1.65 | 3 | 292-318(0.08) 958-983(0.79) 1048-1073(1.65)                                                                                                   |
| gnl UG Hs#S1091045  | 0.33 | 2 | 367-392(0.33) 548-573(0.23)                                                                                                                   |
| gnl UG Hs#S7110910  | 0.07 | 1 | 669-694(0.07)                                                                                                                                 |
| gnl UG Hs#S1569314  | 0.75 | 1 | 1693-1718(0.75)                                                                                                                               |
| gnl UG Hs#S1727908  | 1.02 | 1 | 971-1002(1.02)                                                                                                                                |
| gnl UG Hs#S3988449  | 0.54 | 1 | 192-218(0.54)                                                                                                                                 |
| gnl UG Hs#S7112475  | 0.57 | 3 | 501-524(0.20) 1684-1709(0.04) 3017-3043(0.57)                                                                                                 |
| gnl UG Hs#S2294396  | 1.3  | 1 | 536-562(1.30)                                                                                                                                 |
| gnl UG Hs#S3219373  | 0.46 | 1 | 1168-1193(0.46)                                                                                                                               |
| gnl UG Hs#S1727430  | 2.98 | 4 | 642-668(2.65) 910-936(2.08) 1157-1181(0.29) 1582-1610(2.98)                                                                                   |
| gnl UG Hs#S3219228  | 1.4  | 1 | 197-222(1.40)                                                                                                                                 |
| gnl UG Hs#S15644809 | 3.39 | 8 | 339-364(1.11) 403-429(0.21) 678-703(0.68) 968-993(2.50) 1364-1389(3.39) 1460-1486(0.27) 1519-1544(2.04) 1664-1689(1.08)                       |
| gnl UG Hs#S2293954  | 0.63 | 1 | 151-176(0.63)                                                                                                                                 |
| gnl UG Hs#S1728495  | 1.89 | 2 | 120-145(1.89) 148-172(0.27)                                                                                                                   |
| gnl UG Hs#S2293874  | 1.23 | 2 | 198-224(0.49) 303-328(1.23)                                                                                                                   |
| gnl UG Hs#S4823170  | 0.14 | 1 | 59-84(0.14)                                                                                                                                   |
| gnl UG Hs#S15116095 | 1.98 | 1 | 842-868(1.98)                                                                                                                                 |
| gnl UG Hs#S1730838  | 1.17 | 3 | 812-837(1.17) 1241-1266(0.20) 2592-2616(0.62)                                                                                                 |
| gnl UG Hs#S4807706  | 0.56 | 1 | 1118-1141(0.56)                                                                                                                               |
| gnl UG Hs#S15637088 | 2.25 | 1 | 240-265(2.25)                                                                                                                                 |
| gnl UG Hs#S3989203  | 1.17 | 1 | 660-685(1.17)                                                                                                                                 |
| gnl UG Hs#S3438940  | 0.58 | 1 | 1165-1190(0.58)                                                                                                                               |
| gnl UG Hs#S15644256 | 2.67 | 3 | 419-444(1.17) 1993-2018(0.03) 2143-2168(2.67)                                                                                                 |
| gnl UG Hs#S4621593  | 4.55 | 2 | 1061-1089(1.55) 1854-1879(4.55)                                                                                                               |
| gnl UG Hs#S15632964 | 2.7  | 3 | 230-258(0.82) 731-756(0.30) 804-829(2.70)                                                                                                     |
| gnl UG Hs#S1969028  | 4.08 | 1 | 1382-1408(4.08)                                                                                                                               |
| gnl UG Hs#S3940077  | 0.68 | 1 | 136-162(0.68)                                                                                                                                 |
| gnl UG Hs#S7111878  | 2.39 | 2 | 442-467(2.39) 1338-1363(0.08)                                                                                                                 |
| gnl UG Hs#S4553499  | 5.95 | 9 | 730-756(3.17) 1369-1394(0.53) 1736-1761(5.95) 1983-2008(0.91) 2556-2582(0.11) 2674-2698(0.18) 3426-3451(0.72) 4158-4183(1.46) 4357-4383(1.69) |
| gnl UG Hs#S3438578  | 5.16 | 2 | 1156-1182(1.71) 1279-1304(5.16)                                                                                                               |
| gnl UG Hs#S3438992  | 0.9  | 1 | 1288-1315(0.90)                                                                                                                               |
| gnl UG Hs#S14812844 | 1.98 | 3 | 1632-1657(1.46) 1666-1692(1.91) 1694-1719(1.98)                                                                                               |
| gnl UG Hs#S10832218 | 3.2  | 3 | 278-305(3.20) 453-478(2.67) 806-831(2.35)                                                                                                     |
| gnl UG Hs#S3437961  | 7.31 | 1 | 195-220(7.31)                                                                                                                                 |
| gnl UG Hs#S4631317  | 0.65 | 1 | 114-140(0.65)                                                                                                                                 |
| gnl UG Hs#S3603828  | 0.43 | 2 | 659-684(0.40) 726-752(0.43)                                                                                                                   |
| gnl UG Hs#S3220213  | 0.75 | 1 | 1026-1051(0.75)                                                                                                                               |
| gnl UG Hs#S1569349  | 4.2  | 4 | 654-679(2.70) 1121-1146(4.20) 1207-1232(0.16) 2976-3001(0.20)                                                                                 |

|                     |      |   |                                                                                                         |
|---------------------|------|---|---------------------------------------------------------------------------------------------------------|
| gnl UG Hs#S3438669  | 1.39 | 3 | 1775-1800(1.39) 3107-3135(0.29) 3206-3231(0.14)                                                         |
| gnl UG Hs#S3547090  | 4.08 | 3 | 198-222(0.77) 671-699(0.65) 739-764(4.08)                                                               |
| gnl UG Hs#S4284743  | 1.4  | 1 | 1548-1576(1.40)                                                                                         |
| gnl UG Hs#S5517615  | 0.55 | 2 | 677-704(0.55) 1021-1046(0.40)                                                                           |
| gnl UG Hs#S4621152  | 4.4  | 4 | 124-149(2.21) 343-368(2.30) 526-552(4.40) 555-580(4.04)                                                 |
| gnl UG Hs#S3438540  | 2.14 | 1 | 771-797(2.14)                                                                                           |
| gnl UG Hs#S5517247  | 2.24 | 1 | 559-584(2.24)                                                                                           |
| gnl UG Hs#S4816235  | 0.81 | 1 | 393-418(0.81)                                                                                           |
| gnl UG Hs#S4620992  | 3.34 | 1 | 721-748(3.34)                                                                                           |
| gnl UG Hs#S15632131 | 0.4  | 3 | 820-845(0.10) 922-950(0.14) 1144-1170(0.40)                                                             |
| gnl UG Hs#S4044924  | 0.98 | 2 | 1742-1767(0.98) 3363-3388(0.89)                                                                         |
| gnl UG Hs#S5978805  | 2.36 | 2 | 418-444(2.36) 524-550(0.94)                                                                             |
| gnl UG Hs#S3219452  | 1.53 | 7 | 6-32(0.12) 344-369(0.76) 981-1007(0.04) 1152-1179(1.53) 1247-1272(0.39) 1389-1414(0.98) 1513-1538(0.62) |
| gnl UG Hs#S1727662  | 0.66 | 2 | 1483-1509(0.01) 1919-1945(0.66)                                                                         |
| gnl UG Hs#S4818129  | 0.85 | 2 | 902-927(0.11) 2578-2606(0.85)                                                                           |
| gnl UG Hs#S2139197  | 5.14 | 1 | 127-152(5.14)                                                                                           |
| gnl UG Hs#S3333480  | 2.67 | 1 | 301-326(2.67)                                                                                           |
| gnl UG Hs#S2138687  | 2.1  | 3 | 215-241(1.14) 306-332(2.10) 448-474(0.01)                                                               |
| gnl UG Hs#S3219367  | 0.67 | 2 | 186-212(0.27) 237-263(0.67)                                                                             |
| gnl UG Hs#S4822641  | 0.74 | 2 | 128-154(0.69) 886-911(0.74)                                                                             |
| gnl UG Hs#S11154083 | 0.52 | 1 | 456-481(0.52)                                                                                           |
| gnl UG Hs#S3940065  | 0.82 | 2 | 252-277(0.82) 810-835(0.28)                                                                             |
| gnl UG Hs#S3619270  | 1.72 | 1 | 188-213(1.72)                                                                                           |
| gnl UG Hs#S3219924  | 0.09 | 1 | 2671-2699(0.09)                                                                                         |
| gnl UG Hs#S4830935  | 0.16 | 1 | 1218-1246(0.16)                                                                                         |
| gnl UG Hs#S3219878  | 2.98 | 2 | 743-769(0.40) 922-950(2.98)                                                                             |
| gnl UG Hs#S2138962  | 1.76 | 3 | 16-39(0.56) 512-537(0.33) 633-659(1.76)                                                                 |
| gnl UG Hs#S2140165  | 1.75 | 1 | 431-457(1.75)                                                                                           |
| gnl UG Hs#S1732052  | 2.56 | 1 | 1602-1628(2.56)                                                                                         |
| gnl UG Hs#S1729827  | 1.08 | 1 | 496-524(1.08)                                                                                           |
| gnl UG Hs#S1731990  | 0.59 | 1 | 891-916(0.59)                                                                                           |
| gnl UG Hs#S1969131  | 3.21 | 5 | 1056-1083(0.98) 1320-1346(3.21) 1593-1621(0.66) 2307-2332(1.30) 2575-2600(3.15)                         |
| gnl UG Hs#S2139584  | 1.32 | 1 | 585-612(1.32)                                                                                           |
| gnl UG Hs#S2293570  | 0.82 | 1 | 10-35(0.82)                                                                                             |
| gnl UG Hs#S4284985  | 1.15 | 1 | 192-217(1.15)                                                                                           |
| gnl UG Hs#S3972987  | 0.59 | 1 | 2586-2612(0.59)                                                                                         |
| gnl UG Hs#S3619638  | 0.81 | 1 | 188-213(0.81)                                                                                           |
| gnl UG Hs#S4810741  | 3.34 | 5 | 133-158(0.72) 201-226(0.97) 363-388(0.88) 652-677(3.34) 969-994(0.88)                                   |
| gnl UG Hs#S2293196  | 2.4  | 2 | 481-507(2.40) 517-545(2.07)                                                                             |
| gnl UG Hs#S2139077  | 3.26 | 1 | 544-569(3.26)                                                                                           |
| gnl UG Hs#S7110737  | 4.62 | 4 | 748-776(4.62) 1341-1366(1.04) 1572-1597(1.89) 2858-2883(2.57)                                           |
| gnl UG Hs#S4823133  | 3.23 | 3 | 171-195(0.04) 1136-1161(2.40) 2613-2641(3.23)                                                           |
| gnl UG Hs#S4809276  | 1.86 | 2 | 800-826(1.86) 3050-3075(0.44)                                                                           |
| gnl UG Hs#S3438386  | 2.04 | 2 | 76-105(2.04) 890-915(0.98)                                                                              |
| gnl UG Hs#S2293946  | 1.26 | 2 | 1748-1776(1.26) 1790-1816(0.46)                                                                         |
| gnl UG Hs#S4392164  | 1.5  | 3 | 351-379(0.40) 508-533(0.94) 685-711(1.50)                                                               |
| gnl UG Hs#S4046143  | 2.89 | 1 | 1587-1612(2.89)                                                                                         |
| gnl UG Hs#S1824474  | 1.65 | 6 | 166-192(0.27) 612-640(0.74) 770-798(1.40) 1266-1294(0.98) 1412-1437(0.10) 1908-1933(1.65)               |
| gnl UG Hs#S2140613  | 0.08 | 1 | 31-57(0.08)                                                                                             |
| gnl UG Hs#S2294427  | 0.21 | 1 | 1-26(0.21)                                                                                              |
| gnl UG Hs#S3991053  | 0.11 | 1 | 198-223(0.11)                                                                                           |
| gnl UG Hs#S1730644  | 2.4  | 2 | 46-74(2.40) 78-103(1.94)                                                                                |
| gnl UG Hs#S2293263  | 0.13 | 1 | 313-338(0.13)                                                                                           |
| gnl UG Hs#S2139562  | 3.76 | 4 | 537-562(0.30) 573-599(0.17) 696-722(3.76) 1320-1345(1.08)                                               |



|                     |      |   |                                                                                                                             |
|---------------------|------|---|-----------------------------------------------------------------------------------------------------------------------------|
| gnl UG Hs#S5978655  | 0.86 | 1 | 114-140(0.86)                                                                                                               |
| gnl UG Hs#S6693097  | 0.66 | 2 | 2222-2250(0.13) 3209-3235(0.66)                                                                                             |
| gnl UG Hs#S2293182  | 2.55 | 3 | 124-152(0.30) 495-522(2.55) 1627-1652(0.40)                                                                                 |
| gnl UG Hs#S3940905  | 1.26 | 3 | 41-67(0.81) 135-161(0.69) 602-627(1.26)                                                                                     |
| gnl UG Hs#S1726318  | 4.5  | 7 | 292-318(4.50) 768-794(0.21) 1305-1330(0.47) 1351-1376(2.47) 2785-2812(0.46) 3120-3147(0.97) 3275-3300(0.01)                 |
| gnl UG Hs#S10832571 | 2    | 1 | 215-240(2.00)                                                                                                               |
| gnl UG Hs#S1824576  | 1.11 | 2 | 32-55(1.11) 114-140(0.33)                                                                                                   |
| gnl UG Hs#S3438587  | 1.75 | 1 | 864-890(1.75)                                                                                                               |
| gnl UG Hs#S15644797 | 0.23 | 1 | 638-664(0.23)                                                                                                               |
| gnl UG Hs#S4807880  | 1.11 | 1 | 743-768(1.11)                                                                                                               |
| gnl UG Hs#S7111269  | 2.97 | 1 | 1546-1571(2.97)                                                                                                             |
| gnl UG Hs#S1727846  | 1.16 | 1 | 1045-1070(1.16)                                                                                                             |
| gnl UG Hs#S5860352  | 0.17 | 1 | 1057-1083(0.17)                                                                                                             |
| gnl UG Hs#S4807184  | 0.13 | 1 | 682-707(0.13)                                                                                                               |
| gnl UG Hs#S10817660 | 4.62 | 7 | 272-298(0.84) 375-403(4.62) 454-480(0.89) 562-586(0.68) 1703-1729(0.33) 1939-1964(0.53) 2162-2187(3.03)                     |
| gnl UG Hs#S1731342  | 0.08 | 1 | 167-191(0.08)                                                                                                               |
| gnl UG Hs#S1727801  | 5.56 | 1 | 287-312(5.56)                                                                                                               |
| gnl UG Hs#S1731826  | 1.91 | 1 | 1015-1040(1.91)                                                                                                             |
| gnl UG Hs#S5931378  | 2.07 | 7 | 1063-1087(0.19) 1214-1240(0.68) 1351-1376(0.79) 1387-1413(0.34) 1840-1866(1.21) 2862-2887(2.07) 3270-3297(1.76)             |
| gnl UG Hs#S4807875  | 3.67 | 1 | 1909-1934(3.67)                                                                                                             |
| gnl UG Hs#S3438938  | 0.95 | 1 | 1347-1371(0.95)                                                                                                             |
| gnl UG Hs#S5978838  | 0.17 | 1 | 791-816(0.17)                                                                                                               |
| gnl UG Hs#S1731228  | 4.65 | 3 | 105-130(2.50) 172-198(4.65) 891-919(1.98)                                                                                   |
| gnl UG Hs#S2139149  | 3.65 | 3 | 1128-1153(3.65) 1458-1483(2.50) 1808-1834(1.33)                                                                             |
| gnl UG Hs#S4814992  | 0.1  | 1 | 2576-2602(0.10)                                                                                                             |
| gnl UG Hs#S3618500  | 4.72 | 8 | 203-231(0.23) 663-693(1.15) 1654-1679(4.72) 1815-1840(0.17) 2082-2107(1.94) 2582-2607(0.29) 2858-2884(1.73) 2904-2931(1.03) |
| gnl UG Hs#S1731898  | 3.4  | 8 | 97-122(2.23) 289-314(3.40) 489-514(0.48) 535-560(2.17) 1734-1759(0.36) 2773-2798(0.30) 2831-2857(0.47) 2922-2948(1.84)      |
| gnl UG Hs#S7112054  | 0.22 | 2 | 764-789(0.04) 952-978(0.22)                                                                                                 |
| gnl UG Hs#S2293684  | 0.59 | 1 | 1959-1984(0.59)                                                                                                             |
| gnl UG Hs#S3219096  | 3.86 | 1 | 395-421(3.86)                                                                                                               |
| gnl UG Hs#S1730176  | 3.88 | 2 | 221-249(3.88) 272-297(1.08)                                                                                                 |
| gnl UG Hs#S7110615  | 0.46 | 1 | 2810-2835(0.46)                                                                                                             |
| gnl UG Hs#S1730735  | 0.85 | 1 | 202-227(0.85)                                                                                                               |
| gnl UG Hs#S1728362  | 2.82 | 3 | 234-261(1.43) 267-292(2.82) 498-523(0.29)                                                                                   |
| gnl UG Hs#S3220146  | 1.11 | 2 | 296-322(0.75) 389-414(1.11)                                                                                                 |
| gnl UG Hs#S5517546  | 3.05 | 1 | 1383-1410(3.05)                                                                                                             |
| gnl UG Hs#S1730991  | 0.59 | 2 | 206-231(0.46) 802-828(0.59)                                                                                                 |
| gnl UG Hs#S3619205  | 2.89 | 1 | 607-631(2.89)                                                                                                               |
| gnl UG Hs#S1728873  | 0.89 | 1 | 192-218(0.89)                                                                                                               |
| gnl UG Hs#S1726931  | 5.08 | 3 | 38-63(0.40) 320-345(5.08) 600-625(0.07)                                                                                     |
| gnl UG Hs#S4819948  | 2.3  | 2 | 307-333(2.30) 389-418(0.55)                                                                                                 |
| gnl UG Hs#S1730372  | 3.95 | 2 | 129-154(3.95) 342-370(0.40)                                                                                                 |
| gnl UG Hs#S1729103  | 1.91 | 1 | 626-651(1.91)                                                                                                               |
| gnl UG Hs#S2293450  | 2.5  | 1 | 203-228(2.50)                                                                                                               |
| gnl UG Hs#S7111099  | 2.08 | 4 | 63-89(2.08) 1259-1287(0.65) 1583-1610(1.66) 1662-1687(1.87)                                                                 |
| gnl UG Hs#S4808387  | 0.42 | 5 | 245-270(0.13) 440-466(0.42) 524-552(0.40) 853-878(0.39) 956-981(0.23)                                                       |
| gnl UG Hs#S2138977  | 1.4  | 1 | 592-617(1.40)                                                                                                               |
| gnl UG Hs#S1729000  | 0.6  | 1 | 280-306(0.60)                                                                                                               |
| gnl UG Hs#S3219783  | 1.5  | 1 | 675-701(1.50)                                                                                                               |
| gnl UG Hs#S1727517  | 1.76 | 1 | 33-58(1.76)                                                                                                                 |
| gnl UG Hs#S4827098  | 1.83 | 2 | 583-609(0.56) 956-982(1.83)                                                                                                 |
| gnl UG Hs#S15730162 | 1.07 | 3 | 2346-2371(0.58) 2409-2435(0.54) 2590-2618(1.07)                                                                             |
| gnl UG Hs#S2293369  | 3.13 | 3 | 112-137(3.13) 158-183(0.53) 340-366(0.69)                                                                                   |
| gnl UG Hs#S7111863  | 3.2  | 1 | 528-554(3.20)                                                                                                               |

|                     |      |    |                 |                                                                                                                                               |
|---------------------|------|----|-----------------|-----------------------------------------------------------------------------------------------------------------------------------------------|
| gnl UG Hs#S1730877  | 0.79 | 2  | 900-926(0.50)   | 1168-1194(0.79)                                                                                                                               |
| gnl UG Hs#S5931233  | 0.52 | 1  | 88-116(0.52)    |                                                                                                                                               |
| gnl UG Hs#S3973121  | 4.5  | 10 | 395-420(1.13)   | 706-731(3.01) 1340-1368(2.25) 1381-1404(4.50) 1865-1890(0.14) 1983-2008(1.30) 2375-2404(2.26) 2458-2483(0.30) 2545-2571(3.88) 2572-2597(1.19) |
| gnl UG Hs#S4283823  | 0.55 | 1  | 471-495(0.55)   |                                                                                                                                               |
| gnl UG Hs#S11046590 | 0.04 | 1  | 6-32(0.04)      |                                                                                                                                               |
| gnl UG Hs#S3602911  | 1.6  | 2  | 559-585(1.60)   | 780-806(1.01)                                                                                                                                 |
| gnl UG Hs#S4807900  | 1.66 | 2  | 921-946(1.66)   | 958-984(0.19)                                                                                                                                 |
| gnl UG Hs#S5860323  | 3.89 | 3  | 1744-1769(3.89) | 1970-1996(1.28) 2004-2028(2.90)                                                                                                               |
| gnl UG Hs#S14802313 | 2.65 | 1  | 40-65(2.65)     |                                                                                                                                               |
| gnl UG Hs#S7110639  | 0.91 | 1  | 1168-1193(0.91) |                                                                                                                                               |
| gnl UG Hs#S5931221  | 3.4  | 2  | 417-443(0.62)   | 874-899(3.40)                                                                                                                                 |
| gnl UG Hs#S3973038  | 0.58 | 2  | 241-266(0.58)   | 415-441(0.30)                                                                                                                                 |
| gnl UG Hs#S3217941  | 0.62 | 1  | 940-968(0.62)   |                                                                                                                                               |
| gnl UG Hs#S2293660  | 0.45 | 2  | 233-263(0.43)   | 661-689(0.45)                                                                                                                                 |
| gnl UG Hs#S4823569  | 0.93 | 2  | 475-501(0.45)   | 881-907(0.93)                                                                                                                                 |
| gnl UG Hs#S3439123  | 1.52 | 2  | 276-304(1.52)   | 671-697(0.30)                                                                                                                                 |
| gnl UG Hs#S1727796  | 2.82 | 6  | 430-457(2.52)   | 465-490(0.26) 1317-1342(2.30) 1651-1677(0.04) 1762-1788(2.82) 1805-1831(0.76)                                                                 |
| gnl UG Hs#S2293812  | 0.79 | 1  | 160-185(0.79)   |                                                                                                                                               |
| gnl UG Hs#S1727971  | 0.14 | 1  | 515-540(0.14)   |                                                                                                                                               |
| gnl UG Hs#S2139274  | 2.84 | 2  | 27-52(2.84)     | 227-253(1.33)                                                                                                                                 |
| gnl UG Hs#S1728015  | 2.57 | 7  | 1561-1586(2.57) | 1656-1681(2.04) 1798-1823(0.18) 2298-2323(0.75) 3226-3251(0.72) 3292-3317(0.50) 3355-3381(2.30)                                               |
| gnl UG Hs#S11046538 | 8.59 | 3  | 96-122(4.62)    | 146-171(1.22) 518-543(8.59)                                                                                                                   |
| gnl UG Hs#S4823623  | 3.4  | 3  | 588-613(0.30)   | 1074-1099(3.40) 1290-1315(3.30)                                                                                                               |
| gnl UG Hs#S4046183  | 0.24 | 1  | 511-536(0.24)   |                                                                                                                                               |
| gnl UG Hs#S3905493  | 1.72 | 4  | 46-75(0.33)     | 168-193(1.62) 1169-1194(0.32) 1242-1267(1.72)                                                                                                 |
| gnl UG Hs#S1729518  | 2.27 | 2  | 755-780(2.27)   | 1738-1763(0.14)                                                                                                                               |
| gnl UG Hs#S1729295  | 1.83 | 3  | 68-93(0.72)     | 231-256(0.20) 407-432(1.83)                                                                                                                   |
| gnl UG Hs#S2138767  | 2.17 | 4  | 118-141(2.17)   | 152-178(0.17) 2122-2152(0.67) 2360-2385(1.88)                                                                                                 |
| gnl UG Hs#S4827992  | 8.43 | 3  | 507-532(1.07)   | 610-635(8.43) 1131-1159(4.20)                                                                                                                 |
| gnl UG Hs#S11046653 | 1.17 | 8  | 268-293(0.62)   | 586-611(1.17) 1013-1041(0.55) 1100-1126(0.50) 1307-1335(1.03) 1834-1860(0.40) 2342-2368(0.12) 2493-2519(0.04)                                 |
| gnl UG Hs#S3543446  | 4.08 | 3  | 64-92(1.00)     | 195-221(4.08) 498-524(0.55)                                                                                                                   |
| gnl UG Hs#S4630850  | 4.21 | 7  | 20-45(1.07)     | 1121-1147(3.83) 1160-1188(0.04) 1209-1234(1.26) 1296-1324(0.45) 1926-1951(4.21) 2077-2104(0.74)                                               |
| gnl UG Hs#S4285221  | 4.79 | 3  | 132-157(4.79)   | 302-327(0.14) 541-566(0.04)                                                                                                                   |
| gnl UG Hs#S1726550  | 0.04 | 1  | 99-124(0.04)    |                                                                                                                                               |
| gnl UG Hs#S3439092  | 3.67 | 5  | 445-473(0.74)   | 524-552(3.67) 719-744(0.87) 981-1008(1.15) 1071-1096(1.53)                                                                                    |
| gnl UG Hs#S3438807  | 0.5  | 1  | 585-611(0.50)   |                                                                                                                                               |
| gnl UG Hs#S3973098  | 0.41 | 1  | 62-87(0.41)     |                                                                                                                                               |
| gnl UG Hs#S4825177  | 0.1  | 1  | 467-492(0.10)   |                                                                                                                                               |
| gnl UG Hs#S1727491  | 0.62 | 1  | 201-228(0.62)   |                                                                                                                                               |
| gnl UG Hs#S15642706 | 0.37 | 1  | 58-84(0.37)     |                                                                                                                                               |
| gnl UG Hs#S1727749  | 4.62 | 2  | 507-532(4.62)   | 559-585(0.68)                                                                                                                                 |
| gnl UG Hs#S2140084  | 1.57 | 2  | 70-95(1.57)     | 607-632(0.39)                                                                                                                                 |
| gnl UG Hs#S4285062  | 3.01 | 6  | 574-599(0.72)   | 629-654(0.50) 763-789(1.60) 1220-1248(0.20) 1568-1594(2.10) 1749-1775(3.01)                                                                   |
| gnl UG Hs#S1969010  | 6.11 | 6  | 208-233(4.11)   | 1211-1237(1.23) 1393-1418(0.94) 2195-2223(1.94) 2361-2387(0.52) 2414-2439(6.11)                                                               |
| gnl UG Hs#S4615050  | 1.53 | 1  | 1093-1118(1.53) |                                                                                                                                               |
| gnl UG Hs#S1730237  | 4.88 | 2  | 1621-1649(4.88) | 2119-2144(0.30)                                                                                                                               |
| gnl UG Hs#S7110014  | 0.3  | 1  | 1017-1042(0.30) |                                                                                                                                               |
| gnl UG Hs#S3601694  | 1.05 | 1  | 706-731(1.05)   |                                                                                                                                               |
| gnl UG Hs#S3603837  | 1.26 | 2  | 234-259(1.26)   | 994-1018(0.44)                                                                                                                                |
| gnl UG Hs#S3601666  | 1.56 | 1  | 712-736(1.56)   |                                                                                                                                               |
| gnl UG Hs#S3219162  | 1.91 | 3  | 226-251(0.39)   | 325-350(0.17) 362-387(1.91)                                                                                                                   |
| gnl UG Hs#S1728096  | 0.62 | 1  | 179-205(0.62)   |                                                                                                                                               |
| gnl UG Hs#S2139410  | 1.36 | 2  | 121-147(1.36)   | 349-374(0.84)                                                                                                                                 |
| gnl UG Hs#S1730173  | 1.71 | 1  | 405-432(1.71)   |                                                                                                                                               |

|                     |      |                                                                                                                                             |
|---------------------|------|---------------------------------------------------------------------------------------------------------------------------------------------|
| gnl UG Hs#S2139142  | 1.89 | 2 301-327(0.69) 489-514(1.89)                                                                                                               |
| gnl UG Hs#S3619142  | 0.98 | 1 962-987(0.98)                                                                                                                             |
| gnl UG Hs#S2139585  | 1.4  | 2 797-826(1.40) 1527-1552(0.40)                                                                                                             |
| gnl UG Hs#S15637203 | 2.72 | 9 291-316(1.50) 825-851(0.37) 963-990(0.49) 1363-1389(0.33) 1456-1484(0.17) 1518-1545(2.72) 1549-1575(0.23) 1818-1843(0.80) 2139-2164(2.01) |
| gnl UG Hs#S1729543  | 0.72 | 1 63-88(0.72)                                                                                                                               |
| gnl UG Hs#S4630848  | 2.3  | 1 613-640(2.30)                                                                                                                             |
| gnl UG Hs#S6091957  | 0.77 | 1 303-334(0.77)                                                                                                                             |
| gnl UG Hs#S5860364  | 1.13 | 2 730-755(1.13) 1072-1097(0.78)                                                                                                             |
| gnl UG Hs#S1726919  | 4.03 | 2 1323-1351(2.66) 1413-1438(4.03)                                                                                                           |
| gnl UG Hs#S3218949  | 0.98 | 5 210-235(0.33) 246-274(0.98) 409-434(0.53) 1357-1383(0.27) 2109-2135(0.34)                                                                 |
| gnl UG Hs#S7111157  | 0.82 | 2 313-338(0.53) 357-383(0.82)                                                                                                               |
| gnl UG Hs#S3219649  | 1.27 | 2 646-672(0.34) 1552-1578(1.27)                                                                                                             |
| gnl UG Hs#S1729985  | 2.58 | 4 618-643(2.58) 2653-2680(0.09) 2694-2720(0.33) 2749-2774(1.85)                                                                             |
| gnl UG Hs#S1726975  | 2.3  | 3 64-89(0.72) 763-789(2.30) 1078-1102(1.26)                                                                                                 |
| gnl UG Hs#S3990596  | 0.57 | 2 1483-1511(0.30) 1639-1665(0.57)                                                                                                           |
| gnl UG Hs#S1731328  | 2.4  | 3 191-216(1.13) 235-261(2.40) 754-779(0.79)                                                                                                 |
| gnl UG Hs#S5517080  | 0.91 | 1 112-137(0.91)                                                                                                                             |
| gnl UG Hs#S3603167  | 1.98 | 2 720-746(1.98) 885-911(0.27)                                                                                                               |
| gnl UG Hs#S2293786  | 0.29 | 1 575-600(0.29)                                                                                                                             |
| gnl UG Hs#S3439003  | 0.89 | 1 816-841(0.89)                                                                                                                             |
| gnl UG Hs#S4435310  | 0.69 | 1 541-567(0.69)                                                                                                                             |
| gnl UG Hs#S1729178  | 3.92 | 2 1464-1489(0.58) 2326-2352(3.92)                                                                                                           |
| gnl UG Hs#S1824487  | 0.13 | 1 231-256(0.13)                                                                                                                             |
| gnl UG Hs#S3601570  | 3.3  | 2 405-430(1.72) 479-505(3.30)                                                                                                               |
| gnl UG Hs#S3219715  | 4.92 | 5 84-110(0.86) 230-257(0.30) 515-540(0.30) 1281-1306(4.92) 1334-1360(1.40)                                                                  |
| gnl UG Hs#S1728173  | 2.26 | 3 116-141(1.75) 216-241(2.26) 882-907(0.49)                                                                                                 |
| gnl UG Hs#S4615552  | 1.03 | 2 322-350(1.03) 1556-1582(0.66)                                                                                                             |
| gnl UG Hs#S2138952  | 3.23 | 1 63-89(3.23)                                                                                                                               |
| gnl UG Hs#S3220185  | 5.69 | 3 408-436(5.69) 449-474(0.89) 497-520(1.15)                                                                                                 |
| gnl UG Hs#S4436273  | 0.95 | 1 907-934(0.95)                                                                                                                             |
| gnl UG Hs#S15636276 | 3.78 | 1 1746-1771(3.78)                                                                                                                           |
| gnl UG Hs#S4828135  | 1.9  | 4 194-222(1.23) 508-533(1.90) 761-786(0.81) 903-931(0.01)                                                                                   |
| gnl UG Hs#S2294621  | 0.79 | 1 2117-2142(0.79)                                                                                                                           |
| gnl UG Hs#S1730294  | 2.9  | 5 779-802(0.11) 863-889(0.62) 963-988(2.90) 1186-1211(0.17) 1264-1290(0.47)                                                                 |
| gnl UG Hs#S1730723  | 1.89 | 3 84-111(1.39) 507-532(1.89) 946-971(0.72)                                                                                                  |
| gnl UG Hs#S4824168  | 2.11 | 2 1109-1134(2.11) 1262-1287(1.14)                                                                                                           |
| gnl UG Hs#S4828525  | 0.27 | 1 112-138(0.27)                                                                                                                             |
| gnl UG Hs#S3218962  | 3.03 | 2 323-352(3.03) 421-449(1.11)                                                                                                               |
| gnl UG Hs#S4044525  | 1.3  | 1 318-343(1.30)                                                                                                                             |
| gnl UG Hs#S3601674  | 1.13 | 1 169-195(1.13)                                                                                                                             |
| gnl UG Hs#S2294539  | 4.56 | 8 1896-1921(2.72) 2052-2079(0.84) 2177-2202(2.36) 2560-2586(3.36) 2603-2628(0.17) 2649-2674(4.56) 3245-3270(2.30) 3898-3923(3.37)           |
| gnl UG Hs#S4631403  | 0.23 | 1 1581-1610(0.23)                                                                                                                           |
| gnl UG Hs#S4622746  | 0.49 | 1 1038-1064(0.49)                                                                                                                           |
| gnl UG Hs#S3438932  | 1.56 | 3 465-490(0.87) 782-808(0.76) 1079-1109(1.56)                                                                                               |
| gnl UG Hs#S3355557  | 1.99 | 2 161-185(1.99) 258-283(0.16)                                                                                                               |
| gnl UG Hs#S2139155  | 1.53 | 4 322-349(0.43) 872-897(1.08) 1052-1079(1.14) 1155-1180(1.53)                                                                               |
| gnl UG Hs#S2139280  | 0.46 | 1 290-315(0.46)                                                                                                                             |
| gnl UG Hs#S1729679  | 0.84 | 4 87-112(0.84) 546-570(0.10) 680-705(0.57) 930-955(0.76)                                                                                    |
| gnl UG Hs#S2293480  | 4.85 | 1 117-142(4.85)                                                                                                                             |
| gnl UG Hs#S7112781  | 0.84 | 1 300-325(0.84)                                                                                                                             |
| gnl UG Hs#S5495013  | 2.78 | 1 627-652(2.78)                                                                                                                             |
| gnl UG Hs#S7112750  | 1.94 | 3 108-133(0.79) 603-628(0.98) 2005-2030(1.94)                                                                                               |
| gnl UG Hs#S5978609  | 1.62 | 1 623-649(1.62)                                                                                                                             |
| gnl UG Hs#S3803671  | 4.94 | 4 21-46(4.94) 100-125(0.01) 425-450(3.59) 1370-1394(2.41)                                                                                   |

|                     |      |                                                                                                                                                                                              |
|---------------------|------|----------------------------------------------------------------------------------------------------------------------------------------------------------------------------------------------|
| gnl UG Hs#S1971591  | 2.3  | 1 153-178(2.30)                                                                                                                                                                              |
| gnl UG Hs#S3438804  | 2.4  | 5 713-738(2.40) 1347-1374(1.69) 2352-2377(0.92) 3108-3134(0.43) 3165-3190(1.39)                                                                                                              |
| gnl UG Hs#S1731595  | 5.82 | 2 16-44(0.14) 1461-1487(5.82)                                                                                                                                                                |
| gnl UG Hs#S2140415  | 1.58 | 4 178-203(0.65) 273-298(1.58) 421-447(0.91) 625-650(0.07)                                                                                                                                    |
| gnl UG Hs#S1731677  | 0.33 | 1 1160-1188(0.33)                                                                                                                                                                            |
| gnl UG Hs#S4807644  | 1.88 | 2 543-568(1.88) 1151-1176(0.24)                                                                                                                                                              |
| gnl UG Hs#S1727005  | 2.23 | 1 252-281(2.23)                                                                                                                                                                              |
| gnl UG Hs#S15638199 | 1.5  | 3 217-243(1.50) 1270-1295(0.40) 2274-2299(1.17)                                                                                                                                              |
| gnl UG Hs#S4285117  | 3.97 | 1 239-264(3.97)                                                                                                                                                                              |
| gnl UG Hs#S1729432  | 5.72 | 2 200-225(5.72) 285-310(1.85)                                                                                                                                                                |
| gnl UG Hs#S3219454  | 2.24 | 3 1000-1028(2.24) 1087-1112(0.72) 1166-1194(0.88)                                                                                                                                            |
| gnl UG Hs#S4545987  | 3.07 | 2 136-161(3.07) 168-192(0.23)                                                                                                                                                                |
| gnl UG Hs#S4821534  | 0.33 | 1 263-288(0.33)                                                                                                                                                                              |
| gnl UG Hs#S15115744 | 4.2  | 3 619-644(0.82) 730-755(4.20) 820-845(1.96)                                                                                                                                                  |
| gnl UG Hs#S1730754  | 0.67 | 1 1066-1092(0.67)                                                                                                                                                                            |
| gnl UG Hs#S2293303  | 4.43 | 1 1512-1537(4.43)                                                                                                                                                                            |
| gnl UG Hs#S2139705  | 0.2  | 1 391-420(0.20)                                                                                                                                                                              |
| gnl UG Hs#S4546274  | 0.88 | 1 177-202(0.88)                                                                                                                                                                              |
| gnl UG Hs#S4807822  | 1.91 | 3 194-220(0.43) 322-348(1.91) 655-680(0.65)                                                                                                                                                  |
| gnl UG Hs#S6664657  | 3.69 | 4 2318-2346(0.07) 2368-2396(3.69) 3270-3298(0.42) 3354-3380(0.34)                                                                                                                            |
| gnl UG Hs#S1971519  | 2.23 | 6 533-558(1.72) 710-738(2.08) 837-862(2.23) 1066-1092(0.20) 1457-1482(0.89) 1534-1559(0.24)                                                                                                  |
| gnl UG Hs#S1727407  | 0.75 | 1 221-246(0.75)                                                                                                                                                                              |
| gnl UG Hs#S4812446  | 3.4  | 2 249-276(3.40) 304-330(0.58)                                                                                                                                                                |
| gnl UG Hs#S7112784  | 4.55 | 7 1086-1112(2.56) 2114-2139(2.52) 2680-2706(2.43) 2714-2740(4.55) 3090-3113(0.15) 3254-3280(3.08) 3305-3330(0.01)                                                                            |
| gnl UG Hs#S1728810  | 1.62 | 4 70-96(0.04) 224-249(1.62) 250-275(0.08) 870-897(0.55)                                                                                                                                      |
| gnl UG Hs#S1726748  | 3.5  | 1 577-602(3.50)                                                                                                                                                                              |
| gnl UG Hs#S1728343  | 1.46 | 1 940-966(1.46)                                                                                                                                                                              |
| gnl UG Hs#S1244975  | 3.85 | 9 481-507(0.23) 531-556(0.55) 1049-1074(1.67) 2057-2085(1.88) 2637-2665(2.84) 3595-3621(0.43) 3634-3659(3.85) 5014-5040(2.46) 5072-5097(1.40)                                                |
| gnl UG Hs#S1972995  | 0.39 | 2 527-552(0.33) 1576-1601(0.39)                                                                                                                                                              |
| gnl UG Hs#S1729628  | 1.56 | 1 529-556(1.56)                                                                                                                                                                              |
| gnl UG Hs#S4813091  | 1.98 | 1 144-169(1.98)                                                                                                                                                                              |
| gnl UG Hs#S1728517  | 3.04 | 3 116-141(3.04) 284-309(0.91) 535-561(1.76)                                                                                                                                                  |
| gnl UG Hs#S1730226  | 0.2  | 1 371-396(0.20)                                                                                                                                                                              |
| gnl UG Hs#S4807860  | 5.74 | 13 53-78(0.14) 190-215(0.71) 587-612(1.58) 821-848(2.39) 958-983(0.50) 1051-1076(2.65) 1178-1203(0.14) 1448-1474(4.23) 1745-1770(0.29) 1851-1877(5.74) 1956-1982(0.82) 2007-2032(0.17) 2056- |
| gnl UG Hs#S4815817  | 0.57 | 2 548-573(0.57) 576-601(0.24)                                                                                                                                                                |
| gnl UG Hs#S10832526 | 1.3  | 2 3952-3977(1.30) 4275-4300(0.36)                                                                                                                                                            |
| gnl UG Hs#S1729810  | 2.3  | 1 1445-1470(2.30)                                                                                                                                                                            |
| gnl UG Hs#S1727800  | 2.27 | 3 830-858(2.27) 1217-1242(0.33) 3101-3124(0.97)                                                                                                                                              |
| gnl UG Hs#S2138936  | 0.3  | 1 610-636(0.30)                                                                                                                                                                              |
| gnl UG Hs#S3619669  | 1.45 | 4 138-165(1.01) 248-273(0.40) 902-928(1.45) 1055-1085(1.10)                                                                                                                                  |
| gnl UG Hs#S11154025 | 0.03 | 1 457-484(0.03)                                                                                                                                                                              |
| gnl UG Hs#S5978835  | 2.3  | 1 449-475(2.30)                                                                                                                                                                              |
| gnl UG Hs#S4631189  | 1.69 | 2 223-248(0.87) 346-374(1.69)                                                                                                                                                                |
| gnl UG Hs#S15641466 | 4.83 | 2 328-355(0.69) 488-514(4.83)                                                                                                                                                                |
| gnl UG Hs#S1728407  | 1.79 | 2 18-43(1.79) 236-261(1.18)                                                                                                                                                                  |
| gnl UG Hs#S3438923  | 3.13 | 2 779-804(3.13) 841-866(2.53)                                                                                                                                                                |
| gnl UG Hs#S14802398 | 4.82 | 1 867-893(4.82)                                                                                                                                                                              |
| gnl UG Hs#S1727217  | 1.19 | 1 637-662(1.19)                                                                                                                                                                              |
| gnl UG Hs#S4807861  | 2.25 | 1 792-816(2.25)                                                                                                                                                                              |
| gnl UG Hs#S1726899  | 2.59 | 6 306-331(0.16) 387-412(0.36) 1182-1210(2.59) 1357-1382(0.04) 1641-1669(1.40) 1958-1984(1.40)                                                                                                |
| gnl UG Hs#S1824516  | 4.11 | 1 435-458(4.11)                                                                                                                                                                              |
| gnl UG Hs#S4615975  | 1.62 | 4 84-108(1.58) 194-217(1.62) 776-801(0.08) 1372-1398(0.36)                                                                                                                                   |
| gnl UG Hs#S3601568  | 0.57 | 2 218-246(0.23) 1642-1667(0.57)                                                                                                                                                              |
| gnl UG Hs#S4553552  | 1.99 | 5 303-327(1.99) 359-383(0.42) 475-504(0.97) 1227-1253(0.72) 1283-1308(1.40)                                                                                                                  |

|                     |      |   |                                                                                           |
|---------------------|------|---|-------------------------------------------------------------------------------------------|
| gnl UG Hs#S3219261  | 0.48 | 1 | 119-144(0.48)                                                                             |
| gnl UG Hs#S4285343  | 4.43 | 3 | 189-215(4.43) 222-248(0.76) 395-423(1.51)                                                 |
| gnl UG Hs#S7111409  | 0.66 | 3 | 1629-1654(0.17) 1704-1729(0.66) 2161-2187(0.59)                                           |
| gnl UG Hs#S2329527  | 0.04 | 1 | 938-964(0.04)                                                                             |
| gnl UG Hs#S4618098  | 4.36 | 1 | 828-853(4.36)                                                                             |
| gnl UG Hs#S5931249  | 2.14 | 5 | 812-840(0.96) 903-928(1.13) 984-1010(1.23) 2231-2256(2.14) 2509-2537(1.71)                |
| gnl UG Hs#S2140646  | 1.82 | 1 | 466-491(1.82)                                                                             |
| gnl UG Hs#S14863734 | 2.82 | 3 | 112-137(0.14) 718-743(2.82) 1115-1140(0.58)                                               |
| gnl UG Hs#S1726422  | 2.39 | 2 | 144-169(2.17) 252-277(2.39)                                                               |
| gnl UG Hs#S1728666  | 0.46 | 2 | 204-229(0.46) 235-261(0.34)                                                               |
| gnl UG Hs#S1727788  | 1.32 | 4 | 85-114(0.71) 448-473(0.94) 697-722(1.20) 895-919(1.32)                                    |
| gnl UG Hs#S4828467  | 0.86 | 1 | 1026-1052(0.86)                                                                           |
| gnl UG Hs#S1731309  | 0.13 | 1 | 289-314(0.13)                                                                             |
| gnl UG Hs#S1730701  | 1.76 | 1 | 447-475(1.76)                                                                             |
| gnl UG Hs#S2140443  | 1.81 | 1 | 129-157(1.81)                                                                             |
| gnl UG Hs#S4553164  | 0.4  | 2 | 73-98(0.40) 175-200(0.01)                                                                 |
| gnl UG Hs#S1729554  | 1.97 | 4 | 2818-2844(1.57) 3178-3203(1.97) 3228-3253(0.94) 3793-3818(0.46)                           |
| gnl UG Hs#S1729832  | 0.49 | 1 | 332-358(0.49)                                                                             |
| gnl UG Hs#S1727557  | 0.72 | 1 | 458-483(0.72)                                                                             |
| gnl UG Hs#S1731897  | 3.79 | 1 | 576-601(3.79)                                                                             |
| gnl UG Hs#S2139829  | 1.98 | 2 | 366-394(0.88) 550-576(1.98)                                                               |
| gnl UG Hs#S3817877  | 0.1  | 1 | 245-271(0.10)                                                                             |
| gnl UG Hs#S3355580  | 0.58 | 1 | 700-724(0.58)                                                                             |
| gnl UG Hs#S3438703  | 0.2  | 1 | 390-415(0.20)                                                                             |
| gnl UG Hs#S1732014  | 0.65 | 3 | 183-210(0.14) 247-272(0.65) 447-472(0.30)                                                 |
| gnl UG Hs#S2139932  | 0.91 | 2 | 686-712(0.91) 918-943(0.59)                                                               |
| gnl UG Hs#S4807995  | 0.58 | 2 | 117-142(0.58) 350-376(0.27)                                                               |
| gnl UG Hs#S1727114  | 1.4  | 1 | 589-617(1.40)                                                                             |
| gnl UG Hs#S3219847  | 0.54 | 1 | 164-190(0.54)                                                                             |
| gnl UG Hs#S3814693  | 0.52 | 1 | 298-326(0.52)                                                                             |
| gnl UG Hs#S1732131  | 2.98 | 2 | 131-156(0.30) 481-509(2.98)                                                               |
| gnl UG Hs#S5860344  | 2.3  | 2 | 566-591(0.56) 1164-1189(2.30)                                                             |
| gnl UG Hs#S1731615  | 0.82 | 1 | 1384-1410(0.82)                                                                           |
| gnl UG Hs#S4621598  | 1.21 | 2 | 384-409(0.94) 1278-1301(1.21)                                                             |
| gnl UG Hs#S1726923  | 0.17 | 1 | 10-36(0.17)                                                                               |
| gnl UG Hs#S4810146  | 1.25 | 1 | 2086-2114(1.25)                                                                           |
| gnl UG Hs#S15638067 | 3.01 | 6 | 574-599(0.72) 629-654(0.50) 763-789(1.60) 1220-1248(0.20) 1568-1594(2.10) 1749-1775(3.01) |
| gnl UG Hs#S15631516 | 2.21 | 6 | 380-403(1.04) 577-602(1.40) 676-701(0.81) 710-736(2.17) 760-791(0.90) 821-846(2.21)       |
| gnl UG Hs#S3619659  | 2.56 | 4 | 350-378(2.56) 997-1022(2.30) 1118-1143(0.30) 1551-1577(0.60)                              |
| gnl UG Hs#S3219879  | 2.78 | 2 | 3-31(1.76) 110-135(2.78)                                                                  |
| gnl UG Hs#S3220207  | 3.21 | 3 | 122-148(1.08) 240-266(0.21) 2092-2117(3.21)                                               |
| gnl UG Hs#S2140060  | 1.4  | 3 | 2-27(0.84) 281-309(1.40) 565-590(0.94)                                                    |
| gnl UG Hs#S3619238  | 0.08 | 1 | 855-881(0.08)                                                                             |
| gnl UG Hs#S4435418  | 0.06 | 1 | 702-728(0.06)                                                                             |
| gnl UG Hs#S2138928  | 2.62 | 1 | 331-356(2.62)                                                                             |
| gnl UG Hs#S1731313  | 3.3  | 2 | 48-73(3.17) 120-145(3.30)                                                                 |
| gnl UG Hs#S3603156  | 2.2  | 1 | 38-63(2.20)                                                                               |
| gnl UG Hs#S15643217 | 5.14 | 1 | 188-213(5.14)                                                                             |
| gnl UG Hs#S4827230  | 2.56 | 2 | 236-261(0.89) 337-365(2.56)                                                               |
| gnl UG Hs#S1728050  | 1.88 | 4 | 48-73(1.88) 150-178(0.81) 373-401(0.21) 573-597(0.34)                                     |
| gnl UG Hs#S1732170  | 5.36 | 1 | 1675-1700(5.36)                                                                           |
| gnl UG Hs#S2294503  | 2.04 | 1 | 54-83(2.04)                                                                               |
| gnl UG Hs#S4807933  | 1.63 | 1 | 131-156(1.63)                                                                             |
| gnl UG Hs#S2139439  | 0.72 | 1 | 391-416(0.72)                                                                             |

|                     |      |                                                                                                                               |
|---------------------|------|-------------------------------------------------------------------------------------------------------------------------------|
| gnl UG Hs#S1730152  | 0.13 | 1 68-93(0.13)                                                                                                                 |
| gnl UG Hs#S3219551  | 1.88 | 1 502-530(1.88)                                                                                                               |
| gnl UG Hs#S2293784  | 1.43 | 1 207-233(1.43)                                                                                                               |
| gnl UG Hs#S4807710  | 2.07 | 4 859-887(0.47) 1044-1069(0.14) 1856-1881(2.07) 1898-1921(0.30)                                                               |
| gnl UG Hs#S2293711  | 1.98 | 1 416-441(1.98)                                                                                                               |
| gnl UG Hs#S5494987  | 0.58 | 1 2658-2684(0.58)                                                                                                             |
| gnl UG Hs#S2294088  | 1.57 | 2 349-375(0.17) 431-456(1.57)                                                                                                 |
| gnl UG Hs#S2294293  | 2.2  | 6 414-439(0.46) 853-881(1.07) 1142-1167(1.90) 1275-1301(0.04) 1493-1519(1.82) 1646-1671(2.20)                                 |
| gnl UG Hs#S3219040  | 3.92 | 3 425-450(0.94) 2416-2441(0.98) 2539-2565(3.92)                                                                               |
| gnl UG Hs#S2139499  | 3.14 | 6 136-161(3.14) 751-778(2.14) 854-879(1.94) 2547-2573(0.49) 2893-2919(0.11) 3483-3511(2.94)                                   |
| gnl UG Hs#S1824402  | 1.63 | 1 350-375(1.63)                                                                                                               |
| gnl UG Hs#S3439045  | 0.94 | 6 738-763(0.26) 1055-1081(0.30) 1288-1311(0.16) 1319-1342(0.72) 1371-1396(0.94) 1406-1431(0.34)                               |
| gnl UG Hs#S3438815  | 4.26 | 2 567-592(4.26) 1443-1466(0.62)                                                                                               |
| gnl UG Hs#S2140050  | 0.11 | 1 153-179(0.11)                                                                                                               |
| gnl UG Hs#S5978386  | 1.36 | 1 1283-1307(1.36)                                                                                                             |
| gnl UG Hs#S1731589  | 2.98 | 5 141-167(0.23) 204-229(0.08) 816-841(0.91) 931-956(2.98) 1315-1339(2.94)                                                     |
| gnl UG Hs#S3619679  | 1.3  | 2 287-312(1.30) 2461-2489(1.30)                                                                                               |
| gnl UG Hs#S4614521  | 0.57 | 1 1439-1465(0.57)                                                                                                             |
| gnl UG Hs#S6686653  | 2.21 | 1 1441-1467(2.21)                                                                                                             |
| gnl UG Hs#S4620586  | 1.5  | 1 1350-1376(1.50)                                                                                                             |
| gnl UG Hs#S4831095  | 1.17 | 1 213-238(1.17)                                                                                                               |
| gnl UG Hs#S15898577 | 2.83 | 2 2869-2898(2.83) 3012-3035(0.56)                                                                                             |
| gnl UG Hs#S1727053  | 1.79 | 1 213-238(1.79)                                                                                                               |
| gnl UG Hs#S7110181  | 0.88 | 1 1729-1756(0.88)                                                                                                             |
| gnl UG Hs#S1728268  | 0.75 | 1 1183-1208(0.75)                                                                                                             |
| gnl UG Hs#S4818609  | 3.3  | 5 168-193(2.47) 220-246(0.40) 881-906(0.76) 1226-1252(3.30) 1323-1349(0.17)                                                   |
| gnl UG Hs#S2138906  | 2.26 | 3 690-715(2.26) 740-765(1.14) 812-837(1.72)                                                                                   |
| gnl UG Hs#S1726828  | 3.72 | 5 416-442(3.18) 533-558(1.94) 771-796(3.72) 1360-1383(0.35) 1470-1495(1.14)                                                   |
| gnl UG Hs#S2139783  | 0.4  | 1 100-125(0.40)                                                                                                               |
| gnl UG Hs#S3438962  | 3.2  | 1 7-32(3.20)                                                                                                                  |
| gnl UG Hs#S4044694  | 0.15 | 1 1631-1658(0.15)                                                                                                             |
| gnl UG Hs#S3993592  | 0.43 | 1 268-295(0.43)                                                                                                               |
| gnl UG Hs#S2139805  | 4.08 | 2 89-115(2.67) 129-155(4.08)                                                                                                  |
| gnl UG Hs#S4396107  | 2.1  | 1 419-445(2.10)                                                                                                               |
| gnl UG Hs#S1729424  | 0.13 | 1 128-154(0.13)                                                                                                               |
| gnl UG Hs#S3355670  | 1.4  | 1 1830-1858(1.40)                                                                                                             |
| gnl UG Hs#S2294007  | 1.13 | 6 19-47(0.66) 276-305(1.04) 913-938(0.01) 1169-1196(1.01) 1393-1418(0.33) 1671-1696(1.13)                                     |
| gnl UG Hs#S1728420  | 0.89 | 2 488-513(0.11) 690-716(0.89)                                                                                                 |
| gnl UG Hs#S5495191  | 5.04 | 1 1193-1219(5.04)                                                                                                             |
| gnl UG Hs#S1729200  | 1.4  | 1 175-201(1.40)                                                                                                               |
| gnl UG Hs#S1731714  | 3.72 | 1 511-535(3.72)                                                                                                               |
| gnl UG Hs#S3601684  | 0.47 | 1 372-395(0.47)                                                                                                               |
| gnl UG Hs#S3814512  | 1.27 | 1 516-541(1.27)                                                                                                               |
| gnl UG Hs#S1730876  | 4.33 | 8 214-240(4.33) 478-503(2.57) 1545-1570(2.27) 1585-1610(1.07) 2484-2509(2.94) 2773-2798(1.08) 3057-3083(4.08) 3408-3432(0.66) |
| gnl UG Hs#S1730486  | 1.3  | 2 622-648(1.30) 1435-1461(0.60)                                                                                               |
| gnl UG Hs#S472703   | 4.62 | 3 1535-1560(1.08) 3220-3248(4.62) 3327-3352(4.04)                                                                             |
| gnl UG Hs#S1726782  | 0.9  | 3 536-561(0.04) 862-887(0.90) 1036-1061(0.26)                                                                                 |
| gnl UG Hs#S2139506  | 5.3  | 3 839-865(0.10) 1454-1479(5.30) 1545-1572(0.85)                                                                               |
| gnl UG Hs#S3219962  | 0.58 | 2 206-231(0.58) 1697-1722(0.40)                                                                                               |
| gnl UG Hs#S1727457  | 1.3  | 1 302-327(1.30)                                                                                                               |
| gnl UG Hs#S2293486  | 0.17 | 1 2302-2327(0.17)                                                                                                             |
| gnl UG Hs#S4820919  | 4.1  | 4 929-959(4.10) 1142-1167(1.05) 3222-3250(0.04) 3348-3376(0.71)                                                               |
| gnl UG Hs#S1729762  | 0.43 | 1 230-256(0.43)                                                                                                               |
| gnl UG Hs#S1729879  | 1.49 | 1 138-161(1.49)                                                                                                               |

|                     |      |                                                                                                                 |
|---------------------|------|-----------------------------------------------------------------------------------------------------------------|
| gnl UG Hs#S4807605  | 2.69 | 2 1000-1023(2.69) 1103-1128(1.72)                                                                               |
| gnl UG Hs#S1824526  | 5.89 | 3 504-529(2.82) 643-668(2.30) 748-774(5.89)                                                                     |
| gnl UG Hs#S4621617  | 1    | 7 421-445(1.00) 1412-1440(0.06) 1624-1649(0.91) 1939-1965(0.36) 2041-2067(0.82) 3085-3113(0.45) 3185-3210(0.40) |
| gnl UG Hs#S1727892  | 0.72 | 1 156-181(0.72)                                                                                                 |
| gnl UG Hs#S4435917  | 0.72 | 1 1051-1076(0.72)                                                                                               |
| gnl UG Hs#S10831713 | 1.98 | 2 665-689(1.37) 711-736(1.98)                                                                                   |
| gnl UG Hs#S3547073  | 0.72 | 1 343-368(0.72)                                                                                                 |
| gnl UG Hs#S4283926  | 3.26 | 4 124-149(1.61) 1253-1278(0.36) 2127-2152(3.26) 2355-2380(0.01)                                                 |
| gnl UG Hs#S6687032  | 3.2  | 7 10-35(0.89) 165-190(3.20) 405-430(1.98) 722-748(1.10) 824-849(2.50) 956-981(1.47) 1000-1025(0.65)             |
| gnl UG Hs#S2140137  | 0.72 | 2 726-751(0.72) 837-860(0.49)                                                                                   |
| gnl UG Hs#S4807630  | 1.3  | 1 55-80(1.30)                                                                                                   |
| gnl UG Hs#S2140065  | 1.63 | 1 31-55(1.63)                                                                                                   |
| gnl UG Hs#S2140692  | 0.63 | 4 521-546(0.18) 1433-1458(0.07) 1669-1695(0.30) 1838-1863(0.63)                                                 |
| gnl UG Hs#S1728930  | 2.89 | 3 765-790(2.89) 814-842(1.03) 1454-1479(1.53)                                                                   |
| gnl UG Hs#S1973087  | 3.05 | 3 649-676(0.07) 1388-1413(1.30) 1454-1480(3.05)                                                                 |
| gnl UG Hs#S15641542 | 0.98 | 1 11-36(0.98)                                                                                                   |
| gnl UG Hs#S3219870  | 1.5  | 1 67-92(1.50)                                                                                                   |
| gnl UG Hs#S4545965  | 1.4  | 1 177-202(1.40)                                                                                                 |
| gnl UG Hs#S4621177  | 1.56 | 4 476-503(1.56) 838-864(1.08) 997-1023(0.44) 1054-1077(0.56)                                                    |
| gnl UG Hs#S15637921 | 3.04 | 3 241-264(3.04) 379-404(0.04) 801-826(0.58)                                                                     |
| gnl UG Hs#S1731303  | 1.91 | 2 394-420(1.14) 689-715(1.91)                                                                                   |
| gnl UG Hs#S15632713 | 1.01 | 1 70-95(1.01)                                                                                                   |
| gnl UG Hs#S3333687  | 0.17 | 1 270-296(0.17)                                                                                                 |
| gnl UG Hs#S998748   | 1.43 | 3 328-354(0.66) 746-772(1.43) 1362-1387(0.30)                                                                   |
| gnl UG Hs#S1972420  | 3.56 | 2 1250-1275(0.07) 1517-1543(3.56)                                                                               |
| gnl UG Hs#S1727845  | 4.11 | 1 564-589(4.11)                                                                                                 |
| gnl UG Hs#S4284994  | 0.4  | 2 6275-6302(0.14) 7555-7581(0.40)                                                                               |
| gnl UG Hs#S3219693  | 2.37 | 2 171-197(1.68) 504-527(2.37)                                                                                   |
| gnl UG Hs#S2139713  | 0.26 | 1 76-105(0.26)                                                                                                  |
| gnl UG Hs#S2294291  | 2.13 | 3 83-111(0.27) 265-290(1.79) 809-834(2.13)                                                                      |
| gnl UG Hs#S1729662  | 0.49 | 1 242-268(0.49)                                                                                                 |
| gnl UG Hs#S1729677  | 3.3  | 4 108-133(3.30) 327-356(0.89) 365-391(1.04) 958-983(1.36)                                                       |
| gnl UG Hs#S2140589  | 3.89 | 2 324-349(3.65) 362-387(3.89)                                                                                   |
| gnl UG Hs#S3220078  | 1.88 | 2 404-429(0.04) 2345-2368(1.88)                                                                                 |
| gnl UG Hs#S2139186  | 6.37 | 7 534-559(3.46) 1265-1290(2.30) 1300-1324(0.02) 1452-1475(2.78) 1793-1818(0.01) 1824-1849(6.37) 2372-2397(0.56) |
| gnl UG Hs#S1728298  | 1.34 | 1 143-168(1.34)                                                                                                 |
| gnl UG Hs#S2139652  | 1.39 | 1 1180-1205(1.39)                                                                                               |
| gnl UG Hs#S816235   | 2.11 | 1 609-636(2.11)                                                                                                 |
| gnl UG Hs#S3219132  | 1.21 | 2 18-43(0.50) 362-387(1.21)                                                                                     |
| gnl UG Hs#S1727556  | 2.01 | 2 462-486(1.81) 561-587(2.01)                                                                                   |
| gnl UG Hs#S2140317  | 1.43 | 2 101-126(0.65) 232-257(1.43)                                                                                   |
| gnl UG Hs#S1726426  | 1.82 | 1 618-644(1.82)                                                                                                 |
| gnl UG Hs#S4818921  | 1.4  | 5 924-952(1.40) 1208-1236(1.01) 2072-2097(1.29) 2178-2205(1.13) 2398-2426(0.16)                                 |
| gnl UG Hs#S4811383  | 1.57 | 1 412-437(1.57)                                                                                                 |
| gnl UG Hs#S1727671  | 0.72 | 1 554-579(0.72)                                                                                                 |
| gnl UG Hs#S4392393  | 0.56 | 1 11-35(0.56)                                                                                                   |
| gnl UG Hs#S4824006  | 3.08 | 1 257-282(3.08)                                                                                                 |
| gnl UG Hs#S2294636  | 0.2  | 1 572-597(0.20)                                                                                                 |
| gnl UG Hs#S1728567  | 1.23 | 3 639-665(0.76) 852-877(1.23) 977-1002(0.91)                                                                    |
| gnl UG Hs#S4553514  | 1.16 | 2 661-684(0.68) 1547-1569(1.16)                                                                                 |
| gnl UG Hs#S10831793 | 1.13 | 1 327-352(1.13)                                                                                                 |
| gnl UG Hs#S1732093  | 1.76 | 3 110-136(1.76) 82-107(0.56) 845-871(0.04)                                                                      |
| gnl UG Hs#S3219615  | 1.98 | 4 291-315(0.22) 324-351(1.98) 651-677(1.40) 1126-1151(0.47)                                                     |
| gnl UG Hs#S3542651  | 1.34 | 1 399-422(1.34)                                                                                                 |

|                     |      |                                                                                                                             |
|---------------------|------|-----------------------------------------------------------------------------------------------------------------------------|
| gnl UG Hs#S3439017  | 2.14 | 1 22-50(2.14)                                                                                                               |
| gnl UG Hs#S3219199  | 1.37 | 1 169-194(1.37)                                                                                                             |
| gnl UG Hs#S4616669  | 3.13 | 1 175-203(3.13)                                                                                                             |
| gnl UG Hs#S4618834  | 3.11 | 1 501-526(3.11)                                                                                                             |
| gnl UG Hs#S1732444  | 0.57 | 1 1070-1096(0.57)                                                                                                           |
| gnl UG Hs#S3438719  | 0.44 | 1 116-142(0.44)                                                                                                             |
| gnl UG Hs#S1569309  | 1.81 | 4 623-650(0.11) 720-748(1.07) 885-913(1.81) 1082-1107(1.73)                                                                 |
| gnl UG Hs#S15846838 | 1.24 | 4 303-328(0.24) 381-408(1.24) 520-545(0.07) 620-649(0.16)                                                                   |
| gnl UG Hs#S1728625  | 0.44 | 1 1141-1167(0.44)                                                                                                           |
| gnl UG Hs#S4617194  | 1.3  | 1 654-679(1.30)                                                                                                             |
| gnl UG Hs#S4826920  | 4.53 | 1 823-848(4.53)                                                                                                             |
| gnl UG Hs#S3438827  | 0.3  | 1 549-572(0.30)                                                                                                             |
| gnl UG Hs#S3619297  | 0.57 | 1 178-203(0.57)                                                                                                             |
| gnl UG Hs#S1726754  | 8.85 | 2 548-573(0.14) 787-812(8.85)                                                                                               |
| gnl UG Hs#S2293462  | 1.84 | 4 847-873(0.91) 874-900(0.72) 1207-1232(1.58) 1481-1506(1.84)                                                               |
| gnl UG Hs#S1727246  | 3.85 | 2 958-982(0.84) 1313-1338(3.85)                                                                                             |
| gnl UG Hs#S4615051  | 2.42 | 2 1116-1143(2.42) 2199-2227(1.33)                                                                                           |
| gnl UG Hs#S7112126  | 0.98 | 1 21-47(0.98)                                                                                                               |
| gnl UG Hs#S2655065  | 2.85 | 1 1098-1123(2.85)                                                                                                           |
| gnl UG Hs#S1731630  | 3.5  | 2 140-165(3.50) 1620-1646(0.62)                                                                                             |
| gnl UG Hs#S3219918  | 5.05 | 8 182-208(1.17) 537-563(3.08) 594-621(1.04) 1650-1678(1.40) 2063-2090(0.84) 2350-2378(0.72) 2801-2828(3.14) 3130-3155(5.05) |
| gnl UG Hs#S1730428  | 0.43 | 1 208-235(0.43)                                                                                                             |
| gnl UG Hs#S3814519  | 0.07 | 1 257-282(0.07)                                                                                                             |
| gnl UG Hs#S1824300  | 4.5  | 2 656-681(0.16) 1946-1971(4.50)                                                                                             |
| gnl UG Hs#S4813579  | 0.17 | 1 59-85(0.17)                                                                                                               |
| gnl UG Hs#S2293918  | 0.67 | 2 78-104(0.67) 276-301(0.24)                                                                                                |
| gnl UG Hs#S2294039  | 1.5  | 4 1037-1063(1.50) 1118-1145(0.36) 1656-1683(0.02) 1748-1776(0.08)                                                           |
| gnl UG Hs#S1729025  | 2.5  | 1 641-666(2.50)                                                                                                             |
| gnl UG Hs#S1731672  | 3.89 | 4 214-240(2.50) 906-929(1.36) 1471-1496(0.40) 1500-1526(3.89)                                                               |
| gnl UG Hs#S4546246  | 1.89 | 2 1594-1619(1.89) 1695-1720(0.07)                                                                                           |
| gnl UG Hs#S2139328  | 1.4  | 1 136-162(1.40)                                                                                                             |
| gnl UG Hs#S5494804  | 0.13 | 1 1541-1569(0.13)                                                                                                           |
| gnl UG Hs#S1727371  | 1.73 | 3 277-302(0.75) 499-524(0.30) 643-671(1.73)                                                                                 |
| gnl UG Hs#S4614354  | 3.46 | 2 294-318(3.46) 342-367(1.04)                                                                                               |
| gnl UG Hs#S1728020  | 0.53 | 1 950-975(0.53)                                                                                                             |
| gnl UG Hs#S2294033  | 4.04 | 1 174-199(4.04)                                                                                                             |
| gnl UG Hs#S7112695  | 0.37 | 2 592-617(0.04) 751-777(0.37)                                                                                               |
| gnl UG Hs#S3219036  | 1.2  | 1 217-242(1.20)                                                                                                             |
| gnl UG Hs#S2139528  | 2.86 | 4 1498-1523(1.20) 1637-1662(0.30) 2306-2332(0.07) 3127-3153(2.86)                                                           |
| gnl UG Hs#S10831875 | 0.62 | 1 959-982(0.62)                                                                                                             |
| gnl UG Hs#S4815844  | 2.2  | 5 137-165(0.66) 284-310(0.30) 828-854(2.20) 863-890(0.85) 1798-1823(0.36)                                                   |
| gnl UG Hs#S1727143  | 0.75 | 2 409-434(0.75) 575-604(0.56)                                                                                               |
| gnl UG Hs#S3988950  | 3.04 | 1 99-124(3.04)                                                                                                              |
| gnl UG Hs#S4046236  | 2.07 | 7 81-108(2.03) 222-248(1.09) 443-469(1.50) 880-905(0.55) 1213-1239(1.82) 1505-1530(2.07) 2175-2200(1.82)                    |
| gnl UG Hs#S3993840  | 0.98 | 1 214-239(0.98)                                                                                                             |
| gnl UG Hs#S1728391  | 1.79 | 2 269-294(1.79) 328-354(0.46)                                                                                               |
| gnl UG Hs#S4823466  | 1.89 | 1 3122-3145(1.89)                                                                                                           |
| gnl UG Hs#S1729953  | 1.01 | 1 278-303(1.01)                                                                                                             |
| gnl UG Hs#S4825886  | 3.04 | 3 575-600(3.04) 729-755(0.62) 1099-1122(0.72)                                                                               |
| gnl UG Hs#S3601679  | 1.5  | 3 96-122(1.50) 591-620(0.59) 768-793(1.33)                                                                                  |
| gnl UG Hs#S15631497 | 1.58 | 1 182-206(1.58)                                                                                                             |
| gnl UG Hs#S7111526  | 2.89 | 3 4-29(2.89) 456-485(0.39) 832-857(2.01)                                                                                    |
| gnl UG Hs#S2293749  | 1.08 | 1 630-655(1.08)                                                                                                             |
| gnl UG Hs#S1729805  | 0.42 | 1 234-262(0.42)                                                                                                             |



|                     |      |                                                                                                                            |
|---------------------|------|----------------------------------------------------------------------------------------------------------------------------|
| gnl UG Hs#S5860316  | 1.53 | 2 126-151(1.53) 353-379(1.08)                                                                                              |
| gnl UG Hs#S4816673  | 0.26 | 1 225-251(0.26)                                                                                                            |
| gnl UG Hs#S1727631  | 1.5  | 1 67-93(1.50)                                                                                                              |
| gnl UG Hs#S1729817  | 0.39 | 1 592-617(0.39)                                                                                                            |
| gnl UG Hs#S553743   | 0.89 | 1 475-500(0.89)                                                                                                            |
| gnl UG Hs#S3438743  | 5.12 | 5 634-660(0.08) 940-965(0.48) 2537-2562(5.12) 2622-2647(3.72) 2761-2787(1.34)                                              |
| gnl UG Hs#S4046392  | 3.97 | 2 90-115(3.97) 1508-1533(0.30)                                                                                             |
| gnl UG Hs#S3438895  | 1.07 | 2 496-522(0.21) 976-1001(1.07)                                                                                             |
| gnl UG Hs#S7110479  | 0.65 | 1 1181-1206(0.65)                                                                                                          |
| gnl UG Hs#S3619635  | 0.74 | 1 293-318(0.74)                                                                                                            |
| gnl UG Hs#S2139999  | 0.2  | 2 146-171(0.13) 255-284(0.20)                                                                                              |
| gnl UG Hs#S1728027  | 2.3  | 4 402-427(0.93) 500-525(2.13) 1833-1859(2.30) 1908-1933(0.04)                                                              |
| gnl UG Hs#S1731648  | 3.62 | 1 948-973(3.62)                                                                                                            |
| gnl UG Hs#S3323210  | 1.04 | 1 463-488(1.04)                                                                                                            |
| gnl UG Hs#S4554718  | 2.27 | 3 185-210(0.72) 573-601(1.06) 772-798(2.27)                                                                                |
| gnl UG Hs#S2139972  | 0.5  | 2 333-358(0.24) 1032-1057(0.50)                                                                                            |
| gnl UG Hs#S3438750  | 0.63 | 1 223-248(0.63)                                                                                                            |
| gnl UG Hs#S1728213  | 0.2  | 1 84-110(0.20)                                                                                                             |
| gnl UG Hs#S5516729  | 0.78 | 3 621-650(0.78) 896-921(0.39) 1454-1479(0.20)                                                                              |
| gnl UG Hs#S2293324  | 2.22 | 1 275-298(2.22)                                                                                                            |
| gnl UG Hs#S3601857  | 0.4  | 2 181-206(0.04) 475-500(0.40)                                                                                              |
| gnl UG Hs#S1731178  | 0.53 | 1 253-278(0.53)                                                                                                            |
| gnl UG Hs#S340      | 0.46 | 4 20-46(0.27) 125-151(0.46) 1180-1205(0.07) 1428-1454(0.43)                                                                |
| gnl UG Hs#S14813055 | 0.14 | 1 49-74(0.14)                                                                                                              |
| gnl UG Hs#S2139303  | 1.68 | 3 175-200(1.68) 277-303(0.91) 696-722(1.49)                                                                                |
| gnl UG Hs#S3439054  | 2.08 | 4 201-229(0.42) 278-304(0.42) 665-690(2.04) 830-856(2.08)                                                                  |
| gnl UG Hs#S3619196  | 1.56 | 1 1571-1596(1.56)                                                                                                          |
| gnl UG Hs#S3837597  | 0.11 | 1 2398-2423(0.11)                                                                                                          |
| gnl UG Hs#S15635243 | 0.2  | 1 1571-1596(0.20)                                                                                                          |
| gnl UG Hs#S4807872  | 2.15 | 2 40-65(2.15) 323-349(0.12)                                                                                                |
| gnl UG Hs#S2294190  | 2.01 | 4 560-586(0.82) 960-988(0.61) 1015-1042(2.01) 1457-1483(0.30)                                                              |
| gnl UG Hs#S5931248  | 1.27 | 1 962-988(1.27)                                                                                                            |
| gnl UG Hs#S1731341  | 1.43 | 1 575-600(1.43)                                                                                                            |
| gnl UG Hs#S4615158  | 0.77 | 2 542-567(0.66) 796-819(0.77)                                                                                              |
| gnl UG Hs#S1728482  | 0.94 | 2 345-370(0.94) 592-617(0.20)                                                                                              |
| gnl UG Hs#S1730052  | 3.26 | 6 381-406(0.21) 471-496(0.80) 1125-1151(2.76) 1507-1535(1.30) 1691-1717(1.17) 3630-3655(3.26)                              |
| gnl UG Hs#S1727953  | 3.53 | 2 497-522(0.40) 560-585(3.53)                                                                                              |
| gnl UG Hs#S1824413  | 0.21 | 1 316-342(0.21)                                                                                                            |
| gnl UG Hs#S3439057  | 1.3  | 2 60-86(0.01) 111-136(1.30)                                                                                                |
| gnl UG Hs#S3220042  | 3.04 | 1 1099-1124(3.04)                                                                                                          |
| gnl UG Hs#S14802450 | 2.47 | 4 338-364(0.62) 447-472(2.47) 515-540(0.81) 562-588(0.10)                                                                  |
| gnl UG Hs#S1726671  | 0.69 | 1 289-314(0.69)                                                                                                            |
| gnl UG Hs#S2294264  | 2.72 | 5 475-503(1.40) 789-819(0.92) 1237-1265(2.72) 1290-1315(1.07) 1322-1347(0.72)                                              |
| gnl UG Hs#S15639206 | 0.84 | 1 300-325(0.84)                                                                                                            |
| gnl UG Hs#S4809567  | 2.59 | 1 4673-4701(2.59)                                                                                                          |
| gnl UG Hs#S3438836  | 1.59 | 1 209-235(1.59)                                                                                                            |
| gnl UG Hs#S1730764  | 3.62 | 2 192-217(3.62) 236-261(1.39)                                                                                              |
| gnl UG Hs#S1731276  | 0.67 | 1 507-532(0.67)                                                                                                            |
| gnl UG Hs#S3601470  | 3.95 | 8 89-116(2.36) 155-181(1.76) 622-647(2.82) 1189-1214(3.95) 1229-1257(1.02) 1299-1325(0.84) 1831-1858(0.08) 2022-2048(2.01) |
| gnl UG Hs#S3973054  | 6.29 | 1 721-746(6.29)                                                                                                            |
| gnl UG Hs#S4045804  | 1.65 | 2 43-68(0.48) 459-484(1.65)                                                                                                |
| gnl UG Hs#S4808393  | 1.4  | 1 457-484(1.40)                                                                                                            |
| gnl UG Hs#S4621186  | 1.87 | 4 281-307(0.76) 793-817(1.87) 828-854(0.94) 1044-1069(1.14)                                                                |
| gnl UG Hs#S1731166  | 1.4  | 1 1096-1121(1.40)                                                                                                          |

|                     |      |   |                                                                                                                                               |
|---------------------|------|---|-----------------------------------------------------------------------------------------------------------------------------------------------|
| gnl UG Hs#S3219268  | 0.04 | 1 | 2375-2401(0.04)                                                                                                                               |
| gnl UG Hs#S4631396  | 3.4  | 5 | 579-604(0.28) 763-788(1.40) 869-894(3.40) 1302-1327(1.98) 1396-1421(2.33)                                                                     |
| gnl UG Hs#S4824634  | 2.3  | 3 | 57-80(1.62) 1641-1666(0.43) 1826-1854(2.30)                                                                                                   |
| gnl UG Hs#S1729691  | 0.3  | 2 | 1307-1333(0.30) 1334-1360(0.04)                                                                                                               |
| gnl UG Hs#S5978564  | 0.14 | 1 | 242-267(0.14)                                                                                                                                 |
| gnl UG Hs#S1727475  | 0.26 | 1 | 171-196(0.26)                                                                                                                                 |
| gnl UG Hs#S2294431  | 3.39 | 2 | 2651-2676(3.39) 2725-2750(1.18)                                                                                                               |
| gnl UG Hs#S2139608  | 3.75 | 6 | 226-251(1.87) 938-964(0.78) 1033-1059(1.04) 1153-1179(3.75) 1792-1816(0.62) 1914-1940(1.17)                                                   |
| gnl UG Hs#S4553566  | 4.63 | 5 | 87-110(0.17) 444-469(2.53) 898-924(0.71) 1345-1369(0.45) 1634-1661(4.63)                                                                      |
| gnl UG Hs#S7110136  | 1.21 | 3 | 974-999(1.21) 1082-1107(0.46) 1375-1401(0.40)                                                                                                 |
| gnl UG Hs#S2294205  | 6.18 | 1 | 1899-1925(6.18)                                                                                                                               |
| gnl UG Hs#S15631682 | 1.27 | 1 | 709-737(1.27)                                                                                                                                 |
| gnl UG Hs#S1727255  | 4.85 | 4 | 2463-2488(0.40) 3114-3139(0.40) 3413-3438(4.85) 3763-3791(1.55)                                                                               |
| gnl UG Hs#S11046639 | 3.2  | 2 | 322-346(3.20) 408-433(2.50)                                                                                                                   |
| gnl UG Hs#S10832415 | 2.08 | 3 | 221-248(1.02) 327-353(2.08) 411-437(0.13)                                                                                                     |
| gnl UG Hs#S4044804  | 3.37 | 4 | 127-152(3.37) 726-751(0.23) 1690-1715(0.84) 2546-2572(3.30)                                                                                   |
| gnl UG Hs#S1729555  | 4.04 | 9 | 551-576(0.13) 1913-1938(4.04) 2132-2158(1.43) 2252-2280(0.58) 2775-2800(1.30) 2908-2936(0.31) 4143-4169(1.23) 4292-4317(1.98) 5294-5319(0.62) |
| gnl UG Hs#S14802294 | 2.75 | 1 | 199-224(2.75)                                                                                                                                 |
| gnl UG Hs#S1727171  | 0.55 | 1 | 459-484(0.55)                                                                                                                                 |
| gnl UG Hs#S3438697  | 2.91 | 2 | 97-123(2.91) 2210-2235(0.13)                                                                                                                  |
| gnl UG Hs#S2294182  | 0.23 | 1 | 932-958(0.23)                                                                                                                                 |
| gnl UG Hs#S1730249  | 2.52 | 1 | 227-252(2.52)                                                                                                                                 |
| gnl UG Hs#S1727066  | 0.17 | 1 | 535-560(0.17)                                                                                                                                 |
| gnl UG Hs#S1728114  | 2.98 | 1 | 277-302(2.98)                                                                                                                                 |
| gnl UG Hs#S4284979  | 0.3  | 1 | 35-63(0.30)                                                                                                                                   |
| gnl UG Hs#S3219070  | 0.11 | 1 | 1381-1407(0.11)                                                                                                                               |
| gnl UG Hs#S4826014  | 4.04 | 6 | 52-78(0.48) 2265-2288(1.92) 2338-2363(0.90) 2377-2402(4.04) 2473-2498(0.39) 2687-2714(3.72)                                                   |
| gnl UG Hs#S4046031  | 0.04 | 1 | 1074-1100(0.04)                                                                                                                               |
| gnl UG Hs#S1726839  | 0.85 | 2 | 647-673(0.43) 1277-1304(0.85)                                                                                                                 |
| gnl UG Hs#S1727866  | 0.12 | 1 | 783-808(0.12)                                                                                                                                 |
| gnl UG Hs#S5978639  | 0.14 | 1 | 135-160(0.14)                                                                                                                                 |
| gnl UG Hs#S1972966  | 0.17 | 1 | 137-162(0.17)                                                                                                                                 |
| gnl UG Hs#S1726294  | 0.72 | 1 | 185-208(0.72)                                                                                                                                 |
| gnl UG Hs#S3218878  | 4.82 | 6 | 1065-1090(0.65) 1850-1875(4.82) 2494-2519(0.14) 2591-2616(0.04) 2744-2772(3.20) 2815-2841(0.21)                                               |
| gnl UG Hs#S2140724  | 1.01 | 1 | 72-98(1.01)                                                                                                                                   |
| gnl UG Hs#S3219004  | 3.57 | 1 | 558-583(3.57)                                                                                                                                 |
| gnl UG Hs#S3603396  | 2.94 | 2 | 627-653(2.94) 766-794(0.08)                                                                                                                   |
| gnl UG Hs#S1731220  | 1.03 | 1 | 134-161(1.03)                                                                                                                                 |
| gnl UG Hs#S1731972  | 0.14 | 1 | 55-79(0.14)                                                                                                                                   |
| gnl UG Hs#S1727098  | 0.98 | 1 | 451-476(0.98)                                                                                                                                 |
| gnl UG Hs#S1727986  | 5.5  | 3 | 156-182(0.58) 769-795(5.50) 1082-1107(0.26)                                                                                                   |
| gnl UG Hs#S3988360  | 1.3  | 1 | 1007-1032(1.30)                                                                                                                               |
| gnl UG Hs#S3355664  | 3.01 | 1 | 644-671(3.01)                                                                                                                                 |
| gnl UG Hs#S3355548  | 1.8  | 6 | 61-85(0.01) 934-958(1.30) 1165-1189(1.21) 1305-1335(1.56) 1960-1985(0.04) 2113-2138(1.80)                                                     |
| gnl UG Hs#S1732325  | 1.2  | 1 | 191-218(1.20)                                                                                                                                 |
| gnl UG Hs#S1731611  | 2.04 | 1 | 467-493(2.04)                                                                                                                                 |
| gnl UG Hs#S4392128  | 0.5  | 1 | 3574-3599(0.50)                                                                                                                               |
| gnl UG Hs#S4825491  | 2.3  | 7 | 389-414(0.65) 811-839(1.50) 1101-1127(0.69) 1349-1374(2.30) 1910-1936(1.12) 2257-2283(1.17) 2389-2415(0.89)                                   |
| gnl UG Hs#S2293422  | 0.91 | 2 | 330-356(0.91) 1105-1133(0.08)                                                                                                                 |
| gnl UG Hs#S3803776  | 0.37 | 1 | 1203-1229(0.37)                                                                                                                               |
| gnl UG Hs#S3355469  | 0.74 | 2 | 277-302(0.62) 431-456(0.74)                                                                                                                   |
| gnl UG Hs#S5978515  | 4.15 | 2 | 2602-2628(1.08) 3171-3196(4.15)                                                                                                               |
| gnl UG Hs#S2139490  | 5.3  | 1 | 955-980(5.30)                                                                                                                                 |
| gnl UG Hs#S1731598  | 0.97 | 1 | 120-145(0.97)                                                                                                                                 |

|                     |      |                                                                                                           |
|---------------------|------|-----------------------------------------------------------------------------------------------------------|
| gnl UG Hs#S3603053  | 1.3  | 1 1523-1548(1.30)                                                                                         |
| gnl UG Hs#S4807582  | 3.58 | 3 52-77(3.58) 162-187(1.14) 198-224(1.13)                                                                 |
| gnl UG Hs#S5978546  | 2.5  | 4 143-169(2.50) 193-218(0.72) 594-619(1.20) 912-935(0.30)                                                 |
| gnl UG Hs#S2139685  | 1.62 | 7 173-201(1.62) 292-317(1.47) 462-488(0.08) 756-783(1.20) 921-946(0.11) 1006-1031(1.26) 1260-1284(0.26)   |
| gnl UG Hs#S1728205  | 0.72 | 1 173-198(0.72)                                                                                           |
| gnl UG Hs#S7111706  | 2.14 | 1 466-492(2.14)                                                                                           |
| gnl UG Hs#S5978622  | 1.17 | 1 234-260(1.17)                                                                                           |
| gnl UG Hs#S4811656  | 4.05 | 5 21-47(1.27) 198-223(1.07) 799-824(2.38) 1226-1251(2.96) 1814-1839(4.05)                                 |
| gnl UG Hs#S2139407  | 0.11 | 1 115-140(0.11)                                                                                           |
| gnl UG Hs#S1731369  | 1.17 | 1 420-445(1.17)                                                                                           |
| gnl UG Hs#S1730566  | 5.4  | 2 2864-2890(5.40) 2989-3014(0.08)                                                                         |
| gnl UG Hs#S2293614  | 1.4  | 1 523-551(1.40)                                                                                           |
| gnl UG Hs#S3438269  | 5.27 | 1 603-629(5.27)                                                                                           |
| gnl UG Hs#S1728635  | 1.57 | 4 942-967(0.14) 1265-1291(1.26) 1299-1324(0.29) 1330-1356(1.57)                                           |
| gnl UG Hs#S1731473  | 0.07 | 1 592-617(0.07)                                                                                           |
| gnl UG Hs#S6159056  | 3.08 | 2 323-348(3.04) 1053-1079(3.08)                                                                           |
| gnl UG Hs#S4554511  | 0.82 | 1 274-299(0.82)                                                                                           |
| gnl UG Hs#S2139381  | 2.72 | 3 143-168(2.72) 1032-1057(1.80) 1358-1386(1.04)                                                           |
| gnl UG Hs#S1824434  | 0.54 | 2 2885-2909(0.54) 3569-3594(0.20)                                                                         |
| gnl UG Hs#S1729014  | 0.08 | 1 296-324(0.08)                                                                                           |
| gnl UG Hs#S1732036  | 1.82 | 3 187-212(1.82) 357-382(0.79) 1104-1130(0.36)                                                             |
| gnl UG Hs#S5860363  | 2.15 | 1 1718-1744(2.15)                                                                                         |
| gnl UG Hs#S2294450  | 1.18 | 2 197-222(1.18) 600-625(0.50)                                                                             |
| gnl UG Hs#S2140130  | 1.13 | 3 188-213(0.43) 288-313(0.57) 1055-1080(1.13)                                                             |
| gnl UG Hs#S3438688  | 3.26 | 3 95-121(1.71) 195-220(2.90) 451-476(3.26)                                                                |
| gnl UG Hs#S1728745  | 1.3  | 1 231-256(1.30)                                                                                           |
| gnl UG Hs#S1729727  | 6.62 | 7 73-98(0.36) 470-495(6.62) 657-682(1.58) 1968-1994(1.43) 2380-2406(0.21) 2585-2611(0.94) 2616-2642(0.18) |
| gnl UG Hs#S3603838  | 0.23 | 1 45-70(0.23)                                                                                             |
| gnl UG Hs#S4820884  | 0.49 | 2 1343-1371(0.49) 1377-1403(0.26)                                                                         |
| gnl UG Hs#S1728709  | 0.94 | 1 798-823(0.94)                                                                                           |
| gnl UG Hs#S2140010  | 0.82 | 1 143-170(0.82)                                                                                           |
| gnl UG Hs#S472687   | 3.4  | 1 375-403(3.40)                                                                                           |
| gnl UG Hs#S3219692  | 2.69 | 2 114-140(0.00) 253-278(2.69)                                                                             |
| gnl UG Hs#S2139817  | 1.4  | 1 151-179(1.40)                                                                                           |
| gnl UG Hs#S1726493  | 1.34 | 1 231-257(1.34)                                                                                           |
| gnl UG Hs#S3993731  | 3.04 | 4 467-493(0.51) 503-528(3.04) 860-885(0.79) 894-920(0.86)                                                 |
| gnl UG Hs#S3219380  | 2.81 | 2 126-151(1.15) 161-189(2.81)                                                                             |
| gnl UG Hs#S4825345  | 1.3  | 4 118-142(1.16) 183-209(0.66) 1087-1112(1.30) 1254-1280(0.60)                                             |
| gnl UG Hs#S3438524  | 0.45 | 1 573-600(0.45)                                                                                           |
| gnl UG Hs#S3219015  | 1.47 | 1 1438-1463(1.47)                                                                                         |
| gnl UG Hs#S4828603  | 0.01 | 1 28-54(0.01)                                                                                             |
| gnl UG Hs#S3601756  | 4.53 | 2 99-123(0.94) 124-151(4.53)                                                                              |
| gnl UG Hs#S4545906  | 2.24 | 2 107-135(0.17) 336-363(2.24)                                                                             |
| gnl UG Hs#S3601728  | 0.17 | 2 242-269(0.10) 324-349(0.17)                                                                             |
| gnl UG Hs#S1969178  | 2.3  | 1 810-837(2.30)                                                                                           |
| gnl UG Hs#S3619214  | 0.1  | 1 607-633(0.10)                                                                                           |
| gnl UG Hs#S2139392  | 3.94 | 2 302-327(3.94) 508-533(0.26)                                                                             |
| gnl UG Hs#S4284840  | 0.17 | 1 502-527(0.17)                                                                                           |
| gnl UG Hs#S2294523  | 1.24 | 3 155-180(1.16) 715-740(0.36) 1011-1037(1.24)                                                             |
| gnl UG Hs#S3993849  | 1.79 | 1 755-780(1.79)                                                                                           |
| gnl UG Hs#S4631452  | 0.4  | 2 96-122(0.03) 549-577(0.40)                                                                              |
| gnl UG Hs#S2294477  | 1.8  | 3 189-214(1.26) 343-368(1.80) 689-715(0.13)                                                               |
| gnl UG Hs#S2140259  | 1.88 | 2 402-429(1.88) 618-644(1.26)                                                                             |
| gnl UG Hs#S15631490 | 0.98 | 2 192-216(0.84) 962-987(0.98)                                                                             |

|                     |      |    |                 |                 |                 |                 |                 |                 |                 |                 |                 |                 |                 |
|---------------------|------|----|-----------------|-----------------|-----------------|-----------------|-----------------|-----------------|-----------------|-----------------|-----------------|-----------------|-----------------|
| gnl UG Hs#S1728459  | 2.04 | 5  | 334-360(0.17)   | 461-487(0.68)   | 659-687(1.75)   | 1083-1108(1.13) | 1185-1211(2.04) |                 |                 |                 |                 |                 |                 |
| gnl UG Hs#S2140659  | 2.55 | 1  | 27-53(2.55)     |                 |                 |                 |                 |                 |                 |                 |                 |                 |                 |
| gnl UG Hs#S1728261  | 1.55 | 1  | 699-724(1.55)   |                 |                 |                 |                 |                 |                 |                 |                 |                 |                 |
| gnl UG Hs#S1726592  | 1.33 | 2  | 452-478(1.01)   | 1301-1326(1.33) |                 |                 |                 |                 |                 |                 |                 |                 |                 |
| gnl UG Hs#S4436224  | 3.62 | 1  | 216-242(3.62)   |                 |                 |                 |                 |                 |                 |                 |                 |                 |                 |
| gnl UG Hs#S2329495  | 2.33 | 5  | 702-726(1.03)   | 895-921(1.23)   | 1477-1503(0.44) | 1567-1595(2.33) | 2242-2266(0.23) |                 |                 |                 |                 |                 |                 |
| gnl UG Hs#S15635186 | 2.91 | 4  | 472-497(1.85)   | 768-793(1.50)   | 865-891(0.11)   | 1164-1192(2.91) |                 |                 |                 |                 |                 |                 |                 |
| gnl UG Hs#S3601747  | 4.31 | 2  | 1238-1263(4.31) | 1676-1701(1.14) |                 |                 |                 |                 |                 |                 |                 |                 |                 |
| gnl UG Hs#S14802287 | 5.97 | 3  | 590-615(5.97)   | 818-843(3.04)   | 857-882(1.52)   |                 |                 |                 |                 |                 |                 |                 |                 |
| gnl UG Hs#S4808752  | 0.03 | 1  | 481-509(0.03)   |                 |                 |                 |                 |                 |                 |                 |                 |                 |                 |
| gnl UG Hs#S11046744 | 4.92 | 5  | 66-91(0.75)     | 370-396(1.26)   | 654-679(0.19)   | 727-753(4.92)   | 1032-1058(3.89) |                 |                 |                 |                 |                 |                 |
| gnl UG Hs#S4284717  | 1.65 | 2  | 58-81(1.65)     | 177-203(1.27)   |                 |                 |                 |                 |                 |                 |                 |                 |                 |
| gnl UG Hs#S15631674 | 1.3  | 1  | 1016-1041(1.30) |                 |                 |                 |                 |                 |                 |                 |                 |                 |                 |
| gnl UG Hs#S3355677  | 3.53 | 6  | 202-227(0.76)   | 2746-2771(1.58) | 2880-2905(0.67) | 3140-3165(3.53) | 3619-3647(0.30) | 3671-3696(1.07) |                 |                 |                 |                 |                 |
| gnl UG Hs#S2294198  | 0.85 | 1  | 88-111(0.85)    |                 |                 |                 |                 |                 |                 |                 |                 |                 |                 |
| gnl UG Hs#S3439156  | 0.43 | 1  | 3882-3907(0.43) |                 |                 |                 |                 |                 |                 |                 |                 |                 |                 |
| gnl UG Hs#S3601696  | 8.24 | 1  | 49-74(8.24)     |                 |                 |                 |                 |                 |                 |                 |                 |                 |                 |
| gnl UG Hs#S7112158  | 1.98 | 4  | 1450-1475(1.98) | 2604-2632(0.14) | 2797-2822(0.98) | 3623-3651(0.23) |                 |                 |                 |                 |                 |                 |                 |
| gnl UG Hs#S2138830  | 0.44 | 1  | 1095-1121(0.44) |                 |                 |                 |                 |                 |                 |                 |                 |                 |                 |
| gnl UG Hs#S3219489  | 2.31 | 3  | 263-288(0.72)   | 382-408(1.50)   | 1036-1061(2.31) |                 |                 |                 |                 |                 |                 |                 |                 |
| gnl UG Hs#S2293894  | 0.62 | 1  | 1137-1163(0.62) |                 |                 |                 |                 |                 |                 |                 |                 |                 |                 |
| gnl UG Hs#S3603046  | 0.08 | 1  | 985-1010(0.08)  |                 |                 |                 |                 |                 |                 |                 |                 |                 |                 |
| gnl UG Hs#S4553486  | 1.92 | 2  | 243-268(1.87)   | 582-609(1.92)   |                 |                 |                 |                 |                 |                 |                 |                 |                 |
| gnl UG Hs#S5931238  | 0.89 | 1  | 168-191(0.89)   |                 |                 |                 |                 |                 |                 |                 |                 |                 |                 |
| gnl UG Hs#S3219932  | 3.3  | 1  | 537-562(3.30)   |                 |                 |                 |                 |                 |                 |                 |                 |                 |                 |
| gnl UG Hs#S2294305  | 0.23 | 1  | 116-141(0.23)   |                 |                 |                 |                 |                 |                 |                 |                 |                 |                 |
| gnl UG Hs#S1728533  | 2.69 | 7  | 962-987(1.14)   | 1274-1300(1.50) | 1651-1676(0.39) | 2705-2730(0.13) | 3057-3085(1.09) | 3199-3228(2.65) | 3271-3296(2.69) |                 |                 |                 |                 |
| gnl UG Hs#S3438971  | 1.72 | 1  | 205-230(1.72)   |                 |                 |                 |                 |                 |                 |                 |                 |                 |                 |
| gnl UG Hs#S3619177  | 0.81 | 1  | 187-213(0.81)   |                 |                 |                 |                 |                 |                 |                 |                 |                 |                 |
| gnl UG Hs#S7111576  | 4.42 | 4  | 55-80(0.23)     | 478-503(1.30)   | 636-661(0.16)   | 851-879(4.42)   |                 |                 |                 |                 |                 |                 |                 |
| gnl UG Hs#S3993743  | 6.94 | 7  | 159-184(1.76)   | 454-482(4.20)   | 569-596(0.07)   | 850-874(6.94)   | 1087-1112(0.98) | 1238-1263(1.65) | 1367-1393(2.37) |                 |                 |                 |                 |
| gnl UG Hs#S3219248  | 3.3  | 11 | 251-276(1.14)   | 413-442(0.59)   | 519-544(0.36)   | 771-796(0.43)   | 899-924(3.30)   | 933-958(0.20)   | 1012-1037(0.11) | 1326-1354(1.66) | 1371-1396(0.58) | 2231-2259(0.81) | 3323-3348(0.07) |
| gnl UG Hs#S15643436 | 3.56 | 3  | 1249-1275(0.82) | 2337-2363(2.33) | 2383-2409(3.56) |                 |                 |                 |                 |                 |                 |                 |                 |
| gnl UG Hs#S3603036  | 4.17 | 4  | 173-198(0.07)   | 361-386(1.41)   | 1649-1675(2.42) | 1691-1717(4.17) |                 |                 |                 |                 |                 |                 |                 |
| gnl UG Hs#S1726719  | 4.62 | 4  | 1949-1974(0.94) | 2049-2074(4.62) | 3227-3255(1.97) | 3782-3808(1.23) |                 |                 |                 |                 |                 |                 |                 |
| gnl UG Hs#S10831467 | 3.79 | 3  | 350-375(1.34)   | 404-429(3.79)   | 531-558(1.86)   |                 |                 |                 |                 |                 |                 |                 |                 |
| gnl UG Hs#S2139664  | 2.32 | 2  | 370-395(2.32)   | 781-808(1.04)   |                 |                 |                 |                 |                 |                 |                 |                 |                 |
| gnl UG Hs#S3602359  | 0.07 | 1  | 652-679(0.07)   |                 |                 |                 |                 |                 |                 |                 |                 |                 |                 |
| gnl UG Hs#S3438861  | 1.78 | 5  | 61-87(0.50)     | 172-200(1.78)   | 209-235(0.62)   | 554-579(0.08)   | 861-886(0.76)   |                 |                 |                 |                 |                 |                 |
| gnl UG Hs#S1728999  | 3.24 | 9  | 526-551(0.62)   | 884-909(0.34)   | 922-946(3.24)   | 1045-1070(1.72) | 2506-2531(0.84) | 2867-2895(0.91) | 2947-2972(1.47) | 3215-3240(0.75) | 3318-3344(2.17) |                 |                 |
| gnl UG Hs#S4807957  | 3.34 | 6  | 168-190(0.71)   | 959-985(0.69)   | 1253-1279(3.34) | 1622-1648(0.08) | 2254-2280(1.23) | 2296-2324(0.47) |                 |                 |                 |                 |                 |
| gnl UG Hs#S1727790  | 0.69 | 1  | 1988-2014(0.69) |                 |                 |                 |                 |                 |                 |                 |                 |                 |                 |
| gnl UG Hs#S2294197  | 1.78 | 2  | 281-306(1.78)   | 1165-1190(0.14) |                 |                 |                 |                 |                 |                 |                 |                 |                 |
| gnl UG Hs#S2140244  | 1.72 | 1  | 282-308(1.72)   |                 |                 |                 |                 |                 |                 |                 |                 |                 |                 |
| gnl UG Hs#S1729918  | 1.69 | 2  | 535-560(1.24)   | 630-658(1.69)   |                 |                 |                 |                 |                 |                 |                 |                 |                 |
| gnl UG Hs#S3333548  | 3.11 | 9  | 243-271(0.85)   | 690-715(3.11)   | 828-853(0.53)   | 901-926(1.30)   | 950-975(1.13)   | 1736-1761(0.13) | 2175-2201(0.93) | 2332-2360(1.46) | 2724-2749(2.72) |                 |                 |
| gnl UG Hs#S4554565  | 0.57 | 1  | 661-687(0.57)   |                 |                 |                 |                 |                 |                 |                 |                 |                 |                 |
| gnl UG Hs#S5978791  | 1.3  | 2  | 506-531(0.39)   | 2371-2396(1.30) |                 |                 |                 |                 |                 |                 |                 |                 |                 |
| gnl UG Hs#S3602303  | 0.08 | 1  | 148-173(0.08)   |                 |                 |                 |                 |                 |                 |                 |                 |                 |                 |
| gnl UG Hs#S1732457  | 1.07 | 3  | 49-74(1.07)     | 385-409(0.30)   | 443-468(0.98)   |                 |                 |                 |                 |                 |                 |                 |                 |
| gnl UG Hs#S2294219  | 2.53 | 3  | 240-266(2.53)   | 571-597(0.69)   | 639-664(2.23)   |                 |                 |                 |                 |                 |                 |                 |                 |
| gnl UG Hs#S2294611  | 1.5  | 1  | 213-239(1.50)   |                 |                 |                 |                 |                 |                 |                 |                 |                 |                 |
| gnl UG Hs#S1732266  | 1.98 | 3  | 521-549(1.98)   | 1110-1134(0.10) | 1312-1337(0.55) |                 |                 |                 |                 |                 |                 |                 |                 |
| gnl UG Hs#S1728429  | 1.72 | 4  | 132-155(0.43)   | 513-538(1.72)   | 629-654(0.62)   | 1197-1223(0.40) |                 |                 |                 |                 |                 |                 |                 |

|                     |      |    |                                                                                                                                                                                           |
|---------------------|------|----|-------------------------------------------------------------------------------------------------------------------------------------------------------------------------------------------|
| gnl UG Hs#S3438791  | 2.3  | 4  | 45-70(0.07) 114-140(0.36) 147-173(2.30) 180-204(0.45)                                                                                                                                     |
| gnl UG Hs#S4553479  | 0.41 | 1  | 936-961(0.41)                                                                                                                                                                             |
| gnl UG Hs#S1732395  | 2.04 | 1  | 1409-1434(2.04)                                                                                                                                                                           |
| gnl UG Hs#S1730106  | 1.42 | 2  | 78-104(0.56) 1385-1413(1.42)                                                                                                                                                              |
| gnl UG Hs#S4807791  | 1.39 | 1  | 1200-1225(1.39)                                                                                                                                                                           |
| gnl UG Hs#S4044873  | 0.56 | 1  | 722-747(0.56)                                                                                                                                                                             |
| gnl UG Hs#S3219764  | 2.04 | 1  | 509-534(2.04)                                                                                                                                                                             |
| gnl UG Hs#S11046697 | 0.5  | 1  | 1030-1056(0.50)                                                                                                                                                                           |
| gnl UG Hs#S3602295  | 3.08 | 4  | 96-121(3.08) 122-147(0.13) 476-502(1.07) 506-532(1.01)                                                                                                                                    |
| gnl UG Hs#S15640174 | 4.62 | 3  | 1422-1448(0.62) 2354-2382(0.18) 2892-2917(4.62)                                                                                                                                           |
| gnl UG Hs#S1824335  | 1.9  | 3  | 386-411(1.90) 547-574(0.36) 993-1018(0.79)                                                                                                                                                |
| gnl UG Hs#S2293876  | 0.07 | 1  | 81-108(0.07)                                                                                                                                                                              |
| gnl UG Hs#S2138846  | 2.36 | 4  | 256-281(2.36) 314-342(1.45) 455-481(0.91) 741-767(0.50)                                                                                                                                   |
| gnl UG Hs#S1729361  | 0.76 | 1  | 376-402(0.76)                                                                                                                                                                             |
| gnl UG Hs#S1726513  | 3.61 | 5  | 322-347(0.75) 1194-1219(2.39) 1367-1393(1.07) 1665-1691(1.17) 2075-2100(3.61)                                                                                                             |
| gnl UG Hs#S1731293  | 5.65 | 2  | 82-110(1.03) 309-334(5.65)                                                                                                                                                                |
| gnl UG Hs#S2293478  | 1.39 | 1  | 122-147(1.39)                                                                                                                                                                             |
| gnl UG Hs#S3219744  | 3.13 | 1  | 1292-1317(3.13)                                                                                                                                                                           |
| gnl UG Hs#S3439812  | 2.53 | 5  | 87-112(1.29) 395-423(0.30) 439-467(0.49) 511-536(0.97) 963-988(2.53)                                                                                                                      |
| gnl UG Hs#S3601654  | 4.36 | 5  | 815-840(1.30) 953-978(4.36) 1259-1284(0.90) 1606-1631(2.57) 1667-1692(0.20)                                                                                                               |
| gnl UG Hs#S1731355  | 0.17 | 1  | 278-306(0.17)                                                                                                                                                                             |
| gnl UG Hs#S3219798  | 0.98 | 2  | 678-703(0.98) 957-982(0.55)                                                                                                                                                               |
| gnl UG Hs#S2294255  | 2.78 | 2  | 76-101(2.78) 1365-1393(1.07)                                                                                                                                                              |
| gnl UG Hs#S4807558  | 0.33 | 1  | 105-131(0.33)                                                                                                                                                                             |
| gnl UG Hs#S4825083  | 0.76 | 1  | 449-475(0.76)                                                                                                                                                                             |
| gnl UG Hs#S2294411  | 5.78 | 5  | 86-111(5.78) 217-242(1.72) 316-342(0.63) 723-751(0.24) 865-890(1.94)                                                                                                                      |
| gnl UG Hs#S1726337  | 0.94 | 1  | 709-734(0.94)                                                                                                                                                                             |
| gnl UG Hs#S3601502  | 2.3  | 1  | 662-688(2.30)                                                                                                                                                                             |
| gnl UG Hs#S3218920  | 0.34 | 2  | 404-427(0.34) 433-458(0.24)                                                                                                                                                               |
| gnl UG Hs#S1727017  | 4.08 | 2  | 1941-1964(1.31) 2012-2038(4.08)                                                                                                                                                           |
| gnl UG Hs#S1728781  | 1.72 | 1  | 218-243(1.72)                                                                                                                                                                             |
| gnl UG Hs#S3219522  | 2.8  | 13 | 189-214(0.32) 642-665(2.30) 720-745(2.21) 1181-1209(0.66) 1231-1259(2.66) 1401-1427(1.84) 1440-1465(2.80) 1476-1504(0.30) 1560-1586(1.32) 1597-1622(0.40) 1742-1769(0.27) 2208-2233(0.14) |
| gnl UG Hs#S3438120  | 3.99 | 5  | 731-757(0.09) 956-982(3.99) 1255-1281(0.17) 1533-1559(0.66) 1819-1845(0.85)                                                                                                               |
| gnl UG Hs#S2140630  | 0.81 | 1  | 92-120(0.81)                                                                                                                                                                              |
| gnl UG Hs#S1727019  | 3.39 | 1  | 2115-2140(3.39)                                                                                                                                                                           |
| gnl UG Hs#S3219970  | 1.17 | 1  | 282-307(1.17)                                                                                                                                                                             |
| gnl UG Hs#S2293579  | 3.3  | 1  | 419-445(3.30)                                                                                                                                                                             |
| gnl UG Hs#S1726475  | 0.63 | 1  | 500-525(0.63)                                                                                                                                                                             |
| gnl UG Hs#S1728773  | 2.58 | 2  | 258-283(1.24) 455-481(2.58)                                                                                                                                                               |
| gnl UG Hs#S3219825  | 2.39 | 7  | 63-89(1.91) 157-182(1.43) 378-404(0.08) 859-887(1.49) 960-985(1.36) 1412-1437(2.39) 1585-1611(0.66)                                                                                       |
| gnl UG Hs#S3973074  | 7.62 | 8  | 334-360(1.81) 474-499(0.22) 506-532(7.62) 553-576(1.51) 697-723(0.93) 1289-1314(0.81) 1542-1567(0.57) 1782-1805(0.40)                                                                     |
| gnl UG Hs#S6091853  | 1.5  | 2  | 732-757(1.50) 1488-1514(0.50)                                                                                                                                                             |
| gnl UG Hs#S15644498 | 0.77 | 1  | 311-336(0.77)                                                                                                                                                                             |
| gnl UG Hs#S1726950  | 0.29 | 1  | 413-438(0.29)                                                                                                                                                                             |
| gnl UG Hs#S2140109  | 1.1  | 4  | 447-473(0.92) 1309-1334(0.07) 1909-1934(0.75) 2354-2381(1.10)                                                                                                                             |
| gnl UG Hs#S2139776  | 2.17 | 1  | 2038-2064(2.17)                                                                                                                                                                           |
| gnl UG Hs#S5978600  | 4.08 | 4  | 238-265(0.91) 526-551(1.04) 656-681(0.34) 1164-1190(4.08)                                                                                                                                 |
| gnl UG Hs#S1731817  | 1.05 | 2  | 746-773(0.79) 1005-1032(1.05)                                                                                                                                                             |
| gnl UG Hs#S4807846  | 0.57 | 1  | 868-894(0.57)                                                                                                                                                                             |
| gnl UG Hs#S1729294  | 1.98 | 3  | 1143-1168(1.89) 1964-1990(1.23) 2145-2171(1.98)                                                                                                                                           |
| gnl UG Hs#S4435740  | 1.8  | 5  | 1-25(1.80) 99-127(1.27) 242-270(1.76) 2281-2307(1.40) 2344-2370(1.27)                                                                                                                     |
| gnl UG Hs#S1727352  | 1.22 | 3  | 246-272(0.40) 312-339(1.22) 1218-1247(0.61)                                                                                                                                               |
| gnl UG Hs#S1729629  | 2.49 | 2  | 60-85(0.50) 310-335(2.49)                                                                                                                                                                 |
| gnl UG Hs#S15115707 | 2.79 | 2  | 336-361(1.89) 775-800(2.79)                                                                                                                                                               |

|                     |      |   |                                                                                                                 |
|---------------------|------|---|-----------------------------------------------------------------------------------------------------------------|
| gnl UG Hs#S1970039  | 1.04 | 3 | 115-140(0.20) 425-450(0.34) 515-540(1.04)                                                                       |
| gnl UG Hs#S3987204  | 1.4  | 2 | 325-350(1.40) 655-683(0.42)                                                                                     |
| gnl UG Hs#S1729536  | 0.94 | 3 | 2257-2282(0.94) 3263-3289(0.36) 4141-4167(0.71)                                                                 |
| gnl UG Hs#S1731776  | 0.13 | 1 | 451-476(0.13)                                                                                                   |
| gnl UG Hs#S5518206  | 1.07 | 1 | 125-152(1.07)                                                                                                   |
| gnl UG Hs#S15730318 | 4.04 | 6 | 627-652(4.04) 741-767(0.52) 1424-1449(2.89) 2191-2219(1.07) 2385-2410(1.07) 2431-2456(0.57)                     |
| gnl UG Hs#S7111971  | 1.67 | 1 | 967-992(1.67)                                                                                                   |
| gnl UG Hs#S4545752  | 0.84 | 1 | 1171-1196(0.84)                                                                                                 |
| gnl UG Hs#S11046638 | 1.82 | 2 | 826-852(0.82) 876-901(1.82)                                                                                     |
| gnl UG Hs#S2139238  | 4.21 | 1 | 21-46(4.21)                                                                                                     |
| gnl UG Hs#S4824552  | 2.45 | 1 | 95-122(2.45)                                                                                                    |
| gnl UG Hs#S1727503  | 4.94 | 1 | 99-124(4.94)                                                                                                    |
| gnl UG Hs#S2138779  | 1.24 | 1 | 50-76(1.24)                                                                                                     |
| gnl UG Hs#S5495035  | 1.89 | 2 | 64-89(1.89) 383-408(0.82)                                                                                       |
| gnl UG Hs#S1729855  | 1.82 | 3 | 77-103(0.30) 436-464(0.52) 685-711(1.82)                                                                        |
| gnl UG Hs#S4554635  | 1.2  | 1 | 287-312(1.20)                                                                                                   |
| gnl UG Hs#S1726996  | 0.82 | 2 | 143-168(0.26) 365-390(0.82)                                                                                     |
| gnl UG Hs#S3219625  | 1.85 | 3 | 318-342(1.11) 576-601(1.85) 1399-1424(0.72)                                                                     |
| gnl UG Hs#S3547221  | 1.42 | 3 | 816-842(0.59) 1330-1355(0.23) 1362-1390(1.42)                                                                   |
| gnl UG Hs#S15632766 | 1.37 | 3 | 930-955(0.13) 1249-1274(1.37) 1410-1435(0.53)                                                                   |
| gnl UG Hs#S2140166  | 0.94 | 1 | 15-41(0.94)                                                                                                     |
| gnl UG Hs#S2138785  | 2.62 | 1 | 243-268(2.62)                                                                                                   |
| gnl UG Hs#S1732115  | 0.24 | 1 | 1348-1371(0.24)                                                                                                 |
| gnl UG Hs#S2140311  | 0.58 | 1 | 176-202(0.58)                                                                                                   |
| gnl UG Hs#S1731965  | 0.08 | 1 | 1224-1249(0.08)                                                                                                 |
| gnl UG Hs#S1731201  | 0.04 | 1 | 200-225(0.04)                                                                                                   |
| gnl UG Hs#S1728043  | 3.01 | 3 | 741-767(3.01) 975-999(1.78) 1250-1277(0.30)                                                                     |
| gnl UG Hs#S3355622  | 0.14 | 1 | 256-279(0.14)                                                                                                   |
| gnl UG Hs#S4283980  | 0.82 | 2 | 625-650(0.82) 933-958(0.72)                                                                                     |
| gnl UG Hs#S15631795 | 4.62 | 7 | 240-265(4.40) 351-376(0.65) 580-605(0.12) 672-698(0.23) 1708-1733(3.17) 1883-1908(0.04) 2233-2258(4.62)         |
| gnl UG Hs#S1090731  | 1.08 | 3 | 3017-3042(0.17) 3632-3657(1.08) 4122-4148(0.07)                                                                 |
| gnl UG Hs#S4825584  | 2.46 | 1 | 253-278(2.46)                                                                                                   |
| gnl UG Hs#S1726478  | 0.27 | 1 | 417-442(0.27)                                                                                                   |
| gnl UG Hs#S3547207  | 1.04 | 1 | 461-487(1.04)                                                                                                   |
| gnl UG Hs#S1824269  | 4.26 | 1 | 212-237(4.26)                                                                                                   |
| gnl UG Hs#S2140055  | 0.62 | 1 | 233-257(0.62)                                                                                                   |
| gnl UG Hs#S1824322  | 0.91 | 1 | 258-283(0.91)                                                                                                   |
| gnl UG Hs#S2294468  | 1.43 | 3 | 174-200(1.43) 422-447(0.68) 480-506(0.58)                                                                       |
| gnl UG Hs#S3603136  | 1.72 | 1 | 122-147(1.72)                                                                                                   |
| gnl UG Hs#S14272960 | 3.85 | 7 | 1369-1394(3.85) 1416-1441(0.33) 1450-1475(3.45) 1577-1602(1.81) 1638-1663(0.23) 1812-1838(3.65) 2247-2273(0.76) |
| gnl UG Hs#S15631486 | 3.13 | 1 | 1034-1059(3.13)                                                                                                 |
| gnl UG Hs#S5516851  | 5.24 | 2 | 276-301(3.73) 899-924(5.24)                                                                                     |
| gnl UG Hs#S4807749  | 0.57 | 3 | 1301-1326(0.03) 1402-1427(0.57) 1516-1542(0.07)                                                                 |
| gnl UG Hs#S4046151  | 0.62 | 1 | 556-582(0.62)                                                                                                   |
| gnl UG Hs#S1732180  | 2.94 | 7 | 63-85(0.35) 645-670(0.78) 1144-1170(2.72) 1506-1532(0.72) 1477-1502(0.08) 1588-1612(0.43) 1739-1764(2.94)       |
| gnl UG Hs#S1732275  | 0.13 | 1 | 157-182(0.13)                                                                                                   |
| gnl UG Hs#S3546996  | 2.36 | 3 | 10-33(2.36) 120-146(1.50) 356-381(0.50)                                                                         |
| gnl UG Hs#S4807973  | 4.3  | 2 | 96-121(0.36) 876-902(4.30)                                                                                      |
| gnl UG Hs#S4618725  | 2.52 | 3 | 302-327(0.36) 461-485(2.52) 532-557(0.52)                                                                       |
| gnl UG Hs#S6683086  | 0.36 | 2 | 605-630(0.36) 1225-1250(0.26)                                                                                   |
| gnl UG Hs#S14802364 | 1.3  | 3 | 149-177(0.40) 444-469(1.30) 903-928(0.50)                                                                       |
| gnl UG Hs#S1726530  | 1.11 | 1 | 719-744(1.11)                                                                                                   |
| gnl UG Hs#S6693357  | 2.43 | 3 | 166-191(2.20) 1796-1821(2.43) 1874-1900(1.93)                                                                   |
| gnl UG Hs#S3335308  | 0.44 | 1 | 422-448(0.44)                                                                                                   |

|                     |      |    |                 |                                                                                                                                                                             |
|---------------------|------|----|-----------------|-----------------------------------------------------------------------------------------------------------------------------------------------------------------------------|
| gnl UG Hs#S3438768  | 1.49 | 2  | 147-172(0.75)   | 306-332(1.49)                                                                                                                                                               |
| gnl UG Hs#S2293417  | 0.3  | 1  | 948-976(0.30)   |                                                                                                                                                                             |
| gnl UG Hs#S1726793  | 1.98 | 1  | 146-172(1.98)   |                                                                                                                                                                             |
| gnl UG Hs#S3219084  | 0.26 | 1  | 921-947(0.26)   |                                                                                                                                                                             |
| gnl UG Hs#S4620980  | 0.23 | 1  | 921-947(0.23)   |                                                                                                                                                                             |
| gnl UG Hs#S3988042  | 3.78 | 1  | 93-118(3.78)    |                                                                                                                                                                             |
| gnl UG Hs#S11046601 | 1.82 | 1  | 69-94(1.82)     |                                                                                                                                                                             |
| gnl UG Hs#S2332996  | 1.01 | 2  | 543-568(1.01)   | 783-808(0.17)                                                                                                                                                               |
| gnl UG Hs#S2139271  | 2.46 | 10 | 124-152(0.42)   | 296-323(0.20) 462-487(0.04) 569-594(1.85) 596-621(1.37) 1001-1027(0.50) 1037-1062(0.84) 1411-1439(1.40) 1475-1500(2.46) 1987-2012(0.46)                                     |
| gnl UG Hs#S3547267  | 3.11 | 1  | 147-172(3.11)   |                                                                                                                                                                             |
| gnl UG Hs#S1727324  | 0.07 | 1  | 733-757(0.07)   |                                                                                                                                                                             |
| gnl UG Hs#S7110720  | 0.84 | 1  | 878-904(0.84)   |                                                                                                                                                                             |
| gnl UG Hs#S3547233  | 0.07 | 1  | 84-109(0.07)    |                                                                                                                                                                             |
| gnl UG Hs#S4824971  | 3.15 | 3  | 90-116(2.59)    | 119-147(0.15) 223-248(3.15)                                                                                                                                                 |
| gnl UG Hs#S11046683 | 4.82 | 6  | 709-734(4.82)   | 831-857(0.23) 915-942(0.45) 952-980(3.13) 1474-1499(2.80) 2552-2577(1.13)                                                                                                   |
| gnl UG Hs#S3218893  | 0.57 | 1  | 265-290(0.57)   |                                                                                                                                                                             |
| gnl UG Hs#S4807529  | 3.88 | 2  | 45-68(2.75)     | 251-274(3.88)                                                                                                                                                               |
| gnl UG Hs#S1727626  | 0.98 | 2  | 155-180(0.76)   | 237-263(0.98)                                                                                                                                                               |
| gnl UG Hs#S2139418  | 0.66 | 1  | 2795-2820(0.66) |                                                                                                                                                                             |
| gnl UG Hs#S11046743 | 1.81 | 3  | 1126-1150(0.97) | 1349-1374(1.81) 1639-1665(0.52)                                                                                                                                             |
| gnl UG Hs#S1729078  | 1.03 | 1  | 64-89(1.03)     |                                                                                                                                                                             |
| gnl UG Hs#S4807544  | 0.94 | 2  | 1162-1188(0.94) | 1834-1859(0.66)                                                                                                                                                             |
| gnl UG Hs#S3219926  | 2.62 | 6  | 306-331(1.72)   | 613-639(0.69) 646-669(0.08) 880-905(2.62) 1032-1058(1.50) 1074-1102(1.97)                                                                                                   |
| gnl UG Hs#S2139018  | 0.34 | 1  | 1595-1622(0.34) |                                                                                                                                                                             |
| gnl UG Hs#S3438843  | 0.95 | 4  | 1021-1047(0.27) | 1080-1105(0.39) 1558-1584(0.95) 2063-2088(0.68)                                                                                                                             |
| gnl UG Hs#S14812986 | 5.46 | 6  | 625-650(5.46)   | 958-983(3.89) 998-1021(2.31) 1034-1060(3.04) 1258-1283(0.30) 1309-1336(0.86)                                                                                                |
| gnl UG Hs#S1727223  | 2.46 | 1  | 667-692(2.46)   |                                                                                                                                                                             |
| gnl UG Hs#S3322125  | 0.04 | 1  | 615-640(0.04)   |                                                                                                                                                                             |
| gnl UG Hs#S1729263  | 1.08 | 2  | 221-247(1.08)   | 367-393(0.40)                                                                                                                                                               |
| gnl UG Hs#S4811521  | 0.21 | 1  | 311-337(0.21)   |                                                                                                                                                                             |
| gnl UG Hs#S3438691  | 0.72 | 1  | 257-285(0.72)   |                                                                                                                                                                             |
| gnl UG Hs#S2138854  | 3.11 | 4  | 98-126(0.71)    | 539-565(3.11) 626-654(1.47) 1395-1420(1.46)                                                                                                                                 |
| gnl UG Hs#S1728085  | 0.4  | 1  | 992-1017(0.40)  |                                                                                                                                                                             |
| gnl UG Hs#S4831044  | 5.3  | 7  | 381-409(5.30)   | 486-511(0.55) 1309-1334(0.32) 2977-3002(0.03) 3265-3289(1.90) 3878-3903(0.17) 3968-3993(1.75)                                                                               |
| gnl UG Hs#S2139053  | 4.66 | 2  | 17-45(4.66)     | 2627-2652(0.30)                                                                                                                                                             |
| gnl UG Hs#S1728592  | 2.36 | 2  | 419-445(2.34)   | 821-847(2.36)                                                                                                                                                               |
| gnl UG Hs#S3542723  | 0.3  | 1  | 347-372(0.30)   |                                                                                                                                                                             |
| gnl UG Hs#S14802254 | 3.31 | 1  | 4327-4353(3.31) |                                                                                                                                                                             |
| gnl UG Hs#S1824449  | 1.26 | 2  | 172-198(0.04)   | 364-389(1.26)                                                                                                                                                               |
| gnl UG Hs#S2139637  | 3.3  | 7  | 34-59(0.40)     | 319-344(3.11) 464-492(2.85) 702-730(2.07) 976-1001(0.62) 2492-2516(0.05) 2601-2626(3.30)                                                                                    |
| gnl UG Hs#S2139338  | 0.49 | 3  | 726-751(0.15)   | 1541-1566(0.20) 1847-1872(0.49)                                                                                                                                             |
| gnl UG Hs#S1971616  | 5.19 | 3  | 1905-1930(0.65) | 2173-2198(5.19) 2216-2240(0.40)                                                                                                                                             |
| gnl UG Hs#S1729042  | 0.42 | 1  | 709-731(0.42)   |                                                                                                                                                                             |
| gnl UG Hs#S3218917  | 5.23 | 16 | 89-114(0.91)    | 257-282(0.98) 854-879(0.05) 1335-1363(1.25) 1904-1929(1.57) 2299-2326(1.24) 2911-2938(1.98) 3952-3977(0.40) 4049-4075(1.43) 4585-4610(2.72) 4832-4861(0.39) 4899-4927(1.47) |
| gnl UG Hs#S3219858  | 1.39 | 1  | 380-405(1.39)   |                                                                                                                                                                             |
| gnl UG Hs#S2294061  | 0.68 | 1  | 2551-2576(0.68) |                                                                                                                                                                             |
| gnl UG Hs#S1729049  | 4.36 | 7  | 1864-1892(1.71) | 1894-1919(0.69) 2082-2107(0.72) 2249-2277(0.24) 2883-2909(0.36) 2971-2999(0.07) 3042-3067(4.36)                                                                             |
| gnl UG Hs#S14272716 | 1.23 | 3  | 154-179(1.23)   | 629-654(0.14) 819-842(0.50)                                                                                                                                                 |
| gnl UG Hs#S4621237  | 0.3  | 1  | 105-130(0.30)   |                                                                                                                                                                             |
| gnl UG Hs#S2294201  | 6.18 | 1  | 1899-1925(6.18) |                                                                                                                                                                             |
| gnl UG Hs#S4546306  | 1.18 | 1  | 708-733(1.18)   |                                                                                                                                                                             |
| gnl UG Hs#S7105127  | 2.5  | 1  | 492-517(2.50)   |                                                                                                                                                                             |
| gnl UG Hs#S15641167 | 5.21 | 3  | 1332-1358(3.82) | 1359-1384(5.21) 1554-1578(1.32)                                                                                                                                             |
| gnl UG Hs#S15633294 | 0.12 | 1  | 490-516(0.12)   |                                                                                                                                                                             |

|                     |      |    |                                                                                                                                                                               |
|---------------------|------|----|-------------------------------------------------------------------------------------------------------------------------------------------------------------------------------|
| gnl UG Hs#S10832589 | 2.5  | 4  | 602-627(1.06) 709-734(2.43) 1540-1565(2.50) 2007-2032(1.33)                                                                                                                   |
| gnl UG Hs#S1729108  | 0.79 | 1  | 21-47(0.79)                                                                                                                                                                   |
| gnl UG Hs#S1730390  | 0.72 | 4  | 1384-1412(0.17) 1718-1743(0.72) 1793-1817(0.04) 2360-2388(0.49)                                                                                                               |
| gnl UG Hs#S11590921 | 1.98 | 2  | 1555-1580(1.98) 2334-2359(1.30)                                                                                                                                               |
| gnl UG Hs#S2139640  | 2.56 | 6  | 138-164(0.46) 197-222(0.98) 303-329(1.50) 645-672(0.52) 1397-1423(2.56) 3157-3182(1.58)                                                                                       |
| gnl UG Hs#S1727399  | 5.03 | 5  | 241-266(0.56) 364-389(1.50) 1165-1190(5.03) 1469-1495(2.65) 1512-1538(1.58)                                                                                                   |
| gnl UG Hs#S3322094  | 2.08 | 2  | 781-806(0.98) 978-1004(2.08)                                                                                                                                                  |
| gnl UG Hs#S3219208  | 0.7  | 2  | 1768-1793(0.24) 2051-2077(0.70)                                                                                                                                               |
| gnl UG Hs#S1728885  | 2.49 | 2  | 86-114(2.49) 588-614(0.57)                                                                                                                                                    |
| gnl UG Hs#S1728948  | 5    | 4  | 78-103(0.23) 182-207(2.98) 212-237(5.00) 889-917(0.85)                                                                                                                        |
| gnl UG Hs#S7110802  | 0.56 | 1  | 959-985(0.56)                                                                                                                                                                 |
| gnl UG Hs#S3603170  | 0.33 | 1  | 136-162(0.33)                                                                                                                                                                 |
| gnl UG Hs#S1729639  | 1.4  | 2  | 60-86(1.40) 959-987(1.40)                                                                                                                                                     |
| gnl UG Hs#S4392125  | 3.19 | 6  | 29-54(3.19) 294-318(0.08) 353-378(2.45) 511-539(0.62) 642-667(0.69) 729-754(0.57)                                                                                             |
| gnl UG Hs#S1731237  | 2.08 | 1  | 1946-1972(2.08)                                                                                                                                                               |
| gnl UG Hs#S1726351  | 0.56 | 2  | 401-427(0.56) 1083-1111(0.01)                                                                                                                                                 |
| gnl UG Hs#S4828261  | 2.46 | 2  | 105-130(2.46) 399-427(0.42)                                                                                                                                                   |
| gnl UG Hs#S5516717  | 0.23 | 1  | 211-237(0.23)                                                                                                                                                                 |
| gnl UG Hs#S1728486  | 1.91 | 7  | 256-281(0.04) 452-477(0.14) 1433-1458(1.40) 1535-1560(1.91) 1567-1592(0.19) 1596-1621(1.68) 2525-2550(0.53)                                                                   |
| gnl UG Hs#S1727372  | 0.88 | 1  | 926-954(0.88)                                                                                                                                                                 |
| gnl UG Hs#S1731374  | 0.88 | 2  | 30-56(0.88) 637-662(0.08)                                                                                                                                                     |
| gnl UG Hs#S2139720  | 0.71 | 2  | 98-123(0.43) 162-191(0.71)                                                                                                                                                    |
| gnl UG Hs#S15631494 | 0.68 | 2  | 439-464(0.68) 1574-1600(0.23)                                                                                                                                                 |
| gnl UG Hs#S3218889  | 4.94 | 11 | 936-964(3.23) 1005-1030(1.36) 1245-1270(4.94) 2339-2364(1.07) 2426-2454(0.64) 2501-2526(0.26) 5076-5103(1.66) 6303-6328(1.46) 6505-6528(1.97) 6694-6719(1.17) 6944-6969(2.72) |
| gnl UG Hs#S4553838  | 0.46 | 1  | 578-605(0.46)                                                                                                                                                                 |
| gnl UG Hs#S14802304 | 1.52 | 4  | 85-106(0.66) 288-316(0.42) 384-409(1.52) 917-942(0.50)                                                                                                                        |
| gnl UG Hs#S2293632  | 1.82 | 3  | 364-388(1.82) 1005-1030(0.74) 1415-1443(0.30)                                                                                                                                 |
| gnl UG Hs#S1728026  | 4.17 | 5  | 231-256(3.23) 1014-1039(4.17) 1136-1161(0.32) 1444-1469(1.53) 1838-1864(0.17)                                                                                                 |
| gnl UG Hs#S2138845  | 2.57 | 1  | 202-227(2.57)                                                                                                                                                                 |
| gnl UG Hs#S10832604 | 4.13 | 2  | 562-588(0.07) 664-689(4.13)                                                                                                                                                   |
| gnl UG Hs#S2140565  | 0.13 | 1  | 1349-1374(0.13)                                                                                                                                                               |
| gnl UG Hs#S3940082  | 0.33 | 2  | 634-658(0.33) 686-714(0.01)                                                                                                                                                   |
| gnl UG Hs#S4810123  | 3.07 | 2  | 289-314(3.07) 505-530(0.43)                                                                                                                                                   |
| gnl UG Hs#S3438636  | 0.3  | 1  | 480-505(0.30)                                                                                                                                                                 |
| gnl UG Hs#S2294372  | 0.23 | 1  | 97-122(0.23)                                                                                                                                                                  |
| gnl UG Hs#S2293923  | 0.44 | 2  | 334-361(0.44) 909-934(0.07)                                                                                                                                                   |
| gnl UG Hs#S6159047  | 2.72 | 1  | 392-416(2.72)                                                                                                                                                                 |
| gnl UG Hs#S4816548  | 1.07 | 1  | 141-169(1.07)                                                                                                                                                                 |
| gnl UG Hs#S1731444  | 0.2  | 1  | 489-514(0.20)                                                                                                                                                                 |
| gnl UG Hs#S4820533  | 3.4  | 1  | 670-696(3.40)                                                                                                                                                                 |
| gnl UG Hs#S1727880  | 1.24 | 1  | 742-768(1.24)                                                                                                                                                                 |
| gnl UG Hs#S4829134  | 2.9  | 4  | 273-299(1.56) 1519-1544(2.90) 1593-1618(1.30) 1693-1719(0.36)                                                                                                                 |
| gnl UG Hs#S2293771  | 5.11 | 4  | 182-207(5.11) 389-414(2.75) 905-930(0.07) 960-985(4.89)                                                                                                                       |
| gnl UG Hs#S2140474  | 4.53 | 11 | 101-126(0.33) 270-294(0.58) 604-629(0.75) 891-916(1.15) 1337-1364(0.49) 1435-1461(0.52) 1482-1511(0.21) 1711-1739(1.33) 1991-2016(0.50) 2049-2074(4.53) 2180-2205(2.11)       |
| gnl UG Hs#S1730399  | 2.82 | 2  | 644-670(2.82) 766-793(0.37)                                                                                                                                                   |
| gnl UG Hs#S2138725  | 1.34 | 2  | 75-100(1.26) 204-230(1.34)                                                                                                                                                    |
| gnl UG Hs#S4816155  | 0.44 | 1  | 164-190(0.44)                                                                                                                                                                 |
| gnl UG Hs#S1972932  | 1.52 | 2  | 1050-1076(1.52) 1796-1822(1.07)                                                                                                                                               |
| gnl UG Hs#S4546033  | 0.94 | 1  | 259-287(0.94)                                                                                                                                                                 |
| gnl UG Hs#S4002128  | 1.4  | 1  | 322-347(1.40)                                                                                                                                                                 |
| gnl UG Hs#S1728515  | 3.84 | 3  | 140-166(3.04) 198-225(3.84) 453-479(1.27)                                                                                                                                     |
| gnl UG Hs#S3547243  | 2.46 | 7  | 159-184(2.46) 454-479(1.17) 1574-1600(0.91) 1901-1927(1.79) 2246-2271(0.20) 2318-2344(1.81) 2472-2498(1.23)                                                                   |
| gnl UG Hs#S2139301  | 2.13 | 2  | 55-80(2.13) 503-528(0.62)                                                                                                                                                     |
| gnl UG Hs#S2139191  | 2.98 | 3  | 153-181(2.98) 205-231(1.01) 249-275(2.30)                                                                                                                                     |



|                     |      |   |                                                                                             |
|---------------------|------|---|---------------------------------------------------------------------------------------------|
| gnl UG Hs#S4820209  | 1.72 | 4 | 544-569(0.94) 615-643(0.08) 897-922(0.68) 1751-1776(1.72)                                   |
| gnl UG Hs#S1728139  | 0.36 | 2 | 132-157(0.36) 406-435(0.09)                                                                 |
| gnl UG Hs#S4815004  | 2.98 | 2 | 614-639(2.98) 1537-1562(0.09)                                                               |
| gnl UG Hs#S1730307  | 3.47 | 3 | 120-147(3.47) 650-676(2.62) 906-931(2.36)                                                   |
| gnl UG Hs#S1727645  | 0.97 | 3 | 556-581(0.57) 1156-1184(0.97) 1284-1310(0.23)                                               |
| gnl UG Hs#S4814706  | 1.53 | 2 | 459-484(1.53) 492-517(0.25)                                                                 |
| gnl UG Hs#S2139473  | 2.97 | 3 | 483-508(2.72) 995-1024(2.97) 1167-1192(1.11)                                                |
| gnl UG Hs#S3219271  | 3.17 | 3 | 429-452(0.34) 834-859(3.17) 942-967(0.66)                                                   |
| gnl UG Hs#S4812188  | 0.72 | 1 | 211-236(0.72)                                                                               |
| gnl UG Hs#S4621491  | 0.75 | 1 | 405-430(0.75)                                                                               |
| gnl UG Hs#S1730341  | 0.04 | 1 | 712-737(0.04)                                                                               |
| gnl UG Hs#S4631159  | 1.94 | 1 | 483-508(1.94)                                                                               |
| gnl UG Hs#S1726883  | 0.72 | 1 | 158-182(0.72)                                                                               |
| gnl UG Hs#S1726509  | 2.17 | 2 | 125-150(2.04) 241-267(2.17)                                                                 |
| gnl UG Hs#S1728184  | 1.26 | 2 | 480-505(1.26) 564-589(0.65)                                                                 |
| gnl UG Hs#S6158972  | 0.75 | 1 | 433-456(0.75)                                                                               |
| gnl UG Hs#S7112079  | 1.46 | 2 | 502-529(1.46) 809-836(0.86)                                                                 |
| gnl UG Hs#S2293345  | 1.68 | 1 | 712-739(1.68)                                                                               |
| gnl UG Hs#S3601633  | 2.62 | 3 | 15-40(1.24) 827-852(0.98) 1025-1050(2.62)                                                   |
| gnl UG Hs#S1729869  | 0.48 | 1 | 252-277(0.48)                                                                               |
| gnl UG Hs#S4545933  | 0.08 | 1 | 351-379(0.08)                                                                               |
| gnl UG Hs#S11046736 | 3.36 | 2 | 900-925(3.36) 1837-1865(3.20)                                                               |
| gnl UG Hs#S1726838  | 3.11 | 1 | 738-763(3.11)                                                                               |
| gnl UG Hs#S4045150  | 3.21 | 4 | 129-154(0.98) 1260-1284(1.07) 2286-2310(0.80) 3291-3317(3.21)                               |
| gnl UG Hs#S4046358  | 2.8  | 2 | 398-423(2.80) 592-617(2.50)                                                                 |
| gnl UG Hs#S4822618  | 0.35 | 1 | 232-256(0.35)                                                                               |
| gnl UG Hs#S4546130  | 4.24 | 2 | 109-135(0.08) 850-875(4.24)                                                                 |
| gnl UG Hs#S1731649  | 0.59 | 2 | 40-65(0.50) 589-617(0.59)                                                                   |
| gnl UG Hs#S11046544 | 0.67 | 1 | 82-108(0.67)                                                                                |
| gnl UG Hs#S3619572  | 1.46 | 2 | 43-67(1.46) 214-240(0.91)                                                                   |
| gnl UG Hs#S3219959  | 1.97 | 2 | 252-278(1.97) 935-960(0.30)                                                                 |
| gnl UG Hs#S3547230  | 3.25 | 2 | 263-289(0.51) 654-682(3.25)                                                                 |
| gnl UG Hs#S2140176  | 1.74 | 2 | 330-354(1.74) 360-385(0.30)                                                                 |
| gnl UG Hs#S1730255  | 0.43 | 1 | 820-845(0.43)                                                                               |
| gnl UG Hs#S1729110  | 1.62 | 2 | 140-165(0.39) 446-473(1.62)                                                                 |
| gnl UG Hs#S4807815  | 4.62 | 6 | 320-344(1.67) 580-606(1.11) 1112-1140(0.71) 1332-1357(4.62) 1371-1396(0.91) 1458-1483(0.74) |
| gnl UG Hs#S1731584  | 0.82 | 2 | 265-290(0.82) 475-500(0.82)                                                                 |
| gnl UG Hs#S1727480  | 1.4  | 2 | 218-246(1.40) 1076-1101(0.91)                                                               |
| gnl UG Hs#S1730537  | 0.07 | 1 | 294-319(0.07)                                                                               |
| gnl UG Hs#S1729274  | 3.97 | 6 | 137-161(0.42) 378-404(0.89) 532-557(3.97) 811-839(0.49) 1565-1591(0.86) 1866-1894(1.30)     |
| gnl UG Hs#S1727521  | 1.85 | 1 | 131-156(1.85)                                                                               |
| gnl UG Hs#S3219779  | 4.04 | 2 | 69-94(4.04) 169-195(0.46)                                                                   |
| gnl UG Hs#S4435696  | 1.81 | 3 | 789-814(0.02) 847-873(1.81) 982-1010(0.88)                                                  |
| gnl UG Hs#S2140713  | 0.01 | 1 | 1883-1908(0.01)                                                                             |
| gnl UG Hs#S3987166  | 1.89 | 1 | 300-325(1.89)                                                                               |
| gnl UG Hs#S12743749 | 0.57 | 2 | 42-70(0.20) 245-271(0.57)                                                                   |
| gnl UG Hs#S3438519  | 1.53 | 1 | 150-175(1.53)                                                                               |
| gnl UG Hs#S4808845  | 1.8  | 3 | 290-318(1.14) 1524-1549(1.80) 2001-2029(0.14)                                               |
| gnl UG Hs#S1824502  | 0.2  | 1 | 118-143(0.20)                                                                               |
| gnl UG Hs#S1729840  | 1.17 | 1 | 59-84(1.17)                                                                                 |
| gnl UG Hs#S3438852  | 3.88 | 1 | 642-666(3.88)                                                                               |
| gnl UG Hs#S1729319  | 0.65 | 1 | 381-406(0.65)                                                                               |
| gnl UG Hs#S15636696 | 0.08 | 1 | 72-100(0.08)                                                                                |
| gnl UG Hs#S14802454 | 0.91 | 5 | 670-695(0.23) 802-830(0.56) 1576-1604(0.01) 1655-1683(0.46) 1735-1760(0.91)                 |

|                     |      |                                                                                                           |
|---------------------|------|-----------------------------------------------------------------------------------------------------------|
| gnl UG Hs#S1729668  | 1.98 | 7 172-197(1.98) 198-224(1.72) 336-364(1.35) 496-521(0.60) 856-884(0.59) 1192-1217(0.21) 1427-1453(0.36)   |
| gnl UG Hs#S1732161  | 2.11 | 1 264-289(2.11)                                                                                           |
| gnl UG Hs#S7111354  | 1.87 | 2 1052-1076(1.87) 1302-1329(0.11)                                                                         |
| gnl UG Hs#S5495008  | 2.01 | 2 222-248(2.01) 541-569(1.95)                                                                             |
| gnl UG Hs#S3619535  | 1.67 | 5 245-271(1.67) 966-991(0.90) 995-1020(1.46) 1366-1393(0.43) 1567-1592(0.48)                              |
| gnl UG Hs#S4807758  | 0.04 | 1 147-172(0.04)                                                                                           |
| gnl UG Hs#S3905477  | 3.36 | 2 1265-1291(3.36) 1603-1628(0.58)                                                                         |
| gnl UG Hs#S1730920  | 4.79 | 1 44-72(4.79)                                                                                             |
| gnl UG Hs#S3440087  | 2.45 | 5 30-55(1.89) 144-168(0.03) 201-227(0.69) 427-449(1.26) 656-682(2.45)                                     |
| gnl UG Hs#S3219797  | 3.11 | 7 267-293(1.69) 649-674(0.94) 689-714(2.94) 846-870(0.19) 1394-1420(0.27) 1607-1632(0.62) 1650-1676(3.11) |
| gnl UG Hs#S1730386  | 1.39 | 1 1004-1031(1.39)                                                                                         |
| gnl UG Hs#S4815100  | 0.38 | 1 310-335(0.38)                                                                                           |
| gnl UG Hs#S1729102  | 1.18 | 2 94-122(1.18) 735-760(0.14)                                                                              |
| gnl UG Hs#S2139797  | 2.23 | 1 65-90(2.23)                                                                                             |
| gnl UG Hs#S4046013  | 2.3  | 5 21-46(1.24) 89-114(0.78) 244-270(1.01) 341-367(2.30) 642-667(1.35)                                      |
| gnl UG Hs#S1731853  | 0.04 | 1 650-678(0.04)                                                                                           |
| gnl UG Hs#S4807536  | 1.56 | 1 457-482(1.56)                                                                                           |
| gnl UG Hs#S2139523  | 3.43 | 6 957-982(0.40) 2001-2026(1.86) 2459-2484(3.43) 2535-2561(0.40) 3053-3078(1.50) 3369-3394(2.57)           |
| gnl UG Hs#S1727363  | 3.4  | 2 814-842(0.23) 1274-1300(3.40)                                                                           |
| gnl UG Hs#S4821664  | 4.04 | 4 271-295(0.19) 350-376(0.91) 377-405(0.94) 866-891(4.04)                                                 |
| gnl UG Hs#S4814875  | 0.04 | 1 30-56(0.04)                                                                                             |
| gnl UG Hs#S1731032  | 3.3  | 1 496-522(3.30)                                                                                           |
| gnl UG Hs#S892219   | 4.55 | 5 1016-1042(0.50) 1402-1428(0.37) 3933-3960(3.97) 4020-4045(4.55) 4795-4820(2.17)                         |
| gnl UG Hs#S2139158  | 1.21 | 1 333-358(1.21)                                                                                           |
| gnl UG Hs#S1728165  | 0.58 | 1 66-91(0.58)                                                                                             |
| gnl UG Hs#S4621109  | 3.36 | 6 453-479(1.30) 483-508(3.36) 544-572(1.52) 672-698(2.21) 1115-1140(0.66) 1597-1623(1.21)                 |
| gnl UG Hs#S2140083  | 0.62 | 2 570-593(0.40) 609-635(0.62)                                                                             |
| gnl UG Hs#S2139339  | 0.14 | 1 350-376(0.14)                                                                                           |
| gnl UG Hs#S5978446  | 2.82 | 4 669-697(1.07) 750-775(2.82) 791-816(2.15) 1009-1034(0.58)                                               |
| gnl UG Hs#S4807805  | 0.62 | 2 880-905(0.46) 1036-1061(0.62)                                                                           |
| gnl UG Hs#S4620500  | 2.86 | 6 151-179(0.40) 477-504(2.86) 656-682(0.17) 1529-1552(0.40) 1575-1602(0.57) 1617-1643(1.30)               |
| gnl UG Hs#S15631634 | 1.79 | 1 559-583(1.79)                                                                                           |
| gnl UG Hs#S4825997  | 4.91 | 3 501-526(0.08) 1805-1831(4.91) 1881-1907(0.49)                                                           |
| gnl UG Hs#S1729052  | 0.17 | 2 132-157(0.17) 444-470(0.08)                                                                             |
| gnl UG Hs#S2138764  | 1.88 | 3 836-864(1.88) 1108-1136(0.27) 1635-1660(0.05)                                                           |
| gnl UG Hs#S1727654  | 0.81 | 1 1193-1221(0.81)                                                                                         |
| gnl UG Hs#S2293220  | 0.2  | 1 1075-1100(0.20)                                                                                         |
| gnl UG Hs#S3219449  | 3.63 | 1 2480-2505(3.63)                                                                                         |
| gnl UG Hs#S3218963  | 0.3  | 1 293-316(0.30)                                                                                           |
| gnl UG Hs#S2293731  | 0.17 | 1 620-646(0.17)                                                                                           |
| gnl UG Hs#S15730329 | 0.79 | 1 732-757(0.79)                                                                                           |
| gnl UG Hs#S2293927  | 3.57 | 2 601-626(3.57) 675-699(1.47)                                                                             |
| gnl UG Hs#S2139084  | 2.94 | 6 42-68(2.94) 117-142(1.14) 314-340(2.30) 347-373(0.37) 620-645(1.53) 646-671(1.56)                       |
| gnl UG Hs#S4813218  | 0.57 | 1 163-186(0.57)                                                                                           |
| gnl UG Hs#S6163385  | 1.07 | 2 154-182(1.07) 516-543(0.82)                                                                             |
| gnl UG Hs#S4631305  | 3.79 | 2 156-181(1.98) 264-289(3.79)                                                                             |
| gnl UG Hs#S10832339 | 0.72 | 1 512-537(0.72)                                                                                           |
| gnl UG Hs#S1728548  | 2.43 | 1 142-166(2.43)                                                                                           |
| gnl UG Hs#S4807966  | 1.56 | 1 1339-1364(1.56)                                                                                         |
| gnl UG Hs#S1727812  | 2.56 | 3 1775-1800(0.30) 3203-3228(1.63) 5231-5256(2.56)                                                         |
| gnl UG Hs#S3219782  | 2.91 | 6 592-618(1.46) 913-938(0.82) 1090-1115(2.91) 1670-1695(0.46) 1704-1729(1.81) 2035-2060(1.30)             |
| gnl UG Hs#S1732171  | 3.5  | 1 585-613(3.50)                                                                                           |
| gnl UG Hs#S7112377  | 0.59 | 2 158-183(0.33) 562-587(0.59)                                                                             |
| gnl UG Hs#S1726692  | 1.82 | 2 650-675(1.82) 1049-1078(0.78)                                                                           |

|                     |      |                                                                                                                                                                                              |
|---------------------|------|----------------------------------------------------------------------------------------------------------------------------------------------------------------------------------------------|
| gnl UG Hs#S2293257  | 0.33 | 1 226-254(0.33)                                                                                                                                                                              |
| gnl UG Hs#S15633552 | 3.04 | 3 467-493(3.04) 512-538(0.72) 1499-1523(0.67)                                                                                                                                                |
| gnl UG Hs#S3880629  | 5.16 | 13 149-175(2.50) 584-609(0.84) 647-672(5.16) 1138-1164(2.56) 1283-1307(2.65) 1570-1595(0.46) 2242-2267(0.52) 2743-2768(2.49) 2801-2829(1.30) 2927-2955(0.40) 4210-4234(0.87) 4278-4303(0.3)  |
| gnl UG Hs#S2140227  | 0.45 | 1 15-43(0.45)                                                                                                                                                                                |
| gnl UG Hs#S4810907  | 0.66 | 1 743-769(0.66)                                                                                                                                                                              |
| gnl UG Hs#S5860333  | 1.4  | 2 774-799(0.13) 1274-1301(1.40)                                                                                                                                                              |
| gnl UG Hs#S15640017 | 2.46 | 2 386-412(2.46) 501-526(1.07)                                                                                                                                                                |
| gnl UG Hs#S4046182  | 4.53 | 8 789-815(1.10) 1181-1206(3.26) 2628-2653(1.53) 2790-2815(1.59) 3096-3122(2.65) 3125-3150(0.17) 3268-3296(1.16) 3603-3629(4.53)                                                              |
| gnl UG Hs#S1731127  | 3.62 | 2 40-66(0.75) 671-697(3.62)                                                                                                                                                                  |
| gnl UG Hs#S3619291  | 3.06 | 3 1121-1147(3.06) 2112-2140(0.14) 2653-2679(0.36)                                                                                                                                            |
| gnl UG Hs#S1727004  | 0.07 | 1 832-857(0.07)                                                                                                                                                                              |
| gnl UG Hs#S1729984  | 3.3  | 3 21-47(3.30) 66-94(0.23) 321-349(0.71)                                                                                                                                                      |
| gnl UG Hs#S4621602  | 5.37 | 9 1205-1230(0.79) 1356-1381(1.57) 1414-1439(1.62) 1654-1679(5.37) 1704-1728(2.14) 2147-2173(0.62) 3239-3262(0.37) 3995-4020(3.04) 4346-4371(1.01)                                            |
| gnl UG Hs#S1730722  | 3.94 | 1 719-744(3.94)                                                                                                                                                                              |
| gnl UG Hs#S3619249  | 3.08 | 1 1238-1264(3.08)                                                                                                                                                                            |
| gnl UG Hs#S3220083  | 4.14 | 3 1407-1433(3.17) 2175-2200(4.14) 3459-3487(0.77)                                                                                                                                            |
| gnl UG Hs#S1731800  | 3.46 | 9 97-122(0.20) 245-271(3.46) 801-826(0.94) 844-870(0.30) 952-977(0.46) 1242-1270(1.40) 1338-1361(0.24) 1431-1457(2.33) 1513-1539(2.24)                                                       |
| gnl UG Hs#S7112731  | 5.69 | 1 1325-1350(5.69)                                                                                                                                                                            |
| gnl UG Hs#S4813233  | 1.3  | 1 1198-1223(1.30)                                                                                                                                                                            |
| gnl UG Hs#S1729383  | 1.17 | 2 24-50(1.17) 241-269(0.81)                                                                                                                                                                  |
| gnl UG Hs#S2139141  | 0.85 | 1 578-604(0.85)                                                                                                                                                                              |
| gnl UG Hs#S3603196  | 0.39 | 2 410-435(0.39) 1013-1040(0.25)                                                                                                                                                              |
| gnl UG Hs#S3219653  | 1.72 | 1 106-131(1.72)                                                                                                                                                                              |
| gnl UG Hs#S1730422  | 2.15 | 1 194-219(2.15)                                                                                                                                                                              |
| gnl UG Hs#S4283557  | 2.73 | 1 119-144(2.73)                                                                                                                                                                              |
| gnl UG Hs#S1969083  | 1.19 | 1 2650-2675(1.19)                                                                                                                                                                            |
| gnl UG Hs#S2294325  | 1.18 | 1 367-392(1.18)                                                                                                                                                                              |
| gnl UG Hs#S15632540 | 0.07 | 1 376-401(0.07)                                                                                                                                                                              |
| gnl UG Hs#S1729546  | 1.79 | 1 1227-1254(1.79)                                                                                                                                                                            |
| gnl UG Hs#S5978651  | 1.01 | 1 377-400(1.01)                                                                                                                                                                              |
| gnl UG Hs#S2293488  | 0.46 | 1 484-509(0.46)                                                                                                                                                                              |
| gnl UG Hs#S4823267  | 1.89 | 1 1666-1692(1.89)                                                                                                                                                                            |
| gnl UG Hs#S15636177 | 2.07 | 5 53-78(0.56) 1144-1169(0.17) 1385-1410(1.53) 2250-2275(1.13) 2383-2408(2.07)                                                                                                                |
| gnl UG Hs#S1729378  | 2.87 | 5 37-62(2.87) 238-263(0.46) 312-337(2.79) 742-770(0.61) 836-862(0.23)                                                                                                                        |
| gnl UG Hs#S4617115  | 2.1  | 1 959-988(2.10)                                                                                                                                                                              |
| gnl UG Hs#S3619397  | 2.47 | 1 48-73(2.47)                                                                                                                                                                                |
| gnl UG Hs#S4554571  | 0.13 | 1 186-214(0.13)                                                                                                                                                                              |
| gnl UG Hs#S4631028  | 1.91 | 5 997-1023(1.91) 1091-1117(0.01) 2010-2038(0.56) 2570-2595(1.04) 2611-2639(1.62)                                                                                                             |
| gnl UG Hs#S4807839  | 3.55 | 5 365-390(0.14) 775-800(3.55) 1367-1392(2.26) 1407-1433(2.50) 1563-1589(0.08)                                                                                                                |
| gnl UG Hs#S1731753  | 2.78 | 1 71-99(2.78)                                                                                                                                                                                |
| gnl UG Hs#S15644243 | 1.13 | 1 1077-1102(1.13)                                                                                                                                                                            |
| gnl UG Hs#S3355462  | 2.57 | 5 207-233(0.05) 447-472(0.76) 849-874(0.57) 1068-1093(2.57) 1230-1255(1.85)                                                                                                                  |
| gnl UG Hs#S2139069  | 0.77 | 3 1772-1797(0.77) 2350-2378(0.18) 3325-3350(0.36)                                                                                                                                            |
| gnl UG Hs#S6159076  | 3.26 | 5 252-278(2.30) 518-542(3.26) 769-797(1.21) 897-922(0.08) 1015-1038(0.53)                                                                                                                    |
| gnl UG Hs#S4631018  | 2.4  | 4 706-732(0.88) 841-866(1.23) 1067-1095(0.17) 1459-1485(2.40)                                                                                                                                |
| gnl UG Hs#S2293639  | 2.79 | 3 16-41(2.79) 60-85(1.20) 890-914(2.00)                                                                                                                                                      |
| gnl UG Hs#S1971592  | 2.62 | 8 40-66(0.24) 211-238(0.44) 930-956(2.62) 2112-2137(0.04) 2489-2517(2.59) 2911-2936(2.10) 2940-2965(1.94) 3177-3203(0.01)                                                                    |
| gnl UG Hs#S1728762  | 1.47 | 4 494-519(0.07) 1414-1441(1.47) 1869-1894(0.23) 3219-3247(0.34)                                                                                                                              |
| gnl UG Hs#S3619398  | 1.3  | 2 45-70(1.30) 167-190(0.04)                                                                                                                                                                  |
| gnl UG Hs#S3619163  | 0.46 | 1 1984-2007(0.46)                                                                                                                                                                            |
| gnl UG Hs#S1728976  | 2.75 | 16 330-355(0.79) 384-409(1.72) 475-503(2.08) 514-539(1.17) 1355-1380(1.13) 1516-1541(0.81) 2225-2251(1.10) 2313-2338(2.14) 2618-2643(0.40) 2793-2818(1.21) 2911-2940(0.07) 2970-2995(1.84) : |
| gnl UG Hs#S1728835  | 0.53 | 1 683-708(0.53)                                                                                                                                                                              |
| gnl UG Hs#S4830563  | 2.56 | 2 1214-1239(2.56) 1240-1265(1.17)                                                                                                                                                            |
| gnl UG Hs#S2139432  | 2.84 | 5 1274-1299(0.47) 1421-1446(2.30) 1551-1574(2.84) 3594-3619(1.46) 3743-3768(0.59)                                                                                                            |

|                     |      |   |                                                                                                                                       |
|---------------------|------|---|---------------------------------------------------------------------------------------------------------------------------------------|
| gnl UG Hs#S1726234  | 1.83 | 3 | 402-426(0.73) 647-673(1.65) 683-708(1.83)                                                                                             |
| gnl UG Hs#S1729006  | 4.4  | 1 | 188-213(4.40)                                                                                                                         |
| gnl UG Hs#S3940059  | 3.2  | 3 | 223-248(3.20) 804-829(0.08) 1162-1187(0.26)                                                                                           |
| gnl UG Hs#S1729862  | 0.03 | 1 | 600-628(0.03)                                                                                                                         |
| gnl UG Hs#S3219106  | 6.92 | 4 | 349-377(0.39) 453-481(1.30) 1290-1316(1.04) 1435-1460(6.92)                                                                           |
| gnl UG Hs#S2140382  | 2.98 | 1 | 251-277(2.98)                                                                                                                         |
| gnl UG Hs#S4396106  | 2.15 | 1 | 256-282(2.15)                                                                                                                         |
| gnl UG Hs#S7110631  | 3.59 | 1 | 332-359(3.59)                                                                                                                         |
| gnl UG Hs#S3547099  | 1.36 | 3 | 966-991(0.04) 1460-1485(1.36) 1849-1874(0.94)                                                                                         |
| gnl UG Hs#S5978450  | 0.98 | 2 | 683-709(0.98) 1046-1072(0.23)                                                                                                         |
| gnl UG Hs#S4545945  | 1.59 | 2 | 202-227(0.46) 690-716(1.59)                                                                                                           |
| gnl UG Hs#S3619260  | 0.68 | 1 | 340-365(0.68)                                                                                                                         |
| gnl UG Hs#S3219981  | 0.9  | 6 | 1328-1354(0.11) 1600-1626(0.23) 1984-2009(0.90) 2750-2775(0.46) 3757-3782(0.08) 4616-4641(0.08)                                       |
| gnl UG Hs#S1727181  | 1.39 | 2 | 476-503(1.39) 1490-1516(0.23)                                                                                                         |
| gnl UG Hs#S4827415  | 5.85 | 2 | 437-462(5.85) 1337-1365(1.34)                                                                                                         |
| gnl UG Hs#S6693352  | 0.98 | 1 | 1919-1944(0.98)                                                                                                                       |
| gnl UG Hs#S14814316 | 1.89 | 2 | 449-475(1.89) 1742-1768(0.11)                                                                                                         |
| gnl UG Hs#S3438594  | 0.07 | 1 | 616-641(0.07)                                                                                                                         |
| gnl UG Hs#S1731487  | 2.5  | 1 | 213-240(2.50)                                                                                                                         |
| gnl UG Hs#S4001854  | 3.3  | 2 | 789-815(0.34) 1185-1210(3.30)                                                                                                         |
| gnl UG Hs#S3619471  | 0.7  | 1 | 542-565(0.70)                                                                                                                         |
| gnl UG Hs#S2138700  | 1.21 | 1 | 160-184(1.21)                                                                                                                         |
| gnl UG Hs#S5931471  | 2.42 | 2 | 68-93(1.17) 267-293(2.42)                                                                                                             |
| gnl UG Hs#S1731735  | 1.97 | 1 | 303-328(1.97)                                                                                                                         |
| gnl UG Hs#S3438610  | 1.46 | 2 | 304-332(0.23) 926-951(1.46)                                                                                                           |
| gnl UG Hs#S4814981  | 5.7  | 2 | 468-496(0.90) 589-614(5.70)                                                                                                           |
| gnl UG Hs#S2293571  | 3.3  | 2 | 17-41(3.30) 141-170(1.43)                                                                                                             |
| gnl UG Hs#S4811875  | 1.58 | 3 | 635-660(1.04) 1056-1081(1.58) 1579-1604(1.52)                                                                                         |
| gnl UG Hs#S4554018  | 1.67 | 3 | 165-191(1.67) 212-235(0.89) 801-826(1.65)                                                                                             |
| gnl UG Hs#S1727321  | 1.55 | 1 | 760-785(1.55)                                                                                                                         |
| gnl UG Hs#S3219081  | 4.14 | 3 | 574-602(1.98) 605-633(4.14) 672-697(0.26)                                                                                             |
| gnl UG Hs#S4620661  | 0.3  | 1 | 619-644(0.30)                                                                                                                         |
| gnl UG Hs#S7111023  | 3.99 | 1 | 322-348(3.99)                                                                                                                         |
| gnl UG Hs#S1731198  | 2.08 | 9 | 67-92(0.62) 242-268(0.52) 800-825(1.17) 923-946(0.17) 1386-1413(0.01) 1754-1780(2.08) 2228-2253(1.40) 2881-2907(0.18) 3317-3342(0.81) |
| gnl UG Hs#S2139379  | 2.33 | 3 | 119-144(2.01) 360-387(0.16) 1474-1498(2.33)                                                                                           |
| gnl UG Hs#S10832355 | 2.5  | 2 | 895-920(2.50) 1056-1083(0.29)                                                                                                         |
| gnl UG Hs#S2293433  | 1.47 | 2 | 1483-1509(0.69) 1533-1556(1.47)                                                                                                       |
| gnl UG Hs#S1824384  | 2.07 | 4 | 78-103(2.07) 162-187(1.26) 1327-1353(0.39) 1497-1522(0.46)                                                                            |
| gnl UG Hs#S4810651  | 2.33 | 1 | 94-119(2.33)                                                                                                                          |
| gnl UG Hs#S3987206  | 1.65 | 4 | 88-113(1.03) 134-160(0.98) 353-378(0.79) 429-456(1.65)                                                                                |
| gnl UG Hs#S3219925  | 2.04 | 1 | 1246-1272(2.04)                                                                                                                       |
| gnl UG Hs#S1729248  | 0.93 | 1 | 12-38(0.93)                                                                                                                           |
| gnl UG Hs#S4813865  | 3.47 | 5 | 1815-1840(3.47) 2557-2582(0.82) 2651-2679(0.07) 3832-3856(0.34) 3879-3904(1.41)                                                       |
| gnl UG Hs#S4828089  | 0.71 | 1 | 268-296(0.71)                                                                                                                         |
| gnl UG Hs#S4822652  | 5.59 | 3 | 894-922(0.49) 1269-1294(1.17) 1491-1519(5.59)                                                                                         |
| gnl UG Hs#S3219327  | 0.2  | 1 | 670-695(0.20)                                                                                                                         |
| gnl UG Hs#S11062823 | 4.17 | 6 | 542-567(4.17) 888-913(1.33) 1547-1572(2.11) 1591-1616(2.48) 2190-2215(0.26) 2354-2382(1.25)                                           |
| gnl UG Hs#S4828142  | 0.08 | 1 | 444-472(0.08)                                                                                                                         |
| gnl UG Hs#S1726938  | 1.89 | 3 | 1861-1886(1.89) 1920-1944(0.13) 2912-2937(1.11)                                                                                       |
| gnl UG Hs#S1729632  | 5.36 | 1 | 482-507(5.36)                                                                                                                         |
| gnl UG Hs#S15632495 | 2.89 | 5 | 1033-1058(0.84) 1264-1289(0.79) 2089-2117(1.62) 2131-2157(2.89) 2352-2377(0.76)                                                       |
| gnl UG Hs#S4820766  | 5.72 | 2 | 393-421(5.72) 638-663(3.26)                                                                                                           |
| gnl UG Hs#S2139046  | 1.98 | 1 | 697-722(1.98)                                                                                                                         |
| gnl UG Hs#S3438959  | 2.3  | 1 | 272-299(2.30)                                                                                                                         |

|                     |      |   |                 |                 |                 |                 |                 |
|---------------------|------|---|-----------------|-----------------|-----------------|-----------------|-----------------|
| gnl UG Hs#S1732232  | 2.36 | 5 | 470-495(0.13)   | 1022-1046(0.43) | 1092-1120(0.52) | 1221-1246(1.82) | 1304-1332(2.36) |
| gnl UG Hs#S2294279  | 1.75 | 4 | 151-177(1.75)   | 710-735(0.94)   | 777-802(0.23)   | 857-880(1.44)   |                 |
| gnl UG Hs#S3438340  | 1.08 | 2 | 253-281(0.88)   | 375-400(1.08)   |                 |                 |                 |
| gnl UG Hs#S1729947  | 1.65 | 3 | 722-747(1.65)   | 941-967(0.57)   | 1581-1606(1.63) |                 |                 |
| gnl UG Hs#S3439060  | 0.86 | 1 | 830-856(0.86)   |                 |                 |                 |                 |
| gnl UG Hs#S4811971  | 3.52 | 1 | 3672-3697(3.52) |                 |                 |                 |                 |
| gnl UG Hs#S4816081  | 3.79 | 2 | 410-435(0.46)   | 436-462(3.79)   |                 |                 |                 |
| gnl UG Hs#S1726274  | 0.11 | 1 | 185-211(0.11)   |                 |                 |                 |                 |
| gnl UG Hs#S1729826  | 0.17 | 1 | 133-158(0.17)   |                 |                 |                 |                 |
| gnl UG Hs#S1971543  | 2.2  | 2 | 59-83(0.55)     | 295-320(2.20)   |                 |                 |                 |
| gnl UG Hs#S4824154  | 1.94 | 4 | 2650-2675(0.89) | 2916-2941(0.65) | 4214-4242(1.94) | 4251-4276(0.17) |                 |
| gnl UG Hs#S4283442  | 3.04 | 4 | 90-116(0.56)    | 368-395(3.04)   | 1393-1416(2.12) | 1457-1482(1.08) |                 |
| gnl UG Hs#S4825904  | 0.59 | 3 | 306-329(0.59)   | 584-609(0.24)   | 863-889(0.53)   |                 |                 |
| gnl UG Hs#S10831572 | 1.24 | 2 | 488-513(1.24)   | 514-539(1.17)   |                 |                 |                 |
| gnl UG Hs#S1732362  | 3.56 | 7 | 76-101(0.08)    | 174-199(0.58)   | 642-665(3.56)   | 784-810(0.50)   | 878-901(0.08)   |
| gnl UG Hs#S1730956  | 0.4  | 1 | 811-837(0.40)   |                 |                 |                 |                 |
| gnl UG Hs#S3814674  | 0.13 | 1 | 107-136(0.13)   |                 |                 |                 |                 |
| gnl UG Hs#S3603822  | 0.43 | 1 | 397-423(0.43)   |                 |                 |                 |                 |
| gnl UG Hs#S15631453 | 0.94 | 1 | 25-53(0.94)     |                 |                 |                 |                 |
| gnl UG Hs#S4554291  | 0.09 | 1 | 338-364(0.09)   |                 |                 |                 |                 |
| gnl UG Hs#S1729571  | 3    | 1 | 419-444(3.00)   |                 |                 |                 |                 |
| gnl UG Hs#S3219809  | 0.8  | 2 | 79-104(0.69)    | 569-592(0.80)   |                 |                 |                 |
| gnl UG Hs#S2294563  | 2.13 | 1 | 343-369(2.13)   |                 |                 |                 |                 |
| gnl UG Hs#S1728699  | 0.65 | 1 | 548-573(0.65)   |                 |                 |                 |                 |
| gnl UG Hs#S1731454  | 0.91 | 1 | 520-545(0.91)   |                 |                 |                 |                 |
| gnl UG Hs#S4045914  | 0.69 | 5 | 185-210(0.48)   | 292-317(0.21)   | 349-375(0.69)   | 566-591(0.23)   | 672-700(0.40)   |
| gnl UG Hs#S2140136  | 0.97 | 4 | 350-375(0.45)   | 574-599(0.04)   | 1165-1190(0.97) | 1437-1462(0.14) |                 |
| gnl UG Hs#S1732358  | 2.07 | 2 | 586-612(1.01)   | 830-855(2.07)   |                 |                 |                 |
| gnl UG Hs#S4621423  | 1.4  | 2 | 2150-2175(1.40) | 2787-2813(0.07) |                 |                 |                 |
| gnl UG Hs#S1726909  | 0.5  | 1 | 260-286(0.50)   |                 |                 |                 |                 |
| gnl UG Hs#S2651833  | 3.74 | 5 | 97-123(0.75)    | 1177-1202(2.72) | 1891-1916(3.74) | 2354-2380(0.01) | 3151-3178(0.91) |
| gnl UG Hs#S2294619  | 3.15 | 4 | 757-782(3.15)   | 1328-1353(1.66) | 1390-1415(2.45) | 1509-1536(1.20) |                 |
| gnl UG Hs#S3438855  | 0.04 | 1 | 834-859(0.04)   |                 |                 |                 |                 |
| gnl UG Hs#S2140453  | 1.85 | 2 | 735-760(0.26)   | 920-946(1.85)   |                 |                 |                 |
| gnl UG Hs#S1730734  | 0.81 | 1 | 850-879(0.81)   |                 |                 |                 |                 |
| gnl UG Hs#S1728399  | 3.57 | 3 | 56-84(0.55)     | 343-368(1.75)   | 503-528(3.57)   |                 |                 |
| gnl UG Hs#S5978607  | 0.98 | 1 | 182-207(0.98)   |                 |                 |                 |                 |
| gnl UG Hs#S15634791 | 0.11 | 1 | 152-177(0.11)   |                 |                 |                 |                 |
| gnl UG Hs#S14802437 | 2.3  | 2 | 120-146(2.30)   | 192-217(1.72)   |                 |                 |                 |
| gnl UG Hs#S4619717  | 3.55 | 2 | 182-205(0.26)   | 974-1000(3.55)  |                 |                 |                 |
| gnl UG Hs#S2140242  | 1.58 | 1 | 274-299(1.58)   |                 |                 |                 |                 |
| gnl UG Hs#S3219963  | 8.05 | 4 | 635-660(1.98)   | 932-957(1.52)   | 1086-1112(8.05) | 1440-1465(2.05) |                 |
| gnl UG Hs#S2329530  | 0.79 | 1 | 929-954(0.79)   |                 |                 |                 |                 |
| gnl UG Hs#S4815751  | 1.92 | 5 | 8-36(0.90)      | 333-360(0.98)   | 1801-1826(1.70) | 2631-2656(0.72) | 2795-2822(1.92) |
| gnl UG Hs#S4825415  | 1.52 | 2 | 768-793(0.79)   | 798-825(1.52)   |                 |                 |                 |
| gnl UG Hs#S4612633  | 3.72 | 9 | 327-350(1.72)   | 380-406(0.27)   | 786-811(0.72)   | 825-851(2.01)   | 951-978(2.01)   |
| gnl UG Hs#S1729453  | 4.16 | 3 | 151-179(0.35)   | 361-386(1.05)   | 635-660(4.16)   |                 |                 |
| gnl UG Hs#S1726319  | 2.76 | 1 | 1881-1907(2.76) |                 |                 |                 |                 |
| gnl UG Hs#S1731870  | 0.91 | 2 | 72-98(0.32)     | 120-145(0.91)   |                 |                 |                 |
| gnl UG Hs#S4631290  | 1.97 | 1 | 308-334(1.97)   |                 |                 |                 |                 |
| gnl UG Hs#S1729191  | 1.17 | 3 | 1289-1314(0.39) | 1327-1355(1.08) | 1421-1446(1.17) |                 |                 |
| gnl UG Hs#S1729763  | 3.2  | 1 | 108-135(3.20)   |                 |                 |                 |                 |
| gnl UG Hs#S1263784  | 2.97 | 3 | 141-166(1.46)   | 373-396(2.97)   | 1059-1085(0.34) |                 |                 |
| gnl UG Hs#S15642708 | 1.94 | 3 | 569-595(0.08)   | 654-679(1.94)   | 1319-1344(1.72) |                 |                 |

|                     |      |                                                                                                                                               |
|---------------------|------|-----------------------------------------------------------------------------------------------------------------------------------------------|
| gnl UG Hs#S3219284  | 2.75 | 1 115-140(2.75)                                                                                                                               |
| gnl UG Hs#S1729230  | 0.4  | 1 724-749(0.40)                                                                                                                               |
| gnl UG Hs#S14273451 | 2.61 | 1 314-338(2.61)                                                                                                                               |
| gnl UG Hs#S1727052  | 0.14 | 2 1052-1077(0.14) 1160-1185(0.08)                                                                                                             |
| gnl UG Hs#S3993472  | 1.98 | 1 708-733(1.98)                                                                                                                               |
| gnl UG Hs#S7111019  | 2.37 | 5 499-527(0.56) 803-828(1.34) 1143-1168(2.37) 1203-1228(0.14) 1229-1254(0.46)                                                                 |
| gnl UG Hs#S2139599  | 0.07 | 1 965-992(0.07)                                                                                                                               |
| gnl UG Hs#S1730929  | 2.09 | 3 219-243(0.66) 549-574(0.43) 699-726(2.09)                                                                                                   |
| gnl UG Hs#S1731417  | 3.34 | 1 186-212(3.34)                                                                                                                               |
| gnl UG Hs#S4631502  | 1.3  | 1 5-30(1.30)                                                                                                                                  |
| gnl UG Hs#S1730806  | 3.2  | 6 214-239(0.65) 784-808(0.46) 846-874(3.20) 1265-1291(0.40) 1606-1632(1.17) 1823-1848(1.50)                                                   |
| gnl UG Hs#S2293843  | 0.48 | 1 260-285(0.48)                                                                                                                               |
| gnl UG Hs#S1727828  | 0.13 | 1 574-599(0.13)                                                                                                                               |
| gnl UG Hs#S2138840  | 1.34 | 2 359-383(1.19) 408-436(1.34)                                                                                                                 |
| gnl UG Hs#S1727815  | 0.74 | 2 184-210(0.07) 397-422(0.74)                                                                                                                 |
| gnl UG Hs#S1727225  | 0.84 | 1 545-570(0.84)                                                                                                                               |
| gnl UG Hs#S4283940  | 0.98 | 1 90-115(0.98)                                                                                                                                |
| gnl UG Hs#S1729362  | 0.3  | 1 551-579(0.30)                                                                                                                               |
| gnl UG Hs#S3355561  | 1.08 | 1 179-205(1.08)                                                                                                                               |
| gnl UG Hs#S4813370  | 1.27 | 1 395-423(1.27)                                                                                                                               |
| gnl UG Hs#S2140221  | 0.53 | 1 512-537(0.53)                                                                                                                               |
| gnl UG Hs#S5978420  | 1.3  | 3 180-205(1.30) 1129-1154(0.08) 1315-1340(0.50)                                                                                               |
| gnl UG Hs#S1729137  | 0.91 | 1 1019-1044(0.91)                                                                                                                             |
| gnl UG Hs#S5978661  | 1.4  | 3 377-402(0.58) 408-436(1.40) 553-583(1.40)                                                                                                   |
| gnl UG Hs#S5930954  | 2.14 | 2 1084-1109(1.46) 2315-2341(2.14)                                                                                                             |
| gnl UG Hs#S2294463  | 0.01 | 1 406-432(0.01)                                                                                                                               |
| gnl UG Hs#S4285132  | 0.82 | 1 162-187(0.82)                                                                                                                               |
| gnl UG Hs#S1730679  | 0.58 | 1 770-796(0.58)                                                                                                                               |
| gnl UG Hs#S4546300  | 2.58 | 1 1352-1378(2.58)                                                                                                                             |
| gnl UG Hs#S998698   | 0.36 | 1 2350-2374(0.36)                                                                                                                             |
| gnl UG Hs#S3803386  | 0.26 | 1 519-544(0.26)                                                                                                                               |
| gnl UG Hs#S1728923  | 2.46 | 1 1174-1199(2.46)                                                                                                                             |
| gnl UG Hs#S4283853  | 3.04 | 9 819-843(0.61) 891-916(2.14) 1027-1052(1.97) 1422-1447(1.04) 1565-1588(0.45) 1666-1691(0.59) 2563-2589(0.33) 2607-2632(1.23) 2800-2825(3.04) |
| gnl UG Hs#S2333013  | 1.72 | 2 725-750(1.72) 759-787(1.47)                                                                                                                 |
| gnl UG Hs#S11046648 | 4.52 | 9 252-277(3.16) 666-694(1.17) 969-994(4.52) 1134-1159(0.98) 1190-1215(2.11) 1248-1273(0.08) 1810-1835(0.26) 2004-2030(0.03) 2117-2141(1.19)   |
| gnl UG Hs#S4807694  | 1.98 | 3 153-181(1.98) 296-325(0.20) 428-453(0.08)                                                                                                   |
| gnl UG Hs#S7111100  | 0.37 | 1 1055-1081(0.37)                                                                                                                             |
| gnl UG Hs#S1726512  | 1.23 | 4 142-168(0.88) 187-212(1.23) 250-276(0.95) 552-580(0.77)                                                                                     |
| gnl UG Hs#S2139553  | 1.78 | 3 655-680(1.46) 1373-1396(1.78) 1790-1815(0.30)                                                                                               |
| gnl UG Hs#S4553485  | 3.59 | 6 387-412(0.79) 834-859(3.59) 1683-1708(1.26) 2258-2283(1.63) 2500-2528(0.59) 2728-2756(3.03)                                                 |
| gnl UG Hs#S1729089  | 3.69 | 4 115-143(1.04) 213-238(3.69) 582-608(1.13) 632-657(0.23)                                                                                     |
| gnl UG Hs#S1729217  | 3.57 | 3 530-555(1.19) 1012-1037(1.46) 1402-1427(3.57)                                                                                               |
| gnl UG Hs#S2294387  | 5.21 | 3 350-375(5.21) 987-1012(0.21) 1025-1052(0.07)                                                                                                |
| gnl UG Hs#S1727649  | 3.35 | 1 636-660(3.35)                                                                                                                               |
| gnl UG Hs#S2293971  | 0.33 | 2 1073-1098(0.08) 1211-1242(0.33)                                                                                                             |
| gnl UG Hs#S1727080  | 0.4  | 1 192-218(0.40)                                                                                                                               |
| gnl UG Hs#S4807193  | 0.49 | 1 287-313(0.49)                                                                                                                               |
| gnl UG Hs#S4825285  | 1.74 | 2 1031-1056(1.74) 1093-1119(0.50)                                                                                                             |
| gnl UG Hs#S2140321  | 5.04 | 4 329-352(2.57) 812-839(1.49) 1544-1570(0.26) 1777-1803(5.04)                                                                                 |
| gnl UG Hs#S4615889  | 0.57 | 3 393-418(0.43) 940-968(0.16) 1362-1387(0.57)                                                                                                 |
| gnl UG Hs#S1732209  | 1.28 | 1 246-271(1.28)                                                                                                                               |
| gnl UG Hs#S4822071  | 2.25 | 1 672-695(2.25)                                                                                                                               |
| gnl UG Hs#S2294391  | 2.08 | 1 234-260(2.08)                                                                                                                               |
| gnl UG Hs#S1726397  | 1.91 | 1 246-271(1.91)                                                                                                                               |

|                     |      |                                                                                                                 |
|---------------------|------|-----------------------------------------------------------------------------------------------------------------|
| gnl UG Hs#S3973067  | 8.43 | 2 82-110(2.21) 264-289(8.43)                                                                                    |
| gnl UG Hs#S3218922  | 0.92 | 1 158-183(0.92)                                                                                                 |
| gnl UG Hs#S1727055  | 0.55 | 1 1486-1513(0.55)                                                                                               |
| gnl UG Hs#S2293244  | 1.67 | 3 69-94(1.67) 1000-1025(0.14) 1049-1074(1.54)                                                                   |
| gnl UG Hs#S1732384  | 3.07 | 1 147-175(3.07)                                                                                                 |
| gnl UG Hs#S3619211  | 1.5  | 2 49-75(1.50) 1268-1294(0.30)                                                                                   |
| gnl UG Hs#S3438641  | 0.36 | 2 61-86(0.36) 705-729(0.32)                                                                                     |
| gnl UG Hs#S2138976  | 4.11 | 1 114-139(4.11)                                                                                                 |
| gnl UG Hs#S5516656  | 0.92 | 1 2086-2111(0.92)                                                                                               |
| gnl UG Hs#S5978623  | 1.82 | 1 489-512(1.82)                                                                                                 |
| gnl UG Hs#S6693336  | 0.76 | 1 683-709(0.76)                                                                                                 |
| gnl UG Hs#S1728858  | 1.23 | 2 10-36(1.04) 337-364(1.23)                                                                                     |
| gnl UG Hs#S2294199  | 6.18 | 1 1899-1925(6.18)                                                                                               |
| gnl UG Hs#S1726324  | 1.98 | 1 701-729(1.98)                                                                                                 |
| gnl UG Hs#S1727883  | 4.04 | 1 162-187(4.04)                                                                                                 |
| gnl UG Hs#S1727206  | 0.52 | 1 576-602(0.52)                                                                                                 |
| gnl UG Hs#S2139024  | 0.94 | 1 217-242(0.94)                                                                                                 |
| gnl UG Hs#S15644167 | 1.5  | 2 252-277(0.36) 558-584(1.50)                                                                                   |
| gnl UG Hs#S2139840  | 1.62 | 7 100-123(0.28) 155-179(0.61) 582-608(0.06) 1223-1248(1.04) 1310-1335(1.53) 1394-1419(0.04) 1510-1533(1.62)     |
| gnl UG Hs#S5978543  | 0.59 | 1 565-591(0.59)                                                                                                 |
| gnl UG Hs#S1726334  | 1.04 | 1 144-169(1.04)                                                                                                 |
| gnl UG Hs#S2140581  | 0.79 | 1 1044-1069(0.79)                                                                                               |
| gnl UG Hs#S998729   | 2.48 | 3 80-105(0.98) 1086-1111(2.48) 1619-1649(0.43)                                                                  |
| gnl UG Hs#S1726747  | 3.39 | 4 273-298(3.39) 501-526(3.04) 929-957(1.40) 2299-2324(1.17)                                                     |
| gnl UG Hs#S5931225  | 2.72 | 3 575-600(2.72) 832-858(0.02) 929-953(0.85)                                                                     |
| gnl UG Hs#S1730019  | 3.11 | 3 363-390(0.62) 451-476(3.11) 972-997(0.04)                                                                     |
| gnl UG Hs#S3219389  | 0.08 | 1 140-165(0.08)                                                                                                 |
| gnl UG Hs#S1727302  | 0.84 | 2 260-285(0.84) 343-369(0.66)                                                                                   |
| gnl UG Hs#S3220076  | 3.55 | 1 1740-1768(3.55)                                                                                               |
| gnl UG Hs#S3618693  | 3.43 | 2 1370-1395(3.43) 1887-1917(0.62)                                                                               |
| gnl UG Hs#S4825428  | 0.81 | 2 1024-1049(0.81) 1328-1354(0.17)                                                                               |
| gnl UG Hs#S1731147  | 0.46 | 1 163-188(0.46)                                                                                                 |
| gnl UG Hs#S1727464  | 3.41 | 7 461-487(1.40) 1270-1296(3.41) 1356-1381(0.65) 1396-1424(1.07) 1550-1575(0.03) 1615-1641(1.50) 1760-1788(2.97) |
| gnl UG Hs#S15639934 | 1.71 | 2 191-216(0.07) 2564-2592(1.71)                                                                                 |
| gnl UG Hs#S3993264  | 0.98 | 2 12-37(0.39) 358-383(0.98)                                                                                     |
| gnl UG Hs#S10832743 | 3.57 | 3 1003-1029(3.57) 1512-1536(2.21) 1840-1866(0.53)                                                               |
| gnl UG Hs#S2138915  | 6.82 | 3 187-213(3.08) 285-311(6.82) 377-401(2.07)                                                                     |
| gnl UG Hs#S2140021  | 3.11 | 4 358-383(3.11) 421-450(0.30) 760-787(0.58) 942-968(0.76)                                                       |
| gnl UG Hs#S1727833  | 2.81 | 7 88-114(0.98) 221-246(0.07) 321-346(0.72) 367-392(2.81) 954-981(0.88) 1355-1381(1.50) 1422-1447(0.97)          |
| gnl UG Hs#S3880590  | 0.98 | 1 381-406(0.98)                                                                                                 |
| gnl UG Hs#S2139359  | 3.47 | 1 298-326(3.47)                                                                                                 |
| gnl UG Hs#S4807759  | 0.98 | 1 1136-1161(0.98)                                                                                               |
| gnl UG Hs#S10832569 | 1.4  | 2 85-110(0.57) 738-761(1.40)                                                                                    |
| gnl UG Hs#S14802299 | 1.79 | 7 177-202(0.97) 291-316(1.79) 468-496(0.17) 505-530(1.21) 636-663(0.54) 842-868(1.30) 911-936(0.23)             |
| gnl UG Hs#S7112092  | 0.2  | 1 1461-1486(0.20)                                                                                               |
| gnl UG Hs#S2140611  | 1.98 | 3 1174-1199(1.33) 1233-1261(1.49) 1263-1289(1.98)                                                               |
| gnl UG Hs#S1731713  | 2.57 | 4 631-656(0.26) 871-894(1.99) 916-941(2.57) 2335-2360(0.30)                                                     |
| gnl UG Hs#S4807923  | 4.45 | 1 1139-1164(4.45)                                                                                               |
| gnl UG Hs#S3219897  | 1.89 | 2 47-76(0.84) 637-663(1.89)                                                                                     |
| gnl UG Hs#S2294437  | 1.3  | 1 571-599(1.30)                                                                                                 |
| gnl UG Hs#S4618785  | 0.4  | 1 824-849(0.40)                                                                                                 |
| gnl UG Hs#S1727563  | 3.3  | 1 563-589(3.30)                                                                                                 |
| gnl UG Hs#S1727218  | 1.76 | 2 222-247(1.76) 365-390(0.98)                                                                                   |
| gnl UG Hs#S3905473  | 1.68 | 1 166-190(1.68)                                                                                                 |

|                     |      |                                                                                                                          |
|---------------------|------|--------------------------------------------------------------------------------------------------------------------------|
| gnl UG Hs#S15634005 | 2.98 | 8 115-140(1.40) 145-170(2.40) 175-200(1.40) 205-230(2.98) 990-1016(0.08) 1243-1268(1.16) 1576-1601(0.47) 1727-1752(1.63) |
| gnl UG Hs#S2139560  | 1.72 | 2 191-217(1.72) 226-254(0.81)                                                                                            |
| gnl UG Hs#S2140452  | 2.76 | 1 196-223(2.76)                                                                                                          |
| gnl UG Hs#S1729829  | 2.24 | 1 49-75(2.24)                                                                                                            |
| gnl UG Hs#S1732099  | 1.95 | 1 1002-1026(1.95)                                                                                                        |
| gnl UG Hs#S3438595  | 0.56 | 1 164-189(0.56)                                                                                                          |
| gnl UG Hs#S4546061  | 0.17 | 1 517-543(0.17)                                                                                                          |
| gnl UG Hs#S15730312 | 1.16 | 2 215-241(0.76) 1221-1246(1.16)                                                                                          |
| gnl UG Hs#S1727162  | 1.43 | 1 1046-1072(1.43)                                                                                                        |
| gnl UG Hs#S1824455  | 2.1  | 1 54-80(2.10)                                                                                                            |
| gnl UG Hs#S4812062  | 2.5  | 1 641-669(2.50)                                                                                                          |
| gnl UG Hs#S3542701  | 2.94 | 1 209-234(2.94)                                                                                                          |
| gnl UG Hs#S15637839 | 0.59 | 1 625-651(0.59)                                                                                                          |
| gnl UG Hs#S1824564  | 1.05 | 1 96-121(1.05)                                                                                                           |
| gnl UG Hs#S1730279  | 0.72 | 3 56-81(0.26) 405-430(0.26) 574-600(0.72)                                                                                |
| gnl UG Hs#S2293533  | 2.51 | 5 1033-1058(2.26) 1278-1305(0.08) 1656-1681(0.17) 1819-1845(2.51) 1874-1899(0.91)                                        |
| gnl UG Hs#S3602296  | 1.11 | 5 1074-1099(1.11) 1292-1317(0.89) 1411-1436(0.14) 1531-1557(0.76) 1842-1867(0.04)                                        |
| gnl UG Hs#S1731917  | 1.65 | 3 73-96(0.67) 287-315(0.59) 447-472(1.65)                                                                                |
| gnl UG Hs#S1728408  | 2.75 | 1 248-273(2.75)                                                                                                          |
| gnl UG Hs#S2140577  | 3.8  | 1 188-211(3.80)                                                                                                          |
| gnl UG Hs#S2139358  | 0.11 | 1 62-85(0.11)                                                                                                            |
| gnl UG Hs#S4553513  | 5.43 | 5 61-89(2.47) 120-145(0.14) 277-302(2.97) 760-785(1.26) 934-959(5.43)                                                    |
| gnl UG Hs#S1727885  | 2.75 | 3 422-450(2.75) 988-1014(0.43) 961-986(0.30)                                                                             |
| gnl UG Hs#S2294538  | 0.51 | 2 1222-1248(0.01) 1846-1874(0.51)                                                                                        |
| gnl UG Hs#S1729915  | 2.04 | 1 214-240(2.04)                                                                                                          |
| gnl UG Hs#S1824316  | 3.11 | 3 11-36(1.11) 916-942(0.01) 1126-1151(3.11)                                                                              |
| gnl UG Hs#S2139926  | 1    | 1 12-38(1.00)                                                                                                            |
| gnl UG Hs#S14272931 | 2.3  | 1 65-90(2.30)                                                                                                            |
| gnl UG Hs#S4615763  | 0.48 | 1 688-713(0.48)                                                                                                          |
| gnl UG Hs#S2138748  | 0.66 | 1 966-992(0.66)                                                                                                          |
| gnl UG Hs#S4810170  | 2.17 | 2 71-97(0.01) 111-136(2.17)                                                                                              |
| gnl UG Hs#S4396072  | 1.57 | 2 194-220(1.07) 294-320(1.57)                                                                                            |
| gnl UG Hs#S7111211  | 1.3  | 1 230-258(1.30)                                                                                                          |
| gnl UG Hs#S1730334  | 1.17 | 1 639-664(1.17)                                                                                                          |
| gnl UG Hs#S3322283  | 0.76 | 1 607-632(0.76)                                                                                                          |
| gnl UG Hs#S1824265  | 0.76 | 1 371-396(0.76)                                                                                                          |
| gnl UG Hs#S3438627  | 1.87 | 3 218-243(0.58) 381-406(0.72) 1419-1443(1.87)                                                                            |
| gnl UG Hs#S1730917  | 1.01 | 2 513-538(0.20) 618-644(1.01)                                                                                            |
| gnl UG Hs#S4807547  | 2.33 | 2 407-435(2.33) 818-843(2.04)                                                                                            |
| gnl UG Hs#S11046582 | 0.31 | 1 571-596(0.31)                                                                                                          |
| gnl UG Hs#S14863765 | 4.98 | 7 382-406(1.62) 409-434(3.89) 534-560(0.12) 592-620(4.98) 1142-1169(0.65) 1235-1260(1.06) 1625-1653(0.23)                |
| gnl UG Hs#S3438793  | 1.3  | 3 251-276(1.30) 369-395(0.08) 924-949(0.81)                                                                              |
| gnl UG Hs#S3619176  | 1.4  | 2 120-143(1.29) 252-280(1.40)                                                                                            |
| gnl UG Hs#S3619105  | 4.14 | 2 291-317(0.08) 1578-1605(4.14)                                                                                          |
| gnl UG Hs#S11046694 | 2.62 | 1 1872-1900(2.62)                                                                                                        |
| gnl UG Hs#S1731899  | 1.63 | 1 798-823(1.63)                                                                                                          |
| gnl UG Hs#S1731194  | 1.49 | 1 453-481(1.49)                                                                                                          |
| gnl UG Hs#S14802453 | 2.3  | 7 209-234(2.30) 302-328(0.01) 559-584(0.13) 1694-1719(2.13) 1904-1929(2.13) 1947-1975(1.16) 2280-2308(0.68)              |
| gnl UG Hs#S11154012 | 1.87 | 4 191-216(0.58) 246-271(1.84) 727-752(1.87) 1174-1201(1.33)                                                              |
| gnl UG Hs#S1732178  | 1.24 | 1 2544-2569(1.24)                                                                                                        |
| gnl UG Hs#S4807828  | 1.08 | 1 1015-1041(1.08)                                                                                                        |
| gnl UG Hs#S1726316  | 1.49 | 1 165-193(1.49)                                                                                                          |
| gnl UG Hs#S3219138  | 4.47 | 6 363-388(4.47) 738-764(2.76) 1295-1323(1.24) 2329-2354(2.23) 3333-3358(2.04) 3388-3413(0.14)                            |
| gnl UG Hs#S3601760  | 0.78 | 2 849-876(0.78) 1280-1305(0.36)                                                                                          |



|                     |      |                                                                                                                                                                                            |
|---------------------|------|--------------------------------------------------------------------------------------------------------------------------------------------------------------------------------------------|
| gnl UG Hs#S3219470  | 0.34 | 1 237-263(0.34)                                                                                                                                                                            |
| gnl UG Hs#S4825822  | 1.21 | 1 1395-1420(1.21)                                                                                                                                                                          |
| gnl UG Hs#S5517591  | 2.9  | 2 290-318(2.90) 1332-1357(1.87)                                                                                                                                                            |
| gnl UG Hs#S6163433  | 2.69 | 4 172-197(0.08) 895-920(2.23) 980-1005(2.69) 1150-1176(1.08)                                                                                                                               |
| gnl UG Hs#S2294332  | 0.01 | 1 329-354(0.01)                                                                                                                                                                            |
| gnl UG Hs#S1728713  | 2.63 | 2 825-850(2.63) 918-943(2.33)                                                                                                                                                              |
| gnl UG Hs#S1824386  | 1.72 | 3 21-46(1.13) 223-249(1.50) 1125-1148(1.72)                                                                                                                                                |
| gnl UG Hs#S4620923  | 0.91 | 1 1002-1028(0.91)                                                                                                                                                                          |
| gnl UG Hs#S15636411 | 0.32 | 1 597-622(0.32)                                                                                                                                                                            |
| gnl UG Hs#S1732198  | 1.57 | 1 227-252(1.57)                                                                                                                                                                            |
| gnl UG Hs#S1728576  | 1.36 | 2 422-448(0.50) 772-799(1.36)                                                                                                                                                              |
| gnl UG Hs#S1727234  | 1.26 | 3 1371-1396(0.87) 1408-1434(0.62) 1527-1551(1.26)                                                                                                                                          |
| gnl UG Hs#S2139661  | 2.15 | 2 688-713(1.43) 2736-2761(2.15)                                                                                                                                                            |
| gnl UG Hs#S4631269  | 0.01 | 1 588-614(0.01)                                                                                                                                                                            |
| gnl UG Hs#S11046563 | 1.72 | 3 123-148(1.39) 811-836(1.72) 992-1017(0.88)                                                                                                                                               |
| gnl UG Hs#S1729056  | 0.43 | 1 1327-1350(0.43)                                                                                                                                                                          |
| gnl UG Hs#S2140262  | 2.13 | 2 79-104(2.13) 541-565(0.41)                                                                                                                                                               |
| gnl UG Hs#S4821537  | 2.82 | 3 185-213(1.55) 287-312(2.82) 352-380(1.73)                                                                                                                                                |
| gnl UG Hs#S1971575  | 2.94 | 5 485-510(1.30) 1086-1114(2.94) 1413-1441(2.75) 2004-2029(0.14) 2636-2661(2.11)                                                                                                            |
| gnl UG Hs#S15630436 | 3.46 | 1 124-149(3.46)                                                                                                                                                                            |
| gnl UG Hs#S2140347  | 3.55 | 2 151-176(0.67) 736-764(3.55)                                                                                                                                                              |
| gnl UG Hs#S1730973  | 1.72 | 4 273-298(1.72) 323-353(0.66) 592-617(0.72) 1923-1948(0.78)                                                                                                                                |
| gnl UG Hs#S1726408  | 1.79 | 2 155-184(0.90) 311-337(1.79)                                                                                                                                                              |
| gnl UG Hs#S1730076  | 2.19 | 3 123-148(2.19) 1048-1073(0.90) 1111-1136(0.30)                                                                                                                                            |
| gnl UG Hs#S3437929  | 1.2  | 1 312-337(1.20)                                                                                                                                                                            |
| gnl UG Hs#S4813525  | 1.48 | 1 1476-1501(1.48)                                                                                                                                                                          |
| gnl UG Hs#S2139458  | 3.55 | 3 15-41(0.17) 204-233(1.09) 701-727(3.55)                                                                                                                                                  |
| gnl UG Hs#S2139380  | 1.5  | 4 7-32(1.50) 38-63(0.48) 133-158(0.14) 178-203(0.23)                                                                                                                                       |
| gnl UG Hs#S2139030  | 0.04 | 1 231-256(0.04)                                                                                                                                                                            |
| gnl UG Hs#S3219868  | 1.09 | 4 127-153(1.09) 484-509(0.72) 894-919(0.46) 1034-1059(0.04)                                                                                                                                |
| gnl UG Hs#S3601740  | 1.63 | 1 3599-3623(1.63)                                                                                                                                                                          |
| gnl UG Hs#S3438950  | 1.85 | 1 148-172(1.85)                                                                                                                                                                            |
| gnl UG Hs#S2140554  | 0.65 | 1 169-195(0.65)                                                                                                                                                                            |
| gnl UG Hs#S11590930 | 8.37 | 1 244-269(8.37)                                                                                                                                                                            |
| gnl UG Hs#S1728778  | 0.89 | 2 37-64(0.40) 78-103(0.89)                                                                                                                                                                 |
| gnl UG Hs#S1727391  | 1.98 | 2 1493-1522(0.06) 1603-1631(1.98)                                                                                                                                                          |
| gnl UG Hs#S10832310 | 0.5  | 3 562-587(0.13) 1132-1158(0.50) 1242-1272(0.46)                                                                                                                                            |
| gnl UG Hs#S10831934 | 0.34 | 1 1333-1359(0.34)                                                                                                                                                                          |
| gnl UG Hs#S15633910 | 7.26 | 6 833-858(7.26) 1086-1112(1.17) 1269-1295(0.04) 1309-1335(0.50) 1807-1830(1.15) 1941-1966(0.89)                                                                                            |
| gnl UG Hs#S4815008  | 5.44 | 6 442-468(5.44) 984-1009(0.94) 1480-1506(0.43) 1802-1828(0.91) 1946-1972(0.82) 2169-2195(0.30)                                                                                             |
| gnl UG Hs#S4392147  | 1.41 | 4 232-257(1.41) 607-632(1.04) 641-667(0.30) 966-991(0.58)                                                                                                                                  |
| gnl UG Hs#S2294202  | 6.18 | 1 1899-1925(6.18)                                                                                                                                                                          |
| gnl UG Hs#S6163282  | 0.16 | 1 454-479(0.16)                                                                                                                                                                            |
| gnl UG Hs#S4044961  | 4.13 | 3 208-233(1.37) 356-381(4.13) 619-645(1.98)                                                                                                                                                |
| gnl UG Hs#S1731789  | 0.67 | 2 468-494(0.67) 921-949(0.16)                                                                                                                                                              |
| gnl UG Hs#S1731679  | 1.11 | 2 119-144(1.11) 1020-1046(0.14)                                                                                                                                                            |
| gnl UG Hs#S3218972  | 1.99 | 2 731-754(1.99) 2031-2054(0.62)                                                                                                                                                            |
| gnl UG Hs#S3438702  | 1.98 | 1 1806-1834(1.98)                                                                                                                                                                          |
| gnl UG Hs#S2293605  | 2.01 | 1 560-584(2.01)                                                                                                                                                                            |
| gnl UG Hs#S3219265  | 1.04 | 1 517-543(1.04)                                                                                                                                                                            |
| gnl UG Hs#S4553186  | 0.94 | 2 695-721(0.94) 946-974(0.71)                                                                                                                                                              |
| gnl UG Hs#S1728814  | 1.08 | 4 390-415(1.01) 1611-1638(0.07) 1751-1776(1.08) 1992-2020(0.55)                                                                                                                            |
| gnl UG Hs#S1971488  | 3.98 | 12 66-93(1.37) 444-469(1.33) 535-560(0.63) 1014-1038(0.13) 1145-1172(0.45) 1449-1477(1.44) 1965-1991(3.98) 2133-2161(0.30) 2438-2463(1.23) 2832-2860(2.20) 3318-3343(0.23) 3536-3561(0.91) |
| gnl UG Hs#S3438551  | 1.04 | 1 541-566(1.04)                                                                                                                                                                            |

|                     |      |    |                 |                 |                 |                 |                 |                 |                 |                 |                 |                 |
|---------------------|------|----|-----------------|-----------------|-----------------|-----------------|-----------------|-----------------|-----------------|-----------------|-----------------|-----------------|
| gnl UG Hs#S10831734 | 2.2  | 2  | 671-696(0.20)   | 1088-1113(2.20) |                 |                 |                 |                 |                 |                 |                 |                 |
| gnl UG Hs#S4553505  | 2.58 | 10 | 461-486(0.76)   | 497-525(0.59)   | 1179-1206(1.07) | 1508-1536(0.04) | 2274-2299(1.17) | 2548-2573(0.91) | 3338-3366(1.30) | 3865-3890(0.43) | 4755-4781(2.58) | 4889-4914(0.40) |
| gnl UG Hs#S3547212  | 1.95 | 4  | 319-346(0.75)   | 737-762(1.95)   | 1366-1391(0.40) | 1447-1475(0.05) |                 |                 |                 |                 |                 |                 |
| gnl UG Hs#S1824415  | 0.29 | 1  | 1354-1378(0.29) |                 |                 |                 |                 |                 |                 |                 |                 |                 |
| gnl UG Hs#S1729952  | 1.33 | 3  | 286-311(0.87)   | 357-382(0.91)   | 504-529(1.33)   |                 |                 |                 |                 |                 |                 |                 |
| gnl UG Hs#S2140079  | 1.24 | 1  | 463-488(1.24)   |                 |                 |                 |                 |                 |                 |                 |                 |                 |
| gnl UG Hs#S2140236  | 2.72 | 2  | 989-1015(0.82)  | 1265-1290(2.72) |                 |                 |                 |                 |                 |                 |                 |                 |
| gnl UG Hs#S3439110  | 0.25 | 1  | 644-670(0.25)   |                 |                 |                 |                 |                 |                 |                 |                 |                 |
| gnl UG Hs#S7110562  | 3.89 | 1  | 794-819(3.89)   |                 |                 |                 |                 |                 |                 |                 |                 |                 |
| gnl UG Hs#S3438990  | 2.57 | 1  | 188-213(2.57)   |                 |                 |                 |                 |                 |                 |                 |                 |                 |
| gnl UG Hs#S4807934  | 1.49 | 1  | 1210-1238(1.49) |                 |                 |                 |                 |                 |                 |                 |                 |                 |
| gnl UG Hs#S1731226  | 1.3  | 3  | 338-364(0.21)   | 597-622(1.04)   | 1483-1511(1.30) |                 |                 |                 |                 |                 |                 |                 |
| gnl UG Hs#S2139552  | 0.72 | 3  | 964-989(0.72)   | 1254-1277(0.52) | 1700-1726(0.49) |                 |                 |                 |                 |                 |                 |                 |
| gnl UG Hs#S14813067 | 1.94 | 2  | 1313-1341(1.27) | 1748-1773(1.94) |                 |                 |                 |                 |                 |                 |                 |                 |
| gnl UG Hs#S4044945  | 1.76 | 5  | 147-173(1.76)   | 325-350(0.72)   | 381-406(1.07)   | 482-509(0.34)   | 553-579(0.36)   |                 |                 |                 |                 |                 |
| gnl UG Hs#S3603856  | 1.33 | 1  | 315-343(1.33)   |                 |                 |                 |                 |                 |                 |                 |                 |                 |
| gnl UG Hs#S4285067  | 1.04 | 1  | 751-775(1.04)   |                 |                 |                 |                 |                 |                 |                 |                 |                 |
| gnl UG Hs#S1728903  | 1.08 | 1  | 19-45(1.08)     |                 |                 |                 |                 |                 |                 |                 |                 |                 |
| gnl UG Hs#S1726588  | 0.58 | 2  | 229-254(0.58)   | 392-417(0.04)   |                 |                 |                 |                 |                 |                 |                 |                 |
| gnl UG Hs#S1728188  | 1.94 | 2  | 161-187(0.91)   | 305-330(1.94)   |                 |                 |                 |                 |                 |                 |                 |                 |
| gnl UG Hs#S5979274  | 4.49 | 3  | 69-95(2.08)     | 790-818(4.49)   | 870-896(0.36)   |                 |                 |                 |                 |                 |                 |                 |
| gnl UG Hs#S1732401  | 2.72 | 2  | 1056-1081(2.72) | 2002-2028(0.65) |                 |                 |                 |                 |                 |                 |                 |                 |
| gnl UG Hs#S4554567  | 2.62 | 2  | 571-599(2.62)   | 1036-1061(0.23) |                 |                 |                 |                 |                 |                 |                 |                 |
| gnl UG Hs#S1728898  | 6.21 | 7  | 84-110(1.30)    | 251-280(3.25)   | 369-395(6.21)   | 1030-1056(0.30) | 1627-1653(0.49) | 1656-1684(1.81) | 1805-1830(1.72) |                 |                 |                 |
| gnl UG Hs#S4631299  | 0.67 | 2  | 1885-1911(0.67) | 2792-2816(0.22) |                 |                 |                 |                 |                 |                 |                 |                 |
| gnl UG Hs#S1729107  | 4.86 | 5  | 3-29(1.55)      | 575-603(4.21)   | 624-649(1.04)   | 659-684(0.11)   | 885-911(4.86)   |                 |                 |                 |                 |                 |
| gnl UG Hs#S1730252  | 4.3  | 2  | 125-151(4.30)   | 168-193(0.08)   |                 |                 |                 |                 |                 |                 |                 |                 |
| gnl UG Hs#S7110125  | 0.59 | 1  | 1437-1463(0.59) |                 |                 |                 |                 |                 |                 |                 |                 |                 |
| gnl UG Hs#S3220166  | 1.31 | 1  | 2430-2453(1.31) |                 |                 |                 |                 |                 |                 |                 |                 |                 |
| gnl UG Hs#S3542679  | 2.88 | 1  | 1137-1164(2.88) |                 |                 |                 |                 |                 |                 |                 |                 |                 |
| gnl UG Hs#S4808261  | 0.72 | 1  | 187-213(0.72)   |                 |                 |                 |                 |                 |                 |                 |                 |                 |
| gnl UG Hs#S4392392  | 2.08 | 1  | 828-853(2.08)   |                 |                 |                 |                 |                 |                 |                 |                 |                 |
| gnl UG Hs#S3619222  | 2.97 | 5  | 441-465(0.22)   | 749-774(2.97)   | 909-934(1.07)   | 1016-1042(1.69) | 1145-1168(0.26) |                 |                 |                 |                 |                 |
| gnl UG Hs#S1729337  | 1.98 | 3  | 814-840(0.01)   | 1513-1538(1.98) | 1836-1861(0.26) |                 |                 |                 |                 |                 |                 |                 |
| gnl UG Hs#S1729125  | 1.3  | 1  | 201-226(1.30)   |                 |                 |                 |                 |                 |                 |                 |                 |                 |
| gnl UG Hs#S1731567  | 2.5  | 1  | 368-393(2.50)   |                 |                 |                 |                 |                 |                 |                 |                 |                 |
| gnl UG Hs#S1727254  | 2.52 | 1  | 713-738(2.52)   |                 |                 |                 |                 |                 |                 |                 |                 |                 |
| gnl UG Hs#S4810286  | 1.27 | 1  | 2625-2651(1.27) |                 |                 |                 |                 |                 |                 |                 |                 |                 |
| gnl UG Hs#S10832380 | 0.84 | 3  | 965-991(0.84)   | 1330-1353(0.41) | 1582-1608(0.21) |                 |                 |                 |                 |                 |                 |                 |
| gnl UG Hs#S14863629 | 2.58 | 3  | 7-32(2.58)      | 1500-1526(1.98) | 1540-1566(0.52) |                 |                 |                 |                 |                 |                 |                 |
| gnl UG Hs#S4810955  | 2.46 | 3  | 1526-1552(0.04) | 3295-3320(1.72) | 3544-3569(2.46) |                 |                 |                 |                 |                 |                 |                 |
| gnl UG Hs#S2139653  | 0.6  | 2  | 411-436(0.60)   | 1244-1269(0.17) |                 |                 |                 |                 |                 |                 |                 |                 |
| gnl UG Hs#S3547079  | 0.55 | 1  | 83-108(0.55)    |                 |                 |                 |                 |                 |                 |                 |                 |                 |
| gnl UG Hs#S2293914  | 0.72 | 1  | 100-125(0.72)   |                 |                 |                 |                 |                 |                 |                 |                 |                 |
| gnl UG Hs#S15633917 | 0.82 | 1  | 117-142(0.82)   |                 |                 |                 |                 |                 |                 |                 |                 |                 |
| gnl UG Hs#S6693105  | 0.76 | 1  | 2438-2463(0.76) |                 |                 |                 |                 |                 |                 |                 |                 |                 |
| gnl UG Hs#S2138987  | 3.82 | 4  | 141-167(0.84)   | 494-519(3.82)   | 1185-1210(0.24) | 1551-1576(0.07) |                 |                 |                 |                 |                 |                 |
| gnl UG Hs#S1729556  | 3.21 | 3  | 176-201(0.04)   | 279-304(3.21)   | 817-842(0.57)   |                 |                 |                 |                 |                 |                 |                 |
| gnl UG Hs#S15633374 | 0.5  | 1  | 188-214(0.50)   |                 |                 |                 |                 |                 |                 |                 |                 |                 |
| gnl UG Hs#S4553533  | 1.08 | 1  | 422-448(1.08)   |                 |                 |                 |                 |                 |                 |                 |                 |                 |
| gnl UG Hs#S1730436  | 0.08 | 1  | 169-195(0.08)   |                 |                 |                 |                 |                 |                 |                 |                 |                 |
| gnl UG Hs#S2138947  | 0.66 | 1  | 1469-1497(0.66) |                 |                 |                 |                 |                 |                 |                 |                 |                 |
| gnl UG Hs#S1727527  | 1.98 | 5  | 105-130(0.72)   | 1055-1080(0.94) | 1221-1244(1.98) | 1643-1668(1.30) | 2026-2052(1.72) |                 |                 |                 |                 |                 |
| gnl UG Hs#S1824292  | 1.82 | 1  | 330-356(1.82)   |                 |                 |                 |                 |                 |                 |                 |                 |                 |

|                     |      |    |                                                                                                                                                                       |
|---------------------|------|----|-----------------------------------------------------------------------------------------------------------------------------------------------------------------------|
| gnl UG Hs#S14802476 | 1.29 | 5  | 112-138(1.25) 209-234(0.72) 517-541(1.29) 641-666(0.50) 701-724(0.69)                                                                                                 |
| gnl UG Hs#S1569546  | 1.3  | 2  | 572-596(1.30) 1072-1097(0.91)                                                                                                                                         |
| gnl UG Hs#S1728116  | 0.46 | 1  | 173-199(0.46)                                                                                                                                                         |
| gnl UG Hs#S2139364  | 1.17 | 1  | 324-350(1.17)                                                                                                                                                         |
| gnl UG Hs#S15636192 | 2.91 | 3  | 26-51(0.20) 1416-1444(1.94) 2005-2033(2.91)                                                                                                                           |
| gnl UG Hs#S3219701  | 1    | 1  | 160-182(1.00)                                                                                                                                                         |
| gnl UG Hs#S3547095  | 0.72 | 4  | 632-657(0.21) 765-790(0.72) 1070-1097(0.24) 1155-1180(0.65)                                                                                                           |
| gnl UG Hs#S5930838  | 1.3  | 3  | 2374-2400(0.50) 4548-4573(0.43) 6281-6309(1.30)                                                                                                                       |
| gnl UG Hs#S1726468  | 3.65 | 3  | 129-155(0.08) 168-193(3.65) 338-363(2.82)                                                                                                                             |
| gnl UG Hs#S7111053  | 0.72 | 1  | 728-754(0.72)                                                                                                                                                         |
| gnl UG Hs#S1729890  | 2.04 | 1  | 365-390(2.04)                                                                                                                                                         |
| gnl UG Hs#S1730274  | 5.39 | 2  | 124-149(5.39) 291-316(1.03)                                                                                                                                           |
| gnl UG Hs#S4811031  | 1.49 | 2  | 371-400(1.49) 670-695(0.36)                                                                                                                                           |
| gnl UG Hs#S4813479  | 1.53 | 1  | 125-150(1.53)                                                                                                                                                         |
| gnl UG Hs#S3817889  | 3.13 | 4  | 121-149(1.59) 162-187(3.13) 996-1022(2.60) 1561-1586(0.99)                                                                                                            |
| gnl UG Hs#S2294364  | 3.46 | 2  | 314-339(3.46) 539-567(0.88)                                                                                                                                           |
| gnl UG Hs#S1729902  | 1.21 | 2  | 12-37(0.91) 492-516(1.21)                                                                                                                                             |
| gnl UG Hs#S3782085  | 2.3  | 1  | 428-456(2.30)                                                                                                                                                         |
| gnl UG Hs#S3219029  | 2.94 | 4  | 419-444(0.43) 721-749(0.14) 1148-1176(0.39) 1475-1500(2.94)                                                                                                           |
| gnl UG Hs#S2293938  | 0.27 | 2  | 119-145(0.27) 165-189(0.04)                                                                                                                                           |
| gnl UG Hs#S1732090  | 0.2  | 2  | 256-281(0.20) 516-544(0.18)                                                                                                                                           |
| gnl UG Hs#S2138813  | 3.14 | 3  | 533-559(0.17) 956-981(1.21) 1345-1371(3.14)                                                                                                                           |
| gnl UG Hs#S1728157  | 1.18 | 1  | 1764-1792(1.18)                                                                                                                                                       |
| gnl UG Hs#S15641149 | 3.94 | 1  | 616-641(3.94)                                                                                                                                                         |
| gnl UG Hs#S14273254 | 3.17 | 11 | 163-188(1.98) 307-335(2.13) 555-580(0.72) 596-622(1.76) 953-978(0.18) 1031-1054(1.50) 1505-1530(3.17) 1545-1572(0.58) 1648-1673(0.13) 2163-2188(0.52) 2239-2265(0.95) |
| gnl UG Hs#S1729761  | 1.26 | 2  | 587-613(0.62) 1172-1199(1.26)                                                                                                                                         |
| gnl UG Hs#S15631446 | 2.37 | 4  | 191-218(2.37) 973-998(0.88) 1111-1135(1.08) 2471-2496(0.89)                                                                                                           |
| gnl UG Hs#S3601729  | 1.84 | 1  | 510-538(1.84)                                                                                                                                                         |
| gnl UG Hs#S3993746  | 1.46 | 2  | 172-198(0.84) 508-531(1.46)                                                                                                                                           |
| gnl UG Hs#S3619577  | 1.63 | 1  | 554-579(1.63)                                                                                                                                                         |
| gnl UG Hs#S4619741  | 0.65 | 1  | 1248-1276(0.65)                                                                                                                                                       |
| gnl UG Hs#S3547104  | 2.71 | 1  | 1530-1555(2.71)                                                                                                                                                       |
| gnl UG Hs#S4614744  | 0.91 | 1  | 947-972(0.91)                                                                                                                                                         |
| gnl UG Hs#S1824500  | 4.34 | 5  | 512-538(0.01) 607-632(0.72) 734-760(0.50) 1272-1300(4.34) 1317-1342(0.13)                                                                                             |
| gnl UG Hs#S3619552  | 1.3  | 1  | 868-894(1.30)                                                                                                                                                         |
| gnl UG Hs#S3220027  | 1.3  | 1  | 164-192(1.30)                                                                                                                                                         |
| gnl UG Hs#S2138900  | 0.08 | 1  | 1212-1238(0.08)                                                                                                                                                       |
| gnl UG Hs#S1728552  | 0.23 | 1  | 195-220(0.23)                                                                                                                                                         |
| gnl UG Hs#S3219935  | 1.74 | 2  | 430-457(1.74) 1861-1888(0.37)                                                                                                                                         |
| gnl UG Hs#S4810796  | 2.43 | 1  | 2255-2281(2.43)                                                                                                                                                       |
| gnl UG Hs#S14802335 | 0.08 | 1  | 512-538(0.08)                                                                                                                                                         |
| gnl UG Hs#S3322087  | 1.62 | 3  | 27-52(0.20) 177-202(1.62) 343-368(0.23)                                                                                                                               |
| gnl UG Hs#S3438857  | 0.81 | 2  | 1113-1138(0.36) 1411-1436(0.81)                                                                                                                                       |
| gnl UG Hs#S4807606  | 2.82 | 2  | 1220-1246(2.82) 1945-1971(0.08)                                                                                                                                       |
| gnl UG Hs#S2139738  | 2.72 | 1  | 371-396(2.72)                                                                                                                                                         |
| gnl UG Hs#S1824339  | 3.89 | 3  | 100-126(3.89) 449-473(1.23) 667-693(1.34)                                                                                                                             |
| gnl UG Hs#S3219256  | 5.53 | 1  | 157-182(5.53)                                                                                                                                                         |
| gnl UG Hs#S5978389  | 3.4  | 2  | 308-333(1.79) 704-729(3.40)                                                                                                                                           |
| gnl UG Hs#S5517025  | 3.3  | 3  | 2788-2816(3.30) 2851-2876(1.33) 2946-2971(2.04)                                                                                                                       |
| gnl UG Hs#S1727190  | 3.82 | 4  | 1015-1041(3.82) 1525-1550(1.47) 1624-1651(0.43) 1670-1696(1.20)                                                                                                       |
| gnl UG Hs#S4807676  | 0.23 | 1  | 47-75(0.23)                                                                                                                                                           |
| gnl UG Hs#S2294413  | 1.52 | 1  | 294-320(1.52)                                                                                                                                                         |
| gnl UG Hs#S3987116  | 2.2  | 2  | 145-173(2.20) 270-295(0.40)                                                                                                                                           |
| gnl UG Hs#S4821132  | 1.27 | 1  | 323-349(1.27)                                                                                                                                                         |

|                     |      |   |                                                                                                                        |
|---------------------|------|---|------------------------------------------------------------------------------------------------------------------------|
| gnl UG Hs#S4044533  | 0.84 | 2 | 81-106(0.36) 129-157(0.84)                                                                                             |
| gnl UG Hs#S6686999  | 1.72 | 3 | 804-832(1.72) 1406-1431(0.76) 1904-1928(0.04)                                                                          |
| gnl UG Hs#S6163072  | 3.39 | 3 | 157-182(0.91) 1300-1325(3.39) 1477-1502(0.63)                                                                          |
| gnl UG Hs#S4818504  | 2.3  | 1 | 1296-1321(2.30)                                                                                                        |
| gnl UG Hs#S2294018  | 2.04 | 1 | 991-1016(2.04)                                                                                                         |
| gnl UG Hs#S11046627 | 3.56 | 2 | 733-761(3.56) 1059-1084(3.21)                                                                                          |
| gnl UG Hs#S2140207  | 2.2  | 1 | 322-347(2.20)                                                                                                          |
| gnl UG Hs#S3990798  | 2.58 | 3 | 193-218(0.94) 409-438(1.14) 621-647(2.58)                                                                              |
| gnl UG Hs#S3438781  | 2.24 | 1 | 142-169(2.24)                                                                                                          |
| gnl UG Hs#S2293665  | 2.65 | 2 | 510-535(2.65) 1593-1619(0.17)                                                                                          |
| gnl UG Hs#S1732035  | 1.3  | 2 | 146-174(1.30) 604-630(0.17)                                                                                            |
| gnl UG Hs#S2139768  | 1.34 | 2 | 397-423(0.50) 950-975(1.34)                                                                                            |
| gnl UG Hs#S4820780  | 1.01 | 1 | 44-70(1.01)                                                                                                            |
| gnl UG Hs#S10831780 | 1.72 | 2 | 676-702(0.69) 1416-1442(1.72)                                                                                          |
| gnl UG Hs#S11046641 | 0.62 | 2 | 854-879(0.23) 914-939(0.62)                                                                                            |
| gnl UG Hs#S5978442  | 2.56 | 3 | 463-492(2.56) 500-525(1.63) 566-591(1.38)                                                                              |
| gnl UG Hs#S1727152  | 2.3  | 5 | 659-684(1.25) 758-786(0.55) 921-947(0.72) 1003-1028(2.30) 1880-1906(0.43)                                              |
| gnl UG Hs#S3601534  | 1.85 | 1 | 220-245(1.85)                                                                                                          |
| gnl UG Hs#S14902414 | 0.2  | 1 | 1968-1993(0.20)                                                                                                        |
| gnl UG Hs#S3219968  | 1.3  | 2 | 1611-1636(1.11) 2158-2183(1.30)                                                                                        |
| gnl UG Hs#S11046689 | 1.2  | 2 | 1006-1034(1.20) 1119-1144(0.91)                                                                                        |
| gnl UG Hs#S15636653 | 1.17 | 3 | 7-34(0.16) 74-100(0.76) 322-348(1.17)                                                                                  |
| gnl UG Hs#S3619403  | 0.48 | 1 | 257-282(0.48)                                                                                                          |
| gnl UG Hs#S1729661  | 3.97 | 3 | 411-436(3.97) 570-595(2.23) 757-782(1.04)                                                                              |
| gnl UG Hs#S2294625  | 2.17 | 1 | 131-157(2.17)                                                                                                          |
| gnl UG Hs#S13588632 | 1.85 | 2 | 1966-1994(1.85) 2011-2037(0.76)                                                                                        |
| gnl UG Hs#S3993848  | 0.62 | 1 | 49-74(0.62)                                                                                                            |
| gnl UG Hs#S1727994  | 3.23 | 6 | 185-210(2.15) 466-491(2.20) 552-577(1.46) 643-668(0.89) 725-750(3.23) 990-1015(3.04)                                   |
| gnl UG Hs#S3219657  | 0.1  | 1 | 1839-1865(0.10)                                                                                                        |
| gnl UG Hs#S4631406  | 2.08 | 1 | 1447-1472(2.08)                                                                                                        |
| gnl UG Hs#S2139144  | 3    | 1 | 159-183(3.00)                                                                                                          |
| gnl UG Hs#S3219616  | 1.49 | 1 | 134-162(1.49)                                                                                                          |
| gnl UG Hs#S2139912  | 1.94 | 1 | 131-156(1.94)                                                                                                          |
| gnl UG Hs#S4820930  | 3.23 | 8 | 74-102(0.15) 413-438(0.13) 700-725(2.30) 940-966(1.76) 1259-1285(1.34) 1594-1621(0.45) 1714-1739(0.94) 2053-2081(3.23) |
| gnl UG Hs#S5978407  | 1.53 | 2 | 1478-1504(1.23) 1641-1666(1.53)                                                                                        |
| gnl UG Hs#S6664685  | 2.75 | 4 | 233-258(2.75) 1807-1832(0.72) 1837-1865(2.71) 1967-1991(1.28)                                                          |
| gnl UG Hs#S1731156  | 0.98 | 1 | 103-128(0.98)                                                                                                          |
| gnl UG Hs#S7111304  | 0.62 | 1 | 605-630(0.62)                                                                                                          |
| gnl UG Hs#S3988701  | 1.8  | 2 | 950-975(1.80) 1101-1126(1.56)                                                                                          |
| gnl UG Hs#S2293277  | 0.66 | 1 | 645-670(0.66)                                                                                                          |
| gnl UG Hs#S2140074  | 8.69 | 3 | 250-275(2.72) 589-614(1.46) 835-860(8.69)                                                                              |
| gnl UG Hs#S4826095  | 2.04 | 3 | 2087-2113(2.01) 2218-2246(0.16) 2894-2920(2.04)                                                                        |
| gnl UG Hs#S15633128 | 2.47 | 1 | 366-392(2.47)                                                                                                          |
| gnl UG Hs#S1824437  | 2.07 | 1 | 612-638(2.07)                                                                                                          |
| gnl UG Hs#S4045148  | 1.04 | 7 | 128-154(0.28) 223-250(0.39) 311-338(0.14) 354-381(0.17) 1443-1468(0.47) 1625-1650(0.89) 1870-1896(1.04)                |
| gnl UG Hs#S15639912 | 0.17 | 1 | 377-403(0.17)                                                                                                          |
| gnl UG Hs#S2140039  | 2.85 | 3 | 212-237(2.26) 298-323(2.85) 361-387(0.72)                                                                              |
| gnl UG Hs#S2293367  | 1.46 | 2 | 656-681(1.46) 882-907(0.40)                                                                                            |
| gnl UG Hs#S4840602  | 2.79 | 1 | 184-209(2.79)                                                                                                          |
| gnl UG Hs#S1731559  | 4.49 | 3 | 377-402(4.49) 814-839(0.53) 1037-1062(1.72)                                                                            |
| gnl UG Hs#S2140390  | 3.04 | 5 | 90-118(2.31) 189-214(0.29) 400-425(1.13) 680-705(3.04) 807-832(0.40)                                                   |
| gnl UG Hs#S1727979  | 0.13 | 2 | 664-690(0.13) 1148-1174(0.08)                                                                                          |
| gnl UG Hs#S4436076  | 5.13 | 6 | 972-997(5.13) 1092-1121(0.42) 1191-1216(0.98) 1225-1250(2.23) 1364-1388(3.29) 1854-1879(3.56)                          |
| gnl UG Hs#S14812321 | 2.26 | 4 | 843-868(2.26) 1201-1226(0.17) 1365-1390(0.04) 1754-1779(1.40)                                                          |

|                     |      |   |                                                                                               |
|---------------------|------|---|-----------------------------------------------------------------------------------------------|
| gnl UG Hs#S4435211  | 3.01 | 3 | 534-559(3.01) 574-599(0.11) 2010-2036(0.98)                                                   |
| gnl UG Hs#S1730542  | 2.14 | 3 | 879-904(2.14) 1695-1721(0.97) 1844-1869(1.26)                                                 |
| gnl UG Hs#S2139838  | 2.75 | 6 | 639-664(0.30) 1010-1035(0.11) 2287-2313(0.08) 2658-2683(0.40) 2730-2755(0.84) 3888-3911(2.75) |
| gnl UG Hs#S3601491  | 1.62 | 1 | 36-61(1.62)                                                                                   |
| gnl UG Hs#S4553574  | 2.39 | 1 | 170-195(2.39)                                                                                 |
| gnl UG Hs#S1728385  | 1.76 | 1 | 255-280(1.76)                                                                                 |
| gnl UG Hs#S1730124  | 3.69 | 1 | 443-469(3.69)                                                                                 |
| gnl UG Hs#S2140314  | 2.53 | 3 | 344-371(0.52) 781-806(1.68) 817-842(2.53)                                                     |
| gnl UG Hs#S3220035  | 1.04 | 2 | 2290-2316(0.73) 3152-3177(1.04)                                                               |
| gnl UG Hs#S1728811  | 0.82 | 1 | 579-604(0.82)                                                                                 |
| gnl UG Hs#S3220109  | 0.72 | 2 | 1327-1356(0.15) 2097-2122(0.72)                                                               |
| gnl UG Hs#S552705   | 0.07 | 1 | 1492-1517(0.07)                                                                               |
| gnl UG Hs#S4822044  | 1.63 | 1 | 819-844(1.63)                                                                                 |
| gnl UG Hs#S2294637  | 1.94 | 2 | 384-409(1.94) 757-781(0.41)                                                                   |
| gnl UG Hs#S1569788  | 1.98 | 1 | 92-117(1.98)                                                                                  |
| gnl UG Hs#S1730737  | 1.2  | 4 | 39-63(1.01) 255-280(1.20) 293-317(0.94) 519-544(1.18)                                         |
| gnl UG Hs#S2293877  | 0.08 | 1 | 126-154(0.08)                                                                                 |
| gnl UG Hs#S3438911  | 1.4  | 2 | 25-50(1.40) 52-77(0.19)                                                                       |
| gnl UG Hs#S3619285  | 0.17 | 1 | 26-52(0.17)                                                                                   |
| gnl UG Hs#S4826031  | 5.36 | 4 | 357-382(0.30) 880-905(5.36) 1917-1942(2.82) 2840-2865(0.40)                                   |
| gnl UG Hs#S2293832  | 2.07 | 1 | 48-73(2.07)                                                                                   |
| gnl UG Hs#S5860343  | 0.91 | 2 | 887-915(0.91) 2452-2477(0.72)                                                                 |
| gnl UG Hs#S4046161  | 1.61 | 2 | 556-584(0.55) 1126-1151(1.61)                                                                 |
| gnl UG Hs#S7111489  | 1.04 | 1 | 582-607(1.04)                                                                                 |
| gnl UG Hs#S3619132  | 0.65 | 1 | 152-177(0.65)                                                                                 |
| gnl UG Hs#S2293485  | 1.5  | 1 | 662-687(1.50)                                                                                 |
| gnl UG Hs#S1731336  | 2.07 | 3 | 195-223(2.07) 412-438(2.01) 711-734(0.08)                                                     |
| gnl UG Hs#S10831737 | 2.26 | 2 | 1145-1173(1.59) 1180-1205(2.26)                                                               |
| gnl UG Hs#S4822928  | 1.81 | 2 | 1238-1263(1.76) 3243-3269(1.81)                                                               |
| gnl UG Hs#S1732435  | 1.92 | 3 | 276-303(0.65) 1122-1147(1.32) 2523-2551(1.92)                                                 |
| gnl UG Hs#S5978473  | 1.05 | 1 | 473-499(1.05)                                                                                 |
| gnl UG Hs#S3219052  | 0.76 | 1 | 34-60(0.76)                                                                                   |
| gnl UG Hs#S4396089  | 0.07 | 1 | 65-91(0.07)                                                                                   |
| gnl UG Hs#S4814236  | 0.89 | 1 | 1526-1552(0.89)                                                                               |
| gnl UG Hs#S4553473  | 0.4  | 1 | 280-305(0.40)                                                                                 |
| gnl UG Hs#S3826043  | 0.4  | 1 | 570-598(0.40)                                                                                 |
| gnl UG Hs#S1730238  | 0.04 | 1 | 182-207(0.04)                                                                                 |
| gnl UG Hs#S417730   | 3.4  | 2 | 171-199(3.40) 294-319(0.72)                                                                   |
| gnl UG Hs#S2329654  | 0.2  | 1 | 887-913(0.20)                                                                                 |
| gnl UG Hs#S3603090  | 3.86 | 4 | 135-160(1.57) 423-451(0.44) 582-608(0.30) 766-792(3.86)                                       |
| gnl UG Hs#S4546202  | 2.62 | 3 | 420-446(0.11) 1415-1443(0.49) 1528-1556(2.62)                                                 |
| gnl UG Hs#S3218886  | 1.16 | 1 | 141-168(1.16)                                                                                 |
| gnl UG Hs#S3542659  | 2.3  | 2 | 432-457(2.30) 859-886(0.44)                                                                   |
| gnl UG Hs#S1726955  | 0.36 | 1 | 198-224(0.36)                                                                                 |
| gnl UG Hs#S2140047  | 1.84 | 2 | 36-66(0.62) 617-642(1.84)                                                                     |
| gnl UG Hs#S1730870  | 0.5  | 1 | 708-733(0.50)                                                                                 |
| gnl UG Hs#S4811236  | 2.67 | 1 | 332-358(2.67)                                                                                 |
| gnl UG Hs#S5860314  | 3.04 | 3 | 734-760(0.01) 940-965(0.84) 978-1003(3.04)                                                    |
| gnl UG Hs#S3601501  | 0.3  | 1 | 11-39(0.30)                                                                                   |
| gnl UG Hs#S4631519  | 3.04 | 6 | 259-284(0.08) 491-517(0.04) 1005-1033(0.87) 1177-1203(1.72) 1511-1537(0.94) 2106-2131(3.04)   |
| gnl UG Hs#S3547225  | 0.69 | 1 | 94-119(0.69)                                                                                  |
| gnl UG Hs#S3601566  | 2.2  | 1 | 1863-1889(2.20)                                                                               |
| gnl UG Hs#S3603205  | 2.36 | 2 | 76-101(2.36) 184-210(1.86)                                                                    |
| gnl UG Hs#S2138751  | 3.11 | 2 | 249-274(0.43) 1043-1068(3.11)                                                                 |

|                     |      |                                                                                                                           |
|---------------------|------|---------------------------------------------------------------------------------------------------------------------------|
| gnl UG Hs#S3619320  | 1.24 | 1 249-274(1.24)                                                                                                           |
| gnl UG Hs#S15631739 | 4.72 | 4 1047-1073(1.73) 1188-1211(2.11) 1998-2023(4.72) 2069-2095(1.34)                                                         |
| gnl UG Hs#S1726416  | 2.56 | 1 1508-1533(2.56)                                                                                                         |
| gnl UG Hs#S1729808  | 2.17 | 1 12-37(2.17)                                                                                                             |
| gnl UG Hs#S7111580  | 1.13 | 1 21-46(1.13)                                                                                                             |
| gnl UG Hs#S2138843  | 1.98 | 2 204-232(1.98) 503-528(0.98)                                                                                             |
| gnl UG Hs#S3619637  | 0.3  | 1 116-141(0.30)                                                                                                           |
| gnl UG Hs#S14802394 | 0.69 | 1 2244-2271(0.69)                                                                                                         |
| gnl UG Hs#S2294038  | 1.69 | 3 216-241(1.69) 290-315(0.30) 1437-1462(1.04)                                                                             |
| gnl UG Hs#S10832276 | 1.07 | 1 563-587(1.07)                                                                                                           |
| gnl UG Hs#S2329528  | 3.04 | 2 924-949(0.58) 1139-1164(3.04)                                                                                           |
| gnl UG Hs#S4824662  | 0.11 | 1 351-377(0.11)                                                                                                           |
| gnl UG Hs#S2140231  | 4.52 | 8 199-224(0.85) 293-320(0.30) 611-636(0.58) 847-875(2.15) 1333-1361(1.98) 1849-1877(4.52) 1975-2000(2.14) 2506-2532(1.76) |
| gnl UG Hs#S3219667  | 3.62 | 1 904-929(3.62)                                                                                                           |
| gnl UG Hs#S15730339 | 1.23 | 6 3-28(0.30) 54-80(0.84) 149-174(0.23) 1099-1123(1.23) 1186-1211(0.68) 1217-1241(0.22)                                    |
| gnl UG Hs#S3601593  | 1.36 | 1 525-551(1.36)                                                                                                           |
| gnl UG Hs#S1730027  | 2.23 | 4 478-504(0.12) 527-552(1.78) 669-696(0.13) 718-744(2.23)                                                                 |
| gnl UG Hs#S3220152  | 3.29 | 4 47-72(3.29) 85-108(1.66) 305-329(2.24) 532-560(2.81)                                                                    |
| gnl UG Hs#S1824517  | 2.75 | 5 198-223(0.55) 375-403(0.21) 699-724(1.90) 1343-1368(0.98) 1544-1569(2.75)                                               |
| gnl UG Hs#S4435721  | 2.62 | 3 147-172(2.62) 356-381(2.37) 662-688(1.91)                                                                               |
| gnl UG Hs#S3439957  | 0.07 | 1 638-663(0.07)                                                                                                           |
| gnl UG Hs#S4435539  | 0.72 | 2 839-865(0.72) 2525-2550(0.72)                                                                                           |
| gnl UG Hs#S3219459  | 0.17 | 1 370-396(0.17)                                                                                                           |
| gnl UG Hs#S4284544  | 0.2  | 1 880-905(0.20)                                                                                                           |
| gnl UG Hs#S4808751  | 2.23 | 1 773-801(2.23)                                                                                                           |
| gnl UG Hs#S5978587  | 0.97 | 1 174-199(0.97)                                                                                                           |
| gnl UG Hs#S1726465  | 7.14 | 2 287-313(7.14) 705-731(1.30)                                                                                             |
| gnl UG Hs#S15634633 | 0.08 | 1 247-272(0.08)                                                                                                           |
| gnl UG Hs#S10831468 | 2.5  | 1 297-323(2.50)                                                                                                           |
| gnl UG Hs#S3219603  | 1.62 | 3 27-52(0.20) 177-202(1.62) 343-368(0.23)                                                                                 |
| gnl UG Hs#S4044808  | 1.13 | 3 905-932(0.76) 1193-1220(1.13) 1489-1515(0.36)                                                                           |
| gnl UG Hs#S4620170  | 1.08 | 1 966-992(1.08)                                                                                                           |
| gnl UG Hs#S2139619  | 1.58 | 2 1152-1177(1.58) 2502-2528(0.69)                                                                                         |
| gnl UG Hs#S2140647  | 0.65 | 1 425-450(0.65)                                                                                                           |
| gnl UG Hs#S4284721  | 0.76 | 1 97-122(0.76)                                                                                                            |
| gnl UG Hs#S1726995  | 1.89 | 2 216-241(0.19) 318-343(1.89)                                                                                             |
| gnl UG Hs#S2649428  | 1.09 | 1 55-81(1.09)                                                                                                             |
| gnl UG Hs#S3880635  | 2.47 | 1 1710-1735(2.47)                                                                                                         |
| gnl UG Hs#S2294244  | 1.4  | 1 1100-1125(1.40)                                                                                                         |
| gnl UG Hs#S3619736  | 0.04 | 1 376-402(0.04)                                                                                                           |
| gnl UG Hs#S4623470  | 1.62 | 1 1070-1095(1.62)                                                                                                         |
| gnl UG Hs#S1726615  | 4.39 | 4 290-318(4.39) 670-695(1.94) 849-876(0.16) 1178-1203(1.07)                                                               |
| gnl UG Hs#S1728509  | 1.62 | 1 505-530(1.62)                                                                                                           |
| gnl UG Hs#S4811239  | 1.63 | 4 1663-1689(0.69) 1799-1823(0.11) 2235-2260(1.63) 2418-2443(0.46)                                                         |
| gnl UG Hs#S2293978  | 2.33 | 7 392-421(0.30) 1422-1447(0.17) 1541-1567(1.50) 1586-1613(0.65) 1794-1819(0.40) 1854-1879(0.87) 1946-1972(2.33)           |
| gnl UG Hs#S3987128  | 0.75 | 1 1958-1983(0.75)                                                                                                         |
| gnl UG Hs#S2139675  | 2.6  | 4 1326-1351(1.78) 1737-1763(2.60) 1965-1992(0.39) 1998-2024(0.72)                                                         |
| gnl UG Hs#S15637704 | 1.98 | 3 336-361(0.29) 423-448(0.41) 605-631(1.98)                                                                               |
| gnl UG Hs#S2140435  | 0.81 | 1 154-182(0.81)                                                                                                           |
| gnl UG Hs#S3438527  | 3.08 | 2 278-304(3.08) 419-447(0.40)                                                                                             |
| gnl UG Hs#S4621595  | 2.52 | 2 53-78(1.46) 1373-1401(2.52)                                                                                             |
| gnl UG Hs#S4818576  | 2.88 | 2 329-357(1.33) 564-592(2.88)                                                                                             |
| gnl UG Hs#S3603864  | 2.08 | 4 835-861(0.79) 1092-1118(1.30) 1127-1153(2.08) 1251-1277(0.50)                                                           |
| gnl UG Hs#S4545972  | 2.82 | 5 42-67(1.68) 119-144(0.14) 701-729(0.38) 745-771(2.82) 868-896(1.59)                                                     |

|                     |      |    |                                                                                                                                                                                         |
|---------------------|------|----|-----------------------------------------------------------------------------------------------------------------------------------------------------------------------------------------|
| gnl UG Hs#S1730753  | 0.45 | 1  | 176-204(0.45)                                                                                                                                                                           |
| gnl UG Hs#S2293317  | 0.58 | 1  | 2-28(0.58)                                                                                                                                                                              |
| gnl UG Hs#S2294647  | 3.92 | 10 | 170-196(2.08) 398-423(0.52) 757-782(0.46) 1369-1395(1.74) 1468-1493(3.40) 2303-2329(1.88) 2348-2373(1.07) 2472-2497(2.17) 2738-2763(3.92) 2831-2857(0.93)                               |
| gnl UG Hs#S4617512  | 0.66 | 2  | 812-840(0.17) 856-882(0.66)                                                                                                                                                             |
| gnl UG Hs#S1727209  | 0.59 | 1  | 186-211(0.59)                                                                                                                                                                           |
| gnl UG Hs#S1730981  | 0.26 | 1  | 380-405(0.26)                                                                                                                                                                           |
| gnl UG Hs#S1726744  | 0.91 | 1  | 1659-1684(0.91)                                                                                                                                                                         |
| gnl UG Hs#S2139495  | 1.5  | 3  | 523-549(0.04) 1187-1212(1.50) 3021-3047(0.36)                                                                                                                                           |
| gnl UG Hs#S4840963  | 2.02 | 4  | 66-91(2.02) 308-333(0.72) 469-494(0.65) 1136-1162(0.30)                                                                                                                                 |
| gnl UG Hs#S1729330  | 0.69 | 1  | 201-227(0.69)                                                                                                                                                                           |
| gnl UG Hs#S1728626  | 2.07 | 2  | 196-221(2.07) 425-450(0.30)                                                                                                                                                             |
| gnl UG Hs#S2294509  | 0.07 | 1  | 161-189(0.07)                                                                                                                                                                           |
| gnl UG Hs#S3619235  | 0.65 | 1  | 111-136(0.65)                                                                                                                                                                           |
| gnl UG Hs#S3322139  | 1.26 | 1  | 138-163(1.26)                                                                                                                                                                           |
| gnl UG Hs#S2138741  | 3.04 | 5  | 490-515(2.98) 1091-1116(3.04) 1655-1680(0.84) 2627-2653(0.24) 3192-3217(2.58)                                                                                                           |
| gnl UG Hs#S1731749  | 3.23 | 4  | 129-154(1.40) 501-526(0.98) 545-571(3.23) 624-651(2.06)                                                                                                                                 |
| gnl UG Hs#S3603840  | 3.52 | 1  | 324-349(3.52)                                                                                                                                                                           |
| gnl UG Hs#S1727874  | 0.68 | 1  | 1535-1561(0.68)                                                                                                                                                                         |
| gnl UG Hs#S5979265  | 2.34 | 5  | 1380-1408(0.30) 1580-1605(1.98) 2652-2677(0.08) 3104-3129(0.58) 3850-3876(2.34)                                                                                                         |
| gnl UG Hs#S2139391  | 0.97 | 1  | 594-622(0.97)                                                                                                                                                                           |
| gnl UG Hs#S1727276  | 0.3  | 1  | 1057-1082(0.30)                                                                                                                                                                         |
| gnl UG Hs#S4554585  | 0.63 | 3  | 767-792(0.63) 823-846(0.49) 920-946(0.59)                                                                                                                                               |
| gnl UG Hs#S4616718  | 0.8  | 1  | 1385-1410(0.80)                                                                                                                                                                         |
| gnl UG Hs#S4822794  | 5.59 | 9  | 955-980(5.40) 1009-1034(5.26) 1643-1668(1.17) 2038-2067(1.81) 2157-2182(0.72) 2578-2603(1.04) 2944-2969(0.68) 3096-3124(1.07) 3248-3274(5.59)                                           |
| gnl UG Hs#S4825815  | 6.74 | 12 | 331-356(0.17) 1433-1458(2.10) 1490-1518(1.04) 1676-1704(0.56) 1745-1770(0.39) 2942-2968(1.49) 4038-4063(1.20) 4836-4860(1.58) 5332-5357(6.74) 5418-5443(0.17) 5568-5594(3.17) 6766-6791 |
| gnl UG Hs#S4613772  | 2.23 | 1  | 78-103(2.23)                                                                                                                                                                            |
| gnl UG Hs#S10831567 | 2.88 | 1  | 651-676(2.88)                                                                                                                                                                           |
| gnl UG Hs#S3619670  | 1.26 | 8  | 692-717(0.82) 2696-2724(0.81) 3102-3127(0.81) 5222-5247(0.98) 6135-6160(0.91) 6400-6425(1.26) 8031-8059(0.12) 8111-8136(0.52)                                                           |
| gnl UG Hs#S7112150  | 1.87 | 4  | 1164-1190(0.76) 1707-1731(1.87) 1742-1768(0.94) 1957-1982(1.14)                                                                                                                         |
| gnl UG Hs#S4813991  | 2.5  | 1  | 719-744(2.50)                                                                                                                                                                           |
| gnl UG Hs#S5978488  | 2.14 | 1  | 1937-1961(2.14)                                                                                                                                                                         |
| gnl UG Hs#S5978509  | 1.25 | 1  | 2052-2080(1.25)                                                                                                                                                                         |
| gnl UG Hs#S3438756  | 2.33 | 1  | 221-246(2.33)                                                                                                                                                                           |
| gnl UG Hs#S2140059  | 6.39 | 4  | 1224-1249(2.29) 1396-1423(6.39) 1441-1468(3.77) 1483-1510(0.07)                                                                                                                         |
| gnl UG Hs#S15639554 | 0.63 | 2  | 812-837(0.63) 1167-1192(0.36)                                                                                                                                                           |
| gnl UG Hs#S4831156  | 1.04 | 1  | 192-218(1.04)                                                                                                                                                                           |
| gnl UG Hs#S2139137  | 0.34 | 1  | 1103-1128(0.34)                                                                                                                                                                         |
| gnl UG Hs#S2294047  | 0.72 | 1  | 870-895(0.72)                                                                                                                                                                           |
| gnl UG Hs#S4807666  | 2.04 | 2  | 342-367(1.07) 592-618(2.04)                                                                                                                                                             |
| gnl UG Hs#S3987557  | 0.92 | 1  | 656-681(0.92)                                                                                                                                                                           |
| gnl UG Hs#S1729699  | 2.39 | 4  | 2949-2975(2.39) 3108-3135(0.11) 3957-3983(0.62) 3990-4016(0.26)                                                                                                                         |
| gnl UG Hs#S1728683  | 3.3  | 2  | 104-129(0.20) 238-263(3.30)                                                                                                                                                             |
| gnl UG Hs#S3355505  | 0.59 | 1  | 1510-1536(0.59)                                                                                                                                                                         |
| gnl UG Hs#S5978411  | 0.23 | 1  | 1257-1283(0.23)                                                                                                                                                                         |
| gnl UG Hs#S1726288  | 2.18 | 3  | 1835-1860(0.24) 2070-2095(0.72) 2228-2254(2.18)                                                                                                                                         |
| gnl UG Hs#S3905630  | 2.56 | 2  | 1287-1312(1.13) 1403-1429(2.56)                                                                                                                                                         |
| gnl UG Hs#S2140011  | 0.36 | 1  | 53-78(0.36)                                                                                                                                                                             |
| gnl UG Hs#S4617771  | 1.4  | 1  | 120-145(1.40)                                                                                                                                                                           |
| gnl UG Hs#S5979203  | 2.17 | 3  | 654-680(0.89) 732-757(0.08) 770-796(2.17)                                                                                                                                               |
| gnl UG Hs#S1732355  | 1.57 | 1  | 534-559(1.57)                                                                                                                                                                           |
| gnl UG Hs#S3219210  | 2.79 | 1  | 184-209(2.79)                                                                                                                                                                           |
| gnl UG Hs#S1730959  | 2.32 | 2  | 169-195(2.32) 303-329(1.40)                                                                                                                                                             |
| gnl UG Hs#S1730297  | 0.79 | 1  | 465-490(0.79)                                                                                                                                                                           |
| gnl UG Hs#S5930942  | 2.75 | 2  | 2716-2741(2.75) 3112-3137(0.43)                                                                                                                                                         |

|                     |      |    |                                                                                                                                                             |
|---------------------|------|----|-------------------------------------------------------------------------------------------------------------------------------------------------------------|
| gnl UG Hs#S4553802  | 0.14 | 1  | 286-312(0.14)                                                                                                                                               |
| gnl UG Hs#S3438810  | 0.14 | 1  | 280-305(0.14)                                                                                                                                               |
| gnl UG Hs#S3619362  | 0.72 | 1  | 216-242(0.72)                                                                                                                                               |
| gnl UG Hs#S1731119  | 5.05 | 3  | 446-471(5.05) 1375-1400(1.84) 2479-2504(1.30)                                                                                                               |
| gnl UG Hs#S4435930  | 1.89 | 2  | 769-794(1.89) 1199-1224(1.14)                                                                                                                               |
| gnl UG Hs#S3218959  | 1.07 | 1  | 975-1003(1.07)                                                                                                                                              |
| gnl UG Hs#S1729640  | 1.21 | 1  | 460-485(1.21)                                                                                                                                               |
| gnl UG Hs#S2293164  | 1.69 | 1  | 50-75(1.69)                                                                                                                                                 |
| gnl UG Hs#S1730264  | 0.91 | 3  | 41-71(0.06) 286-311(0.91) 431-457(0.17)                                                                                                                     |
| gnl UG Hs#S2294329  | 2.92 | 2  | 813-838(0.94) 917-943(2.92)                                                                                                                                 |
| gnl UG Hs#S3940101  | 0.01 | 1  | 364-392(0.01)                                                                                                                                               |
| gnl UG Hs#S4811554  | 4.7  | 1  | 320-345(4.70)                                                                                                                                               |
| gnl UG Hs#S3219116  | 1.89 | 2  | 116-141(0.81) 207-233(1.89)                                                                                                                                 |
| gnl UG Hs#S3781824  | 0.65 | 2  | 385-413(0.49) 438-463(0.65)                                                                                                                                 |
| gnl UG Hs#S1730538  | 4.21 | 5  | 182-207(4.21) 311-336(0.04) 1270-1296(0.04) 1476-1503(1.07) 1990-2015(1.30)                                                                                 |
| gnl UG Hs#S3972985  | 1.96 | 2  | 174-199(0.79) 528-553(1.96)                                                                                                                                 |
| gnl UG Hs#S1731394  | 1.69 | 4  | 139-164(0.40) 165-191(0.27) 405-430(0.35) 906-932(1.69)                                                                                                     |
| gnl UG Hs#S1727074  | 2.13 | 1  | 4-29(2.13)                                                                                                                                                  |
| gnl UG Hs#S1726411  | 0.3  | 1  | 164-192(0.30)                                                                                                                                               |
| gnl UG Hs#S3601687  | 1.04 | 1  | 66-91(1.04)                                                                                                                                                 |
| gnl UG Hs#S3825992  | 3.08 | 2  | 359-386(3.08) 953-978(2.74)                                                                                                                                 |
| gnl UG Hs#S1263773  | 1.53 | 5  | 118-144(1.53) 261-286(1.10) 553-580(1.24) 862-887(1.50) 2032-2057(1.40)                                                                                     |
| gnl UG Hs#S7111003  | 0.65 | 1  | 42-68(0.65)                                                                                                                                                 |
| gnl UG Hs#S1726399  | 3.04 | 8  | 301-326(0.26) 336-362(2.40) 829-854(1.94) 1454-1479(0.56) 1514-1537(0.07) 1784-1812(2.43) 4791-4816(3.04) 5246-5272(0.04)                                   |
| gnl UG Hs#S11590997 | 3.89 | 1  | 72-97(3.89)                                                                                                                                                 |
| gnl UG Hs#S3438952  | 2.08 | 1  | 79-105(2.08)                                                                                                                                                |
| gnl UG Hs#S1569765  | 0.46 | 1  | 1814-1839(0.46)                                                                                                                                             |
| gnl UG Hs#S1728698  | 0.94 | 1  | 1173-1198(0.94)                                                                                                                                             |
| gnl UG Hs#S4045141  | 3.04 | 10 | 221-246(0.04) 642-667(0.11) 724-750(2.94) 806-831(0.26) 1058-1083(3.04) 1095-1120(0.79) 1182-1208(0.26) 1385-1410(0.08) 1421-1446(0.84) 1472-1499(0.82)     |
| gnl UG Hs#S14812864 | 1.77 | 1  | 198-224(1.77)                                                                                                                                               |
| gnl UG Hs#S7110163  | 2.55 | 4  | 441-467(0.58) 767-792(1.30) 1125-1150(2.55) 1260-1285(2.20)                                                                                                 |
| gnl UG Hs#S4810462  | 0.2  | 1  | 2352-2377(0.20)                                                                                                                                             |
| gnl UG Hs#S15638189 | 0.81 | 1  | 706-731(0.81)                                                                                                                                               |
| gnl UG Hs#S3218997  | 0.72 | 1  | 130-155(0.72)                                                                                                                                               |
| gnl UG Hs#S4822332  | 2.53 | 5  | 237-261(0.19) 361-384(0.98) 640-665(2.53) 672-701(0.37) 1619-1645(0.57)                                                                                     |
| gnl UG Hs#S3988470  | 2.13 | 2  | 383-408(0.07) 1083-1108(2.13)                                                                                                                               |
| gnl UG Hs#S1731504  | 0.08 | 1  | 368-394(0.08)                                                                                                                                               |
| gnl UG Hs#S4817813  | 0.91 | 1  | 458-484(0.91)                                                                                                                                               |
| gnl UG Hs#S1730993  | 3.11 | 4  | 1073-1098(0.91) 2289-2315(0.17) 2998-3027(1.24) 4274-4299(3.11)                                                                                             |
| gnl UG Hs#S2293190  | 0.11 | 1  | 1965-1991(0.11)                                                                                                                                             |
| gnl UG Hs#S1731908  | 3.5  | 1  | 402-427(3.50)                                                                                                                                               |
| gnl UG Hs#S4820012  | 1.68 | 2  | 538-563(1.68) 3257-3282(0.75)                                                                                                                               |
| gnl UG Hs#S1729587  | 0.52 | 1  | 694-722(0.52)                                                                                                                                               |
| gnl UG Hs#S3218876  | 4.96 | 10 | 299-325(0.17) 627-652(1.98) 1101-1126(4.96) 1176-1204(0.04) 1225-1250(0.04) 1503-1529(1.34) 1576-1602(2.17) 1882-1906(0.51) 1920-1945(2.11) 1970-1998(0.62) |
| gnl UG Hs#S1090762  | 1.46 | 1  | 903-928(1.46)                                                                                                                                               |
| gnl UG Hs#S4807885  | 1.34 | 2  | 319-345(1.34) 411-436(0.91)                                                                                                                                 |
| gnl UG Hs#S15644507 | 0.91 | 2  | 808-834(0.30) 1366-1391(0.91)                                                                                                                               |
| gnl UG Hs#S3438579  | 1.1  | 2  | 176-204(0.30) 327-350(1.10)                                                                                                                                 |
| gnl UG Hs#S2293239  | 5.14 | 5  | 14-39(4.70) 49-75(1.86) 394-418(0.03) 676-701(0.53) 1041-1066(5.14)                                                                                         |
| gnl UG Hs#S1728219  | 0.3  | 1  | 56-84(0.30)                                                                                                                                                 |
| gnl UG Hs#S4396111  | 1.15 | 2  | 157-182(0.94) 598-626(1.15)                                                                                                                                 |
| gnl UG Hs#S1731771  | 1.57 | 2  | 319-344(1.57) 449-472(1.07)                                                                                                                                 |
| gnl UG Hs#S1971606  | 1.75 | 2  | 96-121(1.75) 229-254(0.67)                                                                                                                                  |
| gnl UG Hs#S2139482  | 3.67 | 5  | 37-63(0.55) 80-106(0.91) 616-641(0.91) 1177-1202(3.67) 1853-1878(2.17)                                                                                      |



|                     |      |                                                                                                                                                                  |
|---------------------|------|------------------------------------------------------------------------------------------------------------------------------------------------------------------|
| gnl UG Hs#S3619272  | 3.3  | 2 233-258(3.30) 314-339(0.40)                                                                                                                                    |
| gnl UG Hs#S1731782  | 2.21 | 1 174-200(2.21)                                                                                                                                                  |
| gnl UG Hs#S2139861  | 2.3  | 1 510-535(2.30)                                                                                                                                                  |
| gnl UG Hs#S2293200  | 0.98 | 3 1023-1048(0.17) 1236-1262(0.52) 1812-1838(0.98)                                                                                                                |
| gnl UG Hs#S2138873  | 4.61 | 7 420-451(0.77) 1511-1538(1.53) 1831-1857(0.15) 2949-2974(2.04) 2998-3024(0.36) 3187-3212(4.61) 3240-3265(0.72)                                                  |
| gnl UG Hs#S4620579  | 1.62 | 2 207-230(1.62) 443-468(0.21)                                                                                                                                    |
| gnl UG Hs#S4621137  | 0.65 | 2 593-620(0.00) 1255-1280(0.65)                                                                                                                                  |
| gnl UG Hs#S4619629  | 2.6  | 1 609-635(2.60)                                                                                                                                                  |
| gnl UG Hs#S5978461  | 0.04 | 1 612-637(0.04)                                                                                                                                                  |
| gnl UG Hs#S2293270  | 0.04 | 1 477-502(0.04)                                                                                                                                                  |
| gnl UG Hs#S3940071  | 0.03 | 1 182-207(0.03)                                                                                                                                                  |
| gnl UG Hs#S1569555  | 0.13 | 1 316-341(0.13)                                                                                                                                                  |
| gnl UG Hs#S2138958  | 0.98 | 2 531-557(0.98) 2040-2068(0.30)                                                                                                                                  |
| gnl UG Hs#S1726372  | 3.04 | 1 12-40(3.04)                                                                                                                                                    |
| gnl UG Hs#S1730691  | 1.3  | 1 77-105(1.30)                                                                                                                                                   |
| gnl UG Hs#S3439466  | 1.3  | 1 2171-2196(1.30)                                                                                                                                                |
| gnl UG Hs#S2139298  | 0.11 | 1 363-389(0.11)                                                                                                                                                  |
| gnl UG Hs#S11046607 | 0.03 | 1 340-367(0.03)                                                                                                                                                  |
| gnl UG Hs#S3438936  | 2.07 | 1 575-600(2.07)                                                                                                                                                  |
| gnl UG Hs#S1727614  | 2.11 | 4 298-323(2.11) 400-426(0.69) 480-506(0.07) 630-656(1.53)                                                                                                        |
| gnl UG Hs#S1728680  | 2.91 | 3 117-142(2.91) 391-416(0.11) 551-577(0.11)                                                                                                                      |
| gnl UG Hs#S1728727  | 0.27 | 1 588-616(0.27)                                                                                                                                                  |
| gnl UG Hs#S4046157  | 2.89 | 5 608-634(2.38) 728-754(2.89) 908-935(1.56) 1030-1055(0.46) 1254-1280(1.82)                                                                                      |
| gnl UG Hs#S7113302  | 2.14 | 4 953-979(1.98) 1761-1789(2.14) 1858-1883(1.57) 1955-1980(0.81)                                                                                                  |
| gnl UG Hs#S2140723  | 2.17 | 1 173-201(2.17)                                                                                                                                                  |
| gnl UG Hs#S1728149  | 0.13 | 1 213-239(0.13)                                                                                                                                                  |
| gnl UG Hs#S1726531  | 5.95 | 2 95-120(5.95) 189-214(2.50)                                                                                                                                     |
| gnl UG Hs#S1731821  | 1.58 | 3 867-894(0.25) 1064-1092(0.16) 1161-1186(1.58)                                                                                                                  |
| gnl UG Hs#S5516762  | 0.82 | 2 134-160(0.82) 612-640(0.38)                                                                                                                                    |
| gnl UG Hs#S1726545  | 0.01 | 1 118-143(0.01)                                                                                                                                                  |
| gnl UG Hs#S4284741  | 1.94 | 1 222-247(1.94)                                                                                                                                                  |
| gnl UG Hs#S15639540 | 0.04 | 1 65-90(0.04)                                                                                                                                                    |
| gnl UG Hs#S1731601  | 3.91 | 2 29-54(0.45) 83-111(3.91)                                                                                                                                       |
| gnl UG Hs#S14802252 | 0.17 | 1 195-221(0.17)                                                                                                                                                  |
| gnl UG Hs#S1728384  | 0.5  | 1 760-785(0.50)                                                                                                                                                  |
| gnl UG Hs#S4815459  | 3.94 | 1 2238-2263(3.94)                                                                                                                                                |
| gnl UG Hs#S3438381  | 0.23 | 1 739-764(0.23)                                                                                                                                                  |
| gnl UG Hs#S1732317  | 1.98 | 8 54-79(0.72) 355-380(0.15) 558-583(1.98) 1015-1041(0.67) 1311-1336(0.40) 1578-1601(1.59) 1721-1747(0.50) 1860-1886(1.91)                                        |
| gnl UG Hs#S7110140  | 0.57 | 2 529-557(0.23) 1954-1979(0.57)                                                                                                                                  |
| gnl UG Hs#S2293932  | 1.39 | 3 759-784(1.39) 1330-1358(0.79) 2076-2103(1.07)                                                                                                                  |
| gnl UG Hs#S1972763  | 3.79 | 2 37-62(3.79) 2717-2743(0.46)                                                                                                                                    |
| gnl UG Hs#S3219182  | 2.46 | 1 400-425(2.46)                                                                                                                                                  |
| gnl UG Hs#S1731877  | 1.4  | 1 529-555(1.40)                                                                                                                                                  |
| gnl UG Hs#S7111993  | 1.07 | 1 1218-1243(1.07)                                                                                                                                                |
| gnl UG Hs#S15644064 | 2.87 | 10 271-296(1.89) 1400-1428(0.59) 1514-1542(1.52) 1568-1593(0.50) 1721-1746(2.62) 2233-2258(0.40) 2488-2515(1.27) 2948-2974(2.36) 3480-3505(0.62) 3543-3568(2.87) |
| gnl UG Hs#S2293915  | 2.01 | 2 376-401(0.30) 534-560(2.01)                                                                                                                                    |
| gnl UG Hs#S14902423 | 0.14 | 1 69-95(0.14)                                                                                                                                                    |
| gnl UG Hs#S14863780 | 2.59 | 1 259-285(2.59)                                                                                                                                                  |
| gnl UG Hs#S4814818  | 1.69 | 2 71-97(1.02) 388-414(1.69)                                                                                                                                      |
| gnl UG Hs#S4619579  | 1.47 | 1 1486-1513(1.47)                                                                                                                                                |
| gnl UG Hs#S2294390  | 0.89 | 1 681-707(0.89)                                                                                                                                                  |
| gnl UG Hs#S1729220  | 1.23 | 1 1342-1367(1.23)                                                                                                                                                |
| gnl UG Hs#S2139960  | 0.14 | 1 34-59(0.14)                                                                                                                                                    |
| gnl UG Hs#S4808730  | 1.59 | 1 92-120(1.59)                                                                                                                                                   |

|                     |      |                                                                                                                                           |
|---------------------|------|-------------------------------------------------------------------------------------------------------------------------------------------|
| gnl UG Hs#S3438723  | 1.13 | 1 70-95(1.13)                                                                                                                             |
| gnl UG Hs#S3219831  | 0.55 | 1 388-413(0.55)                                                                                                                           |
| gnl UG Hs#S2140290  | 3.4  | 3 207-233(0.47) 260-286(3.40) 534-561(0.33)                                                                                               |
| gnl UG Hs#S3601558  | 2.02 | 7 442-466(2.02) 503-528(1.43) 637-663(0.53) 952-978(0.49) 1274-1300(0.27) 1510-1534(0.67) 1903-1931(1.08)                                 |
| gnl UG Hs#S1727319  | 1.47 | 1 222-247(1.47)                                                                                                                           |
| gnl UG Hs#S4046400  | 0.88 | 7 363-389(0.30) 474-501(0.88) 1145-1171(0.24) 1492-1518(0.40) 1651-1677(0.82) 2056-2082(0.72) 2116-2142(0.04)                             |
| gnl UG Hs#S1729365  | 1.43 | 4 92-118(1.43) 367-392(0.40) 547-572(0.48) 669-697(0.49)                                                                                  |
| gnl UG Hs#S3322164  | 2.79 | 2 574-599(1.25) 765-790(2.79)                                                                                                             |
| gnl UG Hs#S5978454  | 2.5  | 2 285-311(2.50) 735-761(0.62)                                                                                                             |
| gnl UG Hs#S1731641  | 1.65 | 1 244-269(1.65)                                                                                                                           |
| gnl UG Hs#S15641235 | 0.62 | 1 108-133(0.62)                                                                                                                           |
| gnl UG Hs#S15631753 | 2.13 | 1 463-489(2.13)                                                                                                                           |
| gnl UG Hs#S1729359  | 4.52 | 3 170-198(4.52) 294-320(0.04) 425-451(3.27)                                                                                               |
| gnl UG Hs#S1731251  | 1.01 | 1 71-97(1.01)                                                                                                                             |
| gnl UG Hs#S2293928  | 3.73 | 5 338-364(3.08) 680-705(3.73) 1388-1411(1.17) 1743-1770(0.62) 1773-1802(1.37)                                                             |
| gnl UG Hs#S5978657  | 1.3  | 1 1045-1070(1.30)                                                                                                                         |
| gnl UG Hs#S1731480  | 2.63 | 1 361-386(2.63)                                                                                                                           |
| gnl UG Hs#S1728419  | 1.17 | 2 868-898(0.84) 931-956(1.17)                                                                                                             |
| gnl UG Hs#S3619226  | 3.05 | 1 426-452(3.05)                                                                                                                           |
| gnl UG Hs#S1730928  | 3.62 | 4 169-194(0.94) 1001-1029(1.88) 1113-1140(2.56) 1224-1249(3.62)                                                                           |
| gnl UG Hs#S3601649  | 4.4  | 4 266-291(1.94) 680-705(4.40) 972-997(2.43) 1064-1089(0.54)                                                                               |
| gnl UG Hs#S1730446  | 0.65 | 1 151-176(0.65)                                                                                                                           |
| gnl UG Hs#S3219734  | 0.72 | 1 350-375(0.72)                                                                                                                           |
| gnl UG Hs#S1726430  | 3.89 | 9 226-252(0.11) 255-284(1.97) 387-412(1.21) 343-370(0.65) 482-510(0.68) 1336-1361(2.04) 1529-1554(3.11) 1919-1944(3.89) 1966-1991(3.50)   |
| gnl UG Hs#S14802389 | 2.26 | 1 944-969(2.26)                                                                                                                           |
| gnl UG Hs#S4435556  | 0.14 | 1 258-283(0.14)                                                                                                                           |
| gnl UG Hs#S15636704 | 4.78 | 1 820-845(4.78)                                                                                                                           |
| gnl UG Hs#S6163424  | 2.47 | 7 797-822(0.40) 1272-1298(1.59) 1652-1676(0.15) 2487-2510(2.47) 2888-2914(1.62) 3053-3079(1.17) 3297-3322(0.04)                           |
| gnl UG Hs#S1728405  | 3.76 | 9 64-89(0.17) 123-149(3.76) 930-954(2.07) 1053-1078(0.30) 2640-2666(1.01) 3113-3141(0.10) 3425-3450(3.04) 3607-3635(0.07) 3849-3874(1.62) |
| gnl UG Hs#S4813383  | 3.23 | 2 2619-2644(3.23) 2706-2734(0.41)                                                                                                         |
| gnl UG Hs#S3218960  | 2.83 | 4 159-185(2.33) 221-247(0.76) 277-302(2.79) 503-532(2.83)                                                                                 |
| gnl UG Hs#S3619243  | 2.05 | 2 1048-1073(0.11) 1296-1323(2.05)                                                                                                         |
| gnl UG Hs#S15643589 | 0.17 | 1 32-60(0.17)                                                                                                                             |
| gnl UG Hs#S1730733  | 0.47 | 2 31-57(0.47) 795-820(0.08)                                                                                                               |
| gnl UG Hs#S2293550  | 4.57 | 1 25-50(4.57)                                                                                                                             |
| gnl UG Hs#S4823963  | 0.07 | 1 65-91(0.07)                                                                                                                             |
| gnl UG Hs#S4554634  | 0.76 | 1 1412-1438(0.76)                                                                                                                         |
| gnl UG Hs#S15643139 | 0.69 | 2 287-313(0.69) 582-609(0.44)                                                                                                             |
| gnl UG Hs#S5495034  | 2.17 | 1 158-183(2.17)                                                                                                                           |
| gnl UG Hs#S7110197  | 1.32 | 3 894-919(1.32) 1108-1134(0.50) 1408-1436(0.16)                                                                                           |
| gnl UG Hs#S1729477  | 3.59 | 4 772-797(0.33) 1221-1247(1.36) 1314-1337(3.59) 1414-1438(0.04)                                                                           |
| gnl UG Hs#S2294258  | 0.58 | 1 964-990(0.58)                                                                                                                           |
| gnl UG Hs#S5930972  | 1.04 | 1 499-525(1.04)                                                                                                                           |
| gnl UG Hs#S2139251  | 3.3  | 2 342-368(3.30) 2186-2211(0.08)                                                                                                           |
| gnl UG Hs#S1729708  | 2.08 | 1 488-514(2.08)                                                                                                                           |
| gnl UG Hs#S1824463  | 0.31 | 1 39-65(0.31)                                                                                                                             |
| gnl UG Hs#S4820059  | 1.74 | 1 881-905(1.74)                                                                                                                           |
| gnl UG Hs#S2139208  | 1.15 | 1 445-470(1.15)                                                                                                                           |
| gnl UG Hs#S14273369 | 1.06 | 1 875-898(1.06)                                                                                                                           |
| gnl UG Hs#S3219024  | 0.79 | 2 285-311(0.01) 329-354(0.79)                                                                                                             |
| gnl UG Hs#S1730370  | 3.75 | 1 235-263(3.75)                                                                                                                           |
| gnl UG Hs#S6159082  | 1.68 | 3 1488-1511(0.51) 1541-1567(1.34) 2009-2036(1.68)                                                                                         |
| gnl UG Hs#S3220218  | 4.93 | 1 836-861(4.93)                                                                                                                           |
| gnl UG Hs#S1729752  | 2.15 | 2 1-26(1.53) 385-411(2.15)                                                                                                                |

|                     |      |    |                                                                                                                                                                             |
|---------------------|------|----|-----------------------------------------------------------------------------------------------------------------------------------------------------------------------------|
| gnl UG Hs#S3219157  | 1.62 | 2  | 921-946(1.62) 1221-1246(1.13)                                                                                                                                               |
| gnl UG Hs#S2138924  | 5.41 | 3  | 135-162(0.71) 831-858(0.87) 886-913(5.41)                                                                                                                                   |
| gnl UG Hs#S4630979  | 0.33 | 1  | 802-830(0.33)                                                                                                                                                               |
| gnl UG Hs#S1727336  | 3.89 | 6  | 5-31(0.75) 99-122(2.24) 281-307(0.20) 444-469(3.89) 497-522(3.30) 644-669(0.47)                                                                                             |
| gnl UG Hs#S1730094  | 0.86 | 2  | 352-377(0.39) 379-405(0.86)                                                                                                                                                 |
| gnl UG Hs#S14802643 | 2.67 | 5  | 693-718(0.17) 967-992(1.04) 1005-1030(1.04) 1342-1367(2.67) 2497-2522(0.40)                                                                                                 |
| gnl UG Hs#S3219673  | 2.3  | 3  | 490-516(0.01) 538-564(0.72) 604-630(2.30)                                                                                                                                   |
| gnl UG Hs#S1729751  | 0.76 | 1  | 479-504(0.76)                                                                                                                                                               |
| gnl UG Hs#S1728911  | 2.4  | 1  | 107-133(2.40)                                                                                                                                                               |
| gnl UG Hs#S3438984  | 5.53 | 3  | 1212-1240(0.81) 1307-1332(5.53) 1352-1377(0.62)                                                                                                                             |
| gnl UG Hs#S15898584 | 1.65 | 2  | 228-253(1.65) 291-317(0.04)                                                                                                                                                 |
| gnl UG Hs#S2139026  | 4.11 | 1  | 66-91(4.11)                                                                                                                                                                 |
| gnl UG Hs#S14812596 | 0.07 | 1  | 1021-1049(0.07)                                                                                                                                                             |
| gnl UG Hs#S3601668  | 1.04 | 1  | 277-302(1.04)                                                                                                                                                               |
| gnl UG Hs#S1728836  | 0.99 | 1  | 50-75(0.99)                                                                                                                                                                 |
| gnl UG Hs#S3438409  | 4.62 | 1  | 179-204(4.62)                                                                                                                                                               |
| gnl UG Hs#S4435925  | 4.82 | 9  | 84-110(1.23) 260-286(1.11) 371-396(0.07) 429-453(2.66) 563-589(1.33) 767-793(4.82) 1363-1390(0.84) 1828-1851(1.54) 1955-1981(1.17)                                          |
| gnl UG Hs#S2293675  | 0.17 | 1  | 382-405(0.17)                                                                                                                                                               |
| gnl UG Hs#S15639201 | 2.62 | 3  | 607-632(1.26) 769-794(1.98) 1010-1038(2.62)                                                                                                                                 |
| gnl UG Hs#S4830218  | 2.52 | 6  | 344-370(0.17) 441-466(1.20) 1239-1265(2.17) 1345-1370(2.30) 1533-1559(0.01) 1806-1834(2.52)                                                                                 |
| gnl UG Hs#S15846839 | 1.58 | 1  | 935-961(1.58)                                                                                                                                                               |
| gnl UG Hs#S2293348  | 1.33 | 1  | 838-863(1.33)                                                                                                                                                               |
| gnl UG Hs#S4810416  | 2.3  | 2  | 944-969(0.23) 1783-1811(2.30)                                                                                                                                               |
| gnl UG Hs#S2139520  | 4.39 | 11 | 318-343(4.39) 285-310(0.01) 1021-1044(1.62) 1550-1577(0.03) 1764-1792(0.50) 2529-2554(2.79) 2660-2685(0.20) 3024-3049(0.23) 3729-3755(0.08) 4495-4519(1.80) 4854-4882(2.55) |
| gnl UG Hs#S1728364  | 3.38 | 1  | 29-56(3.38)                                                                                                                                                                 |
| gnl UG Hs#S5978526  | 3.72 | 1  | 59-85(3.72)                                                                                                                                                                 |
| gnl UG Hs#S2294168  | 1.28 | 3  | 236-264(0.00) 758-781(1.28) 985-1011(0.08)                                                                                                                                  |
| gnl UG Hs#S4554619  | 2.76 | 1  | 60-85(2.76)                                                                                                                                                                 |
| gnl UG Hs#S1730327  | 6.46 | 6  | 41-69(0.81) 554-582(2.62) 867-892(6.46) 921-947(0.71) 963-988(2.10) 1007-1032(0.89)                                                                                         |
| gnl UG Hs#S816459   | 6.14 | 2  | 151-176(6.14) 896-924(2.40)                                                                                                                                                 |
| gnl UG Hs#S1730481  | 3.72 | 4  | 2206-2231(1.58) 2272-2297(0.65) 2507-2532(3.72) 2551-2576(1.40)                                                                                                             |
| gnl UG Hs#S2139276  | 3.57 | 5  | 300-325(3.57) 619-644(0.72) 729-754(0.94) 939-965(2.27) 1054-1079(0.62)                                                                                                     |
| gnl UG Hs#S4807657  | 0.88 | 1  | 17-45(0.88)                                                                                                                                                                 |
| gnl UG Hs#S12744030 | 2.81 | 1  | 243-271(2.81)                                                                                                                                                               |
| gnl UG Hs#S2140147  | 2.72 | 2  | 366-391(0.08) 571-597(2.72)                                                                                                                                                 |
| gnl UG Hs#S15631719 | 0.3  | 1  | 1081-1106(0.30)                                                                                                                                                             |
| gnl UG Hs#S3219867  | 0.5  | 1  | 223-248(0.50)                                                                                                                                                               |
| gnl UG Hs#S11047213 | 3.97 | 7  | 36-64(2.08) 840-865(0.53) 913-938(2.89) 1333-1358(3.52) 1538-1564(0.30) 1566-1591(3.97) 1845-1869(2.94)                                                                     |
| gnl UG Hs#S1731174  | 0.76 | 2  | 222-248(0.66) 508-535(0.76)                                                                                                                                                 |
| gnl UG Hs#S4545973  | 0.17 | 1  | 1255-1281(0.17)                                                                                                                                                             |
| gnl UG Hs#S4826230  | 3.23 | 7  | 287-315(0.04) 594-620(3.23) 2065-2090(1.72) 2288-2314(0.17) 2469-2495(1.76) 2867-2892(3.04) 2921-2947(1.79)                                                                 |
| gnl UG Hs#S1727925  | 4.2  | 1  | 292-320(4.20)                                                                                                                                                               |
| gnl UG Hs#S4046181  | 0.81 | 1  | 469-497(0.81)                                                                                                                                                               |
| gnl UG Hs#S2139692  | 1.53 | 2  | 138-162(0.59) 191-214(1.53)                                                                                                                                                 |
| gnl UG Hs#S1731742  | 1.69 | 2  | 234-260(1.69) 375-401(0.02)                                                                                                                                                 |
| gnl UG Hs#S5517587  | 1.67 | 2  | 158-183(1.67) 422-449(1.48)                                                                                                                                                 |
| gnl UG Hs#S3438558  | 4.8  | 5  | 368-394(2.04) 668-695(0.50) 1211-1235(4.80) 1898-1923(0.40) 1938-1962(2.04)                                                                                                 |
| gnl UG Hs#S1728175  | 1.37 | 1  | 812-838(1.37)                                                                                                                                                               |
| gnl UG Hs#S4813839  | 3.68 | 1  | 2035-2061(3.68)                                                                                                                                                             |
| gnl UG Hs#S1732460  | 0.49 | 1  | 1020-1048(0.49)                                                                                                                                                             |
| gnl UG Hs#S3619144  | 3.13 | 1  | 327-355(3.13)                                                                                                                                                               |
| gnl UG Hs#S1731128  | 0.2  | 1  | 80-105(0.20)                                                                                                                                                                |
| gnl UG Hs#S15631525 | 2.56 | 1  | 517-543(2.56)                                                                                                                                                               |
| gnl UG Hs#S2294487  | 2.24 | 2  | 335-363(2.24) 405-430(0.97)                                                                                                                                                 |

|                     |      |    |                                                                                                                                                           |
|---------------------|------|----|-----------------------------------------------------------------------------------------------------------------------------------------------------------|
| gnl UG Hs#S3803667  | 0.69 | 1  | 208-234(0.69)                                                                                                                                             |
| gnl UG Hs#S1726226  | 1.68 | 3  | 222-246(1.68) 825-849(0.52) 1165-1193(0.04)                                                                                                               |
| gnl UG Hs#S14802698 | 2.62 | 5  | 257-285(0.21) 457-480(2.62) 1081-1106(0.91) 1563-1592(0.06) 2132-2156(0.20)                                                                               |
| gnl UG Hs#S4813350  | 0.5  | 3  | 75-101(0.50) 228-256(0.08) 366-393(0.39)                                                                                                                  |
| gnl UG Hs#S10831847 | 1.68 | 3  | 2820-2846(1.57) 3164-3190(0.59) 3791-3816(1.68)                                                                                                           |
| gnl UG Hs#S5979260  | 1.44 | 7  | 243-268(1.07) 384-411(1.44) 471-496(0.65) 692-717(0.98) 748-773(1.26) 1144-1168(0.84) 1240-1266(1.17)                                                     |
| gnl UG Hs#S11590892 | 0.1  | 1  | 193-220(0.10)                                                                                                                                             |
| gnl UG Hs#S1728171  | 0.62 | 2  | 378-403(0.57) 409-432(0.62)                                                                                                                               |
| gnl UG Hs#S4553573  | 1.89 | 4  | 2-28(0.72) 749-774(1.89) 1158-1184(0.46) 1754-1782(1.78)                                                                                                  |
| gnl UG Hs#S4631495  | 1.34 | 3  | 162-187(0.30) 709-735(0.79) 1133-1159(1.34)                                                                                                               |
| gnl UG Hs#S15632017 | 1.3  | 1  | 380-403(1.30)                                                                                                                                             |
| gnl UG Hs#S3601710  | 5.11 | 3  | 87-112(5.11) 1453-1478(1.30) 1587-1612(0.79)                                                                                                              |
| gnl UG Hs#S2293199  | 1.23 | 2  | 776-802(1.23) 1175-1200(0.75)                                                                                                                             |
| gnl UG Hs#S1824436  | 1.89 | 1  | 3803-3829(1.89)                                                                                                                                           |
| gnl UG Hs#S15636775 | 0.98 | 2  | 673-698(0.98) 985-1011(0.79)                                                                                                                              |
| gnl UG Hs#S2139059  | 2.17 | 1  | 439-464(2.17)                                                                                                                                             |
| gnl UG Hs#S4285047  | 1.3  | 1  | 186-211(1.30)                                                                                                                                             |
| gnl UG Hs#S11046669 | 0.01 | 1  | 845-873(0.01)                                                                                                                                             |
| gnl UG Hs#S4807771  | 1.08 | 1  | 468-493(1.08)                                                                                                                                             |
| gnl UG Hs#S3972978  | 0.98 | 2  | 674-699(0.98) 986-1012(0.79)                                                                                                                              |
| gnl UG Hs#S1824529  | 1.72 | 6  | 296-321(0.11) 812-839(0.47) 1164-1189(0.72) 1512-1537(1.72) 1578-1605(1.66) 1661-1686(0.20)                                                               |
| gnl UG Hs#S3619106  | 3.78 | 4  | 1285-1312(0.33) 2282-2307(1.43) 3261-3285(3.78) 3308-3332(0.03)                                                                                           |
| gnl UG Hs#S2138979  | 0.72 | 1  | 422-448(0.72)                                                                                                                                             |
| gnl UG Hs#S1730707  | 2.2  | 1  | 265-293(2.20)                                                                                                                                             |
| gnl UG Hs#S1729397  | 1.23 | 3  | 38-64(0.37) 151-177(1.23) 373-399(0.94)                                                                                                                   |
| gnl UG Hs#S2139165  | 4.08 | 1  | 1151-1177(4.08)                                                                                                                                           |
| gnl UG Hs#S5978436  | 1.58 | 1  | 238-264(1.58)                                                                                                                                             |
| gnl UG Hs#S4836499  | 2.33 | 1  | 319-345(2.33)                                                                                                                                             |
| gnl UG Hs#S5860342  | 1.42 | 1  | 1362-1389(1.42)                                                                                                                                           |
| gnl UG Hs#S3439001  | 1.3  | 1  | 659-685(1.30)                                                                                                                                             |
| gnl UG Hs#S1969146  | 2.79 | 10 | 362-387(2.79) 590-616(1.41) 759-785(0.10) 1268-1293(0.68) 1655-1680(1.46) 1695-1723(0.72) 1866-1891(2.20) 1922-1947(0.98) 2355-2380(0.33) 2517-2543(0.72) |
| gnl UG Hs#S1727581  | 0.98 | 2  | 1110-1136(0.53) 1160-1186(0.98)                                                                                                                           |
| gnl UG Hs#S2139636  | 0.3  | 1  | 349-372(0.30)                                                                                                                                             |
| gnl UG Hs#S4815421  | 2.3  | 3  | 426-451(1.00) 1332-1357(2.30) 1472-1497(0.58)                                                                                                             |
| gnl UG Hs#S1727540  | 0.13 | 1  | 590-616(0.13)                                                                                                                                             |
| gnl UG Hs#S1727369  | 0.18 | 1  | 176-202(0.18)                                                                                                                                             |
| gnl UG Hs#S4825433  | 5.46 | 7  | 632-657(5.46) 675-698(0.87) 965-990(3.89) 1005-1028(2.31) 1041-1067(3.04) 1264-1289(0.30) 1321-1346(2.78)                                                 |
| gnl UG Hs#S1728830  | 2.37 | 2  | 161-188(2.37) 198-223(0.97)                                                                                                                               |
| gnl UG Hs#S4554657  | 0.04 | 1  | 22-48(0.04)                                                                                                                                               |
| gnl UG Hs#S4436500  | 1.04 | 1  | 1046-1074(1.04)                                                                                                                                           |
| gnl UG Hs#S3219580  | 1.3  | 1  | 327-352(1.30)                                                                                                                                             |
| gnl UG Hs#S3619631  | 1.72 | 1  | 20-46(1.72)                                                                                                                                               |
| gnl UG Hs#S5978487  | 0.26 | 1  | 2200-2225(0.26)                                                                                                                                           |
| gnl UG Hs#S11046545 | 0.47 | 1  | 594-623(0.47)                                                                                                                                             |
| gnl UG Hs#S1728693  | 2.43 | 1  | 216-241(2.43)                                                                                                                                             |
| gnl UG Hs#S1726555  | 0.11 | 1  | 408-434(0.11)                                                                                                                                             |
| gnl UG Hs#S3987748  | 2.3  | 2  | 23-51(2.30) 166-191(0.74)                                                                                                                                 |
| gnl UG Hs#S4826691  | 0.83 | 2  | 333-359(0.83) 578-602(0.56)                                                                                                                               |
| gnl UG Hs#S1730069  | 0.43 | 1  | 410-436(0.43)                                                                                                                                             |
| gnl UG Hs#S3619300  | 2.23 | 2  | 763-788(0.24) 1196-1221(2.23)                                                                                                                             |
| gnl UG Hs#S1726360  | 2.78 | 2  | 1183-1209(0.27) 1222-1249(2.78)                                                                                                                           |
| gnl UG Hs#S15115732 | 0.43 | 1  | 1267-1292(0.43)                                                                                                                                           |
| gnl UG Hs#S2139444  | 0.17 | 1  | 276-302(0.17)                                                                                                                                             |
| gnl UG Hs#S1732156  | 0.3  | 1  | 971-996(0.30)                                                                                                                                             |

|                     |      |    |                                                                                                                                                          |
|---------------------|------|----|----------------------------------------------------------------------------------------------------------------------------------------------------------|
| gnl UG Hs#S1726706  | 2.37 | 1  | 56-81(2.37)                                                                                                                                              |
| gnl UG Hs#S2293523  | 3.32 | 1  | 87-113(3.32)                                                                                                                                             |
| gnl UG Hs#S3219774  | 0.4  | 1  | 709-735(0.40)                                                                                                                                            |
| gnl UG Hs#S2293426  | 2.78 | 3  | 415-440(2.78) 1031-1056(2.72) 1183-1211(0.85)                                                                                                            |
| gnl UG Hs#S4623439  | 1.24 | 2  | 349-374(1.24) 648-673(1.15)                                                                                                                              |
| gnl UG Hs#S3220056  | 0.24 | 1  | 290-315(0.24)                                                                                                                                            |
| gnl UG Hs#S4821486  | 1.72 | 1  | 1737-1762(1.72)                                                                                                                                          |
| gnl UG Hs#S14272939 | 0.32 | 1  | 592-615(0.32)                                                                                                                                            |
| gnl UG Hs#S2138756  | 2.43 | 1  | 247-273(2.43)                                                                                                                                            |
| gnl UG Hs#S2293736  | 3.89 | 2  | 4-29(3.89) 450-479(0.39)                                                                                                                                 |
| gnl UG Hs#S11154082 | 0.11 | 2  | 1536-1562(0.11) 1657-1682(0.09)                                                                                                                          |
| gnl UG Hs#S4631398  | 0.8  | 4  | 604-632(0.01) 665-688(0.80) 838-862(0.08) 951-976(0.11)                                                                                                  |
| gnl UG Hs#S3881174  | 2.82 | 1  | 1290-1316(2.82)                                                                                                                                          |
| gnl UG Hs#S4553792  | 2.9  | 1  | 76-101(2.90)                                                                                                                                             |
| gnl UG Hs#S3438635  | 3.13 | 3  | 100-125(0.98) 1473-1499(3.13) 1807-1835(1.37)                                                                                                            |
| gnl UG Hs#S2138851  | 0.18 | 1  | 489-517(0.18)                                                                                                                                            |
| gnl UG Hs#S4829260  | 0.82 | 3  | 1123-1149(0.82) 1724-1750(0.04) 1856-1881(0.72)                                                                                                          |
| gnl UG Hs#S4807560  | 3.78 | 1  | 173-198(3.78)                                                                                                                                            |
| gnl UG Hs#S11046742 | 0.43 | 1  | 144-170(0.43)                                                                                                                                            |
| gnl UG Hs#S705558   | 0.3  | 1  | 1312-1337(0.30)                                                                                                                                          |
| gnl UG Hs#S1729372  | 1.2  | 1  | 827-852(1.20)                                                                                                                                            |
| gnl UG Hs#S1730951  | 0.3  | 1  | 59-84(0.30)                                                                                                                                              |
| gnl UG Hs#S15641830 | 4.3  | 5  | 31-56(1.34) 543-568(4.30) 754-779(0.65) 786-814(0.30) 1581-1606(2.72)                                                                                    |
| gnl UG Hs#S10831803 | 1.3  | 4  | 139-164(0.67) 204-229(0.46) 291-316(1.30) 401-426(1.07)                                                                                                  |
| gnl UG Hs#S2139976  | 0.24 | 1  | 132-158(0.24)                                                                                                                                            |
| gnl UG Hs#S10831729 | 0.53 | 1  | 1344-1367(0.53)                                                                                                                                          |
| gnl UG Hs#S4821111  | 1.39 | 2  | 656-681(1.39) 705-730(0.36)                                                                                                                              |
| gnl UG Hs#S3547217  | 0.91 | 2  | 337-362(0.01) 1075-1103(0.91)                                                                                                                            |
| gnl UG Hs#S3355494  | 0.46 | 1  | 127-152(0.46)                                                                                                                                            |
| gnl UG Hs#S4817859  | 3.46 | 3  | 2131-2156(1.15) 2164-2190(0.08) 2820-2845(3.46)                                                                                                          |
| gnl UG Hs#S2293814  | 1.16 | 3  | 336-361(0.98) 419-445(0.26) 497-525(1.16)                                                                                                                |
| gnl UG Hs#S14802414 | 3.89 | 10 | 89-115(2.50) 290-315(0.58) 755-780(1.46) 1234-1259(3.89) 1270-1295(2.58) 1608-1634(1.25) 1723-1748(1.80) 1825-1850(1.84) 2044-2072(0.48) 3418-3443(0.65) |
| gnl UG Hs#S3803102  | 0.52 | 1  | 625-650(0.52)                                                                                                                                            |
| gnl UG Hs#S1730070  | 1.4  | 1  | 1158-1184(1.40)                                                                                                                                          |
| gnl UG Hs#S3619568  | 2.08 | 1  | 378-403(2.08)                                                                                                                                            |
| gnl UG Hs#S1824288  | 0.8  | 3  | 379-407(0.65) 1200-1227(0.43) 1443-1469(0.80)                                                                                                            |
| gnl UG Hs#S4283975  | 1.15 | 1  | 2137-2162(1.15)                                                                                                                                          |
| gnl UG Hs#S4807857  | 0.71 | 2  | 609-637(0.71) 714-737(0.26)                                                                                                                              |
| gnl UG Hs#S2293822  | 1.56 | 1  | 612-637(1.56)                                                                                                                                            |
| gnl UG Hs#S3603216  | 1.84 | 1  | 367-392(1.84)                                                                                                                                            |
| gnl UG Hs#S3220116  | 0.66 | 1  | 227-252(0.66)                                                                                                                                            |
| gnl UG Hs#S5978574  | 0.91 | 1  | 717-742(0.91)                                                                                                                                            |
| gnl UG Hs#S4807850  | 1.03 | 1  | 545-571(1.03)                                                                                                                                            |
| gnl UG Hs#S15639035 | 0.53 | 2  | 265-290(0.53) 294-319(0.53)                                                                                                                              |
| gnl UG Hs#S1730396  | 1.14 | 1  | 107-132(1.14)                                                                                                                                            |
| gnl UG Hs#S1729449  | 2.71 | 2  | 360-387(2.71) 487-512(1.30)                                                                                                                              |
| gnl UG Hs#S3619628  | 0.16 | 1  | 569-593(0.16)                                                                                                                                            |
| gnl UG Hs#S3355628  | 2.46 | 2  | 327-352(1.11) 629-654(2.46)                                                                                                                              |
| gnl UG Hs#S3355700  | 0.91 | 1  | 520-546(0.91)                                                                                                                                            |
| gnl UG Hs#S1727179  | 0.94 | 2  | 10-35(0.91) 67-94(0.94)                                                                                                                                  |
| gnl UG Hs#S5495007  | 0.23 | 1  | 861-886(0.23)                                                                                                                                            |
| gnl UG Hs#S1732105  | 1.21 | 3  | 116-142(0.76) 413-438(1.21) 608-633(1.07)                                                                                                                |
| gnl UG Hs#S1731999  | 1.82 | 1  | 301-327(1.82)                                                                                                                                            |
| gnl UG Hs#S4045037  | 1.98 | 1  | 363-388(1.98)                                                                                                                                            |

|                     |      |    |                                                                                                                                                                                           |
|---------------------|------|----|-------------------------------------------------------------------------------------------------------------------------------------------------------------------------------------------|
| gnl UG Hs#S2294315  | 0.17 | 1  | 23-48(0.17)                                                                                                                                                                               |
| gnl UG Hs#S2293409  | 5.08 | 2  | 387-412(0.62) 1131-1157(5.08)                                                                                                                                                             |
| gnl UG Hs#S3973086  | 1.5  | 1  | 472-498(1.50)                                                                                                                                                                             |
| gnl UG Hs#S2138988  | 3.11 | 3  | 172-197(1.30) 291-315(1.08) 393-418(3.11)                                                                                                                                                 |
| gnl UG Hs#S1728136  | 1.84 | 4  | 211-237(0.86) 408-433(0.68) 641-666(1.84) 809-835(0.78)                                                                                                                                   |
| gnl UG Hs#S4807814  | 1.33 | 1  | 192-218(1.33)                                                                                                                                                                             |
| gnl UG Hs#S15642952 | 2.25 | 1  | 1024-1049(2.25)                                                                                                                                                                           |
| gnl UG Hs#S1727806  | 1.66 | 1  | 176-201(1.66)                                                                                                                                                                             |
| gnl UG Hs#S4284228  | 2.43 | 3  | 518-541(0.89) 1145-1170(0.26) 2289-2314(2.43)                                                                                                                                             |
| gnl UG Hs#S11154035 | 0.14 | 1  | 317-343(0.14)                                                                                                                                                                             |
| gnl UG Hs#S3619561  | 1.07 | 2  | 709-734(0.80) 1149-1173(1.07)                                                                                                                                                             |
| gnl UG Hs#S4806748  | 1.98 | 1  | 555-580(1.98)                                                                                                                                                                             |
| gnl UG Hs#S15631500 | 4.68 | 2  | 194-219(4.68) 785-812(0.88)                                                                                                                                                               |
| gnl UG Hs#S2138731  | 1.34 | 2  | 519-546(1.00) 554-577(1.34)                                                                                                                                                               |
| gnl UG Hs#S5978620  | 0.2  | 2  | 1684-1709(0.03) 4303-4328(0.20)                                                                                                                                                           |
| gnl UG Hs#S4284289  | 2.53 | 3  | 413-441(0.07) 659-685(2.46) 2246-2271(2.53)                                                                                                                                               |
| gnl UG Hs#S1727551  | 5.66 | 5  | 352-377(0.13) 883-911(0.88) 925-950(5.66) 1284-1312(0.64) 1839-1861(0.27)                                                                                                                 |
| gnl UG Hs#S1728887  | 2.75 | 2  | 616-641(2.75) 920-948(0.91)                                                                                                                                                               |
| gnl UG Hs#S3543451  | 0.2  | 1  | 472-497(0.20)                                                                                                                                                                             |
| gnl UG Hs#S1726886  | 7.66 | 1  | 409-435(7.66)                                                                                                                                                                             |
| gnl UG Hs#S3837442  | 0.23 | 1  | 358-383(0.23)                                                                                                                                                                             |
| gnl UG Hs#S2138894  | 4.3  | 6  | 918-946(0.23) 1518-1545(2.39) 1727-1752(0.04) 1837-1863(0.59) 3814-3839(4.30) 3905-3930(0.04)                                                                                             |
| gnl UG Hs#S15632890 | 1.43 | 3  | 502-529(0.29) 567-593(1.43) 1244-1270(0.86)                                                                                                                                               |
| gnl UG Hs#S3601578  | 0.56 | 1  | 1442-1466(0.56)                                                                                                                                                                           |
| gnl UG Hs#S1728216  | 0.76 | 1  | 205-231(0.76)                                                                                                                                                                             |
| gnl UG Hs#S4001823  | 1.35 | 1  | 288-313(1.35)                                                                                                                                                                             |
| gnl UG Hs#S1728884  | 1.61 | 3  | 808-833(1.27) 1566-1591(1.61) 1619-1645(0.58)                                                                                                                                             |
| gnl UG Hs#S2293397  | 2.2  | 3  | 390-418(0.14) 444-471(2.20) 994-1020(0.91)                                                                                                                                                |
| gnl UG Hs#S6091898  | 1.03 | 2  | 252-277(0.53) 351-378(1.03)                                                                                                                                                               |
| gnl UG Hs#S1728540  | 2.79 | 3  | 110-135(0.57) 392-415(2.79) 1163-1188(0.89)                                                                                                                                               |
| gnl UG Hs#S15636918 | 2.67 | 1  | 173-198(2.67)                                                                                                                                                                             |
| gnl UG Hs#S2139643  | 3.74 | 14 | 3-31(0.23) 99-124(0.40) 468-493(0.94) 842-866(2.36) 815-840(0.50) 1273-1298(1.58) 1459-1484(0.65) 1670-1698(1.30) 1715-1742(0.51) 2196-2224(3.74) 2317-2342(0.94) 2974-3000(1.21) 3028-30 |
| gnl UG Hs#S4827258  | 3.04 | 1  | 301-326(3.04)                                                                                                                                                                             |
| gnl UG Hs#S5495028  | 2.76 | 1  | 185-211(2.76)                                                                                                                                                                             |
| gnl UG Hs#S1729229  | 2.37 | 1  | 96-124(2.37)                                                                                                                                                                              |
| gnl UG Hs#S3619261  | 0.59 | 1  | 15-43(0.59)                                                                                                                                                                               |
| gnl UG Hs#S1727995  | 2.99 | 2  | 1427-1452(1.98) 1920-1946(2.99)                                                                                                                                                           |
| gnl UG Hs#S10832230 | 0.13 | 1  | 529-553(0.13)                                                                                                                                                                             |
| gnl UG Hs#S4841821  | 2.9  | 2  | 576-602(2.50) 1173-1197(2.90)                                                                                                                                                             |
| gnl UG Hs#S2294259  | 3.54 | 4  | 685-709(1.14) 849-874(0.15) 1408-1433(3.54) 1847-1872(1.39)                                                                                                                               |
| gnl UG Hs#S2293524  | 3.18 | 1  | 496-521(3.18)                                                                                                                                                                             |
| gnl UG Hs#S4545966  | 4.01 | 1  | 457-483(4.01)                                                                                                                                                                             |
| gnl UG Hs#S15631439 | 0.82 | 1  | 737-763(0.82)                                                                                                                                                                             |
| gnl UG Hs#S3333475  | 2.57 | 1  | 71-96(2.57)                                                                                                                                                                               |
| gnl UG Hs#S3333648  | 0.94 | 1  | 117-142(0.94)                                                                                                                                                                             |
| gnl UG Hs#S1726522  | 0.78 | 1  | 179-204(0.78)                                                                                                                                                                             |
| gnl UG Hs#S2139505  | 1.43 | 2  | 168-193(0.30) 217-242(1.43)                                                                                                                                                               |
| gnl UG Hs#S2139616  | 0.77 | 3  | 223-247(0.45) 1163-1189(0.77) 1460-1485(0.07)                                                                                                                                             |
| gnl UG Hs#S4619158  | 1.18 | 2  | 737-762(1.18) 872-898(0.27)                                                                                                                                                               |
| gnl UG Hs#S4815108  | 1.5  | 1  | 253-279(1.50)                                                                                                                                                                             |
| gnl UG Hs#S7112019  | 0.5  | 1  | 916-941(0.50)                                                                                                                                                                             |
| gnl UG Hs#S3973137  | 0.09 | 2  | 257-280(0.08) 309-333(0.09)                                                                                                                                                               |
| gnl UG Hs#S4045153  | 3.3  | 4  | 26-52(3.30) 341-369(0.26) 586-612(0.33) 1006-1031(2.91)                                                                                                                                   |
| gnl UG Hs#S3219949  | 1.03 | 3  | 278-306(0.27) 682-710(1.03) 1425-1450(0.17)                                                                                                                                               |

|                     |      |                                                                                                   |
|---------------------|------|---------------------------------------------------------------------------------------------------|
| gnl UG Hs#S4815300  | 6.95 | 3 86-113(0.14) 1261-1289(0.13) 1658-1683(6.95)                                                    |
| gnl UG Hs#S6158564  | 2.21 | 3 1038-1064(2.21) 1303-1329(0.27) 1771-1796(1.63)                                                 |
| gnl UG Hs#S3219170  | 0.72 | 1 54-79(0.72)                                                                                     |
| gnl UG Hs#S7110351  | 1.43 | 1 1313-1340(1.43)                                                                                 |
| gnl UG Hs#S15638352 | 2.04 | 1 618-644(2.04)                                                                                   |
| gnl UG Hs#S15639256 | 0.94 | 1 593-618(0.94)                                                                                   |
| gnl UG Hs#S3547240  | 0.75 | 1 2415-2443(0.75)                                                                                 |
| gnl UG Hs#S7110766  | 5.66 | 3 606-631(0.13) 1140-1168(0.88) 1182-1207(5.66)                                                   |
| gnl UG Hs#S3438846  | 0.14 | 1 438-466(0.14)                                                                                   |
| gnl UG Hs#S10832201 | 2.04 | 3 75-101(2.04) 251-276(1.13) 1531-1556(1.40)                                                      |
| gnl UG Hs#S1969110  | 6.3  | 3 583-611(1.75) 738-764(6.30) 2385-2410(1.47)                                                     |
| gnl UG Hs#S2294283  | 4.63 | 6 490-516(1.89) 923-949(0.10) 1190-1216(0.32) 1305-1332(4.63) 1696-1721(1.53) 2308-2333(0.14)     |
| gnl UG Hs#S4817011  | 4.13 | 1 1349-1377(4.13)                                                                                 |
| gnl UG Hs#S1731381  | 0.43 | 1 265-290(0.43)                                                                                   |
| gnl UG Hs#S15730142 | 3.53 | 2 1105-1130(3.53) 1826-1853(3.51)                                                                 |
| gnl UG Hs#S4553555  | 5.26 | 2 125-150(0.72) 544-569(5.26)                                                                     |
| gnl UG Hs#S3438844  | 1.5  | 1 660-685(1.50)                                                                                   |
| gnl UG Hs#S1732107  | 0.74 | 2 37-62(0.74) 87-113(0.23)                                                                        |
| gnl UG Hs#S14812324 | 6.47 | 5 54-79(6.47) 231-256(0.69) 399-424(0.20) 754-782(1.03) 1192-1218(0.56)                           |
| gnl UG Hs#S3603062  | 1.44 | 1 1795-1821(1.44)                                                                                 |
| gnl UG Hs#S1726474  | 0.67 | 1 65-91(0.67)                                                                                     |
| gnl UG Hs#S1729255  | 1.83 | 5 403-428(0.30) 459-485(0.25) 508-533(1.83) 818-843(1.04) 848-871(0.25)                           |
| gnl UG Hs#S2294350  | 2.79 | 4 325-351(2.79) 808-833(0.74) 987-1011(1.36) 1037-1065(2.66)                                      |
| gnl UG Hs#S1731651  | 4.24 | 6 1714-1739(3.30) 1799-1825(2.75) 2985-3010(0.37) 3648-3673(1.45) 3706-3731(4.24) 3796-3821(0.97) |
| gnl UG Hs#S4807891  | 4.07 | 1 1225-1250(4.07)                                                                                 |
| gnl UG Hs#S2139579  | 1.81 | 3 307-332(0.26) 351-376(1.48) 575-603(1.81)                                                       |
| gnl UG Hs#S3618871  | 0.4  | 1 1002-1027(0.40)                                                                                 |
| gnl UG Hs#S4553482  | 1.12 | 2 1028-1053(0.07) 1761-1787(1.12)                                                                 |
| gnl UG Hs#S1732213  | 0.9  | 1 103-131(0.90)                                                                                   |
| gnl UG Hs#S2139415  | 3.94 | 6 196-221(0.63) 561-586(3.94) 735-760(0.94) 861-886(1.25) 1196-1224(1.13) 1537-1563(2.01)         |
| gnl UG Hs#S6159132  | 1.2  | 1 2313-2339(1.20)                                                                                 |
| gnl UG Hs#S3803680  | 2.89 | 4 591-616(2.89) 1097-1123(1.04) 1286-1309(1.17) 1323-1348(0.19)                                   |
| gnl UG Hs#S11046709 | 2.08 | 2 458-483(2.08) 499-523(0.66)                                                                     |
| gnl UG Hs#S10832470 | 1.08 | 3 563-588(1.08) 621-649(0.20) 1187-1214(0.26)                                                     |
| gnl UG Hs#S5930953  | 0.57 | 1 469-495(0.57)                                                                                   |
| gnl UG Hs#S2293576  | 0.46 | 2 1151-1176(0.40) 1255-1281(0.46)                                                                 |
| gnl UG Hs#S4813878  | 2.34 | 2 443-468(0.24) 3296-3321(2.34)                                                                   |
| gnl UG Hs#S1732135  | 1.71 | 1 791-819(1.71)                                                                                   |
| gnl UG Hs#S2139968  | 0.04 | 1 174-199(0.04)                                                                                   |
| gnl UG Hs#S3219814  | 2.36 | 2 594-619(0.27) 1182-1207(2.36)                                                                   |
| gnl UG Hs#S3355463  | 3.04 | 3 108-133(3.04) 364-389(0.68) 721-746(2.30)                                                       |
| gnl UG Hs#S1729100  | 1.27 | 2 174-200(0.33) 336-362(1.27)                                                                     |
| gnl UG Hs#S14812336 | 4.49 | 1 62-88(4.49)                                                                                     |
| gnl UG Hs#S3219279  | 0.3  | 1 252-275(0.30)                                                                                   |
| gnl UG Hs#S1727509  | 0.71 | 1 57-85(0.71)                                                                                     |
| gnl UG Hs#S3603139  | 0.33 | 1 217-243(0.33)                                                                                   |
| gnl UG Hs#S1731059  | 2.27 | 5 538-564(0.43) 970-998(1.03) 1083-1107(0.15) 1478-1506(1.77) 1528-1553(2.27)                     |
| gnl UG Hs#S5978616  | 1.14 | 1 1428-1453(1.14)                                                                                 |
| gnl UG Hs#S3219571  | 0.27 | 1 106-132(0.27)                                                                                   |
| gnl UG Hs#S2138822  | 0.58 | 4 837-865(0.26) 1733-1762(0.39) 1933-1958(0.58) 2018-2046(0.30)                                   |
| gnl UG Hs#S2138908  | 1.3  | 1 183-209(1.30)                                                                                   |
| gnl UG Hs#S4807976  | 0.82 | 2 517-541(0.07) 910-935(0.82)                                                                     |
| gnl UG Hs#S4435662  | 4.3  | 3 183-211(4.30) 756-784(0.91) 1597-1622(1.23)                                                     |
| gnl UG Hs#S3814574  | 2.76 | 5 107-130(0.45) 519-544(2.53) 662-688(2.76) 1270-1298(0.40) 1617-1643(1.66)                       |

|                     |      |                                                                                                                                                                                              |
|---------------------|------|----------------------------------------------------------------------------------------------------------------------------------------------------------------------------------------------|
| gnl UG Hs#S4620635  | 0.82 | 2 544-569(0.82) 1573-1598(0.47)                                                                                                                                                              |
| gnl UG Hs#S1731114  | 2.57 | 2 94-119(1.50) 596-621(2.57)                                                                                                                                                                 |
| gnl UG Hs#S1727459  | 2.08 | 1 596-621(2.08)                                                                                                                                                                              |
| gnl UG Hs#S3547238  | 0.82 | 1 368-393(0.82)                                                                                                                                                                              |
| gnl UG Hs#S3355521  | 0.91 | 1 37-63(0.91)                                                                                                                                                                                |
| gnl UG Hs#S1726367  | 1.26 | 1 1615-1644(1.26)                                                                                                                                                                            |
| gnl UG Hs#S1569312  | 1.68 | 1 1624-1649(1.68)                                                                                                                                                                            |
| gnl UG Hs#S3218911  | 1.3  | 2 1525-1551(1.30) 1635-1663(0.72)                                                                                                                                                            |
| gnl UG Hs#S1969181  | 3.07 | 1 1730-1757(3.07)                                                                                                                                                                            |
| gnl UG Hs#S15644795 | 3.4  | 5 648-676(3.40) 781-806(0.85) 1150-1178(0.16) 1403-1428(0.04) 1499-1524(1.30)                                                                                                                |
| gnl UG Hs#S1728066  | 0.43 | 2 155-180(0.43) 1149-1176(0.14)                                                                                                                                                              |
| gnl UG Hs#S1729328  | 0.33 | 1 442-467(0.33)                                                                                                                                                                              |
| gnl UG Hs#S1727135  | 0.72 | 1 744-769(0.72)                                                                                                                                                                              |
| gnl UG Hs#S3219587  | 3.09 | 8 86-110(0.04) 524-552(0.04) 846-871(0.17) 1015-1040(1.18) 2400-2426(3.09) 2840-2866(1.50) 3069-3094(1.65) 3099-3125(0.54)                                                                   |
| gnl UG Hs#S2654903  | 1.84 | 1 844-869(1.84)                                                                                                                                                                              |
| gnl UG Hs#S15631481 | 1.34 | 1 483-509(1.34)                                                                                                                                                                              |
| gnl UG Hs#S1727906  | 2.32 | 2 1036-1061(2.32) 1635-1663(1.14)                                                                                                                                                            |
| gnl UG Hs#S10832494 | 0.34 | 2 80-107(0.34) 483-508(0.30)                                                                                                                                                                 |
| gnl UG Hs#S2140651  | 1.17 | 1 296-321(1.17)                                                                                                                                                                              |
| gnl UG Hs#S2140356  | 2.76 | 1 680-706(2.76)                                                                                                                                                                              |
| gnl UG Hs#S1729948  | 5.84 | 4 150-175(1.14) 487-512(5.84) 912-937(2.23) 1815-1840(1.43)                                                                                                                                  |
| gnl UG Hs#S4614536  | 0.03 | 1 2019-2044(0.03)                                                                                                                                                                            |
| gnl UG Hs#S1729604  | 3.56 | 3 7-33(0.91) 36-61(0.84) 469-495(3.56)                                                                                                                                                       |
| gnl UG Hs#S2140158  | 1.11 | 2 36-64(0.94) 174-199(1.11)                                                                                                                                                                  |
| gnl UG Hs#S4285324  | 1.66 | 1 510-536(1.66)                                                                                                                                                                              |
| gnl UG Hs#S2140172  | 0.77 | 2 329-357(0.07) 869-895(0.77)                                                                                                                                                                |
| gnl UG Hs#S2139760  | 3.52 | 1 613-636(3.52)                                                                                                                                                                              |
| gnl UG Hs#S1727830  | 1.23 | 2 1085-1113(0.08) 2086-2114(1.23)                                                                                                                                                            |
| gnl UG Hs#S4546121  | 3.56 | 2 108-134(2.08) 588-613(3.56)                                                                                                                                                                |
| gnl UG Hs#S2140521  | 3.31 | 6 580-605(1.30) 638-663(2.26) 1348-1373(1.07) 1404-1429(1.75) 1455-1480(0.46) 1784-1809(3.31)                                                                                                |
| gnl UG Hs#S15639692 | 0.14 | 1 176-201(0.14)                                                                                                                                                                              |
| gnl UG Hs#S1727903  | 0.38 | 1 76-101(0.38)                                                                                                                                                                               |
| gnl UG Hs#S3438565  | 2.3  | 3 79-109(0.09) 114-139(0.97) 603-629(2.30)                                                                                                                                                   |
| gnl UG Hs#S3218898  | 1.87 | 3 427-453(1.11) 693-718(1.87) 758-786(0.30)                                                                                                                                                  |
| gnl UG Hs#S4841552  | 3.56 | 1 928-952(3.56)                                                                                                                                                                              |
| gnl UG Hs#S1732285  | 1.3  | 1 760-786(1.30)                                                                                                                                                                              |
| gnl UG Hs#S4825556  | 3.17 | 4 176-201(0.40) 945-972(2.39) 1401-1427(0.82) 1456-1484(3.17)                                                                                                                                |
| gnl UG Hs#S2294551  | 2.62 | 4 15-40(0.75) 134-159(2.62) 627-655(2.47) 952-978(1.97)                                                                                                                                      |
| gnl UG Hs#S4807965  | 0.49 | 2 38-63(0.30) 93-121(0.49)                                                                                                                                                                   |
| gnl UG Hs#S1971798  | 0.84 | 1 287-312(0.84)                                                                                                                                                                              |
| gnl UG Hs#S7110147  | 4.35 | 15 91-116(1.21) 335-363(0.59) 448-473(4.35) 937-962(1.02) 1040-1066(2.62) 1207-1231(0.08) 1299-1325(2.04) 1915-1940(0.30) 2166-2190(0.17) 2264-2290(0.13) 2548-2573(1.62) 3038-3066(2.88) 3: |
| gnl UG Hs#S3355488  | 2.94 | 4 257-285(0.72) 683-708(0.58) 1440-1465(2.36) 2022-2047(2.94)                                                                                                                                |
| gnl UG Hs#S2140053  | 0.01 | 1 55-80(0.01)                                                                                                                                                                                |
| gnl UG Hs#S14863764 | 3    | 7 440-465(2.40) 966-992(0.53) 2238-2266(1.79) 2337-2364(1.02) 2609-2633(0.53) 2658-2684(3.00) 2859-2885(2.53)                                                                                |
| gnl UG Hs#S2293235  | 3.04 | 2 207-232(3.04) 442-470(1.59)                                                                                                                                                                |
| gnl UG Hs#S2139572  | 3.09 | 3 1908-1933(0.11) 1955-1980(0.49) 2157-2182(3.09)                                                                                                                                            |
| gnl UG Hs#S2139591  | 0.86 | 2 646-672(0.20) 1204-1230(0.86)                                                                                                                                                              |
| gnl UG Hs#S4822935  | 3.78 | 1 222-247(3.78)                                                                                                                                                                              |
| gnl UG Hs#S5860306  | 3.45 | 5 285-313(2.40) 390-414(1.03) 499-524(3.45) 586-611(0.68) 758-783(2.13)                                                                                                                      |
| gnl UG Hs#S1728306  | 3.58 | 2 33-57(3.58) 159-184(0.57)                                                                                                                                                                  |
| gnl UG Hs#S2138788  | 2.44 | 3 806-831(0.04) 1049-1075(2.44) 1197-1222(1.13)                                                                                                                                              |
| gnl UG Hs#S4392165  | 1.72 | 5 260-285(1.72) 292-320(0.01) 607-632(0.33) 723-751(1.52) 1113-1138(1.47)                                                                                                                    |
| gnl UG Hs#S2140042  | 0.72 | 2 443-468(0.72) 790-818(0.49)                                                                                                                                                                |
| gnl UG Hs#S1263869  | 1.74 | 2 527-553(0.24) 1406-1429(1.74)                                                                                                                                                              |



|                     |      |                                                                                                                                               |
|---------------------|------|-----------------------------------------------------------------------------------------------------------------------------------------------|
| gnl UG Hs#S1732348  | 2.34 | 7 119-144(1.82) 406-431(0.17) 527-552(1.46) 757-784(2.34) 965-993(0.27) 1022-1045(0.96) 1087-1116(0.16)                                       |
| gnl UG Hs#S4807651  | 1.62 | 1 115-139(1.62)                                                                                                                               |
| gnl UG Hs#S1731655  | 2.77 | 6 251-277(1.50) 605-631(0.04) 868-896(1.08) 1444-1471(0.43) 2034-2058(1.94) 2456-2480(2.77)                                                   |
| gnl UG Hs#S7112182  | 4.43 | 1 1172-1197(4.43)                                                                                                                             |
| gnl UG Hs#S1732283  | 1.71 | 1 748-776(1.71)                                                                                                                               |
| gnl UG Hs#S1728924  | 2.39 | 1 57-82(2.39)                                                                                                                                 |
| gnl UG Hs#S1728768  | 1.3  | 1 2662-2690(1.30)                                                                                                                             |
| gnl UG Hs#S3219516  | 1.84 | 2 1606-1632(1.84) 1641-1666(0.43)                                                                                                             |
| gnl UG Hs#S11046589 | 3.11 | 5 509-534(2.57) 895-920(3.11) 1034-1062(1.40) 1131-1156(0.55) 1207-1233(0.04)                                                                 |
| gnl UG Hs#S1728876  | 1.22 | 2 711-736(1.22) 1884-1909(0.04)                                                                                                               |
| gnl UG Hs#S4818908  | 0.72 | 1 1013-1038(0.72)                                                                                                                             |
| gnl UG Hs#S1727046  | 2.23 | 2 1619-1644(2.23) 1803-1829(0.56)                                                                                                             |
| gnl UG Hs#S1731205  | 0.72 | 1 111-136(0.72)                                                                                                                               |
| gnl UG Hs#S1732290  | 0.88 | 1 142-165(0.88)                                                                                                                               |
| gnl UG Hs#S2139009  | 1.91 | 2 97-122(1.91) 555-579(0.01)                                                                                                                  |
| gnl UG Hs#S1824441  | 0.13 | 1 569-594(0.13)                                                                                                                               |
| gnl UG Hs#S1728088  | 1.9  | 2 328-356(1.90) 471-496(1.36)                                                                                                                 |
| gnl UG Hs#S1729079  | 1.08 | 1 335-361(1.08)                                                                                                                               |
| gnl UG Hs#S4284903  | 0.13 | 1 1428-1453(0.13)                                                                                                                             |
| gnl UG Hs#S4807847  | 2.88 | 3 202-227(0.40) 303-331(1.08) 468-496(2.88)                                                                                                   |
| gnl UG Hs#S1730137  | 5.07 | 3 617-645(0.23) 748-776(5.07) 1236-1261(0.98)                                                                                                 |
| gnl UG Hs#S3219345  | 0.77 | 1 115-140(0.77)                                                                                                                               |
| gnl UG Hs#S4807619  | 0.04 | 1 345-370(0.04)                                                                                                                               |
| gnl UG Hs#S4283751  | 1.04 | 3 79-105(0.28) 298-324(1.04) 805-830(0.26)                                                                                                    |
| gnl UG Hs#S3219837  | 1.72 | 3 158-183(0.30) 302-328(1.72) 750-775(0.08)                                                                                                   |
| gnl UG Hs#S1730923  | 5.39 | 9 212-238(2.69) 834-860(0.04) 1012-1037(3.87) 1056-1084(5.39) 1645-1670(2.96) 2050-2076(1.43) 2185-2210(2.07) 3740-3765(1.30) 4120-4145(1.30) |
| gnl UG Hs#S1729885  | 0.23 | 1 129-157(0.23)                                                                                                                               |
| gnl UG Hs#S4284538  | 7.46 | 3 1012-1040(2.75) 1067-1092(5.11) 1198-1223(7.46)                                                                                             |
| gnl UG Hs#S2655102  | 1.15 | 1 3336-3362(1.15)                                                                                                                             |
| gnl UG Hs#S1728639  | 0.53 | 1 47-72(0.53)                                                                                                                                 |
| gnl UG Hs#S4829242  | 0.26 | 1 404-431(0.26)                                                                                                                               |
| gnl UG Hs#S2293388  | 4.4  | 3 282-307(1.07) 746-772(0.89) 1433-1459(4.40)                                                                                                 |
| gnl UG Hs#S4841598  | 2.53 | 1 180-205(2.53)                                                                                                                               |
| gnl UG Hs#S1728677  | 0.3  | 1 19-46(0.30)                                                                                                                                 |
| gnl UG Hs#S3219549  | 1.3  | 1 1070-1095(1.30)                                                                                                                             |
| gnl UG Hs#S5930899  | 1.63 | 1 1133-1158(1.63)                                                                                                                             |
| gnl UG Hs#S4392403  | 0.63 | 1 521-546(0.63)                                                                                                                               |
| gnl UG Hs#S1731042  | 1.08 | 2 1098-1123(0.72) 1660-1685(1.08)                                                                                                             |
| gnl UG Hs#S4284293  | 1.42 | 1 704-732(1.42)                                                                                                                               |
| gnl UG Hs#S1728840  | 1.65 | 1 93-118(1.65)                                                                                                                                |
| gnl UG Hs#S4045921  | 1.33 | 1 659-684(1.33)                                                                                                                               |
| gnl UG Hs#S6686674  | 0.88 | 1 352-380(0.88)                                                                                                                               |
| gnl UG Hs#S1726837  | 2.67 | 1 912-937(2.67)                                                                                                                               |
| gnl UG Hs#S3602285  | 2.04 | 2 943-968(2.04) 2076-2101(0.33)                                                                                                               |
| gnl UG Hs#S1726278  | 3.67 | 1 195-220(3.67)                                                                                                                               |
| gnl UG Hs#S2139911  | 6.39 | 2 112-137(0.82) 240-265(6.39)                                                                                                                 |
| gnl UG Hs#S4822855  | 1.62 | 4 290-318(1.02) 322-349(1.24) 350-378(1.62) 611-636(0.17)                                                                                     |
| gnl UG Hs#S2294203  | 6.18 | 1 1899-1925(6.18)                                                                                                                             |
| gnl UG Hs#S1731264  | 2.58 | 4 93-118(0.26) 430-455(0.48) 585-610(1.43) 692-717(2.58)                                                                                      |
| gnl UG Hs#S6163382  | 0.94 | 1 879-904(0.94)                                                                                                                               |
| gnl UG Hs#S1727988  | 0.11 | 1 1161-1187(0.11)                                                                                                                             |
| gnl UG Hs#S2139660  | 1.1  | 4 157-185(0.23) 490-517(0.16) 676-703(0.29) 936-962(1.10)                                                                                     |
| gnl UG Hs#S10832420 | 4.07 | 3 359-387(4.07) 960-985(0.08) 1605-1630(0.57)                                                                                                 |
| gnl UG Hs#S2139886  | 1.58 | 2 762-787(0.94) 3177-3203(1.58)                                                                                                               |

|                     |      |    |                                                                                                                                                                                           |
|---------------------|------|----|-------------------------------------------------------------------------------------------------------------------------------------------------------------------------------------------|
| gnl UG Hs#S11046569 | 4.75 | 3  | 388-415(1.03) 829-854(4.75) 1739-1766(0.37)                                                                                                                                               |
| gnl UG Hs#S5978659  | 0.94 | 1  | 144-169(0.94)                                                                                                                                                                             |
| gnl UG Hs#S15642148 | 1.5  | 1  | 922-947(1.50)                                                                                                                                                                             |
| gnl UG Hs#S1730842  | 2.08 | 1  | 1860-1886(2.08)                                                                                                                                                                           |
| gnl UG Hs#S3438794  | 1.46 | 1  | 823-848(1.46)                                                                                                                                                                             |
| gnl UG Hs#S4284722  | 0.3  | 2  | 1168-1191(0.07) 2007-2032(0.30)                                                                                                                                                           |
| gnl UG Hs#S2293756  | 1.58 | 2  | 886-911(0.48) 1084-1110(1.58)                                                                                                                                                             |
| gnl UG Hs#S1728466  | 1.14 | 1  | 287-312(1.14)                                                                                                                                                                             |
| gnl UG Hs#S1726271  | 1.3  | 1  | 131-156(1.30)                                                                                                                                                                             |
| gnl UG Hs#S1727633  | 0.14 | 1  | 133-158(0.14)                                                                                                                                                                             |
| gnl UG Hs#S3601741  | 5.63 | 3  | 775-800(1.40) 1105-1131(5.63) 1168-1193(3.30)                                                                                                                                             |
| gnl UG Hs#S2293851  | 2.62 | 1  | 598-623(2.62)                                                                                                                                                                             |
| gnl UG Hs#S1726225  | 2.13 | 3  | 153-178(1.28) 198-223(2.13) 856-882(0.17)                                                                                                                                                 |
| gnl UG Hs#S1726992  | 1.4  | 2  | 104-129(1.40) 211-236(0.78)                                                                                                                                                               |
| gnl UG Hs#S3619175  | 3.67 | 3  | 934-961(0.31) 1127-1153(0.85) 1438-1462(3.67)                                                                                                                                             |
| gnl UG Hs#S3603085  | 1.04 | 1  | 566-591(1.04)                                                                                                                                                                             |
| gnl UG Hs#S3220044  | 1.72 | 2  | 149-174(1.72) 193-218(1.13)                                                                                                                                                               |
| gnl UG Hs#S1824414  | 1.3  | 2  | 100-125(1.30) 941-966(0.01)                                                                                                                                                               |
| gnl UG Hs#S1726614  | 0.98 | 4  | 407-432(0.30) 696-721(0.98) 1186-1212(0.33) 1470-1495(0.71)                                                                                                                               |
| gnl UG Hs#S4807580  | 0.57 | 1  | 735-761(0.57)                                                                                                                                                                             |
| gnl UG Hs#S4815009  | 4.67 | 15 | 271-296(2.56) 379-407(3.30) 847-873(2.82) 915-947(0.43) 1138-1162(1.07) 1848-1871(1.07) 1978-2003(4.67) 2014-2039(2.50) 2078-2105(2.43) 3167-3195(1.81) 3295-3320(2.05) 3350-3375(1.89) : |
| gnl UG Hs#S4283977  | 0.2  | 1  | 226-253(0.20)                                                                                                                                                                             |
| gnl UG Hs#S3972972  | 2.78 | 4  | 590-615(1.30) 1002-1028(1.56) 2026-2051(2.78) 2419-2444(0.76)                                                                                                                             |
| gnl UG Hs#S1727331  | 5.04 | 5  | 103-129(1.24) 158-183(5.04) 281-307(1.18) 405-430(0.04) 692-717(0.24)                                                                                                                     |
| gnl UG Hs#S5931222  | 0.39 | 1  | 994-1019(0.39)                                                                                                                                                                            |
| gnl UG Hs#S3601761  | 0.81 | 2  | 638-666(0.81) 1194-1220(0.72)                                                                                                                                                             |
| gnl UG Hs#S7111382  | 1.21 | 2  | 135-161(0.52) 732-757(1.21)                                                                                                                                                               |
| gnl UG Hs#S5931242  | 2.39 | 2  | 1454-1479(2.39) 2240-2266(1.08)                                                                                                                                                           |
| gnl UG Hs#S2140455  | 1.43 | 1  | 89-114(1.43)                                                                                                                                                                              |
| gnl UG Hs#S4818526  | 1.11 | 1  | 143-169(1.11)                                                                                                                                                                             |
| gnl UG Hs#S4285293  | 4.14 | 4  | 691-716(4.14) 760-788(0.32) 2247-2274(1.59) 2990-3015(0.29)                                                                                                                               |
| gnl UG Hs#S2293183  | 5.82 | 2  | 793-819(5.82) 964-991(1.94)                                                                                                                                                               |
| gnl UG Hs#S2294208  | 6.18 | 1  | 1899-1925(6.18)                                                                                                                                                                           |
| gnl UG Hs#S4841650  | 1.94 | 1  | 229-254(1.94)                                                                                                                                                                             |
| gnl UG Hs#S4819134  | 3.77 | 10 | 205-230(0.48) 2125-2152(0.04) 2161-2186(2.39) 2322-2346(0.40) 2512-2538(1.25) 2572-2597(3.08) 2737-2763(0.17) 3169-3194(2.46) 3315-3341(3.77) 3361-3388(1.88)                             |
| gnl UG Hs#S1728333  | 3.01 | 3  | 361-386(0.94) 613-638(3.01) 660-685(1.97)                                                                                                                                                 |
| gnl UG Hs#S1730433  | 0.75 | 3  | 529-554(0.39) 1557-1583(0.75) 1661-1689(0.01)                                                                                                                                             |
| gnl UG Hs#S10832216 | 0.94 | 2  | 333-358(0.94) 1775-1800(0.52)                                                                                                                                                             |
| gnl UG Hs#S3601472  | 0.86 | 1  | 1-27(0.86)                                                                                                                                                                                |
| gnl UG Hs#S1727153  | 0.27 | 1  | 699-724(0.27)                                                                                                                                                                             |
| gnl UG Hs#S3437906  | 1.53 | 2  | 85-110(1.26) 311-336(1.53)                                                                                                                                                                |
| gnl UG Hs#S3219069  | 1.88 | 1  | 877-903(1.88)                                                                                                                                                                             |
| gnl UG Hs#S1727394  | 1.11 | 1  | 137-162(1.11)                                                                                                                                                                             |
| gnl UG Hs#S3438973  | 0.26 | 2  | 784-810(0.26) 918-946(0.20)                                                                                                                                                               |
| gnl UG Hs#S3355532  | 1.62 | 1  | 171-197(1.62)                                                                                                                                                                             |
| gnl UG Hs#S4807774  | 1.26 | 2  | 79-105(1.26) 178-204(0.76)                                                                                                                                                                |
| gnl UG Hs#S1727026  | 1.04 | 1  | 1322-1347(1.04)                                                                                                                                                                           |
| gnl UG Hs#S1824561  | 3.82 | 5  | 46-72(0.13) 948-973(3.82) 1459-1484(1.65) 1862-1887(0.47) 2537-2562(1.98)                                                                                                                 |
| gnl UG Hs#S2139526  | 9.02 | 2  | 988-1014(9.02) 2092-2118(0.86)                                                                                                                                                            |
| gnl UG Hs#S2293997  | 2.17 | 1  | 647-672(2.17)                                                                                                                                                                             |
| gnl UG Hs#S1731779  | 4.47 | 3  | 134-162(4.47) 770-798(2.04) 972-1001(0.03)                                                                                                                                                |
| gnl UG Hs#S3438967  | 3.14 | 4  | 229-255(3.14) 661-686(0.40) 1123-1148(1.98) 1723-1748(0.50)                                                                                                                               |
| gnl UG Hs#S2294638  | 0.72 | 2  | 344-369(0.72) 450-474(0.07)                                                                                                                                                               |
| gnl UG Hs#S5931259  | 1.17 | 1  | 269-294(1.17)                                                                                                                                                                             |

|                     |      |   |                                                                                                                   |
|---------------------|------|---|-------------------------------------------------------------------------------------------------------------------|
| gnl UG Hs#S1728815  | 4.33 | 3 | 59-84(0.03) 510-534(0.80) 888-914(4.33)                                                                           |
| gnl UG Hs#S2139083  | 0.46 | 1 | 512-537(0.46)                                                                                                     |
| gnl UG Hs#S4812258  | 1.46 | 1 | 144-169(1.46)                                                                                                     |
| gnl UG Hs#S1732028  | 2.4  | 1 | 1616-1642(2.40)                                                                                                   |
| gnl UG Hs#S4285066  | 0.57 | 1 | 470-495(0.57)                                                                                                     |
| gnl UG Hs#S2294017  | 1.82 | 4 | 65-91(0.40) 99-124(0.94) 795-820(1.82) 1784-1808(0.16)                                                            |
| gnl UG Hs#S4619041  | 0.76 | 2 | 1265-1291(0.18) 1298-1326(0.76)                                                                                   |
| gnl UG Hs#S1727016  | 1.44 | 1 | 137-162(1.44)                                                                                                     |
| gnl UG Hs#S3219621  | 1.78 | 1 | 29-54(1.78)                                                                                                       |
| gnl UG Hs#S1728584  | 0.72 | 1 | 1093-1118(0.72)                                                                                                   |
| gnl UG Hs#S4822793  | 1.04 | 5 | 553-578(0.49) 819-844(0.57) 1366-1390(0.15) 2099-2124(1.04) 2568-2596(0.08)                                       |
| gnl UG Hs#S1730344  | 1.46 | 1 | 1064-1089(1.46)                                                                                                   |
| gnl UG Hs#S3219057  | 1.17 | 1 | 353-381(1.17)                                                                                                     |
| gnl UG Hs#S3837783  | 0.33 | 1 | 299-324(0.33)                                                                                                     |
| gnl UG Hs#S1730950  | 2.86 | 6 | 229-254(1.34) 349-374(0.33) 390-416(2.86) 1000-1025(1.23) 2064-2090(1.55) 2118-2144(0.57)                         |
| gnl UG Hs#S3603841  | 2.37 | 7 | 1128-1153(0.84) 1473-1498(0.36) 1587-1614(0.30) 2317-2343(1.47) 2689-2716(2.37) 2860-2883(0.37) 3019-3047(0.59)   |
| gnl UG Hs#S11046542 | 3.44 | 2 | 165-190(3.44) 1687-1713(0.86)                                                                                     |
| gnl UG Hs#S3973026  | 2.08 | 2 | 424-449(2.08) 810-839(1.15)                                                                                       |
| gnl UG Hs#S2139450  | 4.48 | 8 | 23-48(3.11) 193-219(2.97) 436-464(1.17) 523-549(0.72) 753-778(0.82) 909-937(4.48) 1104-1129(0.76) 1202-1230(1.83) |
| gnl UG Hs#S1727033  | 3.3  | 3 | 132-157(3.30) 329-356(2.02) 791-816(1.30)                                                                         |
| gnl UG Hs#S2294412  | 1.55 | 3 | 75-101(1.40) 1052-1077(0.21) 2200-2227(1.55)                                                                      |
| gnl UG Hs#S4810981  | 6.14 | 2 | 1090-1116(6.14) 1474-1502(3.23)                                                                                   |
| gnl UG Hs#S1730893  | 0.1  | 2 | 491-516(0.07) 690-718(0.10)                                                                                       |
| gnl UG Hs#S3219624  | 1.21 | 1 | 592-617(1.21)                                                                                                     |
| gnl UG Hs#S3439111  | 4.97 | 7 | 335-360(1.07) 378-403(0.18) 892-917(4.97) 1532-1557(3.23) 2207-2234(0.34) 2727-2754(2.01) 2837-2862(1.13)         |
| gnl UG Hs#S4554605  | 3.89 | 1 | 111-137(3.89)                                                                                                     |
| gnl UG Hs#S1730217  | 4.04 | 4 | 18-45(1.09) 850-875(1.00) 931-958(4.04) 1818-1843(2.56)                                                           |
| gnl UG Hs#S3355636  | 1.94 | 1 | 109-136(1.94)                                                                                                     |
| gnl UG Hs#S4283227  | 1.15 | 1 | 57-82(1.15)                                                                                                       |
| gnl UG Hs#S4614401  | 2.65 | 1 | 2452-2477(2.65)                                                                                                   |
| gnl UG Hs#S1726823  | 1.47 | 1 | 496-524(1.47)                                                                                                     |
| gnl UG Hs#S1730435  | 3.23 | 3 | 48-74(1.08) 89-114(3.23) 151-176(2.23)                                                                            |
| gnl UG Hs#S4546309  | 0.82 | 1 | 3303-3329(0.82)                                                                                                   |
| gnl UG Hs#S7112413  | 0.18 | 1 | 213-238(0.18)                                                                                                     |
| gnl UG Hs#S4001906  | 1.34 | 2 | 94-120(1.34) 456-481(0.07)                                                                                        |
| gnl UG Hs#S1729833  | 4.76 | 4 | 517-543(1.30) 756-784(1.98) 820-845(0.20) 1024-1052(4.76)                                                         |
| gnl UG Hs#S2139459  | 0.04 | 2 | 1469-1492(0.04) 4058-4084(0.04)                                                                                   |
| gnl UG Hs#S15636105 | 0.69 | 1 | 444-469(0.69)                                                                                                     |
| gnl UG Hs#S2139877  | 0.91 | 2 | 18-44(0.91) 100-128(0.89)                                                                                         |
| gnl UG Hs#S14802444 | 1.87 | 1 | 1119-1144(1.87)                                                                                                   |
| gnl UG Hs#S2293511  | 4.3  | 4 | 687-715(1.64) 1154-1179(0.65) 1377-1403(1.90) 1585-1610(4.30)                                                     |
| gnl UG Hs#S2139743  | 2.88 | 2 | 98-126(2.88) 384-409(0.15)                                                                                        |
| gnl UG Hs#S2139146  | 0.62 | 1 | 844-870(0.62)                                                                                                     |
| gnl UG Hs#S4554435  | 2.46 | 1 | 1490-1517(2.46)                                                                                                   |
| gnl UG Hs#S1727417  | 1.14 | 1 | 1116-1144(1.14)                                                                                                   |
| gnl UG Hs#S4828754  | 4.75 | 5 | 25-50(1.07) 69-94(4.75) 115-140(0.72) 240-265(3.00) 273-299(0.09)                                                 |
| gnl UG Hs#S5978806  | 2.04 | 2 | 209-234(1.72) 242-267(2.04)                                                                                       |
| gnl UG Hs#S5979273  | 1.23 | 1 | 47-73(1.23)                                                                                                       |
| gnl UG Hs#S1729951  | 2.04 | 2 | 275-301(2.04) 525-553(0.20)                                                                                       |
| gnl UG Hs#S7111054  | 1.62 | 3 | 289-316(0.29) 356-379(1.62) 1144-1171(0.23)                                                                       |
| gnl UG Hs#S4807566  | 0.87 | 1 | 160-185(0.87)                                                                                                     |
| gnl UG Hs#S5860365  | 1.62 | 1 | 792-818(1.62)                                                                                                     |
| gnl UG Hs#S6693104  | 1.54 | 1 | 61-88(1.54)                                                                                                       |
| gnl UG Hs#S1728471  | 1.3  | 3 | 57-83(0.17) 101-126(0.53) 184-210(1.30)                                                                           |

|                     |      |                                                                                                           |
|---------------------|------|-----------------------------------------------------------------------------------------------------------|
| gnl UG Hs#S3218904  | 3.37 | 1 44-70(3.37)                                                                                             |
| gnl UG Hs#S1726508  | 0.94 | 2 23-48(0.58) 84-109(0.94)                                                                                |
| gnl UG Hs#S2294261  | 6.73 | 5 129-155(6.73) 764-789(0.46) 939-964(0.82) 1031-1056(0.98) 1118-1146(0.62)                               |
| gnl UG Hs#S1728932  | 2.46 | 3 1093-1118(2.46) 1410-1435(1.40) 1875-1901(1.60)                                                         |
| gnl UG Hs#S4807971  | 2.23 | 3 100-125(2.23) 149-175(1.49) 1149-1174(1.50)                                                             |
| gnl UG Hs#S7113237  | 1    | 1 841-865(1.00)                                                                                           |
| gnl UG Hs#S1727884  | 0.04 | 1 204-229(0.04)                                                                                           |
| gnl UG Hs#S3973105  | 1    | 1 395-419(1.00)                                                                                           |
| gnl UG Hs#S4553484  | 1.62 | 5 538-566(1.62) 596-622(0.12) 1038-1066(0.01) 1244-1271(0.79) 1283-1307(0.61)                             |
| gnl UG Hs#S3814591  | 2.62 | 1 66-91(2.62)                                                                                             |
| gnl UG Hs#S1731935  | 1.04 | 2 1152-1180(0.04) 2934-2959(1.04)                                                                         |
| gnl UG Hs#S4435926  | 1.98 | 7 363-388(1.98) 392-416(0.57) 565-593(0.49) 735-761(0.65) 1021-1046(0.35) 1470-1498(1.30) 1611-1637(1.20) |
| gnl UG Hs#S4807549  | 1.72 | 5 141-171(0.20) 242-267(0.15) 379-404(1.72) 551-577(1.24) 855-881(1.08)                                   |
| gnl UG Hs#S1971527  | 1.43 | 4 2044-2069(0.98) 2190-2215(0.20) 2308-2335(0.62) 2351-2376(1.43)                                         |
| gnl UG Hs#S2139558  | 2.4  | 4 575-600(2.40) 1063-1088(1.81) 1282-1307(0.63) 1322-1348(1.62)                                           |
| gnl UG Hs#S1726653  | 0.5  | 2 1837-1862(0.17) 1947-1973(0.50)                                                                         |
| gnl UG Hs#S4807518  | 1.4  | 2 739-762(1.40) 1202-1227(0.26)                                                                           |
| gnl UG Hs#S2293970  | 3.17 | 1 77-103(3.17)                                                                                            |
| gnl UG Hs#S1731388  | 4.56 | 2 1435-1460(4.56) 1568-1594(1.27)                                                                         |
| gnl UG Hs#S1727851  | 1.97 | 2 343-369(1.94) 404-429(1.97)                                                                             |
| gnl UG Hs#S1726664  | 0.98 | 1 120-145(0.98)                                                                                           |
| gnl UG Hs#S2139950  | 2.21 | 3 456-481(0.53) 500-525(0.81) 985-1013(2.21)                                                              |
| gnl UG Hs#S4807230  | 1.72 | 4 833-858(0.56) 874-899(0.72) 942-968(1.72) 1089-1112(1.59)                                               |
| gnl UG Hs#S1728942  | 1.84 | 2 694-720(1.84) 772-795(1.79)                                                                             |
| gnl UG Hs#S2138800  | 3.08 | 5 950-975(3.08) 1693-1721(0.11) 2262-2286(1.85) 2657-2682(3.04) 3478-3503(2.98)                           |
| gnl UG Hs#S3219319  | 1.65 | 4 988-1016(0.26) 1230-1255(0.72) 1287-1312(1.65) 1328-1357(0.01)                                          |
| gnl UG Hs#S3438748  | 0.23 | 1 658-684(0.23)                                                                                           |
| gnl UG Hs#S2140220  | 0.1  | 1 184-208(0.10)                                                                                           |
| gnl UG Hs#S2293310  | 1.5  | 1 158-183(1.50)                                                                                           |
| gnl UG Hs#S1729743  | 0.55 | 1 186-211(0.55)                                                                                           |
| gnl UG Hs#S11154069 | 3.27 | 4 201-225(0.72) 552-578(3.27) 1056-1081(2.52) 1194-1221(0.00)                                             |
| gnl UG Hs#S3438372  | 2.06 | 1 425-451(2.06)                                                                                           |
| gnl UG Hs#S4821487  | 1.05 | 1 478-505(1.05)                                                                                           |
| gnl UG Hs#S5931236  | 0.26 | 1 418-443(0.26)                                                                                           |
| gnl UG Hs#S5978404  | 2.33 | 1 385-410(2.33)                                                                                           |
| gnl UG Hs#S3355567  | 1.07 | 1 1092-1117(1.07)                                                                                         |
| gnl UG Hs#S10832048 | 0.62 | 1 391-418(0.62)                                                                                           |
| gnl UG Hs#S4809864  | 2.07 | 6 670-695(1.94) 787-812(2.07) 930-953(0.97) 1857-1882(1.30) 2084-2109(0.24) 3048-3073(1.78)               |
| gnl UG Hs#S1728940  | 1.88 | 2 567-592(1.78) 774-799(1.88)                                                                             |
| gnl UG Hs#S2139475  | 3.34 | 1 580-605(3.34)                                                                                           |
| gnl UG Hs#S4554602  | 1.43 | 1 619-645(1.43)                                                                                           |
| gnl UG Hs#S4807941  | 0.3  | 1 90-121(0.30)                                                                                            |
| gnl UG Hs#S4623518  | 2.17 | 2 3134-3159(2.17) 3186-3211(1.53)                                                                         |
| gnl UG Hs#S2140612  | 0.79 | 2 167-192(0.79) 359-385(0.55)                                                                             |
| gnl UG Hs#S2139818  | 1.21 | 2 729-753(1.21) 788-813(0.24)                                                                             |
| gnl UG Hs#S3438659  | 0.57 | 1 728-756(0.57)                                                                                           |
| gnl UG Hs#S3603040  | 1.65 | 6 174-200(1.65) 147-171(0.09) 204-232(0.40) 286-311(0.33) 1183-1208(1.34) 1910-1935(0.89)                 |
| gnl UG Hs#S1728904  | 1.84 | 2 1209-1237(1.84) 1344-1369(0.87)                                                                         |
| gnl UG Hs#S1730063  | 2.48 | 2 489-515(2.48) 530-556(1.18)                                                                             |
| gnl UG Hs#S3438696  | 5.15 | 3 774-800(2.72) 860-885(5.15) 901-926(2.17)                                                               |
| gnl UG Hs#S1731891  | 0.48 | 1 1415-1440(0.48)                                                                                         |
| gnl UG Hs#S3438834  | 2.48 | 2 119-146(0.76) 305-333(2.48)                                                                             |
| gnl UG Hs#S4841562  | 4.97 | 6 229-254(4.97) 277-302(0.30) 757-783(0.10) 798-823(0.40) 874-899(3.21) 918-943(0.75)                     |
| gnl UG Hs#S2140320  | 3.81 | 5 309-335(3.66) 866-891(0.62) 1073-1101(1.30) 1287-1312(1.50) 1375-1403(3.81)                             |

|                     |      |                                                                                                 |
|---------------------|------|-------------------------------------------------------------------------------------------------|
| gnl UG Hs#S2140689  | 0.43 | 1 647-672(0.43)                                                                                 |
| gnl UG Hs#S2294392  | 1.04 | 3 168-193(1.04) 1781-1807(0.47) 1833-1859(0.39)                                                 |
| gnl UG Hs#S1726585  | 2.68 | 5 127-152(2.68) 380-406(1.17) 563-589(0.04) 603-629(1.50) 1211-1236(2.46)                       |
| gnl UG Hs#S2293602  | 3.89 | 1 285-310(3.89)                                                                                 |
| gnl UG Hs#S2293172  | 1.29 | 1 127-152(1.29)                                                                                 |
| gnl UG Hs#S3601636  | 3.67 | 1 20-46(3.67)                                                                                   |
| gnl UG Hs#S1732385  | 0.29 | 1 540-565(0.29)                                                                                 |
| gnl UG Hs#S1729638  | 3.72 | 2 316-342(0.41) 1400-1427(3.72)                                                                 |
| gnl UG Hs#S3333477  | 3.78 | 1 1717-1742(3.78)                                                                               |
| gnl UG Hs#S2139841  | 2.4  | 5 355-381(0.08) 655-680(0.17) 797-822(0.30) 894-919(0.17) 1054-1079(2.40)                       |
| gnl UG Hs#S1727484  | 0.66 | 4 442-469(0.66) 840-865(0.57) 1214-1242(0.62) 1252-1278(0.11)                                   |
| gnl UG Hs#S2293415  | 3.3  | 2 639-665(3.30) 2151-2181(0.34)                                                                 |
| gnl UG Hs#S10832742 | 2.48 | 4 413-438(0.58) 565-592(2.48) 1020-1045(1.82) 2173-2199(0.72)                                   |
| gnl UG Hs#S3438951  | 2.3  | 6 539-564(1.34) 852-878(0.11) 1046-1072(0.76) 1139-1164(2.30) 1186-1212(0.21) 1213-1239(0.27)   |
| gnl UG Hs#S1824306  | 1.55 | 1 55-83(1.55)                                                                                   |
| gnl UG Hs#S1731910  | 0.2  | 1 101-128(0.20)                                                                                 |
| gnl UG Hs#S4818038  | 2.11 | 4 278-303(0.83) 1552-1577(2.11) 1693-1718(0.33) 1930-1955(0.50)                                 |
| gnl UG Hs#S4809644  | 1.72 | 5 471-496(0.13) 527-552(0.01) 661-686(0.87) 840-866(1.72) 1044-1068(0.89)                       |
| gnl UG Hs#S1727227  | 2.08 | 1 283-308(2.08)                                                                                 |
| gnl UG Hs#S1728325  | 1.98 | 3 477-503(1.27) 521-549(1.57) 655-680(1.98)                                                     |
| gnl UG Hs#S4618671  | 1.07 | 1 1081-1106(1.07)                                                                               |
| gnl UG Hs#S1729791  | 2.2  | 1 497-523(2.20)                                                                                 |
| gnl UG Hs#S2294187  | 0.01 | 1 1633-1661(0.01)                                                                               |
| gnl UG Hs#S15631547 | 2.3  | 3 22-47(0.16) 327-353(2.30) 584-608(0.14)                                                       |
| gnl UG Hs#S3219746  | 2.94 | 2 1723-1749(0.39) 2381-2406(2.94)                                                               |
| gnl UG Hs#S4826390  | 4.59 | 3 186-211(0.08) 314-340(1.01) 679-707(4.59)                                                     |
| gnl UG Hs#S1730579  | 0.67 | 1 378-404(0.67)                                                                                 |
| gnl UG Hs#S2139682  | 2.79 | 6 406-431(2.79) 635-660(0.14) 1627-1652(2.67) 1959-1986(0.58) 2299-2325(2.72) 2512-2537(1.14)   |
| gnl UG Hs#S3220077  | 2.73 | 4 64-91(1.28) 274-302(1.90) 379-404(0.91) 838-867(2.73)                                         |
| gnl UG Hs#S3973111  | 0.18 | 1 719-747(0.18)                                                                                 |
| gnl UG Hs#S2294217  | 2.36 | 2 83-111(2.36) 163-189(1.17)                                                                    |
| gnl UG Hs#S2293403  | 0.3  | 1 1234-1257(0.30)                                                                               |
| gnl UG Hs#S1730767  | 2.58 | 1 229-254(2.58)                                                                                 |
| gnl UG Hs#S1731122  | 1.33 | 1 458-483(1.33)                                                                                 |
| gnl UG Hs#S14802393 | 0.46 | 1 1092-1117(0.46)                                                                               |
| gnl UG Hs#S2140373  | 2.52 | 1 216-241(2.52)                                                                                 |
| gnl UG Hs#S2294379  | 5.98 | 2 1250-1276(0.34) 1403-1428(5.98)                                                               |
| gnl UG Hs#S4546007  | 2.26 | 4 23-48(2.26) 209-234(1.78) 549-574(1.98) 1040-1065(0.10)                                       |
| gnl UG Hs#S1824470  | 1.93 | 1 340-366(1.93)                                                                                 |
| gnl UG Hs#S4554624  | 1.17 | 4 703-729(0.23) 736-761(0.30) 1326-1352(1.17) 1393-1420(0.67)                                   |
| gnl UG Hs#S1731607  | 4.27 | 3 181-206(0.58) 343-368(0.46) 475-503(4.27)                                                     |
| gnl UG Hs#S5978544  | 3.36 | 4 945-970(0.26) 1070-1096(3.36) 1116-1141(1.94) 1227-1252(3.11)                                 |
| gnl UG Hs#S7110440  | 4.08 | 3 134-160(1.30) 894-920(4.08) 1268-1295(0.30)                                                   |
| gnl UG Hs#S4284738  | 1.27 | 4 1018-1043(0.36) 1253-1279(1.27) 1427-1452(1.23) 1849-1875(0.28)                               |
| gnl UG Hs#S1727317  | 0.52 | 1 339-366(0.52)                                                                                 |
| gnl UG Hs#S15632430 | 1.15 | 3 770-798(0.01) 883-908(1.15) 1124-1150(0.30)                                                   |
| gnl UG Hs#S3219382  | 0.3  | 1 160-185(0.30)                                                                                 |
| gnl UG Hs#S4631450  | 4.72 | 6 319-344(0.34) 1123-1148(3.36) 1292-1317(1.57) 1810-1836(0.77) 2820-2845(1.03) 3101-3126(4.72) |
| gnl UG Hs#S2140582  | 1.41 | 2 74-101(0.43) 633-659(1.41)                                                                    |
| gnl UG Hs#S2293210  | 0.68 | 3 78-104(0.68) 280-305(0.07) 369-395(0.21)                                                      |
| gnl UG Hs#S3219521  | 0.94 | 2 692-718(0.94) 1110-1135(0.26)                                                                 |
| gnl UG Hs#S4546234  | 1.02 | 2 46-72(1.02) 170-196(0.33)                                                                     |
| gnl UG Hs#S1728707  | 2.5  | 1 726-751(2.50)                                                                                 |
| gnl UG Hs#S1731505  | 3.36 | 3 72-97(2.08) 169-194(1.20) 1602-1630(3.36)                                                     |

|                     |      |                                                                                                                                             |
|---------------------|------|---------------------------------------------------------------------------------------------------------------------------------------------|
| gnl UG Hs#S1727244  | 0.22 | 1 22-48(0.22)                                                                                                                               |
| gnl UG Hs#S1730668  | 1.54 | 1 677-703(1.54)                                                                                                                             |
| gnl UG Hs#S4545952  | 2.47 | 2 140-163(0.30) 222-247(2.47)                                                                                                               |
| gnl UG Hs#S3619221  | 0.83 | 4 33-58(0.11) 1651-1676(0.23) 1717-1743(0.83) 1767-1795(0.30)                                                                               |
| gnl UG Hs#S2293742  | 2.09 | 5 52-77(1.07) 170-198(0.75) 320-345(1.04) 493-519(1.79) 758-787(2.09)                                                                       |
| gnl UG Hs#S2140533  | 1.71 | 1 729-756(1.71)                                                                                                                             |
| gnl UG Hs#S1727886  | 0.21 | 1 741-767(0.21)                                                                                                                             |
| gnl UG Hs#S5860325  | 4.75 | 1 319-345(4.75)                                                                                                                             |
| gnl UG Hs#S4046160  | 3.99 | 5 71-96(0.26) 143-168(1.89) 175-203(0.62) 228-254(3.99) 259-285(0.89)                                                                       |
| gnl UG Hs#S2294147  | 0.08 | 1 564-590(0.08)                                                                                                                             |
| gnl UG Hs#S3355562  | 1.4  | 1 458-484(1.40)                                                                                                                             |
| gnl UG Hs#S2294470  | 2.07 | 2 216-240(2.07) 1402-1429(0.23)                                                                                                             |
| gnl UG Hs#S1729916  | 2.6  | 1 661-686(2.60)                                                                                                                             |
| gnl UG Hs#S1731886  | 2.39 | 3 662-687(2.39) 737-762(1.97) 828-854(1.50)                                                                                                 |
| gnl UG Hs#S3219246  | 3.3  | 1 992-1017(3.30)                                                                                                                            |
| gnl UG Hs#S5517489  | 0.69 | 1 1854-1880(0.69)                                                                                                                           |
| gnl UG Hs#S4631029  | 3.21 | 4 686-711(3.21) 1313-1338(1.26) 1805-1829(0.36) 1977-2003(0.90)                                                                             |
| gnl UG Hs#S4045632  | 2.08 | 2 493-518(0.98) 1003-1029(2.08)                                                                                                             |
| gnl UG Hs#S4810003  | 2.6  | 2 361-387(2.60) 622-647(0.46)                                                                                                               |
| gnl UG Hs#S1728532  | 0.37 | 1 1468-1496(0.37)                                                                                                                           |
| gnl UG Hs#S1732268  | 2.91 | 8 227-252(0.08) 570-598(1.11) 1039-1065(1.21) 1252-1278(0.10) 3269-3295(1.17) 3534-3560(2.91) 3742-3768(1.82) 3883-3908(1.40)               |
| gnl UG Hs#S2334489  | 0.84 | 1 1530-1556(0.84)                                                                                                                           |
| gnl UG Hs#S1731291  | 1.59 | 1 264-292(1.59)                                                                                                                             |
| gnl UG Hs#S1730028  | 1.46 | 2 758-784(0.72) 808-833(1.46)                                                                                                               |
| gnl UG Hs#S1727132  | 2.89 | 2 1290-1315(2.89) 1330-1355(0.40)                                                                                                           |
| gnl UG Hs#S1730276  | 2.23 | 4 1729-1754(0.85) 2656-2683(1.79) 3171-3196(0.20) 3699-3725(2.23)                                                                           |
| gnl UG Hs#S1726967  | 1.91 | 1 517-545(1.91)                                                                                                                             |
| gnl UG Hs#S1729386  | 0.92 | 2 986-1012(0.30) 1108-1137(0.92)                                                                                                            |
| gnl UG Hs#S3973066  | 1.43 | 3 130-156(1.27) 295-320(1.43) 334-362(0.84)                                                                                                 |
| gnl UG Hs#S3855031  | 0.21 | 1 1646-1671(0.21)                                                                                                                           |
| gnl UG Hs#S4546109  | 4.85 | 4 1067-1091(2.36) 1414-1439(4.85) 1490-1516(1.33) 1615-1641(1.40)                                                                           |
| gnl UG Hs#S1728539  | 5.14 | 9 418-448(0.58) 488-514(0.83) 742-767(0.21) 1156-1182(5.14) 1292-1315(0.72) 1378-1403(0.11) 1684-1709(1.50) 1714-1739(2.89) 1990-2016(0.17) |
| gnl UG Hs#S7111636  | 2.97 | 3 22-47(0.05) 988-1013(0.30) 1014-1038(2.97)                                                                                                |
| gnl UG Hs#S4621002  | 3.07 | 3 471-499(3.07) 670-696(0.49) 1491-1516(0.84)                                                                                               |
| gnl UG Hs#S4546164  | 1.81 | 4 1493-1522(1.30) 1891-1919(0.17) 2034-2060(0.94) 2144-2169(1.81)                                                                           |
| gnl UG Hs#S2139546  | 2.22 | 1 2404-2427(2.22)                                                                                                                           |
| gnl UG Hs#S4284418  | 1.98 | 4 138-164(1.98) 624-649(1.53) 664-689(0.41) 838-865(0.29)                                                                                   |
| gnl UG Hs#S2138844  | 3.57 | 1 502-527(3.57)                                                                                                                             |
| gnl UG Hs#S4630868  | 2.62 | 4 752-778(2.21) 1014-1040(2.08) 1074-1097(0.71) 1575-1603(2.62)                                                                             |
| gnl UG Hs#S7110278  | 0.13 | 1 504-529(0.13)                                                                                                                             |
| gnl UG Hs#S3814692  | 1.43 | 1 67-92(1.43)                                                                                                                               |
| gnl UG Hs#S2140467  | 2.66 | 5 327-353(1.21) 394-420(1.23) 440-468(2.66) 1586-1611(1.72) 1643-1668(0.66)                                                                 |
| gnl UG Hs#S4284711  | 2.26 | 3 163-188(0.30) 1653-1678(2.26) 1953-1979(0.50)                                                                                             |
| gnl UG Hs#S2649394  | 0.49 | 1 43-68(0.49)                                                                                                                               |
| gnl UG Hs#S3218916  | 0.82 | 2 152-177(0.17) 1862-1888(0.82)                                                                                                             |
| gnl UG Hs#S1731583  | 2.65 | 2 39-66(0.87) 242-267(2.65)                                                                                                                 |
| gnl UG Hs#S1731125  | 0.5  | 1 41-67(0.50)                                                                                                                               |
| gnl UG Hs#S3438535  | 1.97 | 1 412-437(1.97)                                                                                                                             |
| gnl UG Hs#S1824495  | 1.23 | 3 586-612(1.23) 2038-2066(0.71) 2589-2613(0.08)                                                                                             |
| gnl UG Hs#S1731249  | 6.79 | 4 115-143(1.40) 360-385(6.79) 474-498(6.06) 551-579(1.30)                                                                                   |
| gnl UG Hs#S4824008  | 2.53 | 3 816-841(2.53) 1242-1267(1.08) 1323-1347(0.72)                                                                                             |
| gnl UG Hs#S3601565  | 1.72 | 1 298-323(1.72)                                                                                                                             |
| gnl UG Hs#S3220050  | 2.79 | 1 802-828(2.79)                                                                                                                             |
| gnl UG Hs#S15640010 | 1.4  | 1 182-207(1.40)                                                                                                                             |

|                     |      |    |                                                                                                                                                                                          |
|---------------------|------|----|------------------------------------------------------------------------------------------------------------------------------------------------------------------------------------------|
| gnl UG Hs#S2293672  | 1.08 | 3  | 377-400(0.46) 523-549(1.08) 594-619(0.53)                                                                                                                                                |
| gnl UG Hs#S1263833  | 1.04 | 1  | 201-226(1.04)                                                                                                                                                                            |
| gnl UG Hs#S3438499  | 1.52 | 1  | 206-234(1.52)                                                                                                                                                                            |
| gnl UG Hs#S4617323  | 3.36 | 4  | 698-723(1.62) 760-785(3.36) 1142-1168(1.72) 1307-1333(0.43)                                                                                                                              |
| gnl UG Hs#S1726689  | 2.62 | 3  | 726-751(2.62) 828-853(1.94) 1520-1545(0.91)                                                                                                                                              |
| gnl UG Hs#S3880993  | 1.52 | 2  | 325-350(0.30) 978-1004(1.52)                                                                                                                                                             |
| gnl UG Hs#S1731054  | 1.98 | 4  | 912-936(0.09) 1177-1203(1.98) 1576-1602(0.08) 1659-1684(1.98)                                                                                                                            |
| gnl UG Hs#S15638190 | 2.42 | 2  | 73-98(0.75) 101-123(2.42)                                                                                                                                                                |
| gnl UG Hs#S4816599  | 1.07 | 2  | 230-258(1.07) 320-346(0.20)                                                                                                                                                              |
| gnl UG Hs#S1730195  | 0.49 | 2  | 189-214(0.49) 379-404(0.40)                                                                                                                                                              |
| gnl UG Hs#S3817887  | 0.24 | 1  | 95-120(0.24)                                                                                                                                                                             |
| gnl UG Hs#S1731286  | 2.65 | 1  | 405-430(2.65)                                                                                                                                                                            |
| gnl UG Hs#S4807743  | 2.98 | 7  | 290-315(0.20) 496-522(2.98) 726-751(0.08) 838-863(1.72) 902-927(0.40) 1028-1052(0.70) 1001-1026(0.08)                                                                                    |
| gnl UG Hs#S3335562  | 0.44 | 1  | 140-166(0.44)                                                                                                                                                                            |
| gnl UG Hs#S3547094  | 1.16 | 3  | 35-60(1.04) 269-294(1.16) 906-933(0.33)                                                                                                                                                  |
| gnl UG Hs#S1728379  | 0.53 | 2  | 51-76(0.36) 77-102(0.53)                                                                                                                                                                 |
| gnl UG Hs#S4807737  | 0.5  | 1  | 97-123(0.50)                                                                                                                                                                             |
| gnl UG Hs#S4827272  | 2.9  | 2  | 300-325(2.36) 1581-1606(2.90)                                                                                                                                                            |
| gnl UG Hs#S4828229  | 1.3  | 3  | 349-374(1.30) 1092-1117(0.82) 2054-2082(0.76)                                                                                                                                            |
| gnl UG Hs#S10831939 | 0.72 | 1  | 208-233(0.72)                                                                                                                                                                            |
| gnl UG Hs#S14802446 | 1.94 | 1  | 687-712(1.94)                                                                                                                                                                            |
| gnl UG Hs#S3438910  | 0.17 | 1  | 150-176(0.17)                                                                                                                                                                            |
| gnl UG Hs#S2293246  | 1.04 | 1  | 428-454(1.04)                                                                                                                                                                            |
| gnl UG Hs#S6664840  | 4.63 | 1  | 684-710(4.63)                                                                                                                                                                            |
| gnl UG Hs#S3601556  | 0.2  | 1  | 405-430(0.20)                                                                                                                                                                            |
| gnl UG Hs#S7111917  | 1.72 | 2  | 79-104(1.72) 1247-1275(0.52)                                                                                                                                                             |
| gnl UG Hs#S1726455  | 1.84 | 1  | 216-241(1.84)                                                                                                                                                                            |
| gnl UG Hs#S2140219  | 0.15 | 1  | 296-321(0.15)                                                                                                                                                                            |
| gnl UG Hs#S4435742  | 0.17 | 1  | 1027-1053(0.17)                                                                                                                                                                          |
| gnl UG Hs#S1729550  | 0.4  | 1  | 315-340(0.40)                                                                                                                                                                            |
| gnl UG Hs#S4823145  | 0.62 | 2  | 1243-1267(0.17) 1293-1321(0.62)                                                                                                                                                          |
| gnl UG Hs#S1729973  | 3.3  | 3  | 121-147(1.53) 259-285(0.37) 506-531(3.30)                                                                                                                                                |
| gnl UG Hs#S3438601  | 2.5  | 5  | 156-181(0.46) 213-238(1.17) 715-741(0.11) 860-888(0.33) 1041-1066(2.50)                                                                                                                  |
| gnl UG Hs#S1727894  | 2.17 | 1  | 43-69(2.17)                                                                                                                                                                              |
| gnl UG Hs#S3601678  | 1.3  | 4  | 672-696(0.14) 1844-1869(1.30) 2226-2254(1.30) 2477-2503(0.17)                                                                                                                            |
| gnl UG Hs#S3439010  | 3.89 | 3  | 118-143(1.39) 156-182(3.89) 690-718(3.71)                                                                                                                                                |
| gnl UG Hs#S2294295  | 1.86 | 5  | 486-511(0.23) 595-620(0.08) 658-683(0.29) 972-995(0.42) 1140-1166(1.86)                                                                                                                  |
| gnl UG Hs#S4829321  | 4.42 | 7  | 345-372(3.06) 787-812(4.42) 1097-1122(0.01) 1350-1375(1.36) 1613-1638(1.33) 2230-2256(2.57) 3139-3164(0.30)                                                                              |
| gnl UG Hs#S4435609  | 0.04 | 1  | 107-133(0.04)                                                                                                                                                                            |
| gnl UG Hs#S3219907  | 1.99 | 1  | 148-176(1.99)                                                                                                                                                                            |
| gnl UG Hs#S1728730  | 0.45 | 1  | 168-195(0.45)                                                                                                                                                                            |
| gnl UG Hs#S3219578  | 1.75 | 1  | 218-243(1.75)                                                                                                                                                                            |
| gnl UG Hs#S1732436  | 2.43 | 1  | 300-323(2.43)                                                                                                                                                                            |
| gnl UG Hs#S1726826  | 3.39 | 1  | 1106-1132(3.39)                                                                                                                                                                          |
| gnl UG Hs#S2294281  | 0.43 | 1  | 150-175(0.43)                                                                                                                                                                            |
| gnl UG Hs#S5931071  | 0.04 | 1  | 176-204(0.04)                                                                                                                                                                            |
| gnl UG Hs#S2138827  | 0.69 | 1  | 281-306(0.69)                                                                                                                                                                            |
| gnl UG Hs#S2139497  | 3.3  | 14 | 184-209(0.94) 838-864(3.30) 1031-1057(0.72) 1571-1596(0.88) 2449-2473(1.47) 2678-2703(0.48) 2839-2864(0.07) 3029-3054(2.53) 3434-3459(1.25) 3996-4019(0.62) 4209-4234(1.37) 4387-4413(0) |
| gnl UG Hs#S3219956  | 0.37 | 1  | 235-260(0.37)                                                                                                                                                                            |
| gnl UG Hs#S2139061  | 2.17 | 1  | 463-488(2.17)                                                                                                                                                                            |
| gnl UG Hs#S1727927  | 1.78 | 1  | 33-58(1.78)                                                                                                                                                                              |
| gnl UG Hs#S3547224  | 5.2  | 1  | 598-626(5.20)                                                                                                                                                                            |
| gnl UG Hs#S14272733 | 1.48 | 3  | 858-882(0.33) 1636-1664(0.44) 1823-1848(1.48)                                                                                                                                            |
| gnl UG Hs#S3438608  | 1.84 | 1  | 205-231(1.84)                                                                                                                                                                            |

|                     |      |                                                                                                 |
|---------------------|------|-------------------------------------------------------------------------------------------------|
| gnl UG Hs#S4807820  | 1.94 | 2 238-263(1.94) 659-684(0.08)                                                                   |
| gnl UG Hs#S1824549  | 0.75 | 1 406-431(0.75)                                                                                 |
| gnl UG Hs#S3993307  | 4.14 | 4 60-85(2.39) 484-510(4.14) 609-634(0.40) 1060-1086(0.23)                                       |
| gnl UG Hs#S2293713  | 0.04 | 1 819-847(0.04)                                                                                 |
| gnl UG Hs#S1727277  | 1.37 | 3 54-79(0.23) 903-929(0.39) 1459-1485(1.37)                                                     |
| gnl UG Hs#S4044896  | 3.97 | 3 773-798(1.76) 1155-1180(3.97) 1266-1292(2.36)                                                 |
| gnl UG Hs#S4811632  | 1.94 | 5 273-298(1.40) 509-535(1.50) 739-764(0.72) 782-807(0.82) 1042-1067(1.94)                       |
| gnl UG Hs#S1731872  | 0.55 | 1 605-629(0.55)                                                                                 |
| gnl UG Hs#S5931074  | 2.58 | 3 621-646(2.20) 655-680(2.58) 729-754(0.75)                                                     |
| gnl UG Hs#S3219507  | 1.26 | 2 198-223(1.26) 2057-2082(0.79)                                                                 |
| gnl UG Hs#S4807901  | 2.36 | 2 89-114(2.36) 895-922(0.14)                                                                    |
| gnl UG Hs#S10831568 | 0.39 | 2 862-888(0.39) 1336-1365(0.39)                                                                 |
| gnl UG Hs#S4828339  | 0.04 | 1 228-251(0.04)                                                                                 |
| gnl UG Hs#S4826558  | 0.86 | 4 2065-2093(0.17) 2106-2132(0.86) 2190-2215(0.72) 3157-3183(0.17)                               |
| gnl UG Hs#S1726458  | 0.08 | 1 791-817(0.08)                                                                                 |
| gnl UG Hs#S2139823  | 1.65 | 5 122-148(0.01) 386-411(1.26) 644-669(0.52) 749-772(0.88) 1054-1079(1.65)                       |
| gnl UG Hs#S4825774  | 0.2  | 1 1206-1231(0.20)                                                                               |
| gnl UG Hs#S3619667  | 1.57 | 3 131-159(1.48) 400-425(0.84) 459-487(1.57)                                                     |
| gnl UG Hs#S4809932  | 0.5  | 1 1038-1063(0.50)                                                                               |
| gnl UG Hs#S3219413  | 1.57 | 2 598-623(0.72) 696-722(1.57)                                                                   |
| gnl UG Hs#S4284863  | 1.49 | 2 4510-4538(1.49) 5496-5523(0.51)                                                               |
| gnl UG Hs#S3439023  | 0.62 | 1 12-37(0.62)                                                                                   |
| gnl UG Hs#S14273449 | 0.11 | 1 52-77(0.11)                                                                                   |
| gnl UG Hs#S4426438  | 0.42 | 1 1404-1427(0.42)                                                                               |
| gnl UG Hs#S7111491  | 2.52 | 1 1487-1512(2.52)                                                                               |
| gnl UG Hs#S1731770  | 1.01 | 1 72-98(1.01)                                                                                   |
| gnl UG Hs#S1729275  | 2.57 | 3 1410-1435(2.57) 1628-1653(1.57) 1654-1678(1.43)                                               |
| gnl UG Hs#S2293282  | 1.01 | 1 102-127(1.01)                                                                                 |
| gnl UG Hs#S10832307 | 3.98 | 3 59-84(3.98) 1687-1713(1.38) 3501-3526(1.40)                                                   |
| gnl UG Hs#S15636757 | 0.53 | 1 811-836(0.53)                                                                                 |
| gnl UG Hs#S1728245  | 1.46 | 2 369-394(1.46) 644-669(1.13)                                                                   |
| gnl UG Hs#S4620999  | 1.36 | 1 2497-2522(1.36)                                                                               |
| gnl UG Hs#S3619165  | 3.13 | 2 1425-1450(3.13) 1466-1491(0.47)                                                               |
| gnl UG Hs#S4823114  | 1.26 | 4 547-575(0.24) 2226-2251(1.26) 2856-2881(0.46) 3229-3256(1.24)                                 |
| gnl UG Hs#S4546257  | 1.34 | 1 565-591(1.34)                                                                                 |
| gnl UG Hs#S1728053  | 3.72 | 5 1570-1595(0.30) 1680-1705(0.63) 2168-2193(0.68) 2347-2372(3.72) 2592-2617(0.65)               |
| gnl UG Hs#S2293721  | 0.91 | 1 1144-1171(0.91)                                                                               |
| gnl UG Hs#S6693365  | 5.04 | 5 2-27(0.65) 915-943(1.62) 977-1002(5.04) 1120-1145(4.53) 1364-1393(1.71)                       |
| gnl UG Hs#S3438550  | 0.21 | 1 1063-1089(0.21)                                                                               |
| gnl UG Hs#S2140071  | 2.94 | 1 320-348(2.94)                                                                                 |
| gnl UG Hs#S1726941  | 2.82 | 2 387-415(0.85) 436-461(2.82)                                                                   |
| gnl UG Hs#S2294141  | 0.84 | 4 473-502(0.82) 526-552(0.58) 594-620(0.84) 1417-1442(0.50)                                     |
| gnl UG Hs#S2294086  | 1.11 | 1 282-306(1.11)                                                                                 |
| gnl UG Hs#S998717   | 0.13 | 2 298-324(0.02) 3379-3405(0.13)                                                                 |
| gnl UG Hs#S4815303  | 3.07 | 1 32-57(3.07)                                                                                   |
| gnl UG Hs#S2139957  | 4.28 | 5 244-269(0.45) 786-814(1.49) 853-878(4.28) 1316-1343(0.75) 2638-2666(3.84)                     |
| gnl UG Hs#S3219192  | 2.63 | 6 843-869(0.12) 1090-1117(0.39) 1338-1363(0.63) 1902-1927(1.40) 2054-2079(2.63) 2124-2152(0.20) |
| gnl UG Hs#S2294438  | 0.51 | 1 1423-1448(0.51)                                                                               |
| gnl UG Hs#S4827348  | 1.4  | 1 2630-2655(1.40)                                                                               |
| gnl UG Hs#S4284695  | 1.75 | 2 333-358(0.06) 367-392(1.75)                                                                   |
| gnl UG Hs#S2293816  | 1.04 | 1 240-265(1.04)                                                                                 |
| gnl UG Hs#S2294595  | 1.82 | 1 162-187(1.82)                                                                                 |
| gnl UG Hs#S5978573  | 1.99 | 3 16-44(0.71) 160-185(0.91) 313-337(1.99)                                                       |
| gnl UG Hs#S4814089  | 5.08 | 1 2069-2095(5.08)                                                                               |



|                     |      |                                                                                                                                                                          |
|---------------------|------|--------------------------------------------------------------------------------------------------------------------------------------------------------------------------|
| gnl UG Hs#S1730514  | 1.07 | 1 212-237(1.07)                                                                                                                                                          |
| gnl UG Hs#S1730854  | 2.04 | 2 344-369(2.04) 834-859(0.65)                                                                                                                                            |
| gnl UG Hs#S2293558  | 3.01 | 4 162-190(0.16) 843-868(1.39) 961-986(1.23) 987-1012(3.01)                                                                                                               |
| gnl UG Hs#S3619310  | 3.2  | 2 42-67(0.13) 526-552(3.20)                                                                                                                                              |
| gnl UG Hs#S4825170  | 5.46 | 8 628-653(5.46) 671-694(0.87) 961-986(3.89) 1001-1024(2.31) 1037-1063(3.04) 1261-1286(0.30) 1318-1343(2.78) 1361-1389(0.23)                                              |
| gnl UG Hs#S3438856  | 2.23 | 1 916-944(2.23)                                                                                                                                                          |
| gnl UG Hs#S3619170  | 5.37 | 2 470-494(0.04) 877-902(5.37)                                                                                                                                            |
| gnl UG Hs#S5517747  | 1.37 | 1 1331-1357(1.37)                                                                                                                                                        |
| gnl UG Hs#S1727582  | 0.5  | 1 445-470(0.50)                                                                                                                                                          |
| gnl UG Hs#S2140037  | 1.84 | 2 335-360(0.04) 427-454(1.84)                                                                                                                                            |
| gnl UG Hs#S1726325  | 4.08 | 5 391-419(0.72) 2322-2348(2.34) 2618-2644(0.76) 2646-2673(1.20) 3072-3097(4.08)                                                                                          |
| gnl UG Hs#S3219790  | 3.86 | 3 117-142(0.08) 860-886(3.86) 1035-1060(0.14)                                                                                                                            |
| gnl UG Hs#S1367575  | 2.57 | 9 83-109(0.10) 121-146(0.63) 586-611(0.52) 830-855(0.30) 888-912(0.75) 1537-1562(2.17) 2440-2465(1.21) 3253-3278(1.78) 3510-3535(2.57)                                   |
| gnl UG Hs#S6159130  | 2.17 | 3 210-234(0.29) 1133-1159(2.17) 1732-1758(0.86)                                                                                                                          |
| gnl UG Hs#S1727160  | 2.5  | 1 75-100(2.50)                                                                                                                                                           |
| gnl UG Hs#S4807719  | 5.36 | 11 215-240(5.36) 276-301(0.46) 785-810(4.46) 855-880(2.72) 963-989(0.17) 1166-1191(2.20) 1419-1445(3.92) 1556-1581(1.56) 1608-1633(0.65) 2289-2316(1.48) 2512-2538(0.54) |
| gnl UG Hs#S3220048  | 1.92 | 4 120-147(1.92) 186-211(0.43) 302-329(0.11) 352-377(0.55)                                                                                                                |
| gnl UG Hs#S6158562  | 1.69 | 2 650-678(0.98) 1446-1472(1.69)                                                                                                                                          |
| gnl UG Hs#S4807752  | 0.26 | 1 609-634(0.26)                                                                                                                                                          |
| gnl UG Hs#S15634727 | 8.01 | 6 43-67(4.26) 676-704(0.94) 2283-2311(0.42) 2328-2353(8.01) 2420-2445(0.66) 3134-3157(0.25)                                                                              |
| gnl UG Hs#S1973049  | 2.08 | 4 2323-2349(0.26) 2448-2474(2.08) 3002-3028(1.33) 3377-3405(1.18)                                                                                                        |
| gnl UG Hs#S6163462  | 3.75 | 1 70-98(3.75)                                                                                                                                                            |
| gnl UG Hs#S15641444 | 1.99 | 1 126-149(1.99)                                                                                                                                                          |
| gnl UG Hs#S2138879  | 0.14 | 1 840-865(0.14)                                                                                                                                                          |
| gnl UG Hs#S3219934  | 0.48 | 1 474-499(0.48)                                                                                                                                                          |
| gnl UG Hs#S2139408  | 1.34 | 2 497-523(1.34) 566-593(0.43)                                                                                                                                            |
| gnl UG Hs#S15635836 | 3.08 | 2 320-347(0.15) 369-394(3.08)                                                                                                                                            |
| gnl UG Hs#S5494993  | 1.21 | 1 250-278(1.21)                                                                                                                                                          |
| gnl UG Hs#S4631239  | 3.94 | 2 60-84(3.94) 196-221(1.72)                                                                                                                                              |
| gnl UG Hs#S4807591  | 3.04 | 3 975-1002(2.51) 1538-1563(0.91) 1766-1791(3.04)                                                                                                                         |
| gnl UG Hs#S4396022  | 0.19 | 1 196-223(0.19)                                                                                                                                                          |
| gnl UG Hs#S3219051  | 0.32 | 1 175-200(0.32)                                                                                                                                                          |
| gnl UG Hs#S1569388  | 1.82 | 2 1391-1416(1.11) 1449-1474(1.82)                                                                                                                                        |
| gnl UG Hs#S4812303  | 4.4  | 2 915-943(4.40) 962-988(0.95)                                                                                                                                            |
| gnl UG Hs#S4554612  | 0.11 | 1 1270-1296(0.11)                                                                                                                                                        |
| gnl UG Hs#S3990946  | 4.47 | 5 313-339(4.47) 1116-1142(3.73) 1159-1185(0.58) 1279-1305(0.30) 1318-1346(0.08)                                                                                          |
| gnl UG Hs#S1729184  | 4.47 | 2 366-390(0.67) 593-618(4.47)                                                                                                                                            |
| gnl UG Hs#S1727847  | 1.17 | 1 1169-1195(1.17)                                                                                                                                                        |
| gnl UG Hs#S11046686 | 0.01 | 1 1335-1361(0.01)                                                                                                                                                        |
| gnl UG Hs#S1732058  | 0.3  | 1 196-221(0.30)                                                                                                                                                          |
| gnl UG Hs#S1726440  | 4.85 | 4 477-505(1.25) 526-554(0.39) 749-775(0.72) 868-893(4.85)                                                                                                                |
| gnl UG Hs#S1726925  | 1.98 | 1 785-810(1.98)                                                                                                                                                          |
| gnl UG Hs#S3619402  | 2.4  | 4 222-248(2.40) 367-392(0.34) 429-452(0.55) 601-627(0.23)                                                                                                                |
| gnl UG Hs#S4821116  | 2.92 | 3 95-120(2.92) 334-359(1.56) 404-430(2.64)                                                                                                                               |
| gnl UG Hs#S2139437  | 0.92 | 1 200-225(0.92)                                                                                                                                                          |
| gnl UG Hs#S4623365  | 3.98 | 8 866-892(0.94) 1715-1740(1.13) 2052-2077(0.30) 2255-2280(0.11) 2542-2568(0.52) 3144-3169(0.46) 3415-3440(3.98) 3812-3837(0.33)                                          |
| gnl UG Hs#S1824277  | 3.39 | 2 19-47(1.52) 125-150(3.39)                                                                                                                                              |
| gnl UG Hs#S1731337  | 2.48 | 7 234-264(1.05) 570-594(2.48) 811-837(0.59) 855-880(0.33) 899-924(0.57) 1211-1238(0.32) 1557-1580(0.15)                                                                  |
| gnl UG Hs#S2140108  | 3.81 | 1 421-447(3.81)                                                                                                                                                          |
| gnl UG Hs#S5979234  | 3.89 | 2 337-362(0.87) 1902-1926(3.89)                                                                                                                                          |
| gnl UG Hs#S4617991  | 1.26 | 2 113-138(1.26) 687-713(0.17)                                                                                                                                            |
| gnl UG Hs#S4283622  | 2.07 | 3 263-288(0.58) 2271-2296(2.07) 2730-2755(0.84)                                                                                                                          |
| gnl UG Hs#S15642318 | 2.63 | 1 568-593(2.63)                                                                                                                                                          |
| gnl UG Hs#S3219198  | 2.4  | 9 1081-1107(0.58) 1223-1249(2.40) 1582-1605(1.74) 1906-1932(1.76) 2018-2044(1.27) 2297-2323(2.14) 2324-2350(0.60) 2535-2558(1.67) 2716-2743(0.98)                        |

|                     |      |                                                                                               |
|---------------------|------|-----------------------------------------------------------------------------------------------|
| gnl UG Hs#S6687001  | 0.5  | 1 1058-1084(0.50)                                                                             |
| gnl UG Hs#S1729614  | 2.21 | 2 547-573(0.84) 1097-1122(2.21)                                                               |
| gnl UG Hs#S1730123  | 0.16 | 2 54-82(0.16) 199-224(0.04)                                                                   |
| gnl UG Hs#S1727330  | 3.98 | 1 299-324(3.98)                                                                               |
| gnl UG Hs#S6163075  | 1.51 | 4 273-302(1.03) 779-807(0.59) 1015-1042(1.51) 1051-1076(0.02)                                 |
| gnl UG Hs#S4554576  | 1.57 | 4 165-190(1.57) 881-906(0.65) 1146-1172(0.23) 1200-1228(1.42)                                 |
| gnl UG Hs#S3219872  | 0.94 | 2 633-661(0.30) 682-708(0.94)                                                                 |
| gnl UG Hs#S15638175 | 0.94 | 1 1416-1444(0.94)                                                                             |
| gnl UG Hs#S7111488  | 1.01 | 2 2024-2049(0.07) 2098-2124(1.01)                                                             |
| gnl UG Hs#S3219079  | 0.11 | 1 677-702(0.11)                                                                               |
| gnl UG Hs#S4616468  | 4.82 | 6 175-200(0.53) 424-449(1.58) 470-495(0.33) 944-969(4.82) 1479-1502(1.29) 1824-1850(2.30)     |
| gnl UG Hs#S2139716  | 1.89 | 2 708-733(0.17) 872-897(1.89)                                                                 |
| gnl UG Hs#S1730099  | 4.79 | 6 418-443(2.20) 545-570(0.79) 1144-1168(0.68) 1421-1446(0.71) 1885-1910(3.63) 2171-2196(4.79) |
| gnl UG Hs#S2139578  | 1.33 | 1 2258-2283(1.33)                                                                             |
| gnl UG Hs#S1731694  | 1.49 | 1 185-213(1.49)                                                                               |
| gnl UG Hs#S1731346  | 0.66 | 1 1286-1314(0.66)                                                                             |
| gnl UG Hs#S2138922  | 0.49 | 1 1-29(0.49)                                                                                  |
| gnl UG Hs#S11046640 | 0.01 | 1 88-116(0.01)                                                                                |
| gnl UG Hs#S4044516  | 1.21 | 1 53-76(1.21)                                                                                 |
| gnl UG Hs#S3219913  | 1.95 | 4 176-202(0.33) 647-673(0.20) 740-765(1.95) 851-876(1.23)                                     |
| gnl UG Hs#S3220034  | 2.36 | 3 1230-1255(2.36) 1841-1866(1.46) 2633-2659(1.30)                                             |
| gnl UG Hs#S2140424  | 1.36 | 3 69-94(1.36) 238-264(1.20) 302-326(0.03)                                                     |
| gnl UG Hs#S3601748  | 0.94 | 2 76-102(0.94) 1331-1357(0.23)                                                                |
| gnl UG Hs#S3439015  | 4.2  | 2 596-621(4.20) 730-755(0.07)                                                                 |
| gnl UG Hs#S4810144  | 1.26 | 1 259-284(1.26)                                                                               |
| gnl UG Hs#S1727548  | 1.5  | 3 496-521(0.50) 572-597(1.50) 541-564(0.47)                                                   |
| gnl UG Hs#S4546268  | 1.08 | 2 87-112(0.33) 138-164(1.08)                                                                  |
| gnl UG Hs#S3881307  | 1.63 | 1 802-827(1.63)                                                                               |
| gnl UG Hs#S1730366  | 2.26 | 1 1741-1766(2.26)                                                                             |
| gnl UG Hs#S2140274  | 3.21 | 1 21-45(3.21)                                                                                 |
| gnl UG Hs#S2293568  | 4.15 | 5 283-308(1.82) 615-642(1.29) 678-703(0.13) 818-844(4.15) 1630-1658(2.00)                     |
| gnl UG Hs#S1727615  | 0.13 | 1 145-173(0.13)                                                                               |
| gnl UG Hs#S1730128  | 2.94 | 3 224-249(1.89) 570-598(1.27) 614-641(2.94)                                                   |
| gnl UG Hs#S7110248  | 0.34 | 1 616-640(0.34)                                                                               |
| gnl UG Hs#S3603860  | 0.97 | 1 118-143(0.97)                                                                               |
| gnl UG Hs#S1729304  | 1.61 | 1 1826-1851(1.61)                                                                             |
| gnl UG Hs#S4814568  | 1.62 | 1 86-114(1.62)                                                                                |
| gnl UG Hs#S4046549  | 1.81 | 3 337-362(0.46) 459-483(1.51) 1045-1070(1.81)                                                 |
| gnl UG Hs#S1732185  | 0.61 | 1 387-411(0.61)                                                                               |
| gnl UG Hs#S14273473 | 0.49 | 2 143-171(0.49) 379-407(0.30)                                                                 |
| gnl UG Hs#S4807720  | 3.2  | 3 285-310(0.07) 487-512(0.84) 618-646(3.20)                                                   |
| gnl UG Hs#S1726841  | 1.91 | 1 243-269(1.91)                                                                               |
| gnl UG Hs#S1726756  | 4.92 | 1 390-415(4.92)                                                                               |
| gnl UG Hs#S1732413  | 0.21 | 2 221-247(0.21) 862-888(0.02)                                                                 |
| gnl UG Hs#S2139566  | 2.01 | 3 410-433(0.62) 661-684(0.29) 968-993(2.01)                                                   |
| gnl UG Hs#S3220080  | 2.53 | 3 776-805(0.08) 1275-1298(0.46) 1523-1548(2.53)                                               |
| gnl UG Hs#S3355499  | 0.43 | 1 234-260(0.43)                                                                               |
| gnl UG Hs#S3619133  | 1.39 | 3 247-273(1.30) 965-990(0.07) 1085-1110(1.39)                                                 |
| gnl UG Hs#S3219994  | 1.72 | 1 536-561(1.72)                                                                               |
| gnl UG Hs#S1729030  | 3.2  | 1 901-927(3.20)                                                                               |
| gnl UG Hs#S1726894  | 2.13 | 2 308-335(2.13) 424-449(0.16)                                                                 |
| gnl UG Hs#S3219699  | 0.57 | 2 647-674(0.57) 1129-1155(0.04)                                                               |
| gnl UG Hs#S4807741  | 0.04 | 1 946-971(0.04)                                                                               |
| gnl UG Hs#S2293833  | 2.24 | 1 173-198(2.24)                                                                               |

|                     |      |                                                                                                                                 |
|---------------------|------|---------------------------------------------------------------------------------------------------------------------------------|
| gnl UG Hs#S3817946  | 2.01 | 1 258-284(2.01)                                                                                                                 |
| gnl UG Hs#S4807695  | 1.4  | 1 163-188(1.40)                                                                                                                 |
| gnl UG Hs#S1824385  | 1.58 | 2 3280-3305(1.53) 3439-3464(1.58)                                                                                               |
| gnl UG Hs#S14802306 | 2.37 | 2 337-362(2.37) 435-460(1.39)                                                                                                   |
| gnl UG Hs#S1728409  | 1.55 | 1 620-645(1.55)                                                                                                                 |
| gnl UG Hs#S2139002  | 0.05 | 1 179-204(0.05)                                                                                                                 |
| gnl UG Hs#S1728847  | 2.07 | 4 131-159(2.07) 338-365(0.20) 401-429(0.61) 1061-1087(1.50)                                                                     |
| gnl UG Hs#S2139243  | 1.46 | 1 189-212(1.46)                                                                                                                 |
| gnl UG Hs#S1732318  | 1.56 | 1 115-141(1.56)                                                                                                                 |
| gnl UG Hs#S4815217  | 2.37 | 2 46-73(1.26) 446-472(2.37)                                                                                                     |
| gnl UG Hs#S3219960  | 0.14 | 1 979-1004(0.14)                                                                                                                |
| gnl UG Hs#S3802945  | 0.4  | 2 243-268(0.07) 1244-1270(0.40)                                                                                                 |
| gnl UG Hs#S1727473  | 1.79 | 3 74-99(1.79) 172-197(0.98) 577-602(1.24)                                                                                       |
| gnl UG Hs#S2293458  | 2.04 | 1 510-535(2.04)                                                                                                                 |
| gnl UG Hs#S2138797  | 1    | 1 901-925(1.00)                                                                                                                 |
| gnl UG Hs#S1731939  | 1.58 | 3 227-253(1.43) 896-921(0.30) 1146-1171(1.58)                                                                                   |
| gnl UG Hs#S3619401  | 1.45 | 1 128-156(1.45)                                                                                                                 |
| gnl UG Hs#S3438548  | 3.72 | 8 598-624(3.72) 1321-1346(0.08) 1387-1412(1.39) 1427-1454(2.16) 2232-2257(1.96) 2605-2630(2.46) 3272-3300(1.42) 3480-3503(0.95) |
| gnl UG Hs#S1730961  | 4.62 | 1 75-101(4.62)                                                                                                                  |
| gnl UG Hs#S6163425  | 0.72 | 1 575-600(0.72)                                                                                                                 |
| gnl UG Hs#S4553576  | 3.36 | 3 323-348(3.36) 370-395(0.72) 866-892(0.59)                                                                                     |
| gnl UG Hs#S1728837  | 1.91 | 2 591-616(1.91) 722-747(1.21)                                                                                                   |
| gnl UG Hs#S3837460  | 0.82 | 1 1028-1053(0.82)                                                                                                               |
| gnl UG Hs#S1728170  | 3.4  | 3 263-291(3.40) 525-550(0.97) 575-603(0.35)                                                                                     |
| gnl UG Hs#S4831140  | 1.33 | 1 10-37(1.33)                                                                                                                   |
| gnl UG Hs#S1729340  | 2.26 | 1 289-314(2.26)                                                                                                                 |
| gnl UG Hs#S2293781  | 0.61 | 1 228-254(0.61)                                                                                                                 |
| gnl UG Hs#S3219334  | 5.96 | 6 111-136(0.16) 471-496(0.04) 758-784(0.11) 906-931(5.96) 1519-1544(0.50) 1603-1628(0.66)                                       |
| gnl UG Hs#S14863513 | 0.79 | 1 406-431(0.79)                                                                                                                 |
| gnl UG Hs#S1727032  | 2.4  | 1 67-95(2.40)                                                                                                                   |
| gnl UG Hs#S15631451 | 0.46 | 1 792-817(0.46)                                                                                                                 |
| gnl UG Hs#S11062708 | 1.72 | 2 511-536(1.72) 626-651(1.08)                                                                                                   |
| gnl UG Hs#S1727467  | 0.95 | 1 496-522(0.95)                                                                                                                 |
| gnl UG Hs#S1728226  | 2.89 | 2 222-247(0.40) 389-413(2.89)                                                                                                   |
| gnl UG Hs#S14273045 | 1.31 | 1 285-309(1.31)                                                                                                                 |
| gnl UG Hs#S1730732  | 0.2  | 5 570-595(0.20) 602-627(0.20) 634-659(0.20) 666-691(0.20) 1363-1388(0.04)                                                       |
| gnl UG Hs#S4436317  | 3.98 | 1 980-1005(3.98)                                                                                                                |
| gnl UG Hs#S15631449 | 1.81 | 1 1281-1309(1.81)                                                                                                               |
| gnl UG Hs#S3817904  | 3.72 | 3 258-283(2.04) 444-469(3.72) 948-973(2.46)                                                                                     |
| gnl UG Hs#S4809309  | 2.62 | 4 412-437(2.62) 512-536(0.62) 817-842(1.04) 1254-1280(0.91)                                                                     |
| gnl UG Hs#S4809559  | 1.58 | 1 104-129(1.58)                                                                                                                 |
| gnl UG Hs#S11046603 | 0.36 | 1 26-52(0.36)                                                                                                                   |
| gnl UG Hs#S1730371  | 2.13 | 1 49-74(2.13)                                                                                                                   |
| gnl UG Hs#S4631334  | 1.03 | 2 385-413(0.49) 446-474(1.03)                                                                                                   |
| gnl UG Hs#S4819921  | 3.4  | 6 230-255(1.40) 287-315(0.66) 882-908(0.34) 1529-1554(0.08) 1805-1833(3.40) 2249-2274(1.95)                                     |
| gnl UG Hs#S3219006  | 3.24 | 4 137-162(2.43) 208-235(3.24) 247-273(0.60) 305-330(0.17)                                                                       |
| gnl UG Hs#S14812481 | 2.08 | 2 45-73(2.08) 197-225(0.75)                                                                                                     |
| gnl UG Hs#S14273061 | 3.53 | 1 401-426(3.53)                                                                                                                 |
| gnl UG Hs#S4807837  | 2.3  | 1 433-458(2.30)                                                                                                                 |
| gnl UG Hs#S4621616  | 1.1  | 1 769-793(1.10)                                                                                                                 |
| gnl UG Hs#S1728211  | 3.52 | 2 442-466(3.52) 638-665(2.20)                                                                                                   |
| gnl UG Hs#S1732123  | 0.91 | 2 257-283(0.91) 877-905(0.40)                                                                                                   |
| gnl UG Hs#S11590893 | 3.52 | 1 765-790(3.52)                                                                                                                 |
| gnl UG Hs#S3219892  | 4.4  | 4 230-255(4.39) 256-281(4.40) 389-414(1.04) 682-707(1.48)                                                                       |

|                     |      |    |                                                                                                                                                                     |
|---------------------|------|----|---------------------------------------------------------------------------------------------------------------------------------------------------------------------|
| gnl UG Hs#S2139086  | 0.62 | 1  | 509-535(0.62)                                                                                                                                                       |
| gnl UG Hs#S3601775  | 1.62 | 2  | 1228-1255(1.01) 1427-1450(1.62)                                                                                                                                     |
| gnl UG Hs#S11062787 | 2.72 | 8  | 135-161(0.72) 223-248(0.50) 273-298(2.72) 765-793(2.59) 1194-1219(1.79) 1433-1458(1.07) 1699-1727(0.84) 1998-2024(1.50)                                             |
| gnl UG Hs#S3355475  | 0.01 | 1  | 136-161(0.01)                                                                                                                                                       |
| gnl UG Hs#S2140671  | 0.98 | 1  | 727-752(0.98)                                                                                                                                                       |
| gnl UG Hs#S4814817  | 0.5  | 3  | 621-649(0.08) 1100-1125(0.50) 2470-2498(0.01)                                                                                                                       |
| gnl UG Hs#S7112736  | 0.98 | 1  | 54-80(0.98)                                                                                                                                                         |
| gnl UG Hs#S4396119  | 1    | 3  | 995-1020(1.00) 2170-2196(0.04) 3074-3099(0.13)                                                                                                                      |
| gnl UG Hs#S2294421  | 2.46 | 1  | 446-473(2.46)                                                                                                                                                       |
| gnl UG Hs#S1824350  | 0.89 | 1  | 102-126(0.89)                                                                                                                                                       |
| gnl UG Hs#S1729874  | 2.89 | 4  | 91-116(2.89) 179-204(1.65) 400-423(1.63) 484-510(0.72)                                                                                                              |
| gnl UG Hs#S3619225  | 4.2  | 1  | 246-274(4.20)                                                                                                                                                       |
| gnl UG Hs#S2294489  | 0.51 | 3  | 133-158(0.17) 296-324(0.51) 941-966(0.40)                                                                                                                           |
| gnl UG Hs#S11046711 | 4.11 | 4  | 811-836(3.13) 1026-1052(1.39) 1301-1327(4.11) 1712-1740(2.07)                                                                                                       |
| gnl UG Hs#S1569967  | 1.5  | 1  | 1457-1482(1.50)                                                                                                                                                     |
| gnl UG Hs#S4546110  | 2.04 | 1  | 4-29(2.04)                                                                                                                                                          |
| gnl UG Hs#S15631718 | 1.18 | 4  | 51-77(0.08) 79-104(0.98) 339-362(0.65) 435-460(1.18)                                                                                                                |
| gnl UG Hs#S1726698  | 1.97 | 1  | 140-167(1.97)                                                                                                                                                       |
| gnl UG Hs#S5978525  | 1.57 | 2  | 850-875(0.04) 1657-1682(1.57)                                                                                                                                       |
| gnl UG Hs#S3333526  | 2.56 | 5  | 224-250(0.82) 306-331(2.56) 921-944(0.67) 1847-1874(0.59) 2121-2149(0.16)                                                                                           |
| gnl UG Hs#S15115720 | 0.4  | 1  | 782-808(0.40)                                                                                                                                                       |
| gnl UG Hs#S6158998  | 0.28 | 1  | 265-291(0.28)                                                                                                                                                       |
| gnl UG Hs#S2139277  | 0.65 | 1  | 57-82(0.65)                                                                                                                                                         |
| gnl UG Hs#S3219921  | 1.14 | 1  | 91-117(1.14)                                                                                                                                                        |
| gnl UG Hs#S2138994  | 0.5  | 1  | 803-829(0.50)                                                                                                                                                       |
| gnl UG Hs#S1729202  | 2.5  | 1  | 377-402(2.50)                                                                                                                                                       |
| gnl UG Hs#S4830975  | 2.17 | 3  | 181-207(2.17) 851-876(0.26) 1208-1236(1.30)                                                                                                                         |
| gnl UG Hs#S15642840 | 1.82 | 1  | 489-515(1.82)                                                                                                                                                       |
| gnl UG Hs#S1731433  | 1.82 | 1  | 988-1013(1.82)                                                                                                                                                      |
| gnl UG Hs#S3601667  | 4.3  | 6  | 240-263(1.47) 296-321(0.91) 760-785(4.30) 792-817(2.04) 832-857(0.48) 1087-1112(2.30)                                                                               |
| gnl UG Hs#S2139290  | 0.82 | 2  | 109-134(0.65) 702-728(0.82)                                                                                                                                         |
| gnl UG Hs#S1730031  | 0.23 | 1  | 945-971(0.23)                                                                                                                                                       |
| gnl UG Hs#S1729750  | 0.91 | 2  | 559-584(0.23) 1212-1240(0.91)                                                                                                                                       |
| gnl UG Hs#S4816351  | 1.5  | 3  | 785-810(1.50) 2183-2208(0.55) 2331-2358(0.41)                                                                                                                       |
| gnl UG Hs#S4554618  | 1.01 | 1  | 165-190(1.01)                                                                                                                                                       |
| gnl UG Hs#S2294282  | 3.82 | 5  | 480-503(0.53) 537-563(1.82) 1667-1692(0.21) 2164-2192(1.49) 2375-2401(3.82)                                                                                         |
| gnl UG Hs#S3219702  | 2.43 | 11 | 133-159(0.91) 388-413(0.13) 462-487(2.43) 510-538(0.88) 773-798(0.52) 929-957(0.38) 1107-1132(0.36) 1466-1494(1.91) 1538-1563(1.04) 1569-1597(1.84) 1834-1860(2.33) |
| gnl UG Hs#S14802392 | 2.11 | 1  | 1567-1592(2.11)                                                                                                                                                     |
| gnl UG Hs#S5860336  | 1.82 | 2  | 667-692(1.82) 739-765(0.85)                                                                                                                                         |
| gnl UG Hs#S1730711  | 2.62 | 1  | 176-201(2.62)                                                                                                                                                       |
| gnl UG Hs#S2655080  | 4.26 | 2  | 1662-1686(4.26) 2196-2222(0.04)                                                                                                                                     |
| gnl UG Hs#S1730046  | 1.79 | 3  | 20-48(1.59) 98-123(1.79) 215-240(0.04)                                                                                                                              |
| gnl UG Hs#S4046180  | 1.08 | 4  | 268-294(0.18) 746-771(1.08) 897-924(1.01) 1141-1166(0.74)                                                                                                           |
| gnl UG Hs#S1726576  | 0.11 | 1  | 250-275(0.11)                                                                                                                                                       |
| gnl UG Hs#S4822632  | 1.36 | 1  | 464-490(1.36)                                                                                                                                                       |
| gnl UG Hs#S3438725  | 1.91 | 4  | 123-151(0.15) 882-908(0.34) 946-973(1.91) 1265-1292(0.20)                                                                                                           |
| gnl UG Hs#S4829013  | 1.94 | 1  | 2155-2181(1.94)                                                                                                                                                     |
| gnl UG Hs#S5978596  | 2.82 | 1  | 708-734(2.82)                                                                                                                                                       |
| gnl UG Hs#S4829107  | 3.31 | 1  | 613-639(3.31)                                                                                                                                                       |
| gnl UG Hs#S1728230  | 1.64 | 2  | 461-487(0.23) 541-566(1.64)                                                                                                                                         |
| gnl UG Hs#S2649401  | 3.56 | 9  | 31-57(0.53) 393-418(1.36) 1062-1087(0.13) 1223-1248(3.46) 1850-1875(0.85) 2221-2246(3.56) 2695-2720(0.66) 2781-2807(0.10) 2821-2847(1.65)                           |
| gnl UG Hs#S15638198 | 0.15 | 1  | 844-871(0.15)                                                                                                                                                       |
| gnl UG Hs#S5930947  | 1.66 | 1  | 197-225(1.66)                                                                                                                                                       |
| gnl UG Hs#S1730353  | 2.76 | 2  | 448-474(2.76) 964-989(1.11)                                                                                                                                         |

|                     |      |    |                                                                                                                                                         |
|---------------------|------|----|---------------------------------------------------------------------------------------------------------------------------------------------------------|
| gnl UG Hs#S1730637  | 0.72 | 2  | 167-192(0.20) 1757-1784(0.72)                                                                                                                           |
| gnl UG Hs#S1731741  | 1.18 | 1  | 167-194(1.18)                                                                                                                                           |
| gnl UG Hs#S1729746  | 0.56 | 1  | 297-324(0.56)                                                                                                                                           |
| gnl UG Hs#S4002090  | 0.43 | 1  | 322-348(0.43)                                                                                                                                           |
| gnl UG Hs#S1728718  | 0.65 | 1  | 173-198(0.65)                                                                                                                                           |
| gnl UG Hs#S2293637  | 1.91 | 5  | 1922-1947(0.84) 1955-1983(0.76) 3780-3807(0.56) 3829-3855(1.91) 4077-4102(0.92)                                                                         |
| gnl UG Hs#S1731064  | 3.78 | 4  | 1482-1507(3.78) 2163-2191(3.30) 2478-2507(0.40) 3018-3045(0.07)                                                                                         |
| gnl UG Hs#S4821577  | 4.7  | 2  | 264-289(4.70) 496-523(1.24)                                                                                                                             |
| gnl UG Hs#S1732190  | 1.98 | 1  | 1301-1326(1.98)                                                                                                                                         |
| gnl UG Hs#S3601618  | 0.49 | 2  | 984-1009(0.13) 1031-1059(0.49)                                                                                                                          |
| gnl UG Hs#S3803668  | 1.53 | 10 | 65-91(0.07) 157-182(0.50) 963-988(0.53) 1836-1861(0.50) 2855-2880(0.82) 2925-2951(0.69) 3183-3208(1.53) 3846-3874(0.35) 3935-3961(1.50) 4232-4257(0.94) |
| gnl UG Hs#S3438337  | 0.23 | 2  | 626-654(0.23) 740-766(0.04)                                                                                                                             |
| gnl UG Hs#S15642409 | 1.39 | 3  | 7-34(1.39) 53-81(1.23) 121-149(0.47)                                                                                                                    |
| gnl UG Hs#S1728831  | 0.91 | 3  | 897-925(0.04) 1671-1694(0.27) 1974-2000(0.91)                                                                                                           |
| gnl UG Hs#S4807645  | 0.13 | 1  | 5-28(0.13)                                                                                                                                              |
| gnl UG Hs#S3219280  | 2.2  | 3  | 310-337(2.20) 393-419(0.57) 883-909(1.99)                                                                                                               |
| gnl UG Hs#S6158543  | 2.14 | 4  | 1566-1594(2.13) 1699-1725(0.10) 1731-1759(2.14) 2529-2554(0.98)                                                                                         |
| gnl UG Hs#S1729491  | 0.1  | 2  | 78-104(0.08) 711-737(0.10)                                                                                                                              |
| gnl UG Hs#S4619502  | 1.03 | 2  | 2164-2191(0.62) 2611-2636(1.03)                                                                                                                         |
| gnl UG Hs#S3438570  | 0.87 | 1  | 394-419(0.87)                                                                                                                                           |
| gnl UG Hs#S2293535  | 1.46 | 1  | 419-444(1.46)                                                                                                                                           |
| gnl UG Hs#S1726488  | 1.91 | 2  | 438-464(1.91) 825-853(0.07)                                                                                                                             |
| gnl UG Hs#S5978435  | 2.11 | 4  | 853-879(0.08) 1325-1351(2.11) 2632-2655(0.11) 2826-2851(0.36)                                                                                           |
| gnl UG Hs#S4621303  | 0.13 | 2  | 333-363(0.01) 523-551(0.13)                                                                                                                             |
| gnl UG Hs#S3438909  | 0.82 | 1  | 254-277(0.82)                                                                                                                                           |
| gnl UG Hs#S1728970  | 2.3  | 3  | 200-225(2.30) 323-351(1.79) 575-600(1.65)                                                                                                               |
| gnl UG Hs#S15730161 | 2.98 | 5  | 245-270(0.04) 509-534(2.11) 1019-1045(0.95) 1145-1170(0.72) 1814-1839(2.98)                                                                             |
| gnl UG Hs#S15636362 | 1.34 | 2  | 46-73(0.26) 1691-1718(1.34)                                                                                                                             |
| gnl UG Hs#S1730958  | 2.82 | 3  | 370-395(1.55) 550-575(2.82) 1085-1110(0.10)                                                                                                             |
| gnl UG Hs#S2293845  | 2.4  | 1  | 98-126(2.40)                                                                                                                                            |
| gnl UG Hs#S2293308  | 2.29 | 6  | 195-220(0.46) 514-539(1.36) 845-871(0.33) 886-911(1.68) 934-959(2.29) 983-1008(2.01)                                                                    |
| gnl UG Hs#S2139467  | 0.83 | 1  | 3464-3490(0.83)                                                                                                                                         |
| gnl UG Hs#S6664690  | 0.93 | 2  | 276-301(0.04) 313-338(0.93)                                                                                                                             |
| gnl UG Hs#S1731173  | 1.66 | 1  | 492-520(1.66)                                                                                                                                           |
| gnl UG Hs#S1729003  | 0.49 | 1  | 519-545(0.49)                                                                                                                                           |
| gnl UG Hs#S1731795  | 1.04 | 2  | 392-417(0.32) 1105-1130(1.04)                                                                                                                           |
| gnl UG Hs#S3619246  | 3.33 | 2  | 308-334(1.08) 2152-2177(3.33)                                                                                                                           |
| gnl UG Hs#S3438564  | 2.02 | 2  | 428-453(1.13) 1166-1193(2.02)                                                                                                                           |
| gnl UG Hs#S7113287  | 2.89 | 3  | 101-126(2.89) 128-154(1.17) 645-670(0.91)                                                                                                               |
| gnl UG Hs#S2139156  | 2    | 3  | 84-110(0.06) 152-177(0.13) 259-284(2.00)                                                                                                                |
| gnl UG Hs#S3603848  | 3.2  | 8  | 1342-1367(0.24) 1561-1586(1.53) 1721-1747(0.08) 1808-1836(1.62) 1932-1959(3.20) 2367-2395(0.01) 2940-2966(0.66) 3483-3508(0.98)                         |
| gnl UG Hs#S3219723  | 0.82 | 2  | 334-360(0.82) 649-675(0.08)                                                                                                                             |
| gnl UG Hs#S1731120  | 4.82 | 5  | 269-294(1.53) 512-538(2.77) 881-906(0.08) 1358-1386(1.49) 1437-1463(4.82)                                                                               |
| gnl UG Hs#S4841854  | 0.98 | 2  | 299-322(0.98) 622-650(0.15)                                                                                                                             |
| gnl UG Hs#S1729577  | 0.62 | 2  | 327-353(0.62) 473-501(0.62)                                                                                                                             |
| gnl UG Hs#S2139543  | 0.13 | 1  | 100-127(0.13)                                                                                                                                           |
| gnl UG Hs#S10832108 | 0.75 | 1  | 393-419(0.75)                                                                                                                                           |
| gnl UG Hs#S3438998  | 0.54 | 2  | 248-274(0.54) 360-385(0.48)                                                                                                                             |
| gnl UG Hs#S2140252  | 3.43 | 2  | 10-35(3.43) 406-431(0.81)                                                                                                                               |
| gnl UG Hs#S3219780  | 0.23 | 1  | 281-309(0.23)                                                                                                                                           |
| gnl UG Hs#S2294294  | 1.83 | 1  | 582-608(1.83)                                                                                                                                           |
| gnl UG Hs#S3438346  | 2.99 | 2  | 141-167(2.99) 662-685(0.03)                                                                                                                             |
| gnl UG Hs#S7111311  | 1.87 | 1  | 1971-1996(1.87)                                                                                                                                         |
| gnl UG Hs#S11046606 | 1.79 | 2  | 322-347(1.43) 603-628(1.79)                                                                                                                             |

|                     |      |   |                                                                                         |
|---------------------|------|---|-----------------------------------------------------------------------------------------|
| gnl UG Hs#S4809442  | 1.65 | 2 | 1825-1852(0.13) 2072-2098(1.65)                                                         |
| gnl UG Hs#S1729959  | 1.07 | 2 | 35-61(0.02) 279-307(1.07)                                                               |
| gnl UG Hs#S3940548  | 1.98 | 3 | 720-745(0.81) 1045-1070(1.98) 1171-1196(0.91)                                           |
| gnl UG Hs#S1730105  | 2.33 | 1 | 269-294(2.33)                                                                           |
| gnl UG Hs#S15634157 | 0.24 | 1 | 3-28(0.24)                                                                              |
| gnl UG Hs#S4818134  | 0.14 | 1 | 323-348(0.14)                                                                           |
| gnl UG Hs#S1729641  | 0.94 | 1 | 121-149(0.94)                                                                           |
| gnl UG Hs#S2293801  | 0.33 | 1 | 1153-1178(0.33)                                                                         |
| gnl UG Hs#S1732239  | 0.08 | 1 | 422-447(0.08)                                                                           |
| gnl UG Hs#S2139639  | 2.89 | 1 | 549-575(2.89)                                                                           |
| gnl UG Hs#S4817155  | 1.5  | 2 | 867-893(1.50) 895-920(1.17)                                                             |
| gnl UG Hs#S3219107  | 1.53 | 1 | 96-122(1.53)                                                                            |
| gnl UG Hs#S2138940  | 5.58 | 1 | 1384-1409(5.58)                                                                         |
| gnl UG Hs#S1729950  | 1.01 | 1 | 724-750(1.01)                                                                           |
| gnl UG Hs#S2650878  | 1.5  | 2 | 188-213(0.26) 380-405(1.50)                                                             |
| gnl UG Hs#S2139583  | 2.08 | 6 | 452-478(0.79) 630-655(1.84) 702-727(0.34) 905-930(1.91) 1132-1159(0.88) 2161-2187(2.08) |
| gnl UG Hs#S15636092 | 5.46 | 5 | 625-650(5.46) 958-983(3.89) 998-1021(2.31) 1034-1060(3.04) 1258-1283(0.30)              |
| gnl UG Hs#S7112368  | 2.89 | 1 | 290-315(2.89)                                                                           |
| gnl UG Hs#S6693153  | 0.4  | 1 | 141-168(0.40)                                                                           |
| gnl UG Hs#S2139283  | 4.08 | 4 | 375-398(0.48) 1256-1284(0.59) 1519-1543(1.10) 1597-1623(4.08)                           |
| gnl UG Hs#S2294546  | 3.13 | 5 | 406-432(0.45) 1155-1179(0.87) 1611-1636(3.13) 1700-1728(1.88) 1750-1775(0.79)           |
| gnl UG Hs#S3602317  | 0.75 | 2 | 24-50(0.75) 1203-1229(0.30)                                                             |
| gnl UG Hs#S1728305  | 0.94 | 2 | 181-206(0.94) 404-430(0.78)                                                             |
| gnl UG Hs#S3219980  | 2.46 | 1 | 1063-1089(2.46)                                                                         |
| gnl UG Hs#S4821599  | 1.23 | 5 | 934-960(1.23) 1326-1353(0.79) 2072-2100(0.13) 2939-2965(0.59) 2966-2994(0.45)           |
| gnl UG Hs#S4283752  | 0.23 | 1 | 221-247(0.23)                                                                           |
| gnl UG Hs#S1731393  | 0.11 | 1 | 244-270(0.11)                                                                           |
| gnl UG Hs#S4631232  | 2.46 | 2 | 53-78(2.46) 1076-1104(0.94)                                                             |
| gnl UG Hs#S4823834  | 2.5  | 2 | 26-52(2.50) 383-409(0.94)                                                               |
| gnl UG Hs#S3601585  | 1.2  | 2 | 737-763(1.15) 1436-1462(1.20)                                                           |
| gnl UG Hs#S1731987  | 0.94 | 2 | 770-795(0.07) 835-860(0.94)                                                             |
| gnl UG Hs#S1731327  | 0.04 | 1 | 226-254(0.04)                                                                           |
| gnl UG Hs#S4807677  | 1.6  | 4 | 537-562(0.59) 608-634(1.60) 921-946(1.46) 1160-1185(1.34)                               |
| gnl UG Hs#S4614004  | 1.53 | 1 | 407-432(1.53)                                                                           |
| gnl UG Hs#S4436219  | 2.36 | 2 | 1483-1508(0.04) 1568-1596(2.36)                                                         |
| gnl UG Hs#S4284742  | 3.3  | 1 | 570-595(3.30)                                                                           |
| gnl UG Hs#S1727180  | 3.82 | 1 | 135-161(3.82)                                                                           |
| gnl UG Hs#S2294327  | 0.33 | 1 | 499-524(0.33)                                                                           |
| gnl UG Hs#S2139699  | 0.91 | 3 | 372-395(0.77) 401-426(0.43) 991-1016(0.91)                                              |
| gnl UG Hs#S4817377  | 0.36 | 1 | 22-48(0.36)                                                                             |
| gnl UG Hs#S2293165  | 0.66 | 1 | 1147-1173(0.66)                                                                         |
| gnl UG Hs#S10832001 | 2.23 | 1 | 618-646(2.23)                                                                           |
| gnl UG Hs#S1726311  | 3.79 | 4 | 576-602(3.79) 1790-1816(0.17) 2137-2165(1.13) 2359-2387(0.35)                           |
| gnl UG Hs#S4554621  | 0.43 | 1 | 627-653(0.43)                                                                           |
| gnl UG Hs#S5978539  | 2.98 | 4 | 913-938(1.94) 1087-1113(1.17) 1164-1190(0.11) 1354-1382(2.98)                           |
| gnl UG Hs#S4807730  | 2.68 | 1 | 10-36(2.68)                                                                             |
| gnl UG Hs#S1729353  | 1.17 | 1 | 542-567(1.17)                                                                           |
| gnl UG Hs#S2139187  | 4.14 | 2 | 28-55(3.37) 55-80(4.14)                                                                 |
| gnl UG Hs#S2139402  | 1.36 | 4 | 1353-1378(0.16) 2130-2156(1.36) 3023-3048(1.34) 3212-3237(0.04)                         |
| gnl UG Hs#S15115685 | 2.08 | 1 | 702-728(2.08)                                                                           |
| gnl UG Hs#S2293457  | 0.62 | 2 | 343-369(0.30) 428-451(0.62)                                                             |
| gnl UG Hs#S4283783  | 0.1  | 1 | 370-396(0.10)                                                                           |
| gnl UG Hs#S1728987  | 3.01 | 3 | 642-667(0.20) 2503-2528(3.01) 2609-2635(0.58)                                           |
| gnl UG Hs#S3219791  | 2.3  | 5 | 209-234(0.72) 291-317(1.01) 654-682(2.30) 790-815(0.98) 1080-1106(0.28)                 |

|                     |      |    |                                                                                                                                                                 |
|---------------------|------|----|-----------------------------------------------------------------------------------------------------------------------------------------------------------------|
| gnl UG Hs#S1728494  | 0.82 | 1  | 389-412(0.82)                                                                                                                                                   |
| gnl UG Hs#S5978462  | 0.5  | 1  | 136-161(0.50)                                                                                                                                                   |
| gnl UG Hs#S3438431  | 0.48 | 1  | 7-32(0.48)                                                                                                                                                      |
| gnl UG Hs#S1731600  | 3.17 | 2  | 81-106(3.17) 196-221(0.30)                                                                                                                                      |
| gnl UG Hs#S4284645  | 0.72 | 1  | 172-196(0.72)                                                                                                                                                   |
| gnl UG Hs#S1729484  | 4.31 | 3  | 105-128(4.31) 6253-6279(2.17) 8322-8348(0.31)                                                                                                                   |
| gnl UG Hs#S1969085  | 3.98 | 2  | 59-84(3.98) 3509-3534(1.40)                                                                                                                                     |
| gnl UG Hs#S2140603  | 0.48 | 2  | 663-688(0.14) 818-846(0.48)                                                                                                                                     |
| gnl UG Hs#S1730992  | 3.39 | 2  | 123-149(1.84) 172-197(3.39)                                                                                                                                     |
| gnl UG Hs#S4825840  | 0.72 | 1  | 174-199(0.72)                                                                                                                                                   |
| gnl UG Hs#S1732225  | 0.69 | 3  | 18-45(0.69) 208-232(0.30) 244-269(0.04)                                                                                                                         |
| gnl UG Hs#S3543447  | 3.92 | 9  | 266-293(0.70) 368-393(1.30) 415-441(2.30) 447-472(1.07) 544-569(0.20) 685-713(1.17) 1313-1339(1.82) 1477-1503(3.92) 2095-2121(1.11)                             |
| gnl UG Hs#S2139033  | 1.23 | 2  | 332-356(0.07) 400-426(1.23)                                                                                                                                     |
| gnl UG Hs#S1727592  | 2.04 | 1  | 514-539(2.04)                                                                                                                                                   |
| gnl UG Hs#S2294507  | 0.46 | 1  | 161-187(0.46)                                                                                                                                                   |
| gnl UG Hs#S10832570 | 1.86 | 2  | 1464-1490(1.86) 1913-1939(0.66)                                                                                                                                 |
| gnl UG Hs#S1726960  | 1.79 | 5  | 133-158(1.79) 226-254(1.08) 337-363(0.37) 440-464(0.68) 790-814(0.25)                                                                                           |
| gnl UG Hs#S1732009  | 4.14 | 5  | 1493-1518(4.14) 1573-1598(0.98) 1847-1872(0.66) 3196-3222(1.69) 3731-3754(0.28)                                                                                 |
| gnl UG Hs#S15640507 | 3.08 | 3  | 721-746(0.74) 1587-1612(1.78) 1744-1769(3.08)                                                                                                                   |
| gnl UG Hs#S1731150  | 0.36 | 2  | 342-367(0.36) 758-783(0.36)                                                                                                                                     |
| gnl UG Hs#S1824340  | 0.94 | 1  | 1816-1842(0.94)                                                                                                                                                 |
| gnl UG Hs#S1727589  | 0.98 | 1  | 146-171(0.98)                                                                                                                                                   |
| gnl UG Hs#S7112023  | 0.66 | 1  | 280-305(0.66)                                                                                                                                                   |
| gnl UG Hs#S3438738  | 1.27 | 3  | 513-539(1.27) 1314-1340(0.45) 1438-1463(1.02)                                                                                                                   |
| gnl UG Hs#S1729930  | 0.4  | 2  | 347-375(0.25) 967-993(0.40)                                                                                                                                     |
| gnl UG Hs#S1731396  | 1.37 | 1  | 323-348(1.37)                                                                                                                                                   |
| gnl UG Hs#S4392264  | 1.41 | 5  | 2397-2422(0.98) 2684-2710(0.34) 3139-3164(0.81) 3795-3822(1.41) 3968-3993(0.44)                                                                                 |
| gnl UG Hs#S1731642  | 1.69 | 3  | 214-238(0.46) 736-761(1.69) 912-937(0.89)                                                                                                                       |
| gnl UG Hs#S1731317  | 2.62 | 1  | 399-427(2.62)                                                                                                                                                   |
| gnl UG Hs#S1730203  | 2.5  | 1  | 154-179(2.50)                                                                                                                                                   |
| gnl UG Hs#S3438717  | 2.89 | 5  | 1414-1439(2.89) 1471-1495(0.98) 2478-2504(0.33) 2526-2554(0.49) 3041-3067(0.50)                                                                                 |
| gnl UG Hs#S11046652 | 1.14 | 1  | 252-277(1.14)                                                                                                                                                   |
| gnl UG Hs#S5978532  | 0.85 | 2  | 206-232(0.69) 347-372(0.85)                                                                                                                                     |
| gnl UG Hs#S2293509  | 0.97 | 1  | 136-161(0.97)                                                                                                                                                   |
| gnl UG Hs#S3619319  | 0.34 | 2  | 718-743(0.34) 1755-1781(0.20)                                                                                                                                   |
| gnl UG Hs#S5978455  | 0.9  | 1  | 957-983(0.90)                                                                                                                                                   |
| gnl UG Hs#S1728793  | 1.79 | 4  | 442-468(0.40) 558-586(1.79) 897-922(0.07) 1163-1189(1.24)                                                                                                       |
| gnl UG Hs#S3438724  | 0.72 | 1  | 540-565(0.72)                                                                                                                                                   |
| gnl UG Hs#S4811163  | 1.5  | 3  | 730-757(1.40) 1153-1181(1.40) 1208-1234(1.50)                                                                                                                   |
| gnl UG Hs#S1732251  | 3.88 | 5  | 109-134(1.30) 545-570(0.13) 858-883(2.56) 885-913(3.88) 919-944(0.08)                                                                                           |
| gnl UG Hs#S2138697  | 1.68 | 2  | 58-84(1.01) 204-229(1.68)                                                                                                                                       |
| gnl UG Hs#S5978444  | 0.91 | 1  | 1935-1960(0.91)                                                                                                                                                 |
| gnl UG Hs#S4808094  | 1.46 | 1  | 205-230(1.46)                                                                                                                                                   |
| gnl UG Hs#S15846918 | 3.23 | 2  | 1362-1387(3.23) 1703-1729(0.98)                                                                                                                                 |
| gnl UG Hs#S1731825  | 1.97 | 1  | 1417-1442(1.97)                                                                                                                                                 |
| gnl UG Hs#S1726594  | 2.33 | 10 | 1150-1175(0.53) 1183-1211(2.33) 1735-1760(1.94) 1975-2001(1.34) 2013-2039(1.34) 2454-2479(1.81) 2808-2833(0.05) 2886-2911(1.04) 3047-3072(1.72) 3093-3120(0.07) |
| gnl UG Hs#S2139233  | 2.72 | 2  | 80-105(2.72) 123-148(0.20)                                                                                                                                      |
| gnl UG Hs#S5978853  | 1.65 | 1  | 809-834(1.65)                                                                                                                                                   |
| gnl UG Hs#S7110495  | 3.4  | 6  | 1164-1190(1.08) 1230-1255(0.46) 1418-1445(2.40) 1662-1687(3.40) 1753-1781(0.49) 2544-2567(2.95)                                                                 |
| gnl UG Hs#S1727397  | 0.33 | 1  | 374-399(0.33)                                                                                                                                                   |
| gnl UG Hs#S2140400  | 5.57 | 1  | 243-269(5.57)                                                                                                                                                   |
| gnl UG Hs#S1731452  | 2.2  | 3  | 981-1009(2.20) 1812-1837(0.26) 2526-2551(0.01)                                                                                                                  |
| gnl UG Hs#S3619632  | 0.85 | 1  | 43-68(0.85)                                                                                                                                                     |
| gnl UG Hs#S5516785  | 1.24 | 3  | 144-172(0.62) 408-434(1.24) 1158-1183(0.50)                                                                                                                     |

|                     |      |                                                                                               |
|---------------------|------|-----------------------------------------------------------------------------------------------|
| gnl UG Hs#S1729364  | 3.99 | 1 314-340(3.99)                                                                               |
| gnl UG Hs#S1730059  | 1.1  | 3 621-646(0.83) 1447-1473(1.10) 1957-1984(0.62)                                               |
| gnl UG Hs#S1969096  | 1.61 | 3 386-411(1.61) 962-987(1.61) 2895-2920(0.20)                                                 |
| gnl UG Hs#S15632338 | 0.59 | 1 398-424(0.59)                                                                               |
| gnl UG Hs#S4812969  | 0.92 | 2 2357-2385(0.92) 2407-2432(0.50)                                                             |
| gnl UG Hs#S1729486  | 3.79 | 1 1516-1542(3.79)                                                                             |
| gnl UG Hs#S4815292  | 1.76 | 2 129-154(1.76) 764-789(0.90)                                                                 |
| gnl UG Hs#S1969154  | 3.42 | 1 1438-1464(3.42)                                                                             |
| gnl UG Hs#S4623553  | 0.4  | 1 4-29(0.40)                                                                                  |
| gnl UG Hs#S4545749  | 1.94 | 5 596-622(1.79) 1258-1283(1.60) 1565-1591(1.26) 1702-1727(1.94) 2736-2761(0.01)               |
| gnl UG Hs#S1729451  | 0.82 | 1 123-148(0.82)                                                                               |
| gnl UG Hs#S2293722  | 4.21 | 3 149-174(4.21) 258-286(1.62) 611-638(1.97)                                                   |
| gnl UG Hs#S3438119  | 3.04 | 3 18-43(0.23) 622-647(3.04) 820-846(1.27)                                                     |
| gnl UG Hs#S2139299  | 1.3  | 1 223-248(1.30)                                                                               |
| gnl UG Hs#S1731419  | 3.39 | 2 87-111(0.84) 310-335(3.39)                                                                  |
| gnl UG Hs#S5860357  | 2.21 | 2 1578-1603(2.21) 1685-1710(0.81)                                                             |
| gnl UG Hs#S1726620  | 2.98 | 5 259-287(2.98) 457-482(0.76) 587-613(0.17) 1587-1613(0.76) 1840-1866(1.62)                   |
| gnl UG Hs#S15631509 | 2.15 | 3 135-158(0.17) 501-526(2.15) 643-668(0.98)                                                   |
| gnl UG Hs#S2139983  | 2.98 | 6 500-526(0.67) 940-968(2.98) 1165-1190(1.91) 1383-1409(1.27) 1763-1789(2.89) 2101-2128(0.46) |
| gnl UG Hs#S5931262  | 1.53 | 2 755-780(1.53) 876-901(0.65)                                                                 |
| gnl UG Hs#S1731207  | 0.55 | 1 361-386(0.55)                                                                               |
| gnl UG Hs#S3438847  | 2.23 | 1 235-261(2.23)                                                                               |
| gnl UG Hs#S2651102  | 2.73 | 1 825-849(2.73)                                                                               |
| gnl UG Hs#S998739   | 0.08 | 1 1682-1710(0.08)                                                                             |
| gnl UG Hs#S4810163  | 3.37 | 1 195-221(3.37)                                                                               |
| gnl UG Hs#S2293577  | 0.23 | 2 503-529(0.21) 774-802(0.23)                                                                 |
| gnl UG Hs#S1727219  | 3.92 | 1 1733-1758(3.92)                                                                             |
| gnl UG Hs#S2293354  | 2.01 | 1 1430-1457(2.01)                                                                             |
| gnl UG Hs#S15635841 | 1.26 | 3 1502-1527(0.65) 2450-2475(0.98) 2518-2543(1.26)                                             |
| gnl UG Hs#S4807929  | 1.49 | 1 231-256(1.49)                                                                               |
| gnl UG Hs#S1732326  | 3.72 | 3 368-394(0.83) 664-689(0.30) 734-759(3.72)                                                   |
| gnl UG Hs#S2138791  | 0.01 | 1 307-332(0.01)                                                                               |
| gnl UG Hs#S1729515  | 0.53 | 1 173-198(0.53)                                                                               |
| gnl UG Hs#S1731330  | 1.44 | 1 396-422(1.44)                                                                               |
| gnl UG Hs#S4001833  | 0.84 | 1 867-892(0.84)                                                                               |
| gnl UG Hs#S1731350  | 3.2  | 5 246-271(2.20) 280-305(2.58) 468-494(2.18) 930-956(0.81) 1380-1405(3.20)                     |
| gnl UG Hs#S1732219  | 1.59 | 1 1403-1428(1.59)                                                                             |
| gnl UG Hs#S3219674  | 1.53 | 1 840-868(1.53)                                                                               |
| gnl UG Hs#S1727838  | 1.97 | 1 2120-2145(1.97)                                                                             |
| gnl UG Hs#S1726654  | 1.3  | 1 3126-3151(1.30)                                                                             |
| gnl UG Hs#S4817310  | 3.57 | 1 11-36(3.57)                                                                                 |
| gnl UG Hs#S14802366 | 1.21 | 2 271-296(0.72) 801-826(1.21)                                                                 |
| gnl UG Hs#S2293201  | 1.57 | 4 409-433(0.20) 665-691(0.42) 779-804(1.57) 1218-1243(0.62)                                   |
| gnl UG Hs#S15641288 | 1.94 | 2 995-1021(0.50) 1029-1055(1.94)                                                              |
| gnl UG Hs#S1728067  | 3.34 | 1 22-48(3.34)                                                                                 |
| gnl UG Hs#S2139288  | 0.21 | 1 511-536(0.21)                                                                               |
| gnl UG Hs#S1731609  | 1.07 | 4 73-101(1.07) 254-279(0.20) 372-403(0.29) 494-519(0.30)                                      |
| gnl UG Hs#S7110935  | 3.04 | 1 236-261(3.04)                                                                               |
| gnl UG Hs#S3603138  | 2.56 | 1 148-173(2.56)                                                                               |
| gnl UG Hs#S4819115  | 2.37 | 4 1279-1307(0.26) 1879-1904(1.88) 1960-1983(2.26) 2688-2716(2.37)                             |
| gnl UG Hs#S1730682  | 1.51 | 1 376-401(1.51)                                                                               |
| gnl UG Hs#S2139611  | 2.91 | 6 217-241(0.04) 293-318(1.55) 911-935(0.26) 1431-1456(0.56) 1801-1826(2.91) 1983-2006(0.06)   |
| gnl UG Hs#S1729646  | 3.19 | 1 296-323(3.19)                                                                               |
| gnl UG Hs#S4046361  | 2.04 | 2 467-492(2.04) 1390-1417(0.40)                                                               |



|                     |      |   |                                                                                                                                           |
|---------------------|------|---|-------------------------------------------------------------------------------------------------------------------------------------------|
| gnl UG Hs#S15636190 | 5.46 | 8 | 903-928(5.46) 945-968(0.87) 1235-1260(3.89) 1275-1298(2.31) 1311-1337(2.04) 1535-1560(0.30) 1592-1617(2.78) 1670-1698(0.20)               |
| gnl UG Hs#S4807573  | 2.57 | 2 | 260-286(0.76) 304-329(2.57)                                                                                                               |
| gnl UG Hs#S4813384  | 2.72 | 3 | 940-965(2.72) 1183-1209(0.08) 1241-1266(0.40)                                                                                             |
| gnl UG Hs#S15634875 | 3.62 | 9 | 531-556(0.04) 708-733(2.72) 878-903(3.62) 1175-1200(0.27) 1209-1237(0.62) 1532-1558(0.91) 1609-1634(0.71) 2286-2311(1.09) 2348-2374(1.30) |
| gnl UG Hs#S1728938  | 0.07 | 1 | 186-211(0.07)                                                                                                                             |
| gnl UG Hs#S3988049  | 2.11 | 7 | 458-483(0.26) 806-832(0.17) 2290-2318(2.03) 2491-2516(2.11) 3021-3048(0.90) 3093-3118(0.14) 3280-3306(0.37)                               |
| gnl UG Hs#S4841523  | 3.53 | 2 | 349-374(3.53) 754-779(0.30)                                                                                                               |
| gnl UG Hs#S1728143  | 3.37 | 2 | 1186-1212(0.50) 1240-1265(3.37)                                                                                                           |
| gnl UG Hs#S2139198  | 2.56 | 4 | 258-284(2.56) 639-665(1.40) 822-850(0.07) 1053-1078(0.72)                                                                                 |
| gnl UG Hs#S1731650  | 0.94 | 1 | 85-111(0.94)                                                                                                                              |
| gnl UG Hs#S1824514  | 3.3  | 2 | 66-92(3.30) 158-183(1.65)                                                                                                                 |
| gnl UG Hs#S4808390  | 1.55 | 2 | 156-181(1.55) 478-502(0.81)                                                                                                               |
| gnl UG Hs#S1731516  | 3.04 | 2 | 221-247(1.23) 677-703(3.04)                                                                                                               |
| gnl UG Hs#S3438185  | 2.04 | 1 | 627-652(2.04)                                                                                                                             |
| gnl UG Hs#S4554547  | 1.27 | 2 | 189-214(0.72) 585-613(1.27)                                                                                                               |
| gnl UG Hs#S4807556  | 0.88 | 1 | 1313-1339(0.88)                                                                                                                           |
| gnl UG Hs#S3603819  | 3.04 | 6 | 191-217(0.04) 675-700(3.04) 923-951(0.13) 1285-1311(1.17) 1736-1761(0.90) 2737-2762(0.91)                                                 |
| gnl UG Hs#S7110581  | 2.76 | 2 | 413-438(1.17) 737-762(2.76)                                                                                                               |
| gnl UG Hs#S1732210  | 1.23 | 1 | 1174-1200(1.23)                                                                                                                           |
| gnl UG Hs#S3601702  | 2.4  | 1 | 845-871(2.40)                                                                                                                             |
| gnl UG Hs#S5978615  | 2    | 2 | 1754-1778(2.00) 1871-1896(0.47)                                                                                                           |
| gnl UG Hs#S4435349  | 0.15 | 1 | 1106-1129(0.15)                                                                                                                           |
| gnl UG Hs#S1727576  | 3.08 | 2 | 269-294(3.08) 424-449(0.14)                                                                                                               |
| gnl UG Hs#S3817918  | 1.52 | 3 | 422-446(0.31) 481-508(0.84) 1623-1648(1.52)                                                                                               |
| gnl UG Hs#S4619720  | 0.98 | 1 | 554-579(0.98)                                                                                                                             |
| gnl UG Hs#S4824042  | 0.36 | 1 | 596-622(0.36)                                                                                                                             |
| gnl UG Hs#S1731143  | 2.13 | 1 | 662-686(2.13)                                                                                                                             |
| gnl UG Hs#S5978601  | 0.08 | 1 | 763-789(0.08)                                                                                                                             |
| gnl UG Hs#S1731149  | 0.56 | 1 | 256-284(0.56)                                                                                                                             |
| gnl UG Hs#S3619269  | 3.99 | 1 | 603-630(3.99)                                                                                                                             |
| gnl UG Hs#S1728037  | 2.39 | 4 | 290-315(1.07) 1147-1172(2.11) 1584-1607(2.39) 3495-3522(1.20)                                                                             |
| gnl UG Hs#S1728992  | 1.08 | 1 | 141-166(1.08)                                                                                                                             |
| gnl UG Hs#S6693343  | 0.77 | 1 | 542-566(0.77)                                                                                                                             |
| gnl UG Hs#S4807968  | 1.07 | 5 | 56-81(0.04) 648-672(1.07) 810-838(0.98) 897-925(0.14) 1487-1512(0.59)                                                                     |
| gnl UG Hs#S4631281  | 1.16 | 4 | 698-723(1.16) 807-832(0.21) 990-1015(0.58) 1371-1399(0.04)                                                                                |
| gnl UG Hs#S4824558  | 1.25 | 1 | 243-271(1.25)                                                                                                                             |
| gnl UG Hs#S2140661  | 0.01 | 1 | 229-257(0.01)                                                                                                                             |
| gnl UG Hs#S15637307 | 1.49 | 5 | 235-261(0.94) 373-401(0.23) 716-741(1.49) 871-896(0.89) 903-930(0.63)                                                                     |
| gnl UG Hs#S3814592  | 0.58 | 1 | 169-194(0.58)                                                                                                                             |
| gnl UG Hs#S4819893  | 0.4  | 1 | 14-42(0.40)                                                                                                                               |
| gnl UG Hs#S3542649  | 0.4  | 1 | 453-478(0.40)                                                                                                                             |
| gnl UG Hs#S3438985  | 2.55 | 2 | 316-341(0.20) 808-832(2.55)                                                                                                               |
| gnl UG Hs#S10831967 | 0.04 | 1 | 708-733(0.04)                                                                                                                             |
| gnl UG Hs#S4807728  | 1.94 | 4 | 143-171(0.07) 336-364(1.94) 547-575(0.07) 576-602(0.04)                                                                                   |
| gnl UG Hs#S1726515  | 2.47 | 6 | 184-207(2.47) 282-308(1.27) 605-630(0.26) 791-816(1.08) 1397-1422(2.32) 1436-1461(1.84)                                                   |
| gnl UG Hs#S4392131  | 1.08 | 2 | 149-174(0.17) 1888-1913(1.08)                                                                                                             |
| gnl UG Hs#S1726732  | 2.81 | 3 | 580-605(0.01) 824-852(2.81) 1586-1610(0.87)                                                                                               |
| gnl UG Hs#S1730464  | 0.69 | 2 | 1995-2021(0.69) 2161-2186(0.13)                                                                                                           |
| gnl UG Hs#S4822383  | 0.79 | 2 | 255-280(0.79) 1463-1488(0.36)                                                                                                             |
| gnl UG Hs#S4046408  | 2.46 | 3 | 1651-1676(2.46) 1716-1739(0.49) 1772-1798(1.43)                                                                                           |
| gnl UG Hs#S3438675  | 4.89 | 1 | 158-184(4.89)                                                                                                                             |
| gnl UG Hs#S3438442  | 1.98 | 3 | 408-436(0.52) 566-591(0.62) 1001-1026(1.98)                                                                                               |
| gnl UG Hs#S1726869  | 0.86 | 1 | 145-171(0.86)                                                                                                                             |
| gnl UG Hs#S1731748  | 2    | 2 | 560-585(2.00) 2056-2081(0.75)                                                                                                             |

|                     |      |    |                                                                                                                                                                                             |
|---------------------|------|----|---------------------------------------------------------------------------------------------------------------------------------------------------------------------------------------------|
| gnl UG Hs#S14802406 | 1.07 | 1  | 365-390(1.07)                                                                                                                                                                               |
| gnl UG Hs#S2139571  | 0.4  | 1  | 941-966(0.40)                                                                                                                                                                               |
| gnl UG Hs#S3619625  | 0.3  | 1  | 601-624(0.30)                                                                                                                                                                               |
| gnl UG Hs#S1263861  | 2.16 | 1  | 409-436(2.16)                                                                                                                                                                               |
| gnl UG Hs#S7111570  | 6.84 | 1  | 363-391(6.84)                                                                                                                                                                               |
| gnl UG Hs#S3218919  | 2.34 | 3  | 1032-1058(0.66) 1084-1110(1.82) 1297-1322(2.34)                                                                                                                                             |
| gnl UG Hs#S1729396  | 2.89 | 2  | 53-78(0.08) 153-178(2.89)                                                                                                                                                                   |
| gnl UG Hs#S1727409  | 0.33 | 1  | 87-112(0.33)                                                                                                                                                                                |
| gnl UG Hs#S3438917  | 0.84 | 2  | 1412-1438(0.01) 1774-1799(0.84)                                                                                                                                                             |
| gnl UG Hs#S1726248  | 0.98 | 1  | 805-830(0.98)                                                                                                                                                                               |
| gnl UG Hs#S3603168  | 0.17 | 1  | 681-707(0.17)                                                                                                                                                                               |
| gnl UG Hs#S4826791  | 1.91 | 1  | 1375-1403(1.91)                                                                                                                                                                             |
| gnl UG Hs#S7112247  | 1.04 | 1  | 1134-1160(1.04)                                                                                                                                                                             |
| gnl UG Hs#S3993529  | 2.14 | 1  | 425-451(2.14)                                                                                                                                                                               |
| gnl UG Hs#S3438404  | 0.11 | 1  | 1536-1561(0.11)                                                                                                                                                                             |
| gnl UG Hs#S1728784  | 1.85 | 2  | 87-112(0.20) 142-166(1.85)                                                                                                                                                                  |
| gnl UG Hs#S2140260  | 1.14 | 5  | 236-261(0.00) 589-612(0.36) 682-708(1.11) 1455-1480(0.46) 2506-2531(1.14)                                                                                                                   |
| gnl UG Hs#S3603009  | 3.62 | 2  | 1137-1165(0.79) 2250-2275(3.62)                                                                                                                                                             |
| gnl UG Hs#S2293544  | 0.76 | 1  | 264-290(0.76)                                                                                                                                                                               |
| gnl UG Hs#S2139669  | 2.97 | 5  | 121-146(0.62) 161-186(2.15) 327-352(2.97) 576-602(0.90) 651-677(0.04)                                                                                                                       |
| gnl UG Hs#S4396002  | 1.26 | 4  | 1313-1338(0.14) 1445-1470(0.36) 1712-1737(0.30) 3104-3129(1.26)                                                                                                                             |
| gnl UG Hs#S4824051  | 4.34 | 6  | 726-752(0.98) 835-864(1.71) 1123-1149(4.34) 1379-1404(0.91) 1528-1553(0.17) 1686-1711(1.23)                                                                                                 |
| gnl UG Hs#S4811625  | 3.33 | 2  | 1069-1095(3.33) 1558-1584(0.03)                                                                                                                                                             |
| gnl UG Hs#S1726353  | 1.77 | 1  | 116-141(1.77)                                                                                                                                                                               |
| gnl UG Hs#S2293755  | 2.97 | 2  | 410-435(0.43) 571-596(2.97)                                                                                                                                                                 |
| gnl UG Hs#S2140326  | 0.3  | 1  | 86-114(0.30)                                                                                                                                                                                |
| gnl UG Hs#S2293640  | 0.5  | 1  | 324-349(0.50)                                                                                                                                                                               |
| gnl UG Hs#S15638186 | 1.98 | 5  | 410-436(0.84) 567-592(1.98) 958-983(0.57) 1419-1445(1.40) 1491-1518(1.47)                                                                                                                   |
| gnl UG Hs#S4817833  | 1.17 | 1  | 862-888(1.17)                                                                                                                                                                               |
| gnl UG Hs#S1727374  | 1.68 | 3  | 167-192(1.04) 938-962(1.68) 1894-1919(0.89)                                                                                                                                                 |
| gnl UG Hs#S1732061  | 2.55 | 1  | 552-580(2.55)                                                                                                                                                                               |
| gnl UG Hs#S1726745  | 3.52 | 12 | 250-275(1.08) 410-435(3.15) 2795-2820(3.13) 2826-2851(2.30) 3423-3448(1.40) 3536-3561(3.52) 4399-4427(1.78) 4596-4622(0.88) 4856-4882(1.62) 5124-5150(0.53) 5182-5207(0.94) 5376-5401(0.08) |
| gnl UG Hs#S4812644  | 1.46 | 4  | 705-730(0.40) 885-913(0.92) 1797-1822(1.46) 1946-1972(0.82)                                                                                                                                 |
| gnl UG Hs#S3438577  | 0.84 | 1  | 57-82(0.84)                                                                                                                                                                                 |
| gnl UG Hs#S15730336 | 0.72 | 3  | 413-439(0.72) 630-655(0.33) 659-685(0.38)                                                                                                                                                   |
| gnl UG Hs#S1729597  | 1.5  | 2  | 1265-1290(0.30) 1738-1766(1.50)                                                                                                                                                             |
| gnl UG Hs#S4284769  | 0.57 | 1  | 517-543(0.57)                                                                                                                                                                               |
| gnl UG Hs#S1728220  | 3.84 | 1  | 132-160(3.84)                                                                                                                                                                               |
| gnl UG Hs#S3438964  | 1.68 | 3  | 26-51(1.68) 558-583(1.40) 1033-1059(1.27)                                                                                                                                                   |
| gnl UG Hs#S14802699 | 0.26 | 1  | 115-141(0.26)                                                                                                                                                                               |
| gnl UG Hs#S11046575 | 0.16 | 1  | 845-870(0.16)                                                                                                                                                                               |
| gnl UG Hs#S1969174  | 2.15 | 11 | 330-356(1.17) 918-943(1.98) 964-989(1.21) 1513-1539(2.15) 1563-1589(1.08) 1722-1748(2.01) 2007-2036(0.84) 2135-2160(1.98) 2269-2295(0.50) 2446-2472(0.23) 2635-2660(0.08)                   |
| gnl UG Hs#S1728886  | 0.72 | 1  | 353-378(0.72)                                                                                                                                                                               |
| gnl UG Hs#S2293374  | 0.3  | 1  | 1-26(0.30)                                                                                                                                                                                  |
| gnl UG Hs#S1726818  | 1.4  | 1  | 121-146(1.40)                                                                                                                                                                               |
| gnl UG Hs#S4623566  | 2.94 | 1  | 7-32(2.94)                                                                                                                                                                                  |
| gnl UG Hs#S3219385  | 0.97 | 1  | 900-925(0.97)                                                                                                                                                                               |
| gnl UG Hs#S2294545  | 1.38 | 2  | 233-259(1.38) 391-418(0.84)                                                                                                                                                                 |
| gnl UG Hs#S2140113  | 0.66 | 1  | 883-909(0.66)                                                                                                                                                                               |
| gnl UG Hs#S1726993  | 3.31 | 2  | 225-249(3.31) 296-320(2.11)                                                                                                                                                                 |
| gnl UG Hs#S1824289  | 0.7  | 4  | 471-496(0.70) 734-759(0.55) 1818-1847(0.30) 2343-2369(0.43)                                                                                                                                 |
| gnl UG Hs#S1728422  | 0.45 | 3  | 641-669(0.30) 1879-1904(0.33) 1913-1939(0.45)                                                                                                                                               |
| gnl UG Hs#S3940084  | 1.46 | 2  | 390-415(1.46) 597-623(0.08)                                                                                                                                                                 |
| gnl UG Hs#S15640431 | 1.81 | 1  | 176-204(1.81)                                                                                                                                                                               |

|                     |      |                                                                                                                   |
|---------------------|------|-------------------------------------------------------------------------------------------------------------------|
| gnl UG Hs#S15637218 | 1.5  | 1 1264-1289(1.50)                                                                                                 |
| gnl UG Hs#S3219201  | 0.76 | 1 12-38(0.76)                                                                                                     |
| gnl UG Hs#S4631286  | 2.21 | 2 345-370(1.01) 602-627(2.21)                                                                                     |
| gnl UG Hs#S4619056  | 3.97 | 3 768-796(0.06) 1639-1664(0.17) 1838-1863(3.97)                                                                   |
| gnl UG Hs#S2294091  | 3.2  | 2 255-280(3.20) 304-329(1.14)                                                                                     |
| gnl UG Hs#S2139200  | 4.62 | 4 172-197(4.62) 818-846(1.39) 878-904(2.08) 1479-1504(1.26)                                                       |
| gnl UG Hs#S2140477  | 0.17 | 2 579-605(0.17) 1141-1167(0.08)                                                                                   |
| gnl UG Hs#S15642181 | 0.51 | 1 31-55(0.51)                                                                                                     |
| gnl UG Hs#S2293630  | 1.08 | 2 364-390(1.08) 753-778(0.14)                                                                                     |
| gnl UG Hs#S2293921  | 0.84 | 2 830-856(0.60) 925-950(0.84)                                                                                     |
| gnl UG Hs#S1728128  | 5.07 | 1 342-367(5.07)                                                                                                   |
| gnl UG Hs#S10831882 | 0.62 | 1 248-275(0.62)                                                                                                   |
| gnl UG Hs#S1726380  | 2.17 | 1 261-286(2.17)                                                                                                   |
| gnl UG Hs#S2293522  | 0.17 | 1 1312-1337(0.17)                                                                                                 |
| gnl UG Hs#S3219328  | 1.78 | 1 146-171(1.78)                                                                                                   |
| gnl UG Hs#S14802410 | 2.41 | 3 488-513(2.41) 1255-1283(1.17) 1434-1459(0.14)                                                                   |
| gnl UG Hs#S2139887  | 0.62 | 1 259-283(0.62)                                                                                                   |
| gnl UG Hs#S4807669  | 0.53 | 2 75-100(0.07) 384-410(0.53)                                                                                      |
| gnl UG Hs#S1731196  | 1.94 | 2 384-409(1.94) 1040-1067(0.97)                                                                                   |
| gnl UG Hs#S4620242  | 1.02 | 1 1270-1296(1.02)                                                                                                 |
| gnl UG Hs#S1726739  | 0.43 | 1 559-585(0.43)                                                                                                   |
| gnl UG Hs#S1726371  | 0.4  | 1 608-633(0.40)                                                                                                   |
| gnl UG Hs#S4554436  | 0.87 | 1 1404-1429(0.87)                                                                                                 |
| gnl UG Hs#S6693335  | 1.11 | 2 243-268(1.11) 286-312(0.50)                                                                                     |
| gnl UG Hs#S2332286  | 1.78 | 2 249-274(1.04) 2193-2220(1.78)                                                                                   |
| gnl UG Hs#S1727073  | 1.57 | 1 139-164(1.57)                                                                                                   |
| gnl UG Hs#S3219115  | 1.72 | 2 244-269(1.72) 271-299(0.66)                                                                                     |
| gnl UG Hs#S2294221  | 0.72 | 2 54-79(0.40) 566-589(0.72)                                                                                       |
| gnl UG Hs#S3547241  | 2.66 | 6 465-491(2.66) 648-672(0.31) 1009-1034(0.52) 1177-1202(0.11) 1223-1248(0.33) 1464-1492(1.91)                     |
| gnl UG Hs#S1727932  | 1.2  | 2 343-368(0.57) 765-791(1.20)                                                                                     |
| gnl UG Hs#S10832170 | 0.17 | 1 523-548(0.17)                                                                                                   |
| gnl UG Hs#S1727868  | 2.34 | 3 792-816(1.30) 950-976(2.34) 1865-1892(1.23)                                                                     |
| gnl UG Hs#S2293815  | 0.98 | 1 76-101(0.98)                                                                                                    |
| gnl UG Hs#S2294433  | 1.62 | 1 1015-1040(1.62)                                                                                                 |
| gnl UG Hs#S3355493  | 1.34 | 1 152-177(1.34)                                                                                                   |
| gnl UG Hs#S2139606  | 0.98 | 3 80-103(0.91) 224-252(0.98) 442-467(0.40)                                                                        |
| gnl UG Hs#S1729431  | 0.08 | 2 117-144(0.08) 339-363(0.08)                                                                                     |
| gnl UG Hs#S10832559 | 1.67 | 1 1329-1355(1.67)                                                                                                 |
| gnl UG Hs#S3438649  | 0.34 | 1 120-148(0.34)                                                                                                   |
| gnl UG Hs#S14812302 | 0.21 | 1 2172-2197(0.21)                                                                                                 |
| gnl UG Hs#S3619627  | 1.86 | 2 126-152(0.27) 696-722(1.86)                                                                                     |
| gnl UG Hs#S4807813  | 3.3  | 3 545-570(3.30) 607-631(0.43) 834-859(0.25)                                                                       |
| gnl UG Hs#S2140335  | 2.4  | 3 295-321(1.08) 1285-1317(0.56) 1382-1408(2.40)                                                                   |
| gnl UG Hs#S3601742  | 1.43 | 7 2949-2972(1.21) 3022-3048(1.30) 3074-3099(0.20) 3744-3769(1.23) 3819-3845(1.43) 3897-3922(0.40) 4042-4067(0.88) |
| gnl UG Hs#S5978459  | 1.91 | 1 873-898(1.91)                                                                                                   |
| gnl UG Hs#S10832610 | 1.5  | 4 860-886(0.76) 888-916(0.81) 956-980(0.14) 1418-1444(1.50)                                                       |
| gnl UG Hs#S1728627  | 0.4  | 1 798-823(0.40)                                                                                                   |
| gnl UG Hs#S1728134  | 0.3  | 2 32-57(0.30) 1120-1145(0.21)                                                                                     |
| gnl UG Hs#S2140711  | 1.4  | 1 2330-2355(1.40)                                                                                                 |
| gnl UG Hs#S1729666  | 0.52 | 1 385-410(0.52)                                                                                                   |
| gnl UG Hs#S4046156  | 1.07 | 1 226-251(1.07)                                                                                                   |
| gnl UG Hs#S4285253  | 0.89 | 2 252-275(0.89) 287-312(0.24)                                                                                     |
| gnl UG Hs#S1728196  | 0.2  | 2 294-319(0.20) 410-438(0.20)                                                                                     |
| gnl UG Hs#S1729112  | 1.34 | 1 504-529(1.34)                                                                                                   |

|                     |      |                                                                                                                                |
|---------------------|------|--------------------------------------------------------------------------------------------------------------------------------|
| gnl UG Hs#S4284729  | 1.23 | 1 340-366(1.23)                                                                                                                |
| gnl UG Hs#S3547216  | 1.41 | 3 1888-1911(0.46) 2442-2468(1.41) 2497-2523(0.11)                                                                              |
| gnl UG Hs#S2139091  | 0.8  | 1 272-299(0.80)                                                                                                                |
| gnl UG Hs#S1729964  | 0.36 | 1 370-395(0.36)                                                                                                                |
| gnl UG Hs#S3218968  | 2.79 | 2 3831-3856(2.79) 4145-4171(0.91)                                                                                              |
| gnl UG Hs#S5517785  | 2.52 | 4 46-71(0.41) 516-539(1.40) 621-646(2.52) 735-761(0.51)                                                                        |
| gnl UG Hs#S3619215  | 4.04 | 3 172-197(4.04) 229-254(0.26) 324-349(2.30)                                                                                    |
| gnl UG Hs#S1726939  | 2.72 | 3 1091-1116(2.72) 2325-2350(0.33) 2619-2647(0.17)                                                                              |
| gnl UG Hs#S4553449  | 3.3  | 4 738-763(1.39) 968-993(3.30) 2274-2300(0.62) 2433-2460(0.17)                                                                  |
| gnl UG Hs#S1730397  | 2.9  | 1 412-438(2.90)                                                                                                                |
| gnl UG Hs#S1727015  | 0.81 | 3 419-446(0.81) 566-591(0.36) 622-647(0.40)                                                                                    |
| gnl UG Hs#S1732141  | 0.53 | 1 1088-1116(0.53)                                                                                                              |
| gnl UG Hs#S1824264  | 0.98 | 2 280-305(0.53) 413-439(0.98)                                                                                                  |
| gnl UG Hs#S1727178  | 0.94 | 1 918-943(0.94)                                                                                                                |
| gnl UG Hs#S1729637  | 4.43 | 3 608-633(2.32) 717-742(4.43) 1063-1088(0.89)                                                                                  |
| gnl UG Hs#S5860318  | 0.07 | 1 303-328(0.07)                                                                                                                |
| gnl UG Hs#S3973044  | 1.72 | 2 454-480(1.72) 981-1006(1.30)                                                                                                 |
| gnl UG Hs#S1971570  | 3.58 | 3 1338-1363(1.39) 2117-2142(0.53) 2217-2242(3.58)                                                                              |
| gnl UG Hs#S4616337  | 4.62 | 5 142-168(2.90) 987-1010(4.11) 1053-1080(0.69) 1270-1295(4.62) 1556-1583(0.32)                                                 |
| gnl UG Hs#S5978584  | 1.53 | 3 501-527(1.04) 536-561(1.53) 602-626(0.87)                                                                                    |
| gnl UG Hs#S1729317  | 2.62 | 1 116-141(2.62)                                                                                                                |
| gnl UG Hs#S3219541  | 0.62 | 3 5-31(0.07) 36-61(0.62) 623-650(0.12)                                                                                         |
| gnl UG Hs#S1727163  | 1.3  | 2 14-42(1.30) 555-580(1.24)                                                                                                    |
| gnl UG Hs#S1727010  | 4.21 | 3 211-238(0.24) 312-338(0.12) 409-434(4.21)                                                                                    |
| gnl UG Hs#S2139386  | 2.72 | 4 355-381(0.08) 581-606(0.21) 1151-1179(2.72) 1467-1492(1.20)                                                                  |
| gnl UG Hs#S1731372  | 0.56 | 2 296-323(0.47) 405-432(0.56)                                                                                                  |
| gnl UG Hs#S15633212 | 0.77 | 1 311-336(0.77)                                                                                                                |
| gnl UG Hs#S11046747 | 0.27 | 2 12-38(0.26) 54-79(0.27)                                                                                                      |
| gnl UG Hs#S2140085  | 7.11 | 4 644-672(3.75) 824-849(7.11) 946-974(2.36) 915-940(0.62)                                                                      |
| gnl UG Hs#S2139045  | 2.15 | 4 231-256(0.40) 315-341(0.23) 343-368(2.15) 833-858(0.24)                                                                      |
| gnl UG Hs#S2293580  | 0.71 | 1 862-890(0.71)                                                                                                                |
| gnl UG Hs#S1726387  | 1.71 | 3 340-368(1.71) 400-425(1.26) 546-571(1.48)                                                                                    |
| gnl UG Hs#S15631727 | 1.1  | 3 110-135(0.40) 543-567(1.10) 1075-1100(0.65)                                                                                  |
| gnl UG Hs#S4283574  | 1.14 | 1 1564-1587(1.14)                                                                                                              |
| gnl UG Hs#S15115731 | 2.54 | 1 257-283(2.54)                                                                                                                |
| gnl UG Hs#S4806532  | 0.26 | 1 75-100(0.26)                                                                                                                 |
| gnl UG Hs#S2139642  | 3.91 | 8 114-142(1.30) 977-1002(1.82) 2123-2149(1.04) 2219-2244(1.07) 2247-2273(1.50) 2684-2712(0.62) 3185-3210(3.91) 3359-3385(2.37) |
| gnl UG Hs#S3219126  | 0.23 | 2 949-975(0.21) 1064-1092(0.23)                                                                                                |
| gnl UG Hs#S1727120  | 4.04 | 2 19-47(0.88) 77-102(4.04)                                                                                                     |
| gnl UG Hs#S4808300  | 3.39 | 4 15-41(2.66) 94-120(0.90) 528-554(1.01) 573-597(3.39)                                                                         |
| gnl UG Hs#S3973012  | 2.72 | 1 1289-1314(2.72)                                                                                                              |
| gnl UG Hs#S1731181  | 1.5  | 1 151-177(1.50)                                                                                                                |
| gnl UG Hs#S1726765  | 0.98 | 4 2159-2184(0.13) 2918-2946(0.21) 3055-3082(0.40) 3140-3165(0.98)                                                              |
| gnl UG Hs#S6091962  | 0.08 | 1 232-257(0.08)                                                                                                                |
| gnl UG Hs#S4545989  | 0.46 | 1 367-394(0.46)                                                                                                                |
| gnl UG Hs#S2139445  | 1.98 | 1 1132-1157(1.98)                                                                                                              |
| gnl UG Hs#S11046546 | 1.43 | 3 1725-1750(0.37) 2585-2611(0.76) 2940-2967(1.43)                                                                              |
| gnl UG Hs#S2651896  | 1.5  | 1 138-164(1.50)                                                                                                                |
| gnl UG Hs#S1729819  | 5.55 | 1 237-262(5.55)                                                                                                                |
| gnl UG Hs#S1731256  | 1.81 | 1 1261-1289(1.81)                                                                                                              |
| gnl UG Hs#S15632341 | 0.01 | 1 476-502(0.01)                                                                                                                |
| gnl UG Hs#S4806257  | 1.14 | 1 1259-1285(1.14)                                                                                                              |
| gnl UG Hs#S2139224  | 0.56 | 1 240-263(0.56)                                                                                                                |
| gnl UG Hs#S2140174  | 1.63 | 1 201-226(1.63)                                                                                                                |

|                     |      |                                                                                                                                              |
|---------------------|------|----------------------------------------------------------------------------------------------------------------------------------------------|
| gnl UG Hs#S4807703  | 4.08 | 1 998-1026(4.08)                                                                                                                             |
| gnl UG Hs#S7110922  | 1.39 | 1 108-134(1.39)                                                                                                                              |
| gnl UG Hs#S4810798  | 2.53 | 5 335-360(1.72) 497-522(2.53) 609-634(0.53) 698-724(1.23) 783-808(0.23)                                                                      |
| gnl UG Hs#S4807802  | 0.72 | 1 493-518(0.72)                                                                                                                              |
| gnl UG Hs#S1732369  | 0.69 | 1 222-249(0.69)                                                                                                                              |
| gnl UG Hs#S15644371 | 3.62 | 9 8-32(0.84) 1369-1394(0.08) 1461-1486(0.50) 1521-1547(0.34) 1604-1632(3.62) 1635-1660(1.40) 1719-1744(1.30) 1821-1846(0.79) 1952-1979(0.07) |
| gnl UG Hs#S1728893  | 1.23 | 2 53-79(0.40) 743-768(1.23)                                                                                                                  |
| gnl UG Hs#S5931232  | 2.57 | 1 948-973(2.57)                                                                                                                              |
| gnl UG Hs#S1731422  | 0.4  | 1 2338-2363(0.40)                                                                                                                            |
| gnl UG Hs#S1727126  | 1.57 | 3 119-142(1.57) 220-248(0.40) 515-540(0.30)                                                                                                  |
| gnl UG Hs#S1729723  | 2.53 | 4 128-153(0.26) 250-275(2.53) 336-361(1.53) 369-394(0.63)                                                                                    |
| gnl UG Hs#S2139196  | 3.83 | 4 197-224(3.83) 352-377(1.87) 780-805(1.40) 865-890(2.79)                                                                                    |
| gnl UG Hs#S2138775  | 0.69 | 1 353-376(0.69)                                                                                                                              |
| gnl UG Hs#S4631498  | 0.94 | 2 1064-1089(0.94) 1647-1672(0.43)                                                                                                            |
| gnl UG Hs#S14813081 | 1.88 | 1 87-113(1.88)                                                                                                                               |
| gnl UG Hs#S1729582  | 3.4  | 4 26-52(3.40) 226-252(1.01) 671-697(0.88) 736-762(1.47)                                                                                      |
| gnl UG Hs#S998782   | 1.55 | 1 1059-1084(1.55)                                                                                                                            |
| gnl UG Hs#S3219543  | 0.5  | 1 6-32(0.50)                                                                                                                                 |
| gnl UG Hs#S1730148  | 0.79 | 1 640-666(0.79)                                                                                                                              |
| gnl UG Hs#S2294416  | 1.4  | 1 400-425(1.40)                                                                                                                              |
| gnl UG Hs#S2139042  | 0.49 | 3 1075-1100(0.49) 1769-1797(0.04) 1859-1884(0.04)                                                                                            |
| gnl UG Hs#S1731495  | 1.01 | 1 138-164(1.01)                                                                                                                              |
| gnl UG Hs#S2293407  | 2.98 | 4 80-108(2.55) 451-476(2.62) 739-764(2.98) 902-928(0.39)                                                                                     |
| gnl UG Hs#S2139645  | 1.34 | 1 1918-1945(1.34)                                                                                                                            |
| gnl UG Hs#S4810492  | 0.46 | 1 135-160(0.46)                                                                                                                              |
| gnl UG Hs#S3619558  | 4.72 | 2 326-351(0.51) 734-759(4.72)                                                                                                                |
| gnl UG Hs#S1729113  | 1.01 | 2 207-235(1.01) 248-273(0.84)                                                                                                                |
| gnl UG Hs#S1728941  | 1.5  | 1 15-41(1.50)                                                                                                                                |
| gnl UG Hs#S7110010  | 1.84 | 5 1251-1277(1.08) 1642-1668(1.84) 1909-1934(0.01) 2022-2048(0.57) 2164-2189(0.62)                                                            |
| gnl UG Hs#S2139985  | 1.08 | 1 505-530(1.08)                                                                                                                              |
| gnl UG Hs#S1729206  | 2.53 | 1 432-460(2.53)                                                                                                                              |
| gnl UG Hs#S5931251  | 2.3  | 6 57-80(0.06) 97-120(1.62) 123-149(0.33) 734-760(1.75) 968-993(0.14) 1174-1203(2.30)                                                         |
| gnl UG Hs#S4435935  | 0.46 | 1 1251-1276(0.46)                                                                                                                            |
| gnl UG Hs#S3603154  | 2.79 | 4 304-331(0.94) 460-485(2.79) 1221-1246(0.55) 1252-1278(1.01)                                                                                |
| gnl UG Hs#S2139097  | 3.13 | 4 172-197(0.46) 213-238(3.13) 271-300(0.17) 311-336(1.04)                                                                                    |
| gnl UG Hs#S4553522  | 1.45 | 2 98-126(1.45) 1426-1454(1.04)                                                                                                               |
| gnl UG Hs#S2139409  | 0.62 | 1 196-221(0.62)                                                                                                                              |
| gnl UG Hs#S4824556  | 2.43 | 5 364-390(0.17) 2170-2196(0.58) 2576-2601(0.13) 3265-3291(2.43) 4815-4840(1.01)                                                              |
| gnl UG Hs#S4284709  | 1.53 | 1 854-879(1.53)                                                                                                                              |
| gnl UG Hs#S1824365  | 1.34 | 1 109-134(1.34)                                                                                                                              |
| gnl UG Hs#S1728092  | 0.5  | 1 535-561(0.50)                                                                                                                              |
| gnl UG Hs#S15633680 | 0.49 | 1 108-136(0.49)                                                                                                                              |
| gnl UG Hs#S2294527  | 3.58 | 2 611-637(3.58) 3271-3299(1.04)                                                                                                              |
| gnl UG Hs#S1727578  | 0.3  | 1 1317-1342(0.30)                                                                                                                            |
| gnl UG Hs#S3619562  | 1.98 | 4 35-63(0.47) 355-380(1.66) 526-551(1.98) 773-798(1.80)                                                                                      |
| gnl UG Hs#S4545912  | 1.72 | 2 68-93(0.04) 565-591(1.72)                                                                                                                  |
| gnl UG Hs#S3355648  | 0.66 | 1 119-144(0.66)                                                                                                                              |
| gnl UG Hs#S3826041  | 5.43 | 8 225-250(1.30) 342-367(0.94) 2810-2835(0.39) 2980-3008(0.10) 3146-3171(0.65) 3201-3228(0.52) 3445-3470(5.43) 4084-4109(3.36)                |
| gnl UG Hs#S15643298 | 3.4  | 1 1833-1858(3.40)                                                                                                                            |
| gnl UG Hs#S3438682  | 1.17 | 2 30-58(0.30) 477-501(1.17)                                                                                                                  |
| gnl UG Hs#S12743855 | 0.3  | 1 1093-1118(0.30)                                                                                                                            |
| gnl UG Hs#S4821087  | 1.94 | 2 89-115(1.94) 588-614(1.10)                                                                                                                 |
| gnl UG Hs#S3987764  | 2.52 | 4 92-116(0.20) 1888-1913(2.52) 2679-2703(0.20) 3857-3886(0.24)                                                                               |
| gnl UG Hs#S1730049  | 0.27 | 1 293-319(0.27)                                                                                                                              |

|                     |      |                                                                                                           |
|---------------------|------|-----------------------------------------------------------------------------------------------------------|
| gnl UG Hs#S3219943  | 0.62 | 1 499-525(0.62)                                                                                           |
| gnl UG Hs#S1730922  | 1.84 | 4 669-695(1.84) 1192-1217(0.62) 1772-1796(0.07) 1998-2023(0.91)                                           |
| gnl UG Hs#S4831023  | 2.07 | 1 198-223(2.07)                                                                                           |
| gnl UG Hs#S3322102  | 0.26 | 1 1419-1444(0.26)                                                                                         |
| gnl UG Hs#S2139214  | 0.52 | 2 729-754(0.07) 1173-1201(0.52)                                                                           |
| gnl UG Hs#S2139945  | 3.87 | 1 147-173(3.87)                                                                                           |
| gnl UG Hs#S3219093  | 1.2  | 3 60-87(0.84) 213-239(1.20) 429-454(0.53)                                                                 |
| gnl UG Hs#S4284388  | 1.84 | 6 1052-1078(1.30) 1223-1248(0.77) 1709-1734(0.65) 2444-2469(0.01) 2478-2504(1.84) 2515-2540(0.18)         |
| gnl UG Hs#S2138762  | 2.62 | 5 172-198(2.62) 587-612(2.17) 558-583(1.20) 631-656(0.21) 700-726(0.05)                                   |
| gnl UG Hs#S14812706 | 0.59 | 1 408-434(0.59)                                                                                           |
| gnl UG Hs#S15730228 | 4.53 | 2 1167-1192(1.07) 2235-2262(4.53)                                                                         |
| gnl UG Hs#S1727970  | 2.68 | 2 47-72(2.68) 238-263(0.72)                                                                               |
| gnl UG Hs#S2139574  | 3.49 | 1 81-108(3.49)                                                                                            |
| gnl UG Hs#S2294317  | 1.95 | 1 96-122(1.95)                                                                                            |
| gnl UG Hs#S7111331  | 1.5  | 3 220-246(1.50) 647-672(0.06) 1145-1171(0.01)                                                             |
| gnl UG Hs#S5517151  | 2.49 | 2 54-79(1.17) 204-229(2.49)                                                                               |
| gnl UG Hs#S1969041  | 2.62 | 5 147-172(1.14) 1604-1629(0.81) 1788-1811(0.40) 3906-3931(2.62) 4325-4350(2.33)                           |
| gnl UG Hs#S4046055  | 0.07 | 1 394-422(0.07)                                                                                           |
| gnl UG Hs#S1730945  | 0.51 | 2 410-440(0.51) 598-623(0.28)                                                                             |
| gnl UG Hs#S2139015  | 2.89 | 1 48-73(2.89)                                                                                             |
| gnl UG Hs#S15644801 | 0.46 | 1 34-59(0.46)                                                                                             |
| gnl UG Hs#S1728011  | 2.17 | 2 73-101(0.09) 289-315(2.17)                                                                              |
| gnl UG Hs#S1730410  | 0.08 | 1 800-828(0.08)                                                                                           |
| gnl UG Hs#S2293828  | 0.18 | 1 57-85(0.18)                                                                                             |
| gnl UG Hs#S2140634  | 0.37 | 1 935-958(0.37)                                                                                           |
| gnl UG Hs#S4807640  | 2.3  | 7 298-324(0.54) 747-772(0.76) 889-914(0.55) 966-991(2.30) 1410-1434(0.04) 2098-2124(0.58) 2928-2953(1.62) |
| gnl UG Hs#S4046139  | 1.53 | 1 11-36(1.53)                                                                                             |
| gnl UG Hs#S2294220  | 1.45 | 6 273-300(0.48) 337-365(1.45) 411-437(0.30) 662-687(0.69) 1071-1097(1.13) 1176-1201(0.51)                 |
| gnl UG Hs#S1727309  | 0.72 | 1 106-132(0.72)                                                                                           |
| gnl UG Hs#S3542807  | 2.65 | 4 137-162(0.04) 196-222(2.65) 673-701(0.08) 898-926(1.62)                                                 |
| gnl UG Hs#S2139072  | 3.36 | 1 498-523(3.36)                                                                                           |
| gnl UG Hs#S15631502 | 0.98 | 2 451-477(0.98) 595-620(0.47)                                                                             |
| gnl UG Hs#S3603022  | 0.04 | 2 880-903(0.04) 1258-1283(0.01)                                                                           |
| gnl UG Hs#S6159014  | 1.57 | 1 1052-1078(1.57)                                                                                         |
| gnl UG Hs#S2293820  | 1.39 | 2 1202-1227(0.07) 1286-1313(1.39)                                                                         |
| gnl UG Hs#S4435645  | 1.62 | 3 43-68(0.62) 109-134(0.75) 151-178(1.62)                                                                 |
| gnl UG Hs#S14272718 | 1.67 | 2 383-408(1.67) 810-836(0.43)                                                                             |
| gnl UG Hs#S2293569  | 0.75 | 3 31-57(0.75) 507-534(0.43) 781-807(0.28)                                                                 |
| gnl UG Hs#S2139446  | 0.33 | 2 365-395(0.16) 2567-2592(0.33)                                                                           |
| gnl UG Hs#S3988011  | 0.89 | 2 92-117(0.20) 423-446(0.89)                                                                              |
| gnl UG Hs#S4396126  | 0.46 | 1 397-422(0.46)                                                                                           |
| gnl UG Hs#S2329474  | 2.08 | 1 905-931(2.08)                                                                                           |
| gnl UG Hs#S4837530  | 0.94 | 2 570-598(0.94) 761-787(0.43)                                                                             |
| gnl UG Hs#S3601713  | 3.39 | 3 764-790(0.14) 1024-1049(3.39) 1481-1505(0.31)                                                           |
| gnl UG Hs#S10831626 | 1.13 | 1 300-325(1.13)                                                                                           |
| gnl UG Hs#S1728878  | 2.11 | 1 448-474(2.11)                                                                                           |
| gnl UG Hs#S2140379  | 1.72 | 1 388-412(1.72)                                                                                           |
| gnl UG Hs#S3218956  | 2.08 | 2 12-42(0.67) 740-766(2.08)                                                                               |
| gnl UG Hs#S3989762  | 0.65 | 1 1776-1801(0.65)                                                                                         |
| gnl UG Hs#S1730647  | 2.85 | 6 66-94(0.84) 160-183(0.50) 492-517(1.82) 678-704(2.85) 932-957(0.56) 1030-1055(0.13)                     |
| gnl UG Hs#S5979253  | 0.62 | 2 353-378(0.59) 519-544(0.62)                                                                             |
| gnl UG Hs#S2138989  | 1.08 | 2 3739-3764(1.08) 3876-3904(1.08)                                                                         |
| gnl UG Hs#S1728826  | 1.46 | 1 581-606(1.46)                                                                                           |
| gnl UG Hs#S3619167  | 1.33 | 1 636-661(1.33)                                                                                           |

|                     |      |   |                                                                                        |
|---------------------|------|---|----------------------------------------------------------------------------------------|
| gnl UG Hs#S4545904  | 0.26 | 1 | 2202-2227(0.26)                                                                        |
| gnl UG Hs#S3547219  | 3.25 | 5 | 632-657(0.79) 744-767(3.25) 1305-1331(1.30) 2512-2540(0.76) 8709-8733(0.26)            |
| gnl UG Hs#S3438510  | 4.72 | 1 | 41-66(4.72)                                                                            |
| gnl UG Hs#S1731209  | 3    | 3 | 1070-1094(1.03) 1291-1316(3.00) 4182-4207(1.72)                                        |
| gnl UG Hs#S1731813  | 0.4  | 1 | 449-474(0.40)                                                                          |
| gnl UG Hs#S1729949  | 0.53 | 1 | 539-564(0.53)                                                                          |
| gnl UG Hs#S1727001  | 2.24 | 1 | 584-609(2.24)                                                                          |
| gnl UG Hs#S1726257  | 3.59 | 3 | 904-932(3.59) 1115-1140(0.32) 1305-1333(2.65)                                          |
| gnl UG Hs#S1569566  | 1.26 | 6 | 132-155(0.17) 313-339(1.04) 349-374(1.16) 934-959(0.88) 988-1013(1.26) 1630-1658(0.49) |
| gnl UG Hs#S1726432  | 0.28 | 1 | 667-692(0.28)                                                                          |
| gnl UG Hs#S3439162  | 0.9  | 1 | 3065-3090(0.90)                                                                        |
| gnl UG Hs#S3335070  | 1.34 | 1 | 233-259(1.34)                                                                          |
| gnl UG Hs#S3973048  | 0.13 | 1 | 1205-1232(0.13)                                                                        |
| gnl UG Hs#S1728135  | 2.07 | 3 | 305-331(0.72) 863-888(0.18) 1012-1037(2.07)                                            |
| gnl UG Hs#S4828839  | 2.35 | 3 | 1393-1419(1.40) 1878-1909(2.35) 2157-2183(0.08)                                        |
| gnl UG Hs#S4435872  | 0.07 | 1 | 1016-1043(0.07)                                                                        |
| gnl UG Hs#S4807769  | 2.62 | 1 | 738-766(2.62)                                                                          |
| gnl UG Hs#S14272934 | 0.74 | 1 | 127-152(0.74)                                                                          |
| gnl UG Hs#S1731158  | 4.04 | 4 | 25-50(3.72) 317-340(4.02) 503-528(4.04) 761-786(1.17)                                  |
| gnl UG Hs#S3219330  | 1.76 | 5 | 208-233(0.01) 1771-1799(1.76) 2377-2402(0.72) 2567-2591(0.07) 2640-2665(0.59)          |
| gnl UG Hs#S1824462  | 0.85 | 2 | 193-222(0.85) 301-329(0.59)                                                            |
| gnl UG Hs#S1971583  | 3.98 | 2 | 1306-1331(1.08) 1550-1575(3.98)                                                        |
| gnl UG Hs#S2140088  | 0.69 | 3 | 1159-1184(0.59) 1907-1933(0.69) 2185-2211(0.56)                                        |
| gnl UG Hs#S3219290  | 1.78 | 2 | 1347-1375(1.66) 1731-1756(1.78)                                                        |
| gnl UG Hs#S3219889  | 1.2  | 1 | 896-921(1.20)                                                                          |
| gnl UG Hs#S14273039 | 0.1  | 1 | 260-286(0.10)                                                                          |
| gnl UG Hs#S1727444  | 1.58 | 3 | 188-211(0.47) 300-326(0.17) 435-463(1.58)                                              |
| gnl UG Hs#S2293204  | 3.24 | 3 | 406-432(2.62) 811-837(3.24) 841-867(2.60)                                              |
| gnl UG Hs#S7110568  | 2.68 | 1 | 387-412(2.68)                                                                          |
| gnl UG Hs#S1732130  | 1.21 | 1 | 155-180(1.21)                                                                          |
| gnl UG Hs#S3438848  | 3.82 | 4 | 162-186(1.29) 279-307(2.98) 855-882(1.36) 1297-1323(3.82)                              |
| gnl UG Hs#S3438336  | 6.4  | 1 | 234-260(6.40)                                                                          |
| gnl UG Hs#S3972968  | 0.84 | 1 | 277-302(0.84)                                                                          |
| gnl UG Hs#S5978590  | 1.6  | 1 | 31-57(1.60)                                                                            |
| gnl UG Hs#S4046345  | 0.81 | 1 | 72-97(0.81)                                                                            |
| gnl UG Hs#S2139878  | 0.53 | 3 | 93-118(0.53) 423-447(0.34) 468-493(0.39)                                               |
| gnl UG Hs#S1731510  | 1.69 | 2 | 1196-1221(1.24) 1454-1480(1.69)                                                        |
| gnl UG Hs#S1731513  | 1.26 | 1 | 191-216(1.26)                                                                          |
| gnl UG Hs#S4807753  | 2.04 | 1 | 928-956(2.04)                                                                          |
| gnl UG Hs#S15643304 | 0.08 | 2 | 455-483(0.08) 553-579(0.08)                                                            |
| gnl UG Hs#S2294608  | 2.52 | 1 | 2766-2794(2.52)                                                                        |
| gnl UG Hs#S2139246  | 0.56 | 1 | 108-133(0.56)                                                                          |
| gnl UG Hs#S3619624  | 1.83 | 1 | 97-124(1.83)                                                                           |
| gnl UG Hs#S3619231  | 0.2  | 2 | 782-808(0.20) 1088-1113(0.07)                                                          |
| gnl UG Hs#S3988036  | 0.8  | 2 | 118-146(0.40) 615-639(0.80)                                                            |
| gnl UG Hs#S1638042  | 1.91 | 2 | 15-44(0.31) 955-980(1.91)                                                              |
| gnl UG Hs#S1729539  | 0.46 | 3 | 341-366(0.21) 383-408(0.17) 766-791(0.46)                                              |
| gnl UG Hs#S1824329  | 5.72 | 3 | 842-867(1.48) 1167-1192(0.56) 1235-1260(5.72)                                          |
| gnl UG Hs#S4813330  | 1.82 | 1 | 835-861(1.82)                                                                          |
| gnl UG Hs#S2139424  | 2.94 | 2 | 430-455(2.94) 537-562(0.71)                                                            |
| gnl UG Hs#S1726529  | 2.11 | 2 | 336-359(0.69) 434-457(2.11)                                                            |
| gnl UG Hs#S15640501 | 0.81 | 1 | 307-332(0.81)                                                                          |
| gnl UG Hs#S3619173  | 0.07 | 1 | 788-813(0.07)                                                                          |
| gnl UG Hs#S6159089  | 2.23 | 3 | 408-434(0.60) 1376-1401(2.23) 1411-1436(1.08)                                          |

|                     |      |    |                                                                                                                                                       |
|---------------------|------|----|-------------------------------------------------------------------------------------------------------------------------------------------------------|
| gnl UG Hs#S2293547  | 3.56 | 4  | 203-228(1.07) 925-953(0.71) 1031-1055(3.56) 1605-1630(1.85)                                                                                           |
| gnl UG Hs#S3814677  | 0.4  | 1  | 76-104(0.40)                                                                                                                                          |
| gnl UG Hs#S4810669  | 1.43 | 2  | 1437-1463(1.43) 1732-1755(1.26)                                                                                                                       |
| gnl UG Hs#S1730224  | 4.11 | 1  | 155-182(4.11)                                                                                                                                         |
| gnl UG Hs#S4631188  | 2.9  | 9  | 449-475(0.40) 488-513(2.90) 764-792(1.56) 892-917(1.13) 1343-1368(0.26) 1478-1504(0.14) 1657-1684(2.07) 2035-2061(0.44) 2495-2521(1.47)               |
| gnl UG Hs#S1727928  | 1.06 | 2  | 294-318(1.06) 319-344(0.98)                                                                                                                           |
| gnl UG Hs#S3837782  | 3.11 | 4  | 472-498(1.23) 549-573(0.55) 696-721(1.29) 802-827(3.11)                                                                                               |
| gnl UG Hs#S2138917  | 0.86 | 1  | 242-268(0.86)                                                                                                                                         |
| gnl UG Hs#S4631449  | 4.36 | 6  | 116-144(0.98) 334-359(0.72) 502-528(1.07) 1117-1142(0.08) 1260-1285(0.26) 1298-1323(4.36)                                                             |
| gnl UG Hs#S4820107  | 3.46 | 3  | 47-72(0.56) 141-166(3.46) 422-447(0.22)                                                                                                               |
| gnl UG Hs#S2139129  | 0.82 | 2  | 245-271(0.82) 468-493(0.40)                                                                                                                           |
| gnl UG Hs#S1726781  | 0.61 | 1  | 586-614(0.61)                                                                                                                                         |
| gnl UG Hs#S1727593  | 5.36 | 4  | 262-287(5.36) 841-868(0.92) 1243-1268(0.16) 1680-1705(0.46)                                                                                           |
| gnl UG Hs#S2293355  | 3.46 | 1  | 843-869(3.46)                                                                                                                                         |
| gnl UG Hs#S3602313  | 0.91 | 2  | 154-180(0.89) 305-331(0.91)                                                                                                                           |
| gnl UG Hs#S4811476  | 0.08 | 1  | 109-134(0.08)                                                                                                                                         |
| gnl UG Hs#S15636111 | 2.62 | 3  | 444-469(0.20) 794-817(2.62) 982-1007(0.87)                                                                                                            |
| gnl UG Hs#S1824369  | 3.85 | 4  | 299-325(3.56) 562-587(3.85) 863-891(1.20) 952-977(3.72)                                                                                               |
| gnl UG Hs#S1728048  | 2.04 | 2  | 956-982(2.04) 1134-1158(1.40)                                                                                                                         |
| gnl UG Hs#S4819147  | 0.52 | 1  | 848-875(0.52)                                                                                                                                         |
| gnl UG Hs#S3439013  | 2.82 | 1  | 1495-1520(2.82)                                                                                                                                       |
| gnl UG Hs#S3438582  | 0.04 | 1  | 466-491(0.04)                                                                                                                                         |
| gnl UG Hs#S4631384  | 0.81 | 2  | 171-196(0.26) 264-292(0.81)                                                                                                                           |
| gnl UG Hs#S1731259  | 0.2  | 1  | 582-607(0.20)                                                                                                                                         |
| gnl UG Hs#S2293590  | 4.11 | 2  | 114-139(4.11) 480-506(0.44)                                                                                                                           |
| gnl UG Hs#S3439063  | 2.1  | 2  | 37-63(2.10) 110-136(0.11)                                                                                                                             |
| gnl UG Hs#S2293793  | 3.4  | 7  | 622-645(0.67) 1041-1066(0.97) 1143-1171(3.40) 1301-1329(0.90) 1680-1705(0.89) 1999-2025(0.36) 2302-2327(1.73)                                         |
| gnl UG Hs#S1726547  | 1.78 | 1  | 221-246(1.78)                                                                                                                                         |
| gnl UG Hs#S7111144  | 2.17 | 5  | 1189-1215(1.18) 1805-1833(1.09) 1871-1896(1.59) 1909-1935(2.17) 1967-1993(1.08)                                                                       |
| gnl UG Hs#S5978533  | 0.1  | 1  | 1516-1542(0.10)                                                                                                                                       |
| gnl UG Hs#S4284755  | 0.16 | 1  | 439-467(0.16)                                                                                                                                         |
| gnl UG Hs#S1824551  | 0.58 | 1  | 83-109(0.58)                                                                                                                                          |
| gnl UG Hs#S3973106  | 0.43 | 3  | 361-386(0.17) 991-1018(0.43) 1092-1116(0.12)                                                                                                          |
| gnl UG Hs#S2140609  | 3.15 | 1  | 429-454(3.15)                                                                                                                                         |
| gnl UG Hs#S4828802  | 2.15 | 3  | 951-976(0.53) 3252-3278(2.15) 4285-4313(0.44)                                                                                                         |
| gnl UG Hs#S4807967  | 1.72 | 3  | 91-116(1.72) 745-770(0.55) 879-904(0.70)                                                                                                              |
| gnl UG Hs#S4809985  | 1.75 | 4  | 791-816(1.17) 1748-1774(1.30) 1873-1899(1.75) 2062-2090(0.23)                                                                                         |
| gnl UG Hs#S2139765  | 2.3  | 5  | 60-88(1.17) 355-380(0.98) 653-677(0.85) 1283-1309(0.76) 1371-1394(2.30)                                                                               |
| gnl UG Hs#S15631498 | 0.62 | 1  | 2533-2558(0.62)                                                                                                                                       |
| gnl UG Hs#S1730153  | 0.72 | 4  | 355-378(0.47) 1825-1851(0.72) 1975-2003(0.23) 2043-2068(0.72)                                                                                         |
| gnl UG Hs#S1728081  | 0.75 | 1  | 568-596(0.75)                                                                                                                                         |
| gnl UG Hs#S1729225  | 0.72 | 1  | 266-291(0.72)                                                                                                                                         |
| gnl UG Hs#S3219753  | 2.94 | 2  | 420-448(2.94) 1360-1384(0.82)                                                                                                                         |
| gnl UG Hs#S3988008  | 0.34 | 1  | 237-262(0.34)                                                                                                                                         |
| gnl UG Hs#S1728628  | 2.04 | 2  | 144-169(2.04) 405-431(1.37)                                                                                                                           |
| gnl UG Hs#S4616835  | 0.39 | 1  | 1381-1410(0.39)                                                                                                                                       |
| gnl UG Hs#S4392129  | 1.3  | 1  | 412-437(1.30)                                                                                                                                         |
| gnl UG Hs#S4827234  | 1.72 | 1  | 559-584(1.72)                                                                                                                                         |
| gnl UG Hs#S5931263  | 5.39 | 10 | 135-160(1.57) 479-506(2.75) 568-593(0.04) 767-793(1.23) 858-883(5.39) 1096-1121(3.92) 1257-1282(0.91) 1634-1660(0.12) 1836-1861(1.50) 2189-2217(0.20) |
| gnl UG Hs#S2293714  | 1.08 | 3  | 512-537(1.07) 2105-2134(1.08) 2178-2203(0.72)                                                                                                         |
| gnl UG Hs#S14913552 | 4.31 | 1  | 168-194(4.31)                                                                                                                                         |
| gnl UG Hs#S3220009  | 0.82 | 2  | 525-551(0.82) 671-697(0.40)                                                                                                                           |
| gnl UG Hs#S4630968  | 1.04 | 1  | 2679-2704(1.04)                                                                                                                                       |
| gnl UG Hs#S6682888  | 1.98 | 1  | 183-208(1.98)                                                                                                                                         |



|                     |      |   |                 |                 |                 |                 |                                                 |
|---------------------|------|---|-----------------|-----------------|-----------------|-----------------|-------------------------------------------------|
| gnl UG Hs#S4819386  | 5.3  | 5 | 922-948(0.81)   | 1245-1270(2.98) | 1518-1544(5.30) | 1600-1625(2.05) | 1645-1670(1.17)                                 |
| gnl UG Hs#S3619086  | 3.4  | 1 | 1213-1238(3.40) |                 |                 |                 |                                                 |
| gnl UG Hs#S1728783  | 2.92 | 1 | 54-80(2.92)     |                 |                 |                 |                                                 |
| gnl UG Hs#S3438740  | 0.84 | 2 | 364-389(0.84)   | 475-500(0.46)   |                 |                 |                                                 |
| gnl UG Hs#S2293951  | 0.18 | 1 | 34-58(0.18)     |                 |                 |                 |                                                 |
| gnl UG Hs#S2293328  | 2.77 | 1 | 602-629(2.77)   |                 |                 |                 |                                                 |
| gnl UG Hs#S2139476  | 3.04 | 4 | 226-251(1.30)   | 1518-1543(1.30) | 1612-1638(3.04) | 2731-2756(0.17) |                                                 |
| gnl UG Hs#S4616450  | 4.11 | 7 | 992-1020(0.23)  | 1263-1289(1.30) | 1495-1520(1.68) | 1661-1686(1.26) | 1713-1739(0.40) 2389-2415(4.11) 2694-2719(2.78) |
| gnl UG Hs#S7111789  | 1.03 | 1 | 260-285(1.03)   |                 |                 |                 |                                                 |
| gnl UG Hs#S4822343  | 4.85 | 2 | 394-419(4.85)   | 614-640(0.27)   |                 |                 |                                                 |
| gnl UG Hs#S1726570  | 0.72 | 1 | 128-155(0.72)   |                 |                 |                 |                                                 |
| gnl UG Hs#S3973082  | 1.39 | 2 | 1580-1606(1.27) | 2327-2352(1.39) |                 |                 |                                                 |
| gnl UG Hs#S1729291  | 0.52 | 2 | 37-63(0.23)     | 1161-1186(0.52) |                 |                 |                                                 |
| gnl UG Hs#S1727506  | 3.94 | 1 | 277-302(3.94)   |                 |                 |                 |                                                 |
| gnl UG Hs#S7111202  | 2.47 | 1 | 456-481(2.47)   |                 |                 |                 |                                                 |
| gnl UG Hs#S1731353  | 3.3  | 4 | 458-483(1.62)   | 872-898(0.91)   | 915-940(3.30)   | 1095-1120(0.46) |                                                 |
| gnl UG Hs#S1726632  | 0.08 | 1 | 115-140(0.08)   |                 |                 |                 |                                                 |
| gnl UG Hs#S4809373  | 2.6  | 2 | 188-211(0.65)   | 389-415(2.60)   |                 |                 |                                                 |
| gnl UG Hs#S1729630  | 2.9  | 2 | 347-372(2.90)   | 393-418(0.35)   |                 |                 |                                                 |
| gnl UG Hs#S2293498  | 2.94 | 2 | 533-562(2.94)   | 913-938(0.40)   |                 |                 |                                                 |
| gnl UG Hs#S4631000  | 3.11 | 2 | 420-445(0.65)   | 591-616(3.11)   |                 |                 |                                                 |
| gnl UG Hs#S1731048  | 1    | 2 | 161-189(0.91)   | 715-740(1.00)   |                 |                 |                                                 |
| gnl UG Hs#S1824352  | 0.68 | 1 | 3506-3531(0.68) |                 |                 |                 |                                                 |
| gnl UG Hs#S15730304 | 1.27 | 2 | 171-199(1.27)   | 572-596(0.65)   |                 |                 |                                                 |
| gnl UG Hs#S2139207  | 2.68 | 7 | 88-113(0.91)    | 216-241(2.68)   | 1727-1753(1.33) | 2111-2134(0.85) | 2147-2172(1.40) 2217-2242(0.21) 2276-2304(1.81) |
| gnl UG Hs#S15643962 | 3.4  | 3 | 588-613(0.30)   | 1074-1099(3.40) | 1290-1315(3.30) |                 |                                                 |
| gnl UG Hs#S3817913  | 0.93 | 1 | 34-60(0.93)     |                 |                 |                 |                                                 |
| gnl UG Hs#S4553426  | 1.91 | 2 | 115-142(1.91)   | 433-457(0.75)   |                 |                 |                                                 |
| gnl UG Hs#S7111731  | 2.19 | 1 | 330-355(2.19)   |                 |                 |                 |                                                 |
| gnl UG Hs#S15638662 | 0.08 | 1 | 848-874(0.08)   |                 |                 |                 |                                                 |
| gnl UG Hs#S4813540  | 2.17 | 1 | 1199-1225(2.17) |                 |                 |                 |                                                 |
| gnl UG Hs#S11046650 | 1.17 | 2 | 613-636(0.57)   | 873-898(1.17)   |                 |                 |                                                 |
| gnl UG Hs#S2294045  | 0.72 | 3 | 89-115(0.67)    | 743-771(0.01)   | 1617-1642(0.72) |                 |                                                 |
| gnl UG Hs#S2294173  | 2.11 | 1 | 395-420(2.11)   |                 |                 |                 |                                                 |
| gnl UG Hs#S2139259  | 0.46 | 1 | 175-200(0.46)   |                 |                 |                 |                                                 |
| gnl UG Hs#S3838259  | 1.52 | 1 | 1516-1543(1.52) |                 |                 |                 |                                                 |
| gnl UG Hs#S3219890  | 1.24 | 3 | 17-42(0.53)     | 626-651(0.43)   | 671-694(1.24)   |                 |                                                 |
| gnl UG Hs#S3335613  | 2.39 | 5 | 74-99(0.04)     | 450-475(2.39)   | 591-616(0.65)   | 786-811(0.49)   | 906-931(0.97)                                   |
| gnl UG Hs#S15637724 | 1.13 | 1 | 297-323(1.13)   |                 |                 |                 |                                                 |
| gnl UG Hs#S1726622  | 0.88 | 1 | 115-143(0.88)   |                 |                 |                 |                                                 |
| gnl UG Hs#S1728910  | 0.04 | 1 | 950-975(0.04)   |                 |                 |                 |                                                 |
| gnl UG Hs#S5860294  | 0.63 | 1 | 500-525(0.63)   |                 |                 |                 |                                                 |
| gnl UG Hs#S3333523  | 2.75 | 4 | 24-50(2.53)     | 82-109(0.02)    | 521-547(2.20)   | 591-616(2.75)   |                                                 |
| gnl UG Hs#S1729735  | 2.3  | 2 | 86-111(2.30)    | 114-139(0.48)   |                 |                 |                                                 |
| gnl UG Hs#S4807586  | 1.76 | 4 | 641-668(0.43)   | 873-898(0.23)   | 1362-1388(1.76) | 1412-1439(0.89) |                                                 |
| gnl UG Hs#S2140484  | 1.98 | 3 | 477-502(1.98)   | 859-884(0.20)   | 1079-1105(0.67) |                 |                                                 |
| gnl UG Hs#S1726690  | 2.82 | 1 | 125-151(2.82)   |                 |                 |                 |                                                 |
| gnl UG Hs#S1727819  | 1.72 | 2 | 194-217(0.80)   | 316-342(1.72)   |                 |                 |                                                 |
| gnl UG Hs#S4810839  | 1    | 1 | 2708-2736(1.00) |                 |                 |                 |                                                 |
| gnl UG Hs#S1367654  | 0.55 | 2 | 395-420(0.55)   | 738-764(0.34)   |                 |                 |                                                 |
| gnl UG Hs#S1732271  | 3.4  | 1 | 546-572(3.40)   |                 |                 |                 |                                                 |
| gnl UG Hs#S1730779  | 4.23 | 1 | 255-281(4.23)   |                 |                 |                 |                                                 |
| gnl UG Hs#S1731470  | 2.26 | 3 | 208-233(2.26)   | 842-866(0.66)   | 871-896(1.40)   |                 |                                                 |
| gnl UG Hs#S1728656  | 1.82 | 2 | 261-286(0.72)   | 550-575(1.82)   |                 |                 |                                                 |

|                     |      |                                                                                                        |
|---------------------|------|--------------------------------------------------------------------------------------------------------|
| gnl UG Hs#S2140306  | 0.01 | 1 83-110(0.01)                                                                                         |
| gnl UG Hs#S15634589 | 0.17 | 1 377-403(0.17)                                                                                        |
| gnl UG Hs#S3355468  | 4.45 | 1 1860-1885(4.45)                                                                                      |
| gnl UG Hs#S3993471  | 0.77 | 2 513-538(0.77) 749-775(0.10)                                                                          |
| gnl UG Hs#S1971548  | 1.68 | 4 141-168(1.46) 364-389(1.68) 536-564(0.90) 907-932(0.57)                                              |
| gnl UG Hs#S5930884  | 0.17 | 1 346-371(0.17)                                                                                        |
| gnl UG Hs#S3219475  | 3.04 | 4 234-257(1.43) 656-681(3.04) 818-844(0.67) 995-1020(0.98)                                             |
| gnl UG Hs#S3817915  | 1.94 | 2 841-866(0.84) 1094-1119(1.94)                                                                        |
| gnl UG Hs#S2294456  | 4.43 | 2 331-356(4.43) 375-400(2.49)                                                                          |
| gnl UG Hs#S2293664  | 1.67 | 2 187-213(0.50) 462-488(1.67)                                                                          |
| gnl UG Hs#S1731957  | 3.37 | 1 514-539(3.37)                                                                                        |
| gnl UG Hs#S15631520 | 3.87 | 2 1106-1131(3.87) 1405-1433(0.16)                                                                      |
| gnl UG Hs#S3438390  | 0.49 | 1 87-113(0.49)                                                                                         |
| gnl UG Hs#S1728186  | 1.08 | 1 864-890(1.08)                                                                                        |
| gnl UG Hs#S14272908 | 1.88 | 5 404-429(0.15) 914-942(1.88) 1732-1757(0.82) 2050-2078(0.65) 2199-2226(1.40)                          |
| gnl UG Hs#S1824572  | 1.57 | 2 381-406(0.20) 458-483(1.57)                                                                          |
| gnl UG Hs#S1731784  | 3.72 | 3 226-251(0.89) 1250-1275(3.72) 1337-1362(1.49)                                                        |
| gnl UG Hs#S2294345  | 0.3  | 1 351-379(0.30)                                                                                        |
| gnl UG Hs#S1728980  | 1.66 | 2 436-461(1.24) 2182-2210(1.66)                                                                        |
| gnl UG Hs#S10817831 | 0.07 | 1 505-530(0.07)                                                                                        |
| gnl UG Hs#S1726378  | 4.72 | 3 575-600(0.17) 723-749(4.72) 895-920(0.11)                                                            |
| gnl UG Hs#S1731822  | 0.33 | 1 81-107(0.33)                                                                                         |
| gnl UG Hs#S2139167  | 0.04 | 1 1176-1201(0.04)                                                                                      |
| gnl UG Hs#S3438482  | 2.46 | 1 895-920(2.46)                                                                                        |
| gnl UG Hs#S11046551 | 0.4  | 1 142-167(0.40)                                                                                        |
| gnl UG Hs#S1728491  | 0.6  | 1 97-123(0.60)                                                                                         |
| gnl UG Hs#S2139772  | 0.94 | 2 737-762(0.56) 1277-1302(0.94)                                                                        |
| gnl UG Hs#S3219966  | 1.79 | 2 419-444(1.23) 1172-1197(1.79)                                                                        |
| gnl UG Hs#S4822191  | 0.76 | 1 423-448(0.76)                                                                                        |
| gnl UG Hs#S2294178  | 1.8  | 3 161-186(1.80) 853-881(0.77) 1044-1070(1.14)                                                          |
| gnl UG Hs#S4546024  | 1.97 | 2 701-724(1.97) 1940-1968(0.23)                                                                        |
| gnl UG Hs#S998789   | 0.5  | 1 362-387(0.50)                                                                                        |
| gnl UG Hs#S1731214  | 1.2  | 1 169-197(1.20)                                                                                        |
| gnl UG Hs#S4046147  | 2.3  | 4 77-105(0.04) 266-292(1.17) 470-498(1.35) 561-586(2.30)                                               |
| gnl UG Hs#S2138966  | 1.47 | 5 538-563(0.71) 732-760(0.09) 826-852(0.69) 1420-1445(0.53) 1947-1972(1.47)                            |
| gnl UG Hs#S1728492  | 2.78 | 2 99-124(2.78) 133-160(0.14)                                                                           |
| gnl UG Hs#S1726403  | 4.99 | 1 35-60(4.99)                                                                                          |
| gnl UG Hs#S5930817  | 2.29 | 3 100-125(0.75) 308-333(2.29) 347-374(0.48)                                                            |
| gnl UG Hs#S4807578  | 1.74 | 2 1501-1526(1.74) 1544-1569(0.14)                                                                      |
| gnl UG Hs#S2293537  | 0.65 | 1 387-412(0.65)                                                                                        |
| gnl UG Hs#S6159042  | 1.94 | 1 601-626(1.94)                                                                                        |
| gnl UG Hs#S1730068  | 1.56 | 4 123-149(1.56) 665-694(0.60) 1544-1569(0.39) 1601-1626(0.13)                                          |
| gnl UG Hs#S4618971  | 3.24 | 3 132-157(1.68) 428-456(3.24) 576-602(0.01)                                                            |
| gnl UG Hs#S569432   | 0.62 | 1 932-957(0.62)                                                                                        |
| gnl UG Hs#S1732243  | 1.01 | 1 601-627(1.01)                                                                                        |
| gnl UG Hs#S1728475  | 5.23 | 2 92-117(1.17) 658-683(5.23)                                                                           |
| gnl UG Hs#S3438721  | 4.4  | 7 96-121(1.14) 169-194(4.40) 570-595(0.07) 804-832(0.62) 960-985(0.17) 1041-1066(0.58) 1116-1143(0.03) |
| gnl UG Hs#S2140194  | 2.95 | 1 44-67(2.95)                                                                                          |
| gnl UG Hs#S2139620  | 2.97 | 1 556-581(2.97)                                                                                        |
| gnl UG Hs#S4284844  | 2.68 | 3 78-104(2.12) 213-245(0.33) 418-442(2.68)                                                             |
| gnl UG Hs#S3219665  | 1.03 | 1 102-130(1.03)                                                                                        |
| gnl UG Hs#S1727930  | 2.86 | 3 124-147(0.04) 331-357(2.86) 420-448(1.01)                                                            |
| gnl UG Hs#S4613862  | 0.23 | 1 513-541(0.23)                                                                                        |
| gnl UG Hs#S7111303  | 3.75 | 3 358-383(3.75) 420-446(3.14) 1326-1351(1.50)                                                          |

|                     |      |                                                                                                                             |
|---------------------|------|-----------------------------------------------------------------------------------------------------------------------------|
| gnl UG Hs#S4435869  | 1.89 | 2 1773-1800(0.65) 2193-2219(1.89)                                                                                           |
| gnl UG Hs#S4813475  | 0.53 | 2 342-367(0.53) 591-616(0.53)                                                                                               |
| gnl UG Hs#S1728763  | 0.81 | 1 142-170(0.81)                                                                                                             |
| gnl UG Hs#S5978518  | 2.74 | 3 1824-1848(0.26) 2120-2146(2.74) 2301-2326(1.79)                                                                           |
| gnl UG Hs#S4831114  | 2.4  | 2 46-74(2.40) 318-344(0.75)                                                                                                 |
| gnl UG Hs#S4284326  | 0.93 | 2 2099-2125(0.43) 2244-2267(0.93)                                                                                           |
| gnl UG Hs#S1244988  | 2.62 | 3 420-444(1.58) 2548-2574(0.34) 2996-3021(2.62)                                                                             |
| gnl UG Hs#S1730058  | 2.79 | 3 124-149(0.41) 1070-1095(0.75) 1136-1161(2.79)                                                                             |
| gnl UG Hs#S3837523  | 0.26 | 1 693-718(0.26)                                                                                                             |
| gnl UG Hs#S3438808  | 3.6  | 2 234-260(2.33) 930-959(3.60)                                                                                               |
| gnl UG Hs#S1729711  | 0.5  | 1 452-477(0.50)                                                                                                             |
| gnl UG Hs#S1726797  | 0.33 | 1 296-324(0.33)                                                                                                             |
| gnl UG Hs#S3219698  | 2.07 | 5 693-720(1.43) 1127-1153(0.91) 1215-1243(2.07) 1251-1276(1.72) 1382-1407(0.85)                                             |
| gnl UG Hs#S1727565  | 2.27 | 1 218-244(2.27)                                                                                                             |
| gnl UG Hs#S5930919  | 2.3  | 4 350-378(1.34) 992-1017(2.30) 1116-1141(0.30) 1478-1504(0.62)                                                              |
| gnl UG Hs#S2140423  | 2.72 | 2 808-832(0.36) 1555-1580(2.72)                                                                                             |
| gnl UG Hs#S1726639  | 1.33 | 1 583-609(1.33)                                                                                                             |
| gnl UG Hs#S3220216  | 2.58 | 1 357-383(2.58)                                                                                                             |
| gnl UG Hs#S1730862  | 3.21 | 4 316-342(3.21) 563-589(1.97) 624-651(0.07) 678-702(1.32)                                                                   |
| gnl UG Hs#S11046631 | 4.04 | 1 709-734(4.04)                                                                                                             |
| gnl UG Hs#S2294036  | 1.98 | 1 197-223(1.98)                                                                                                             |
| gnl UG Hs#S7089853  | 1.17 | 1 811-836(1.17)                                                                                                             |
| gnl UG Hs#S2294210  | 6.18 | 1 1899-1925(6.18)                                                                                                           |
| gnl UG Hs#S2294276  | 0.61 | 2 466-494(0.40) 741-767(0.61)                                                                                               |
| gnl UG Hs#S3601706  | 4.3  | 1 809-834(4.30)                                                                                                             |
| gnl UG Hs#S2294654  | 2.01 | 1 123-148(2.01)                                                                                                             |
| gnl UG Hs#S5978456  | 2.84 | 1 669-698(2.84)                                                                                                             |
| gnl UG Hs#S1732423  | 1.65 | 4 277-302(0.81) 862-890(0.04) 1446-1472(1.65) 1791-1817(0.61)                                                               |
| gnl UG Hs#S5930935  | 3.4  | 8 148-173(0.13) 383-408(2.30) 836-861(2.03) 1181-1206(3.40) 1261-1286(0.72) 1347-1372(0.26) 1484-1509(0.92) 1675-1701(1.89) |
| gnl UG Hs#S3601690  | 2.65 | 2 565-589(2.22) 826-851(2.65)                                                                                               |
| gnl UG Hs#S1730037  | 3.3  | 4 188-214(3.30) 1980-2008(1.71) 2172-2197(0.39) 2413-2438(0.46)                                                             |
| gnl UG Hs#S4816410  | 2.01 | 4 422-448(1.46) 618-646(0.08) 972-997(0.04) 1149-1179(2.01)                                                                 |
| gnl UG Hs#S1731625  | 1.53 | 1 84-109(1.53)                                                                                                              |
| gnl UG Hs#S3619248  | 0.39 | 1 582-607(0.39)                                                                                                             |
| gnl UG Hs#S7113298  | 4.7  | 2 3233-3258(4.70) 3802-3827(2.04)                                                                                           |
| gnl UG Hs#S4807614  | 2.14 | 2 276-302(2.14) 661-686(0.08)                                                                                               |
| gnl UG Hs#S15635073 | 3.27 | 5 38-64(3.27) 108-135(0.34) 186-214(2.88) 370-395(1.53) 406-431(0.17)                                                       |
| gnl UG Hs#S2138682  | 1.72 | 3 208-233(1.72) 530-558(1.35) 758-783(0.39)                                                                                 |
| gnl UG Hs#S1731732  | 4.24 | 1 185-213(4.24)                                                                                                             |
| gnl UG Hs#S3991229  | 1.98 | 1 132-160(1.98)                                                                                                             |
| gnl UG Hs#S11154088 | 0.17 | 1 1053-1078(0.17)                                                                                                           |
| gnl UG Hs#S1732412  | 1.35 | 1 770-798(1.35)                                                                                                             |
| gnl UG Hs#S4046548  | 1.54 | 2 53-79(1.04) 87-113(1.54)                                                                                                  |
| gnl UG Hs#S6158995  | 6.5  | 2 33-59(6.50) 228-253(0.24)                                                                                                 |
| gnl UG Hs#S1824334  | 2.23 | 4 91-116(2.23) 180-205(0.41) 302-327(1.01) 415-443(0.97)                                                                    |
| gnl UG Hs#S2293267  | 3.46 | 3 433-458(1.07) 861-886(0.61) 979-1003(3.46)                                                                                |
| gnl UG Hs#S4621398  | 2.53 | 6 331-356(2.53) 406-431(1.26) 798-821(0.25) 1185-1210(2.13) 1629-1654(2.15) 1675-1700(0.14)                                 |
| gnl UG Hs#S11046609 | 0.72 | 1 1076-1101(0.72)                                                                                                           |
| gnl UG Hs#S1824408  | 1.36 | 1 117-142(1.36)                                                                                                             |
| gnl UG Hs#S2138956  | 0.91 | 1 630-656(0.91)                                                                                                             |
| gnl UG Hs#S1731620  | 3.14 | 2 190-215(3.14) 542-571(0.71)                                                                                               |
| gnl UG Hs#S1731829  | 3.3  | 6 1322-1348(3.30) 1718-1746(0.49) 1887-1915(0.18) 2061-2086(0.20) 2185-2209(0.33) 2359-2388(0.74)                           |
| gnl UG Hs#S4841582  | 2.32 | 3 23-48(1.82) 1208-1236(0.08) 2310-2335(2.32)                                                                               |
| gnl UG Hs#S2139613  | 5.11 | 6 440-465(5.11) 1233-1258(0.07) 1379-1404(2.60) 1654-1679(0.14) 1789-1815(0.23) 2119-2144(1.04)                             |

|                     |      |   |                                                                                                             |
|---------------------|------|---|-------------------------------------------------------------------------------------------------------------|
| gnl UG Hs#S1726543  | 0.87 | 2 | 108-134(0.08) 542-567(0.87)                                                                                 |
| gnl UG Hs#S5978496  | 0.77 | 2 | 167-193(0.30) 499-527(0.77)                                                                                 |
| gnl UG Hs#S4283978  | 0.62 | 1 | 227-252(0.62)                                                                                               |
| gnl UG Hs#S2140419  | 0.58 | 2 | 634-659(0.36) 1234-1259(0.58)                                                                               |
| gnl UG Hs#S2294422  | 0.67 | 1 | 17-42(0.67)                                                                                                 |
| gnl UG Hs#S1727805  | 2.78 | 3 | 171-196(0.11) 846-871(2.78) 875-901(0.93)                                                                   |
| gnl UG Hs#S1727377  | 0.46 | 1 | 151-176(0.46)                                                                                               |
| gnl UG Hs#S1824494  | 0.29 | 1 | 669-695(0.29)                                                                                               |
| gnl UG Hs#S5516863  | 2.46 | 1 | 994-1019(2.46)                                                                                              |
| gnl UG Hs#S15642842 | 0.25 | 2 | 200-225(0.20) 529-554(0.25)                                                                                 |
| gnl UG Hs#S3219174  | 3.2  | 3 | 80-105(0.91) 199-224(3.20) 638-664(2.65)                                                                    |
| gnl UG Hs#S4284767  | 1.33 | 3 | 200-225(1.33) 325-350(0.30) 617-642(0.29)                                                                   |
| gnl UG Hs#S3219611  | 3.47 | 7 | 328-353(0.07) 888-914(0.99) 1249-1274(1.68) 1323-1349(2.98) 1374-1399(3.13) 1558-1584(0.76) 1654-1678(3.47) |
| gnl UG Hs#S4829433  | 2.72 | 2 | 126-154(2.72) 419-444(0.58)                                                                                 |
| gnl UG Hs#S1730383  | 0.26 | 1 | 1368-1393(0.26)                                                                                             |
| gnl UG Hs#S15634876 | 0.98 | 1 | 331-357(0.98)                                                                                               |
| gnl UG Hs#S3439096  | 0.81 | 1 | 50-78(0.81)                                                                                                 |
| gnl UG Hs#S4820111  | 4.58 | 3 | 233-258(4.58) 888-913(2.23) 956-981(1.14)                                                                   |
| gnl UG Hs#S2139463  | 2.92 | 1 | 1723-1749(2.92)                                                                                             |
| gnl UG Hs#S4614603  | 2.94 | 3 | 1797-1823(0.50) 1893-1918(2.94) 2023-2048(1.19)                                                             |
| gnl UG Hs#S4554583  | 1.23 | 2 | 681-706(1.23) 737-762(0.23)                                                                                 |
| gnl UG Hs#S3619726  | 2.53 | 2 | 241-266(2.53) 276-304(0.71)                                                                                 |
| gnl UG Hs#S15846864 | 0.89 | 1 | 1021-1047(0.89)                                                                                             |
| gnl UG Hs#S2293453  | 1.39 | 1 | 1202-1227(1.39)                                                                                             |
| gnl UG Hs#S1569524  | 0.88 | 1 | 2006-2031(0.88)                                                                                             |
| gnl UG Hs#S3973025  | 2.27 | 1 | 223-249(2.27)                                                                                               |
| gnl UG Hs#S4284780  | 2.11 | 1 | 44-69(2.11)                                                                                                 |
| gnl UG Hs#S3438543  | 1.5  | 2 | 349-374(0.34) 443-468(1.50)                                                                                 |
| gnl UG Hs#S1569484  | 2.1  | 5 | 1190-1215(2.10) 1406-1431(0.04) 2900-2928(1.39) 2979-3006(0.55) 3209-3235(1.03)                             |
| gnl UG Hs#S1730206  | 4.39 | 6 | 248-273(1.85) 385-410(0.99) 1584-1612(0.52) 1794-1819(4.39) 2478-2506(1.69) 3427-3452(0.85)                 |
| gnl UG Hs#S3542666  | 0.13 | 1 | 957-987(0.13)                                                                                               |
| gnl UG Hs#S4822062  | 3.4  | 5 | 1003-1031(3.40) 1658-1683(0.81) 1720-1746(1.36) 1858-1886(1.21) 2025-2049(1.26)                             |
| gnl UG Hs#S1731482  | 1.72 | 2 | 437-462(1.72) 487-513(0.40)                                                                                 |
| gnl UG Hs#S2293371  | 3.39 | 4 | 298-323(3.39) 884-909(0.26) 1084-1107(1.14) 1251-1276(1.72)                                                 |
| gnl UG Hs#S5978466  | 3.97 | 3 | 768-796(0.06) 1639-1664(0.17) 1838-1863(3.97)                                                               |
| gnl UG Hs#S3218996  | 1.26 | 1 | 45-71(1.26)                                                                                                 |
| gnl UG Hs#S1731087  | 0.65 | 1 | 1059-1085(0.65)                                                                                             |
| gnl UG Hs#S2140203  | 0.72 | 1 | 518-543(0.72)                                                                                               |
| gnl UG Hs#S4820113  | 6.79 | 1 | 385-410(6.79)                                                                                               |
| gnl UG Hs#S14802391 | 1.06 | 3 | 174-202(0.56) 1213-1238(0.04) 1299-1326(1.06)                                                               |
| gnl UG Hs#S15631488 | 0.71 | 1 | 271-297(0.71)                                                                                               |
| gnl UG Hs#S1732396  | 0.76 | 1 | 334-360(0.76)                                                                                               |
| gnl UG Hs#S1824353  | 0.65 | 1 | 379-404(0.65)                                                                                               |
| gnl UG Hs#S1727167  | 1.4  | 3 | 9-33(0.87) 141-169(1.40) 312-339(0.26)                                                                      |
| gnl UG Hs#S6091935  | 0.89 | 1 | 82-109(0.89)                                                                                                |
| gnl UG Hs#S1972978  | 0.5  | 1 | 1137-1163(0.50)                                                                                             |
| gnl UG Hs#S1731634  | 0.99 | 1 | 35-61(0.99)                                                                                                 |
| gnl UG Hs#S15642205 | 0.08 | 1 | 122-150(0.08)                                                                                               |
| gnl UG Hs#S3602306  | 0.08 | 1 | 336-362(0.08)                                                                                               |
| gnl UG Hs#S3993835  | 0.66 | 2 | 180-206(0.27) 344-369(0.66)                                                                                 |
| gnl UG Hs#S3438947  | 3.1  | 1 | 789-813(3.10)                                                                                               |
| gnl UG Hs#S3219675  | 3.03 | 1 | 16-42(3.03)                                                                                                 |
| gnl UG Hs#S15636883 | 2.21 | 1 | 265-293(2.21)                                                                                               |
| gnl UG Hs#S2293618  | 0.08 | 1 | 367-392(0.08)                                                                                               |

|                     |      |                                                                                                                                                                                                |
|---------------------|------|------------------------------------------------------------------------------------------------------------------------------------------------------------------------------------------------|
| gnl UG Hs#S1730834  | 5.67 | 1 37-63(5.67)                                                                                                                                                                                  |
| gnl UG Hs#S1727616  | 1.53 | 6 388-416(1.08) 601-626(1.53) 699-722(0.52) 907-934(0.85) 1444-1469(0.43) 1774-1799(0.52)                                                                                                      |
| gnl UG Hs#S2294289  | 2.5  | 1 92-118(2.50)                                                                                                                                                                                 |
| gnl UG Hs#S2139385  | 1    | 3 809-835(0.30) 848-873(0.11) 2117-2142(1.00)                                                                                                                                                  |
| gnl UG Hs#S3438772  | 8.05 | 1 334-360(8.05)                                                                                                                                                                                |
| gnl UG Hs#S10831764 | 0.98 | 1 465-490(0.98)                                                                                                                                                                                |
| gnl UG Hs#S2294478  | 3.26 | 3 32-57(3.26) 299-324(1.03) 434-459(2.53)                                                                                                                                                      |
| gnl UG Hs#S7111620  | 3.63 | 12 212-237(3.63) 382-416(1.10) 1015-1039(1.75) 2046-2071(0.65) 2160-2186(2.40) 2356-2385(0.66) 2545-2571(2.72) 2611-2636(0.17) 2710-2735(0.74) 3304-3332(0.56) 3741-3766(0.43) 3787-3812(0.43) |
| gnl UG Hs#S1727177  | 3.94 | 1 315-340(3.94)                                                                                                                                                                                |
| gnl UG Hs#S4807613  | 0.55 | 1 100-127(0.55)                                                                                                                                                                                |
| gnl UG Hs#S15631732 | 1.92 | 1 122-149(1.92)                                                                                                                                                                                |
| gnl UG Hs#S1731439  | 0.52 | 1 131-157(0.52)                                                                                                                                                                                |
| gnl UG Hs#S3219645  | 5.5  | 5 1-30(0.98) 68-93(4.43) 133-157(1.00) 224-250(2.18) 276-302(5.50)                                                                                                                             |
| gnl UG Hs#S1730448  | 4.62 | 1 675-700(4.62)                                                                                                                                                                                |
| gnl UG Hs#S1731539  | 0.72 | 2 192-217(0.72) 704-732(0.30)                                                                                                                                                                  |
| gnl UG Hs#S1729271  | 4.72 | 2 110-138(4.72) 699-724(1.35)                                                                                                                                                                  |
| gnl UG Hs#S226194   | 2.63 | 3 354-377(0.82) 530-555(2.63) 562-585(1.54)                                                                                                                                                    |
| gnl UG Hs#S5978527  | 1.2  | 1 1438-1464(1.20)                                                                                                                                                                              |
| gnl UG Hs#S3547257  | 1.17 | 1 844-869(1.17)                                                                                                                                                                                |
| gnl UG Hs#S2139934  | 1.67 | 7 513-538(0.26) 966-991(0.46) 1010-1036(1.01) 1052-1078(0.75) 1395-1420(1.48) 1512-1535(1.67) 2071-2096(1.04)                                                                                  |
| gnl UG Hs#S1730693  | 0.65 | 1 217-242(0.65)                                                                                                                                                                                |
| gnl UG Hs#S11046583 | 5.04 | 1 249-274(5.04)                                                                                                                                                                                |
| gnl UG Hs#S7110110  | 3.52 | 5 414-437(1.08) 908-936(2.23) 999-1024(3.52) 1385-1413(0.98) 1575-1601(2.72)                                                                                                                   |
| gnl UG Hs#S1728367  | 2.89 | 6 571-596(1.98) 754-780(2.89) 2461-2486(0.32) 2500-2525(1.85) 2561-2588(0.21) 3078-3103(0.45)                                                                                                  |
| gnl UG Hs#S1728442  | 1.99 | 4 385-410(1.79) 944-969(0.98) 1361-1386(1.08) 1702-1726(1.99)                                                                                                                                  |
| gnl UG Hs#S1730727  | 4.36 | 1 1598-1626(4.36)                                                                                                                                                                              |
| gnl UG Hs#S1730104  | 0.17 | 1 318-344(0.17)                                                                                                                                                                                |
| gnl UG Hs#S2139507  | 1.3  | 3 199-224(1.28) 653-678(0.97) 703-728(1.30)                                                                                                                                                    |
| gnl UG Hs#S1730518  | 0.74 | 1 760-788(0.74)                                                                                                                                                                                |
| gnl UG Hs#S2139631  | 1.69 | 3 544-569(1.69) 592-618(0.66) 1103-1128(1.23)                                                                                                                                                  |
| gnl UG Hs#S6158967  | 3.9  | 4 414-439(3.90) 441-469(2.05) 1855-1881(1.53) 2032-2058(0.23)                                                                                                                                  |
| gnl UG Hs#S2139028  | 0.63 | 1 232-257(0.63)                                                                                                                                                                                |
| gnl UG Hs#S5930827  | 0.3  | 1 301-327(0.30)                                                                                                                                                                                |
| gnl UG Hs#S3219627  | 1.17 | 2 133-158(0.46) 169-194(1.17)                                                                                                                                                                  |
| gnl UG Hs#S5978498  | 3.4  | 3 1366-1391(0.36) 1886-1911(3.40) 1965-1993(1.08)                                                                                                                                              |
| gnl UG Hs#S3601759  | 1.34 | 1 237-262(1.34)                                                                                                                                                                                |
| gnl UG Hs#S14863730 | 1.16 | 4 95-120(1.16) 215-240(0.57) 298-323(0.40) 891-917(0.71)                                                                                                                                       |
| gnl UG Hs#S2139325  | 3.7  | 5 636-662(0.26) 782-811(0.11) 845-870(3.70) 1682-1707(0.65) 1907-1932(2.53)                                                                                                                    |
| gnl UG Hs#S1730053  | 1.72 | 3 579-605(0.72) 648-676(0.14) 1176-1201(1.72)                                                                                                                                                  |
| gnl UG Hs#S1727064  | 0.72 | 3 303-328(0.72) 590-615(0.07) 1035-1060(0.46)                                                                                                                                                  |
| gnl UG Hs#S3817892  | 1.75 | 1 1216-1242(1.75)                                                                                                                                                                              |
| gnl UG Hs#S4046196  | 2.17 | 2 304-330(0.56) 462-488(2.17)                                                                                                                                                                  |
| gnl UG Hs#S4554324  | 3.53 | 9 898-925(0.01) 968-996(1.66) 1001-1025(2.26) 1350-1377(0.62) 1418-1445(0.43) 1562-1588(0.98) 1632-1659(3.53) 1718-1744(0.50) 1765-1791(0.02)                                                  |
| gnl UG Hs#S1728236  | 0.56 | 1 666-692(0.56)                                                                                                                                                                                |
| gnl UG Hs#S4613953  | 0.82 | 1 115-142(0.82)                                                                                                                                                                                |
| gnl UG Hs#S3991912  | 2.04 | 1 1838-1863(2.04)                                                                                                                                                                              |
| gnl UG Hs#S1730530  | 0.87 | 2 179-204(0.87) 702-728(0.40)                                                                                                                                                                  |
| gnl UG Hs#S1729967  | 1.1  | 1 359-382(1.10)                                                                                                                                                                                |
| gnl UG Hs#S2139624  | 0.94 | 3 1285-1311(0.94) 1920-1945(0.20) 1946-1971(0.20)                                                                                                                                              |
| gnl UG Hs#S2293901  | 1.52 | 4 1083-1108(0.98) 1265-1293(1.52) 1741-1768(0.71) 2036-2061(0.55)                                                                                                                              |
| gnl UG Hs#S3322146  | 0.23 | 1 574-599(0.23)                                                                                                                                                                                |
| gnl UG Hs#S11046667 | 1.83 | 4 1147-1173(0.10) 2006-2031(0.58) 2037-2063(1.83) 2523-2549(0.34)                                                                                                                              |
| gnl UG Hs#S5860360  | 1.94 | 3 71-96(1.94) 426-451(0.04) 598-624(1.33)                                                                                                                                                      |
| gnl UG Hs#S1726299  | 0.58 | 1 274-302(0.58)                                                                                                                                                                                |

|                     |      |    |                                                                                                                                                           |
|---------------------|------|----|-----------------------------------------------------------------------------------------------------------------------------------------------------------|
| gnl UG Hs#S14802432 | 0.14 | 1  | 1093-1118(0.14)                                                                                                                                           |
| gnl UG Hs#S1731591  | 1.11 | 2  | 239-264(1.11) 490-515(0.30)                                                                                                                               |
| gnl UG Hs#S14802373 | 2.17 | 3  | 220-246(2.17) 640-666(1.62) 1271-1296(0.13)                                                                                                               |
| gnl UG Hs#S1730250  | 0.92 | 2  | 108-131(0.92) 796-821(0.89)                                                                                                                               |
| gnl UG Hs#S5978468  | 0.98 | 3  | 493-518(0.78) 651-677(0.98) 739-764(0.30)                                                                                                                 |
| gnl UG Hs#S1727934  | 1.57 | 1  | 354-379(1.57)                                                                                                                                             |
| gnl UG Hs#S5495079  | 1.23 | 1  | 454-480(1.23)                                                                                                                                             |
| gnl UG Hs#S4817160  | 0.65 | 2  | 2160-2185(0.65) 2209-2235(0.28)                                                                                                                           |
| gnl UG Hs#S3619228  | 1.81 | 1  | 2319-2347(1.81)                                                                                                                                           |
| gnl UG Hs#S1731819  | 1.44 | 2  | 352-380(1.44) 1079-1104(0.33)                                                                                                                             |
| gnl UG Hs#S4820763  | 1.98 | 3  | 15-42(0.07) 278-303(0.98) 417-444(1.98)                                                                                                                   |
| gnl UG Hs#S10832225 | 0.66 | 3  | 1339-1364(0.66) 1728-1753(0.08) 1771-1796(0.33)                                                                                                           |
| gnl UG Hs#S1731082  | 1.11 | 2  | 161-187(0.40) 438-464(1.11)                                                                                                                               |
| gnl UG Hs#S3803436  | 1.3  | 1  | 291-314(1.30)                                                                                                                                             |
| gnl UG Hs#S1731794  | 2.18 | 2  | 334-360(1.25) 531-559(2.18)                                                                                                                               |
| gnl UG Hs#S1726563  | 0.55 | 2  | 614-639(0.20) 906-930(0.55)                                                                                                                               |
| gnl UG Hs#S7111404  | 1.68 | 1  | 466-492(1.68)                                                                                                                                             |
| gnl UG Hs#S1729789  | 1.07 | 1  | 18-46(1.07)                                                                                                                                               |
| gnl UG Hs#S5495036  | 0.27 | 1  | 56-83(0.27)                                                                                                                                               |
| gnl UG Hs#S10831598 | 0.5  | 1  | 1139-1164(0.50)                                                                                                                                           |
| gnl UG Hs#S1727495  | 2.76 | 2  | 262-287(1.89) 363-388(2.76)                                                                                                                               |
| gnl UG Hs#S1971500  | 1.72 | 3  | 1037-1062(0.98) 1396-1422(1.72) 1555-1578(0.95)                                                                                                           |
| gnl UG Hs#S1824346  | 0.4  | 1  | 1217-1242(0.40)                                                                                                                                           |
| gnl UG Hs#S4614610  | 3.13 | 6  | 420-446(2.40) 460-486(1.08) 572-597(3.13) 729-756(0.65) 1407-1432(2.84) 1635-1660(0.04)                                                                   |
| gnl UG Hs#S4807942  | 0.23 | 2  | 195-222(0.07) 1046-1072(0.23)                                                                                                                             |
| gnl UG Hs#S1727072  | 0.08 | 1  | 1683-1709(0.08)                                                                                                                                           |
| gnl UG Hs#S3219297  | 0.43 | 1  | 1869-1894(0.43)                                                                                                                                           |
| gnl UG Hs#S2139136  | 0.11 | 1  | 64-89(0.11)                                                                                                                                               |
| gnl UG Hs#S2140618  | 0.82 | 2  | 105-131(0.82) 139-165(0.44)                                                                                                                               |
| gnl UG Hs#S15631530 | 1.49 | 2  | 335-362(1.49) 408-434(0.34)                                                                                                                               |
| gnl UG Hs#S2140014  | 2.36 | 1  | 43-68(2.36)                                                                                                                                               |
| gnl UG Hs#S2293447  | 4.01 | 3  | 41-68(4.01) 610-633(0.49) 896-922(1.58)                                                                                                                   |
| gnl UG Hs#S1726820  | 0.33 | 3  | 557-583(0.23) 1194-1219(0.26) 1900-1925(0.33)                                                                                                             |
| gnl UG Hs#S3438811  | 3.3  | 5  | 212-237(0.69) 241-267(0.11) 1115-1140(0.88) 1403-1428(3.30) 1511-1536(0.23)                                                                               |
| gnl UG Hs#S2139517  | 2.23 | 1  | 3628-3654(2.23)                                                                                                                                           |
| gnl UG Hs#S1732162  | 1.23 | 1  | 1019-1044(1.23)                                                                                                                                           |
| gnl UG Hs#S1729558  | 2.95 | 4  | 410-436(2.95) 812-837(1.50) 862-889(1.04) 1125-1150(1.46)                                                                                                 |
| gnl UG Hs#S14802057 | 1.98 | 3  | 334-359(0.36) 1013-1038(1.98) 1456-1482(1.82)                                                                                                             |
| gnl UG Hs#S1727117  | 4.72 | 2  | 83-109(2.34) 170-196(4.72)                                                                                                                                |
| gnl UG Hs#S4825089  | 1.76 | 3  | 601-626(1.32) 867-892(1.76) 1969-1993(1.19)                                                                                                               |
| gnl UG Hs#S6163431  | 1.4  | 2  | 2363-2387(0.08) 3115-3140(1.40)                                                                                                                           |
| gnl UG Hs#S2293890  | 1.79 | 1  | 127-152(1.79)                                                                                                                                             |
| gnl UG Hs#S2293596  | 2.98 | 6  | 104-131(2.24) 181-206(1.13) 331-357(1.43) 365-389(2.30) 493-518(2.98) 678-706(2.30)                                                                       |
| gnl UG Hs#S3220046  | 1.25 | 3  | 288-313(0.87) 1522-1547(1.25) 2002-2027(0.26)                                                                                                             |
| gnl UG Hs#S10817743 | 4.62 | 6  | 302-328(0.56) 430-456(0.34) 895-920(4.62) 933-959(2.43) 976-1002(4.14) 1195-1219(1.51)                                                                    |
| gnl UG Hs#S2139266  | 2.07 | 10 | 520-548(0.02) 643-668(1.58) 842-865(2.07) 1009-1037(1.35) 1674-1699(0.72) 1710-1735(0.20) 2577-2605(0.75) 2649-2673(0.13) 2711-2737(1.98) 3095-3120(1.57) |
| gnl UG Hs#S3438683  | 0.01 | 1  | 841-866(0.01)                                                                                                                                             |
| gnl UG Hs#S1971629  | 1.12 | 4  | 594-619(0.56) 2596-2624(1.00) 3067-3091(1.12) 3340-3366(0.40)                                                                                             |
| gnl UG Hs#S2293646  | 1.94 | 5  | 192-219(0.04) 453-481(1.33) 910-937(1.94) 1221-1248(0.61) 1304-1333(0.68)                                                                                 |
| gnl UG Hs#S2139272  | 1.24 | 2  | 485-510(1.24) 511-536(1.17)                                                                                                                               |
| gnl UG Hs#S1729500  | 0.98 | 1  | 360-385(0.98)                                                                                                                                             |
| gnl UG Hs#S3601499  | 0.91 | 1  | 411-436(0.91)                                                                                                                                             |
| gnl UG Hs#S1729505  | 0.13 | 1  | 82-107(0.13)                                                                                                                                              |
| gnl UG Hs#S1728514  | 2.82 | 2  | 317-344(0.40) 383-408(2.82)                                                                                                                               |

|                     |      |    |                                                                                                                                                                                           |
|---------------------|------|----|-------------------------------------------------------------------------------------------------------------------------------------------------------------------------------------------|
| gnl UG Hs#S7111908  | 2.71 | 1  | 299-324(2.71)                                                                                                                                                                             |
| gnl UG Hs#S4807600  | 2.72 | 1  | 436-461(2.72)                                                                                                                                                                             |
| gnl UG Hs#S1729065  | 2.89 | 1  | 534-559(2.89)                                                                                                                                                                             |
| gnl UG Hs#S10831805 | 4.53 | 1  | 445-470(4.53)                                                                                                                                                                             |
| gnl UG Hs#S5860327  | 4.04 | 13 | 196-221(2.72) 366-391(2.30) 399-425(0.84) 600-625(0.20) 656-681(1.46) 1254-1281(0.88) 2394-2419(4.04) 2685-2710(0.46) 2739-2764(0.26) 3184-3209(0.30) 3215-3243(0.07) 3451-3481(0.97) 401 |
| gnl UG Hs#S14273252 | 3.4  | 4  | 159-185(1.23) 536-562(0.33) 764-791(1.46) 1372-1398(3.40)                                                                                                                                 |
| gnl UG Hs#S15637923 | 0.62 | 1  | 52-80(0.62)                                                                                                                                                                               |
| gnl UG Hs#S3438838  | 3.4  | 2  | 189-215(2.04) 250-278(3.40)                                                                                                                                                               |
| gnl UG Hs#S2294655  | 1.4  | 5  | 233-257(1.40) 354-379(0.53) 859-884(0.63) 1158-1182(0.30) 1438-1464(1.21)                                                                                                                 |
| gnl UG Hs#S3602307  | 0.11 | 1  | 178-203(0.11)                                                                                                                                                                             |
| gnl UG Hs#S2294627  | 1.55 | 5  | 255-283(1.55) 573-599(1.27) 1006-1031(1.40) 1091-1118(0.72) 1183-1211(0.04)                                                                                                               |
| gnl UG Hs#S2139397  | 3.49 | 2  | 1091-1116(2.48) 1278-1304(3.49)                                                                                                                                                           |
| gnl UG Hs#S3322397  | 0.91 | 1  | 1104-1130(0.91)                                                                                                                                                                           |
| gnl UG Hs#S15640387 | 4.75 | 3  | 120-147(3.47) 629-654(4.75) 880-905(1.48)                                                                                                                                                 |
| gnl UG Hs#S2139160  | 3.27 | 3  | 78-103(0.04) 123-146(3.27) 233-258(2.49)                                                                                                                                                  |
| gnl UG Hs#S1732223  | 0.43 | 1  | 78-104(0.43)                                                                                                                                                                              |
| gnl UG Hs#S3438771  | 2.33 | 1  | 1456-1481(2.33)                                                                                                                                                                           |
| gnl UG Hs#S15634544 | 3.14 | 3  | 524-549(3.14) 1150-1175(0.43) 1745-1770(0.65)                                                                                                                                             |
| gnl UG Hs#S3437921  | 0.76 | 1  | 113-139(0.76)                                                                                                                                                                             |
| gnl UG Hs#S1727963  | 3.08 | 1  | 73-98(3.08)                                                                                                                                                                               |
| gnl UG Hs#S2293994  | 2.04 | 2  | 389-414(0.72) 447-472(2.04)                                                                                                                                                               |
| gnl UG Hs#S3439814  | 1.36 | 1  | 1132-1156(1.36)                                                                                                                                                                           |
| gnl UG Hs#S4836163  | 2.4  | 5  | 891-916(1.44) 1007-1033(0.60) 1162-1188(1.62) 1344-1369(0.37) 1385-1410(2.40)                                                                                                             |
| gnl UG Hs#S5495005  | 4.53 | 5  | 517-543(1.50) 735-760(1.62) 780-805(0.53) 829-855(0.08) 1133-1158(4.53)                                                                                                                   |
| gnl UG Hs#S1824520  | 0.88 | 2  | 477-502(0.14) 524-549(0.88)                                                                                                                                                               |
| gnl UG Hs#S4813741  | 3.04 | 6  | 1899-1924(1.72) 2166-2192(0.91) 3054-3079(0.30) 3164-3188(3.04) 3579-3604(0.68) 3778-3803(0.59)                                                                                           |
| gnl UG Hs#S4284776  | 2.39 | 2  | 650-675(2.39) 955-978(0.14)                                                                                                                                                               |
| gnl UG Hs#S14802292 | 0.75 | 1  | 149-174(0.75)                                                                                                                                                                             |
| gnl UG Hs#S3219270  | 1.49 | 2  | 238-266(1.49) 378-403(0.03)                                                                                                                                                               |
| gnl UG Hs#S1973938  | 2.72 | 5  | 23-48(2.46) 411-437(2.65) 714-739(0.07) 931-957(2.33) 1812-1837(2.72)                                                                                                                     |
| gnl UG Hs#S3438965  | 1.04 | 1  | 295-321(1.04)                                                                                                                                                                             |
| gnl UG Hs#S2140218  | 1.23 | 2  | 285-311(1.23) 892-918(0.55)                                                                                                                                                               |
| gnl UG Hs#S4824796  | 1.71 | 1  | 262-290(1.71)                                                                                                                                                                             |
| gnl UG Hs#S1726750  | 2.26 | 1  | 1057-1082(2.26)                                                                                                                                                                           |
| gnl UG Hs#S1729174  | 3.67 | 3  | 628-653(0.55) 856-882(3.67) 973-996(2.66)                                                                                                                                                 |
| gnl UG Hs#S1730319  | 0.65 | 1  | 89-114(0.65)                                                                                                                                                                              |
| gnl UG Hs#S2293320  | 1.04 | 1  | 1163-1188(1.04)                                                                                                                                                                           |
| gnl UG Hs#S15632761 | 1.75 | 2  | 47-72(0.43) 960-986(1.75)                                                                                                                                                                 |
| gnl UG Hs#S1729736  | 5.92 | 10 | 318-344(0.30) 473-498(0.24) 590-618(0.04) 747-772(4.39) 919-944(0.15) 1281-1306(1.50) 1858-1884(5.92) 2004-2030(1.08) 2062-2090(2.33) 2229-2254(1.40)                                     |
| gnl UG Hs#S4823029  | 5.72 | 2  | 2731-2756(5.72) 3389-3414(1.20)                                                                                                                                                           |
| gnl UG Hs#S1731338  | 0.74 | 1  | 107-132(0.74)                                                                                                                                                                             |
| gnl UG Hs#S3355509  | 0.17 | 1  | 96-125(0.17)                                                                                                                                                                              |
| gnl UG Hs#S11154010 | 1.65 | 2  | 182-207(0.92) 1708-1735(1.65)                                                                                                                                                             |
| gnl UG Hs#S1731878  | 3.87 | 1  | 784-809(3.87)                                                                                                                                                                             |
| gnl UG Hs#S1731585  | 2.37 | 4  | 332-355(1.03) 649-674(1.50) 1127-1152(2.37) 1634-1659(2.26)                                                                                                                               |
| gnl UG Hs#S1727579  | 1.76 | 1  | 170-196(1.76)                                                                                                                                                                             |
| gnl UG Hs#S1730125  | 3.67 | 4  | 953-979(3.67) 1027-1053(0.94) 1695-1720(0.07) 1903-1929(0.40)                                                                                                                             |
| gnl UG Hs#S2293728  | 1.3  | 2  | 253-278(1.30) 517-542(0.30)                                                                                                                                                               |
| gnl UG Hs#S4044987  | 0.81 | 1  | 724-752(0.81)                                                                                                                                                                             |
| gnl UG Hs#S4817692  | 2.52 | 1  | 7-32(2.52)                                                                                                                                                                                |
| gnl UG Hs#S14272923 | 3.8  | 3  | 211-236(3.80) 353-378(1.05) 832-857(0.84)                                                                                                                                                 |
| gnl UG Hs#S3543453  | 5.43 | 1  | 67-92(5.43)                                                                                                                                                                               |
| gnl UG Hs#S3219873  | 1.39 | 1  | 195-220(1.39)                                                                                                                                                                             |
| gnl UG Hs#S4829488  | 3.3  | 6  | 2112-2137(3.30) 2376-2401(1.04) 2630-2655(1.37) 2802-2829(0.35) 2986-3011(0.14) 3050-3073(2.69)                                                                                           |

|                    |       |                                                                                                                                                                                             |
|--------------------|-------|---------------------------------------------------------------------------------------------------------------------------------------------------------------------------------------------|
| gnl UG Hs#S2140699 | 0.34  | 1 305-331(0.34)                                                                                                                                                                             |
| gnl UG Hs#S4554047 | 1.81  | 1 419-444(1.81)                                                                                                                                                                             |
| gnl UG Hs#S2293887 | 2.6   | 5 621-646(0.26) 848-874(2.60) 897-922(0.14) 1318-1344(2.50) 1442-1467(0.07)                                                                                                                 |
| gnl UG Hs#S2139502 | 3.97  | 5 35-60(3.97) 188-217(0.81) 456-479(2.62) 1163-1188(1.98) 2975-3003(0.17)                                                                                                                   |
| gnl UG Hs#S3219259 | 2.04  | 1 269-294(2.04)                                                                                                                                                                             |
| gnl UG Hs#S3439021 | 0.14  | 1 311-336(0.14)                                                                                                                                                                             |
| gnl UG Hs#S1727253 | 1.94  | 2 242-270(1.94) 282-311(0.34)                                                                                                                                                               |
| gnl UG Hs#S5930951 | 0.62  | 1 626-651(0.62)                                                                                                                                                                             |
| gnl UG Hs#S1728059 | 1.56  | 1 332-357(1.56)                                                                                                                                                                             |
| gnl UG Hs#S3987304 | 0.23  | 1 279-304(0.23)                                                                                                                                                                             |
| gnl UG Hs#S1729624 | 0.43  | 1 242-268(0.43)                                                                                                                                                                             |
| gnl UG Hs#S2294357 | 1.48  | 1 167-192(1.48)                                                                                                                                                                             |
| gnl UG Hs#S1731934 | 0.69  | 1 539-567(0.69)                                                                                                                                                                             |
| gnl UG Hs#S3323065 | 3.92  | 3 319-347(2.40) 1113-1139(3.92) 1600-1626(0.76)                                                                                                                                             |
| gnl UG Hs#S3905489 | 2.4   | 2 9-34(1.65) 1782-1810(2.40)                                                                                                                                                                |
| gnl UG Hs#S5978475 | 3.25  | 1 801-826(3.25)                                                                                                                                                                             |
| gnl UG Hs#S3219914 | 4.07  | 1 854-880(4.07)                                                                                                                                                                             |
| gnl UG Hs#S3987163 | 2.52  | 3 680-705(2.52) 1049-1074(1.82) 1125-1150(0.59)                                                                                                                                             |
| gnl UG Hs#S3826009 | 0.07  | 1 713-741(0.07)                                                                                                                                                                             |
| gnl UG Hs#S1728192 | 2.04  | 4 78-101(0.20) 162-188(2.04) 336-361(0.14) 1691-1716(1.17)                                                                                                                                  |
| gnl UG Hs#S1730969 | 0.74  | 2 38-65(0.74) 326-354(0.30)                                                                                                                                                                 |
| gnl UG Hs#S2140280 | 1.08  | 2 306-331(0.88) 500-526(1.08)                                                                                                                                                               |
| gnl UG Hs#S1729281 | 0.3   | 1 538-563(0.30)                                                                                                                                                                             |
| gnl UG Hs#S1729376 | 3.4   | 3 28-53(1.65) 116-144(3.40) 160-186(0.76)                                                                                                                                                   |
| gnl UG Hs#S2140027 | 1.07  | 2 201-228(1.07) 361-389(0.38)                                                                                                                                                               |
| gnl UG Hs#S4622311 | 3.9   | 3 517-541(0.40) 2125-2150(3.90) 3398-3423(1.40)                                                                                                                                             |
| gnl UG Hs#S4044692 | 0.49  | 1 554-582(0.49)                                                                                                                                                                             |
| gnl UG Hs#S1729031 | 2.88  | 3 130-155(1.62) 280-305(0.54) 355-383(2.88)                                                                                                                                                 |
| gnl UG Hs#S3973129 | 2.3   | 3 1328-1354(2.30) 1380-1405(1.16) 1644-1669(2.04)                                                                                                                                           |
| gnl UG Hs#S4807530 | 1.97  | 1 115-138(1.97)                                                                                                                                                                             |
| gnl UG Hs#S3220039 | 3.34  | 3 412-438(3.34) 524-548(1.79) 698-721(0.62)                                                                                                                                                 |
| gnl UG Hs#S2139489 | 0.23  | 1 1962-1987(0.23)                                                                                                                                                                           |
| gnl UG Hs#S3220201 | 0.23  | 1 1500-1525(0.23)                                                                                                                                                                           |
| gnl UG Hs#S2139341 | 0.74  | 1 2397-2422(0.74)                                                                                                                                                                           |
| gnl UG Hs#S2293992 | 0.2   | 1 177-202(0.20)                                                                                                                                                                             |
| gnl UG Hs#S1727239 | 0.98  | 5 816-841(0.39) 972-1000(0.35) 1161-1189(0.94) 1232-1257(0.39) 1500-1526(0.98)                                                                                                              |
| gnl UG Hs#S2139471 | 2.57  | 1 1627-1652(2.57)                                                                                                                                                                           |
| gnl UG Hs#S2139119 | 1.08  | 2 516-542(0.88) 1124-1150(1.08)                                                                                                                                                             |
| gnl UG Hs#S1730802 | 10.28 | 9 544-570(0.18) 937-962(1.53) 1056-1081(0.74) 1644-1669(0.20) 2154-2179(10.28) 2218-2246(1.83) 2287-2312(0.30) 3044-3067(1.04) 3133-3158(0.40)                                              |
| gnl UG Hs#S3219540 | 0.5   | 1 52-78(0.50)                                                                                                                                                                               |
| gnl UG Hs#S1728958 | 1.07  | 1 229-257(1.07)                                                                                                                                                                             |
| gnl UG Hs#S5931219 | 0.88  | 3 255-282(0.88) 312-336(0.26) 908-934(0.09)                                                                                                                                                 |
| gnl UG Hs#S7112873 | 3.3   | 16 84-110(1.50) 187-215(3.30) 315-340(1.30) 1211-1237(1.18) 1640-1665(0.07) 1765-1790(0.46) 1837-1865(0.58) 1870-1896(0.01) 1930-1955(2.26) 2033-2059(0.69) 2061-2086(2.72) 2164-2189(0.58) |
| gnl UG Hs#S4810939 | 1.46  | 2 340-365(1.46) 1054-1079(0.33)                                                                                                                                                             |
| gnl UG Hs#S5978510 | 2.17  | 5 669-697(2.17) 1330-1358(0.81) 1395-1420(1.63) 1726-1751(0.48) 2458-2484(0.91)                                                                                                             |
| gnl UG Hs#S2293162 | 1.29  | 1 425-450(1.29)                                                                                                                                                                             |
| gnl UG Hs#S3601546 | 2.85  | 5 136-161(2.85) 245-271(1.72) 538-563(1.15) 622-647(0.34) 916-944(0.81)                                                                                                                     |
| gnl UG Hs#S4823798 | 1.82  | 1 1719-1744(1.82)                                                                                                                                                                           |
| gnl UG Hs#S1824523 | 0.04  | 1 435-460(0.04)                                                                                                                                                                             |
| gnl UG Hs#S4435157 | 4.1   | 4 1169-1195(0.23) 1550-1576(3.91) 1812-1837(0.68) 1873-1901(4.10)                                                                                                                           |
| gnl UG Hs#S4545823 | 3.47  | 6 72-97(1.13) 465-490(3.46) 499-527(3.47) 626-654(3.03) 728-753(0.89) 765-790(0.34)                                                                                                         |
| gnl UG Hs#S3973077 | 3.4   | 2 54-80(3.40) 98-123(0.14)                                                                                                                                                                  |
| gnl UG Hs#S1726446 | 2.67  | 2 911-937(1.40) 1037-1062(2.67)                                                                                                                                                             |
| gnl UG Hs#S4819922 | 2.72  | 5 538-563(0.23) 1419-1446(2.72) 1524-1550(1.82) 1959-1984(0.74) 2536-2562(0.62)                                                                                                             |



|                     |      |   |                                                                                                                             |
|---------------------|------|---|-----------------------------------------------------------------------------------------------------------------------------|
| gnl UG Hs#S14802379 | 1.91 | 1 | 165-193(1.91)                                                                                                               |
| gnl UG Hs#S1730494  | 1.94 | 7 | 949-974(0.43) 1201-1226(0.17) 1253-1278(1.91) 1444-1470(1.26) 1972-1997(0.20) 2856-2879(0.18) 3306-3330(1.94)               |
| gnl UG Hs#S1726699  | 1.33 | 1 | 810-835(1.33)                                                                                                               |
| gnl UG Hs#S3438655  | 0.2  | 1 | 496-521(0.20)                                                                                                               |
| gnl UG Hs#S1729961  | 2.07 | 2 | 1007-1033(1.82) 1648-1673(2.07)                                                                                             |
| gnl UG Hs#S1729341  | 0.46 | 1 | 787-812(0.46)                                                                                                               |
| gnl UG Hs#S3438622  | 0.95 | 1 | 1411-1434(0.95)                                                                                                             |
| gnl UG Hs#S1728155  | 1.58 | 2 | 115-140(1.14) 147-175(1.58)                                                                                                 |
| gnl UG Hs#S5978568  | 2.72 | 6 | 237-262(0.50) 581-611(0.13) 829-855(2.72) 976-1001(0.98) 1238-1261(0.95) 1329-1355(0.62)                                    |
| gnl UG Hs#S1727959  | 3.46 | 2 | 55-80(0.46) 708-733(3.46)                                                                                                   |
| gnl UG Hs#S4396131  | 0.75 | 5 | 81-106(0.72) 1151-1176(0.75) 1631-1657(0.15) 1682-1708(0.64) 1712-1736(0.04)                                                |
| gnl UG Hs#S2139593  | 2.94 | 8 | 532-560(0.59) 972-997(0.22) 1146-1171(1.40) 1202-1228(2.52) 1306-1333(0.86) 1909-1934(1.30) 1955-1981(0.26) 2308-2333(2.94) |
| gnl UG Hs#S14802301 | 0.69 | 1 | 440-466(0.69)                                                                                                               |
| gnl UG Hs#S3219501  | 3.3  | 2 | 232-257(1.89) 347-373(3.30)                                                                                                 |
| gnl UG Hs#S3219135  | 3.71 | 1 | 200-225(3.71)                                                                                                               |
| gnl UG Hs#S2294376  | 1.91 | 1 | 57-82(1.91)                                                                                                                 |
| gnl UG Hs#S1731926  | 0.62 | 2 | 398-426(0.20) 924-949(0.62)                                                                                                 |
| gnl UG Hs#S1728311  | 0.5  | 1 | 250-275(0.50)                                                                                                               |
| gnl UG Hs#S3603866  | 2.17 | 2 | 621-646(0.72) 951-977(2.17)                                                                                                 |
| gnl UG Hs#S2139890  | 8.69 | 2 | 375-400(8.69) 690-716(1.17)                                                                                                 |
| gnl UG Hs#S4620944  | 0.23 | 1 | 1581-1607(0.23)                                                                                                             |
| gnl UG Hs#S14812636 | 2.3  | 4 | 318-344(1.60) 945-972(0.46) 1637-1662(0.79) 1677-1703(2.30)                                                                 |
| gnl UG Hs#S4621105  | 2.13 | 3 | 696-721(0.30) 848-876(2.13) 1425-1450(0.65)                                                                                 |
| gnl UG Hs#S4807738  | 1.07 | 1 | 349-374(1.07)                                                                                                               |
| gnl UG Hs#S2139832  | 3.33 | 7 | 30-55(1.72) 291-317(3.33) 490-515(0.43) 1658-1683(1.04) 1919-1942(0.97) 2020-2045(1.72) 2198-2226(1.56)                     |
| gnl UG Hs#S4545932  | 0.48 | 1 | 259-284(0.48)                                                                                                               |
| gnl UG Hs#S1726277  | 1.65 | 2 | 346-371(1.65) 2063-2088(0.58)                                                                                               |
| gnl UG Hs#S1824290  | 1.11 | 1 | 529-554(1.11)                                                                                                               |
| gnl UG Hs#S1732183  | 1.18 | 8 | 78-103(0.08) 621-646(0.13) 661-687(0.12) 732-757(0.89) 864-890(0.43) 2022-2047(0.40) 2192-2217(0.65) 2263-2288(1.18)        |
| gnl UG Hs#S4807595  | 4.11 | 7 | 101-126(4.11) 398-423(0.72) 569-595(0.69) 701-726(2.30) 1164-1190(2.08) 1567-1592(0.23) 1706-1731(0.98)                     |
| gnl UG Hs#S2139917  | 1.5  | 4 | 50-76(0.84) 215-241(1.50) 268-293(0.33) 586-609(1.50)                                                                       |
| gnl UG Hs#S1731367  | 2.85 | 2 | 874-899(2.07) 938-964(2.85)                                                                                                 |
| gnl UG Hs#S2293249  | 0.08 | 1 | 187-213(0.08)                                                                                                               |
| gnl UG Hs#S2139135  | 2.15 | 2 | 906-931(1.55) 1126-1154(2.15)                                                                                               |
| gnl UG Hs#S3219844  | 0.21 | 1 | 352-375(0.21)                                                                                                               |
| gnl UG Hs#S3880623  | 1.9  | 2 | 129-156(0.62) 1573-1597(1.90)                                                                                               |
| gnl UG Hs#S2140460  | 0.21 | 1 | 303-328(0.21)                                                                                                               |
| gnl UG Hs#S4807593  | 1.17 | 1 | 391-417(1.17)                                                                                                               |
| gnl UG Hs#S1726630  | 3.3  | 1 | 153-178(3.30)                                                                                                               |
| gnl UG Hs#S15632325 | 3.3  | 1 | 343-368(3.30)                                                                                                               |
| gnl UG Hs#S2294502  | 5.12 | 2 | 69-94(5.12) 349-375(1.68)                                                                                                   |
| gnl UG Hs#S2139486  | 2.2  | 5 | 455-481(0.01) 1251-1276(1.59) 1282-1307(0.75) 1730-1755(2.20) 2564-2592(0.08)                                               |
| gnl UG Hs#S1727566  | 5.04 | 4 | 142-168(5.04) 411-436(0.66) 814-840(1.61) 879-905(1.05)                                                                     |
| gnl UG Hs#S1727286  | 0.01 | 1 | 506-534(0.01)                                                                                                               |
| gnl UG Hs#S3602297  | 2.65 | 3 | 56-81(2.56) 764-789(2.65) 1487-1512(0.01)                                                                                   |
| gnl UG Hs#S2293908  | 1.76 | 2 | 57-81(0.14) 984-1009(1.76)                                                                                                  |
| gnl UG Hs#S4807784  | 1.46 | 1 | 163-188(1.46)                                                                                                               |
| gnl UG Hs#S15640874 | 2.69 | 2 | 718-743(2.25) 1726-1751(2.69)                                                                                               |
| gnl UG Hs#S4812715  | 3.41 | 3 | 132-156(3.41) 218-243(0.07) 516-541(0.98)                                                                                   |
| gnl UG Hs#S3220068  | 4.08 | 2 | 809-834(2.63) 1385-1411(4.08)                                                                                               |
| gnl UG Hs#S2293617  | 2.49 | 4 | 894-919(1.92) 1541-1565(1.04) 1616-1644(2.49) 1772-1797(1.01)                                                               |
| gnl UG Hs#S1727620  | 0.68 | 2 | 195-219(0.68) 534-560(0.55)                                                                                                 |
| gnl UG Hs#S15634488 | 1.13 | 2 | 260-285(1.13) 1696-1722(0.82)                                                                                               |
| gnl UG Hs#S5517759  | 3.69 | 5 | 189-214(0.36) 1256-1281(3.69) 1460-1485(0.23) 1936-1961(1.38) 2015-2040(1.84)                                               |

|                     |      |    |                                                                                                                                                                             |
|---------------------|------|----|-----------------------------------------------------------------------------------------------------------------------------------------------------------------------------|
| gnl UG Hs#S11154022 | 0.13 | 1  | 224-249(0.13)                                                                                                                                                               |
| gnl UG Hs#S7112347  | 1.79 | 1  | 540-563(1.79)                                                                                                                                                               |
| gnl UG Hs#S2293471  | 2.04 | 7  | 691-716(1.90) 1044-1069(0.84) 1313-1340(0.56) 1465-1490(0.40) 1793-1818(2.04) 2201-2227(1.08) 2269-2294(0.53)                                                               |
| gnl UG Hs#S4546286  | 0.22 | 1  | 120-145(0.22)                                                                                                                                                               |
| gnl UG Hs#S15634227 | 0.89 | 2  | 439-462(0.89) 1424-1449(0.40)                                                                                                                                               |
| gnl UG Hs#S4816905  | 0.72 | 3  | 368-393(0.40) 432-458(0.72) 520-543(0.37)                                                                                                                                   |
| gnl UG Hs#S2140045  | 0.59 | 1  | 561-589(0.59)                                                                                                                                                               |
| gnl UG Hs#S4810017  | 1.98 | 4  | 133-158(1.98) 198-223(1.08) 1167-1191(0.19) 2137-2162(1.72)                                                                                                                 |
| gnl UG Hs#S15644268 | 2.16 | 5  | 846-871(1.72) 956-981(1.39) 1043-1068(0.98) 1244-1269(2.16) 1279-1304(1.89)                                                                                                 |
| gnl UG Hs#S2293440  | 5.17 | 4  | 464-489(0.50) 1172-1198(0.50) 1309-1334(5.17) 1635-1660(0.87)                                                                                                               |
| gnl UG Hs#S7112434  | 6.37 | 2  | 1145-1170(6.37) 1189-1217(3.67)                                                                                                                                             |
| gnl UG Hs#S15631987 | 2.17 | 7  | 241-266(2.17) 425-453(1.98) 616-641(2.17) 800-828(1.98) 991-1016(2.17) 1180-1205(2.17) 1684-1711(1.26)                                                                      |
| gnl UG Hs#S7110941  | 2.86 | 4  | 307-332(0.04) 872-897(2.86) 1056-1082(2.08) 1118-1143(0.62)                                                                                                                 |
| gnl UG Hs#S11046566 | 4.04 | 2  | 238-263(0.81) 358-383(4.04)                                                                                                                                                 |
| gnl UG Hs#S1726489  | 2.07 | 1  | 1822-1847(2.07)                                                                                                                                                             |
| gnl UG Hs#S1731682  | 1.85 | 1  | 112-135(1.85)                                                                                                                                                               |
| gnl UG Hs#S4546034  | 2.7  | 3  | 185-210(2.48) 285-310(0.59) 704-729(2.70)                                                                                                                                   |
| gnl UG Hs#S2138753  | 2.11 | 3  | 182-210(2.11) 545-570(0.33) 2352-2378(0.88)                                                                                                                                 |
| gnl UG Hs#S4553545  | 1.84 | 2  | 292-318(1.84) 475-501(0.92)                                                                                                                                                 |
| gnl UG Hs#S1824431  | 0.17 | 1  | 3246-3271(0.17)                                                                                                                                                             |
| gnl UG Hs#S3218918  | 2.08 | 2  | 33-58(2.08) 135-160(1.62)                                                                                                                                                   |
| gnl UG Hs#S10880348 | 2.09 | 1  | 434-457(2.09)                                                                                                                                                               |
| gnl UG Hs#S1727931  | 1.4  | 2  | 105-133(1.40) 910-936(0.34)                                                                                                                                                 |
| gnl UG Hs#S2140575  | 1.46 | 1  | 75-100(1.46)                                                                                                                                                                |
| gnl UG Hs#S2138714  | 0.84 | 1  | 351-376(0.84)                                                                                                                                                               |
| gnl UG Hs#S2293626  | 1.74 | 3  | 346-371(0.81) 716-741(1.74) 778-804(0.50)                                                                                                                                   |
| gnl UG Hs#S3438925  | 0.3  | 2  | 1122-1150(0.30) 1224-1250(0.08)                                                                                                                                             |
| gnl UG Hs#S7111552  | 1.63 | 2  | 171-196(1.63) 303-328(0.41)                                                                                                                                                 |
| gnl UG Hs#S1729499  | 2.07 | 7  | 92-117(0.88) 484-509(2.07) 981-1008(0.35) 1131-1156(0.66) 1377-1403(0.17) 1516-1541(0.20) 1633-1658(0.59)                                                                   |
| gnl UG Hs#S15631638 | 0.14 | 1  | 923-948(0.14)                                                                                                                                                               |
| gnl UG Hs#S14802382 | 1.36 | 1  | 87-113(1.36)                                                                                                                                                                |
| gnl UG Hs#S5495024  | 0.65 | 2  | 855-879(0.20) 898-924(0.65)                                                                                                                                                 |
| gnl UG Hs#S3220022  | 1.55 | 5  | 59-84(0.93) 180-205(0.46) 355-383(1.55) 798-828(1.24) 912-937(0.62)                                                                                                         |
| gnl UG Hs#S1726994  | 0.8  | 1  | 228-255(0.80)                                                                                                                                                               |
| gnl UG Hs#S4546284  | 2.3  | 4  | 732-757(1.00) 1834-1859(2.30) 2192-2217(1.57) 2737-2762(1.46)                                                                                                               |
| gnl UG Hs#S1730983  | 0.91 | 2  | 331-356(0.91) 439-464(0.08)                                                                                                                                                 |
| gnl UG Hs#S4553474  | 0.75 | 1  | 891-916(0.75)                                                                                                                                                               |
| gnl UG Hs#S2293559  | 0.72 | 1  | 826-851(0.72)                                                                                                                                                               |
| gnl UG Hs#S5978551  | 1.57 | 2  | 831-856(1.57) 1064-1092(1.25)                                                                                                                                               |
| gnl UG Hs#S2293288  | 2.46 | 2  | 116-141(2.46) 813-841(0.20)                                                                                                                                                 |
| gnl UG Hs#S4827431  | 0.72 | 1  | 159-185(0.72)                                                                                                                                                               |
| gnl UG Hs#S3219984  | 3.56 | 3  | 433-458(1.91) 948-974(3.56) 1474-1499(1.47)                                                                                                                                 |
| gnl UG Hs#S4839874  | 2.57 | 3  | 251-275(2.16) 690-716(2.57) 744-769(0.25)                                                                                                                                   |
| gnl UG Hs#S7111014  | 3.75 | 11 | 251-276(2.63) 487-512(0.20) 1357-1384(0.08) 1410-1435(2.92) 1730-1758(1.08) 1768-1795(1.13) 1952-1977(0.97) 2771-2797(0.01) 3099-3124(0.32) 4086-4110(0.29) 4669-4695(3.75) |
| gnl UG Hs#S2294657  | 0.96 | 1  | 3633-3661(0.96)                                                                                                                                                             |
| gnl UG Hs#S4831151  | 0.62 | 1  | 82-106(0.62)                                                                                                                                                                |
| gnl UG Hs#S1730803  | 2.97 | 3  | 208-233(2.97) 283-306(0.14) 343-369(1.02)                                                                                                                                   |
| gnl UG Hs#S1727083  | 1.78 | 4  | 105-131(1.78) 1386-1411(0.82) 2092-2118(1.60) 3396-3422(0.41)                                                                                                               |
| gnl UG Hs#S4620996  | 1.01 | 1  | 1793-1821(1.01)                                                                                                                                                             |
| gnl UG Hs#S3881189  | 0.49 | 2  | 732-757(0.07) 985-1011(0.49)                                                                                                                                                |
| gnl UG Hs#S1730886  | 1.43 | 4  | 134-159(0.30) 295-320(1.43) 512-537(0.59) 540-565(0.33)                                                                                                                     |
| gnl UG Hs#S4807330  | 1.48 | 3  | 90-116(0.08) 163-188(1.48) 603-628(0.33)                                                                                                                                    |
| gnl UG Hs#S1728100  | 3.39 | 7  | 121-146(3.39) 270-296(3.21) 480-505(0.23) 696-721(0.57) 963-989(1.17) 1364-1389(1.26) 1424-1450(1.67)                                                                       |
| gnl UG Hs#S1728519  | 1.53 | 1  | 2244-2269(1.53)                                                                                                                                                             |

|                     |      |    |                                                                                                                                                                             |
|---------------------|------|----|-----------------------------------------------------------------------------------------------------------------------------------------------------------------------------|
| gnl UG Hs#S3601675  | 2.62 | 2  | 313-339(2.62) 427-452(2.52)                                                                                                                                                 |
| gnl UG Hs#S5978500  | 0.23 | 1  | 490-516(0.23)                                                                                                                                                               |
| gnl UG Hs#S3219978  | 2.36 | 2  | 585-613(1.03) 1134-1160(2.36)                                                                                                                                               |
| gnl UG Hs#S2140362  | 4.11 | 11 | 82-107(1.48) 453-478(1.11) 863-889(2.46) 1746-1771(0.50) 2051-2076(4.11) 2374-2402(1.75) 2801-2827(0.76) 3249-3277(3.14) 3281-3305(1.24) 3698-3726(0.35) 3910-3936(2.30)    |
| gnl UG Hs#S4285206  | 3.43 | 4  | 1037-1062(0.07) 1814-1840(0.43) 3086-3111(3.43) 3170-3196(2.53)                                                                                                             |
| gnl UG Hs#S15632677 | 1.48 | 1  | 172-197(1.48)                                                                                                                                                               |
| gnl UG Hs#S3219317  | 1.56 | 1  | 427-452(1.56)                                                                                                                                                               |
| gnl UG Hs#S2139354  | 2.07 | 1  | 327-352(2.07)                                                                                                                                                               |
| gnl UG Hs#S1969157  | 3.11 | 1  | 2044-2069(3.11)                                                                                                                                                             |
| gnl UG Hs#S2294307  | 4.75 | 2  | 109-135(4.75) 144-169(0.23)                                                                                                                                                 |
| gnl UG Hs#S4436334  | 2.65 | 2  | 319-345(2.65) 422-448(2.13)                                                                                                                                                 |
| gnl UG Hs#S1726566  | 1.75 | 3  | 269-294(1.14) 486-514(1.75) 768-795(0.02)                                                                                                                                   |
| gnl UG Hs#S3219234  | 4.95 | 2  | 460-485(4.95) 636-661(4.04)                                                                                                                                                 |
| gnl UG Hs#S15632428 | 0.2  | 1  | 648-673(0.20)                                                                                                                                                               |
| gnl UG Hs#S2293406  | 0.62 | 1  | 842-867(0.62)                                                                                                                                                               |
| gnl UG Hs#S3219219  | 0.23 | 1  | 368-394(0.23)                                                                                                                                                               |
| gnl UG Hs#S1728538  | 0.65 | 4  | 94-119(0.58) 637-663(0.65) 949-974(0.13) 1530-1555(0.46)                                                                                                                    |
| gnl UG Hs#S1732242  | 2.69 | 2  | 174-199(1.57) 206-231(2.69)                                                                                                                                                 |
| gnl UG Hs#S15631746 | 0.23 | 1  | 156-181(0.23)                                                                                                                                                               |
| gnl UG Hs#S1729419  | 1.88 | 3  | 870-896(0.81) 1273-1299(1.88) 1673-1700(0.38)                                                                                                                               |
| gnl UG Hs#S1732419  | 0.72 | 1  | 471-496(0.72)                                                                                                                                                               |
| gnl UG Hs#S4631383  | 1.46 | 1  | 1322-1347(1.46)                                                                                                                                                             |
| gnl UG Hs#S2139698  | 2.23 | 1  | 1540-1565(2.23)                                                                                                                                                             |
| gnl UG Hs#S1730088  | 0.26 | 1  | 719-744(0.26)                                                                                                                                                               |
| gnl UG Hs#S3438500  | 0.32 | 1  | 1148-1173(0.32)                                                                                                                                                             |
| gnl UG Hs#S1728905  | 0.04 | 1  | 481-506(0.04)                                                                                                                                                               |
| gnl UG Hs#S3439014  | 2.43 | 3  | 697-723(2.43) 743-767(1.62) 1211-1236(0.06)                                                                                                                                 |
| gnl UG Hs#S2294333  | 3.13 | 8  | 141-166(2.04) 372-397(1.63) 417-443(0.01) 575-600(3.13) 1998-2023(0.23) 2051-2076(0.13) 2604-2629(2.50) 2866-2892(1.50)                                                     |
| gnl UG Hs#S3219940  | 2.5  | 1  | 486-511(2.50)                                                                                                                                                               |
| gnl UG Hs#S5978426  | 4.17 | 1  | 71-98(4.17)                                                                                                                                                                 |
| gnl UG Hs#S1726228  | 1.63 | 1  | 411-436(1.63)                                                                                                                                                               |
| gnl UG Hs#S1729899  | 0.33 | 1  | 321-346(0.33)                                                                                                                                                               |
| gnl UG Hs#S417727   | 2.72 | 5  | 239-266(0.30) 902-927(0.11) 1740-1768(0.84) 1844-1869(2.72) 1870-1896(1.43)                                                                                                 |
| gnl UG Hs#S6693363  | 2.98 | 4  | 222-247(2.30) 423-449(0.69) 1659-1685(0.40) 1838-1866(2.98)                                                                                                                 |
| gnl UG Hs#S3438872  | 1.04 | 1  | 573-600(1.04)                                                                                                                                                               |
| gnl UG Hs#S11046695 | 5.95 | 1  | 7-33(5.95)                                                                                                                                                                  |
| gnl UG Hs#S3547254  | 2.3  | 5  | 55-80(1.57) 163-189(0.15) 265-290(0.89) 430-455(0.58) 717-742(2.30)                                                                                                         |
| gnl UG Hs#S1727867  | 0.94 | 2  | 445-470(0.94) 858-883(0.34)                                                                                                                                                 |
| gnl UG Hs#S1728560  | 4.99 | 3  | 176-202(4.99) 209-234(0.33) 445-471(2.17)                                                                                                                                   |
| gnl UG Hs#S3438554  | 1.4  | 2  | 382-407(1.40) 419-447(1.07)                                                                                                                                                 |
| gnl UG Hs#S3220011  | 5.53 | 6  | 484-507(0.87) 1509-1534(0.98) 2014-2041(0.84) 2072-2097(5.53) 3264-3290(0.27) 3515-3541(0.46)                                                                               |
| gnl UG Hs#S4619425  | 0.89 | 1  | 1200-1226(0.89)                                                                                                                                                             |
| gnl UG Hs#S1729268  | 2.97 | 6  | 319-344(2.97) 381-406(0.91) 546-571(2.72) 1350-1378(1.40) 1541-1566(0.40) 1595-1621(1.04)                                                                                   |
| gnl UG Hs#S10832648 | 5.95 | 3  | 1105-1130(5.95) 1445-1473(1.67) 2010-2036(3.56)                                                                                                                             |
| gnl UG Hs#S1569494  | 0.83 | 6  | 57-82(0.78) 503-528(0.83) 1779-1807(0.49) 1976-2000(0.43) 2518-2543(0.57) 2633-2656(0.58)                                                                                   |
| gnl UG Hs#S3439034  | 1.13 | 1  | 528-553(1.13)                                                                                                                                                               |
| gnl UG Hs#S1728207  | 2.79 | 3  | 5-30(1.17) 757-783(2.79) 786-811(1.13)                                                                                                                                      |
| gnl UG Hs#S4825779  | 2.99 | 2  | 385-411(2.99) 590-615(1.72)                                                                                                                                                 |
| gnl UG Hs#S3219355  | 5.16 | 11 | 289-314(4.55) 599-625(1.17) 1177-1202(2.79) 1351-1376(0.26) 1621-1646(0.72) 1985-2010(0.49) 2204-2230(0.07) 2439-2465(0.01) 3688-3713(1.94) 3745-3768(0.11) 3822-3849(5.16) |
| gnl UG Hs#S2139451  | 4.62 | 3  | 643-668(4.62) 1171-1196(4.26) 1930-1955(0.72)                                                                                                                               |
| gnl UG Hs#S1729718  | 1.22 | 1  | 664-689(1.22)                                                                                                                                                               |
| gnl UG Hs#S7112417  | 2.04 | 2  | 665-690(1.36) 775-798(2.04)                                                                                                                                                 |
| gnl UG Hs#S1730310  | 0.23 | 1  | 340-365(0.23)                                                                                                                                                               |
| gnl UG Hs#S6686662  | 1.58 | 3  | 145-170(0.76) 582-607(1.58) 700-728(0.62)                                                                                                                                   |

|                     |      |                                                                                                                                         |
|---------------------|------|-----------------------------------------------------------------------------------------------------------------------------------------|
| gnl UG Hs#S1731976  | 3.1  | 2 249-277(3.10) 462-488(1.08)                                                                                                           |
| gnl UG Hs#S1824457  | 5.92 | 5 366-392(1.26) 837-862(0.23) 1085-1112(2.62) 1405-1431(0.58) 1582-1607(5.92)                                                           |
| gnl UG Hs#S1728535  | 1.5  | 2 381-406(1.50) 542-568(0.62)                                                                                                           |
| gnl UG Hs#S15635920 | 2.31 | 1 1757-1783(2.31)                                                                                                                       |
| gnl UG Hs#S4808262  | 2.21 | 1 2990-3015(2.21)                                                                                                                       |
| gnl UG Hs#S15638567 | 1.23 | 2 938-964(0.40) 1098-1126(1.23)                                                                                                         |
| gnl UG Hs#S11154057 | 0.72 | 1 500-527(0.72)                                                                                                                         |
| gnl UG Hs#S3987835  | 0.94 | 2 1639-1664(0.94) 1729-1755(0.04)                                                                                                       |
| gnl UG Hs#S3619677  | 0.79 | 1 1422-1447(0.79)                                                                                                                       |
| gnl UG Hs#S1727168  | 1.5  | 6 307-334(0.65) 362-387(1.50) 613-641(0.62) 668-693(0.24) 805-831(0.59) 970-996(0.86)                                                   |
| gnl UG Hs#S2294455  | 2.56 | 2 102-125(2.56) 383-411(2.53)                                                                                                           |
| gnl UG Hs#S4044878  | 0.91 | 1 300-328(0.91)                                                                                                                         |
| gnl UG Hs#S2138878  | 4.5  | 1 1975-2001(4.50)                                                                                                                       |
| gnl UG Hs#S3603852  | 1.72 | 3 1434-1459(0.98) 1789-1815(1.72) 1836-1862(0.10)                                                                                       |
| gnl UG Hs#S1727454  | 1.98 | 1 282-308(1.98)                                                                                                                         |
| gnl UG Hs#S6682978  | 3.85 | 4 609-634(0.57) 1071-1099(3.85) 1168-1194(2.60) 1481-1506(3.62)                                                                         |
| gnl UG Hs#S3355655  | 1.23 | 2 251-276(1.23) 312-339(0.17)                                                                                                           |
| gnl UG Hs#S3219087  | 8.15 | 2 284-310(8.15) 942-967(1.67)                                                                                                           |
| gnl UG Hs#S1731003  | 0.98 | 1 189-215(0.98)                                                                                                                         |
| gnl UG Hs#S2293333  | 2.33 | 1 192-218(2.33)                                                                                                                         |
| gnl UG Hs#S1730196  | 1.04 | 1 164-189(1.04)                                                                                                                         |
| gnl UG Hs#S1727525  | 0.3  | 1 709-734(0.30)                                                                                                                         |
| gnl UG Hs#S15641130 | 2.27 | 6 2821-2846(1.17) 3273-3299(0.68) 4237-4263(0.40) 5338-5363(0.50) 5422-5448(1.08) 5471-5495(2.27)                                       |
| gnl UG Hs#S2293743  | 0.25 | 1 112-137(0.25)                                                                                                                         |
| gnl UG Hs#S1727827  | 0.69 | 1 903-930(0.69)                                                                                                                         |
| gnl UG Hs#S4631187  | 2.98 | 3 460-485(2.98) 812-840(2.30) 1240-1266(2.30)                                                                                           |
| gnl UG Hs#S3547116  | 1.72 | 2 155-181(1.72) 362-389(0.88)                                                                                                           |
| gnl UG Hs#S2139148  | 0.17 | 1 98-124(0.17)                                                                                                                          |
| gnl UG Hs#S14802477 | 3.76 | 1 522-550(3.76)                                                                                                                         |
| gnl UG Hs#S4623180  | 2.3  | 1 2119-2144(2.30)                                                                                                                       |
| gnl UG Hs#S14863424 | 1    | 3 52-79(0.97) 183-209(0.57) 267-291(1.00)                                                                                               |
| gnl UG Hs#S1728799  | 0.16 | 1 373-398(0.16)                                                                                                                         |
| gnl UG Hs#S5978405  | 1.94 | 3 146-171(1.94) 272-297(1.53) 302-328(1.36)                                                                                             |
| gnl UG Hs#S5979245  | 1.91 | 1 804-832(1.91)                                                                                                                         |
| gnl UG Hs#S4808098  | 2.3  | 2 399-424(2.30) 2155-2180(0.62)                                                                                                         |
| gnl UG Hs#S1824471  | 0.23 | 1 187-212(0.23)                                                                                                                         |
| gnl UG Hs#S1730023  | 2.53 | 5 344-369(1.50) 439-465(2.15) 784-809(2.53) 1494-1520(2.44) 1980-2006(0.36)                                                             |
| gnl UG Hs#S2294508  | 1.16 | 1 110-135(1.16)                                                                                                                         |
| gnl UG Hs#S1728209  | 0.43 | 4 205-231(0.43) 1029-1059(0.07) 1541-1566(0.17) 2005-2030(0.11)                                                                         |
| gnl UG Hs#S11046676 | 1.11 | 2 1446-1473(0.31) 1932-1958(1.11)                                                                                                       |
| gnl UG Hs#S15638847 | 1.75 | 2 185-210(1.75) 255-281(1.52)                                                                                                           |
| gnl UG Hs#S3219433  | 0.36 | 1 347-373(0.36)                                                                                                                         |
| gnl UG Hs#S4554468  | 1.08 | 1 241-267(1.08)                                                                                                                         |
| gnl UG Hs#S3940104  | 0.08 | 1 493-518(0.08)                                                                                                                         |
| gnl UG Hs#S1727362  | 2.04 | 1 669-694(2.04)                                                                                                                         |
| gnl UG Hs#S1728522  | 0.94 | 3 425-449(0.94) 559-585(0.59) 798-824(0.82)                                                                                             |
| gnl UG Hs#S3972969  | 3.11 | 9 158-183(0.46) 215-240(1.43) 251-278(0.56) 377-402(0.35) 778-804(0.13) 1673-1699(0.98) 1791-1816(3.11) 2313-2337(1.75) 2652-2680(2.98) |
| gnl UG Hs#S3438391  | 0.79 | 1 341-367(0.79)                                                                                                                         |
| gnl UG Hs#S4396074  | 4.39 | 1 105-130(4.39)                                                                                                                         |
| gnl UG Hs#S2293860  | 0.3  | 1 693-718(0.30)                                                                                                                         |
| gnl UG Hs#S4044890  | 0.76 | 1 566-592(0.76)                                                                                                                         |
| gnl UG Hs#S4820138  | 1.52 | 2 253-278(1.52) 1346-1373(1.07)                                                                                                         |
| gnl UG Hs#S3438737  | 1.07 | 2 1090-1118(0.40) 1419-1444(1.07)                                                                                                       |
| gnl UG Hs#S15631470 | 1.8  | 3 617-642(0.62) 1134-1162(1.34) 1230-1256(1.80)                                                                                         |

|                     |      |    |                                                                                                                                                               |
|---------------------|------|----|---------------------------------------------------------------------------------------------------------------------------------------------------------------|
| gnl UG Hs#S3547082  | 0.94 | 1  | 321-349(0.94)                                                                                                                                                 |
| gnl UG Hs#S3438507  | 0.65 | 1  | 43-68(0.65)                                                                                                                                                   |
| gnl UG Hs#S4807692  | 1.18 | 1  | 710-735(1.18)                                                                                                                                                 |
| gnl UG Hs#S1727229  | 1.91 | 2  | 147-172(1.91) 628-656(1.88)                                                                                                                                   |
| gnl UG Hs#S3601753  | 3.2  | 3  | 761-786(3.20) 1354-1379(1.00) 1601-1627(1.94)                                                                                                                 |
| gnl UG Hs#S7113187  | 0.84 | 1  | 12-35(0.84)                                                                                                                                                   |
| gnl UG Hs#S10832567 | 0.3  | 1  | 780-805(0.30)                                                                                                                                                 |
| gnl UG Hs#S14802307 | 0.56 | 2  | 283-314(0.56) 565-590(0.23)                                                                                                                                   |
| gnl UG Hs#S2139040  | 2.19 | 3  | 618-642(0.26) 2897-2922(2.19) 4275-4301(0.76)                                                                                                                 |
| gnl UG Hs#S2293809  | 0.75 | 1  | 133-158(0.75)                                                                                                                                                 |
| gnl UG Hs#S1732341  | 3.3  | 9  | 178-203(2.82) 975-1000(2.32) 1259-1284(1.40) 1604-1630(3.30) 1653-1678(1.03) 1918-1944(0.75) 2088-2114(0.36) 2117-2142(1.73) 2201-2225(0.20)                  |
| gnl UG Hs#S2140223  | 1.36 | 1  | 181-207(1.36)                                                                                                                                                 |
| gnl UG Hs#S1727296  | 0.49 | 1  | 455-483(0.49)                                                                                                                                                 |
| gnl UG Hs#S1729016  | 0.72 | 1  | 62-87(0.72)                                                                                                                                                   |
| gnl UG Hs#S5978585  | 0.58 | 1  | 1732-1758(0.58)                                                                                                                                               |
| gnl UG Hs#S3601620  | 2.08 | 5  | 552-579(0.58) 1787-1812(1.72) 1853-1879(0.28) 1883-1908(2.08) 1975-2003(0.75)                                                                                 |
| gnl UG Hs#S1726610  | 1.19 | 1  | 909-939(1.19)                                                                                                                                                 |
| gnl UG Hs#S2139573  | 1.5  | 1  | 1289-1314(1.50)                                                                                                                                               |
| gnl UG Hs#S2139206  | 1.89 | 1  | 153-178(1.89)                                                                                                                                                 |
| gnl UG Hs#S10832312 | 0.35 | 2  | 341-369(0.35) 2057-2082(0.30)                                                                                                                                 |
| gnl UG Hs#S1727101  | 2.82 | 8  | 393-418(0.53) 419-445(2.82) 600-625(1.62) 698-726(2.17) 917-942(2.17) 1005-1030(0.72) 1328-1353(2.72) 1741-1767(2.79)                                         |
| gnl UG Hs#S14812397 | 3.56 | 1  | 1305-1330(3.56)                                                                                                                                               |
| gnl UG Hs#S5931220  | 5.4  | 2  | 646-672(5.40) 1362-1387(0.50)                                                                                                                                 |
| gnl UG Hs#S4807826  | 1.36 | 1  | 461-487(1.36)                                                                                                                                                 |
| gnl UG Hs#S1727328  | 0.33 | 1  | 782-808(0.33)                                                                                                                                                 |
| gnl UG Hs#S1727642  | 1.48 | 2  | 283-308(1.48) 544-572(1.26)                                                                                                                                   |
| gnl UG Hs#S2140690  | 4.62 | 8  | 371-397(4.62) 1733-1761(0.81) 1820-1846(2.50) 2437-2462(0.58) 3190-3218(0.45) 3700-3724(0.29) 3872-3897(0.20) 3968-3996(1.45)                                 |
| gnl UG Hs#S5979237  | 2.4  | 3  | 513-539(2.40) 959-985(0.30) 1055-1080(0.76)                                                                                                                   |
| gnl UG Hs#S1731772  | 1.17 | 1  | 629-654(1.17)                                                                                                                                                 |
| gnl UG Hs#S1824513  | 2.2  | 5  | 91-117(1.82) 238-264(0.08) 311-336(1.48) 751-776(0.33) 816-841(2.20)                                                                                          |
| gnl UG Hs#S1728144  | 0.67 | 1  | 639-665(0.67)                                                                                                                                                 |
| gnl UG Hs#S2139510  | 2.85 | 6  | 69-94(2.85) 828-853(1.33) 1797-1823(2.30) 2027-2055(1.26) 2173-2200(0.14) 2243-2268(0.46)                                                                     |
| gnl UG Hs#S4612980  | 0.65 | 1  | 139-165(0.65)                                                                                                                                                 |
| gnl UG Hs#S5979230  | 5.67 | 2  | 268-294(5.67) 348-376(1.08)                                                                                                                                   |
| gnl UG Hs#S2140234  | 0.75 | 1  | 125-152(0.75)                                                                                                                                                 |
| gnl UG Hs#S3219244  | 2.39 | 2  | 104-129(1.40) 224-251(2.39)                                                                                                                                   |
| gnl UG Hs#S2139057  | 2.72 | 2  | 298-322(2.72) 488-514(2.72)                                                                                                                                   |
| gnl UG Hs#S4553512  | 0.55 | 1  | 120-148(0.55)                                                                                                                                                 |
| gnl UG Hs#S4823544  | 2.21 | 1  | 83-106(2.21)                                                                                                                                                  |
| gnl UG Hs#S2293360  | 0.57 | 2  | 25-50(0.57) 976-1002(0.17)                                                                                                                                    |
| gnl UG Hs#S14272940 | 0.5  | 1  | 3083-3108(0.50)                                                                                                                                               |
| gnl UG Hs#S5860348  | 0.11 | 1  | 762-787(0.11)                                                                                                                                                 |
| gnl UG Hs#S2293251  | 3.92 | 5  | 947-971(0.53) 989-1014(3.92) 1144-1172(0.88) 1230-1255(2.94) 1827-1854(1.26)                                                                                  |
| gnl UG Hs#S3803692  | 5.26 | 6  | 162-187(0.23) 426-452(2.79) 652-679(1.52) 1023-1048(5.26) 1581-1604(0.25) 1672-1698(0.08)                                                                     |
| gnl UG Hs#S1731223  | 4.11 | 10 | 797-824(0.94) 1451-1479(1.88) 1822-1847(1.30) 1915-1940(2.04) 2811-2836(0.53) 3350-3376(0.10) 3385-3410(1.13) 4076-4102(1.76) 4215-4241(0.30) 4286-4311(4.11) |
| gnl UG Hs#S4812395  | 1.39 | 3  | 108-134(1.39) 1002-1028(0.67) 1264-1289(1.16)                                                                                                                 |
| gnl UG Hs#S2293912  | 3.69 | 1  | 176-201(3.69)                                                                                                                                                 |
| gnl UG Hs#S15632494 | 4.5  | 2  | 46-71(0.11) 99-124(4.50)                                                                                                                                      |
| gnl UG Hs#S4822110  | 0.66 | 2  | 1465-1491(0.01) 1904-1930(0.66)                                                                                                                               |
| gnl UG Hs#S1727414  | 1.41 | 1  | 93-118(1.41)                                                                                                                                                  |
| gnl UG Hs#S1726893  | 0.24 | 1  | 180-206(0.24)                                                                                                                                                 |
| gnl UG Hs#S11154067 | 3.62 | 6  | 216-241(3.62) 324-353(1.32) 451-478(0.83) 553-581(1.20) 913-938(0.91) 1032-1058(0.92)                                                                         |
| gnl UG Hs#S4045639  | 1.91 | 2  | 400-426(0.08) 535-563(1.91)                                                                                                                                   |
| gnl UG Hs#S4820170  | 0.04 | 1  | 108-134(0.04)                                                                                                                                                 |

|                     |      |    |                                                                                                                                                                        |
|---------------------|------|----|------------------------------------------------------------------------------------------------------------------------------------------------------------------------|
| gnl UG Hs#S15637876 | 5.07 | 5  | 180-205(3.14) 458-483(2.72) 752-777(5.07) 983-1011(0.49) 1278-1303(0.69)                                                                                               |
| gnl UG Hs#S4823767  | 2.63 | 1  | 493-518(2.63)                                                                                                                                                          |
| gnl UG Hs#S1726214  | 2.27 | 2  | 58-84(2.27) 359-384(0.30)                                                                                                                                              |
| gnl UG Hs#S2294124  | 3.71 | 2  | 878-903(3.71) 1914-1939(0.57)                                                                                                                                          |
| gnl UG Hs#S7111934  | 1.36 | 2  | 736-764(0.30) 937-962(1.36)                                                                                                                                            |
| gnl UG Hs#S4545975  | 2.94 | 4  | 542-567(2.08) 641-666(2.94) 823-848(0.36) 1392-1417(1.14)                                                                                                              |
| gnl UG Hs#S2294214  | 0.71 | 4  | 39-65(0.34) 92-118(0.58) 293-321(0.08) 819-842(0.71)                                                                                                                   |
| gnl UG Hs#S1731331  | 0.13 | 1  | 1366-1392(0.13)                                                                                                                                                        |
| gnl UG Hs#S1726724  | 0.04 | 1  | 319-345(0.04)                                                                                                                                                          |
| gnl UG Hs#S10832691 | 0.5  | 2  | 121-146(0.50) 163-190(0.22)                                                                                                                                            |
| gnl UG Hs#S4807795  | 0.04 | 1  | 524-549(0.04)                                                                                                                                                          |
| gnl UG Hs#S1244972  | 1.94 | 1  | 2866-2892(1.94)                                                                                                                                                        |
| gnl UG Hs#S2138995  | 3.69 | 4  | 349-375(0.76) 552-576(0.11) 926-952(3.69) 1251-1278(1.26)                                                                                                              |
| gnl UG Hs#S4824869  | 3.72 | 11 | 113-139(0.23) 617-642(1.72) 708-733(2.26) 823-849(1.04) 977-1002(3.39) 1046-1071(0.30) 1145-1169(3.43) 1269-1294(0.23) 1298-1323(0.97) 1762-1787(1.30) 2089-2114(3.72) |
| gnl UG Hs#S2293534  | 0.4  | 1  | 532-558(0.40)                                                                                                                                                          |
| gnl UG Hs#S5978662  | 2.59 | 3  | 641-666(0.91) 1002-1025(0.37) 1722-1750(2.59)                                                                                                                          |
| gnl UG Hs#S4824657  | 2.56 | 2  | 520-546(1.36) 613-639(2.56)                                                                                                                                            |
| gnl UG Hs#S1729054  | 1.58 | 2  | 811-836(0.24) 947-972(1.58)                                                                                                                                            |
| gnl UG Hs#S2140378  | 2.76 | 7  | 130-157(0.44) 221-246(1.81) 256-281(1.26) 941-966(1.19) 1010-1036(2.76) 1234-1262(1.07) 1375-1402(1.21)                                                                |
| gnl UG Hs#S3987157  | 1.94 | 2  | 545-570(0.30) 609-634(1.94)                                                                                                                                            |
| gnl UG Hs#S1824531  | 2.4  | 1  | 163-191(2.40)                                                                                                                                                          |
| gnl UG Hs#S2139638  | 5.14 | 5  | 560-583(0.60) 1892-1920(0.62) 1990-2015(2.33) 2179-2205(5.14) 2975-3001(1.67)                                                                                          |
| gnl UG Hs#S5978632  | 1.94 | 3  | 421-449(1.29) 1429-1454(0.11) 2135-2161(1.94)                                                                                                                          |
| gnl UG Hs#S10832128 | 0.04 | 1  | 1549-1574(0.04)                                                                                                                                                        |
| gnl UG Hs#S2139659  | 5.3  | 3  | 894-919(0.72) 1879-1904(5.30) 2487-2515(1.01)                                                                                                                          |
| gnl UG Hs#S4392145  | 2.16 | 10 | 594-619(0.52) 698-724(0.72) 929-954(2.16) 1093-1119(0.59) 1156-1180(0.28) 1194-1220(0.72) 1226-1251(0.94) 2068-2098(2.03) 2762-2787(2.04) 2958-2983(1.17)              |
| gnl UG Hs#S10832693 | 2.71 | 1  | 606-631(2.71)                                                                                                                                                          |
| gnl UG Hs#S2139456  | 1.4  | 1  | 209-235(1.40)                                                                                                                                                          |
| gnl UG Hs#S15631441 | 2.56 | 2  | 75-99(2.56) 371-396(1.72)                                                                                                                                              |
| gnl UG Hs#S2139668  | 1.82 | 3  | 820-845(1.75) 2191-2216(0.44) 4089-4114(1.82)                                                                                                                          |
| gnl UG Hs#S4822797  | 1.2  | 1  | 139-164(1.20)                                                                                                                                                          |
| gnl UG Hs#S2140596  | 0.62 | 1  | 14-39(0.62)                                                                                                                                                            |
| gnl UG Hs#S1727243  | 3.3  | 1  | 14-42(3.30)                                                                                                                                                            |
| gnl UG Hs#S3220235  | 2.13 | 4  | 119-145(2.13) 153-178(0.76) 182-208(0.08) 372-400(1.23)                                                                                                                |
| gnl UG Hs#S2294296  | 0.53 | 1  | 36-62(0.53)                                                                                                                                                            |
| gnl UG Hs#S2293276  | 1.05 | 2  | 983-1008(0.33) 1320-1347(1.05)                                                                                                                                         |
| gnl UG Hs#S5978387  | 0.85 | 1  | 104-131(0.85)                                                                                                                                                          |
| gnl UG Hs#S1730389  | 0.91 | 1  | 604-632(0.91)                                                                                                                                                          |
| gnl UG Hs#S1729908  | 0.2  | 1  | 106-131(0.20)                                                                                                                                                          |
| gnl UG Hs#S15631730 | 2.26 | 3  | 46-74(2.26) 89-115(2.04) 540-566(0.27)                                                                                                                                 |
| gnl UG Hs#S4435743  | 2.23 | 1  | 1395-1421(2.23)                                                                                                                                                        |
| gnl UG Hs#S1730362  | 0.85 | 3  | 308-334(0.71) 1274-1299(0.63) 1400-1426(0.85)                                                                                                                          |
| gnl UG Hs#S3993263  | 1.98 | 3  | 722-750(1.30) 1265-1293(0.73) 1494-1520(1.98)                                                                                                                          |
| gnl UG Hs#S5978667  | 0.72 | 1  | 236-262(0.72)                                                                                                                                                          |
| gnl UG Hs#S11046722 | 4.04 | 5  | 244-269(4.04) 341-367(0.12) 1142-1167(1.04) 1207-1232(0.40) 1698-1724(1.26)                                                                                            |
| gnl UG Hs#S2293989  | 0.27 | 1  | 1437-1462(0.27)                                                                                                                                                        |
| gnl UG Hs#S4395975  | 1.24 | 2  | 1334-1359(1.24) 1812-1837(0.13)                                                                                                                                        |
| gnl UG Hs#S3619174  | 2.08 | 1  | 112-138(2.08)                                                                                                                                                          |
| gnl UG Hs#S1728575  | 3.91 | 6  | 401-426(2.62) 1173-1199(0.28) 2268-2293(3.08) 2422-2447(3.91) 2584-2612(1.85) 3257-3282(0.62)                                                                          |
| gnl UG Hs#S1731208  | 1.85 | 5  | 104-129(0.74) 335-360(1.85) 598-626(0.96) 635-659(0.45) 1298-1326(1.49)                                                                                                |
| gnl UG Hs#S6682959  | 1.58 | 7  | 240-266(0.46) 668-692(0.56) 1234-1259(1.23) 1734-1759(0.58) 2249-2275(0.95) 2700-2726(1.58) 2864-2890(0.65)                                                            |
| gnl UG Hs#S1728880  | 0.01 | 1  | 168-194(0.01)                                                                                                                                                          |
| gnl UG Hs#S5978434  | 0.84 | 1  | 972-998(0.84)                                                                                                                                                          |
| gnl UG Hs#S1732119  | 6.04 | 8  | 333-357(1.30) 394-420(2.40) 723-748(0.91) 893-919(0.46) 998-1023(1.26) 1095-1121(6.04) 1170-1196(0.17) 1232-1261(0.23)                                                 |

|                     |      |   |                                                                                                             |
|---------------------|------|---|-------------------------------------------------------------------------------------------------------------|
| gnl UG Hs#S1731594  | 3.56 | 5 | 831-856(0.07) 889-915(0.01) 1558-1586(0.66) 2060-2087(3.56) 2381-2406(2.59)                                 |
| gnl UG Hs#S4820140  | 0.36 | 1 | 358-383(0.36)                                                                                               |
| gnl UG Hs#S2294193  | 0.4  | 1 | 289-314(0.40)                                                                                               |
| gnl UG Hs#S342511   | 1.98 | 1 | 670-695(1.98)                                                                                               |
| gnl UG Hs#S4553559  | 0.31 | 1 | 573-596(0.31)                                                                                               |
| gnl UG Hs#S1727763  | 0.3  | 1 | 100-125(0.30)                                                                                               |
| gnl UG Hs#S1730167  | 2.08 | 2 | 57-82(0.20) 659-685(2.08)                                                                                   |
| gnl UG Hs#S2139366  | 2.79 | 1 | 118-144(2.79)                                                                                               |
| gnl UG Hs#S1731848  | 1.59 | 7 | 574-599(0.08) 814-839(0.94) 862-887(0.03) 939-964(0.53) 1179-1204(0.30) 1532-1560(1.59) 1782-1808(0.04)     |
| gnl UG Hs#S4812687  | 1.39 | 1 | 108-134(1.39)                                                                                               |
| gnl UG Hs#S2139060  | 2.17 | 1 | 439-464(2.17)                                                                                               |
| gnl UG Hs#S2139681  | 1.4  | 2 | 169-194(1.40) 238-264(0.23)                                                                                 |
| gnl UG Hs#S1728648  | 1.81 | 3 | 343-368(0.88) 1648-1671(0.11) 1873-1901(1.81)                                                               |
| gnl UG Hs#S3814593  | 2.24 | 6 | 121-147(0.76) 205-230(0.81) 517-542(2.24) 631-657(1.21) 684-710(2.13) 948-974(0.17)                         |
| gnl UG Hs#S1729290  | 5.07 | 2 | 119-144(5.07) 254-280(3.55)                                                                                 |
| gnl UG Hs#S1731757  | 0.3  | 2 | 434-462(0.04) 662-687(0.30)                                                                                 |
| gnl UG Hs#S2293518  | 1.26 | 3 | 349-374(0.07) 383-408(1.26) 1213-1238(0.07)                                                                 |
| gnl UG Hs#S15730307 | 0.13 | 1 | 498-523(0.13)                                                                                               |
| gnl UG Hs#S1727594  | 1.08 | 2 | 1394-1419(0.59) 1828-1855(1.08)                                                                             |
| gnl UG Hs#S1729392  | 3.32 | 1 | 431-456(3.32)                                                                                               |
| gnl UG Hs#S1728521  | 0.9  | 2 | 72-100(0.90) 366-392(0.17)                                                                                  |
| gnl UG Hs#S2140048  | 1.04 | 1 | 180-208(1.04)                                                                                               |
| gnl UG Hs#S4813338  | 3.97 | 1 | 760-783(3.97)                                                                                               |
| gnl UG Hs#S4285033  | 2.56 | 4 | 300-325(0.50) 894-918(0.40) 1034-1059(2.56) 1184-1210(1.01)                                                 |
| gnl UG Hs#S3322090  | 1.36 | 3 | 384-412(1.36) 474-500(0.87) 1143-1169(0.20)                                                                 |
| gnl UG Hs#S2293438  | 0.4  | 1 | 5-31(0.40)                                                                                                  |
| gnl UG Hs#S3619539  | 1.04 | 2 | 183-207(1.04) 237-263(0.11)                                                                                 |
| gnl UG Hs#S4815642  | 0.13 | 1 | 1021-1046(0.13)                                                                                             |
| gnl UG Hs#S1731961  | 0.63 | 1 | 153-180(0.63)                                                                                               |
| gnl UG Hs#S15730315 | 1.67 | 3 | 249-275(1.67) 373-398(0.33) 451-476(0.63)                                                                   |
| gnl UG Hs#S1726953  | 0.88 | 1 | 364-389(0.88)                                                                                               |
| gnl UG Hs#S4827248  | 0.85 | 1 | 70-95(0.85)                                                                                                 |
| gnl UG Hs#S6091857  | 1.5  | 1 | 75-101(1.50)                                                                                                |
| gnl UG Hs#S1729865  | 3.46 | 2 | 719-745(2.49) 938-963(3.46)                                                                                 |
| gnl UG Hs#S3988048  | 0.59 | 3 | 1209-1235(0.59) 1858-1885(0.04) 2195-2220(0.04)                                                             |
| gnl UG Hs#S1726528  | 1.17 | 3 | 192-217(0.33) 385-411(0.91) 1216-1239(1.17)                                                                 |
| gnl UG Hs#S1727159  | 0.5  | 1 | 9-34(0.50)                                                                                                  |
| gnl UG Hs#S4554595  | 5.89 | 5 | 1090-1116(0.04) 1161-1187(0.36) 1310-1335(0.26) 1402-1427(2.20) 1439-1464(5.89)                             |
| gnl UG Hs#S3355584  | 1.98 | 1 | 455-483(1.98)                                                                                               |
| gnl UG Hs#S3219576  | 1.33 | 1 | 34-59(1.33)                                                                                                 |
| gnl UG Hs#S1729625  | 4.39 | 7 | 219-249(1.47) 625-650(2.53) 1917-1942(2.71) 2086-2111(1.87) 2143-2168(0.72) 2567-2592(4.39) 2535-2560(2.30) |
| gnl UG Hs#S4828440  | 1.14 | 1 | 5-30(1.14)                                                                                                  |
| gnl UG Hs#S3547096  | 1.64 | 2 | 382-410(1.64) 426-451(0.79)                                                                                 |
| gnl UG Hs#S4829517  | 0.91 | 1 | 1380-1405(0.91)                                                                                             |
| gnl UG Hs#S2138857  | 0.33 | 2 | 16-41(0.23) 439-469(0.33)                                                                                   |
| gnl UG Hs#S4284745  | 1.01 | 2 | 242-269(1.01) 344-369(0.87)                                                                                 |
| gnl UG Hs#S1728160  | 1.05 | 1 | 204-230(1.05)                                                                                               |
| gnl UG Hs#S2138750  | 1.89 | 2 | 279-305(1.48) 596-621(1.89)                                                                                 |
| gnl UG Hs#S3619623  | 3.95 | 6 | 35-60(3.95) 107-133(2.99) 456-481(0.95) 1031-1059(1.40) 1367-1390(1.49) 1531-1556(0.91)                     |
| gnl UG Hs#S3438722  | 3.28 | 4 | 146-171(0.08) 391-419(0.71) 425-453(2.07) 718-744(3.28)                                                     |
| gnl UG Hs#S2649396  | 3.55 | 5 | 380-405(2.49) 1803-1828(2.91) 2121-2146(1.04) 2481-2509(3.13) 2585-2611(3.55)                               |
| gnl UG Hs#S6163283  | 3.62 | 2 | 2130-2155(1.11) 2524-2550(3.62)                                                                             |
| gnl UG Hs#S1731514  | 0.3  | 1 | 580-605(0.30)                                                                                               |
| gnl UG Hs#S1726289  | 4.01 | 4 | 1560-1586(1.50) 1607-1632(0.20) 1899-1924(2.04) 2039-2064(4.01)                                             |

|                     |      |   |                                                                                                                               |
|---------------------|------|---|-------------------------------------------------------------------------------------------------------------------------------|
| gnl UG Hs#S3355517  | 1.13 | 1 | 202-228(1.13)                                                                                                                 |
| gnl UG Hs#S4554631  | 2.94 | 8 | 857-882(2.94) 1082-1107(0.34) 1498-1523(1.13) 1566-1594(0.36) 1620-1645(1.02) 1795-1820(0.07) 2090-2115(0.11) 2223-2251(2.40) |
| gnl UG Hs#S7112245  | 0.72 | 2 | 1799-1824(0.72) 2108-2133(0.72)                                                                                               |
| gnl UG Hs#S1729257  | 1.78 | 2 | 241-266(1.68) 402-427(1.78)                                                                                                   |
| gnl UG Hs#S4820339  | 0.69 | 2 | 1289-1315(0.69) 1667-1692(0.33)                                                                                               |
| gnl UG Hs#S4813442  | 2.76 | 2 | 507-533(0.02) 2071-2097(2.76)                                                                                                 |
| gnl UG Hs#S4554574  | 0.13 | 1 | 467-492(0.13)                                                                                                                 |
| gnl UG Hs#S4435174  | 0.14 | 1 | 1555-1581(0.14)                                                                                                               |
| gnl UG Hs#S2140549  | 3.13 | 1 | 616-644(3.13)                                                                                                                 |
| gnl UG Hs#S1730193  | 1.23 | 1 | 57-83(1.23)                                                                                                                   |
| gnl UG Hs#S1727395  | 1.91 | 5 | 289-314(1.53) 371-399(1.30) 644-672(1.03) 787-810(0.41) 1041-1068(1.91)                                                       |
| gnl UG Hs#S4546224  | 0.57 | 1 | 3135-3163(0.57)                                                                                                               |
| gnl UG Hs#S3219819  | 0.91 | 1 | 162-187(0.91)                                                                                                                 |
| gnl UG Hs#S3219395  | 1.17 | 1 | 1462-1487(1.17)                                                                                                               |
| gnl UG Hs#S15631743 | 2.53 | 5 | 367-394(1.30) 400-428(0.30) 567-593(1.82) 676-701(0.26) 949-974(2.53)                                                         |
| gnl UG Hs#S1732349  | 1.76 | 2 | 784-809(0.45) 954-979(1.76)                                                                                                   |
| gnl UG Hs#S3219148  | 0.97 | 4 | 637-662(0.46) 696-722(0.57) 928-953(0.97) 982-1007(0.91)                                                                      |
| gnl UG Hs#S3603826  | 1.39 | 3 | 34-60(1.01) 489-515(0.82) 904-929(1.39)                                                                                       |
| gnl UG Hs#S3218928  | 0.4  | 1 | 1588-1615(0.40)                                                                                                               |
| gnl UG Hs#S7110553  | 3.04 | 7 | 275-299(0.17) 497-522(3.04) 536-561(1.52) 930-957(1.83) 1316-1342(0.13) 2039-2064(2.08) 2291-2316(1.17)                       |
| gnl UG Hs#S4823607  | 1.14 | 4 | 350-375(0.34) 478-503(0.50) 658-682(1.14) 2552-2577(1.08)                                                                     |
| gnl UG Hs#S11046584 | 4.4  | 3 | 241-267(1.01) 491-514(0.20) 939-967(4.40)                                                                                     |
| gnl UG Hs#S2140488  | 0.91 | 2 | 398-423(0.65) 434-460(0.91)                                                                                                   |
| gnl UG Hs#S1824552  | 3.82 | 2 | 136-159(1.81) 387-413(3.82)                                                                                                   |
| gnl UG Hs#S14802405 | 2.46 | 2 | 503-528(1.13) 1488-1513(2.46)                                                                                                 |
| gnl UG Hs#S2139389  | 1.14 | 2 | 428-453(1.14) 468-494(0.01)                                                                                                   |
| gnl UG Hs#S1731169  | 2.08 | 1 | 1691-1719(2.08)                                                                                                               |
| gnl UG Hs#S4819111  | 2.07 | 2 | 149-174(1.23) 866-891(2.07)                                                                                                   |
| gnl UG Hs#S1727981  | 1.3  | 1 | 102-128(1.30)                                                                                                                 |
| gnl UG Hs#S3619232  | 0.87 | 1 | 143-168(0.87)                                                                                                                 |
| gnl UG Hs#S4807745  | 1.92 | 2 | 578-606(0.04) 888-916(1.92)                                                                                                   |
| gnl UG Hs#S15115850 | 1.18 | 3 | 203-228(1.18) 590-615(0.98) 741-766(0.63)                                                                                     |
| gnl UG Hs#S5978583  | 1.5  | 1 | 214-239(1.50)                                                                                                                 |
| gnl UG Hs#S3219835  | 2.27 | 4 | 165-190(0.91) 284-310(2.27) 442-468(2.23) 564-589(0.07)                                                                       |
| gnl UG Hs#S1728086  | 1.37 | 5 | 75-102(0.07) 355-380(0.72) 672-698(0.27) 930-955(1.37) 963-990(1.13)                                                          |
| gnl UG Hs#S4825328  | 1.33 | 3 | 31-55(0.62) 505-531(1.33) 1088-1113(0.36)                                                                                     |
| gnl UG Hs#S3547070  | 0.8  | 3 | 216-244(0.40) 325-353(0.59) 430-455(0.80)                                                                                     |
| gnl UG Hs#S1727443  | 3.79 | 7 | 182-207(3.11) 1157-1183(1.89) 1551-1577(0.20) 1683-1708(3.01) 2118-2143(0.43) 2178-2203(3.79) 2313-2338(2.49)                 |
| gnl UG Hs#S4435390  | 2.2  | 2 | 198-224(2.20) 614-640(2.20)                                                                                                   |
| gnl UG Hs#S1729941  | 2.3  | 3 | 50-75(1.26) 410-435(2.30) 630-655(0.97)                                                                                       |
| gnl UG Hs#S1824325  | 2.47 | 1 | 726-752(2.47)                                                                                                                 |
| gnl UG Hs#S1727580  | 5.5  | 2 | 884-909(2.78) 1747-1772(5.50)                                                                                                 |
| gnl UG Hs#S1731835  | 2.04 | 2 | 825-851(1.55) 953-978(2.04)                                                                                                   |
| gnl UG Hs#S15632342 | 2.4  | 2 | 18-42(2.40) 231-258(0.26)                                                                                                     |
| gnl UG Hs#S11154195 | 2.4  | 1 | 468-495(2.40)                                                                                                                 |
| gnl UG Hs#S3619210  | 0.72 | 1 | 458-483(0.72)                                                                                                                 |
| gnl UG Hs#S2294156  | 0.89 | 2 | 415-440(0.19) 472-497(0.89)                                                                                                   |
| gnl UG Hs#S2140003  | 0.2  | 1 | 74-99(0.20)                                                                                                                   |
| gnl UG Hs#S3973083  | 2.01 | 1 | 104-131(2.01)                                                                                                                 |
| gnl UG Hs#S3438585  | 0.04 | 1 | 343-369(0.04)                                                                                                                 |
| gnl UG Hs#S3219985  | 1.13 | 1 | 364-390(1.13)                                                                                                                 |
| gnl UG Hs#S4630840  | 2.77 | 5 | 526-551(2.77) 834-859(1.34) 1320-1345(1.46) 1658-1683(1.40) 1907-1932(1.98)                                                   |
| gnl UG Hs#S4612737  | 3.2  | 7 | 579-604(1.39) 783-808(3.20) 822-847(0.07) 1073-1098(1.46) 1105-1130(2.04) 1287-1312(1.07) 1801-1829(0.30)                     |
| gnl UG Hs#S4001875  | 3.36 | 5 | 117-144(3.01) 330-355(3.36) 437-462(0.14) 764-789(0.50) 1023-1049(0.30)                                                       |



|                     |      |                                                                                                                                                                                              |
|---------------------|------|----------------------------------------------------------------------------------------------------------------------------------------------------------------------------------------------|
| gnl UG Hs#S2293950  | 2.4  | 2 84-109(0.13) 244-269(2.40)                                                                                                                                                                 |
| gnl UG Hs#S4044971  | 2.17 | 7 32-57(1.11) 1085-1111(1.69) 1241-1266(0.36) 1568-1594(2.17) 1760-1786(0.48) 2185-2213(1.72) 2607-2632(1.40)                                                                                |
| gnl UG Hs#S4807855  | 2.2  | 2 23-51(0.03) 612-637(2.20)                                                                                                                                                                  |
| gnl UG Hs#S1569567  | 1.89 | 2 94-121(1.43) 159-184(1.89)                                                                                                                                                                 |
| gnl UG Hs#S15631438 | 3.14 | 9 150-175(2.11) 863-890(0.36) 1474-1500(2.31) 1667-1692(1.14) 2034-2060(0.50) 2074-2100(3.14) 2175-2199(2.04) 2505-2528(2.43) 2722-2748(0.18)                                                |
| gnl UG Hs#S1728632  | 0.59 | 1 1227-1253(0.59)                                                                                                                                                                            |
| gnl UG Hs#S2293327  | 1.08 | 1 282-308(1.08)                                                                                                                                                                              |
| gnl UG Hs#S4819142  | 3.23 | 15 180-207(0.82) 384-412(1.49) 633-658(2.00) 793-815(0.52) 953-976(0.49) 1142-1167(0.74) 1342-1368(0.24) 1402-1427(2.26) 1546-1571(0.67) 1708-1734(3.23) 1834-1859(1.65) 2325-2350(1.72) 271 |
| gnl UG Hs#S2139894  | 1.94 | 1 147-172(1.94)                                                                                                                                                                              |
| gnl UG Hs#S1730251  | 2.98 | 2 24-49(2.72) 106-131(2.98)                                                                                                                                                                  |
| gnl UG Hs#S7110476  | 0.39 | 3 454-479(0.39) 840-865(0.08) 903-928(0.29)                                                                                                                                                  |
| gnl UG Hs#S1729224  | 6.65 | 1 62-87(6.65)                                                                                                                                                                                |
| gnl UG Hs#S3355588  | 0.08 | 1 577-601(0.08)                                                                                                                                                                              |
| gnl UG Hs#S1731427  | 1.76 | 2 1240-1267(0.40) 1810-1836(1.76)                                                                                                                                                            |
| gnl UG Hs#S4824914  | 0.07 | 1 1900-1925(0.07)                                                                                                                                                                            |
| gnl UG Hs#S3439168  | 0.26 | 1 941-967(0.26)                                                                                                                                                                              |
| gnl UG Hs#S4809885  | 0.07 | 1 263-286(0.07)                                                                                                                                                                              |
| gnl UG Hs#S2138876  | 3.69 | 1 52-78(3.69)                                                                                                                                                                                |
| gnl UG Hs#S1729394  | 3.73 | 2 385-410(3.73) 640-665(0.62)                                                                                                                                                                |
| gnl UG Hs#S3219498  | 2.11 | 2 488-515(0.34) 1717-1742(2.11)                                                                                                                                                              |
| gnl UG Hs#S4554650  | 1.5  | 3 227-251(0.08) 263-289(0.65) 311-337(1.50)                                                                                                                                                  |
| gnl UG Hs#S4630969  | 0.2  | 1 584-609(0.20)                                                                                                                                                                              |
| gnl UG Hs#S4545937  | 2.89 | 2 228-253(2.89) 459-485(1.66)                                                                                                                                                                |
| gnl UG Hs#S2139334  | 0.28 | 1 248-274(0.28)                                                                                                                                                                              |
| gnl UG Hs#S1728780  | 0.84 | 1 1-26(0.84)                                                                                                                                                                                 |
| gnl UG Hs#S1730880  | 4.33 | 2 510-538(0.72) 1142-1167(4.33)                                                                                                                                                              |
| gnl UG Hs#S4807562  | 2.44 | 4 52-77(1.61) 1265-1290(1.15) 1833-1859(2.44) 2067-2092(0.67)                                                                                                                                |
| gnl UG Hs#S1728089  | 0.08 | 1 120-143(0.08)                                                                                                                                                                              |
| gnl UG Hs#S2293356  | 3.66 | 5 137-162(0.07) 304-332(3.66) 446-472(0.49) 560-585(0.84) 906-932(0.05)                                                                                                                      |
| gnl UG Hs#S11046598 | 4.34 | 15 586-612(4.34) 1316-1343(0.63) 1405-1431(3.41) 2563-2588(1.40) 2683-2711(0.39) 3123-3148(2.43) 3325-3351(0.13) 3438-3463(0.43) 4087-4113(3.30) 4216-4241(1.84) 4593-4619(1.34) 4884-4906   |
| gnl UG Hs#S2139764  | 2.3  | 3 48-73(2.30) 160-185(1.33) 191-216(1.16)                                                                                                                                                    |
| gnl UG Hs#S7111732  | 4.82 | 4 408-433(4.82) 376-402(0.94) 1225-1250(3.40) 2083-2109(3.18)                                                                                                                                |
| gnl UG Hs#S2139959  | 1.04 | 1 17-43(1.04)                                                                                                                                                                                |
| gnl UG Hs#S4841540  | 2.04 | 1 41-66(2.04)                                                                                                                                                                                |
| gnl UG Hs#S2139537  | 2.18 | 3 647-674(0.43) 1116-1142(2.18) 1732-1757(0.46)                                                                                                                                              |
| gnl UG Hs#S4823761  | 0.08 | 1 780-808(0.08)                                                                                                                                                                              |
| gnl UG Hs#S1730791  | 2.88 | 5 337-362(0.58) 1130-1155(0.76) 2080-2106(0.91) 2434-2461(2.88) 3135-3161(0.91)                                                                                                              |
| gnl UG Hs#S2139423  | 3.3  | 1 3558-3583(3.30)                                                                                                                                                                            |
| gnl UG Hs#S377      | 1.89 | 3 662-687(0.20) 800-827(1.89) 850-875(0.66)                                                                                                                                                  |
| gnl UG Hs#S5495051  | 0.23 | 1 54-77(0.23)                                                                                                                                                                                |
| gnl UG Hs#S2139644  | 3.2  | 4 253-280(0.03) 1232-1258(0.17) 3647-3675(0.52) 4875-4900(3.20)                                                                                                                              |
| gnl UG Hs#S7111628  | 1.2  | 1 1878-1904(1.20)                                                                                                                                                                            |
| gnl UG Hs#S4046154  | 1.79 | 5 403-429(0.43) 1296-1323(0.23) 1364-1389(0.26) 1424-1449(1.79) 1631-1656(1.07)                                                                                                              |
| gnl UG Hs#S14272719 | 3.6  | 3 1259-1287(0.75) 1405-1427(0.16) 2046-2072(3.60)                                                                                                                                            |
| gnl UG Hs#S1731061  | 1.53 | 2 18-43(1.20) 45-70(1.53)                                                                                                                                                                    |
| gnl UG Hs#S4807526  | 0.84 | 2 40-66(0.84) 188-213(0.20)                                                                                                                                                                  |
| gnl UG Hs#S1730476  | 0.17 | 1 355-380(0.17)                                                                                                                                                                              |
| gnl UG Hs#S3219094  | 2.26 | 1 185-210(2.26)                                                                                                                                                                              |
| gnl UG Hs#S2139014  | 0.23 | 1 303-329(0.23)                                                                                                                                                                              |
| gnl UG Hs#S4554614  | 1.68 | 1 118-143(1.68)                                                                                                                                                                              |
| gnl UG Hs#S1729097  | 2.13 | 1 719-744(2.13)                                                                                                                                                                              |
| gnl UG Hs#S4621033  | 1.13 | 3 571-596(0.97) 1914-1943(0.74) 2100-2125(1.13)                                                                                                                                              |
| gnl UG Hs#S3601707  | 0.04 | 2 259-287(0.04) 325-353(0.04)                                                                                                                                                                |
| gnl UG Hs#S1731413  | 0.5  | 1 89-114(0.50)                                                                                                                                                                               |

|                     |      |    |                                                                                                                                                                                           |
|---------------------|------|----|-------------------------------------------------------------------------------------------------------------------------------------------------------------------------------------------|
| gnl UG Hs#S4614384  | 1.2  | 1  | 350-378(1.20)                                                                                                                                                                             |
| gnl UG Hs#S2293408  | 1.18 | 6  | 543-571(0.49) 1000-1025(0.23) 1465-1488(1.18) 1515-1540(0.98) 1557-1584(0.43) 1663-1690(0.10)                                                                                             |
| gnl UG Hs#S4817839  | 2.4  | 4  | 270-293(1.43) 1085-1110(0.62) 1152-1177(2.40) 1835-1860(0.72)                                                                                                                             |
| gnl UG Hs#S4631499  | 0.2  | 1  | 580-608(0.20)                                                                                                                                                                             |
| gnl UG Hs#S15633566 | 2.08 | 2  | 485-511(0.40) 1632-1660(2.08)                                                                                                                                                             |
| gnl UG Hs#S4045765  | 0.5  | 2  | 40-66(0.50) 359-385(0.26)                                                                                                                                                                 |
| gnl UG Hs#S4554541  | 3.85 | 2  | 303-328(3.85) 361-385(0.49)                                                                                                                                                               |
| gnl UG Hs#S2293956  | 2.62 | 4  | 276-302(0.89) 784-812(1.33) 870-895(2.62) 1261-1287(1.00)                                                                                                                                 |
| gnl UG Hs#S4615708  | 0.17 | 1  | 1520-1545(0.17)                                                                                                                                                                           |
| gnl UG Hs#S4283951  | 3.43 | 1  | 460-486(3.43)                                                                                                                                                                             |
| gnl UG Hs#S2139988  | 3.04 | 2  | 620-645(1.53) 734-759(3.04)                                                                                                                                                               |
| gnl UG Hs#S2293278  | 2.43 | 2  | 600-626(0.04) 904-932(2.43)                                                                                                                                                               |
| gnl UG Hs#S15636059 | 2.72 | 2  | 1740-1764(2.72) 1930-1956(2.72)                                                                                                                                                           |
| gnl UG Hs#S10832694 | 0.2  | 1  | 73-101(0.20)                                                                                                                                                                              |
| gnl UG Hs#S1728918  | 1.72 | 1  | 83-108(1.72)                                                                                                                                                                              |
| gnl UG Hs#S4823007  | 1.84 | 2  | 222-248(1.62) 845-871(1.84)                                                                                                                                                               |
| gnl UG Hs#S1729583  | 1.67 | 1  | 611-636(1.67)                                                                                                                                                                             |
| gnl UG Hs#S4821098  | 3.66 | 3  | 45-71(0.10) 1441-1467(3.66) 1719-1745(2.40)                                                                                                                                               |
| gnl UG Hs#S3973049  | 8.2  | 9  | 74-102(3.03) 43-68(0.23) 244-270(2.60) 916-941(4.96) 1165-1190(1.21) 1531-1554(1.10) 1742-1770(8.20) 1974-2003(0.30) 2426-2454(0.02)                                                      |
| gnl UG Hs#S3905631  | 1.24 | 2  | 79-104(1.24) 1045-1073(0.85)                                                                                                                                                              |
| gnl UG Hs#S2294483  | 0.37 | 1  | 2211-2236(0.37)                                                                                                                                                                           |
| gnl UG Hs#S1729226  | 0.12 | 1  | 261-287(0.12)                                                                                                                                                                             |
| gnl UG Hs#S15115733 | 0.04 | 1  | 641-669(0.04)                                                                                                                                                                             |
| gnl UG Hs#S2293506  | 5.72 | 1  | 38-63(5.72)                                                                                                                                                                               |
| gnl UG Hs#S5978427  | 0.16 | 1  | 200-225(0.16)                                                                                                                                                                             |
| gnl UG Hs#S12743854 | 0.79 | 3  | 738-764(0.30) 873-898(0.72) 903-929(0.79)                                                                                                                                                 |
| gnl UG Hs#S6158968  | 2.78 | 6  | 638-666(0.47) 1026-1055(0.27) 1990-2015(1.43) 2139-2164(2.78) 2177-2202(2.52) 2301-2327(0.43)                                                                                             |
| gnl UG Hs#S2293385  | 1.87 | 3  | 192-217(0.01) 1266-1292(0.72) 1430-1455(1.87)                                                                                                                                             |
| gnl UG Hs#S5978443  | 4.08 | 3  | 172-198(4.08) 272-297(0.17) 979-1007(2.81)                                                                                                                                                |
| gnl UG Hs#S14802360 | 1.66 | 1  | 254-282(1.66)                                                                                                                                                                             |
| gnl UG Hs#S2139961  | 2.38 | 1  | 202-227(2.38)                                                                                                                                                                             |
| gnl UG Hs#S1729971  | 0.48 | 2  | 1489-1514(0.08) 1545-1570(0.48)                                                                                                                                                           |
| gnl UG Hs#S10832039 | 0.71 | 1  | 69-95(0.71)                                                                                                                                                                               |
| gnl UG Hs#S2139746  | 1.98 | 1  | 834-860(1.98)                                                                                                                                                                             |
| gnl UG Hs#S3542648  | 0.4  | 1  | 458-484(0.40)                                                                                                                                                                             |
| gnl UG Hs#S3881173  | 0.98 | 1  | 803-828(0.98)                                                                                                                                                                             |
| gnl UG Hs#S2139234  | 1.65 | 2  | 272-297(0.20) 359-384(1.65)                                                                                                                                                               |
| gnl UG Hs#S15638173 | 1.23 | 1  | 448-472(1.23)                                                                                                                                                                             |
| gnl UG Hs#S3438339  | 4.2  | 8  | 264-290(0.40) 300-326(0.57) 808-833(0.18) 932-957(0.74) 1202-1227(0.84) 1268-1293(2.17) 3107-3131(4.20) 3168-3193(2.98)                                                                   |
| gnl UG Hs#S1728141  | 0.04 | 1  | 73-101(0.04)                                                                                                                                                                              |
| gnl UG Hs#S12743763 | 2.23 | 1  | 483-509(2.23)                                                                                                                                                                             |
| gnl UG Hs#S1731332  | 1.39 | 4  | 265-290(1.39) 1163-1188(1.22) 1342-1367(0.05) 1383-1408(0.05)                                                                                                                             |
| gnl UG Hs#S15640916 | 2.08 | 2  | 909-935(2.08) 969-994(0.48)                                                                                                                                                               |
| gnl UG Hs#S4824311  | 4.34 | 8  | 886-913(0.75) 1268-1296(0.03) 1762-1787(0.30) 1804-1830(3.01) 1851-1877(4.34) 1894-1918(3.62) 1933-1959(1.43) 2411-2437(2.01)                                                             |
| gnl UG Hs#S5979227  | 2.31 | 1  | 299-322(2.31)                                                                                                                                                                             |
| gnl UG Hs#S3803693  | 3.53 | 3  | 293-318(3.53) 348-374(0.17) 593-618(1.13)                                                                                                                                                 |
| gnl UG Hs#S2293655  | 2.82 | 1  | 432-457(2.82)                                                                                                                                                                             |
| gnl UG Hs#S1731016  | 0.55 | 1  | 278-303(0.55)                                                                                                                                                                             |
| gnl UG Hs#S1731057  | 3.3  | 4  | 11-37(3.30) 57-80(0.36) 154-180(2.23) 210-235(1.72)                                                                                                                                       |
| gnl UG Hs#S1727617  | 0.98 | 2  | 794-819(0.55) 909-934(0.98)                                                                                                                                                               |
| gnl UG Hs#S15641760 | 3.62 | 13 | 51-77(2.43) 85-110(2.82) 338-363(1.76) 435-460(1.89) 474-499(3.62) 1046-1071(0.14) 1296-1322(0.59) 1434-1459(0.17) 1955-1983(0.81) 2175-2200(0.94) 2231-2257(0.11) 2362-2390(0.49) 2972-3 |
| gnl UG Hs#S1726696  | 0.8  | 1  | 1109-1137(0.80)                                                                                                                                                                           |
| gnl UG Hs#S5979254  | 1.5  | 7  | 478-505(0.26) 589-614(0.58) 2882-2908(0.17) 2979-3007(0.68) 3130-3159(1.50) 4021-4046(1.30) 4303-4328(0.04)                                                                               |
| gnl UG Hs#S3218957  | 2.82 | 1  | 1490-1515(2.82)                                                                                                                                                                           |

|                     |      |    |                                                                                                                                                                                         |
|---------------------|------|----|-----------------------------------------------------------------------------------------------------------------------------------------------------------------------------------------|
| gnl UG Hs#S2294375  | 0.94 | 1  | 440-465(0.94)                                                                                                                                                                           |
| gnl UG Hs#S2139650  | 3.78 | 5  | 19-44(1.98) 1305-1331(3.78) 1697-1725(0.16) 2345-2370(0.79) 2387-2413(1.50)                                                                                                             |
| gnl UG Hs#S1729712  | 2.46 | 3  | 129-155(1.92) 305-331(0.62) 601-626(2.46)                                                                                                                                               |
| gnl UG Hs#S3601864  | 0.83 | 1  | 797-823(0.83)                                                                                                                                                                           |
| gnl UG Hs#S10832338 | 2.65 | 2  | 285-310(2.65) 436-461(0.82)                                                                                                                                                             |
| gnl UG Hs#S1731399  | 1.91 | 2  | 840-866(1.91) 1011-1036(0.30)                                                                                                                                                           |
| gnl UG Hs#S15633046 | 3.27 | 9  | 875-901(0.10) 965-991(2.72) 1103-1131(0.81) 1891-1917(3.27) 1981-2006(1.67) 2588-2613(2.36) 2956-2984(0.40) 3004-3029(1.23) 3201-3227(0.82)                                             |
| gnl UG Hs#S3973033  | 1.58 | 1  | 95-120(1.58)                                                                                                                                                                            |
| gnl UG Hs#S1824468  | 2.99 | 1  | 663-689(2.99)                                                                                                                                                                           |
| gnl UG Hs#S7113176  | 1.53 | 1  | 433-458(1.53)                                                                                                                                                                           |
| gnl UG Hs#S4814693  | 3.46 | 5  | 145-170(0.85) 729-754(3.46) 939-964(0.30) 1044-1071(0.42) 2611-2636(2.75)                                                                                                               |
| gnl UG Hs#S1729592  | 1.98 | 2  | 200-225(1.98) 1035-1063(0.01)                                                                                                                                                           |
| gnl UG Hs#S15730252 | 2.29 | 3  | 471-498(2.29) 665-690(1.50) 843-868(0.27)                                                                                                                                               |
| gnl UG Hs#S3814684  | 2.46 | 3  | 114-141(1.43) 618-643(2.46) 676-704(1.40)                                                                                                                                               |
| gnl UG Hs#S4001822  | 0.3  | 2  | 738-764(0.24) 1959-1984(0.30)                                                                                                                                                           |
| gnl UG Hs#S1730924  | 3.07 | 2  | 32-57(3.07) 189-214(0.65)                                                                                                                                                               |
| gnl UG Hs#S4435606  | 0.52 | 1  | 195-219(0.52)                                                                                                                                                                           |
| gnl UG Hs#S1730944  | 0.4  | 1  | 205-231(0.40)                                                                                                                                                                           |
| gnl UG Hs#S1731993  | 4.23 | 12 | 110-138(3.15) 467-492(1.59) 501-527(0.08) 743-769(1.82) 1527-1553(0.67) 1804-1827(2.01) 2118-2144(4.23) 3502-3530(0.30) 4340-4366(3.08) 4542-4566(0.08) 4953-4977(1.20) 5206-5234(0.30) |
| gnl UG Hs#S3603195  | 1.17 | 1  | 308-333(1.17)                                                                                                                                                                           |
| gnl UG Hs#S3219376  | 1.15 | 1  | 654-679(1.15)                                                                                                                                                                           |
| gnl UG Hs#S3602311  | 1.82 | 1  | 64-90(1.82)                                                                                                                                                                             |
| gnl UG Hs#S3880833  | 1.49 | 2  | 282-305(1.49) 335-360(0.72)                                                                                                                                                             |
| gnl UG Hs#S1729859  | 1.91 | 7  | 520-545(0.23) 893-918(0.72) 1668-1693(1.11) 1736-1762(1.91) 2270-2298(0.23) 2755-2780(0.40) 3522-3547(1.30)                                                                             |
| gnl UG Hs#S1727869  | 0.23 | 1  | 114-140(0.23)                                                                                                                                                                           |
| gnl UG Hs#S4807877  | 1.24 | 5  | 16-41(0.20) 684-709(0.72) 953-978(0.72) 1018-1046(0.88) 1628-1653(1.24)                                                                                                                 |
| gnl UG Hs#S3619312  | 2.29 | 5  | 14-40(1.92) 638-665(2.29) 976-1002(1.20) 1816-1841(1.43) 2252-2277(0.07)                                                                                                                |
| gnl UG Hs#S3218885  | 1.27 | 1  | 1524-1550(1.27)                                                                                                                                                                         |
| gnl UG Hs#S3973013  | 1.33 | 4  | 300-326(0.36) 342-368(0.82) 574-597(0.36) 1127-1152(1.33)                                                                                                                               |
| gnl UG Hs#S1729408  | 1.13 | 1  | 579-604(1.13)                                                                                                                                                                           |
| gnl UG Hs#S1727634  | 2.79 | 2  | 520-548(1.62) 1637-1662(2.79)                                                                                                                                                           |
| gnl UG Hs#S1726642  | 2.3  | 4  | 65-90(2.30) 1027-1052(0.72) 1316-1344(1.27) 2589-2615(0.23)                                                                                                                             |
| gnl UG Hs#S1730021  | 1.33 | 1  | 1541-1566(1.33)                                                                                                                                                                         |
| gnl UG Hs#S3438518  | 0.2  | 1  | 1633-1658(0.20)                                                                                                                                                                         |
| gnl UG Hs#S3219417  | 3.49 | 10 | 163-191(0.39) 309-335(1.01) 503-528(0.11) 1254-1279(0.26) 1398-1423(1.89) 1654-1679(3.49) 2073-2098(0.33) 2551-2577(1.40) 2943-2968(0.14) 3183-3207(2.97)                               |
| gnl UG Hs#S3803736  | 5.56 | 3  | 30-57(1.82) 178-204(1.58) 222-248(5.56)                                                                                                                                                 |
| gnl UG Hs#S4807709  | 3.76 | 1  | 107-132(3.76)                                                                                                                                                                           |
| gnl UG Hs#S2294528  | 5.04 | 5  | 441-466(5.04) 1268-1294(0.11) 1418-1447(0.46) 1982-2007(0.55) 2554-2580(1.14)                                                                                                           |
| gnl UG Hs#S1728888  | 0.08 | 1  | 152-180(0.08)                                                                                                                                                                           |
| gnl UG Hs#S2294251  | 0.08 | 1  | 91-116(0.08)                                                                                                                                                                            |
| gnl UG Hs#S2294211  | 6.18 | 1  | 1899-1925(6.18)                                                                                                                                                                         |
| gnl UG Hs#S2293492  | 0.49 | 2  | 684-710(0.49) 886-911(0.26)                                                                                                                                                             |
| gnl UG Hs#S4615220  | 3.08 | 1  | 2168-2193(3.08)                                                                                                                                                                         |
| gnl UG Hs#S3619277  | 1.72 | 1  | 1202-1225(1.72)                                                                                                                                                                         |
| gnl UG Hs#S5930960  | 0.26 | 1  | 915-940(0.26)                                                                                                                                                                           |
| gnl UG Hs#S4807842  | 2.05 | 3  | 350-378(2.05) 488-516(0.72) 743-768(1.58)                                                                                                                                               |
| gnl UG Hs#S1729852  | 4.7  | 1  | 128-153(4.70)                                                                                                                                                                           |
| gnl UG Hs#S1731004  | 0.36 | 1  | 551-576(0.36)                                                                                                                                                                           |
| gnl UG Hs#S3355626  | 0.26 | 1  | 127-152(0.26)                                                                                                                                                                           |
| gnl UG Hs#S1728949  | 0.57 | 1  | 211-237(0.57)                                                                                                                                                                           |
| gnl UG Hs#S3219658  | 3.9  | 3  | 817-842(3.90) 1448-1474(0.11) 1575-1600(0.17)                                                                                                                                           |
| gnl UG Hs#S4285361  | 4.8  | 10 | 45-71(0.40) 307-333(1.77) 1850-1878(0.23) 2830-2854(4.80) 3222-3249(0.18) 3261-3287(0.08) 3548-3573(1.46) 4461-4486(1.20) 4773-4798(1.59) 5268-5294(0.10)                               |
| gnl UG Hs#S2140422  | 1.76 | 1  | 324-350(1.76)                                                                                                                                                                           |
| gnl UG Hs#S1731657  | 3.02 | 1  | 188-214(3.02)                                                                                                                                                                           |

|                     |      |                                                                                                   |
|---------------------|------|---------------------------------------------------------------------------------------------------|
| gnl UG Hs#S3601490  | 3.3  | 1 232-257(3.30)                                                                                   |
| gnl UG Hs#S1729115  | 2.9  | 1 339-364(2.90)                                                                                   |
| gnl UG Hs#S1727921  | 3.65 | 1 106-133(3.65)                                                                                   |
| gnl UG Hs#S1730268  | 3.66 | 1 25-51(3.66)                                                                                     |
| gnl UG Hs#S4817328  | 1.08 | 3 528-553(0.17) 710-735(0.36) 1419-1444(1.08)                                                     |
| gnl UG Hs#S1730364  | 1.4  | 1 1023-1048(1.40)                                                                                 |
| gnl UG Hs#S3219775  | 0.08 | 1 422-447(0.08)                                                                                   |
| gnl UG Hs#S1732353  | 1.58 | 3 209-237(0.53) 785-811(1.22) 1174-1199(1.58)                                                     |
| gnl UG Hs#S5930959  | 3.59 | 1 970-996(3.59)                                                                                   |
| gnl UG Hs#S2294243  | 3.23 | 3 483-509(3.23) 1190-1218(1.00) 1501-1526(1.78)                                                   |
| gnl UG Hs#S5931239  | 3.4  | 3 773-799(1.62) 1094-1119(3.40) 1338-1366(0.43)                                                   |
| gnl UG Hs#S15642843 | 0.3  | 3 244-271(0.17) 565-591(0.01) 645-671(0.30)                                                       |
| gnl UG Hs#S3992197  | 4.79 | 1 326-351(4.79)                                                                                   |
| gnl UG Hs#S11046666 | 4.3  | 2 246-272(4.30) 296-322(2.18)                                                                     |
| gnl UG Hs#S4284312  | 0.78 | 1 2014-2039(0.78)                                                                                 |
| gnl UG Hs#S2293643  | 3.89 | 4 706-731(3.89) 773-799(2.76) 1369-1394(1.36) 1633-1657(1.14)                                     |
| gnl UG Hs#S4822359  | 1.82 | 1 1935-1960(1.82)                                                                                 |
| gnl UG Hs#S4817010  | 3.14 | 6 449-475(0.94) 1589-1614(1.62) 2241-2267(0.23) 2527-2552(0.17) 2895-2923(1.01) 4024-4050(3.14)   |
| gnl UG Hs#S3619351  | 1.62 | 1 54-79(1.62)                                                                                     |
| gnl UG Hs#S15115576 | 3.13 | 5 728-757(1.84) 851-876(1.52) 959-984(3.13) 1278-1303(1.58) 1850-1877(1.24)                       |
| gnl UG Hs#S1728827  | 2.25 | 6 2043-2071(2.25) 2130-2155(0.85) 2186-2212(0.13) 2319-2344(0.40) 2443-2468(0.46) 2567-2595(0.49) |
| gnl UG Hs#S1727290  | 0.2  | 1 364-388(0.20)                                                                                   |
| gnl UG Hs#S5978801  | 1.94 | 2 198-224(1.94) 285-310(0.84)                                                                     |
| gnl UG Hs#S1727007  | 1.68 | 1 552-580(1.68)                                                                                   |
| gnl UG Hs#S15730308 | 1.17 | 2 1207-1232(1.17) 1307-1332(0.40)                                                                 |
| gnl UG Hs#S4810978  | 0.52 | 1 2153-2177(0.52)                                                                                 |
| gnl UG Hs#S2138690  | 3.03 | 2 222-248(0.36) 630-658(3.03)                                                                     |
| gnl UG Hs#S1727650  | 1.66 | 2 736-763(1.66) 804-832(0.04)                                                                     |
| gnl UG Hs#S2293456  | 1.39 | 3 281-306(0.39) 767-792(1.39) 814-844(0.91)                                                       |
| gnl UG Hs#S5978560  | 1.37 | 1 3-30(1.37)                                                                                      |
| gnl UG Hs#S2139279  | 2.12 | 2 108-133(2.12) 332-357(0.65)                                                                     |
| gnl UG Hs#S1729374  | 0.97 | 2 1937-1962(0.30) 2352-2377(0.97)                                                                 |
| gnl UG Hs#S1730258  | 1.4  | 1 39-67(1.40)                                                                                     |
| gnl UG Hs#S4821568  | 3.48 | 1 335-359(3.48)                                                                                   |
| gnl UG Hs#S4827921  | 0.01 | 1 649-675(0.01)                                                                                   |
| gnl UG Hs#S1729479  | 1.13 | 3 29-54(0.76) 177-203(0.01) 204-229(1.13)                                                         |
| gnl UG Hs#S4807643  | 0.58 | 1 12-38(0.58)                                                                                     |
| gnl UG Hs#S11046700 | 0.23 | 1 79-104(0.23)                                                                                    |
| gnl UG Hs#S1732003  | 1.07 | 1 1890-1918(1.07)                                                                                 |
| gnl UG Hs#S15633166 | 0.33 | 1 728-753(0.33)                                                                                   |
| gnl UG Hs#S2649484  | 0.5  | 1 554-580(0.50)                                                                                   |
| gnl UG Hs#S4285064  | 2.08 | 4 271-296(1.24) 424-449(1.11) 653-678(0.23) 716-741(2.08)                                         |
| gnl UG Hs#S2293591  | 0.5  | 2 439-464(0.40) 864-889(0.50)                                                                     |
| gnl UG Hs#S4807653  | 0.23 | 1 392-417(0.23)                                                                                   |
| gnl UG Hs#S1569523  | 1.72 | 1 1558-1584(1.72)                                                                                 |
| gnl UG Hs#S2140635  | 0.76 | 2 688-714(0.03) 1150-1175(0.76)                                                                   |
| gnl UG Hs#S1730382  | 4.45 | 6 142-168(0.36) 225-250(0.65) 547-573(2.30) 745-770(4.45) 1432-1457(4.43) 1813-1838(0.50)         |
| gnl UG Hs#S3219997  | 0.8  | 2 1598-1623(0.08) 1749-1774(0.80)                                                                 |
| gnl UG Hs#S1728596  | 2.3  | 4 95-120(0.91) 201-226(0.82) 539-564(1.30) 1645-1670(2.30)                                        |
| gnl UG Hs#S1729105  | 0.29 | 1 1436-1463(0.29)                                                                                 |
| gnl UG Hs#S1824270  | 0.59 | 2 420-445(0.48) 1444-1471(0.59)                                                                   |
| gnl UG Hs#S4807832  | 1.88 | 1 174-202(1.88)                                                                                   |
| gnl UG Hs#S15631447 | 0.21 | 1 447-473(0.21)                                                                                   |
| gnl UG Hs#S1730823  | 2.15 | 1 140-166(2.15)                                                                                   |

|                     |      |   |                                                                                                                           |
|---------------------|------|---|---------------------------------------------------------------------------------------------------------------------------|
| gnl UG Hs#S1731624  | 0.66 | 1 | 195-220(0.66)                                                                                                             |
| gnl UG Hs#S14273293 | 1.4  | 1 | 140-165(1.40)                                                                                                             |
| gnl UG Hs#S2293940  | 0.66 | 1 | 726-753(0.66)                                                                                                             |
| gnl UG Hs#S2139850  | 3.14 | 1 | 279-305(3.14)                                                                                                             |
| gnl UG Hs#S1728443  | 0.58 | 2 | 81-106(0.58) 224-250(0.11)                                                                                                |
| gnl UG Hs#S2139674  | 7.92 | 6 | 395-421(1.27) 808-834(0.23) 890-916(0.50) 1688-1717(1.63) 2424-2449(7.92) 2919-2945(0.04)                                 |
| gnl UG Hs#S5978480  | 0.3  | 1 | 269-297(0.30)                                                                                                             |
| gnl UG Hs#S3439655  | 3.53 | 2 | 186-211(3.53) 476-500(0.56)                                                                                               |
| gnl UG Hs#S5517671  | 1.49 | 1 | 81-109(1.49)                                                                                                              |
| gnl UG Hs#S4435336  | 5.15 | 2 | 1143-1169(0.52) 1411-1436(5.15)                                                                                           |
| gnl UG Hs#S4554433  | 1.19 | 2 | 1163-1188(0.13) 1287-1312(1.19)                                                                                           |
| gnl UG Hs#S3988451  | 3.04 | 1 | 116-141(3.04)                                                                                                             |
| gnl UG Hs#S3619727  | 0.36 | 1 | 258-282(0.36)                                                                                                             |
| gnl UG Hs#S3437796  | 0.49 | 1 | 35-61(0.49)                                                                                                               |
| gnl UG Hs#S3355473  | 5.27 | 1 | 375-401(5.27)                                                                                                             |
| gnl UG Hs#S1824533  | 2.25 | 3 | 29-53(2.25) 1316-1339(0.36) 1594-1619(2.13)                                                                               |
| gnl UG Hs#S15631432 | 4.16 | 2 | 703-729(4.16) 933-959(0.01)                                                                                               |
| gnl UG Hs#S4283950  | 3.46 | 3 | 7-32(3.30) 142-169(3.46) 181-208(2.15)                                                                                    |
| gnl UG Hs#S3825997  | 3.26 | 1 | 287-312(3.26)                                                                                                             |
| gnl UG Hs#S1727086  | 1.99 | 4 | 1056-1081(0.58) 1145-1173(0.04) 1230-1255(1.99) 2354-2382(0.71)                                                           |
| gnl UG Hs#S1728688  | 3.88 | 3 | 374-401(3.30) 622-646(0.52) 1166-1193(3.88)                                                                               |
| gnl UG Hs#S1729968  | 0.33 | 2 | 10-35(0.04) 615-641(0.33)                                                                                                 |
| gnl UG Hs#S4614464  | 2.23 | 2 | 461-486(0.53) 778-803(2.23)                                                                                               |
| gnl UG Hs#S2293372  | 1.17 | 1 | 236-262(1.17)                                                                                                             |
| gnl UG Hs#S2139589  | 1.43 | 2 | 173-199(1.43) 215-240(0.20)                                                                                               |
| gnl UG Hs#S3355610  | 1.62 | 2 | 835-864(1.62) 977-1005(0.60)                                                                                              |
| gnl UG Hs#S3219709  | 1.88 | 2 | 74-99(1.88) 539-564(0.53)                                                                                                 |
| gnl UG Hs#S4807612  | 0.72 | 1 | 1046-1071(0.72)                                                                                                           |
| gnl UG Hs#S2139532  | 5.14 | 8 | 281-308(1.74) 316-341(5.14) 737-762(0.30) 1513-1539(0.18) 1711-1736(0.53) 1837-1863(2.89) 1965-1988(0.86) 2215-2240(3.04) |
| gnl UG Hs#S4435722  | 1.82 | 2 | 34-59(1.82) 511-536(0.34)                                                                                                 |
| gnl UG Hs#S5978467  | 2.79 | 1 | 138-163(2.79)                                                                                                             |
| gnl UG Hs#S4436246  | 1.76 | 2 | 166-193(0.10) 488-514(1.76)                                                                                               |
| gnl UG Hs#S1732428  | 0.48 | 1 | 8-33(0.48)                                                                                                                |
| gnl UG Hs#S4631014  | 0.29 | 1 | 879-904(0.29)                                                                                                             |
| gnl UG Hs#S1727297  | 1.04 | 2 | 225-251(0.34) 283-309(1.04)                                                                                               |
| gnl UG Hs#S1726506  | 1.04 | 1 | 117-141(1.04)                                                                                                             |
| gnl UG Hs#S2138916  | 2.2  | 1 | 84-109(2.20)                                                                                                              |
| gnl UG Hs#S4044957  | 2.66 | 4 | 33-57(2.66) 98-124(1.33) 451-476(0.85) 633-658(1.82)                                                                      |
| gnl UG Hs#S3438996  | 1.89 | 2 | 1476-1501(0.17) 1772-1797(1.89)                                                                                           |
| gnl UG Hs#S5978598  | 0.57 | 1 | 872-897(0.57)                                                                                                             |
| gnl UG Hs#S3438991  | 0.07 | 1 | 988-1013(0.07)                                                                                                            |
| gnl UG Hs#S3219231  | 1.97 | 3 | 1616-1641(0.80) 1994-2019(0.09) 2748-2773(1.97)                                                                           |
| gnl UG Hs#S3988372  | 1.24 | 2 | 1186-1211(0.91) 1793-1818(1.24)                                                                                           |
| gnl UG Hs#S7111036  | 2.79 | 3 | 1410-1435(0.46) 1739-1764(1.59) 4079-4104(2.79)                                                                           |
| gnl UG Hs#S2139029  | 0.01 | 1 | 486-511(0.01)                                                                                                             |
| gnl UG Hs#S3989293  | 1.56 | 1 | 163-190(1.56)                                                                                                             |
| gnl UG Hs#S3355560  | 1.17 | 4 | 55-83(0.98) 134-159(0.82) 675-700(1.17) 893-918(0.23)                                                                     |
| gnl UG Hs#S11062784 | 0.94 | 2 | 1161-1187(0.94) 2373-2398(0.76)                                                                                           |
| gnl UG Hs#S4002089  | 3.97 | 2 | 26-51(2.20) 166-191(3.97)                                                                                                 |
| gnl UG Hs#S5978499  | 2.34 | 2 | 754-780(0.55) 3060-3086(2.34)                                                                                             |
| gnl UG Hs#S10832089 | 0.13 | 1 | 219-245(0.13)                                                                                                             |
| gnl UG Hs#S3817891  | 1.07 | 1 | 429-457(1.07)                                                                                                             |
| gnl UG Hs#S1727021  | 1.23 | 4 | 71-96(0.14) 166-191(0.58) 219-245(1.23) 302-330(0.37)                                                                     |
| gnl UG Hs#S1731164  | 1.01 | 1 | 163-189(1.01)                                                                                                             |

|                     |      |   |                                                                                                                         |
|---------------------|------|---|-------------------------------------------------------------------------------------------------------------------------|
| gnl UG Hs#S1730103  | 1.13 | 2 | 1175-1200(1.13) 1207-1235(0.52)                                                                                         |
| gnl UG Hs#S1726227  | 2.67 | 3 | 278-306(1.14) 411-437(0.62) 787-812(2.67)                                                                               |
| gnl UG Hs#S6158759  | 4.26 | 3 | 62-85(0.47) 1061-1086(4.26) 1306-1332(0.17)                                                                             |
| gnl UG Hs#S2139625  | 2.26 | 3 | 14-39(2.02) 334-359(0.17) 1490-1517(2.26)                                                                               |
| gnl UG Hs#S4545974  | 1.89 | 2 | 558-583(1.89) 744-769(1.49)                                                                                             |
| gnl UG Hs#S4631258  | 0.76 | 2 | 713-738(0.39) 1288-1314(0.76)                                                                                           |
| gnl UG Hs#S2139460  | 1.98 | 3 | 1717-1742(0.32) 1959-1984(1.98) 2183-2208(0.58)                                                                         |
| gnl UG Hs#S1728939  | 2.36 | 4 | 211-237(0.53) 424-449(2.36) 755-783(0.27) 1103-1128(2.31)                                                               |
| gnl UG Hs#S1728189  | 2.72 | 2 | 658-683(2.72) 844-872(1.16)                                                                                             |
| gnl UG Hs#S2139169  | 2.17 | 1 | 446-472(2.17)                                                                                                           |
| gnl UG Hs#S2140627  | 0.5  | 2 | 131-157(0.50) 182-208(0.49)                                                                                             |
| gnl UG Hs#S14802374 | 1.74 | 3 | 743-768(0.07) 775-802(1.74) 823-849(0.50)                                                                               |
| gnl UG Hs#S3437937  | 1.72 | 2 | 207-232(0.28) 1100-1125(1.72)                                                                                           |
| gnl UG Hs#S3601758  | 2.48 | 2 | 553-581(0.30) 1432-1457(2.48)                                                                                           |
| gnl UG Hs#S1824568  | 1.42 | 2 | 667-693(1.37) 910-938(1.42)                                                                                             |
| gnl UG Hs#S2140381  | 1.65 | 5 | 462-487(0.23) 588-613(1.65) 677-702(0.37) 2097-2123(0.14) 2683-2708(0.40)                                               |
| gnl UG Hs#S2139633  | 2.49 | 2 | 382-407(2.49) 476-504(0.44)                                                                                             |
| gnl UG Hs#S1728147  | 0.01 | 1 | 741-766(0.01)                                                                                                           |
| gnl UG Hs#S3355534  | 1.14 | 1 | 166-194(1.14)                                                                                                           |
| gnl UG Hs#S3219173  | 0.3  | 1 | 387-413(0.30)                                                                                                           |
| gnl UG Hs#S3439151  | 0.17 | 1 | 647-673(0.17)                                                                                                           |
| gnl UG Hs#S4435549  | 0.65 | 1 | 127-153(0.65)                                                                                                           |
| gnl UG Hs#S1728757  | 3.98 | 2 | 264-289(0.13) 348-373(3.98)                                                                                             |
| gnl UG Hs#S1824311  | 2.46 | 1 | 94-119(2.46)                                                                                                            |
| gnl UG Hs#S1730781  | 0.08 | 1 | 103-131(0.08)                                                                                                           |
| gnl UG Hs#S11046552 | 0.88 | 2 | 49-77(0.88) 437-463(0.02)                                                                                               |
| gnl UG Hs#S1730674  | 5.3  | 3 | 520-546(0.50) 672-698(5.30) 1232-1257(1.13)                                                                             |
| gnl UG Hs#S11046651 | 4.08 | 1 | 205-231(4.08)                                                                                                           |
| gnl UG Hs#S1729463  | 6.94 | 5 | 22-47(2.01) 103-128(6.94) 276-302(1.92) 744-769(0.17) 1505-1530(0.04)                                                   |
| gnl UG Hs#S1726691  | 1.13 | 1 | 684-709(1.13)                                                                                                           |
| gnl UG Hs#S1732158  | 9.97 | 1 | 371-396(9.97)                                                                                                           |
| gnl UG Hs#S3355640  | 0.76 | 1 | 50-75(0.76)                                                                                                             |
| gnl UG Hs#S1727468  | 3.62 | 2 | 216-241(3.62) 258-282(1.82)                                                                                             |
| gnl UG Hs#S3438955  | 0.1  | 1 | 1053-1079(0.10)                                                                                                         |
| gnl UG Hs#S4631404  | 0.82 | 1 | 169-194(0.82)                                                                                                           |
| gnl UG Hs#S10832364 | 1.79 | 1 | 13-38(1.79)                                                                                                             |
| gnl UG Hs#S3219967  | 3.79 | 1 | 575-600(3.79)                                                                                                           |
| gnl UG Hs#S2294388  | 2.21 | 1 | 875-900(2.21)                                                                                                           |
| gnl UG Hs#S1731785  | 5.72 | 2 | 147-172(5.72) 532-558(0.27)                                                                                             |
| gnl UG Hs#S3992174  | 2.69 | 1 | 2755-2780(2.69)                                                                                                         |
| gnl UG Hs#S3601645  | 0.17 | 1 | 57-82(0.17)                                                                                                             |
| gnl UG Hs#S3438561  | 0.84 | 1 | 621-646(0.84)                                                                                                           |
| gnl UG Hs#S5930885  | 6.47 | 1 | 1053-1078(6.47)                                                                                                         |
| gnl UG Hs#S4813977  | 2.36 | 3 | 1800-1825(1.72) 2054-2079(2.36) 2135-2161(0.75)                                                                         |
| gnl UG Hs#S1729615  | 1.79 | 1 | 1967-1992(1.79)                                                                                                         |
| gnl UG Hs#S14812661 | 0.23 | 1 | 745-771(0.23)                                                                                                           |
| gnl UG Hs#S4807679  | 3.5  | 8 | 499-524(3.16) 662-687(0.58) 734-761(0.33) 876-904(3.50) 1134-1159(2.70) 1247-1275(1.25) 2006-2034(2.40) 2273-2298(0.72) |
| gnl UG Hs#S3782091  | 3.86 | 1 | 195-221(3.86)                                                                                                           |
| gnl UG Hs#S3438800  | 4.49 | 2 | 97-122(4.49) 924-952(0.13)                                                                                              |
| gnl UG Hs#S2293585  | 0.14 | 1 | 755-780(0.14)                                                                                                           |
| gnl UG Hs#S14802369 | 4.53 | 1 | 44-70(4.53)                                                                                                             |
| gnl UG Hs#S5860354  | 0.11 | 1 | 1324-1349(0.11)                                                                                                         |
| gnl UG Hs#S2293307  | 1    | 2 | 278-303(1.00) 313-339(0.66)                                                                                             |
| gnl UG Hs#S1732288  | 1.95 | 6 | 316-341(1.95) 622-647(1.87) 708-736(1.15) 1517-1542(0.40) 2983-3008(0.07) 3269-3295(0.82)                               |

|                     |      |   |                                                                                                               |
|---------------------|------|---|---------------------------------------------------------------------------------------------------------------|
| gnl UG Hs#S2293575  | 5.11 | 1 | 408-433(5.11)                                                                                                 |
| gnl UG Hs#S1730863  | 3.2  | 3 | 247-272(2.26) 456-479(0.52) 1034-1059(3.20)                                                                   |
| gnl UG Hs#S1731750  | 1.13 | 2 | 1889-1916(0.97) 2285-2310(1.13)                                                                               |
| gnl UG Hs#S1728764  | 0.69 | 1 | 48-73(0.69)                                                                                                   |
| gnl UG Hs#S15636390 | 3.04 | 2 | 1230-1256(0.23) 2352-2377(3.04)                                                                               |
| gnl UG Hs#S2139013  | 0.66 | 1 | 830-858(0.66)                                                                                                 |
| gnl UG Hs#S1726948  | 0.94 | 6 | 1-25(0.04) 269-295(0.94) 450-476(0.69) 501-526(0.39) 926-954(0.42) 1013-1038(0.72)                            |
| gnl UG Hs#S4810855  | 3.08 | 1 | 1495-1521(3.08)                                                                                               |
| gnl UG Hs#S1726361  | 0.95 | 1 | 147-170(0.95)                                                                                                 |
| gnl UG Hs#S5860303  | 2.11 | 6 | 316-341(2.11) 1151-1176(1.94) 1201-1225(1.11) 1258-1283(1.40) 1347-1372(1.32) 1423-1451(1.07)                 |
| gnl UG Hs#S1971547  | 1.65 | 2 | 437-463(0.23) 1730-1756(1.65)                                                                                 |
| gnl UG Hs#S7112387  | 0.84 | 1 | 1886-1911(0.84)                                                                                               |
| gnl UG Hs#S15640509 | 0.98 | 3 | 769-795(0.17) 1067-1092(0.98) 1130-1155(0.75)                                                                 |
| gnl UG Hs#S4615502  | 1.36 | 2 | 528-553(1.36) 569-595(0.56)                                                                                   |
| gnl UG Hs#S3619258  | 1.56 | 2 | 227-252(1.56) 516-541(1.08)                                                                                   |
| gnl UG Hs#S1728929  | 1.88 | 4 | 107-135(1.88) 194-219(0.72) 463-487(0.04) 789-814(0.20)                                                       |
| gnl UG Hs#S4554591  | 0.33 | 1 | 860-885(0.33)                                                                                                 |
| gnl UG Hs#S4435803  | 1.62 | 3 | 1-26(0.08) 490-515(0.16) 636-659(1.62)                                                                        |
| gnl UG Hs#S5978810  | 1.07 | 4 | 772-797(1.07) 1434-1459(0.82) 1819-1847(0.08) 1858-1883(0.88)                                                 |
| gnl UG Hs#S2138763  | 0.53 | 1 | 122-148(0.53)                                                                                                 |
| gnl UG Hs#S10831865 | 5.58 | 1 | 1048-1073(5.58)                                                                                               |
| gnl UG Hs#S2293339  | 3.34 | 4 | 414-439(2.76) 476-502(3.34) 522-550(1.23) 557-582(1.53)                                                       |
| gnl UG Hs#S3438657  | 2.94 | 2 | 63-88(2.94) 622-647(0.07)                                                                                     |
| gnl UG Hs#S4815428  | 6.09 | 2 | 3212-3238(6.09) 3861-3887(0.02)                                                                               |
| gnl UG Hs#S4545836  | 0.4  | 1 | 524-549(0.40)                                                                                                 |
| gnl UG Hs#S4807585  | 0.01 | 1 | 49-77(0.01)                                                                                                   |
| gnl UG Hs#S3542667  | 0.98 | 2 | 897-925(0.75) 939-964(0.98)                                                                                   |
| gnl UG Hs#S1824573  | 3.88 | 4 | 1487-1512(0.72) 2023-2048(1.65) 2145-2170(1.04) 2353-2380(3.88)                                               |
| gnl UG Hs#S4824911  | 2.62 | 1 | 1026-1051(2.62)                                                                                               |
| gnl UG Hs#S2294673  | 1.23 | 2 | 22-47(0.23) 390-418(1.23)                                                                                     |
| gnl UG Hs#S1729958  | 0.56 | 1 | 481-506(0.56)                                                                                                 |
| gnl UG Hs#S4819647  | 2.94 | 7 | 838-864(1.34) 1368-1396(1.16) 1485-1512(1.20) 1513-1539(2.94) 2187-2212(0.43) 3687-3712(1.04) 3799-3828(0.05) |
| gnl UG Hs#S1729236  | 1.98 | 2 | 245-272(1.98) 2025-2052(0.00)                                                                                 |
| gnl UG Hs#S5517468  | 0.91 | 1 | 767-793(0.91)                                                                                                 |
| gnl UG Hs#S3333855  | 0.53 | 1 | 2555-2580(0.53)                                                                                               |
| gnl UG Hs#S3438432  | 0.19 | 1 | 591-616(0.19)                                                                                                 |
| gnl UG Hs#S15636761 | 3.03 | 3 | 638-665(1.95) 875-900(0.53) 1098-1123(3.03)                                                                   |
| gnl UG Hs#S4822342  | 3.52 | 1 | 4326-4351(3.52)                                                                                               |
| gnl UG Hs#S2140292  | 0.04 | 1 | 167-192(0.04)                                                                                                 |
| gnl UG Hs#S4283625  | 1.65 | 3 | 291-317(0.28) 594-620(1.65) 2885-2910(0.04)                                                                   |
| gnl UG Hs#S1726439  | 1.91 | 1 | 195-220(1.91)                                                                                                 |
| gnl UG Hs#S3973142  | 0.49 | 1 | 255-282(0.49)                                                                                                 |
| gnl UG Hs#S3940069  | 2.84 | 4 | 92-117(0.20) 190-217(0.92) 520-548(0.17) 1570-1596(2.84)                                                      |
| gnl UG Hs#S1726969  | 0.56 | 1 | 331-358(0.56)                                                                                                 |
| gnl UG Hs#S1731253  | 2.31 | 1 | 59-84(2.31)                                                                                                   |
| gnl UG Hs#S3603024  | 1.39 | 3 | 1300-1327(1.39) 1332-1357(0.98) 1415-1443(0.47)                                                               |
| gnl UG Hs#S4620649  | 1.58 | 1 | 1216-1241(1.58)                                                                                               |
| gnl UG Hs#S1727404  | 1.04 | 1 | 14-39(1.04)                                                                                                   |
| gnl UG Hs#S6664763  | 1.88 | 6 | 162-190(1.03) 763-789(0.30) 1214-1239(0.76) 1880-1906(0.20) 2105-2131(1.88) 2230-2254(0.07)                   |
| gnl UG Hs#S1730615  | 0.89 | 1 | 1777-1800(0.89)                                                                                               |
| gnl UG Hs#S2293621  | 0.46 | 2 | 44-69(0.46) 895-920(0.04)                                                                                     |
| gnl UG Hs#S3543052  | 0.33 | 1 | 323-348(0.33)                                                                                                 |
| gnl UG Hs#S1729992  | 0.14 | 1 | 347-372(0.14)                                                                                                 |
| gnl UG Hs#S1729846  | 1.4  | 1 | 797-823(1.40)                                                                                                 |

|                     |      |    |                                                                                                                                                                                          |
|---------------------|------|----|------------------------------------------------------------------------------------------------------------------------------------------------------------------------------------------|
| gnl UG Hs#S7110347  | 4.37 | 1  | 1545-1571(4.37)                                                                                                                                                                          |
| gnl UG Hs#S1728151  | 2.82 | 8  | 83-108(1.97) 498-523(2.52) 584-612(0.49) 861-885(2.40) 965-990(2.04) 1005-1030(1.82) 1100-1125(2.82) 1235-1260(0.65)                                                                     |
| gnl UG Hs#S3603808  | 3.56 | 1  | 239-266(3.56)                                                                                                                                                                            |
| gnl UG Hs#S1726762  | 3.67 | 3  | 292-320(0.94) 681-709(3.67) 866-894(0.81)                                                                                                                                                |
| gnl UG Hs#S5860337  | 4.69 | 3  | 919-947(0.68) 1098-1123(4.69) 1483-1509(0.20)                                                                                                                                            |
| gnl UG Hs#S1731639  | 2.62 | 5  | 273-301(2.30) 1189-1215(0.04) 1282-1309(2.62) 1804-1829(0.20) 1839-1864(0.23)                                                                                                            |
| gnl UG Hs#S2140714  | 1.82 | 1  | 166-191(1.82)                                                                                                                                                                            |
| gnl UG Hs#S2293186  | 1.2  | 1  | 170-195(1.20)                                                                                                                                                                            |
| gnl UG Hs#S4284788  | 1.76 | 1  | 168-194(1.76)                                                                                                                                                                            |
| gnl UG Hs#S4807796  | 2.3  | 1  | 416-441(2.30)                                                                                                                                                                            |
| gnl UG Hs#S2138721  | 1.04 | 1  | 70-95(1.04)                                                                                                                                                                              |
| gnl UG Hs#S4807886  | 1.08 | 1  | 1236-1262(1.08)                                                                                                                                                                          |
| gnl UG Hs#S4623573  | 3.59 | 2  | 435-461(3.59) 828-854(0.54)                                                                                                                                                              |
| gnl UG Hs#S3219445  | 3.13 | 1  | 423-448(3.13)                                                                                                                                                                            |
| gnl UG Hs#S1730943  | 4.99 | 9  | 497-522(0.98) 921-947(4.08) 1160-1186(4.99) 1497-1522(0.40) 2512-2537(0.13) 2569-2596(1.39) 2921-2946(0.57) 3092-3119(0.98) 3204-3229(3.42)                                              |
| gnl UG Hs#S1729351  | 2.72 | 6  | 35-60(2.05) 294-322(0.88) 519-546(0.29) 985-1011(1.98) 2312-2338(2.72) 2390-2418(0.66)                                                                                                   |
| gnl UG Hs#S7113303  | 1.63 | 3  | 1141-1166(0.76) 1243-1267(1.20) 1556-1581(1.63)                                                                                                                                          |
| gnl UG Hs#S1727811  | 0.3  | 1  | 1236-1259(0.30)                                                                                                                                                                          |
| gnl UG Hs#S1727990  | 1.56 | 3  | 418-445(1.56) 531-556(1.46) 568-596(0.01)                                                                                                                                                |
| gnl UG Hs#S1729513  | 0.88 | 2  | 17-43(0.88) 84-110(0.01)                                                                                                                                                                 |
| gnl UG Hs#S7110199  | 4.93 | 3  | 40-65(1.14) 673-699(4.93) 729-754(0.62)                                                                                                                                                  |
| gnl UG Hs#S3438859  | 1.98 | 3  | 523-546(0.04) 659-684(1.98) 804-829(0.66)                                                                                                                                                |
| gnl UG Hs#S2293680  | 0.81 | 1  | 51-77(0.81)                                                                                                                                                                              |
| gnl UG Hs#S1728472  | 0.18 | 1  | 212-237(0.18)                                                                                                                                                                            |
| gnl UG Hs#S7112122  | 0.53 | 2  | 79-104(0.53) 276-302(0.01)                                                                                                                                                               |
| gnl UG Hs#S3881163  | 3.14 | 3  | 563-588(3.14) 2431-2459(2.55) 3039-3063(1.26)                                                                                                                                            |
| gnl UG Hs#S3601676  | 3.5  | 4  | 366-391(0.91) 1161-1186(3.50) 1708-1736(1.94) 1927-1955(2.25)                                                                                                                            |
| gnl UG Hs#S7089699  | 4.45 | 4  | 16-41(3.36) 222-250(0.81) 274-299(2.72) 1137-1163(4.45)                                                                                                                                  |
| gnl UG Hs#S4828080  | 1.33 | 2  | 1194-1219(1.33) 1492-1517(0.24)                                                                                                                                                          |
| gnl UG Hs#S2139488  | 1.33 | 2  | 27-53(1.33) 132-157(1.02)                                                                                                                                                                |
| gnl UG Hs#S3219362  | 2.3  | 1  | 44-69(2.30)                                                                                                                                                                              |
| gnl UG Hs#S1730979  | 2.16 | 2  | 248-275(2.16) 1008-1033(1.25)                                                                                                                                                            |
| gnl UG Hs#S1731107  | 2.04 | 1  | 161-186(2.04)                                                                                                                                                                            |
| gnl UG Hs#S1726687  | 1.5  | 3  | 256-282(1.50) 446-471(0.62) 1062-1087(0.68)                                                                                                                                              |
| gnl UG Hs#S2293780  | 1.46 | 1  | 357-382(1.46)                                                                                                                                                                            |
| gnl UG Hs#S3438144  | 3.6  | 4  | 383-409(0.76) 418-443(0.98) 515-543(0.18) 668-694(3.60)                                                                                                                                  |
| gnl UG Hs#S1726918  | 0.62 | 1  | 96-121(0.62)                                                                                                                                                                             |
| gnl UG Hs#S15631814 | 2.07 | 1  | 361-386(2.07)                                                                                                                                                                            |
| gnl UG Hs#S2139647  | 4.3  | 3  | 1871-1896(1.46) 2232-2257(0.65) 2333-2358(4.30)                                                                                                                                          |
| gnl UG Hs#S4810354  | 4.94 | 10 | 5-28(1.54) 541-566(0.66) 2268-2294(2.68) 2320-2348(1.64) 2605-2630(0.13) 3209-3234(0.41) 3259-3284(2.82) 4059-4084(1.17) 4364-4389(4.94) 5266-5289(0.62)                                 |
| gnl UG Hs#S3219412  | 3.89 | 1  | 794-819(3.89)                                                                                                                                                                            |
| gnl UG Hs#S15632018 | 1.08 | 3  | 986-1011(0.43) 1149-1175(1.08) 1463-1488(0.19)                                                                                                                                           |
| gnl UG Hs#S1728251  | 1.06 | 4  | 61-86(1.06) 187-212(0.72) 354-379(0.20) 600-628(0.27)                                                                                                                                    |
| gnl UG Hs#S1727674  | 2.23 | 3  | 526-552(0.11) 794-819(0.08) 950-976(2.23)                                                                                                                                                |
| gnl UG Hs#S3219517  | 1.08 | 1  | 214-239(1.08)                                                                                                                                                                            |
| gnl UG Hs#S3355480  | 1.4  | 1  | 131-156(1.40)                                                                                                                                                                            |
| gnl UG Hs#S2140205  | 1.75 | 1  | 983-1006(1.75)                                                                                                                                                                           |
| gnl UG Hs#S2139250  | 4.2  | 13 | 229-254(0.24) 647-671(0.58) 1287-1312(0.62) 2859-2884(3.56) 2970-2995(0.89) 3038-3064(1.86) 3088-3113(4.20) 3169-3194(0.04) 4197-4224(0.59) 4421-4447(0.91) 4602-4627(1.26) 5086-5111(2) |
| gnl UG Hs#S1731537  | 0.82 | 1  | 22-47(0.82)                                                                                                                                                                              |
| gnl UG Hs#S1726245  | 4.9  | 1  | 73-98(4.90)                                                                                                                                                                              |
| gnl UG Hs#S1730489  | 2.53 | 1  | 558-583(2.53)                                                                                                                                                                            |
| gnl UG Hs#S3219166  | 1.81 | 2  | 134-162(1.81) 315-342(0.10)                                                                                                                                                              |
| gnl UG Hs#S1824430  | 0.01 | 1  | 606-632(0.01)                                                                                                                                                                            |
| gnl UG Hs#S3219484  | 0.72 | 2  | 228-255(0.14) 266-291(0.72)                                                                                                                                                              |



|                     |      |                                                                                                                                                                              |
|---------------------|------|------------------------------------------------------------------------------------------------------------------------------------------------------------------------------|
| gnl UG Hs#S4814805  | 0.92 | 2 678-703(0.58) 816-843(0.92)                                                                                                                                                |
| gnl UG Hs#S3438900  | 0.62 | 1 464-490(0.62)                                                                                                                                                              |
| gnl UG Hs#S2138769  | 3.5  | 9 92-114(0.95) 397-422(0.24) 472-498(0.59) 676-702(0.10) 871-896(0.13) 916-942(3.50) 971-997(2.17) 1101-1126(0.16) 1167-1192(2.30)                                           |
| gnl UG Hs#S1824512  | 0.5  | 1 406-432(0.50)                                                                                                                                                              |
| gnl UG Hs#S4824293  | 1.75 | 11 82-107(0.36) 110-135(1.46) 822-847(0.18) 1114-1137(0.02) 1163-1191(0.66) 1546-1571(0.65) 2125-2151(1.42) 2641-2667(1.75) 3396-3421(0.53) 3788-3814(1.40) 4249-4275(1.36)  |
| gnl UG Hs#S2140159  | 2.91 | 1 210-235(2.91)                                                                                                                                                              |
| gnl UG Hs#S2139905  | 2.27 | 1 771-799(2.27)                                                                                                                                                              |
| gnl UG Hs#S10832213 | 0.04 | 1 612-637(0.04)                                                                                                                                                              |
| gnl UG Hs#S4553527  | 3.4  | 2 164-190(3.40) 270-295(1.26)                                                                                                                                                |
| gnl UG Hs#S3880903  | 1.69 | 4 705-730(0.92) 811-836(0.85) 1384-1410(1.26) 1613-1639(1.69)                                                                                                                |
| gnl UG Hs#S7112103  | 4.14 | 6 49-75(0.34) 259-285(0.27) 1969-1995(4.14) 2114-2140(1.18) 2534-2559(1.91) 2682-2708(0.13)                                                                                  |
| gnl UG Hs#S2138660  | 2.37 | 2 194-220(1.72) 263-290(2.37)                                                                                                                                                |
| gnl UG Hs#S1824522  | 1.55 | 3 277-305(0.49) 313-338(1.55) 476-503(0.65)                                                                                                                                  |
| gnl UG Hs#S3547269  | 0.98 | 1 191-217(0.98)                                                                                                                                                              |
| gnl UG Hs#S15638184 | 1.81 | 1 184-208(1.81)                                                                                                                                                              |
| gnl UG Hs#S1731389  | 2.22 | 7 5-30(0.72) 66-89(0.21) 353-378(2.22) 648-673(0.50) 676-700(0.90) 712-738(1.76) 1168-1193(1.08)                                                                             |
| gnl UG Hs#S1731247  | 0.69 | 1 222-248(0.69)                                                                                                                                                              |
| gnl UG Hs#S1969097  | 3.48 | 5 100-125(1.17) 940-965(1.04) 1300-1325(3.48) 2148-2176(0.98) 3144-3169(2.53)                                                                                                |
| gnl UG Hs#S6163095  | 0.89 | 2 303-331(0.14) 369-394(0.89)                                                                                                                                                |
| gnl UG Hs#S2139618  | 0.19 | 1 984-1008(0.19)                                                                                                                                                             |
| gnl UG Hs#S4631310  | 0.14 | 1 733-758(0.14)                                                                                                                                                              |
| gnl UG Hs#S4553546  | 3.91 | 4 553-578(1.65) 926-951(0.18) 1543-1568(3.91) 1580-1605(0.66)                                                                                                                |
| gnl UG Hs#S15644796 | 3.3  | 2 766-791(2.06) 1475-1500(3.30)                                                                                                                                              |
| gnl UG Hs#S2293466  | 3.37 | 3 191-217(1.17) 339-367(2.81) 1094-1119(3.37)                                                                                                                                |
| gnl UG Hs#S3542704  | 4.72 | 4 1588-1614(1.23) 2563-2589(2.11) 2766-2789(0.88) 3202-3227(4.72)                                                                                                            |
| gnl UG Hs#S2139483  | 1.52 | 3 1294-1319(0.08) 2255-2280(1.52) 3950-3977(0.77)                                                                                                                            |
| gnl UG Hs#S1731179  | 0.98 | 1 146-172(0.98)                                                                                                                                                              |
| gnl UG Hs#S1730656  | 2.33 | 1 335-363(2.33)                                                                                                                                                              |
| gnl UG Hs#S15846833 | 1.44 | 2 424-447(0.82) 1830-1856(1.44)                                                                                                                                              |
| gnl UG Hs#S3987129  | 0.49 | 1 1258-1286(0.49)                                                                                                                                                            |
| gnl UG Hs#S2139733  | 0.16 | 1 109-137(0.16)                                                                                                                                                              |
| gnl UG Hs#S3219299  | 0.82 | 1 833-859(0.82)                                                                                                                                                              |
| gnl UG Hs#S3603863  | 0.98 | 2 506-534(0.98) 1173-1198(0.75)                                                                                                                                              |
| gnl UG Hs#S1726260  | 3.57 | 11 324-349(3.57) 794-820(0.91) 862-888(1.08) 1066-1093(0.33) 1154-1182(2.08) 1344-1372(0.96) 1595-1620(0.01) 1788-1813(2.30) 1970-1997(2.75) 2129-2156(1.40) 2344-2370(1.72) |
| gnl UG Hs#S1726276  | 1.26 | 3 814-840(1.26) 1330-1353(0.04) 1960-1988(0.38)                                                                                                                              |
| gnl UG Hs#S1727403  | 2.17 | 1 189-214(2.17)                                                                                                                                                              |
| gnl UG Hs#S3219158  | 0.42 | 2 105-127(0.42) 158-186(0.11)                                                                                                                                                |
| gnl UG Hs#S3219604  | 0.63 | 2 656-682(0.49) 739-764(0.63)                                                                                                                                                |
| gnl UG Hs#S15638196 | 0.94 | 2 819-844(0.94) 2820-2845(0.79)                                                                                                                                              |
| gnl UG Hs#S4631112  | 2.18 | 8 876-901(0.52) 914-941(0.16) 970-994(2.18) 1322-1347(0.04) 1475-1500(0.46) 2000-2026(0.34) 2033-2058(0.43) 2345-2373(1.71)                                                  |
| gnl UG Hs#S5931377  | 4.86 | 4 537-563(1.01) 887-913(4.86) 1015-1041(0.08) 1282-1308(0.49)                                                                                                                |
| gnl UG Hs#S1727478  | 3.62 | 3 980-1005(0.50) 1170-1195(3.62) 1548-1573(0.40)                                                                                                                             |
| gnl UG Hs#S3603162  | 0.33 | 1 265-290(0.33)                                                                                                                                                              |
| gnl UG Hs#S3987156  | 2.43 | 3 1385-1411(0.56) 1799-1825(1.55) 2487-2513(2.43)                                                                                                                            |
| gnl UG Hs#S2138864  | 2.65 | 5 8-33(2.65) 152-177(2.15) 468-495(0.45) 553-579(0.04) 589-614(0.30)                                                                                                         |
| gnl UG Hs#S1730012  | 0.98 | 3 1136-1162(0.89) 1329-1354(0.98) 2559-2584(0.46)                                                                                                                            |
| gnl UG Hs#S4823130  | 1.94 | 2 323-348(0.14) 1099-1124(1.94)                                                                                                                                              |
| gnl UG Hs#S4810711  | 1.17 | 1 263-288(1.17)                                                                                                                                                              |
| gnl UG Hs#S15631517 | 0.9  | 1 80-105(0.90)                                                                                                                                                               |
| gnl UG Hs#S2140091  | 4.07 | 4 427-453(0.40) 493-518(1.72) 626-650(4.07) 1318-1343(0.40)                                                                                                                  |
| gnl UG Hs#S1729845  | 0.26 | 2 342-367(0.03) 866-891(0.26)                                                                                                                                                |
| gnl UG Hs#S1730170  | 2.44 | 1 184-209(2.44)                                                                                                                                                              |
| gnl UG Hs#S2293666  | 2.3  | 1 276-301(2.30)                                                                                                                                                              |
| gnl UG Hs#S7111674  | 0.82 | 1 725-751(0.82)                                                                                                                                                              |

|                     |      |                                                                                                                                                   |
|---------------------|------|---------------------------------------------------------------------------------------------------------------------------------------------------|
| gnl UG Hs#S4808306  | 3.3  | 1 729-755(3.30)                                                                                                                                   |
| gnl UG Hs#S4823129  | 0.53 | 1 29-54(0.53)                                                                                                                                     |
| gnl UG Hs#S2140069  | 2.43 | 2 422-447(0.33) 576-601(2.43)                                                                                                                     |
| gnl UG Hs#S1731856  | 1.58 | 3 147-173(0.72) 1387-1412(1.58) 1509-1534(1.01)                                                                                                   |
| gnl UG Hs#S2655970  | 1.94 | 3 459-485(0.82) 547-572(1.94) 739-765(0.91)                                                                                                       |
| gnl UG Hs#S2139677  | 1.72 | 1 19-44(1.72)                                                                                                                                     |
| gnl UG Hs#S2139492  | 2.31 | 8 327-355(0.07) 362-388(2.31) 1794-1819(1.53) 2315-2340(1.53) 3031-3059(0.66) 3699-3724(1.40) 3736-3761(0.43) 4718-4743(0.81)                     |
| gnl UG Hs#S3438599  | 2.05 | 3 57-82(0.17) 218-244(0.12) 297-322(2.05)                                                                                                         |
| gnl UG Hs#S4824968  | 2.63 | 3 111-136(0.72) 406-431(0.30) 710-735(2.63)                                                                                                       |
| gnl UG Hs#S4614136  | 0.5  | 1 757-782(0.50)                                                                                                                                   |
| gnl UG Hs#S7110983  | 3.26 | 2 1405-1430(1.55) 1760-1785(3.26)                                                                                                                 |
| gnl UG Hs#S1729053  | 2.3  | 3 320-346(2.30) 446-471(1.78) 612-637(1.65)                                                                                                       |
| gnl UG Hs#S4807596  | 0.64 | 1 896-924(0.64)                                                                                                                                   |
| gnl UG Hs#S7112193  | 1.08 | 1 823-848(1.08)                                                                                                                                   |
| gnl UG Hs#S11046803 | 3.62 | 4 214-240(0.20) 330-355(1.56) 454-480(2.50) 620-648(3.62)                                                                                         |
| gnl UG Hs#S2655073  | 4.16 | 2 2949-2977(4.16) 3234-3259(1.46)                                                                                                                 |
| gnl UG Hs#S2140254  | 0.1  | 2 423-446(0.07) 534-562(0.10)                                                                                                                     |
| gnl UG Hs#S4545982  | 1.33 | 1 332-358(1.33)                                                                                                                                   |
| gnl UG Hs#S3602310  | 5.53 | 1 596-621(5.53)                                                                                                                                   |
| gnl UG Hs#S4396103  | 2.72 | 2 252-277(0.88) 357-382(2.72)                                                                                                                     |
| gnl UG Hs#S553747   | 2.26 | 4 506-531(1.91) 1664-1689(0.33) 1888-1914(0.34) 2247-2272(2.26)                                                                                   |
| gnl UG Hs#S4817439  | 4.12 | 8 318-343(0.46) 2523-2549(0.08) 3363-3388(1.26) 3526-3552(0.69) 3655-3680(4.12) 3846-3871(0.68) 5136-5162(2.01) 5366-5391(2.50)                   |
| gnl UG Hs#S14812577 | 0.48 | 1 34-59(0.48)                                                                                                                                     |
| gnl UG Hs#S4827482  | 1.1  | 1 62-85(1.10)                                                                                                                                     |
| gnl UG Hs#S11154086 | 1.98 | 2 16-41(0.11) 245-270(1.98)                                                                                                                       |
| gnl UG Hs#S3601564  | 4.53 | 8 744-769(1.11) 1063-1089(0.84) 1109-1134(0.62) 1137-1163(0.84) 1354-1379(4.53) 1539-1567(0.56) 1929-1953(2.33) 1962-1990(0.78)                   |
| gnl UG Hs#S6683095  | 4.47 | 2 104-129(0.57) 229-254(4.47)                                                                                                                     |
| gnl UG Hs#S1263853  | 1.72 | 3 1457-1485(0.33) 1761-1786(0.94) 1815-1840(1.72)                                                                                                 |
| gnl UG Hs#S1732333  | 0.76 | 3 206-231(0.76) 821-846(0.18) 947-972(0.65)                                                                                                       |
| gnl UG Hs#S1731599  | 0.11 | 1 100-125(0.11)                                                                                                                                   |
| gnl UG Hs#S1731051  | 0.84 | 1 232-258(0.84)                                                                                                                                   |
| gnl UG Hs#S2293907  | 3.89 | 2 26-51(1.53) 55-81(3.89)                                                                                                                         |
| gnl UG Hs#S3219054  | 2.98 | 4 2180-2208(0.98) 2353-2378(1.79) 2701-2727(2.04) 3129-3154(2.98)                                                                                 |
| gnl UG Hs#S4631367  | 0.05 | 1 134-159(0.05)                                                                                                                                   |
| gnl UG Hs#S2293483  | 0.81 | 1 743-768(0.81)                                                                                                                                   |
| gnl UG Hs#S4823017  | 3.33 | 1 202-228(3.33)                                                                                                                                   |
| gnl UG Hs#S2140015  | 1    | 2 358-382(0.30) 625-650(1.00)                                                                                                                     |
| gnl UG Hs#S5860340  | 5.46 | 2 1310-1338(0.40) 1839-1866(5.46)                                                                                                                 |
| gnl UG Hs#S2140522  | 0.94 | 1 120-146(0.94)                                                                                                                                   |
| gnl UG Hs#S4546285  | 2.33 | 3 25-50(1.11) 70-95(0.04) 484-510(2.33)                                                                                                           |
| gnl UG Hs#S15637523 | 2.45 | 2 579-602(0.89) 889-915(2.45)                                                                                                                     |
| gnl UG Hs#S1729032  | 0.07 | 1 316-343(0.07)                                                                                                                                   |
| gnl UG Hs#S4392294  | 6.4  | 7 340-365(1.26) 530-558(0.07) 911-936(0.89) 1062-1087(1.91) 1584-1607(1.21) 1765-1793(0.23) 1895-1923(6.40)                                       |
| gnl UG Hs#S4396110  | 0.69 | 1 560-586(0.69)                                                                                                                                   |
| gnl UG Hs#S1728589  | 5.7  | 2 712-739(0.51) 1266-1291(5.70)                                                                                                                   |
| gnl UG Hs#S3619114  | 0.98 | 1 463-488(0.98)                                                                                                                                   |
| gnl UG Hs#S1726867  | 1.27 | 2 174-200(1.27) 471-496(1.11)                                                                                                                     |
| gnl UG Hs#S1726565  | 2.87 | 2 328-353(1.09) 542-569(2.87)                                                                                                                     |
| gnl UG Hs#S6091959  | 0.07 | 1 32-57(0.07)                                                                                                                                     |
| gnl UG Hs#S2140550  | 3.82 | 9 1463-1489(0.72) 1769-1795(1.79) 2059-2085(1.30) 2818-2846(3.58) 3108-3134(3.82) 3206-3231(0.90) 3249-3274(1.16) 3356-3382(1.72) 3714-3740(0.98) |
| gnl UG Hs#S4840949  | 2.84 | 3 620-645(2.84) 910-935(0.20) 1044-1072(2.36)                                                                                                     |
| gnl UG Hs#S1727960  | 5.96 | 1 272-297(5.96)                                                                                                                                   |
| gnl UG Hs#S4285005  | 1    | 1 701-729(1.00)                                                                                                                                   |
| gnl UG Hs#S3603862  | 0.76 | 1 378-403(0.76)                                                                                                                                   |

|                     |      |                                                                                                                                             |
|---------------------|------|---------------------------------------------------------------------------------------------------------------------------------------------|
| gnl UG Hs#S3826039  | 0.4  | 1 778-803(0.40)                                                                                                                             |
| gnl UG Hs#S3619192  | 5.62 | 5 365-390(5.62) 577-602(0.92) 688-714(1.18) 923-948(0.50) 1474-1499(2.84)                                                                   |
| gnl UG Hs#S1570309  | 1.55 | 1 566-591(1.55)                                                                                                                             |
| gnl UG Hs#S3219936  | 1.39 | 6 213-240(0.94) 966-992(1.08) 2283-2308(0.62) 2431-2456(1.39) 2625-2651(0.17) 2668-2693(1.20)                                               |
| gnl UG Hs#S1728861  | 1.11 | 2 115-141(1.01) 254-279(1.11)                                                                                                               |
| gnl UG Hs#S4830985  | 1.91 | 2 1831-1855(0.04) 1960-1988(1.91)                                                                                                           |
| gnl UG Hs#S7111907  | 3.62 | 4 7-32(0.63) 388-414(0.69) 865-893(0.42) 952-977(3.62)                                                                                      |
| gnl UG Hs#S7110383  | 2.98 | 2 960-985(1.85) 1611-1635(2.98)                                                                                                             |
| gnl UG Hs#S4283266  | 0.17 | 2 472-497(0.08) 602-627(0.17)                                                                                                               |
| gnl UG Hs#S1728126  | 1.65 | 2 412-437(0.74) 1560-1585(1.65)                                                                                                             |
| gnl UG Hs#S1726773  | 0.55 | 1 520-545(0.55)                                                                                                                             |
| gnl UG Hs#S3322813  | 0.81 | 1 636-664(0.81)                                                                                                                             |
| gnl UG Hs#S2140115  | 4.21 | 2 105-131(0.23) 319-344(4.21)                                                                                                               |
| gnl UG Hs#S3219059  | 2.72 | 2 254-279(2.72) 825-850(0.30)                                                                                                               |
| gnl UG Hs#S1728247  | 1.94 | 1 230-258(1.94)                                                                                                                             |
| gnl UG Hs#S2139396  | 1.58 | 2 18-44(1.58) 160-188(1.30)                                                                                                                 |
| gnl UG Hs#S4554647  | 1.72 | 2 57-82(1.72) 540-568(0.94)                                                                                                                 |
| gnl UG Hs#S5978588  | 0.23 | 1 631-657(0.23)                                                                                                                             |
| gnl UG Hs#S1731725  | 0.98 | 1 123-148(0.98)                                                                                                                             |
| gnl UG Hs#S3973027  | 3.97 | 3 454-482(0.66) 954-979(3.97) 1447-1473(1.27)                                                                                               |
| gnl UG Hs#S1728477  | 0.4  | 3 292-316(0.14) 671-696(0.02) 1212-1237(0.40)                                                                                               |
| gnl UG Hs#S2139718  | 2.47 | 3 68-93(2.47) 214-239(1.30) 1063-1088(0.98)                                                                                                 |
| gnl UG Hs#S3619735  | 0.88 | 3 100-125(0.88) 604-629(0.26) 790-815(0.01)                                                                                                 |
| gnl UG Hs#S4822011  | 2.62 | 2 1457-1482(1.72) 1665-1691(2.62)                                                                                                           |
| gnl UG Hs#S5494983  | 0.56 | 1 344-367(0.56)                                                                                                                             |
| gnl UG Hs#S2293834  | 1.01 | 2 78-105(1.01) 316-341(0.14)                                                                                                                |
| gnl UG Hs#S2140370  | 5.52 | 6 584-609(5.52) 665-690(1.21) 1357-1383(0.62) 1526-1552(0.27) 1660-1686(1.08) 2203-2229(0.44)                                               |
| gnl UG Hs#S3619168  | 0.04 | 1 504-529(0.04)                                                                                                                             |
| gnl UG Hs#S4546049  | 3.47 | 3 2100-2128(3.14) 2312-2338(3.47) 2346-2371(2.20)                                                                                           |
| gnl UG Hs#S2138708  | 3.62 | 1 308-336(3.62)                                                                                                                             |
| gnl UG Hs#S3603083  | 4.89 | 9 535-561(3.76) 593-618(2.79) 963-988(2.36) 1301-1326(4.89) 1731-1754(0.51) 2153-2178(0.46) 2332-2357(0.46) 2506-2534(0.91) 3288-3315(0.52) |
| gnl UG Hs#S1730316  | 3.5  | 5 582-608(3.50) 612-637(1.62) 879-904(0.26) 1084-1110(0.23) 2771-2796(1.21)                                                                 |
| gnl UG Hs#S2294297  | 2.01 | 4 379-403(1.94) 518-544(0.49) 975-1000(2.01) 1034-1059(1.26)                                                                                |
| gnl UG Hs#S4545955  | 0.4  | 1 27-52(0.40)                                                                                                                               |
| gnl UG Hs#S1971572  | 1.94 | 1 1668-1693(1.94)                                                                                                                           |
| gnl UG Hs#S11046977 | 0.44 | 1 1632-1658(0.44)                                                                                                                           |
| gnl UG Hs#S4818186  | 1.01 | 2 271-299(1.01) 531-557(0.89)                                                                                                               |
| gnl UG Hs#S2139518  | 2.08 | 2 474-500(2.08) 4533-4558(0.30)                                                                                                             |
| gnl UG Hs#S1729962  | 0.94 | 2 2-26(0.11) 121-146(0.94)                                                                                                                  |
| gnl UG Hs#S4045805  | 1.3  | 1 706-731(1.30)                                                                                                                             |
| gnl UG Hs#S5930851  | 0.18 | 1 2170-2196(0.18)                                                                                                                           |
| gnl UG Hs#S3988019  | 1.48 | 1 141-165(1.48)                                                                                                                             |
| gnl UG Hs#S1730692  | 1.55 | 3 1477-1502(0.62) 2371-2397(1.55) 2423-2449(1.01)                                                                                           |
| gnl UG Hs#S2293645  | 1.76 | 4 100-126(1.76) 256-282(0.23) 897-922(1.57) 953-980(0.39)                                                                                   |
| gnl UG Hs#S3438789  | 2.85 | 1 28-53(2.85)                                                                                                                               |
| gnl UG Hs#S5930821  | 2.57 | 3 227-253(0.98) 266-291(0.69) 452-477(2.57)                                                                                                 |
| gnl UG Hs#S1367625  | 1.97 | 1 556-581(1.97)                                                                                                                             |
| gnl UG Hs#S1729693  | 0.75 | 1 67-95(0.75)                                                                                                                               |
| gnl UG Hs#S1730671  | 1.04 | 1 64-89(1.04)                                                                                                                               |
| gnl UG Hs#S1727897  | 0.2  | 1 413-438(0.20)                                                                                                                             |
| gnl UG Hs#S15640053 | 1.4  | 1 764-787(1.40)                                                                                                                             |
| gnl UG Hs#S3987135  | 0.72 | 2 1284-1310(0.11) 1429-1454(0.72)                                                                                                           |
| gnl UG Hs#S4821845  | 3.4  | 3 228-254(3.40) 435-460(0.53) 514-540(0.46)                                                                                                 |
| gnl UG Hs#S4809516  | 2.23 | 5 706-732(0.89) 1090-1115(0.72) 2564-2591(1.14) 3711-3737(2.15) 3747-3773(2.23)                                                             |

|                     |      |                                                                                                                                                       |
|---------------------|------|-------------------------------------------------------------------------------------------------------------------------------------------------------|
| gnl UG Hs#S7112114  | 5.94 | 1 339-364(5.94)                                                                                                                                       |
| gnl UG Hs#S3355697  | 1.91 | 1 96-121(1.91)                                                                                                                                        |
| gnl UG Hs#S4435529  | 0.82 | 2 48-73(0.21) 600-625(0.82)                                                                                                                           |
| gnl UG Hs#S1730801  | 3.72 | 10 6-32(2.53) 196-223(1.41) 470-495(3.72) 817-842(0.84) 965-990(0.97) 1465-1492(1.94) 1955-1980(1.05) 2194-2220(1.69) 2238-2264(0.04) 2484-2509(0.23) |
| gnl UG Hs#S1727947  | 1.53 | 1 2572-2597(1.53)                                                                                                                                     |
| gnl UG Hs#S3438389  | 3.11 | 2 236-261(3.11) 1503-1529(1.64)                                                                                                                       |
| gnl UG Hs#S1569867  | 0.72 | 3 201-227(0.04) 364-389(0.72) 598-624(0.14)                                                                                                           |
| gnl UG Hs#S3220202  | 1.64 | 5 1039-1064(0.75) 1154-1182(1.64) 1422-1447(0.20) 2512-2538(0.17) 2543-2568(0.13)                                                                     |
| gnl UG Hs#S4621613  | 0.66 | 1 389-414(0.66)                                                                                                                                       |
| gnl UG Hs#S1730968  | 1.23 | 2 789-814(1.23) 1940-1966(0.10)                                                                                                                       |
| gnl UG Hs#S1729912  | 0.57 | 1 80-106(0.57)                                                                                                                                        |
| gnl UG Hs#S3219941  | 3.5  | 1 307-333(3.50)                                                                                                                                       |
| gnl UG Hs#S1727259  | 1.34 | 1 459-483(1.34)                                                                                                                                       |
| gnl UG Hs#S2293677  | 1.08 | 3 1424-1449(1.08) 1532-1558(0.30) 1764-1789(0.46)                                                                                                     |
| gnl UG Hs#S1726956  | 0.11 | 1 209-235(0.11)                                                                                                                                       |
| gnl UG Hs#S10831830 | 0.49 | 1 625-653(0.49)                                                                                                                                       |
| gnl UG Hs#S4827242  | 3.69 | 3 184-212(1.81) 351-376(0.01) 416-441(3.69)                                                                                                           |
| gnl UG Hs#S1727919  | 3.04 | 1 451-476(3.04)                                                                                                                                       |
| gnl UG Hs#S1727807  | 0.79 | 2 179-204(0.04) 342-367(0.79)                                                                                                                         |
| gnl UG Hs#S4620211  | 5.35 | 3 923-949(5.35) 1322-1347(0.97) 2132-2157(0.91)                                                                                                       |
| gnl UG Hs#S2139034  | 2.23 | 2 33-59(2.23) 364-390(0.27)                                                                                                                           |
| gnl UG Hs#S2294628  | 2.68 | 1 388-413(2.68)                                                                                                                                       |
| gnl UG Hs#S1726544  | 0.65 | 1 188-211(0.65)                                                                                                                                       |
| gnl UG Hs#S2293209  | 1.78 | 3 95-121(1.78) 411-436(0.30) 487-515(1.40)                                                                                                            |
| gnl UG Hs#S4813245  | 2.13 | 6 178-203(0.30) 317-343(0.54) 367-393(0.72) 615-640(2.13) 783-808(0.84) 930-958(0.04)                                                                 |
| gnl UG Hs#S1729926  | 0.08 | 1 976-1002(0.08)                                                                                                                                      |
| gnl UG Hs#S1731442  | 1.07 | 1 338-363(1.07)                                                                                                                                       |
| gnl UG Hs#S4046238  | 0.62 | 1 1275-1303(0.62)                                                                                                                                     |
| gnl UG Hs#S2139975  | 0.89 | 1 464-490(0.89)                                                                                                                                       |
| gnl UG Hs#S1727460  | 1.88 | 2 537-564(0.13) 1384-1412(1.88)                                                                                                                       |
| gnl UG Hs#S1729277  | 3.3  | 6 193-218(0.62) 342-368(0.57) 1066-1094(0.30) 1351-1376(3.30) 1867-1892(1.14) 1908-1934(0.49)                                                         |
| gnl UG Hs#S1729759  | 0.79 | 1 1412-1438(0.79)                                                                                                                                     |
| gnl UG Hs#S1730260  | 1.4  | 1 280-308(1.40)                                                                                                                                       |
| gnl UG Hs#S4828011  | 4.04 | 4 251-275(0.88) 406-431(1.46) 436-461(3.94) 497-522(4.04)                                                                                             |
| gnl UG Hs#S3219666  | 0.14 | 1 787-815(0.14)                                                                                                                                       |
| gnl UG Hs#S14272885 | 2.56 | 3 111-137(2.56) 261-289(0.33) 320-345(1.33)                                                                                                           |
| gnl UG Hs#S3601778  | 1.79 | 2 58-84(1.79) 101-126(0.20)                                                                                                                           |
| gnl UG Hs#S4553483  | 2.79 | 3 32-58(2.26) 378-403(2.79) 702-727(1.46)                                                                                                             |
| gnl UG Hs#S3601543  | 3.58 | 2 191-216(3.58) 245-271(0.04)                                                                                                                         |
| gnl UG Hs#S2140327  | 3.25 | 7 362-387(0.20) 776-801(3.25) 855-881(3.15) 914-939(1.75) 1128-1154(1.91) 1213-1238(2.03) 1309-1334(1.07)                                             |
| gnl UG Hs#S3439043  | 3.63 | 3 751-776(1.30) 947-972(0.66) 1262-1287(3.63)                                                                                                         |
| gnl UG Hs#S1728154  | 2    | 2 368-392(2.00) 393-417(1.21)                                                                                                                         |
| gnl UG Hs#S1727571  | 3.88 | 4 131-155(0.36) 483-508(0.13) 726-754(3.88) 900-930(0.03)                                                                                             |
| gnl UG Hs#S1727552  | 0.26 | 1 251-274(0.26)                                                                                                                                       |
| gnl UG Hs#S3987807  | 3.26 | 1 110-135(3.26)                                                                                                                                       |
| gnl UG Hs#S1731576  | 3.21 | 2 12-38(0.24) 143-168(3.21)                                                                                                                           |
| gnl UG Hs#S14812644 | 0.68 | 1 402-428(0.68)                                                                                                                                       |
| gnl UG Hs#S4045725  | 1.4  | 3 936-962(1.40) 1123-1149(0.62) 1174-1199(1.40)                                                                                                       |
| gnl UG Hs#S1729739  | 1.3  | 2 324-350(0.83) 566-590(1.30)                                                                                                                         |
| gnl UG Hs#S3219911  | 0.89 | 1 402-428(0.89)                                                                                                                                       |
| gnl UG Hs#S14273229 | 2.72 | 1 1122-1147(2.72)                                                                                                                                     |
| gnl UG Hs#S4284975  | 0.62 | 1 51-75(0.62)                                                                                                                                         |
| gnl UG Hs#S3880622  | 0.16 | 1 1218-1246(0.16)                                                                                                                                     |
| gnl UG Hs#S1824539  | 1.4  | 1 115-140(1.40)                                                                                                                                       |

|                     |      |   |                                                                                            |
|---------------------|------|---|--------------------------------------------------------------------------------------------|
| gnl UG Hs#S2140516  | 0.78 | 3 | 930-954(0.78) 1483-1508(0.46) 1595-1620(0.23)                                              |
| gnl UG Hs#S1732448  | 0.91 | 2 | 295-321(0.91) 734-763(0.88)                                                                |
| gnl UG Hs#S3603870  | 0.62 | 1 | 1146-1174(0.62)                                                                            |
| gnl UG Hs#S4623548  | 1.3  | 1 | 1605-1630(1.30)                                                                            |
| gnl UG Hs#S7110345  | 1.24 | 1 | 216-241(1.24)                                                                              |
| gnl UG Hs#S4808633  | 2.72 | 6 | 248-274(1.08) 561-586(0.17) 990-1015(2.72) 1717-1741(1.73) 2299-2324(1.04) 2535-2560(0.40) |
| gnl UG Hs#S1727835  | 2.04 | 1 | 534-559(2.04)                                                                              |
| gnl UG Hs#S3219504  | 2.04 | 3 | 1165-1190(0.33) 1215-1239(1.91) 1347-1375(2.04)                                            |
| gnl UG Hs#S4283789  | 2.78 | 4 | 184-209(0.40) 1172-1197(0.40) 1287-1312(0.76) 1460-1485(2.78)                              |
| gnl UG Hs#S2138910  | 1.88 | 2 | 423-451(1.88) 536-561(1.17)                                                                |
| gnl UG Hs#S2294409  | 0.45 | 1 | 277-305(0.45)                                                                              |
| gnl UG Hs#S1731773  | 1.43 | 5 | 242-268(0.77) 393-418(0.45) 658-682(0.08) 1056-1081(1.43) 1137-1165(0.35)                  |
| gnl UG Hs#S4807825  | 3.86 | 2 | 342-367(3.30) 473-498(3.86)                                                                |
| gnl UG Hs#S1732203  | 0.72 | 1 | 34-59(0.72)                                                                                |
| gnl UG Hs#S1972400  | 2.72 | 3 | 681-707(0.08) 1749-1774(2.72) 1788-1813(0.79)                                              |
| gnl UG Hs#S2139557  | 1.72 | 4 | 314-339(0.20) 573-598(0.30) 1063-1089(1.72) 1232-1258(0.30)                                |
| gnl UG Hs#S3220074  | 1.32 | 1 | 1222-1247(1.32)                                                                            |
| gnl UG Hs#S4553560  | 0.37 | 1 | 279-304(0.37)                                                                              |
| gnl UG Hs#S3219895  | 1.23 | 1 | 116-145(1.23)                                                                              |
| gnl UG Hs#S1731697  | 1.94 | 2 | 329-354(1.94) 824-851(1.62)                                                                |
| gnl UG Hs#S4619406  | 1.37 | 5 | 957-982(0.81) 1273-1298(0.20) 1809-1837(1.37) 2041-2066(0.90) 2188-2216(0.49)              |
| gnl UG Hs#S3619315  | 0.27 | 1 | 325-351(0.27)                                                                              |
| gnl UG Hs#S4830021  | 3.4  | 5 | 392-416(3.40) 510-536(0.27) 903-928(2.26) 970-995(3.30) 1241-1266(1.08)                    |
| gnl UG Hs#S10832381 | 1.58 | 5 | 633-658(0.37) 661-688(0.74) 1231-1256(0.07) 1372-1398(1.58) 3051-3076(0.97)                |
| gnl UG Hs#S3880641  | 0.98 | 2 | 1398-1423(0.72) 1476-1501(0.98)                                                            |
| gnl UG Hs#S1729164  | 1.81 | 5 | 16-43(0.88) 78-106(1.81) 141-166(1.04) 174-199(0.14) 358-383(1.33)                         |
| gnl UG Hs#S1367636  | 0.17 | 1 | 1537-1562(0.17)                                                                            |
| gnl UG Hs#S4435657  | 6.04 | 1 | 407-433(6.04)                                                                              |
| gnl UG Hs#S2138978  | 1.94 | 2 | 483-509(1.94) 798-823(1.72)                                                                |
| gnl UG Hs#S2139875  | 0.99 | 1 | 495-519(0.99)                                                                              |
| gnl UG Hs#S3355545  | 4.14 | 2 | 609-635(0.88) 680-705(4.14)                                                                |
| gnl UG Hs#S2293215  | 0.72 | 2 | 535-560(0.72) 739-765(0.17)                                                                |
| gnl UG Hs#S4806165  | 3.04 | 5 | 403-429(2.33) 582-607(0.86) 2038-2063(3.04) 2728-2756(0.49) 2917-2943(2.27)                |
| gnl UG Hs#S1726616  | 0.5  | 1 | 929-954(0.50)                                                                              |
| gnl UG Hs#S1732403  | 0.8  | 2 | 226-251(0.17) 399-424(0.80)                                                                |
| gnl UG Hs#S10832188 | 0.53 | 1 | 253-278(0.53)                                                                              |
| gnl UG Hs#S3601777  | 2.3  | 3 | 121-147(0.57) 158-184(1.86) 646-671(2.30)                                                  |
| gnl UG Hs#S15638574 | 0.77 | 3 | 440-465(0.40) 503-529(0.77) 708-736(0.03)                                                  |
| gnl UG Hs#S1727635  | 1.66 | 1 | 631-659(1.66)                                                                              |
| gnl UG Hs#S4618009  | 0.39 | 1 | 622-647(0.39)                                                                              |
| gnl UG Hs#S3438795  | 2.3  | 2 | 242-267(0.65) 337-362(2.30)                                                                |
| gnl UG Hs#S12743751 | 2.67 | 4 | 1167-1195(0.66) 1409-1434(1.40) 1931-1957(2.67) 2367-2395(1.66)                            |
| gnl UG Hs#S816208   | 1.66 | 1 | 156-183(1.66)                                                                              |
| gnl UG Hs#S1727242  | 1.73 | 2 | 1123-1149(1.04) 2543-2568(1.73)                                                            |
| gnl UG Hs#S4807571  | 0.91 | 1 | 244-270(0.91)                                                                              |
| gnl UG Hs#S15898552 | 1.58 | 3 | 342-368(0.57) 5809-5835(1.32) 6261-6286(1.58)                                              |
| gnl UG Hs#S4820146  | 1.71 | 1 | 609-637(1.71)                                                                              |
| gnl UG Hs#S1731224  | 6.85 | 4 | 670-695(1.05) 2844-2869(0.62) 3687-3711(3.08) 4201-4226(6.85)                              |
| gnl UG Hs#S2140643  | 2.23 | 2 | 100-124(0.36) 190-216(2.23)                                                                |
| gnl UG Hs#S1728418  | 0.82 | 1 | 887-912(0.82)                                                                              |
| gnl UG Hs#S1730546  | 3.08 | 5 | 261-287(3.08) 1302-1328(1.43) 1392-1417(0.84) 2020-2045(0.57) 2173-2201(0.08)              |
| gnl UG Hs#S15643955 | 3.52 | 2 | 184-209(3.52) 1552-1576(0.07)                                                              |
| gnl UG Hs#S2139307  | 2.84 | 4 | 2069-2095(2.40) 2720-2745(2.84) 2763-2789(0.72) 3258-3281(0.30)                            |
| gnl UG Hs#S2294189  | 0.34 | 1 | 609-634(0.34)                                                                              |

|                     |      |                                                                                                                                                                                                |
|---------------------|------|------------------------------------------------------------------------------------------------------------------------------------------------------------------------------------------------|
| gnl UG Hs#S15638818 | 2.2  | 12 243-270(1.89) 550-575(0.38) 2076-2101(0.44) 2301-2327(2.04) 2540-2566(1.44) 2643-2669(2.20) 2954-2979(0.40) 2985-3009(0.86) 4259-4287(0.26) 4405-4433(1.15) 4794-4819(0.14) 5357-5382(0.75) |
| gnl UG Hs#S1726290  | 0.75 | 1 458-486(0.75)                                                                                                                                                                                |
| gnl UG Hs#S2140235  | 2.98 | 5 1010-1035(0.85) 1065-1089(0.04) 1238-1263(2.46) 1272-1300(2.88) 1319-1345(2.98)                                                                                                              |
| gnl UG Hs#S4396086  | 0.59 | 1 29-55(0.59)                                                                                                                                                                                  |
| gnl UG Hs#S2139847  | 2.66 | 5 187-212(0.46) 541-569(0.52) 1131-1159(2.66) 1184-1211(0.46) 1257-1283(0.62)                                                                                                                  |
| gnl UG Hs#S1731717  | 0.84 | 2 1269-1294(0.84) 1352-1377(0.84)                                                                                                                                                              |
| gnl UG Hs#S1729793  | 3    | 7 916-941(2.79) 1087-1112(0.46) 1154-1179(3.00) 1339-1365(2.34) 1492-1520(2.10) 1692-1717(1.26) 1798-1824(1.67)                                                                                |
| gnl UG Hs#S2293852  | 1.72 | 1 464-489(1.72)                                                                                                                                                                                |
| gnl UG Hs#S4631392  | 2.94 | 3 1090-1115(2.57) 1589-1614(2.94) 2008-2034(2.50)                                                                                                                                              |
| gnl UG Hs#S3219377  | 2.98 | 3 2600-2625(2.58) 4564-4591(2.98) 4858-4885(0.17)                                                                                                                                              |
| gnl UG Hs#S2294288  | 3.15 | 1 196-221(3.15)                                                                                                                                                                                |
| gnl UG Hs#S4553585  | 1.81 | 1 459-486(1.81)                                                                                                                                                                                |
| gnl UG Hs#S2294215  | 1.98 | 1 5-30(1.98)                                                                                                                                                                                   |
| gnl UG Hs#S1727062  | 3.36 | 8 723-747(0.35) 1538-1563(0.62) 1695-1720(3.36) 2209-2235(0.36) 2354-2379(0.55) 2825-2850(0.46) 3343-3366(0.07) 3693-3719(0.69)                                                                |
| gnl UG Hs#S2140171  | 1.98 | 1 825-851(1.98)                                                                                                                                                                                |
| gnl UG Hs#S4807568  | 0.04 | 1 396-421(0.04)                                                                                                                                                                                |
| gnl UG Hs#S5978415  | 1.08 | 2 445-471(1.08) 598-623(0.24)                                                                                                                                                                  |
| gnl UG Hs#S4045982  | 1.03 | 2 194-220(0.72) 881-909(1.03)                                                                                                                                                                  |
| gnl UG Hs#S1732192  | 0.23 | 1 808-834(0.23)                                                                                                                                                                                |
| gnl UG Hs#S3603186  | 0.25 | 1 83-106(0.25)                                                                                                                                                                                 |
| gnl UG Hs#S5978569  | 4.3  | 8 665-690(1.14) 763-787(2.10) 2094-2122(0.87) 2333-2359(0.24) 2595-2621(1.27) 2624-2649(4.30) 3144-3172(0.03) 3239-3264(1.21)                                                                  |
| gnl UG Hs#S2139594  | 0.84 | 3 364-389(0.48) 785-810(0.56) 998-1023(0.84)                                                                                                                                                   |
| gnl UG Hs#S1726675  | 1.4  | 1 3584-3612(1.40)                                                                                                                                                                              |
| gnl UG Hs#S1727419  | 0.59 | 1 149-174(0.59)                                                                                                                                                                                |
| gnl UG Hs#S3601598  | 2.12 | 4 256-284(0.08) 332-358(2.12) 590-613(0.89) 895-921(1.46)                                                                                                                                      |
| gnl UG Hs#S15644267 | 3.4  | 3 276-301(0.13) 361-387(1.62) 553-579(3.40)                                                                                                                                                    |
| gnl UG Hs#S4821728  | 2.92 | 1 1431-1456(2.92)                                                                                                                                                                              |
| gnl UG Hs#S2294029  | 5.79 | 2 76-101(5.79) 480-505(0.14)                                                                                                                                                                   |
| gnl UG Hs#S15632493 | 1.71 | 1 278-305(1.71)                                                                                                                                                                                |
| gnl UG Hs#S2140020  | 2.26 | 3 160-185(2.26) 237-262(0.07) 409-434(0.26)                                                                                                                                                    |
| gnl UG Hs#S5978512  | 1.65 | 1 415-442(1.65)                                                                                                                                                                                |
| gnl UG Hs#S3218929  | 3.2  | 2 1071-1096(0.40) 1152-1177(3.20)                                                                                                                                                              |
| gnl UG Hs#S1728859  | 0.17 | 1 2296-2321(0.17)                                                                                                                                                                              |
| gnl UG Hs#S2139658  | 0.17 | 1 1008-1033(0.17)                                                                                                                                                                              |
| gnl UG Hs#S1728508  | 2.82 | 1 532-557(2.82)                                                                                                                                                                                |
| gnl UG Hs#S2294302  | 2.46 | 5 112-137(0.53) 430-456(1.82) 1517-1545(0.08) 1556-1585(0.56) 1826-1851(2.46)                                                                                                                  |
| gnl UG Hs#S3438907  | 4.08 | 1 279-305(4.08)                                                                                                                                                                                |
| gnl UG Hs#S4807779  | 1.6  | 2 2106-2132(1.60) 2215-2242(1.47)                                                                                                                                                              |
| gnl UG Hs#S4546086  | 3.2  | 7 301-328(3.20) 652-677(0.30) 1218-1246(0.98) 1714-1742(0.33) 1746-1774(0.58) 1888-1913(0.82) 2009-2034(0.04)                                                                                  |
| gnl UG Hs#S2294393  | 1.3  | 1 1071-1096(1.30)                                                                                                                                                                              |
| gnl UG Hs#S1730669  | 0.16 | 1 35-63(0.16)                                                                                                                                                                                  |
| gnl UG Hs#S2293768  | 2.8  | 2 734-760(2.80) 1087-1114(1.39)                                                                                                                                                                |
| gnl UG Hs#S2139457  | 0.17 | 1 5530-5555(0.17)                                                                                                                                                                              |
| gnl UG Hs#S4824258  | 2.4  | 7 106-132(1.62) 672-699(1.92) 729-755(0.66) 958-985(0.85) 1578-1606(2.40) 1695-1720(0.14) 2774-2799(0.65)                                                                                      |
| gnl UG Hs#S4553450  | 1.4  | 2 583-609(1.40) 759-784(0.84)                                                                                                                                                                  |
| gnl UG Hs#S1728579  | 2.61 | 1 23-48(2.61)                                                                                                                                                                                  |
| gnl UG Hs#S4546004  | 3.82 | 1 287-312(3.82)                                                                                                                                                                                |
| gnl UG Hs#S4821332  | 1.06 | 5 100-123(1.06) 1691-1716(0.62) 1905-1930(0.67) 4320-4348(1.03) 4922-4945(1.02)                                                                                                                |
| gnl UG Hs#S2140305  | 0.49 | 2 364-391(0.17) 433-461(0.49)                                                                                                                                                                  |
| gnl UG Hs#S2139184  | 0.54 | 1 94-120(0.54)                                                                                                                                                                                 |
| gnl UG Hs#S3219260  | 0.59 | 4 466-491(0.26) 743-769(0.59) 2027-2052(0.04) 2316-2344(0.08)                                                                                                                                  |
| gnl UG Hs#S1730209  | 2.06 | 1 278-303(2.06)                                                                                                                                                                                |
| gnl UG Hs#S472607   | 2.72 | 1 150-176(2.72)                                                                                                                                                                                |
| gnl UG Hs#S7111155  | 1.5  | 2 1478-1506(0.71) 2064-2089(1.50)                                                                                                                                                              |

|                     |      |    |                                                                                                                                                                               |
|---------------------|------|----|-------------------------------------------------------------------------------------------------------------------------------------------------------------------------------|
| gnl UG Hs#S4811302  | 2.82 | 8  | 1080-1105(2.52) 1370-1395(0.24) 1856-1882(0.97) 1935-1960(0.13) 1968-1993(1.43) 2394-2419(1.95) 3412-3437(1.47) 3479-3505(2.82)                                               |
| gnl UG Hs#S2294348  | 3.88 | 5  | 389-415(0.50) 503-531(0.71) 606-631(0.33) 1800-1823(0.62) 1907-1935(3.88)                                                                                                     |
| gnl UG Hs#S1732121  | 0.26 | 1  | 174-201(0.26)                                                                                                                                                                 |
| gnl UG Hs#S1731497  | 0.01 | 1  | 286-312(0.01)                                                                                                                                                                 |
| gnl UG Hs#S4631420  | 2.5  | 1  | 758-784(2.50)                                                                                                                                                                 |
| gnl UG Hs#S2139292  | 1.4  | 2  | 173-198(1.40) 633-659(1.01)                                                                                                                                                   |
| gnl UG Hs#S1728733  | 2.72 | 1  | 145-171(2.72)                                                                                                                                                                 |
| gnl UG Hs#S4554163  | 1.58 | 5  | 1261-1288(1.57) 1949-1974(0.65) 2159-2184(0.98) 2304-2331(1.58) 2433-2458(0.91)                                                                                               |
| gnl UG Hs#S5860347  | 0.86 | 3  | 456-481(0.79) 989-1014(0.82) 1579-1605(0.86)                                                                                                                                  |
| gnl UG Hs#S15631442 | 2.5  | 4  | 349-375(1.62) 628-654(2.50) 738-763(0.82) 848-872(1.57)                                                                                                                       |
| gnl UG Hs#S1730066  | 1.57 | 3  | 1240-1265(1.57) 1271-1296(0.40) 1307-1333(1.04)                                                                                                                               |
| gnl UG Hs#S1730493  | 4.39 | 3  | 1119-1147(4.39) 1173-1199(1.59) 1202-1227(0.84)                                                                                                                               |
| gnl UG Hs#S1726821  | 0.18 | 1  | 838-863(0.18)                                                                                                                                                                 |
| gnl UG Hs#S1727761  | 0.63 | 1  | 278-303(0.63)                                                                                                                                                                 |
| gnl UG Hs#S3220122  | 0.98 | 2  | 124-150(0.98) 1272-1297(0.33)                                                                                                                                                 |
| gnl UG Hs#S15631564 | 2.58 | 2  | 118-143(2.58) 540-565(0.84)                                                                                                                                                   |
| gnl UG Hs#S2140412  | 0.5  | 1  | 323-348(0.50)                                                                                                                                                                 |
| gnl UG Hs#S3547215  | 3.4  | 2  | 1428-1453(0.67) 1582-1607(3.40)                                                                                                                                               |
| gnl UG Hs#S1727272  | 0.91 | 1  | 217-242(0.91)                                                                                                                                                                 |
| gnl UG Hs#S2139680  | 0.72 | 1  | 597-622(0.72)                                                                                                                                                                 |
| gnl UG Hs#S2139935  | 0.98 | 2  | 26-51(0.98) 159-184(0.30)                                                                                                                                                     |
| gnl UG Hs#S1727439  | 1.9  | 5  | 98-122(0.13) 499-523(1.90) 530-556(0.27) 835-861(0.72) 1011-1037(1.50)                                                                                                        |
| gnl UG Hs#S2138669  | 2.3  | 1  | 552-577(2.30)                                                                                                                                                                 |
| gnl UG Hs#S1731029  | 4.69 | 2  | 66-92(4.69) 940-963(1.02)                                                                                                                                                     |
| gnl UG Hs#S3219203  | 3.53 | 4  | 220-245(3.53) 726-751(2.04) 1344-1367(1.28) 1572-1600(2.10)                                                                                                                   |
| gnl UG Hs#S2293342  | 4.3  | 8  | 255-280(2.08) 331-359(4.30) 435-461(0.89) 504-528(1.93) 536-561(1.04) 572-598(0.72) 741-766(0.59) 1042-1069(0.20)                                                             |
| gnl UG Hs#S1726631  | 0.62 | 1  | 65-90(0.62)                                                                                                                                                                   |
| gnl UG Hs#S2293870  | 2.5  | 2  | 122-148(0.86) 158-184(2.50)                                                                                                                                                   |
| gnl UG Hs#S7111178  | 1.26 | 1  | 134-159(1.26)                                                                                                                                                                 |
| gnl UG Hs#S1731715  | 1.3  | 4  | 269-294(1.30) 493-519(0.44) 946-971(0.65) 1100-1125(0.98)                                                                                                                     |
| gnl UG Hs#S3439086  | 0.13 | 1  | 505-531(0.13)                                                                                                                                                                 |
| gnl UG Hs#S4614378  | 2.2  | 4  | 419-444(2.20) 462-487(1.47) 662-690(0.23) 1200-1225(0.30)                                                                                                                     |
| gnl UG Hs#S1727794  | 1.2  | 2  | 573-599(1.20) 756-781(0.04)                                                                                                                                                   |
| gnl UG Hs#S4615079  | 3.85 | 3  | 115-141(0.27) 570-595(3.85) 1000-1025(1.56)                                                                                                                                   |
| gnl UG Hs#S3333498  | 4.14 | 11 | 888-916(0.66) 1004-1030(0.26) 1078-1102(3.11) 1308-1333(1.32) 1354-1380(0.30) 1663-1688(4.14) 1737-1762(0.40) 2169-2196(0.52) 2508-2534(3.62) 3409-3434(0.65) 3582-3608(0.56) |
| gnl UG Hs#S3219229  | 1.4  | 1  | 138-163(1.40)                                                                                                                                                                 |
| gnl UG Hs#S15115719 | 3.62 | 2  | 219-244(3.62) 321-346(0.57)                                                                                                                                                   |
| gnl UG Hs#S15639942 | 2.08 | 1  | 152-178(2.08)                                                                                                                                                                 |
| gnl UG Hs#S1731090  | 3.33 | 2  | 487-513(3.33) 536-561(1.49)                                                                                                                                                   |
| gnl UG Hs#S2293448  | 0.84 | 1  | 553-578(0.84)                                                                                                                                                                 |
| gnl UG Hs#S5978631  | 1.23 | 2  | 412-437(0.30) 3328-3354(1.23)                                                                                                                                                 |
| gnl UG Hs#S1731461  | 0.12 | 1  | 536-562(0.12)                                                                                                                                                                 |
| gnl UG Hs#S1730984  | 0.94 | 1  | 34-63(0.94)                                                                                                                                                                   |
| gnl UG Hs#S1728813  | 0.43 | 1  | 129-155(0.43)                                                                                                                                                                 |
| gnl UG Hs#S1732026  | 3.36 | 3  | 242-268(0.04) 735-762(3.36) 798-823(0.55)                                                                                                                                     |
| gnl UG Hs#S10832093 | 1.5  | 1  | 65-93(1.50)                                                                                                                                                                   |
| gnl UG Hs#S5930818  | 3.46 | 6  | 731-760(0.30) 1460-1485(1.20) 1950-1979(0.05) 3488-3513(0.72) 4468-4493(1.62) 4600-4625(3.46)                                                                                 |
| gnl UG Hs#S1727169  | 0.13 | 1  | 213-238(0.13)                                                                                                                                                                 |
| gnl UG Hs#S5978626  | 4.37 | 8  | 767-791(3.75) 921-946(0.40) 1202-1228(0.97) 1436-1461(0.26) 2186-2212(4.37) 2258-2284(0.30) 2443-2468(3.53) 2839-2864(0.84)                                                   |
| gnl UG Hs#S2138672  | 0.33 | 1  | 59-84(0.33)                                                                                                                                                                   |
| gnl UG Hs#S15631677 | 2.35 | 2  | 2020-2045(2.35) 2217-2242(0.74)                                                                                                                                               |
| gnl UG Hs#S3973103  | 0.82 | 1  | 316-341(0.82)                                                                                                                                                                 |
| gnl UG Hs#S4273     | 1.97 | 1  | 1118-1143(1.97)                                                                                                                                                               |
| gnl UG Hs#S4806548  | 2.3  | 1  | 686-712(2.30)                                                                                                                                                                 |

|                     |      |                                                                                                                                                              |
|---------------------|------|--------------------------------------------------------------------------------------------------------------------------------------------------------------|
| gnl UG Hs#S2293787  | 1.82 | 1 155-181(1.82)                                                                                                                                              |
| gnl UG Hs#S7111834  | 1.19 | 1 910-940(1.19)                                                                                                                                              |
| gnl UG Hs#S14813045 | 1.33 | 2 2040-2065(1.33) 3765-3790(1.01)                                                                                                                            |
| gnl UG Hs#S3220037  | 1.53 | 1 106-131(1.53)                                                                                                                                              |
| gnl UG Hs#S3220019  | 1.9  | 6 43-68(1.90) 714-741(0.20) 1647-1673(1.43) 2387-2415(1.66) 2683-2711(1.74) 2789-2817(0.01)                                                                  |
| gnl UG Hs#S2294424  | 0.43 | 2 432-459(0.13) 585-613(0.43)                                                                                                                                |
| gnl UG Hs#S2294335  | 1.98 | 2 215-243(1.66) 685-710(1.98)                                                                                                                                |
| gnl UG Hs#S1824394  | 1.71 | 3 246-274(0.66) 622-650(1.71) 777-802(0.11)                                                                                                                  |
| gnl UG Hs#S4631515  | 0.03 | 1 456-481(0.03)                                                                                                                                              |
| gnl UG Hs#S1731545  | 3.91 | 5 138-163(0.79) 436-461(3.91) 483-511(0.84) 518-543(1.40) 1190-1215(0.53)                                                                                    |
| gnl UG Hs#S5978593  | 1.2  | 2 2616-2641(1.20) 2848-2873(0.98)                                                                                                                            |
| gnl UG Hs#S3219181  | 0.17 | 1 281-306(0.17)                                                                                                                                              |
| gnl UG Hs#S2139821  | 4.53 | 5 188-213(0.17) 326-351(4.53) 697-723(0.62) 2708-2734(3.33) 3298-3324(0.46)                                                                                  |
| gnl UG Hs#S4807834  | 1.99 | 1 158-185(1.99)                                                                                                                                              |
| gnl UG Hs#S11046740 | 1.82 | 1 245-271(1.82)                                                                                                                                              |
| gnl UG Hs#S3439037  | 1.89 | 3 705-730(1.89) 774-799(1.72) 952-977(0.66)                                                                                                                  |
| gnl UG Hs#S3602291  | 2.11 | 9 598-623(1.08) 688-711(2.11) 805-830(0.23) 1201-1226(0.66) 1574-1603(0.88) 1632-1659(0.56) 1789-1816(1.49) 1981-2007(0.72) 2355-2380(0.52)                  |
| gnl UG Hs#S3219450  | 6.03 | 3 203-228(1.78) 1141-1166(0.46) 2761-2787(6.03)                                                                                                              |
| gnl UG Hs#S15633955 | 1.39 | 1 108-134(1.39)                                                                                                                                              |
| gnl UG Hs#S3438708  | 4.57 | 1 260-286(4.57)                                                                                                                                              |
| gnl UG Hs#S3601486  | 0.3  | 1 145-170(0.30)                                                                                                                                              |
| gnl UG Hs#S3619348  | 0.4  | 1 435-461(0.40)                                                                                                                                              |
| gnl UG Hs#S4392025  | 0.08 | 1 979-1007(0.08)                                                                                                                                             |
| gnl UG Hs#S1731900  | 0.13 | 1 46-71(0.13)                                                                                                                                                |
| gnl UG Hs#S1731132  | 2.66 | 2 383-408(2.66) 569-597(1.66)                                                                                                                                |
| gnl UG Hs#S6163297  | 0.5  | 1 398-422(0.50)                                                                                                                                              |
| gnl UG Hs#S3905470  | 0.96 | 4 638-664(0.12) 703-731(0.96) 741-769(0.10) 949-974(0.20)                                                                                                    |
| gnl UG Hs#S6693364  | 1.26 | 2 2449-2474(0.98) 2517-2542(1.26)                                                                                                                            |
| gnl UG Hs#S1569499  | 3.3  | 3 1481-1506(0.55) 4039-4064(3.30) 4071-4097(0.26)                                                                                                            |
| gnl UG Hs#S2293600  | 2.52 | 1 85-113(2.52)                                                                                                                                               |
| gnl UG Hs#S2139147  | 1.59 | 1 803-831(1.59)                                                                                                                                              |
| gnl UG Hs#S1730892  | 1.3  | 1 6402-6430(1.30)                                                                                                                                            |
| gnl UG Hs#S1728772  | 1.3  | 4 344-369(1.30) 612-637(0.68) 752-777(1.05) 1085-1111(1.17)                                                                                                  |
| gnl UG Hs#S1726740  | 0.03 | 1 11-37(0.03)                                                                                                                                                |
| gnl UG Hs#S15638164 | 3.5  | 2 595-623(1.88) 2742-2768(3.50)                                                                                                                              |
| gnl UG Hs#S1730595  | 4.42 | 1 167-194(4.42)                                                                                                                                              |
| gnl UG Hs#S4824394  | 2.79 | 10 362-387(2.79) 590-616(1.41) 759-784(0.32) 1267-1292(0.68) 1654-1679(1.46) 1694-1722(0.72) 1865-1890(2.20) 1921-1946(0.98) 2354-2379(0.33) 2512-2538(0.72) |
| gnl UG Hs#S2294670  | 0.5  | 1 396-421(0.50)                                                                                                                                              |
| gnl UG Hs#S1728111  | 4.57 | 1 182-210(4.57)                                                                                                                                              |
| gnl UG Hs#S3881031  | 3.04 | 1 461-486(3.04)                                                                                                                                              |
| gnl UG Hs#S15638319 | 2.34 | 1 319-344(2.34)                                                                                                                                              |
| gnl UG Hs#S3603202  | 0.52 | 2 571-596(0.33) 898-924(0.52)                                                                                                                                |
| gnl UG Hs#S1732053  | 1.1  | 5 218-243(0.72) 292-317(0.63) 1957-1982(0.34) 2379-2407(0.61) 3241-3268(1.10)                                                                                |
| gnl UG Hs#S1732387  | 1.56 | 2 50-78(1.56) 380-405(1.27)                                                                                                                                  |
| gnl UG Hs#S3219931  | 1.79 | 4 509-534(1.59) 660-687(1.79) 720-748(0.48) 969-994(0.97)                                                                                                    |
| gnl UG Hs#S1727116  | 4.15 | 3 34-60(0.14) 160-185(0.23) 227-253(4.15)                                                                                                                    |
| gnl UG Hs#S3547255  | 3.34 | 2 804-830(3.34) 1611-1636(2.72)                                                                                                                              |
| gnl UG Hs#S1728118  | 3.36 | 4 1772-1798(1.08) 1818-1843(0.41) 3299-3324(3.36) 4439-4467(0.17)                                                                                            |
| gnl UG Hs#S2294209  | 6.18 | 1 1899-1925(6.18)                                                                                                                                            |
| gnl UG Hs#S7111451  | 1.4  | 1 607-632(1.40)                                                                                                                                              |
| gnl UG Hs#S1732254  | 0.27 | 2 204-228(0.19) 562-590(0.27)                                                                                                                                |
| gnl UG Hs#S1728555  | 2.08 | 1 466-492(2.08)                                                                                                                                              |
| gnl UG Hs#S15643743 | 2.11 | 8 895-919(1.56) 1158-1183(0.23) 2094-2120(0.82) 2245-2272(1.03) 2352-2377(1.72) 2441-2466(0.11) 2514-2540(1.50) 2604-2629(2.11)                              |
| gnl UG Hs#S1730515  | 1.63 | 1 31-54(1.63)                                                                                                                                                |



|                     |      |                                                                                                   |
|---------------------|------|---------------------------------------------------------------------------------------------------|
| gnl UG Hs#S1731933  | 2.17 | 2 42-67(0.67) 518-543(2.17)                                                                       |
| gnl UG Hs#S3219434  | 1.08 | 1 108-133(1.08)                                                                                   |
| gnl UG Hs#S5978534  | 2.04 | 1 1769-1794(2.04)                                                                                 |
| gnl UG Hs#S2139538  | 2.43 | 6 1655-1680(0.82) 2289-2314(1.84) 2442-2468(1.40) 2482-2507(2.11) 2597-2628(2.43) 2678-2705(2.34) |
| gnl UG Hs#S10831706 | 2.17 | 2 274-299(2.13) 859-885(2.17)                                                                     |
| gnl UG Hs#S1726662  | 0.26 | 1 816-841(0.26)                                                                                   |
| gnl UG Hs#S3219436  | 0.27 | 2 1303-1329(0.08) 1444-1472(0.27)                                                                 |
| gnl UG Hs#S3439033  | 2.46 | 2 445-470(2.46) 572-597(1.08)                                                                     |
| gnl UG Hs#S1727774  | 3.46 | 1 1141-1166(3.46)                                                                                 |
| gnl UG Hs#S3814671  | 0.44 | 1 1081-1109(0.44)                                                                                 |
| gnl UG Hs#S1728217  | 7.72 | 3 112-140(0.08) 1351-1376(1.14) 1727-1752(7.72)                                                   |
| gnl UG Hs#S3940486  | 4.39 | 3 25-51(4.39) 544-569(0.33) 1327-1353(1.59)                                                       |
| gnl UG Hs#S1728395  | 2.17 | 3 668-693(1.21) 992-1017(2.17) 1169-1196(1.14)                                                    |
| gnl UG Hs#S4283229  | 2.14 | 2 90-115(2.14) 1219-1243(1.13)                                                                    |
| gnl UG Hs#S3220170  | 1.57 | 1 124-150(1.57)                                                                                   |
| gnl UG Hs#S1972896  | 2.08 | 1 146-171(2.08)                                                                                   |
| gnl UG Hs#S1726962  | 1.98 | 2 118-144(1.98) 303-328(1.01)                                                                     |
| gnl UG Hs#S15639796 | 1.13 | 2 540-565(1.13) 680-705(0.39)                                                                     |
| gnl UG Hs#S3973068  | 1.75 | 3 1251-1277(1.75) 1427-1455(0.49) 1732-1760(0.81)                                                 |
| gnl UG Hs#S3542630  | 1.55 | 3 540-566(1.55) 862-890(0.17) 921-947(0.01)                                                       |
| gnl UG Hs#S816222   | 0.87 | 1 40-63(0.87)                                                                                     |
| gnl UG Hs#S1728537  | 0.04 | 1 15-37(0.04)                                                                                     |
| gnl UG Hs#S7111472  | 0.36 | 1 677-700(0.36)                                                                                   |
| gnl UG Hs#S2140406  | 0.3  | 1 261-286(0.30)                                                                                   |
| gnl UG Hs#S1729866  | 0.81 | 1 625-651(0.81)                                                                                   |
| gnl UG Hs#S15631403 | 2.82 | 1 98-123(2.82)                                                                                    |
| gnl UG Hs#S4807924  | 0.14 | 2 19-44(0.14) 390-415(0.13)                                                                       |
| gnl UG Hs#S5978508  | 3.79 | 6 296-321(2.87) 346-371(3.79) 404-432(2.36) 613-638(0.08) 1402-1427(3.04) 1442-1467(1.72)         |
| gnl UG Hs#S5979194  | 0.81 | 1 450-475(0.81)                                                                                   |
| gnl UG Hs#S1728034  | 1.17 | 1 212-237(1.17)                                                                                   |
| gnl UG Hs#S11046677 | 0.72 | 1 526-553(0.72)                                                                                   |
| gnl UG Hs#S3601601  | 1.65 | 2 707-733(1.65) 1067-1095(0.04)                                                                   |
| gnl UG Hs#S1731503  | 0.17 | 1 321-347(0.17)                                                                                   |
| gnl UG Hs#S2138782  | 2.13 | 2 424-449(2.13) 528-553(0.91)                                                                     |
| gnl UG Hs#S3817945  | 0.57 | 1 622-647(0.57)                                                                                   |
| gnl UG Hs#S2140578  | 2.94 | 5 189-214(0.08) 993-1019(0.62) 1052-1081(0.61) 1741-1767(2.94) 1943-1968(1.48)                    |
| gnl UG Hs#S2140291  | 1.15 | 4 149-174(1.15) 197-222(1.00) 1346-1371(0.14) 1583-1608(0.28)                                     |
| gnl UG Hs#S1728631  | 0.5  | 1 257-283(0.50)                                                                                   |
| gnl UG Hs#S3881188  | 2.3  | 1 306-331(2.30)                                                                                   |
| gnl UG Hs#S1730790  | 1.65 | 2 377-403(0.14) 1067-1092(1.65)                                                                   |
| gnl UG Hs#S1729786  | 3.72 | 4 120-145(1.32) 201-227(0.21) 606-631(3.72) 674-703(1.30)                                         |
| gnl UG Hs#S4826019  | 3.33 | 4 651-677(1.15) 2290-2316(0.43) 2428-2455(3.33) 2519-2544(0.33)                                   |
| gnl UG Hs#S4554469  | 3.42 | 3 183-211(1.08) 545-571(3.42) 1121-1149(0.69)                                                     |
| gnl UG Hs#S1824507  | 1.45 | 2 159-185(1.45) 308-333(0.94)                                                                     |
| gnl UG Hs#S3438746  | 2.5  | 1 2710-2736(2.50)                                                                                 |
| gnl UG Hs#S4807693  | 2.3  | 4 24-52(0.84) 535-561(2.30) 661-687(1.30) 879-904(1.26)                                           |
| gnl UG Hs#S15641848 | 0.81 | 1 412-440(0.81)                                                                                   |
| gnl UG Hs#S15636794 | 0.98 | 1 672-697(0.98)                                                                                   |
| gnl UG Hs#S3601484  | 3.04 | 1 121-147(3.04)                                                                                   |
| gnl UG Hs#S5517495  | 0.79 | 1 1708-1733(0.79)                                                                                 |
| gnl UG Hs#S6158553  | 3.3  | 5 96-122(3.30) 511-536(2.40) 1235-1260(1.89) 2001-2026(0.90) 3041-3069(0.53)                      |
| gnl UG Hs#S2293405  | 0.91 | 1 207-233(0.91)                                                                                   |
| gnl UG Hs#S2139550  | 1.17 | 1 334-360(1.17)                                                                                   |
| gnl UG Hs#S3817928  | 2.23 | 4 409-435(0.49) 649-672(2.23) 693-718(0.11) 1612-1638(2.08)                                       |

|                     |      |   |                                                                                                                                             |
|---------------------|------|---|---------------------------------------------------------------------------------------------------------------------------------------------|
| gnl UG Hs#S15638669 | 0.72 | 1 | 1147-1173(0.72)                                                                                                                             |
| gnl UG Hs#S1728000  | 3.81 | 1 | 592-620(3.81)                                                                                                                               |
| gnl UG Hs#S4617047  | 0.13 | 1 | 1081-1106(0.13)                                                                                                                             |
| gnl UG Hs#S3219954  | 0.49 | 2 | 89-113(0.49) 228-257(0.43)                                                                                                                  |
| gnl UG Hs#S4807913  | 2.56 | 2 | 250-276(0.63) 1511-1535(2.56)                                                                                                               |
| gnl UG Hs#S3542660  | 0.66 | 3 | 254-278(0.66) 584-609(0.37) 614-641(0.24)                                                                                                   |
| gnl UG Hs#S4807588  | 1.34 | 1 | 20-45(1.34)                                                                                                                                 |
| gnl UG Hs#S3438832  | 0.27 | 1 | 2088-2115(0.27)                                                                                                                             |
| gnl UG Hs#S2140222  | 1.1  | 1 | 1-27(1.10)                                                                                                                                  |
| gnl UG Hs#S4621382  | 2.2  | 3 | 31-56(2.20) 112-140(1.30) 713-738(0.07)                                                                                                     |
| gnl UG Hs#S1729083  | 1.5  | 2 | 420-445(1.50) 1695-1720(1.04)                                                                                                               |
| gnl UG Hs#S4435934  | 1.43 | 1 | 106-132(1.43)                                                                                                                               |
| gnl UG Hs#S1728394  | 4.82 | 9 | 335-360(1.17) 420-446(0.27) 1908-1934(3.93) 2058-2083(0.48) 2138-2163(4.82) 2278-2303(1.52) 2502-2527(0.32) 2534-2557(1.40) 2603-2628(1.08) |
| gnl UG Hs#S1729123  | 1.89 | 6 | 796-824(0.20) 847-873(0.14) 881-909(0.18) 1015-1040(0.85) 1041-1066(1.89) 1203-1229(0.08)                                                   |
| gnl UG Hs#S2293729  | 5.21 | 4 | 110-138(0.23) 191-216(3.37) 776-803(0.16) 1024-1049(5.21)                                                                                   |
| gnl UG Hs#S6163454  | 1.13 | 2 | 61-86(1.13) 93-121(0.07)                                                                                                                    |
| gnl UG Hs#S1973419  | 0.27 | 1 | 781-807(0.27)                                                                                                                               |
| gnl UG Hs#S4827985  | 1.24 | 2 | 1145-1171(1.04) 1625-1652(1.24)                                                                                                             |
| gnl UG Hs#S4613283  | 0.57 | 2 | 235-261(0.57) 416-444(0.03)                                                                                                                 |
| gnl UG Hs#S2138842  | 4.16 | 1 | 3564-3590(4.16)                                                                                                                             |
| gnl UG Hs#S3547083  | 0.5  | 1 | 8-33(0.50)                                                                                                                                  |
| gnl UG Hs#S3438484  | 2.86 | 4 | 247-270(2.47) 1349-1375(0.59) 2492-2517(2.17) 3260-3286(2.86)                                                                               |
| gnl UG Hs#S3547097  | 0.52 | 1 | 192-220(0.52)                                                                                                                               |
| gnl UG Hs#S2294042  | 0.13 | 1 | 394-419(0.13)                                                                                                                               |
| gnl UG Hs#S1727213  | 0.72 | 1 | 51-76(0.72)                                                                                                                                 |
| gnl UG Hs#S1726623  | 2.71 | 3 | 649-672(2.27) 1221-1249(2.71) 1583-1608(0.94)                                                                                               |
| gnl UG Hs#S3601650  | 0.58 | 1 | 808-833(0.58)                                                                                                                               |
| gnl UG Hs#S2294180  | 1.57 | 2 | 242-267(1.30) 476-501(1.57)                                                                                                                 |
| gnl UG Hs#S2293744  | 1.01 | 2 | 610-633(0.70) 1267-1292(1.01)                                                                                                               |
| gnl UG Hs#S3438890  | 0.5  | 1 | 438-463(0.50)                                                                                                                               |
| gnl UG Hs#S2139547  | 3.13 | 4 | 659-684(0.26) 868-893(3.13) 983-1011(0.04) 1633-1658(1.98)                                                                                  |
| gnl UG Hs#S3355623  | 1.72 | 1 | 733-758(1.72)                                                                                                                               |
| gnl UG Hs#S4817817  | 1.65 | 2 | 549-575(1.50) 1132-1157(1.65)                                                                                                               |
| gnl UG Hs#S4283558  | 0.55 | 1 | 1554-1582(0.55)                                                                                                                             |
| gnl UG Hs#S2293662  | 2.94 | 7 | 92-117(1.72) 576-601(0.33) 1238-1263(2.94) 1447-1473(0.08) 1606-1633(0.34) 1674-1699(0.82) 1922-1947(0.79)                                  |
| gnl UG Hs#S15638204 | 3.82 | 3 | 554-579(0.47) 666-693(1.72) 911-937(3.82)                                                                                                   |
| gnl UG Hs#S3803176  | 4.04 | 1 | 314-339(4.04)                                                                                                                               |
| gnl UG Hs#S4631295  | 4.55 | 2 | 1170-1196(3.27) 1314-1340(4.55)                                                                                                             |
| gnl UG Hs#S4823941  | 1.72 | 2 | 79-104(1.72) 1247-1275(0.52)                                                                                                                |
| gnl UG Hs#S3618438  | 0.27 | 1 | 96-122(0.27)                                                                                                                                |
| gnl UG Hs#S5978516  | 1.75 | 4 | 311-336(0.72) 1297-1322(1.75) 1456-1481(0.17) 2043-2068(0.07)                                                                               |
| gnl UG Hs#S15631404 | 0.17 | 1 | 320-345(0.17)                                                                                                                               |
| gnl UG Hs#S15730310 | 1.55 | 2 | 6821-6849(0.57) 7182-7208(1.55)                                                                                                             |
| gnl UG Hs#S14802371 | 4.24 | 3 | 898-924(1.33) 1213-1238(1.85) 1291-1320(4.24)                                                                                               |
| gnl UG Hs#S2139923  | 0.04 | 1 | 137-162(0.04)                                                                                                                               |
| gnl UG Hs#S4546008  | 3.52 | 2 | 425-452(3.52) 618-643(1.13)                                                                                                                 |
| gnl UG Hs#S3619140  | 0.72 | 1 | 166-191(0.72)                                                                                                                               |
| gnl UG Hs#S2293539  | 2.3  | 4 | 1047-1073(0.34) 1103-1128(2.30) 1284-1309(1.20) 1473-1500(0.61)                                                                             |
| gnl UG Hs#S1729201  | 1.59 | 4 | 316-341(1.59) 378-404(1.03) 406-432(0.34) 513-538(1.50)                                                                                     |
| gnl UG Hs#S4831136  | 1.91 | 5 | 2078-2104(1.24) 2146-2171(0.04) 2811-2834(1.13) 2855-2883(0.94) 2931-2956(1.91)                                                             |
| gnl UG Hs#S7113306  | 0.52 | 1 | 154-179(0.52)                                                                                                                               |
| gnl UG Hs#S3439061  | 1.1  | 2 | 1371-1396(0.62) 1785-1809(1.10)                                                                                                             |
| gnl UG Hs#S15631803 | 0.34 | 1 | 813-839(0.34)                                                                                                                               |
| gnl UG Hs#S1729547  | 2.4  | 2 | 1891-1916(0.21) 2192-2218(2.40)                                                                                                             |

|                     |      |                                                                                                                               |
|---------------------|------|-------------------------------------------------------------------------------------------------------------------------------|
| gnl UG Hs#S2139632  | 5.36 | 8 691-719(0.49) 778-803(0.14) 1142-1167(0.43) 1411-1436(5.36) 2049-2073(2.47) 2273-2301(1.40) 2652-2680(2.40) 2730-2755(2.53) |
| gnl UG Hs#S4814621  | 1.07 | 3 940-965(0.49) 1502-1530(0.55) 1678-1705(1.07)                                                                               |
| gnl UG Hs#S2140058  | 1.45 | 3 132-158(0.82) 474-499(1.45) 867-892(0.76)                                                                                   |
| gnl UG Hs#S4616406  | 0.53 | 1 47-72(0.53)                                                                                                                 |
| gnl UG Hs#S1728371  | 0.97 | 1 510-536(0.97)                                                                                                               |
| gnl UG Hs#S1727810  | 3.56 | 5 303-328(3.56) 630-655(1.46) 686-714(1.82) 1572-1597(1.57) 1715-1743(0.81)                                                   |
| gnl UG Hs#S4822051  | 0.67 | 1 1059-1085(0.67)                                                                                                             |
| gnl UG Hs#S2139629  | 4.04 | 1 570-595(4.04)                                                                                                               |
| gnl UG Hs#S15638749 | 2    | 4 97-122(1.50) 485-510(1.52) 692-720(2.00) 725-750(1.89)                                                                      |
| gnl UG Hs#S15643310 | 1.58 | 2 352-380(0.88) 2974-3000(1.58)                                                                                               |
| gnl UG Hs#S1726670  | 0.01 | 1 674-700(0.01)                                                                                                               |
| gnl UG Hs#S2293681  | 3.3  | 1 598-623(3.30)                                                                                                               |
| gnl UG Hs#S4840397  | 0.29 | 1 422-448(0.29)                                                                                                               |
| gnl UG Hs#S4553540  | 2.04 | 2 30-55(1.40) 435-460(2.04)                                                                                                   |
| gnl UG Hs#S4828882  | 1.97 | 3 697-722(1.97) 774-799(0.72) 1141-1167(0.07)                                                                                 |
| gnl UG Hs#S1726659  | 1.72 | 2 595-619(1.72) 639-667(0.50)                                                                                                 |
| gnl UG Hs#S3940063  | 0.11 | 1 95-118(0.11)                                                                                                                |
| gnl UG Hs#S2139770  | 0.98 | 1 254-282(0.98)                                                                                                               |
| gnl UG Hs#S11046557 | 0.13 | 1 113-137(0.13)                                                                                                               |
| gnl UG Hs#S2293733  | 3.52 | 2 232-257(3.52) 305-331(0.58)                                                                                                 |
| gnl UG Hs#S1726854  | 2.26 | 1 206-231(2.26)                                                                                                               |
| gnl UG Hs#S3619160  | 2.89 | 4 290-316(2.89) 502-528(1.69) 735-762(1.03) 827-852(0.30)                                                                     |
| gnl UG Hs#S4811365  | 0.68 | 1 887-912(0.68)                                                                                                               |
| gnl UG Hs#S3993520  | 2.4  | 2 313-339(0.36) 451-476(2.40)                                                                                                 |
| gnl UG Hs#S3219754  | 0.43 | 1 118-143(0.43)                                                                                                               |
| gnl UG Hs#S3905487  | 2    | 2 125-150(2.00) 256-281(1.23)                                                                                                 |
| gnl UG Hs#S1730725  | 2.43 | 1 630-656(2.43)                                                                                                               |
| gnl UG Hs#S10831652 | 1.13 | 1 901-926(1.13)                                                                                                               |
| gnl UG Hs#S4554440  | 1.33 | 4 82-107(1.16) 597-622(0.81) 1328-1354(0.15) 1596-1624(1.33)                                                                  |
| gnl UG Hs#S4619825  | 1.3  | 2 658-684(0.79) 1213-1241(1.30)                                                                                               |
| gnl UG Hs#S4808753  | 3.94 | 4 63-89(1.94) 1832-1857(3.94) 1937-1965(1.48) 1970-1996(1.16)                                                                 |
| gnl UG Hs#S3438734  | 6.23 | 1 285-311(6.23)                                                                                                               |
| gnl UG Hs#S4807881  | 2.08 | 1 256-282(2.08)                                                                                                               |
| gnl UG Hs#S4824725  | 0.55 | 1 497-523(0.55)                                                                                                               |
| gnl UG Hs#S4046145  | 0.2  | 1 1057-1084(0.20)                                                                                                             |
| gnl UG Hs#S4810792  | 3.62 | 7 412-440(0.81) 702-728(1.58) 1410-1438(0.81) 1580-1606(3.62) 2280-2308(0.04) 2439-2464(1.34) 2524-2549(0.33)                 |
| gnl UG Hs#S1729933  | 1.43 | 1 535-560(1.43)                                                                                                               |
| gnl UG Hs#S2293238  | 1.52 | 2 149-175(1.52) 281-304(0.30)                                                                                                 |
| gnl UG Hs#S3438949  | 1.5  | 1 136-161(1.50)                                                                                                               |
| gnl UG Hs#S1729520  | 0.4  | 1 283-309(0.40)                                                                                                               |
| gnl UG Hs#S3438354  | 0.23 | 2 818-845(0.17) 1019-1043(0.23)                                                                                               |
| gnl UG Hs#S1732045  | 2.05 | 2 458-486(0.97) 771-796(2.05)                                                                                                 |
| gnl UG Hs#S1731951  | 5.91 | 6 688-714(1.40) 801-831(2.20) 946-972(0.23) 1026-1051(5.91) 1075-1101(2.30) 2160-2187(0.40)                                   |
| gnl UG Hs#S2293528  | 4.07 | 4 337-362(0.17) 575-602(4.07) 703-728(0.04) 894-919(0.87)                                                                     |
| gnl UG Hs#S2139157  | 0.85 | 1 132-159(0.85)                                                                                                               |
| gnl UG Hs#S4819878  | 3.01 | 4 329-355(0.15) 1069-1095(1.40) 1381-1406(0.40) 4169-4194(3.01)                                                               |
| gnl UG Hs#S4807684  | 4.52 | 4 1075-1101(4.52) 1737-1763(1.05) 1799-1824(1.98) 1860-1886(0.82)                                                             |
| gnl UG Hs#S3439927  | 3.89 | 5 63-91(0.85) 226-251(3.89) 292-317(2.39) 355-380(2.62) 325-350(0.07)                                                         |
| gnl UG Hs#S3603744  | 0.99 | 2 701-726(0.72) 935-961(0.99)                                                                                                 |
| gnl UG Hs#S1730174  | 1.63 | 2 764-789(1.63) 1111-1137(1.06)                                                                                               |
| gnl UG Hs#S3438571  | 3.53 | 4 185-210(2.68) 1550-1575(2.04) 2057-2082(3.53) 2699-2723(0.47)                                                               |
| gnl UG Hs#S2293624  | 2.98 | 2 227-254(0.14) 401-426(2.98)                                                                                                 |
| gnl UG Hs#S14802630 | 2.13 | 2 1552-1577(2.13) 1587-1614(0.76)                                                                                             |
| gnl UG Hs#S3219103  | 8.83 | 3 375-401(0.47) 416-441(0.04) 548-574(8.83)                                                                                   |

|                     |      |                                                                                                         |
|---------------------|------|---------------------------------------------------------------------------------------------------------|
| gnl UG Hs#S1731996  | 1.4  | 3 235-261(0.94) 3854-3877(0.89) 3892-3920(1.40)                                                         |
| gnl UG Hs#S1732234  | 2.91 | 2 992-1017(0.20) 1514-1540(2.91)                                                                        |
| gnl UG Hs#S4807843  | 0.5  | 1 466-491(0.50)                                                                                         |
| gnl UG Hs#S1726344  | 3.91 | 5 669-695(3.91) 701-727(2.86) 1054-1080(0.13) 1232-1258(1.76) 1278-1303(0.18)                           |
| gnl UG Hs#S3218982  | 0.14 | 1 49-74(0.14)                                                                                           |
| gnl UG Hs#S2139622  | 3.2  | 4 167-195(2.33) 2033-2058(3.20) 2555-2583(0.49) 3938-3963(1.91)                                         |
| gnl UG Hs#S3603187  | 0.5  | 1 124-150(0.50)                                                                                         |
| gnl UG Hs#S1729192  | 0.18 | 1 446-471(0.18)                                                                                         |
| gnl UG Hs#S1728360  | 1.4  | 1 450-476(1.40)                                                                                         |
| gnl UG Hs#S13588635 | 0.32 | 2 677-702(0.20) 825-853(0.32)                                                                           |
| gnl UG Hs#S4807616  | 0.2  | 1 656-679(0.20)                                                                                         |
| gnl UG Hs#S3355481  | 0.26 | 1 166-191(0.26)                                                                                         |
| gnl UG Hs#S14272723 | 2.77 | 4 6-31(0.26) 326-352(2.77) 1386-1412(2.24) 1697-1722(0.84)                                              |
| gnl UG Hs#S4553118  | 3.85 | 5 1964-1989(1.55) 2038-2066(0.98) 2153-2177(2.69) 2477-2502(3.85) 2513-2538(1.72)                       |
| gnl UG Hs#S15639611 | 5.81 | 1 182-210(5.81)                                                                                         |
| gnl UG Hs#S2293396  | 2.63 | 5 153-178(1.39) 255-280(2.63) 791-818(0.03) 1970-1997(2.21) 3297-3322(0.23)                             |
| gnl UG Hs#S3603843  | 2.15 | 4 619-643(0.39) 649-672(0.21) 1620-1645(1.57) 1942-1967(2.15)                                           |
| gnl UG Hs#S2293948  | 1.46 | 1 1662-1688(1.46)                                                                                       |
| gnl UG Hs#S3219938  | 3.49 | 1 620-646(3.49)                                                                                         |
| gnl UG Hs#S1727049  | 5.53 | 1 234-262(5.53)                                                                                         |
| gnl UG Hs#S4807969  | 3.08 | 2 95-121(0.27) 239-264(3.08)                                                                            |
| gnl UG Hs#S11590846 | 1.58 | 3 414-440(0.50) 448-474(0.69) 637-661(1.58)                                                             |
| gnl UG Hs#S4807576  | 2.01 | 2 516-544(0.91) 1215-1243(2.01)                                                                         |
| gnl UG Hs#S1726694  | 0.17 | 1 95-120(0.17)                                                                                          |
| gnl UG Hs#S1732228  | 0.82 | 1 3-28(0.82)                                                                                            |
| gnl UG Hs#S15642158 | 3.3  | 3 25-50(0.30) 268-296(3.30) 348-373(1.90)                                                               |
| gnl UG Hs#S1727825  | 1.15 | 1 331-356(1.15)                                                                                         |
| gnl UG Hs#S3220071  | 0.55 | 1 143-168(0.55)                                                                                         |
| gnl UG Hs#S1731457  | 1.17 | 1 421-447(1.17)                                                                                         |
| gnl UG Hs#S4554589  | 2.68 | 1 735-761(2.68)                                                                                         |
| gnl UG Hs#S4285318  | 0.76 | 1 1946-1971(0.76)                                                                                       |
| gnl UG Hs#S472705   | 3.53 | 3 697-723(0.24) 1911-1936(1.72) 2519-2544(3.53)                                                         |
| gnl UG Hs#S1730149  | 1.79 | 5 66-91(1.19) 389-416(0.14) 892-918(1.79) 1155-1180(1.21) 1229-1254(1.13)                               |
| gnl UG Hs#S4284324  | 1.48 | 1 653-678(1.48)                                                                                         |
| gnl UG Hs#S1729517  | 0.23 | 1 89-117(0.23)                                                                                          |
| gnl UG Hs#S10832555 | 1.27 | 3 171-199(1.27) 484-510(0.08) 572-596(0.65)                                                             |
| gnl UG Hs#S15644378 | 1.98 | 2 114-136(1.10) 1092-1117(1.98)                                                                         |
| gnl UG Hs#S5978603  | 0.49 | 2 194-219(0.39) 359-385(0.49)                                                                           |
| gnl UG Hs#S15636758 | 3.65 | 7 213-238(1.30) 254-279(3.65) 482-507(3.04) 521-546(1.52) 915-941(2.04) 2023-2048(2.08) 2281-2306(1.17) |
| gnl UG Hs#S11046701 | 0.34 | 1 2346-2373(0.34)                                                                                       |
| gnl UG Hs#S3825996  | 2.68 | 5 311-336(0.13) 546-571(2.68) 755-778(0.04) 1629-1656(0.43) 1968-1993(0.79)                             |
| gnl UG Hs#S1973073  | 3.14 | 3 391-416(3.14) 1661-1686(0.04) 1939-1964(2.40)                                                         |
| gnl UG Hs#S5978674  | 1.26 | 2 1276-1301(1.26) 1482-1507(1.18)                                                                       |
| gnl UG Hs#S1731221  | 1.36 | 3 238-264(1.36) 410-434(0.27) 511-537(0.82)                                                             |
| gnl UG Hs#S3355668  | 1.84 | 1 1249-1275(1.84)                                                                                       |
| gnl UG Hs#S3619253  | 3.56 | 2 377-402(3.56) 404-431(0.20)                                                                           |
| gnl UG Hs#S15631734 | 2.05 | 2 316-341(2.05) 2103-2128(1.50)                                                                         |
| gnl UG Hs#S1727366  | 0.46 | 3 353-378(0.46) 608-634(0.01) 643-669(0.13)                                                             |
| gnl UG Hs#S4807649  | 1.86 | 3 168-196(0.13) 460-485(1.25) 986-1012(1.86)                                                            |
| gnl UG Hs#S2140513  | 1.23 | 1 968-994(1.23)                                                                                         |
| gnl UG Hs#S1727877  | 8.21 | 3 375-401(0.47) 416-441(0.04) 548-573(8.21)                                                             |
| gnl UG Hs#S6091955  | 1.57 | 4 100-125(0.98) 201-226(1.57) 598-624(1.23) 1225-1253(1.08)                                             |
| gnl UG Hs#S1728415  | 0.04 | 1 171-194(0.04)                                                                                         |
| gnl UG Hs#S4821666  | 0.88 | 2 204-229(0.88) 234-259(0.30)                                                                           |

|                     |      |                                                                                                                                          |
|---------------------|------|------------------------------------------------------------------------------------------------------------------------------------------|
| gnl UG Hs#S4554641  | 2.4  | 2 696-722(2.40) 727-753(2.23)                                                                                                            |
| gnl UG Hs#S1732366  | 2.56 | 2 54-81(0.27) 266-292(2.56)                                                                                                              |
| gnl UG Hs#S2138984  | 2.42 | 1 1554-1580(2.42)                                                                                                                        |
| gnl UG Hs#S4621018  | 2.26 | 2 241-266(2.26) 292-320(1.27)                                                                                                            |
| gnl UG Hs#S3322148  | 3.53 | 2 179-205(1.27) 217-242(3.53)                                                                                                            |
| gnl UG Hs#S2140286  | 1.26 | 1 160-185(1.26)                                                                                                                          |
| gnl UG Hs#S14802329 | 1.04 | 1 940-965(1.04)                                                                                                                          |
| gnl UG Hs#S3355526  | 0.85 | 1 109-134(0.85)                                                                                                                          |
| gnl UG Hs#S3219039  | 1.3  | 1 341-366(1.30)                                                                                                                          |
| gnl UG Hs#S1727432  | 3.6  | 2 176-202(1.56) 368-393(3.60)                                                                                                            |
| gnl UG Hs#S4283807  | 4.79 | 4 830-856(3.06) 1335-1361(1.40) 1650-1675(3.53) 3807-3837(4.79)                                                                          |
| gnl UG Hs#S4828090  | 1.65 | 2 1102-1127(1.65) 1491-1516(0.69)                                                                                                        |
| gnl UG Hs#S4812773  | 2.62 | 8 315-340(0.80) 419-446(0.85) 634-659(2.56) 1691-1716(0.07) 1808-1836(2.62) 1989-2015(0.23) 2629-2655(0.30) 2958-2983(0.21)              |
| gnl UG Hs#S2140715  | 1.08 | 1 519-542(1.08)                                                                                                                          |
| gnl UG Hs#S4820065  | 0.07 | 1 652-679(0.07)                                                                                                                          |
| gnl UG Hs#S2139880  | 2.23 | 5 16-41(0.98) 94-121(0.28) 411-437(1.47) 1074-1100(0.53) 1119-1144(2.23)                                                                 |
| gnl UG Hs#S3220021  | 0.53 | 1 1383-1409(0.53)                                                                                                                        |
| gnl UG Hs#S2139294  | 0.72 | 2 438-463(0.50) 1353-1378(0.72)                                                                                                          |
| gnl UG Hs#S1726435  | 1.08 | 2 76-102(1.08) 151-177(0.81)                                                                                                             |
| gnl UG Hs#S4831163  | 2.33 | 3 119-144(2.01) 360-387(0.16) 1474-1498(2.33)                                                                                            |
| gnl UG Hs#S1971626  | 4.37 | 5 543-568(2.55) 1000-1025(1.07) 1864-1889(4.37) 2425-2450(0.57) 2467-2492(1.82)                                                          |
| gnl UG Hs#S5930917  | 1.3  | 3 380-405(1.30) 750-775(0.91) 807-833(1.11)                                                                                              |
| gnl UG Hs#S3439053  | 0.82 | 1 289-319(0.82)                                                                                                                          |
| gnl UG Hs#S1731130  | 3.17 | 1 107-132(3.17)                                                                                                                          |
| gnl UG Hs#S10831498 | 1.06 | 2 138-163(0.17) 619-646(1.06)                                                                                                            |
| gnl UG Hs#S1727396  | 2.01 | 8 214-240(0.27) 624-650(0.98) 590-616(0.15) 767-795(1.23) 884-912(0.15) 1020-1045(0.26) 1149-1174(0.30) 1238-1267(2.01)                  |
| gnl UG Hs#S1729654  | 1.04 | 2 354-380(0.44) 2826-2850(1.04)                                                                                                          |
| gnl UG Hs#S5978653  | 2.13 | 2 395-420(2.13) 746-771(0.08)                                                                                                            |
| gnl UG Hs#S3972988  | 3.52 | 8 30-58(0.49) 357-385(1.81) 696-721(1.57) 871-899(3.07) 913-941(3.52) 1249-1274(1.65) 1650-1675(2.82) 1809-1834(0.43)                    |
| gnl UG Hs#S3218902  | 3.82 | 7 148-173(3.82) 437-463(0.07) 747-776(1.83) 862-887(1.53) 888-914(0.84) 1081-1106(0.50) 1215-1241(1.30)                                  |
| gnl UG Hs#S3219295  | 4.58 | 1 1530-1556(4.58)                                                                                                                        |
| gnl UG Hs#S4435312  | 1.94 | 1 1240-1266(1.94)                                                                                                                        |
| gnl UG Hs#S2139980  | 0.5  | 2 142-169(0.50) 327-355(0.49)                                                                                                            |
| gnl UG Hs#S4812830  | 0.74 | 2 760-785(0.74) 833-859(0.40)                                                                                                            |
| gnl UG Hs#S4827228  | 1.98 | 1 700-725(1.98)                                                                                                                          |
| gnl UG Hs#S1729462  | 0.2  | 1 311-336(0.20)                                                                                                                          |
| gnl UG Hs#S5931237  | 2.54 | 1 89-115(2.54)                                                                                                                           |
| gnl UG Hs#S1727610  | 0.07 | 1 553-578(0.07)                                                                                                                          |
| gnl UG Hs#S5978414  | 4.72 | 2 347-373(1.86) 1536-1561(4.72)                                                                                                          |
| gnl UG Hs#S2139519  | 3.24 | 2 106-132(1.03) 777-802(3.24)                                                                                                            |
| gnl UG Hs#S4807871  | 3.36 | 2 51-77(1.36) 480-506(3.36)                                                                                                              |
| gnl UG Hs#S3438444  | 2.57 | 1 20-45(2.57)                                                                                                                            |
| gnl UG Hs#S5860296  | 0.65 | 1 1277-1303(0.65)                                                                                                                        |
| gnl UG Hs#S1726305  | 2.4  | 1 7-33(2.40)                                                                                                                             |
| gnl UG Hs#S4614090  | 3.5  | 3 180-206(3.50) 1299-1325(0.65) 1489-1517(0.26)                                                                                          |
| gnl UG Hs#S2294623  | 5.3  | 5 597-622(1.82) 1171-1196(0.04) 1521-1547(1.82) 1732-1757(2.69) 1797-1822(5.30)                                                          |
| gnl UG Hs#S1729525  | 1.63 | 2 738-764(1.27) 911-936(1.63)                                                                                                            |
| gnl UG Hs#S15115711 | 1.99 | 1 56-84(1.99)                                                                                                                            |
| gnl UG Hs#S3602280  | 1.36 | 2 364-389(1.36) 476-501(1.11)                                                                                                            |
| gnl UG Hs#S3439166  | 5.42 | 5 77-102(1.13) 970-995(5.42) 1000-1025(0.53) 1053-1081(0.75) 1097-1125(1.21)                                                             |
| gnl UG Hs#S4820088  | 2.8  | 9 78-104(0.68) 340-366(0.75) 467-493(1.60) 957-982(2.04) 1052-1077(0.72) 1165-1190(0.72) 1242-1267(2.80) 1489-1516(1.52) 1696-1720(1.69) |
| gnl UG Hs#S1732040  | 0.18 | 1 87-115(0.18)                                                                                                                           |
| gnl UG Hs#S3438968  | 2.04 | 5 510-535(0.40) 555-581(2.04) 903-928(1.98) 1008-1033(0.65) 1624-1649(1.50)                                                              |
| gnl UG Hs#S5978529  | 2.57 | 6 275-303(0.78) 991-1019(1.29) 1615-1639(2.57) 1664-1689(0.50) 2014-2046(1.07) 2204-2229(2.08)                                           |

|                     |      |                                                                                                 |
|---------------------|------|-------------------------------------------------------------------------------------------------|
| gnl UG Hs#S1727013  | 2.04 | 2 1502-1527(2.04) 2079-2104(0.75)                                                               |
| gnl UG Hs#S1824464  | 2.62 | 2 154-179(1.77) 249-275(2.62)                                                                   |
| gnl UG Hs#S5860346  | 0.36 | 1 204-230(0.36)                                                                                 |
| gnl UG Hs#S1728460  | 1.33 | 1 511-536(1.33)                                                                                 |
| gnl UG Hs#S7111007  | 1.5  | 1 897-922(1.50)                                                                                 |
| gnl UG Hs#S2139275  | 0.04 | 1 546-574(0.04)                                                                                 |
| gnl UG Hs#S4807940  | 4    | 1 59-85(4.00)                                                                                   |
| gnl UG Hs#S15638171 | 0.89 | 1 546-571(0.89)                                                                                 |
| gnl UG Hs#S3973070  | 1.91 | 3 95-121(1.30) 268-295(0.06) 563-589(1.91)                                                      |
| gnl UG Hs#S3355525  | 0.98 | 1 501-526(0.98)                                                                                 |
| gnl UG Hs#S4823456  | 1.27 | 1 1215-1242(1.27)                                                                               |
| gnl UG Hs#S4807654  | 1.07 | 2 268-293(1.07) 353-378(0.68)                                                                   |
| gnl UG Hs#S3438770  | 1.08 | 1 1697-1723(1.08)                                                                               |
| gnl UG Hs#S1726735  | 0.08 | 1 62-85(0.08)                                                                                   |
| gnl UG Hs#S1824534  | 2.81 | 4 227-253(0.33) 590-614(0.45) 789-814(2.33) 833-861(2.81)                                       |
| gnl UG Hs#S3603839  | 1.66 | 1 164-190(1.66)                                                                                 |
| gnl UG Hs#S2294576  | 0.08 | 1 100-125(0.08)                                                                                 |
| gnl UG Hs#S2293791  | 3.67 | 1 826-852(3.67)                                                                                 |
| gnl UG Hs#S1729942  | 4.48 | 2 25-53(2.25) 612-636(4.48)                                                                     |
| gnl UG Hs#S1731896  | 0.07 | 1 2904-2931(0.07)                                                                               |
| gnl UG Hs#S5979261  | 1.21 | 1 232-257(1.21)                                                                                 |
| gnl UG Hs#S3219983  | 0.96 | 3 463-488(0.58) 1066-1091(0.96) 1136-1161(0.40)                                                 |
| gnl UG Hs#S4044638  | 0.21 | 1 1008-1034(0.21)                                                                               |
| gnl UG Hs#S1728943  | 0.68 | 2 217-245(0.66) 627-652(0.68)                                                                   |
| gnl UG Hs#S3619208  | 0.33 | 1 456-481(0.33)                                                                                 |
| gnl UG Hs#S7113284  | 4.21 | 6 424-449(0.65) 554-579(1.85) 1048-1076(0.81) 1385-1410(4.21) 1525-1550(0.63) 1574-1599(0.72)   |
| gnl UG Hs#S1728864  | 2.25 | 6 553-579(2.01) 1134-1160(2.25) 1206-1231(0.58) 1951-1977(1.27) 2201-2226(1.52) 2421-2450(1.27) |
| gnl UG Hs#S2293763  | 0.79 | 1 320-345(0.79)                                                                                 |
| gnl UG Hs#S2140628  | 2.89 | 1 378-406(2.89)                                                                                 |
| gnl UG Hs#S5931247  | 4.75 | 5 130-156(4.75) 453-478(1.80) 579-605(0.02) 1095-1121(0.98) 1140-1165(1.75)                     |
| gnl UG Hs#S1727861  | 1.65 | 1 278-304(1.65)                                                                                 |
| gnl UG Hs#S1729001  | 3.26 | 4 69-94(1.72) 366-391(3.26) 526-552(1.60) 939-962(1.72)                                         |
| gnl UG Hs#S3603144  | 2.65 | 4 278-304(0.72) 316-341(1.17) 352-377(1.53) 421-449(2.65)                                       |
| gnl UG Hs#S2294347  | 1.57 | 1 940-965(1.57)                                                                                 |
| gnl UG Hs#S2139626  | 2.98 | 4 1129-1152(2.98) 2222-2250(0.49) 2375-2400(0.81) 2683-2708(1.00)                               |
| gnl UG Hs#S6163292  | 0.91 | 2 120-145(0.57) 321-347(0.91)                                                                   |
| gnl UG Hs#S1731437  | 3.17 | 3 744-769(0.65) 966-991(3.17) 1003-1030(0.36)                                                   |
| gnl UG Hs#S2139889  | 1.14 | 1 49-77(1.14)                                                                                   |
| gnl UG Hs#S5978804  | 0.65 | 2 1082-1109(0.03) 1692-1718(0.65)                                                               |
| gnl UG Hs#S2140197  | 3.14 | 1 211-237(3.14)                                                                                 |
| gnl UG Hs#S4822856  | 5.15 | 2 963-988(5.15) 2866-2890(0.40)                                                                 |
| gnl UG Hs#S1728785  | 0.84 | 4 753-778(0.50) 996-1021(0.14) 3034-3061(0.84) 6769-6794(0.17)                                  |
| gnl UG Hs#S3619564  | 0.46 | 1 142-167(0.46)                                                                                 |
| gnl UG Hs#S3219396  | 0.72 | 4 92-117(0.50) 333-358(0.30) 1837-1863(0.72) 1992-2017(0.47)                                    |
| gnl UG Hs#S2139092  | 4.14 | 3 249-274(1.72) 485-511(4.14) 1377-1402(0.53)                                                   |
| gnl UG Hs#S1726492  | 3.26 | 1 811-836(3.26)                                                                                 |
| gnl UG Hs#S3219390  | 2.2  | 6 285-313(0.55) 666-691(2.05) 1196-1221(2.20) 1593-1616(0.04) 2004-2029(1.57) 2386-2412(0.02)   |
| gnl UG Hs#S1731597  | 2.62 | 5 145-170(0.08) 336-364(2.62) 536-562(1.01) 713-740(0.71) 875-900(0.20)                         |
| gnl UG Hs#S5930920  | 2.43 | 1 325-350(2.43)                                                                                 |
| gnl UG Hs#S1969120  | 3.13 | 6 287-312(2.62) 1887-1912(3.13) 2714-2739(1.40) 2753-2779(2.30) 2858-2886(0.79) 2944-2969(0.62) |
| gnl UG Hs#S1729445  | 4.62 | 2 532-557(4.62) 692-720(0.78)                                                                   |
| gnl UG Hs#S4631058  | 0.65 | 2 451-477(0.08) 1870-1897(0.65)                                                                 |
| gnl UG Hs#S2293473  | 0.08 | 1 849-877(0.08)                                                                                 |
| gnl UG Hs#S2139501  | 2.04 | 5 9-35(1.48) 790-818(0.93) 1777-1803(0.04) 2002-2027(1.30) 2047-2073(2.04)                      |

|                     |      |   |                                                                                                                          |
|---------------------|------|---|--------------------------------------------------------------------------------------------------------------------------|
| gnl UG Hs#S1728991  | 0.72 | 3 | 446-471(0.30) 708-734(0.72) 747-772(0.26)                                                                                |
| gnl UG Hs#S1730047  | 3.04 | 1 | 82-107(3.04)                                                                                                             |
| gnl UG Hs#S4807804  | 1.11 | 1 | 266-291(1.11)                                                                                                            |
| gnl UG Hs#S4046414  | 1.72 | 2 | 1839-1864(0.33) 2144-2170(1.72)                                                                                          |
| gnl UG Hs#S10832341 | 0.72 | 1 | 671-696(0.72)                                                                                                            |
| gnl UG Hs#S4618618  | 0.56 | 1 | 457-482(0.56)                                                                                                            |
| gnl UG Hs#S3993853  | 0.84 | 1 | 125-149(0.84)                                                                                                            |
| gnl UG Hs#S5495040  | 3.01 | 1 | 82-107(3.01)                                                                                                             |
| gnl UG Hs#S1727999  | 2.04 | 6 | 75-101(2.04) 251-276(1.13) 310-336(0.14) 906-931(0.23) 1532-1557(1.40) 1710-1736(0.50)                                   |
| gnl UG Hs#S5860362  | 3.67 | 1 | 517-543(3.67)                                                                                                            |
| gnl UG Hs#S1728646  | 0.39 | 1 | 541-566(0.39)                                                                                                            |
| gnl UG Hs#S2293223  | 0.4  | 1 | 696-721(0.40)                                                                                                            |
| gnl UG Hs#S3689     | 1.28 | 2 | 275-301(0.84) 471-497(1.28)                                                                                              |
| gnl UG Hs#S1731046  | 1.55 | 5 | 337-362(0.13) 885-911(0.77) 943-973(1.15) 1579-1605(0.50) 1619-1643(1.55)                                                |
| gnl UG Hs#S4811318  | 3.57 | 1 | 2579-2604(3.57)                                                                                                          |
| gnl UG Hs#S2294105  | 4.11 | 3 | 183-208(2.57) 237-263(1.25) 271-296(4.11)                                                                                |
| gnl UG Hs#S3438680  | 4.26 | 4 | 515-541(0.08) 689-714(4.20) 922-947(4.26) 1003-1027(0.99)                                                                |
| gnl UG Hs#S4435611  | 0.41 | 1 | 140-168(0.41)                                                                                                            |
| gnl UG Hs#S4044956  | 1.63 | 8 | 704-732(0.08) 872-900(0.13) 912-937(1.63) 978-1003(1.40) 1102-1128(0.37) 1538-1563(0.30) 1570-1598(0.20) 2148-2176(0.34) |
| gnl UG Hs#S2139190  | 4    | 4 | 29-56(1.42) 206-230(4.00) 243-268(0.04) 284-309(3.50)                                                                    |
| gnl UG Hs#S2139882  | 1.37 | 2 | 100-125(0.73) 492-518(1.37)                                                                                              |
| gnl UG Hs#S7111239  | 2.89 | 2 | 330-356(1.50) 772-797(2.89)                                                                                              |
| gnl UG Hs#S2294469  | 0.33 | 1 | 490-518(0.33)                                                                                                            |
| gnl UG Hs#S2139441  | 0.26 | 2 | 122-147(0.01) 303-328(0.26)                                                                                              |
| gnl UG Hs#S1727858  | 0.72 | 1 | 307-332(0.72)                                                                                                            |
| gnl UG Hs#S4828791  | 1.4  | 1 | 207-232(1.40)                                                                                                            |
| gnl UG Hs#S2140201  | 1.53 | 2 | 985-1010(0.84) 1029-1055(1.53)                                                                                           |
| gnl UG Hs#S1728678  | 1.65 | 1 | 234-259(1.65)                                                                                                            |
| gnl UG Hs#S1730096  | 0.84 | 3 | 932-955(0.24) 1530-1555(0.84) 1568-1596(0.59)                                                                            |
| gnl UG Hs#S2293499  | 3.11 | 5 | 225-252(0.61) 422-450(0.23) 1088-1113(3.11) 1207-1233(0.98) 1282-1307(1.75)                                              |
| gnl UG Hs#S71110657 | 0.18 | 1 | 982-1007(0.18)                                                                                                           |
| gnl UG Hs#S10832349 | 0.71 | 1 | 42-70(0.71)                                                                                                              |
| gnl UG Hs#S2139055  | 2.57 | 4 | 535-560(0.43) 943-968(0.07) 1007-1032(2.17) 1603-1628(2.57)                                                              |
| gnl UG Hs#S3219652  | 0.89 | 1 | 624-649(0.89)                                                                                                            |
| gnl UG Hs#S1727128  | 1.72 | 4 | 497-522(1.72) 899-927(1.04) 1372-1399(0.84) 1660-1683(1.31)                                                              |
| gnl UG Hs#S5930965  | 1.72 | 2 | 170-195(1.72) 1244-1269(1.35)                                                                                            |
| gnl UG Hs#S5978395  | 2.57 | 1 | 314-342(2.57)                                                                                                            |
| gnl UG Hs#S1732274  | 1.14 | 1 | 803-828(1.14)                                                                                                            |
| gnl UG Hs#S4813253  | 3.75 | 5 | 132-158(0.23) 446-474(1.44) 591-616(3.75) 1120-1145(0.75) 1212-1239(0.10)                                                |
| gnl UG Hs#S2140594  | 0.48 | 1 | 58-83(0.48)                                                                                                              |
| gnl UG Hs#S3219599  | 1.14 | 3 | 1282-1308(0.60) 2141-2166(0.98) 3624-3649(1.14)                                                                          |
| gnl UG Hs#S2139314  | 2.72 | 6 | 414-437(1.08) 908-936(2.23) 999-1024(1.52) 1065-1090(1.11) 1385-1413(0.98) 1575-1601(2.72)                               |
| gnl UG Hs#S2138760  | 1.52 | 4 | 158-183(0.87) 490-517(1.52) 536-563(0.13) 658-686(1.38)                                                                  |
| gnl UG Hs#S1732175  | 1.68 | 1 | 1372-1397(1.68)                                                                                                          |
| gnl UG Hs#S1729090  | 3.46 | 4 | 1347-1372(2.07) 1932-1960(2.71) 3521-3546(3.46) 4083-4108(1.68)                                                          |
| gnl UG Hs#S1728928  | 1.08 | 3 | 1326-1351(0.48) 1857-1885(1.02) 2634-2659(1.08)                                                                          |
| gnl UG Hs#S1730816  | 2.46 | 1 | 106-131(2.46)                                                                                                            |
| gnl UG Hs#S2294533  | 1.44 | 4 | 316-342(1.44) 414-440(0.53) 1402-1428(0.40) 1804-1829(0.94)                                                              |
| gnl UG Hs#S15640250 | 0.43 | 1 | 618-643(0.43)                                                                                                            |
| gnl UG Hs#S3542621  | 0.04 | 1 | 169-194(0.04)                                                                                                            |
| gnl UG Hs#S1728671  | 2.07 | 2 | 300-325(1.40) 422-447(2.07)                                                                                              |
| gnl UG Hs#S2139782  | 1.98 | 2 | 717-742(1.98) 833-861(1.81)                                                                                              |
| gnl UG Hs#S3438727  | 0.49 | 1 | 557-582(0.49)                                                                                                            |
| gnl UG Hs#S3438515  | 1.57 | 5 | 1064-1090(1.57) 1120-1145(1.15) 1177-1207(0.30) 1240-1264(1.56) 1612-1637(0.17)                                          |

|                     |      |                                                                                                                                                                                                |
|---------------------|------|------------------------------------------------------------------------------------------------------------------------------------------------------------------------------------------------|
| gnl UG Hs#S3220033  | 4.08 | 6 35-61(4.08) 305-331(0.40) 359-388(0.94) 627-653(3.04) 1032-1057(0.57) 1566-1591(2.82)                                                                                                        |
| gnl UG Hs#S2139603  | 1.11 | 4 446-474(0.04) 524-549(0.24) 565-591(1.11) 810-835(0.17)                                                                                                                                      |
| gnl UG Hs#S1730553  | 1.17 | 1 72-97(1.17)                                                                                                                                                                                  |
| gnl UG Hs#S2140472  | 1.75 | 1 337-362(1.75)                                                                                                                                                                                |
| gnl UG Hs#S15631457 | 1.3  | 3 693-718(1.30) 739-766(0.36) 1451-1476(0.14)                                                                                                                                                  |
| gnl UG Hs#S1728883  | 0.97 | 1 149-174(0.97)                                                                                                                                                                                |
| gnl UG Hs#S1728694  | 2.89 | 4 755-778(2.31) 908-935(0.33) 1005-1030(1.17) 1703-1728(2.89)                                                                                                                                  |
| gnl UG Hs#S5930958  | 3.72 | 11 12-37(0.58) 278-303(2.30) 439-464(1.00) 468-495(0.02) 517-542(0.33) 544-569(1.56) 1155-1180(0.75) 1201-1227(0.27) 1283-1308(1.72) 1912-1937(3.72) 2010-2035(3.08)                           |
| gnl UG Hs#S4808302  | 2.89 | 1 1278-1303(2.89)                                                                                                                                                                              |
| gnl UG Hs#S15631741 | 3.18 | 4 56-81(1.24) 268-296(1.49) 840-865(0.48) 1131-1159(3.18)                                                                                                                                      |
| gnl UG Hs#S1727555  | 1.34 | 3 1322-1347(1.20) 1747-1775(1.23) 2314-2337(1.34)                                                                                                                                              |
| gnl UG Hs#S1731447  | 1.72 | 2 1302-1328(1.72) 1346-1371(1.72)                                                                                                                                                              |
| gnl UG Hs#S1726355  | 0.67 | 1 109-135(0.67)                                                                                                                                                                                |
| gnl UG Hs#S4811334  | 2.13 | 1 1067-1092(2.13)                                                                                                                                                                              |
| gnl UG Hs#S5931075  | 2.58 | 2 278-303(2.58) 243-269(1.15)                                                                                                                                                                  |
| gnl UG Hs#S4816391  | 1.72 | 6 200-228(1.40) 554-580(0.50) 593-618(0.89) 944-969(0.72) 2124-2150(1.72) 2490-2515(1.05)                                                                                                      |
| gnl UG Hs#S4545910  | 4.11 | 2 187-213(1.40) 1158-1183(4.11)                                                                                                                                                                |
| gnl UG Hs#S3619111  | 3.46 | 3 576-602(1.36) 673-698(0.30) 701-726(3.46)                                                                                                                                                    |
| gnl UG Hs#S2140543  | 0.11 | 1 159-184(0.11)                                                                                                                                                                                |
| gnl UG Hs#S1728603  | 1.41 | 1 231-256(1.41)                                                                                                                                                                                |
| gnl UG Hs#S3219337  | 4.7  | 4 1187-1212(0.58) 2352-2379(4.70) 2447-2472(2.30) 2490-2516(0.17)                                                                                                                              |
| gnl UG Hs#S2293642  | 1.17 | 2 1592-1618(0.23) 2002-2030(1.17)                                                                                                                                                              |
| gnl UG Hs#S6163429  | 2.84 | 13 229-254(0.26) 927-952(0.40) 1637-1662(1.10) 2320-2346(1.62) 2595-2620(2.53) 3191-3216(2.63) 4166-4193(0.97) 4565-4590(0.97) 5139-5164(1.67) 5283-5308(0.46) 5416-5441(0.20) 5515-5540(2.84) |
| gnl UG Hs#S1729797  | 3.28 | 1 60-86(3.28)                                                                                                                                                                                  |
| gnl UG Hs#S1732145  | 0.43 | 1 1916-1941(0.43)                                                                                                                                                                              |
| gnl UG Hs#S2293819  | 1.89 | 3 918-943(1.58) 1048-1074(1.89) 1273-1298(0.43)                                                                                                                                                |
| gnl UG Hs#S3973043  | 1.27 | 3 160-185(1.14) 299-325(1.27) 2131-2157(0.69)                                                                                                                                                  |
| gnl UG Hs#S4614324  | 2.91 | 2 486-511(2.91) 1673-1698(0.72)                                                                                                                                                                |
| gnl UG Hs#S3603199  | 1.76 | 4 1181-1206(1.72) 1377-1404(0.07) 1640-1666(1.76) 1767-1795(0.30)                                                                                                                              |
| gnl UG Hs#S3803678  | 1.53 | 10 65-91(0.07) 157-182(0.50) 963-988(0.53) 1962-1988(0.71) 2860-2885(0.82) 2930-2956(0.69) 3188-3213(1.53) 3854-3882(0.35) 3943-3969(1.50) 4240-4265(0.94)                                     |
| gnl UG Hs#S10832008 | 2.4  | 1 68-96(2.40)                                                                                                                                                                                  |
| gnl UG Hs#S1729116  | 0.13 | 1 579-604(0.13)                                                                                                                                                                                |
| gnl UG Hs#S4435607  | 0.66 | 1 403-428(0.66)                                                                                                                                                                                |
| gnl UG Hs#S2138805  | 0.62 | 2 67-92(0.23) 127-153(0.62)                                                                                                                                                                    |
| gnl UG Hs#S1729616  | 3.26 | 4 14-39(3.26) 761-789(2.23) 850-876(0.40) 1130-1158(0.30)                                                                                                                                      |
| gnl UG Hs#S3322123  | 4.36 | 5 148-174(4.36) 242-268(0.23) 450-476(1.23) 702-728(0.84) 954-980(0.14)                                                                                                                        |
| gnl UG Hs#S3601865  | 2.68 | 6 285-312(0.94) 355-383(1.03) 479-506(0.23) 548-574(2.68) 678-703(0.05) 827-850(0.79)                                                                                                          |
| gnl UG Hs#S3219386  | 0.16 | 1 109-134(0.16)                                                                                                                                                                                |
| gnl UG Hs#S15642344 | 0.24 | 1 1164-1190(0.24)                                                                                                                                                                              |
| gnl UG Hs#S5979255  | 1.5  | 1 700-728(1.50)                                                                                                                                                                                |
| gnl UG Hs#S15638249 | 0.52 | 1 580-605(0.52)                                                                                                                                                                                |
| gnl UG Hs#S1731110  | 2.36 | 3 42-67(0.62) 948-973(0.04) 1191-1216(2.36)                                                                                                                                                    |
| gnl UG Hs#S15640915 | 0.72 | 3 139-164(0.72) 200-223(0.21) 781-806(0.50)                                                                                                                                                    |
| gnl UG Hs#S4631275  | 2.81 | 5 67-95(2.81) 437-463(2.56) 793-819(0.50) 1024-1049(0.75) 1413-1439(1.03)                                                                                                                      |
| gnl UG Hs#S5931253  | 1.71 | 1 736-762(1.71)                                                                                                                                                                                |
| gnl UG Hs#S14272936 | 2.82 | 6 19-44(0.04) 70-95(0.76) 475-503(1.42) 648-673(2.82) 713-739(1.76) 805-830(1.04)                                                                                                              |
| gnl UG Hs#S2293361  | 3.08 | 3 3-27(0.29) 462-489(0.43) 911-937(3.08)                                                                                                                                                       |
| gnl UG Hs#S2140621  | 4.5  | 4 1380-1405(4.50) 1440-1466(0.04) 2946-2974(1.48) 3736-3762(2.43)                                                                                                                              |
| gnl UG Hs#S3438928  | 0.16 | 1 53-78(0.16)                                                                                                                                                                                  |
| gnl UG Hs#S2139947  | 2.76 | 1 248-274(2.76)                                                                                                                                                                                |
| gnl UG Hs#S2139103  | 0.91 | 1 12-38(0.91)                                                                                                                                                                                  |
| gnl UG Hs#S1726551  | 1.5  | 2 92-118(1.50) 125-150(0.72)                                                                                                                                                                   |
| gnl UG Hs#S4623360  | 3.29 | 11 222-250(0.23) 282-305(0.42) 464-489(3.07) 617-642(0.84) 825-849(0.32) 1058-1083(3.29) 1519-1547(0.49) 1752-1780(1.97) 2096-2123(1.56) 2180-2206(1.34) 2649-2675(0.50)                       |
| gnl UG Hs#S1726815  | 0.92 | 3 164-191(0.78) 292-318(0.92) 534-561(0.59)                                                                                                                                                    |



|                     |      |                                                                                                                               |
|---------------------|------|-------------------------------------------------------------------------------------------------------------------------------|
| gnl UG Hs#S4553703  | 1.59 | 1 1216-1242(1.59)                                                                                                             |
| gnl UG Hs#S2139987  | 6.11 | 5 650-675(5.21) 909-936(1.88) 948-973(0.91) 1091-1117(1.04) 1122-1147(6.11)                                                   |
| gnl UG Hs#S1726768  | 4.49 | 8 161-184(2.20) 237-262(2.01) 722-749(0.62) 934-959(0.39) 973-999(2.08) 1166-1191(4.14) 1229-1254(4.49) 2185-2210(1.30)       |
| gnl UG Hs#S11046704 | 1.55 | 3 95-123(1.55) 735-760(0.91) 844-869(0.49)                                                                                    |
| gnl UG Hs#S4807559  | 1.78 | 2 216-241(0.84) 868-895(1.78)                                                                                                 |
| gnl UG Hs#S1728774  | 0.46 | 1 423-448(0.46)                                                                                                               |
| gnl UG Hs#S1730935  | 4.3  | 1 1573-1598(4.30)                                                                                                             |
| gnl UG Hs#S3601540  | 1.76 | 1 81-106(1.76)                                                                                                                |
| gnl UG Hs#S3438826  | 0.61 | 1 93-117(0.61)                                                                                                                |
| gnl UG Hs#S3438957  | 0.08 | 1 377-403(0.08)                                                                                                               |
| gnl UG Hs#S2293437  | 1.01 | 1 205-230(1.01)                                                                                                               |
| gnl UG Hs#S1730721  | 1.97 | 1 589-614(1.97)                                                                                                               |
| gnl UG Hs#S1728769  | 1.23 | 2 280-305(0.82) 312-340(1.23)                                                                                                 |
| gnl UG Hs#S1824444  | 0.53 | 2 569-594(0.53) 1150-1175(0.07)                                                                                               |
| gnl UG Hs#S1729293  | 0.29 | 1 185-212(0.29)                                                                                                               |
| gnl UG Hs#S1727715  | 1.4  | 1 78-103(1.40)                                                                                                                |
| gnl UG Hs#S5978491  | 1.33 | 8 9-34(0.30) 215-240(0.94) 364-389(1.24) 661-684(0.54) 814-840(0.69) 1582-1610(1.33) 2167-2192(0.62) 2395-2422(0.24)          |
| gnl UG Hs#S472694   | 2.23 | 8 165-190(2.23) 355-383(2.13) 1160-1188(0.30) 1276-1301(0.30) 1638-1663(1.37) 1705-1731(2.23) 2081-2107(1.40) 2731-2756(1.75) |
| gnl UG Hs#S2139219  | 0.55 | 3 905-929(0.55) 1083-1105(0.01) 1237-1265(0.42)                                                                               |
| gnl UG Hs#S5978563  | 3.56 | 3 548-573(3.56) 1476-1501(0.17) 1664-1690(0.88)                                                                               |
| gnl UG Hs#S1731001  | 1.66 | 3 514-544(1.66) 1126-1152(1.08) 1371-1396(0.13)                                                                               |
| gnl UG Hs#S2293247  | 0.56 | 1 394-419(0.56)                                                                                                               |
| gnl UG Hs#S1732039  | 2.04 | 2 577-602(2.04) 652-680(1.97)                                                                                                 |
| gnl UG Hs#S4809699  | 2.24 | 2 1829-1854(2.24) 2330-2356(0.33)                                                                                             |
| gnl UG Hs#S2139331  | 2.08 | 1 309-335(2.08)                                                                                                               |
| gnl UG Hs#S4815643  | 1.3  | 1 164-192(1.30)                                                                                                               |
| gnl UG Hs#S3601480  | 0.34 | 2 124-152(0.34) 181-206(0.33)                                                                                                 |
| gnl UG Hs#S4808638  | 2.07 | 1 225-253(2.07)                                                                                                               |
| gnl UG Hs#S5860315  | 6.4  | 2 422-448(6.40) 927-952(0.48)                                                                                                 |
| gnl UG Hs#S5978559  | 0.97 | 2 683-708(0.57) 941-968(0.97)                                                                                                 |
| gnl UG Hs#S7110219  | 1.98 | 1 1668-1693(1.98)                                                                                                             |
| gnl UG Hs#S3219512  | 2.46 | 2 771-796(0.72) 1840-1867(2.46)                                                                                               |
| gnl UG Hs#S7112326  | 4.62 | 5 143-169(2.90) 988-1011(4.11) 1054-1081(0.69) 1271-1296(4.62) 1558-1585(0.32)                                                |
| gnl UG Hs#S4616166  | 1.54 | 1 211-239(1.54)                                                                                                               |
| gnl UG Hs#S3219404  | 1.52 | 2 163-191(1.52) 398-426(0.39)                                                                                                 |
| gnl UG Hs#S1730340  | 2.11 | 3 990-1015(1.40) 1395-1421(0.34) 1945-1970(2.11)                                                                              |
| gnl UG Hs#S3219416  | 2.94 | 4 237-265(1.40) 522-550(2.94) 1070-1096(1.39) 1164-1189(0.37)                                                                 |
| gnl UG Hs#S1729537  | 1.26 | 1 638-663(1.26)                                                                                                               |
| gnl UG Hs#S11154015 | 2.94 | 4 1039-1064(1.07) 1433-1458(1.40) 2239-2264(2.94) 2478-2506(0.40)                                                             |
| gnl UG Hs#S2294287  | 0.01 | 1 551-576(0.01)                                                                                                               |
| gnl UG Hs#S1726542  | 0.72 | 1 205-230(0.72)                                                                                                               |
| gnl UG Hs#S1729591  | 1.4  | 5 481-506(1.40) 511-537(0.76) 1854-1879(0.03) 2073-2099(0.07) 2150-2175(0.30)                                                 |
| gnl UG Hs#S1731708  | 0.3  | 1 209-236(0.30)                                                                                                               |
| gnl UG Hs#S1731142  | 0.58 | 1 39-64(0.58)                                                                                                                 |
| gnl UG Hs#S4545900  | 1.3  | 1 48-74(1.30)                                                                                                                 |
| gnl UG Hs#S2139702  | 0.92 | 3 156-181(0.92) 195-220(0.36) 619-644(0.81)                                                                                   |
| gnl UG Hs#S4820264  | 0.98 | 4 307-332(0.56) 863-888(0.30) 1365-1390(0.98) 1617-1642(0.20)                                                                 |
| gnl UG Hs#S3219499  | 0.62 | 2 51-77(0.01) 95-120(0.62)                                                                                                    |
| gnl UG Hs#S2138735  | 1.58 | 1 394-419(1.58)                                                                                                               |
| gnl UG Hs#S5978951  | 2.79 | 8 45-70(0.89) 433-460(0.78) 885-910(2.79) 960-985(2.72) 1277-1302(1.00) 1491-1517(1.17) 1519-1542(0.42) 2269-2298(2.37)       |
| gnl UG Hs#S3603738  | 0.14 | 1 400-425(0.14)                                                                                                               |
| gnl UG Hs#S3601567  | 4.5  | 4 106-130(2.99) 1084-1109(2.11) 2037-2063(0.36) 2100-2125(4.50)                                                               |
| gnl UG Hs#S1728788  | 0.66 | 1 3-30(0.66)                                                                                                                  |
| gnl UG Hs#S1731566  | 1.71 | 2 406-432(1.71) 966-992(0.44)                                                                                                 |

|                     |      |    |                                                                                                                                                       |
|---------------------|------|----|-------------------------------------------------------------------------------------------------------------------------------------------------------|
| gnl UG Hs#S6693339  | 0.94 | 2  | 482-509(0.66) 588-613(0.94)                                                                                                                           |
| gnl UG Hs#S2293715  | 1.85 | 3  | 570-598(0.81) 776-802(0.40) 1296-1324(1.85)                                                                                                           |
| gnl UG Hs#S15636107 | 6.04 | 2  | 56-82(0.27) 404-430(6.04)                                                                                                                             |
| gnl UG Hs#S1730303  | 1.72 | 1  | 139-164(1.72)                                                                                                                                         |
| gnl UG Hs#S5978397  | 1.3  | 1  | 810-838(1.30)                                                                                                                                         |
| gnl UG Hs#S4553743  | 0.43 | 1  | 295-320(0.43)                                                                                                                                         |
| gnl UG Hs#S2293759  | 0.72 | 1  | 1140-1165(0.72)                                                                                                                                       |
| gnl UG Hs#S1729252  | 5.82 | 2  | 152-178(0.14) 352-377(5.82)                                                                                                                           |
| gnl UG Hs#S3972981  | 1.53 | 1  | 1232-1257(1.53)                                                                                                                                       |
| gnl UG Hs#S15633045 | 4.5  | 7  | 290-316(4.50) 767-793(0.21) 1304-1329(0.47) 1348-1376(0.85) 2401-2428(0.46) 2736-2763(0.97) 2890-2915(0.01)                                           |
| gnl UG Hs#S1729645  | 0.17 | 2  | 523-550(0.05) 637-663(0.17)                                                                                                                           |
| gnl UG Hs#S4554431  | 2.27 | 2  | 463-488(2.27) 425-451(0.84)                                                                                                                           |
| gnl UG Hs#S2139316  | 0.3  | 1  | 44-69(0.30)                                                                                                                                           |
| gnl UG Hs#S15631472 | 1.87 | 1  | 337-362(1.87)                                                                                                                                         |
| gnl UG Hs#S1732096  | 3.79 | 10 | 125-151(0.91) 251-276(1.16) 410-436(1.13) 614-640(2.71) 969-994(1.20) 1237-1263(2.30) 1363-1388(0.75) 2073-2098(0.23) 2108-2134(1.18) 2203-2230(3.79) |
| gnl UG Hs#S2293692  | 1.65 | 4  | 36-64(0.40) 482-507(1.65) 857-883(0.62) 943-969(1.43)                                                                                                 |
| gnl UG Hs#S1729047  | 3.49 | 1  | 930-955(3.49)                                                                                                                                         |
| gnl UG Hs#S4046404  | 2.04 | 2  | 55-83(2.04) 415-441(0.36)                                                                                                                             |
| gnl UG Hs#S4841566  | 4.68 | 5  | 136-161(1.30) 232-257(2.46) 344-369(1.30) 443-468(1.03) 514-538(4.68)                                                                                 |
| gnl UG Hs#S4045829  | 0.53 | 1  | 65-90(0.53)                                                                                                                                           |
| gnl UG Hs#S5930975  | 3.52 | 2  | 42-67(3.52) 589-614(0.20)                                                                                                                             |
| gnl UG Hs#S4392127  | 1.37 | 1  | 285-310(1.37)                                                                                                                                         |
| gnl UG Hs#S3219014  | 1.14 | 3  | 44-69(0.58) 701-726(0.81) 1416-1443(1.14)                                                                                                             |
| gnl UG Hs#S1731669  | 2.5  | 2  | 482-507(2.50) 870-895(0.04)                                                                                                                           |
| gnl UG Hs#S2293262  | 3.89 | 1  | 204-229(3.89)                                                                                                                                         |
| gnl UG Hs#S998736   | 1.5  | 4  | 772-797(1.50) 1402-1427(0.61) 2033-2061(0.23) 2192-2218(0.27)                                                                                         |
| gnl UG Hs#S3219090  | 2.43 | 4  | 98-123(1.50) 236-261(0.40) 433-459(2.40) 463-488(2.43)                                                                                                |
| gnl UG Hs#S1731068  | 1.47 | 1  | 116-141(1.47)                                                                                                                                         |
| gnl UG Hs#S1732068  | 3.57 | 4  | 133-158(0.67) 592-620(1.42) 960-985(3.57) 1018-1043(2.73)                                                                                             |
| gnl UG Hs#S7111875  | 0.98 | 3  | 270-297(0.26) 647-672(0.04) 733-759(0.98)                                                                                                             |
| gnl UG Hs#S11046549 | 0.75 | 2  | 743-768(0.66) 1197-1223(0.75)                                                                                                                         |
| gnl UG Hs#S3438590  | 0.26 | 1  | 561-586(0.26)                                                                                                                                         |
| gnl UG Hs#S1730503  | 3.43 | 1  | 39-67(3.43)                                                                                                                                           |
| gnl UG Hs#S4046398  | 0.87 | 2  | 695-723(0.01) 1281-1306(0.87)                                                                                                                         |
| gnl UG Hs#S4435426  | 1.43 | 1  | 1912-1937(1.43)                                                                                                                                       |
| gnl UG Hs#S3219147  | 2.59 | 5  | 76-101(2.04) 133-161(1.17) 198-223(1.00) 426-452(2.59) 773-798(1.30)                                                                                  |
| gnl UG Hs#S1727746  | 2.87 | 5  | 430-455(0.08) 464-489(1.56) 705-731(0.72) 910-935(0.31) 1145-1170(2.87)                                                                               |
| gnl UG Hs#S11062794 | 1.18 | 1  | 123-149(1.18)                                                                                                                                         |
| gnl UG Hs#S11046637 | 3.91 | 1  | 768-793(3.91)                                                                                                                                         |
| gnl UG Hs#S1731239  | 0.13 | 1  | 1211-1237(0.13)                                                                                                                                       |
| gnl UG Hs#S1728063  | 0.69 | 2  | 621-646(0.65) 1165-1191(0.69)                                                                                                                         |
| gnl UG Hs#S14802702 | 4.3  | 1  | 715-740(4.30)                                                                                                                                         |
| gnl UG Hs#S3439046  | 3.36 | 1  | 191-217(3.36)                                                                                                                                         |
| gnl UG Hs#S15730319 | 3.47 | 1  | 1571-1596(3.47)                                                                                                                                       |
| gnl UG Hs#S1731236  | 0.74 | 1  | 41-66(0.74)                                                                                                                                           |
| gnl UG Hs#S4283649  | 3.6  | 4  | 276-302(3.60) 533-559(0.30) 654-678(0.73) 1767-1795(1.69)                                                                                             |
| gnl UG Hs#S1732164  | 4.3  | 1  | 51-76(4.30)                                                                                                                                           |
| gnl UG Hs#S4435440  | 0.22 | 1  | 1180-1207(0.22)                                                                                                                                       |
| gnl UG Hs#S1728933  | 2.13 | 3  | 177-200(1.25) 288-313(1.46) 502-527(2.13)                                                                                                             |
| gnl UG Hs#S1729264  | 0.3  | 2  | 1054-1077(0.04) 1151-1176(0.30)                                                                                                                       |
| gnl UG Hs#S2139470  | 2.4  | 2  | 602-627(2.40) 1133-1158(0.04)                                                                                                                         |
| gnl UG Hs#S2139373  | 1.33 | 2  | 26-49(0.20) 154-179(1.33)                                                                                                                             |
| gnl UG Hs#S5978504  | 1.52 | 2  | 122-145(1.52) 249-274(0.94)                                                                                                                           |
| gnl UG Hs#S2139448  | 1.5  | 1  | 162-188(1.50)                                                                                                                                         |

|                     |      |   |                                                                                                                                    |
|---------------------|------|---|------------------------------------------------------------------------------------------------------------------------------------|
| gnl UG Hs#S1728054  | 0.91 | 2 | 435-460(0.91) 1204-1227(0.55)                                                                                                      |
| gnl UG Hs#S4815639  | 2.72 | 7 | 223-251(0.30) 334-359(1.11) 982-1007(0.39) 1039-1064(0.65) 1095-1121(2.23) 2247-2272(0.01) 2456-2481(2.72)                         |
| gnl UG Hs#S2140140  | 2.5  | 1 | 349-374(2.50)                                                                                                                      |
| gnl UG Hs#S1726679  | 2.94 | 2 | 253-276(0.20) 288-313(2.94)                                                                                                        |
| gnl UG Hs#S1727504  | 4.94 | 1 | 217-242(4.94)                                                                                                                      |
| gnl UG Hs#S1731511  | 3.14 | 2 | 453-480(0.37) 494-520(3.14)                                                                                                        |
| gnl UG Hs#S3619617  | 0.4  | 1 | 222-250(0.40)                                                                                                                      |
| gnl UG Hs#S2140566  | 0.36 | 1 | 466-491(0.36)                                                                                                                      |
| gnl UG Hs#S4820813  | 4.37 | 9 | 3-28(3.87) 304-329(1.08) 336-361(0.43) 931-954(0.39) 965-990(4.37) 1853-1881(1.44) 2375-2401(2.49) 2535-2561(0.27) 2580-2605(0.31) |
| gnl UG Hs#S2293231  | 3.08 | 1 | 534-560(3.08)                                                                                                                      |
| gnl UG Hs#S14273476 | 0.81 | 1 | 226-251(0.81)                                                                                                                      |
| gnl UG Hs#S3333537  | 2.34 | 1 | 2725-2751(2.34)                                                                                                                    |
| gnl UG Hs#S4616461  | 0.92 | 1 | 1248-1273(0.92)                                                                                                                    |
| gnl UG Hs#S2333214  | 0.08 | 1 | 370-398(0.08)                                                                                                                      |
| gnl UG Hs#S1726364  | 2.17 | 1 | 78-103(2.17)                                                                                                                       |
| gnl UG Hs#S1090814  | 1.17 | 1 | 1464-1489(1.17)                                                                                                                    |
| gnl UG Hs#S1726480  | 0.85 | 3 | 725-753(0.36) 912-938(0.76) 1140-1168(0.85)                                                                                        |
| gnl UG Hs#S1731605  | 0.23 | 1 | 720-745(0.23)                                                                                                                      |
| gnl UG Hs#S1729883  | 2.3  | 2 | 13-38(2.30) 449-474(0.23)                                                                                                          |
| gnl UG Hs#S4808575  | 2.45 | 3 | 107-130(0.30) 177-203(2.45) 301-326(1.84)                                                                                          |
| gnl UG Hs#S4816305  | 5.49 | 4 | 144-169(3.30) 1128-1152(0.65) 1480-1505(0.94) 1980-2006(5.49)                                                                      |
| gnl UG Hs#S2293513  | 1.98 | 1 | 152-177(1.98)                                                                                                                      |
| gnl UG Hs#S1730839  | 0.82 | 1 | 329-355(0.82)                                                                                                                      |
| gnl UG Hs#S1824403  | 2.14 | 3 | 158-184(2.14) 260-284(1.78) 580-608(1.72)                                                                                          |
| gnl UG Hs#S10831672 | 1.71 | 1 | 203-231(1.71)                                                                                                                      |
| gnl UG Hs#S3601478  | 3.04 | 4 | 178-203(2.39) 416-441(3.04) 753-781(2.40) 795-820(2.47)                                                                            |
| gnl UG Hs#S1729223  | 0.5  | 4 | 37-65(0.08) 352-379(0.20) 1054-1080(0.17) 1129-1154(0.50)                                                                          |
| gnl UG Hs#S4045766  | 0.79 | 1 | 497-522(0.79)                                                                                                                      |
| gnl UG Hs#S3322109  | 1.86 | 7 | 674-701(0.36) 2219-2244(1.11) 2314-2340(0.50) 2419-2445(1.86) 2635-2663(0.17) 2826-2852(0.11) 3308-3336(0.98)                      |
| gnl UG Hs#S1727079  | 0.4  | 1 | 194-220(0.40)                                                                                                                      |
| gnl UG Hs#S4807539  | 2.79 | 1 | 499-522(2.79)                                                                                                                      |
| gnl UG Hs#S3602292  | 0.24 | 1 | 640-665(0.24)                                                                                                                      |
| gnl UG Hs#S2140025  | 1.71 | 1 | 203-231(1.71)                                                                                                                      |
| gnl UG Hs#S1569536  | 3.04 | 1 | 1598-1623(3.04)                                                                                                                    |
| gnl UG Hs#S15632441 | 2.36 | 4 | 657-682(0.46) 804-832(0.99) 1316-1343(2.01) 1455-1480(2.36)                                                                        |
| gnl UG Hs#S2139075  | 1.3  | 1 | 100-125(1.30)                                                                                                                      |
| gnl UG Hs#S1730795  | 2.57 | 3 | 695-720(0.08) 845-870(2.57) 883-907(1.36)                                                                                          |
| gnl UG Hs#S4814592  | 3.16 | 8 | 380-405(1.19) 652-677(0.98) 1055-1085(0.05) 1453-1481(3.16) 1713-1738(1.84) 2131-2154(1.72) 2184-2209(0.79) 2228-2253(0.78)        |
| gnl UG Hs#S816198   | 0.4  | 1 | 1398-1424(0.40)                                                                                                                    |
| gnl UG Hs#S4830959  | 1.98 | 4 | 817-842(1.98) 869-894(1.40) 1274-1302(1.57) 1616-1641(1.79)                                                                        |
| gnl UG Hs#S7111452  | 1.03 | 2 | 322-350(1.03) 1577-1603(0.66)                                                                                                      |
| gnl UG Hs#S4046176  | 1.62 | 1 | 157-182(1.62)                                                                                                                      |
| gnl UG Hs#S1730430  | 0.81 | 1 | 221-249(0.81)                                                                                                                      |
| gnl UG Hs#S1731283  | 0.01 | 1 | 36-62(0.01)                                                                                                                        |
| gnl UG Hs#S3987795  | 1.66 | 1 | 325-351(1.66)                                                                                                                      |
| gnl UG Hs#S3972976  | 4.98 | 5 | 557-582(3.52) 610-636(2.08) 740-765(4.98) 802-829(3.97) 1836-1862(3.17)                                                            |
| gnl UG Hs#S2294336  | 5.2  | 2 | 1376-1404(5.20) 2559-2584(3.37)                                                                                                    |
| gnl UG Hs#S3438160  | 0.62 | 1 | 281-305(0.62)                                                                                                                      |
| gnl UG Hs#S1727333  | 0.11 | 1 | 319-344(0.11)                                                                                                                      |
| gnl UG Hs#S1727360  | 0.72 | 3 | 929-954(0.23) 1006-1031(0.72) 1065-1091(0.36)                                                                                      |
| gnl UG Hs#S7111876  | 2.12 | 1 | 349-373(2.12)                                                                                                                      |
| gnl UG Hs#S2294510  | 0.95 | 1 | 187-214(0.95)                                                                                                                      |
| gnl UG Hs#S1726728  | 1.83 | 3 | 490-515(0.63) 1470-1496(0.50) 1500-1525(1.83)                                                                                      |
| gnl UG Hs#S1730060  | 1.86 | 2 | 602-628(0.12) 764-790(1.86)                                                                                                        |

|                     |      |                                                                                                                                      |
|---------------------|------|--------------------------------------------------------------------------------------------------------------------------------------|
| gnl UG Hs#S4546089  | 0.76 | 2 744-769(0.17) 776-801(0.76)                                                                                                        |
| gnl UG Hs#S3601562  | 0.91 | 1 656-681(0.91)                                                                                                                      |
| gnl UG Hs#S2138839  | 5.11 | 4 244-269(3.30) 1820-1846(2.08) 1874-1898(0.07) 2503-2528(5.11)                                                                      |
| gnl UG Hs#S3619641  | 0.04 | 1 550-575(0.04)                                                                                                                      |
| gnl UG Hs#S1732076  | 1.07 | 2 1374-1400(1.07) 1468-1493(0.50)                                                                                                    |
| gnl UG Hs#S1729825  | 4.62 | 2 159-184(4.62) 226-251(1.30)                                                                                                        |
| gnl UG Hs#S2329489  | 1.01 | 2 343-371(1.01) 1025-1051(0.30)                                                                                                      |
| gnl UG Hs#S1727952  | 1.48 | 1 689-714(1.48)                                                                                                                      |
| gnl UG Hs#S5931060  | 3.33 | 3 204-229(0.88) 234-259(0.30) 957-983(3.33)                                                                                          |
| gnl UG Hs#S3438745  | 0.54 | 1 210-235(0.54)                                                                                                                      |
| gnl UG Hs#S2294060  | 0.78 | 1 235-260(0.78)                                                                                                                      |
| gnl UG Hs#S1729897  | 4.09 | 1 383-408(4.09)                                                                                                                      |
| gnl UG Hs#S15632082 | 0.75 | 1 733-758(0.75)                                                                                                                      |
| gnl UG Hs#S1728262  | 0.76 | 1 601-627(0.76)                                                                                                                      |
| gnl UG Hs#S2293274  | 0.34 | 2 867-893(0.30) 987-1015(0.34)                                                                                                       |
| gnl UG Hs#S1729029  | 2.08 | 1 32-60(2.08)                                                                                                                        |
| gnl UG Hs#S6159015  | 4.52 | 3 420-445(4.52) 497-521(1.25) 537-563(1.17)                                                                                          |
| gnl UG Hs#S3438735  | 1.59 | 1 192-218(1.59)                                                                                                                      |
| gnl UG Hs#S3602281  | 4.59 | 3 186-211(0.08) 317-342(1.23) 674-702(4.59)                                                                                          |
| gnl UG Hs#S2139569  | 0.92 | 2 1231-1258(0.13) 1436-1463(0.92)                                                                                                    |
| gnl UG Hs#S10832500 | 4.11 | 2 1608-1633(2.89) 1715-1740(4.11)                                                                                                    |
| gnl UG Hs#S3219982  | 2.26 | 1 1342-1368(2.26)                                                                                                                    |
| gnl UG Hs#S1732420  | 2.36 | 3 449-474(2.36) 1098-1124(1.44) 1270-1295(0.16)                                                                                      |
| gnl UG Hs#S4829009  | 3.15 | 2 97-122(3.15) 222-247(0.20)                                                                                                         |
| gnl UG Hs#S4631282  | 0.5  | 1 713-739(0.50)                                                                                                                      |
| gnl UG Hs#S3973115  | 0.85 | 1 411-439(0.85)                                                                                                                      |
| gnl UG Hs#S2294474  | 1.68 | 1 549-575(1.68)                                                                                                                      |
| gnl UG Hs#S2139904  | 0.82 | 1 29-56(0.82)                                                                                                                        |
| gnl UG Hs#S2140090  | 1.47 | 2 230-253(1.47) 744-769(0.34)                                                                                                        |
| gnl UG Hs#S5978571  | 0.24 | 2 302-327(0.24) 1342-1367(0.24)                                                                                                      |
| gnl UG Hs#S3547087  | 5.23 | 2 1478-1503(5.23) 1616-1642(2.30)                                                                                                    |
| gnl UG Hs#S4284540  | 1.95 | 1 323-351(1.95)                                                                                                                      |
| gnl UG Hs#S1727881  | 2.56 | 2 168-195(0.03) 341-367(2.56)                                                                                                        |
| gnl UG Hs#S1728046  | 0.4  | 1 84-110(0.40)                                                                                                                       |
| gnl UG Hs#S4829089  | 1.63 | 4 311-337(0.72) 555-580(0.17) 917-945(0.23) 1106-1132(1.63)                                                                          |
| gnl UG Hs#S1726564  | 2.3  | 3 201-226(1.19) 306-331(2.30) 381-409(1.68)                                                                                          |
| gnl UG Hs#S3880632  | 2.73 | 5 686-712(2.67) 812-840(0.81) 892-915(2.73) 1434-1459(2.26) 1732-1757(0.04)                                                          |
| gnl UG Hs#S4825153  | 3.67 | 9 78-106(3.36) 164-192(2.13) 401-427(0.28) 522-547(0.07) 681-706(2.36) 725-754(2.46) 1098-1126(1.35) 1684-1709(3.67) 1747-1775(0.30) |
| gnl UG Hs#S1730025  | 2.23 | 1 742-767(2.23)                                                                                                                      |
| gnl UG Hs#S4045820  | 1.07 | 2 381-406(1.07) 446-473(0.44)                                                                                                        |
| gnl UG Hs#S891732   | 3.3  | 3 334-359(0.40) 704-729(1.56) 1359-1384(3.30)                                                                                        |
| gnl UG Hs#S2139586  | 0.91 | 1 729-754(0.91)                                                                                                                      |
| gnl UG Hs#S1728322  | 0.3  | 1 81-109(0.30)                                                                                                                       |
| gnl UG Hs#S1729570  | 0.27 | 1 887-912(0.27)                                                                                                                      |
| gnl UG Hs#S1731490  | 0.08 | 1 1219-1245(0.08)                                                                                                                    |
| gnl UG Hs#S1730261  | 1.82 | 1 1614-1639(1.82)                                                                                                                    |
| gnl UG Hs#S3333497  | 0.72 | 4 115-140(0.61) 652-677(0.66) 946-971(0.72) 1101-1127(0.17)                                                                          |
| gnl UG Hs#S1730243  | 2.63 | 2 481-508(2.63) 617-642(0.94)                                                                                                        |
| gnl UG Hs#S1728505  | 2.4  | 1 1758-1784(2.40)                                                                                                                    |
| gnl UG Hs#S4621518  | 0.75 | 1 564-592(0.75)                                                                                                                      |
| gnl UG Hs#S1727777  | 3.79 | 1 114-139(3.79)                                                                                                                      |
| gnl UG Hs#S3219369  | 1.72 | 4 91-116(1.61) 361-387(1.01) 1558-1584(0.08) 1668-1693(1.72)                                                                         |
| gnl UG Hs#S7112561  | 3.2  | 2 48-76(3.20) 183-208(0.84)                                                                                                          |
| gnl UG Hs#S7112028  | 2.69 | 2 410-435(0.17) 610-636(2.69)                                                                                                        |

|                     |      |   |                                                                                       |
|---------------------|------|---|---------------------------------------------------------------------------------------|
| gnl UG Hs#S4819287  | 1.01 | 3 | 306-331(0.57) 472-499(0.42) 844-868(1.01)                                             |
| gnl UG Hs#S2649410  | 0.98 | 1 | 777-803(0.98)                                                                         |
| gnl UG Hs#S1727948  | 0.94 | 1 | 843-868(0.94)                                                                         |
| gnl UG Hs#S3219340  | 2.66 | 2 | 874-902(2.66) 1165-1190(0.34)                                                         |
| gnl UG Hs#S1727652  | 1.56 | 1 | 118-143(1.56)                                                                         |
| gnl UG Hs#S4812109  | 1.72 | 4 | 780-806(0.04) 1453-1478(0.78) 1488-1513(1.72) 1556-1579(0.69)                         |
| gnl UG Hs#S3602315  | 2.54 | 1 | 1354-1380(2.54)                                                                       |
| gnl UG Hs#S1727166  | 2.86 | 1 | 34-60(2.86)                                                                           |
| gnl UG Hs#S2293429  | 0.59 | 2 | 1697-1722(0.48) 1730-1756(0.59)                                                       |
| gnl UG Hs#S1728588  | 2.88 | 1 | 105-133(2.88)                                                                         |
| gnl UG Hs#S3439012  | 0.94 | 2 | 64-89(0.94) 114-139(0.40)                                                             |
| gnl UG Hs#S4285059  | 7.36 | 6 | 40-68(1.42) 235-260(0.17) 301-326(2.97) 504-532(1.81) 1340-1365(1.08) 1570-1593(7.36) |
| gnl UG Hs#S2139564  | 2.52 | 4 | 618-643(1.04) 1039-1064(1.58) 1559-1584(2.52) 1591-1616(1.43)                         |
| gnl UG Hs#S2294028  | 2    | 2 | 103-132(2.00) 239-264(1.91)                                                           |
| gnl UG Hs#S2293910  | 1.84 | 3 | 45-73(1.49) 176-201(1.84) 387-412(0.94)                                               |
| gnl UG Hs#S1730350  | 1.36 | 2 | 48-73(1.36) 246-271(0.26)                                                             |
| gnl UG Hs#S11046568 | 1.46 | 2 | 932-960(0.30) 1171-1196(1.46)                                                         |
| gnl UG Hs#S4821428  | 0.66 | 1 | 980-1006(0.66)                                                                        |
| gnl UG Hs#S7089700  | 2.59 | 3 | 1449-1474(2.11) 1661-1687(1.40) 1859-1884(2.59)                                       |
| gnl UG Hs#S3219209  | 1.4  | 1 | 384-410(1.40)                                                                         |
| gnl UG Hs#S1732022  | 1.36 | 4 | 522-549(1.36) 810-835(0.43) 1511-1536(1.34) 1682-1707(1.13)                           |
| gnl UG Hs#S1824355  | 3.67 | 3 | 270-297(1.20) 316-341(3.67) 442-468(0.34)                                             |
| gnl UG Hs#S2293335  | 4.88 | 6 | 75-101(0.69) 111-139(4.88) 154-180(0.82) 183-210(0.72) 941-964(0.28) 1196-1222(0.07)  |
| gnl UG Hs#S11046699 | 0.79 | 1 | 596-621(0.79)                                                                         |
| gnl UG Hs#S2138967  | 1.58 | 1 | 119-144(1.58)                                                                         |
| gnl UG Hs#S4553355  | 3.69 | 1 | 2175-2200(3.69)                                                                       |
| gnl UG Hs#S1727214  | 2.62 | 1 | 70-98(2.62)                                                                           |
| gnl UG Hs#S3547108  | 4.62 | 1 | 202-228(4.62)                                                                         |
| gnl UG Hs#S3219378  | 1.4  | 3 | 61-86(1.13) 617-645(1.40) 661-686(0.79)                                               |
| gnl UG Hs#S4816931  | 0.2  | 1 | 607-632(0.20)                                                                         |
| gnl UG Hs#S2294176  | 0.6  | 1 | 698-724(0.60)                                                                         |
| gnl UG Hs#S3219964  | 1.98 | 1 | 57-83(1.98)                                                                           |
| gnl UG Hs#S10832601 | 1.6  | 2 | 892-920(0.66) 971-997(1.60)                                                           |
| gnl UG Hs#S1731098  | 0.9  | 1 | 1-28(0.90)                                                                            |
| gnl UG Hs#S3438591  | 2.11 | 1 | 1250-1275(2.11)                                                                       |
| gnl UG Hs#S1730884  | 2.48 | 1 | 293-318(2.48)                                                                         |
| gnl UG Hs#S4812927  | 1.82 | 3 | 2269-2297(0.40) 4164-4188(0.19) 4315-4341(1.82)                                       |
| gnl UG Hs#S14273064 | 0.72 | 2 | 1007-1032(0.72) 1174-1201(0.13)                                                       |
| gnl UG Hs#S1731592  | 1.3  | 3 | 408-435(0.47) 685-713(1.30) 1693-1718(1.23)                                           |
| gnl UG Hs#S4815503  | 1.17 | 2 | 3660-3686(1.17) 3784-3809(0.87)                                                       |
| gnl UG Hs#S1728913  | 0.22 | 1 | 188-213(0.22)                                                                         |
| gnl UG Hs#S1729144  | 2.72 | 1 | 90-116(2.72)                                                                          |
| gnl UG Hs#S5860361  | 0.88 | 2 | 560-588(0.20) 598-624(0.88)                                                           |
| gnl UG Hs#S3619543  | 0.57 | 1 | 422-447(0.57)                                                                         |
| gnl UG Hs#S7112231  | 2.35 | 2 | 396-420(2.35) 1162-1187(0.39)                                                         |
| gnl UG Hs#S3619219  | 5.85 | 3 | 233-258(0.36) 501-526(5.85) 557-581(1.52)                                             |
| gnl UG Hs#S1729906  | 1.66 | 2 | 460-488(1.66) 708-734(1.13)                                                           |
| gnl UG Hs#S4811049  | 0.87 | 1 | 1986-2011(0.87)                                                                       |
| gnl UG Hs#S2139848  | 1.2  | 2 | 544-571(1.20) 740-768(0.94)                                                           |
| gnl UG Hs#S4829704  | 3.11 | 3 | 384-412(0.49) 430-455(3.11) 3579-3605(1.91)                                           |
| gnl UG Hs#S5931246  | 0.23 | 1 | 648-673(0.23)                                                                         |
| gnl UG Hs#S4044584  | 1.81 | 1 | 636-664(1.81)                                                                         |
| gnl UG Hs#S2139595  | 2.17 | 4 | 772-800(0.23) 1335-1360(2.17) 1518-1541(1.13) 1797-1822(1.26)                         |
| gnl UG Hs#S2293512  | 0.84 | 1 | 384-409(0.84)                                                                         |

|                     |      |                                                                                                 |
|---------------------|------|-------------------------------------------------------------------------------------------------|
| gnl UG Hs#S1367637  | 2.43 | 6 781-807(0.20) 1041-1067(1.40) 1982-2009(2.10) 2361-2387(2.43) 2392-2417(2.11) 2611-2637(2.30) |
| gnl UG Hs#S5978400  | 3.11 | 1 405-430(3.11)                                                                                 |
| gnl UG Hs#S2139174  | 3.3  | 4 85-110(3.30) 221-247(1.10) 408-433(1.67) 1606-1631(2.35)                                      |
| gnl UG Hs#S1728573  | 2.49 | 3 1088-1116(2.49) 1728-1757(0.69) 1883-1908(0.14)                                               |
| gnl UG Hs#S2294613  | 1.39 | 1 32-57(1.39)                                                                                   |
| gnl UG Hs#S15631679 | 1.24 | 1 332-357(1.24)                                                                                 |
| gnl UG Hs#S3355555  | 2.53 | 2 54-79(1.08) 165-190(2.53)                                                                     |
| gnl UG Hs#S2140016  | 2.01 | 1 336-362(2.01)                                                                                 |
| gnl UG Hs#S1727842  | 2.14 | 2 323-348(2.14) 1108-1133(1.94)                                                                 |
| gnl UG Hs#S4844020  | 0.89 | 1 376-401(0.89)                                                                                 |
| gnl UG Hs#S1726212  | 0.39 | 1 586-611(0.39)                                                                                 |
| gnl UG Hs#S4807537  | 1.88 | 4 2242-2267(0.30) 2271-2296(0.08) 2325-2352(0.84) 2401-2428(1.88)                               |
| gnl UG Hs#S1732295  | 0.81 | 1 174-199(0.81)                                                                                 |
| gnl UG Hs#S1731304  | 1.34 | 4 583-608(0.13) 818-843(0.78) 920-948(1.03) 1350-1376(1.34)                                     |
| gnl UG Hs#S1728716  | 0.73 | 2 504-529(0.73) 692-720(0.25)                                                                   |
| gnl UG Hs#S2139080  | 1.72 | 1 1094-1119(1.72)                                                                               |
| gnl UG Hs#S1729836  | 2.58 | 3 1621-1646(2.58) 1899-1925(0.62) 1976-2001(0.30)                                               |
| gnl UG Hs#S1732383  | 0.82 | 1 96-119(0.82)                                                                                  |
| gnl UG Hs#S2139527  | 1.27 | 3 557-582(0.11) 1130-1156(0.72) 1179-1205(1.27)                                                 |
| gnl UG Hs#S1731536  | 3.89 | 1 478-503(3.89)                                                                                 |
| gnl UG Hs#S1727596  | 1.81 | 1 329-357(1.81)                                                                                 |
| gnl UG Hs#S2139455  | 1.16 | 2 878-906(1.16) 2130-2156(0.91)                                                                 |
| gnl UG Hs#S1824485  | 1.32 | 3 217-242(0.04) 244-270(0.59) 282-307(1.32)                                                     |
| gnl UG Hs#S1731075  | 2.26 | 3 186-212(0.95) 216-242(0.08) 866-890(2.26)                                                     |
| gnl UG Hs#S2138996  | 1.04 | 1 866-891(1.04)                                                                                 |
| gnl UG Hs#S4631186  | 0.23 | 1 193-218(0.23)                                                                                 |
| gnl UG Hs#S2138712  | 1.39 | 2 958-983(1.39) 1004-1030(1.31)                                                                 |
| gnl UG Hs#S1728271  | 1.69 | 2 227-253(1.69) 342-367(0.05)                                                                   |
| gnl UG Hs#S10832698 | 3.55 | 2 119-144(3.07) 251-277(3.55)                                                                   |
| gnl UG Hs#S3219003  | 0.5  | 1 275-300(0.50)                                                                                 |
| gnl UG Hs#S3803643  | 0.08 | 1 947-972(0.08)                                                                                 |
| gnl UG Hs#S2293659  | 0.84 | 2 491-515(0.84) 804-832(0.16)                                                                   |
| gnl UG Hs#S2140631  | 1.46 | 3 410-435(1.18) 529-555(0.18) 673-698(1.46)                                                     |
| gnl UG Hs#S3438896  | 0.98 | 1 529-554(0.98)                                                                                 |
| gnl UG Hs#S4615846  | 0.53 | 1 256-280(0.53)                                                                                 |
| gnl UG Hs#S11590971 | 0.3  | 1 950-978(0.30)                                                                                 |
| gnl UG Hs#S1729780  | 0.07 | 1 162-185(0.07)                                                                                 |
| gnl UG Hs#S6158687  | 0.65 | 2 116-143(0.57) 175-199(0.65)                                                                   |
| gnl UG Hs#S15632978 | 0.46 | 1 108-131(0.46)                                                                                 |
| gnl UG Hs#S6664653  | 8.43 | 5 133-161(1.17) 182-209(0.36) 414-439(2.01) 570-595(8.43) 749-777(0.49)                         |
| gnl UG Hs#S4284725  | 0.26 | 1 1229-1254(0.26)                                                                               |
| gnl UG Hs#S4631175  | 1.77 | 3 879-902(0.75) 928-954(1.77) 1104-1129(0.10)                                                   |
| gnl UG Hs#S7111365  | 1.79 | 1 386-411(1.79)                                                                                 |
| gnl UG Hs#S4621036  | 1.08 | 1 3175-3201(1.08)                                                                               |
| gnl UG Hs#S1726291  | 1.88 | 4 558-584(0.50) 757-783(1.88) 3199-3224(1.04) 4369-4394(0.08)                                   |
| gnl UG Hs#S3781958  | 1.37 | 1 700-725(1.37)                                                                                 |
| gnl UG Hs#S1729991  | 3.04 | 3 857-883(1.43) 1623-1647(0.68) 1932-1958(3.04)                                                 |
| gnl UG Hs#S1727314  | 0.72 | 2 1039-1065(0.33) 1588-1613(0.72)                                                               |
| gnl UG Hs#S1726972  | 3.08 | 1 199-225(3.08)                                                                                 |
| gnl UG Hs#S4284516  | 0.17 | 1 268-293(0.17)                                                                                 |
| gnl UG Hs#S2140099  | 1.4  | 1 1928-1951(1.40)                                                                               |
| gnl UG Hs#S4620966  | 3.3  | 1 1002-1027(3.30)                                                                               |
| gnl UG Hs#S3219111  | 3.2  | 1 529-555(3.20)                                                                                 |
| gnl UG Hs#S4623515  | 0.94 | 3 618-644(0.17) 927-953(0.94) 1032-1059(0.23)                                                   |

|                     |      |                                                                                                                                                            |
|---------------------|------|------------------------------------------------------------------------------------------------------------------------------------------------------------|
| gnl UG Hs#S4825305  | 3.04 | 7 112-137(3.04) 905-930(12.43) 1279-1306(1.88) 2475-2503(1.44) 2735-2763(0.04) 3040-3066(2.75) 3266-3291(0.10)                                             |
| gnl UG Hs#S1726769  | 2.49 | 9 3290-3316(0.08) 5465-5492(0.45) 5657-5682(1.04) 5699-5723(2.49) 6971-6998(1.84) 7108-7134(0.98) 7135-7160(0.91) 8024-8050(0.86) 8975-8999(0.41)          |
| gnl UG Hs#S3439819  | 0.85 | 2 428-455(0.43) 594-619(0.85)                                                                                                                              |
| gnl UG Hs#S3219806  | 2.3  | 1 47-73(2.30)                                                                                                                                              |
| gnl UG Hs#S1726217  | 2.98 | 2 189-215(0.01) 1199-1224(2.98)                                                                                                                            |
| gnl UG Hs#S1727639  | 3.27 | 1 220-246(3.27)                                                                                                                                            |
| gnl UG Hs#S4816947  | 1.98 | 1 2477-2503(1.98)                                                                                                                                          |
| gnl UG Hs#S3993714  | 0.04 | 1 1050-1075(0.04)                                                                                                                                          |
| gnl UG Hs#S2138972  | 4.26 | 2 2825-2850(2.08) 3247-3272(4.26)                                                                                                                          |
| gnl UG Hs#S3438885  | 3.58 | 1 558-583(3.58)                                                                                                                                            |
| gnl UG Hs#S10831566 | 2.08 | 7 3776-3801(1.67) 4643-4668(0.04) 5011-5037(1.13) 5751-5778(0.03) 5986-6009(1.04) 6046-6070(1.45) 7033-7059(2.08)                                          |
| gnl UG Hs#S14272962 | 0.17 | 1 210-235(0.17)                                                                                                                                            |
| gnl UG Hs#S3439087  | 0.52 | 2 201-227(0.50) 657-685(0.52)                                                                                                                              |
| gnl UG Hs#S15631435 | 1.24 | 1 941-968(1.24)                                                                                                                                            |
| gnl UG Hs#S7113123  | 1.24 | 1 315-342(1.24)                                                                                                                                            |
| gnl UG Hs#S3987119  | 4.3  | 5 17-45(0.03) 137-161(0.07) 1439-1465(0.54) 1651-1676(4.30) 1849-1874(0.58)                                                                                |
| gnl UG Hs#S3881036  | 1.13 | 3 182-207(1.13) 760-786(0.30) 833-859(0.58)                                                                                                                |
| gnl UG Hs#S1730331  | 0.94 | 2 650-676(0.94) 1127-1152(0.20)                                                                                                                            |
| gnl UG Hs#S4546207  | 0.62 | 2 18-45(0.62) 122-150(0.23)                                                                                                                                |
| gnl UG Hs#S1729657  | 0.98 | 3 421-447(0.16) 798-824(0.98) 1033-1058(0.65)                                                                                                              |
| gnl UG Hs#S1728457  | 1.47 | 1 1432-1457(1.47)                                                                                                                                          |
| gnl UG Hs#S15631492 | 3.62 | 1 299-324(3.62)                                                                                                                                            |
| gnl UG Hs#S14802363 | 0.4  | 1 264-290(0.40)                                                                                                                                            |
| gnl UG Hs#S2294368  | 1.56 | 3 100-125(0.91) 255-280(1.56) 373-398(1.49)                                                                                                                |
| gnl UG Hs#S2139378  | 1.11 | 4 304-330(0.73) 539-565(0.27) 709-735(0.56) 883-908(1.11)                                                                                                  |
| gnl UG Hs#S4285156  | 3.13 | 2 172-197(0.46) 214-239(3.13)                                                                                                                              |
| gnl UG Hs#S1731498  | 3.3  | 10 112-138(2.33) 167-192(1.41) 659-684(3.30) 953-978(0.82) 1246-1274(1.64) 1323-1348(0.23) 1865-1891(1.23) 2043-2068(1.17) 2350-2375(0.72) 2431-2459(0.75) |
| gnl UG Hs#S1731530  | 2.62 | 1 262-287(2.62)                                                                                                                                            |
| gnl UG Hs#S1729379  | 0.77 | 1 296-321(0.77)                                                                                                                                            |
| gnl UG Hs#S1732034  | 0.82 | 2 168-192(0.82) 703-728(0.62)                                                                                                                              |
| gnl UG Hs#S10831770 | 2.66 | 3 162-187(0.40) 235-258(0.07) 1318-1346(2.66)                                                                                                              |
| gnl UG Hs#S3438870  | 0.66 | 1 381-409(0.66)                                                                                                                                            |
| gnl UG Hs#S1731577  | 2.14 | 3 1281-1306(0.72) 2391-2417(0.53) 2989-3014(2.14)                                                                                                          |
| gnl UG Hs#S2139657  | 0.66 | 6 162-190(0.09) 227-252(0.66) 1013-1039(0.33) 1598-1624(0.33) 1994-2022(0.62) 2067-2094(0.30)                                                              |
| gnl UG Hs#S2138799  | 2.61 | 9 14-42(1.23) 169-196(2.61) 460-485(1.57) 1367-1392(1.36) 1797-1822(0.85) 2094-2119(0.08) 2224-2249(0.13) 2707-2732(0.17) 2804-2832(1.23)                  |
| gnl UG Hs#S2140585  | 2.89 | 2 893-918(0.27) 1432-1458(2.89)                                                                                                                            |
| gnl UG Hs#S3219089  | 1.08 | 1 88-114(1.08)                                                                                                                                             |
| gnl UG Hs#S3219242  | 3.33 | 2 104-129(1.40) 214-240(3.33)                                                                                                                              |
| gnl UG Hs#S1729355  | 5.11 | 1 700-727(5.11)                                                                                                                                            |
| gnl UG Hs#S1728448  | 1.17 | 1 196-222(1.17)                                                                                                                                            |
| gnl UG Hs#S4285237  | 2.85 | 2 31-56(0.33) 476-501(2.85)                                                                                                                                |
| gnl UG Hs#S2293482  | 2.17 | 1 814-840(2.17)                                                                                                                                            |
| gnl UG Hs#S4817903  | 0.43 | 1 126-151(0.43)                                                                                                                                            |
| gnl UG Hs#S15631459 | 2.97 | 3 78-103(2.97) 391-414(0.14) 433-458(0.24)                                                                                                                 |
| gnl UG Hs#S15633585 | 2.06 | 1 1291-1317(2.06)                                                                                                                                          |
| gnl UG Hs#S4809641  | 2.5  | 2 16-41(2.50) 59-85(0.50)                                                                                                                                  |
| gnl UG Hs#S1730401  | 1.56 | 2 218-244(1.56) 270-295(0.98)                                                                                                                              |
| gnl UG Hs#S2294500  | 4.58 | 1 259-284(4.58)                                                                                                                                            |
| gnl UG Hs#S1726321  | 2.43 | 2 827-852(2.43) 889-917(0.81)                                                                                                                              |
| gnl UG Hs#S1729309  | 2.69 | 3 243-267(0.34) 1023-1048(2.03) 1233-1257(2.69)                                                                                                            |
| gnl UG Hs#S2139479  | 3.01 | 6 533-562(1.26) 593-618(0.50) 727-753(1.60) 1196-1221(0.94) 1541-1567(2.10) 1728-1754(3.01)                                                                |
| gnl UG Hs#S1727539  | 0.46 | 2 156-182(0.45) 356-382(0.46)                                                                                                                              |
| gnl UG Hs#S2139412  | 0.72 | 2 94-119(0.30) 439-464(0.72)                                                                                                                               |
| gnl UG Hs#S4807776  | 2.07 | 4 111-136(1.65) 453-478(1.57) 546-572(1.17) 928-956(2.07)                                                                                                  |

|                     |      |                                                                                                 |
|---------------------|------|-------------------------------------------------------------------------------------------------|
| gnl UG Hs#S3619316  | 0.94 | 1 643-668(0.94)                                                                                 |
| gnl UG Hs#S1728182  | 1.36 | 2 301-328(0.71) 746-771(1.36)                                                                   |
| gnl UG Hs#S1729121  | 1.92 | 3 147-175(1.92) 500-528(0.33) 821-845(1.19)                                                     |
| gnl UG Hs#S3219574  | 0.44 | 1 675-701(0.44)                                                                                 |
| gnl UG Hs#S1730715  | 0.71 | 5 972-995(0.43) 1317-1342(0.09) 1353-1380(0.71) 1445-1472(0.66) 1487-1512(0.43)                 |
| gnl UG Hs#S3437941  | 2.17 | 1 524-549(2.17)                                                                                 |
| gnl UG Hs#S3603832  | 2.89 | 1 2489-2513(2.89)                                                                               |
| gnl UG Hs#S1729323  | 1.07 | 2 232-257(0.63) 272-298(1.07)                                                                   |
| gnl UG Hs#S1731172  | 1.4  | 3 535-561(0.42) 610-638(0.81) 1776-1800(1.40)                                                   |
| gnl UG Hs#S4392297  | 1.23 | 2 25-53(0.30) 1335-1360(1.23)                                                                   |
| gnl UG Hs#S1728622  | 1.23 | 3 945-970(0.62) 2141-2167(1.23) 2342-2366(0.48)                                                 |
| gnl UG Hs#S1729122  | 0.81 | 2 191-216(0.81) 528-554(0.77)                                                                   |
| gnl UG Hs#S1726609  | 4.2  | 1 306-331(4.20)                                                                                 |
| gnl UG Hs#S1730204  | 3.13 | 1 154-179(3.13)                                                                                 |
| gnl UG Hs#S7110779  | 1.53 | 1 825-850(1.53)                                                                                 |
| gnl UG Hs#S1730235  | 1.11 | 1 1009-1037(1.11)                                                                               |
| gnl UG Hs#S2139512  | 1.83 | 6 697-725(1.83) 734-757(1.47) 1274-1299(0.76) 2019-2044(1.79) 2302-2330(1.71) 2979-3004(1.26)   |
| gnl UG Hs#S2294212  | 6.18 | 1 1899-1925(6.18)                                                                               |
| gnl UG Hs#S4810696  | 3.04 | 1 1181-1207(3.04)                                                                               |
| gnl UG Hs#S3619172  | 2.34 | 1 452-478(2.34)                                                                                 |
| gnl UG Hs#S7112752  | 1.94 | 1 573-600(1.94)                                                                                 |
| gnl UG Hs#S4809996  | 0.94 | 1 1460-1488(0.94)                                                                               |
| gnl UG Hs#S3219989  | 1.57 | 3 66-91(1.57) 144-169(0.49) 1301-1328(0.59)                                                     |
| gnl UG Hs#S2139666  | 1.26 | 2 731-756(1.26) 1052-1077(0.07)                                                                 |
| gnl UG Hs#S1731981  | 0.55 | 1 2043-2068(0.55)                                                                               |
| gnl UG Hs#S2138934  | 1.65 | 1 42-69(1.65)                                                                                   |
| gnl UG Hs#S10832514 | 1.68 | 3 223-247(1.68) 825-849(0.52) 1170-1198(0.04)                                                   |
| gnl UG Hs#S2294206  | 6.18 | 1 1899-1925(6.18)                                                                               |
| gnl UG Hs#S4813198  | 1.82 | 5 703-727(1.03) 891-917(1.82) 1471-1497(0.44) 1562-1590(0.01) 2381-2405(0.13)                   |
| gnl UG Hs#S1728963  | 0.3  | 1 1639-1664(0.30)                                                                               |
| gnl UG Hs#S7110806  | 1.83 | 3 80-105(0.40) 830-856(1.83) 1026-1052(0.62)                                                    |
| gnl UG Hs#S1824382  | 0.85 | 1 1349-1374(0.85)                                                                               |
| gnl UG Hs#S4545927  | 0.08 | 1 327-352(0.08)                                                                                 |
| gnl UG Hs#S15638359 | 1.53 | 1 440-468(1.53)                                                                                 |
| gnl UG Hs#S5495009  | 1.4  | 1 473-501(1.40)                                                                                 |
| gnl UG Hs#S4811144  | 2.4  | 6 523-551(2.40) 1635-1660(2.36) 2032-2056(0.04) 2562-2587(2.06) 3036-3064(0.08) 3195-3223(0.30) |
| gnl UG Hs#S2140365  | 0.94 | 1 452-478(0.94)                                                                                 |
| gnl UG Hs#S1726450  | 1.27 | 1 515-542(1.27)                                                                                 |
| gnl UG Hs#S3619137  | 0.23 | 2 474-499(0.23) 611-636(0.20)                                                                   |
| gnl UG Hs#S1726467  | 1.2  | 1 944-969(1.20)                                                                                 |
| gnl UG Hs#S11046623 | 0.6  | 1 173-199(0.60)                                                                                 |
| gnl UG Hs#S2294521  | 0.01 | 1 51-77(0.01)                                                                                   |
| gnl UG Hs#S3220020  | 0.4  | 2 522-547(0.40) 1901-1927(0.16)                                                                 |
| gnl UG Hs#S2293395  | 2.36 | 3 422-447(1.89) 468-493(2.36) 519-545(1.04)                                                     |
| gnl UG Hs#S1728569  | 2.07 | 1 110-137(2.07)                                                                                 |
| gnl UG Hs#S3438693  | 0.07 | 1 1491-1516(0.07)                                                                               |
| gnl UG Hs#S1728057  | 4.04 | 4 474-499(4.04) 500-525(1.21) 701-726(1.20) 740-766(3.56)                                       |
| gnl UG Hs#S1090362  | 3.78 | 6 652-677(0.22) 736-761(3.78) 1783-1808(0.07) 2066-2092(1.59) 2575-2602(0.88) 3096-3122(0.40)   |
| gnl UG Hs#S4829277  | 4.82 | 2 616-642(4.82) 976-1001(1.78)                                                                  |
| gnl UG Hs#S15846847 | 1.99 | 2 946-973(1.99) 1280-1305(1.04)                                                                 |
| gnl UG Hs#S2652923  | 2.15 | 4 484-510(1.30) 656-682(1.17) 683-711(0.42) 814-840(2.15)                                       |
| gnl UG Hs#S1732005  | 1.03 | 2 61-89(1.03) 252-278(0.89)                                                                     |
| gnl UG Hs#S11590920 | 4.26 | 5 156-185(3.11) 563-591(1.98) 604-629(2.52) 984-1009(1.17) 1063-1088(4.26)                      |
| gnl UG Hs#S3993887  | 3.36 | 2 70-96(3.36) 432-457(1.55)                                                                     |



|                     |      |                                                                                           |
|---------------------|------|-------------------------------------------------------------------------------------------|
| gnl UG Hs#S3219912  | 1.4  | 1 1194-1219(1.40)                                                                         |
| gnl UG Hs#S1728771  | 0.13 | 1 562-587(0.13)                                                                           |
| gnl UG Hs#S1729278  | 4.3  | 1 1730-1755(4.30)                                                                         |
| gnl UG Hs#S4828158  | 0.66 | 1 82-108(0.66)                                                                            |
| gnl UG Hs#S11046727 | 1.5  | 1 1012-1037(1.50)                                                                         |
| gnl UG Hs#S1731426  | 1.65 | 1 1176-1201(1.65)                                                                         |
| gnl UG Hs#S3219930  | 0.46 | 1 839-864(0.46)                                                                           |
| gnl UG Hs#S4545978  | 0.59 | 1 250-275(0.59)                                                                           |
| gnl UG Hs#S1728487  | 2.88 | 1 438-467(2.88)                                                                           |
| gnl UG Hs#S1729404  | 0.52 | 1 874-902(0.52)                                                                           |
| gnl UG Hs#S3333458  | 1.86 | 2 229-257(0.71) 344-370(1.86)                                                             |
| gnl UG Hs#S2293635  | 2.57 | 2 767-793(0.93) 1032-1057(2.57)                                                           |
| gnl UG Hs#S4813933  | 1.14 | 1 3004-3029(1.14)                                                                         |
| gnl UG Hs#S2140555  | 3.4  | 3 915-940(1.29) 1331-1356(1.30) 3961-3987(3.40)                                           |
| gnl UG Hs#S14273179 | 4.3  | 2 362-390(2.62) 624-649(4.30)                                                             |
| gnl UG Hs#S3219252  | 3.6  | 5 208-233(1.08) 787-816(1.92) 828-853(0.04) 944-969(2.87) 1233-1259(3.60)                 |
| gnl UG Hs#S4554609  | 0.89 | 1 583-608(0.89)                                                                           |
| gnl UG Hs#S4554042  | 3.44 | 2 262-287(3.44) 657-682(0.86)                                                             |
| gnl UG Hs#S1729098  | 1.72 | 2 487-513(0.07) 540-565(1.72)                                                             |
| gnl UG Hs#S1731804  | 3.2  | 5 918-946(0.49) 1036-1062(0.91) 1827-1852(3.20) 2104-2127(0.95) 2214-2239(0.72)           |
| gnl UG Hs#S4554045  | 1.04 | 3 103-128(0.91) 674-699(0.57) 780-805(1.04)                                               |
| gnl UG Hs#S2294380  | 4.62 | 6 116-141(3.14) 626-655(3.70) 892-917(0.98) 924-949(0.17) 1885-1910(4.62) 2036-2061(0.24) |
| gnl UG Hs#S3547119  | 2.2  | 1 1158-1185(2.20)                                                                         |
| gnl UG Hs#S1732409  | 2.01 | 2 296-322(2.01) 477-502(0.46)                                                             |
| gnl UG Hs#S3987297  | 4.4  | 1 55-81(4.40)                                                                             |
| gnl UG Hs#S1730985  | 0.81 | 3 18-44(0.23) 48-74(0.17) 585-613(0.81)                                                   |
| gnl UG Hs#S4631513  | 0.08 | 1 576-601(0.08)                                                                           |
| gnl UG Hs#S10832421 | 1.92 | 5 252-278(0.52) 587-612(0.98) 1048-1073(1.92) 1336-1361(1.17) 1691-1715(1.04)             |
| gnl UG Hs#S5518167  | 1.77 | 1 2556-2581(1.77)                                                                         |
| gnl UG Hs#S5979244  | 3.43 | 2 249-274(1.17) 282-305(3.43)                                                             |
| gnl UG Hs#S3219503  | 0.98 | 1 71-96(0.98)                                                                             |
| gnl UG Hs#S2294458  | 0.76 | 2 70-95(0.72) 163-189(0.76)                                                               |
| gnl UG Hs#S4821390  | 1.94 | 1 1483-1508(1.94)                                                                         |
| gnl UG Hs#S14802253 | 1.08 | 2 58-83(0.14) 387-412(1.08)                                                               |
| gnl UG Hs#S1726429  | 1.9  | 4 125-150(1.90) 555-580(0.82) 592-618(1.50) 957-982(0.53)                                 |
| gnl UG Hs#S7110997  | 1.82 | 1 869-895(1.82)                                                                           |
| gnl UG Hs#S3603201  | 3.26 | 1 283-309(3.26)                                                                           |
| gnl UG Hs#S2293694  | 0.5  | 1 259-284(0.50)                                                                           |
| gnl UG Hs#S2140120  | 3.2  | 2 252-275(1.89) 339-366(3.20)                                                             |
| gnl UG Hs#S7110126  | 1.87 | 1 270-296(1.87)                                                                           |
| gnl UG Hs#S3439064  | 2.17 | 4 320-347(0.16) 708-734(0.34) 763-787(2.17) 865-890(1.72)                                 |
| gnl UG Hs#S2293386  | 1.7  | 1 1136-1161(1.70)                                                                         |
| gnl UG Hs#S2293726  | 0.72 | 2 1037-1062(0.72) 1117-1145(0.12)                                                         |
| gnl UG Hs#S2139615  | 3.52 | 2 8-34(0.30) 372-398(3.52)                                                                |
| gnl UG Hs#S2293598  | 1.5  | 1 382-407(1.50)                                                                           |
| gnl UG Hs#S5978589  | 0.03 | 1 166-195(0.03)                                                                           |
| gnl UG Hs#S1731631  | 0.4  | 2 115-138(0.08) 193-219(0.40)                                                             |
| gnl UG Hs#S5860329  | 1.51 | 1 766-790(1.51)                                                                           |
| gnl UG Hs#S3219836  | 0.78 | 2 264-290(0.78) 363-388(0.65)                                                             |
| gnl UG Hs#S998710   | 0.95 | 5 473-499(0.46) 739-764(0.16) 1954-1979(0.72) 2370-2395(0.50) 2427-2453(0.95)             |
| gnl UG Hs#S1726582  | 3.62 | 3 1-26(3.62) 839-865(0.50) 943-968(1.81)                                                  |
| gnl UG Hs#S1729758  | 3.89 | 2 79-105(3.89) 197-225(2.10)                                                              |
| gnl UG Hs#S1824450  | 1.3  | 1 1157-1183(1.30)                                                                         |
| gnl UG Hs#S1726752  | 3.3  | 2 15-43(3.30) 171-200(1.43)                                                               |

|                     |      |                                                                                                                                               |
|---------------------|------|-----------------------------------------------------------------------------------------------------------------------------------------------|
| gnl UG Hs#S1729681  | 1.52 | 2 261-289(0.43) 607-633(1.52)                                                                                                                 |
| gnl UG Hs#S1824274  | 1.57 | 1 218-243(1.57)                                                                                                                               |
| gnl UG Hs#S4615941  | 1.09 | 2 202-227(1.09) 2560-2585(0.33)                                                                                                               |
| gnl UG Hs#S2138678  | 3.89 | 1 1321-1347(3.89)                                                                                                                             |
| gnl UG Hs#S5979197  | 2.98 | 9 225-250(0.81) 519-544(2.98) 1199-1224(1.17) 1253-1278(1.14) 1301-1329(1.88) 1449-1476(0.34) 2197-2222(2.08) 2564-2589(0.23) 3105-3131(0.18) |
| gnl UG Hs#S4622735  | 2.03 | 4 86-113(2.03) 2374-2399(0.43) 2867-2892(0.36) 3681-3709(0.94)                                                                                |
| gnl UG Hs#S4813468  | 1.81 | 1 176-204(1.81)                                                                                                                               |
| gnl UG Hs#S4045760  | 4.3  | 5 313-338(0.43) 495-520(1.55) 1083-1108(0.55) 1346-1371(1.00) 1465-1490(4.30)                                                                 |
| gnl UG Hs#S1727789  | 7.4  | 1 160-185(7.40)                                                                                                                               |
| gnl UG Hs#S11046574 | 0.43 | 2 55-81(0.20) 473-498(0.43)                                                                                                                   |
| gnl UG Hs#S2139504  | 0.39 | 1 2485-2510(0.39)                                                                                                                             |
| gnl UG Hs#S1732446  | 3.82 | 3 505-530(0.53) 1711-1737(3.82) 2039-2065(0.24)                                                                                               |
| gnl UG Hs#S3438359  | 0.2  | 2 1342-1369(0.03) 1528-1553(0.20)                                                                                                             |
| gnl UG Hs#S1971516  | 3.04 | 3 1868-1894(1.26) 2744-2767(0.62) 2771-2796(3.04)                                                                                             |
| gnl UG Hs#S3219349  | 0.92 | 1 868-895(0.92)                                                                                                                               |
| gnl UG Hs#S15846883 | 1.07 | 1 104-132(1.07)                                                                                                                               |
| gnl UG Hs#S1727783  | 1.08 | 3 81-106(0.11) 118-141(1.07) 268-293(1.08)                                                                                                    |
| gnl UG Hs#S3219221  | 1.72 | 2 230-257(0.07) 570-598(1.72)                                                                                                                 |
| gnl UG Hs#S3438831  | 0.18 | 1 262-288(0.18)                                                                                                                               |
| gnl UG Hs#S4553570  | 0.04 | 1 540-565(0.04)                                                                                                                               |
| gnl UG Hs#S3219608  | 0.23 | 1 1221-1247(0.23)                                                                                                                             |
| gnl UG Hs#S4825587  | 0.62 | 2 354-379(0.08) 1384-1410(0.62)                                                                                                               |
| gnl UG Hs#S4830721  | 1.4  | 5 102-127(0.72) 378-406(0.59) 831-859(1.40) 1217-1242(0.99) 1591-1616(0.27)                                                                   |
| gnl UG Hs#S4616405  | 0.16 | 1 555-583(0.16)                                                                                                                               |
| gnl UG Hs#S3988465  | 0.89 | 1 1029-1054(0.89)                                                                                                                             |
| gnl UG Hs#S3547220  | 4.04 | 1 1009-1034(4.04)                                                                                                                             |
| gnl UG Hs#S3438975  | 3.46 | 1 311-336(3.46)                                                                                                                               |
| gnl UG Hs#S1732447  | 1.4  | 1 457-485(1.40)                                                                                                                               |
| gnl UG Hs#S5930822  | 1.75 | 1 350-375(1.75)                                                                                                                               |
| gnl UG Hs#S1729085  | 1.75 | 4 552-580(1.75) 660-685(0.65) 834-859(0.72) 1148-1174(0.26)                                                                                   |
| gnl UG Hs#S2139535  | 0.23 | 1 565-591(0.23)                                                                                                                               |
| gnl UG Hs#S3220203  | 0.66 | 1 521-544(0.66)                                                                                                                               |
| gnl UG Hs#S1730130  | 0.6  | 1 1409-1435(0.60)                                                                                                                             |
| gnl UG Hs#S3438530  | 3.71 | 5 186-211(1.30) 260-288(3.02) 1352-1378(0.01) 1714-1742(3.71) 2275-2301(0.75)                                                                 |
| gnl UG Hs#S5978477  | 0.3  | 2 252-278(0.30) 1511-1537(0.30)                                                                                                               |
| gnl UG Hs#S4828672  | 1.57 | 1 28-53(1.57)                                                                                                                                 |
| gnl UG Hs#S2139781  | 1.72 | 6 217-242(0.79) 284-310(0.18) 747-772(0.58) 1219-1245(1.72) 1517-1542(0.04) 1710-1736(0.33)                                                   |
| gnl UG Hs#S2293652  | 0.91 | 2 672-697(0.91) 862-887(0.50)                                                                                                                 |
| gnl UG Hs#S3803398  | 0.33 | 1 299-324(0.33)                                                                                                                               |
| gnl UG Hs#S3219896  | 2.85 | 3 53-76(2.85) 694-719(0.87) 864-889(1.44)                                                                                                     |
| gnl UG Hs#S4623489  | 6.56 | 7 553-578(0.98) 1357-1382(0.36) 1670-1695(0.52) 1950-1975(6.56) 2067-2095(1.27) 2439-2464(1.23) 2495-2521(1.01)                               |
| gnl UG Hs#S1732010  | 0.56 | 2 195-220(0.30) 313-339(0.56)                                                                                                                 |
| gnl UG Hs#S2140676  | 4.24 | 7 101-124(0.43) 759-785(4.24) 1264-1289(3.40) 1320-1345(1.14) 2085-2111(0.53) 2128-2155(2.11) 2272-2297(1.98)                                 |
| gnl UG Hs#S2139395  | 0.57 | 1 417-443(0.57)                                                                                                                               |
| gnl UG Hs#S1729531  | 0.58 | 1 184-211(0.58)                                                                                                                               |
| gnl UG Hs#S4554600  | 2.21 | 2 662-686(2.21) 770-797(0.39)                                                                                                                 |
| gnl UG Hs#S4822962  | 0.49 | 2 41-66(0.49) 118-147(0.07)                                                                                                                   |
| gnl UG Hs#S15631390 | 1.56 | 4 23-51(1.15) 356-382(1.56) 571-594(1.09) 639-664(0.72)                                                                                       |
| gnl UG Hs#S4826083  | 2.81 | 2 1150-1175(2.81) 1695-1720(1.30)                                                                                                             |
| gnl UG Hs#S2140394  | 1.42 | 4 326-351(0.17) 353-379(0.56) 1505-1530(0.31) 1660-1688(1.42)                                                                                 |
| gnl UG Hs#S1824491  | 0.91 | 1 217-243(0.91)                                                                                                                               |
| gnl UG Hs#S15631989 | 2.15 | 8 97-122(2.07) 874-900(2.15) 1552-1578(0.62) 1913-1940(0.56) 3022-3048(0.39) 4204-4232(0.81) 4350-4375(0.29) 4405-4430(0.08)                  |
| gnl UG Hs#S7111704  | 3.75 | 1 1804-1830(3.75)                                                                                                                             |
| gnl UG Hs#S1972723  | 0.27 | 1 3127-3153(0.27)                                                                                                                             |

|                     |      |                                                                                                                                                                                            |
|---------------------|------|--------------------------------------------------------------------------------------------------------------------------------------------------------------------------------------------|
| gnl UG Hs#S2139255  | 0.88 | 2 165-191(0.88) 233-258(0.30)                                                                                                                                                              |
| gnl UG Hs#S1731294  | 0.46 | 1 404-429(0.46)                                                                                                                                                                            |
| gnl UG Hs#S10831869 | 0.2  | 1 2083-2108(0.20)                                                                                                                                                                          |
| gnl UG Hs#S4827264  | 5.18 | 4 563-588(0.10) 605-630(3.67) 736-761(0.08) 790-816(5.18)                                                                                                                                  |
| gnl UG Hs#S2139265  | 0.59 | 1 83-108(0.59)                                                                                                                                                                             |
| gnl UG Hs#S3619182  | 0.08 | 1 128-156(0.08)                                                                                                                                                                            |
| gnl UG Hs#S3219315  | 0.53 | 1 158-183(0.53)                                                                                                                                                                            |
| gnl UG Hs#S3601506  | 0.76 | 2 306-331(0.76) 954-979(0.20)                                                                                                                                                              |
| gnl UG Hs#S4617516  | 0.24 | 1 945-970(0.24)                                                                                                                                                                            |
| gnl UG Hs#S14802700 | 2.62 | 4 465-491(1.62) 963-989(2.62) 1601-1629(0.11) 1934-1959(1.72)                                                                                                                              |
| gnl UG Hs#S4819941  | 3.52 | 2 1431-1456(0.04) 1857-1885(3.52)                                                                                                                                                          |
| gnl UG Hs#S1730158  | 2.82 | 4 189-214(0.72) 531-558(1.87) 970-996(0.64) 1562-1588(2.82)                                                                                                                                |
| gnl UG Hs#S3987914  | 1.57 | 1 356-381(1.57)                                                                                                                                                                            |
| gnl UG Hs#S4554658  | 3.3  | 1 294-319(3.30)                                                                                                                                                                            |
| gnl UG Hs#S1971523  | 2.58 | 3 366-391(2.58) 3670-3695(0.59) 3777-3805(1.98)                                                                                                                                            |
| gnl UG Hs#S4554598  | 5.75 | 5 135-161(0.82) 198-224(0.43) 253-278(0.30) 452-479(5.75) 1171-1199(2.85)                                                                                                                  |
| gnl UG Hs#S3619119  | 1.81 | 5 67-94(0.17) 249-274(0.76) 355-383(0.66) 507-533(0.56) 1249-1274(1.81)                                                                                                                    |
| gnl UG Hs#S1730666  | 0.5  | 4 151-176(0.13) 833-858(0.24) 899-924(0.13) 1469-1494(0.50)                                                                                                                                |
| gnl UG Hs#S4045878  | 2.2  | 1 36-63(2.20)                                                                                                                                                                              |
| gnl UG Hs#S10831785 | 1.13 | 2 46-71(1.13) 186-211(0.39)                                                                                                                                                                |
| gnl UG Hs#S3601630  | 0.66 | 2 1092-1117(0.17) 1206-1234(0.66)                                                                                                                                                          |
| gnl UG Hs#S4284983  | 3.11 | 7 270-295(1.84) 310-338(0.71) 522-547(0.91) 925-950(3.11) 1005-1030(0.46) 1054-1083(3.03) 1221-1247(0.08)                                                                                  |
| gnl UG Hs#S15640297 | 3.33 | 1 681-707(3.33)                                                                                                                                                                            |
| gnl UG Hs#S2293886  | 3.11 | 4 545-570(0.11) 953-979(1.08) 1130-1155(3.11) 1300-1325(1.17)                                                                                                                              |
| gnl UG Hs#S4283232  | 1.01 | 2 94-120(0.61) 154-180(1.01)                                                                                                                                                               |
| gnl UG Hs#S4812893  | 0.81 | 1 346-374(0.81)                                                                                                                                                                            |
| gnl UG Hs#S4812824  | 4.13 | 6 609-634(1.94) 1023-1048(4.13) 1108-1133(1.63) 1325-1351(1.27) 1377-1402(1.80) 1410-1435(0.30)                                                                                            |
| gnl UG Hs#S3438883  | 1.72 | 2 296-324(0.88) 374-397(1.72)                                                                                                                                                              |
| gnl UG Hs#S3602322  | 4.13 | 8 224-250(1.57) 1738-1763(0.65) 2060-2088(0.01) 2098-2126(4.13) 3598-3624(1.01) 4378-4406(0.40) 4831-4858(0.41) 5169-5195(0.43)                                                            |
| gnl UG Hs#S3333634  | 0.72 | 1 343-368(0.72)                                                                                                                                                                            |
| gnl UG Hs#S1726780  | 1.43 | 1 115-140(1.43)                                                                                                                                                                            |
| gnl UG Hs#S2139500  | 4.72 | 4 1960-1987(1.05) 2116-2141(3.72) 2205-2230(0.20) 2265-2290(4.72)                                                                                                                          |
| gnl UG Hs#S3440083  | 2.87 | 1 274-299(2.87)                                                                                                                                                                            |
| gnl UG Hs#S5931210  | 0.79 | 1 589-614(0.79)                                                                                                                                                                            |
| gnl UG Hs#S5495215  | 4.21 | 3 647-672(1.40) 841-867(0.45) 1523-1549(4.21)                                                                                                                                              |
| gnl UG Hs#S1729186  | 1.13 | 1 631-655(1.13)                                                                                                                                                                            |
| gnl UG Hs#S1727636  | 1.3  | 3 331-356(1.30) 427-455(0.40) 904-931(0.83)                                                                                                                                                |
| gnl UG Hs#S1731614  | 1.85 | 2 240-268(1.85) 584-609(0.75)                                                                                                                                                              |
| gnl UG Hs#S11154024 | 1.98 | 1 1373-1398(1.98)                                                                                                                                                                          |
| gnl UG Hs#S2139199  | 4.21 | 12 1489-1516(0.84) 1825-1850(2.32) 1925-1951(2.89) 2491-2516(1.58) 3033-3058(4.21) 3062-3087(2.22) 3223-3249(3.04) 3525-3550(0.07) 3652-3677(0.84) 3767-3792(0.13) 4842-4868(0.98) 5366-55 |
| gnl UG Hs#S1731767  | 7.95 | 2 1146-1171(7.95) 2444-2470(1.08)                                                                                                                                                          |
| gnl UG Hs#S1728153  | 0.08 | 1 367-393(0.08)                                                                                                                                                                            |
| gnl UG Hs#S10832272 | 1.4  | 2 68-93(0.23) 694-719(1.40)                                                                                                                                                                |
| gnl UG Hs#S1731272  | 0.98 | 1 1411-1436(0.98)                                                                                                                                                                          |
| gnl UG Hs#S5860320  | 1.53 | 1 172-197(1.53)                                                                                                                                                                            |
| gnl UG Hs#S3603178  | 2.06 | 3 213-241(0.08) 327-352(2.06) 463-490(0.26)                                                                                                                                                |
| gnl UG Hs#S4435906  | 4.15 | 3 482-510(0.94) 530-555(4.15) 765-790(0.04)                                                                                                                                                |
| gnl UG Hs#S15632434 | 0.62 | 2 115-143(0.20) 641-666(0.62)                                                                                                                                                              |
| gnl UG Hs#S1726448  | 2.3  | 2 162-187(2.30) 260-287(1.40)                                                                                                                                                              |
| gnl UG Hs#S2293322  | 3.01 | 2 1074-1102(0.17) 1645-1671(3.01)                                                                                                                                                          |
| gnl UG Hs#S1824525  | 0.98 | 3 249-275(0.47) 420-445(0.98) 1000-1025(0.91)                                                                                                                                              |
| gnl UG Hs#S3547110  | 1.52 | 4 423-448(1.11) 451-479(1.52) 5297-5322(0.30) 5430-5455(1.50)                                                                                                                              |
| gnl UG Hs#S1727306  | 2.68 | 2 523-548(2.68) 979-1005(1.30)                                                                                                                                                             |
| gnl UG Hs#S1726501  | 1.89 | 1 1053-1079(1.89)                                                                                                                                                                          |

|                     |      |                                                                                                                                           |
|---------------------|------|-------------------------------------------------------------------------------------------------------------------------------------------|
| gnl UG Hs#S15638193 | 4.15 | 1 17-40(4.15)                                                                                                                             |
| gnl UG Hs#S1729626  | 0.6  | 2 352-378(0.36) 625-651(0.60)                                                                                                             |
| gnl UG Hs#S3219481  | 4.86 | 3 592-618(2.18) 706-729(0.54) 990-1016(4.86)                                                                                              |
| gnl UG Hs#S2139540  | 2.08 | 1 919-944(2.08)                                                                                                                           |
| gnl UG Hs#S3219916  | 1.04 | 5 178-203(0.50) 803-829(0.57) 1434-1460(0.72) 1931-1957(0.76) 1969-1994(1.04)                                                             |
| gnl UG Hs#S1729051  | 2.33 | 2 275-300(2.33) 659-685(0.68)                                                                                                             |
| gnl UG Hs#S4831097  | 3.2  | 2 697-725(0.88) 1111-1136(3.20)                                                                                                           |
| gnl UG Hs#S4284505  | 0.82 | 1 519-544(0.82)                                                                                                                           |
| gnl UG Hs#S6159000  | 3.4  | 1 621-648(3.40)                                                                                                                           |
| gnl UG Hs#S3219565  | 0.26 | 1 512-537(0.26)                                                                                                                           |
| gnl UG Hs#S4553696  | 1.67 | 4 54-80(1.67) 231-256(1.13) 374-399(0.81) 418-443(0.81)                                                                                   |
| gnl UG Hs#S4546041  | 0.52 | 1 444-469(0.52)                                                                                                                           |
| gnl UG Hs#S1728496  | 1.56 | 2 211-236(0.30) 465-490(1.56)                                                                                                             |
| gnl UG Hs#S3619161  | 1.88 | 1 831-855(1.88)                                                                                                                           |
| gnl UG Hs#S3603844  | 2.57 | 9 383-408(0.72) 480-506(0.23) 598-625(0.04) 858-883(1.17) 1197-1223(1.26) 1244-1269(0.40) 1417-1443(2.57) 1799-1824(0.62) 1982-2007(0.18) |
| gnl UG Hs#S4621267  | 0.27 | 1 2778-2806(0.27)                                                                                                                         |
| gnl UG Hs#S6687034  | 0.72 | 1 2067-2092(0.72)                                                                                                                         |
| gnl UG Hs#S1090500  | 0.21 | 1 909-934(0.21)                                                                                                                           |
| gnl UG Hs#S2415     | 0.14 | 1 386-411(0.14)                                                                                                                           |
| gnl UG Hs#S3940176  | 2.91 | 2 43-71(0.07) 444-471(2.91)                                                                                                               |
| gnl UG Hs#S3619342  | 2.72 | 2 554-579(2.72) 1734-1759(0.62)                                                                                                           |
| gnl UG Hs#S7111029  | 3.4  | 1 1659-1687(3.40)                                                                                                                         |
| gnl UG Hs#S10832062 | 1.72 | 4 640-665(0.20) 803-829(1.39) 940-965(0.11) 1267-1294(1.72)                                                                               |
| gnl UG Hs#S5930946  | 0.27 | 1 29-55(0.27)                                                                                                                             |
| gnl UG Hs#S1726235  | 0.91 | 1 62-87(0.91)                                                                                                                             |
| gnl UG Hs#S3438879  | 1.91 | 2 887-912(0.68) 1007-1032(1.91)                                                                                                           |
| gnl UG Hs#S3218912  | 0.02 | 1 539-566(0.02)                                                                                                                           |
| gnl UG Hs#S12743924 | 1.43 | 1 207-233(1.43)                                                                                                                           |
| gnl UG Hs#S3803271  | 0.79 | 1 751-776(0.79)                                                                                                                           |
| gnl UG Hs#S2139433  | 2.5  | 5 340-365(2.43) 667-692(0.20) 1177-1202(2.50) 1622-1650(0.71) 2308-2333(0.46)                                                             |
| gnl UG Hs#S14802388 | 1    | 1 1663-1688(1.00)                                                                                                                         |
| gnl UG Hs#S4826472  | 0.14 | 1 189-215(0.14)                                                                                                                           |
| gnl UG Hs#S3991578  | 1.12 | 2 1026-1051(0.07) 1759-1785(1.12)                                                                                                         |
| gnl UG Hs#S1726729  | 1.14 | 1 354-379(1.14)                                                                                                                           |
| gnl UG Hs#S3218942  | 1.52 | 2 428-453(1.29) 2413-2436(1.52)                                                                                                           |
| gnl UG Hs#S1728842  | 7.36 | 2 65-91(7.36) 124-152(1.62)                                                                                                               |
| gnl UG Hs#S3219842  | 5.14 | 1 178-204(5.14)                                                                                                                           |
| gnl UG Hs#S3987849  | 2.23 | 7 214-239(1.87) 527-554(0.07) 682-707(0.58) 907-933(1.65) 1012-1038(2.23) 1478-1503(1.14) 1610-1638(0.88)                                 |
| gnl UG Hs#S3602245  | 1.01 | 2 878-904(1.01) 999-1025(0.40)                                                                                                            |
| gnl UG Hs#S4820124  | 4.59 | 4 186-211(0.08) 249-275(0.43) 310-336(2.67) 680-708(4.59)                                                                                 |
| gnl UG Hs#S4554646  | 1.62 | 2 360-386(1.62) 966-991(0.91)                                                                                                             |
| gnl UG Hs#S4631234  | 0.1  | 1 762-790(0.10)                                                                                                                           |
| gnl UG Hs#S2138744  | 1.61 | 2 68-93(1.61) 584-613(0.03)                                                                                                               |
| gnl UG Hs#S2138792  | 1.84 | 1 719-744(1.84)                                                                                                                           |
| gnl UG Hs#S1731050  | 1.73 | 2 344-372(0.97) 389-417(1.73)                                                                                                             |
| gnl UG Hs#S4001853  | 0.36 | 1 1703-1728(0.36)                                                                                                                         |
| gnl UG Hs#S2139404  | 3.01 | 2 329-354(0.53) 513-539(3.01)                                                                                                             |
| gnl UG Hs#S4810944  | 0.52 | 1 556-581(0.52)                                                                                                                           |
| gnl UG Hs#S2293974  | 0.42 | 1 98-126(0.42)                                                                                                                            |
| gnl UG Hs#S3438814  | 1.08 | 2 558-584(1.08) 618-643(0.81)                                                                                                             |
| gnl UG Hs#S2294194  | 0.94 | 2 113-137(0.32) 1435-1460(0.94)                                                                                                           |
| gnl UG Hs#S1731955  | 2.4  | 5 181-208(1.66) 383-408(1.11) 958-983(1.20) 1040-1066(2.40) 1105-1130(0.28)                                                               |
| gnl UG Hs#S5978558  | 1.44 | 2 450-475(0.81) 528-556(1.44)                                                                                                             |
| gnl UG Hs#S4435921  | 0.9  | 1 615-639(0.90)                                                                                                                           |

|                     |      |                                                                                                                                                                                              |
|---------------------|------|----------------------------------------------------------------------------------------------------------------------------------------------------------------------------------------------|
| gnl UG Hs#S3355671  | 0.17 | 1 48-73(0.17)                                                                                                                                                                                |
| gnl UG Hs#S4546314  | 0.52 | 2 1123-1149(0.30) 2335-2360(0.52)                                                                                                                                                            |
| gnl UG Hs#S5860310  | 2.31 | 4 244-271(0.17) 565-591(0.01) 643-669(0.30) 1004-1029(2.31)                                                                                                                                  |
| gnl UG Hs#S2139484  | 0.37 | 1 1481-1509(0.37)                                                                                                                                                                            |
| gnl UG Hs#S4553519  | 3.27 | 18 147-173(0.23) 302-327(1.50) 559-585(1.06) 660-687(0.61) 779-804(0.50) 869-893(3.26) 1077-1102(1.72) 1239-1265(1.40) 1705-1730(3.27) 2450-2475(0.14) 2497-2523(0.97) 2802-2827(1.72) 3537- |
| gnl UG Hs#S2293776  | 0.85 | 1 152-176(0.85)                                                                                                                                                                              |
| gnl UG Hs#S4822891  | 4.26 | 9 106-131(0.04) 243-266(0.79) 449-474(1.82) 928-953(0.81) 1096-1121(2.07) 1692-1718(0.63) 1988-2013(4.26) 2517-2542(0.17) 3404-3430(0.14)                                                    |
| gnl UG Hs#S5979240  | 0.04 | 1 536-561(0.04)                                                                                                                                                                              |
| gnl UG Hs#S3619586  | 0.59 | 2 143-171(0.59) 431-456(0.04)                                                                                                                                                                |
| gnl UG Hs#S1730527  | 5.04 | 2 252-277(2.58) 568-594(5.04)                                                                                                                                                                |
| gnl UG Hs#S4807646  | 2.13 | 1 541-569(2.13)                                                                                                                                                                              |
| gnl UG Hs#S2654665  | 1.06 | 4 203-232(0.13) 258-285(0.82) 638-665(0.43) 1313-1341(1.06)                                                                                                                                  |
| gnl UG Hs#S3219999  | 0.53 | 1 450-475(0.53)                                                                                                                                                                              |
| gnl UG Hs#S3601518  | 1.46 | 1 43-68(1.46)                                                                                                                                                                                |
| gnl UG Hs#S1729920  | 2.82 | 1 124-149(2.82)                                                                                                                                                                              |
| gnl UG Hs#S3219457  | 0.2  | 1 370-395(0.20)                                                                                                                                                                              |
| gnl UG Hs#S1729480  | 1.72 | 2 276-301(1.72) 329-355(0.69)                                                                                                                                                                |
| gnl UG Hs#S11062671 | 4.49 | 4 67-94(4.49) 503-531(1.30) 633-658(0.17) 839-864(1.30)                                                                                                                                      |
| gnl UG Hs#S1824333  | 0.69 | 1 621-646(0.69)                                                                                                                                                                              |
| gnl UG Hs#S3219338  | 0.72 | 1 645-670(0.72)                                                                                                                                                                              |
| gnl UG Hs#S1728315  | 0.75 | 2 1616-1640(0.61) 2560-2585(0.75)                                                                                                                                                            |
| gnl UG Hs#S1730442  | 1.98 | 2 129-154(0.84) 237-262(1.98)                                                                                                                                                                |
| gnl UG Hs#S3543456  | 1.23 | 1 138-164(1.23)                                                                                                                                                                              |
| gnl UG Hs#S3219638  | 3.14 | 4 594-619(1.09) 1437-1462(3.14) 2307-2334(2.15) 2532-2560(0.20)                                                                                                                              |
| gnl UG Hs#S1732002  | 0.49 | 1 494-522(0.49)                                                                                                                                                                              |
| gnl UG Hs#S3439072  | 2.06 | 4 495-523(1.40) 1015-1041(0.12) 1421-1447(2.06) 1525-1550(0.14)                                                                                                                              |
| gnl UG Hs#S4823340  | 3.06 | 8 2058-2085(3.06) 2098-2124(0.66) 2686-2711(0.08) 2776-2799(3.05) 2936-2965(0.35) 3153-3178(1.01) 3531-3556(1.08) 3867-3893(0.30)                                                            |
| gnl UG Hs#S1727365  | 1.29 | 2 521-546(0.26) 851-878(1.29)                                                                                                                                                                |
| gnl UG Hs#S4813135  | 0.49 | 2 398-423(0.24) 629-655(0.49)                                                                                                                                                                |
| gnl UG Hs#S3619188  | 1.97 | 2 56-82(1.97) 1145-1170(0.89)                                                                                                                                                                |
| gnl UG Hs#S4807641  | 0.24 | 1 476-501(0.24)                                                                                                                                                                              |
| gnl UG Hs#S3437944  | 1.13 | 2 594-619(1.13) 636-661(0.17)                                                                                                                                                                |
| gnl UG Hs#S1726999  | 1.17 | 1 27-53(1.17)                                                                                                                                                                                |
| gnl UG Hs#S4616901  | 0.53 | 1 1196-1220(0.53)                                                                                                                                                                            |
| gnl UG Hs#S2139708  | 2.3  | 1 109-134(2.30)                                                                                                                                                                              |
| gnl UG Hs#S1727131  | 0.37 | 1 354-379(0.37)                                                                                                                                                                              |
| gnl UG Hs#S1731151  | 0.08 | 1 1544-1570(0.08)                                                                                                                                                                            |
| gnl UG Hs#S3219171  | 0.72 | 2 54-79(0.72) 355-380(0.15)                                                                                                                                                                  |
| gnl UG Hs#S3333515  | 0.98 | 1 310-335(0.98)                                                                                                                                                                              |
| gnl UG Hs#S1729769  | 0.25 | 1 140-166(0.25)                                                                                                                                                                              |
| gnl UG Hs#S3219034  | 4.95 | 2 12-37(1.04) 673-698(4.95)                                                                                                                                                                  |
| gnl UG Hs#S1731984  | 2.17 | 3 471-495(2.17) 556-582(1.53) 1776-1802(1.76)                                                                                                                                                |
| gnl UG Hs#S1728865  | 0.5  | 1 1797-1822(0.50)                                                                                                                                                                            |
| gnl UG Hs#S1731995  | 1.3  | 3 28-55(0.14) 568-594(1.30) 760-785(0.07)                                                                                                                                                    |
| gnl UG Hs#S1732300  | 1.71 | 2 870-898(1.71) 1314-1342(0.40)                                                                                                                                                              |
| gnl UG Hs#S2139058  | 2.72 | 6 35-60(2.36) 257-284(2.72) 726-753(0.81) 1731-1756(0.17) 2342-2367(0.58) 2791-2819(1.03)                                                                                                    |
| gnl UG Hs#S1726300  | 4.04 | 1 987-1012(4.04)                                                                                                                                                                             |
| gnl UG Hs#S4807707  | 0.9  | 2 305-330(0.17) 762-786(0.90)                                                                                                                                                                |
| gnl UG Hs#S3438544  | 6.25 | 1 164-190(6.25)                                                                                                                                                                              |
| gnl UG Hs#S3439062  | 2.07 | 4 233-258(2.07) 724-749(0.68) 790-816(1.14) 1100-1125(0.88)                                                                                                                                  |
| gnl UG Hs#S5978549  | 3.23 | 9 196-221(0.17) 2067-2092(0.33) 2170-2197(1.81) 2210-2236(0.72) 2257-2282(3.23) 3066-3091(1.51) 3787-3812(0.07) 4144-4169(0.19) 4945-4971(1.82)                                              |
| gnl UG Hs#S2293370  | 2.57 | 1 335-360(2.57)                                                                                                                                                                              |
| gnl UG Hs#S2140111  | 0.71 | 1 408-434(0.71)                                                                                                                                                                              |
| gnl UG Hs#S1730831  | 4.62 | 1 470-495(4.62)                                                                                                                                                                              |

|                     |      |                                                                                                                                                           |
|---------------------|------|-----------------------------------------------------------------------------------------------------------------------------------------------------------|
| gnl UG Hs#S3619738  | 1.62 | 1 1278-1306(1.62)                                                                                                                                         |
| gnl UG Hs#S2293641  | 0.56 | 1 490-515(0.56)                                                                                                                                           |
| gnl UG Hs#S4814222  | 0.08 | 1 224-250(0.08)                                                                                                                                           |
| gnl UG Hs#S2140118  | 0.5  | 1 402-428(0.50)                                                                                                                                           |
| gnl UG Hs#S4284771  | 2.33 | 6 337-363(0.30) 413-438(1.04) 636-662(1.93) 678-706(0.23) 755-781(2.33) 876-901(0.04)                                                                     |
| gnl UG Hs#S1729450  | 4.01 | 3 275-299(3.69) 366-392(2.08) 407-432(4.01)                                                                                                               |
| gnl UG Hs#S15636431 | 1.13 | 2 260-285(1.13) 1696-1722(0.82)                                                                                                                           |
| gnl UG Hs#S1728866  | 2.72 | 10 82-105(1.39) 181-206(1.82) 250-275(1.50) 284-312(2.21) 1027-1052(2.72) 1783-1809(1.04) 2234-2258(0.42) 2837-2862(0.20) 2915-2940(2.00) 3183-3208(0.57) |
| gnl UG Hs#S1728490  | 2.79 | 2 374-400(2.79) 2594-2619(0.36)                                                                                                                           |
| gnl UG Hs#S3619247  | 1.41 | 2 248-273(1.41) 1003-1029(1.23)                                                                                                                           |
| gnl UG Hs#S15642160 | 1.94 | 1 154-180(1.94)                                                                                                                                           |
| gnl UG Hs#S15642323 | 0.76 | 1 477-503(0.76)                                                                                                                                           |
| gnl UG Hs#S1727450  | 0.03 | 1 1251-1277(0.03)                                                                                                                                         |
| gnl UG Hs#S1731415  | 1.51 | 3 172-198(1.43) 365-393(1.51) 720-745(0.58)                                                                                                               |
| gnl UG Hs#S4283810  | 0.79 | 1 2096-2126(0.79)                                                                                                                                         |
| gnl UG Hs#S3322147  | 1.01 | 1 1-27(1.01)                                                                                                                                              |
| gnl UG Hs#S1730119  | 0.98 | 3 308-334(0.65) 393-418(0.17) 912-937(0.98)                                                                                                               |
| gnl UG Hs#S1727274  | 0.45 | 1 253-281(0.45)                                                                                                                                           |
| gnl UG Hs#S3355556  | 3.65 | 1 1813-1838(3.65)                                                                                                                                         |
| gnl UG Hs#S4807870  | 2.75 | 5 8-33(0.82) 207-232(0.78) 906-931(2.75) 1430-1456(0.97) 1487-1515(2.36)                                                                                  |
| gnl UG Hs#S2138824  | 4    | 1 83-108(4.00)                                                                                                                                            |
| gnl UG Hs#S4553246  | 3.04 | 2 864-890(3.04) 1196-1223(1.02)                                                                                                                           |
| gnl UG Hs#S3438833  | 2.23 | 1 17-45(2.23)                                                                                                                                             |
| gnl UG Hs#S4819888  | 1.85 | 2 2152-2177(1.85) 2182-2207(0.08)                                                                                                                         |
| gnl UG Hs#S3219062  | 0.57 | 1 673-698(0.57)                                                                                                                                           |
| gnl UG Hs#S1731104  | 5.14 | 5 422-447(3.04) 563-588(5.14) 1194-1222(1.20) 1439-1465(1.21) 1702-1727(0.57)                                                                             |
| gnl UG Hs#S3438994  | 5.2  | 3 548-573(5.20) 585-612(0.76) 999-1025(0.97)                                                                                                              |
| gnl UG Hs#S4807830  | 0.26 | 2 145-170(0.14) 659-682(0.26)                                                                                                                             |
| gnl UG Hs#S1729978  | 0.17 | 1 499-525(0.17)                                                                                                                                           |
| gnl UG Hs#S1729705  | 1.33 | 1 917-943(1.33)                                                                                                                                           |
| gnl UG Hs#S4820767  | 3.21 | 3 675-700(1.72) 1827-1852(0.72) 2258-2283(3.21)                                                                                                           |
| gnl UG Hs#S3619150  | 1.79 | 2 748-773(1.79) 1235-1260(0.17)                                                                                                                           |
| gnl UG Hs#S2293785  | 1.3  | 2 70-96(1.30) 121-150(0.66)                                                                                                                               |
| gnl UG Hs#S2139521  | 1.75 | 4 1339-1364(0.14) 1458-1486(1.75) 1587-1613(0.07) 2160-2186(0.79)                                                                                         |
| gnl UG Hs#S2138991  | 0.04 | 1 144-169(0.04)                                                                                                                                           |
| gnl UG Hs#S1726572  | 1.82 | 2 246-271(1.82) 599-624(1.06)                                                                                                                             |
| gnl UG Hs#S2293232  | 1.08 | 2 162-187(0.02) 353-379(1.08)                                                                                                                             |
| gnl UG Hs#S1730907  | 0.05 | 1 540-565(0.05)                                                                                                                                           |
| gnl UG Hs#S1728715  | 1.63 | 1 521-546(1.63)                                                                                                                                           |
| gnl UG Hs#S3219564  | 1.47 | 2 349-374(1.47) 643-668(0.50)                                                                                                                             |
| gnl UG Hs#S4553438  | 2.73 | 3 395-422(2.73) 456-482(0.23) 1599-1624(1.56)                                                                                                             |
| gnl UG Hs#S1969080  | 0.55 | 1 712-737(0.55)                                                                                                                                           |
| gnl UG Hs#S4807648  | 4.4  | 2 680-708(4.40) 826-854(0.68)                                                                                                                             |
| gnl UG Hs#S3333473  | 5.14 | 1 564-590(5.14)                                                                                                                                           |
| gnl UG Hs#S2294624  | 0.3  | 1 592-618(0.30)                                                                                                                                           |
| gnl UG Hs#S11046664 | 4.82 | 3 776-802(0.30) 2278-2304(1.30) 2311-2337(4.82)                                                                                                           |
| gnl UG Hs#S11062795 | 0.51 | 1 484-510(0.51)                                                                                                                                           |
| gnl UG Hs#S1728145  | 4.5  | 1 1397-1423(4.50)                                                                                                                                         |
| gnl UG Hs#S5978503  | 0.51 | 2 603-628(0.04) 678-704(0.51)                                                                                                                             |
| gnl UG Hs#S15636699 | 0.98 | 1 673-698(0.98)                                                                                                                                           |
| gnl UG Hs#S4820054  | 2.88 | 2 359-384(0.40) 1038-1066(2.88)                                                                                                                           |
| gnl UG Hs#S1729944  | 3.17 | 1 1150-1175(3.17)                                                                                                                                         |
| gnl UG Hs#S3438882  | 2.17 | 1 855-880(2.17)                                                                                                                                           |
| gnl UG Hs#S7089811  | 1.58 | 1 120-145(1.58)                                                                                                                                           |

|                     |      |                                                                                                                             |
|---------------------|------|-----------------------------------------------------------------------------------------------------------------------------|
| gnl UG Hs#S4819743  | 0.98 | 2 282-308(0.98) 553-578(0.04)                                                                                               |
| gnl UG Hs#S2140384  | 1.5  | 3 1768-1793(1.04) 2610-2636(1.50) 2664-2692(0.42)                                                                           |
| gnl UG Hs#S1730168  | 1.08 | 3 68-93(0.21) 648-676(1.08) 1018-1044(0.69)                                                                                 |
| gnl UG Hs#S4809574  | 3.26 | 1 3248-3273(3.26)                                                                                                           |
| gnl UG Hs#S14272915 | 1.07 | 1 3372-3397(1.07)                                                                                                           |
| gnl UG Hs#S4545928  | 3.49 | 4 347-375(3.49) 525-552(0.17) 746-771(1.65) 940-966(0.27)                                                                   |
| gnl UG Hs#S2293959  | 0.98 | 1 284-310(0.98)                                                                                                             |
| gnl UG Hs#S3218933  | 0.52 | 1 105-129(0.52)                                                                                                             |
| gnl UG Hs#S1730974  | 2.75 | 1 105-130(2.75)                                                                                                             |
| gnl UG Hs#S4045885  | 0.08 | 1 767-792(0.08)                                                                                                             |
| gnl UG Hs#S1969121  | 1.46 | 2 1247-1274(1.46) 2123-2151(0.23)                                                                                           |
| gnl UG Hs#S1732193  | 3.62 | 2 901-926(3.62) 940-966(0.69)                                                                                               |
| gnl UG Hs#S4819108  | 1.67 | 1 559-585(1.67)                                                                                                             |
| gnl UG Hs#S1727061  | 0.49 | 1 3111-3139(0.49)                                                                                                           |
| gnl UG Hs#S3438891  | 0.47 | 1 88-113(0.47)                                                                                                              |
| gnl UG Hs#S2140082  | 2.82 | 4 11-39(0.66) 179-204(0.04) 562-587(1.72) 958-984(2.82)                                                                     |
| gnl UG Hs#S11590999 | 0.81 | 1 720-745(0.81)                                                                                                             |
| gnl UG Hs#S1726238  | 2.57 | 2 21-46(2.57) 709-732(0.57)                                                                                                 |
| gnl UG Hs#S4812207  | 3.94 | 1 140-165(3.94)                                                                                                             |
| gnl UG Hs#S2138776  | 2.4  | 2 119-143(0.05) 658-683(2.40)                                                                                               |
| gnl UG Hs#S4554649  | 0.82 | 2 81-106(0.82) 672-698(0.04)                                                                                                |
| gnl UG Hs#S4822050  | 1.71 | 1 243-270(1.71)                                                                                                             |
| gnl UG Hs#S2293984  | 0.93 | 2 133-159(0.93) 275-300(0.65)                                                                                               |
| gnl UG Hs#S2293612  | 2.04 | 3 513-540(1.96) 768-794(2.04) 1038-1064(1.66)                                                                               |
| gnl UG Hs#S2140257  | 4.37 | 3 17-43(0.84) 869-892(1.62) 1381-1406(4.37)                                                                                 |
| gnl UG Hs#S1726798  | 0.87 | 2 684-706(0.03) 787-813(0.87)                                                                                               |
| gnl UG Hs#S2293682  | 5.16 | 2 354-380(0.36) 491-516(5.16)                                                                                               |
| gnl UG Hs#S1726391  | 0.3  | 1 660-686(0.30)                                                                                                             |
| gnl UG Hs#S1726936  | 0.07 | 1 620-648(0.07)                                                                                                             |
| gnl UG Hs#S4807625  | 0.5  | 1 218-246(0.50)                                                                                                             |
| gnl UG Hs#S3219091  | 3.11 | 1 438-463(3.11)                                                                                                             |
| gnl UG Hs#S1728339  | 3.69 | 2 1042-1067(1.46) 1088-1111(3.69)                                                                                           |
| gnl UG Hs#S15644201 | 0.72 | 1 54-79(0.72)                                                                                                               |
| gnl UG Hs#S2293623  | 0.92 | 1 244-271(0.92)                                                                                                             |
| gnl UG Hs#S7111777  | 1.37 | 1 34-57(1.37)                                                                                                               |
| gnl UG Hs#S4823523  | 4.9  | 8 113-139(1.55) 758-786(1.55) 966-991(4.90) 1391-1416(0.79) 1887-1912(0.41) 2217-2242(2.00) 2283-2309(0.01) 2357-2383(3.04) |
| gnl UG Hs#S1727228  | 0.38 | 1 65-90(0.38)                                                                                                               |
| gnl UG Hs#S3940106  | 2.9  | 2 169-194(0.07) 879-905(2.90)                                                                                               |
| gnl UG Hs#S1727291  | 2.04 | 2 772-795(2.04) 1615-1640(0.34)                                                                                             |
| gnl UG Hs#S15638203 | 5.12 | 2 72-98(1.01) 721-747(5.12)                                                                                                 |
| gnl UG Hs#S1824313  | 2.94 | 1 998-1023(2.94)                                                                                                            |
| gnl UG Hs#S2649451  | 1.14 | 1 3235-3260(1.14)                                                                                                           |
| gnl UG Hs#S14813043 | 4.94 | 1 102-127(4.94)                                                                                                             |
| gnl UG Hs#S15644608 | 1.76 | 3 488-513(0.72) 760-786(1.76) 1515-1541(0.69)                                                                               |
| gnl UG Hs#S1729757  | 0.13 | 1 89-114(0.13)                                                                                                              |
| gnl UG Hs#S3817908  | 0.97 | 1 285-313(0.97)                                                                                                             |
| gnl UG Hs#S3219160  | 1.91 | 2 1082-1107(0.48) 2126-2152(1.91)                                                                                           |
| gnl UG Hs#S3993526  | 0.25 | 2 186-212(0.24) 876-899(0.25)                                                                                               |
| gnl UG Hs#S15642933 | 1.81 | 3 882-907(1.20) 1119-1144(1.81) 1531-1559(0.59)                                                                             |
| gnl UG Hs#S4545940  | 0.26 | 1 933-958(0.26)                                                                                                             |
| gnl UG Hs#S1726760  | 1.3  | 3 892-917(0.81) 2267-2295(0.94) 2932-2955(1.30)                                                                             |
| gnl UG Hs#S15643632 | 0.65 | 1 120-145(0.65)                                                                                                             |
| gnl UG Hs#S1728187  | 1.76 | 1 227-253(1.76)                                                                                                             |
| gnl UG Hs#S3438383  | 0.9  | 2 542-568(0.62) 741-769(0.90)                                                                                               |

|                     |      |   |                                                                                                                           |
|---------------------|------|---|---------------------------------------------------------------------------------------------------------------------------|
| gnl UG Hs#S4825852  | 2.29 | 6 | 373-398(0.57) 604-630(1.98) 892-917(2.29) 2068-2093(0.13) 3188-3213(0.76) 3240-3266(0.69)                                 |
| gnl UG Hs#S1731138  | 2.57 | 3 | 256-282(1.86) 300-328(0.30) 573-598(2.57)                                                                                 |
| gnl UG Hs#S3438485  | 1.87 | 1 | 690-715(1.87)                                                                                                             |
| gnl UG Hs#S3437923  | 2.98 | 4 | 543-568(2.98) 581-606(1.26) 1000-1025(2.30) 1186-1210(0.77)                                                               |
| gnl UG Hs#S14812544 | 2.94 | 3 | 28-53(2.94) 477-502(0.48) 619-644(1.26)                                                                                   |
| gnl UG Hs#S3601553  | 3.56 | 4 | 366-391(0.08) 395-421(3.56) 439-466(0.84) 505-530(1.04)                                                                   |
| gnl UG Hs#S2140349  | 1.41 | 1 | 140-165(1.41)                                                                                                             |
| gnl UG Hs#S11154089 | 3.07 | 3 | 323-349(1.82) 714-742(0.06) 925-950(3.07)                                                                                 |
| gnl UG Hs#S2139383  | 1.26 | 5 | 117-142(0.04) 194-219(0.85) 777-802(0.46) 931-956(1.26) 1259-1284(0.43)                                                   |
| gnl UG Hs#S1727023  | 0.91 | 1 | 95-120(0.91)                                                                                                              |
| gnl UG Hs#S3993854  | 2.85 | 1 | 271-296(2.85)                                                                                                             |
| gnl UG Hs#S2140191  | 0.55 | 1 | 451-475(0.55)                                                                                                             |
| gnl UG Hs#S1731786  | 0.68 | 2 | 127-152(0.40) 243-268(0.68)                                                                                               |
| gnl UG Hs#S3988651  | 1.34 | 1 | 974-999(1.34)                                                                                                             |
| gnl UG Hs#S5978644  | 4.85 | 1 | 306-331(4.85)                                                                                                             |
| gnl UG Hs#S1728030  | 0.64 | 1 | 228-253(0.64)                                                                                                             |
| gnl UG Hs#S1726375  | 4.2  | 8 | 363-389(1.17) 392-419(1.17) 421-446(1.49) 796-821(0.30) 1420-1445(1.23) 1773-1798(0.14) 1814-1839(0.48) 1840-1866(4.20)   |
| gnl UG Hs#S1729027  | 1.22 | 3 | 477-504(0.24) 861-886(1.22) 1406-1431(0.48)                                                                               |
| gnl UG Hs#S1728988  | 4.62 | 6 | 376-402(1.72) 487-513(1.27) 567-594(1.02) 710-735(0.13) 1044-1069(4.62) 1150-1175(1.21)                                   |
| gnl UG Hs#S5860335  | 3.08 | 2 | 398-421(0.58) 489-515(3.08)                                                                                               |
| gnl UG Hs#S4807575  | 3.4  | 4 | 483-508(2.72) 547-572(0.33) 575-601(0.59) 825-848(3.40)                                                                   |
| gnl UG Hs#S3619288  | 1.32 | 2 | 1485-1511(0.68) 1617-1642(1.32)                                                                                           |
| gnl UG Hs#S1730380  | 1.41 | 2 | 35-60(0.72) 237-262(1.41)                                                                                                 |
| gnl UG Hs#S2138681  | 0.46 | 1 | 868-893(0.46)                                                                                                             |
| gnl UG Hs#S1731116  | 0.08 | 1 | 94-119(0.08)                                                                                                              |
| gnl UG Hs#S1726716  | 2.81 | 7 | 132-158(0.68) 436-462(0.82) 527-553(2.81) 653-678(2.50) 754-779(0.57) 987-1015(1.15) 1136-1161(0.82)                      |
| gnl UG Hs#S3219309  | 1.91 | 1 | 155-181(1.91)                                                                                                             |
| gnl UG Hs#S1732235  | 1.3  | 1 | 1071-1097(1.30)                                                                                                           |
| gnl UG Hs#S4435286  | 1.68 | 2 | 418-444(1.68) 716-742(1.53)                                                                                               |
| gnl UG Hs#S4807926  | 2.2  | 2 | 1470-1498(0.00) 1502-1529(2.20)                                                                                           |
| gnl UG Hs#S2139623  | 1.94 | 3 | 238-263(1.17) 1213-1237(1.94) 2125-2150(1.19)                                                                             |
| gnl UG Hs#S2138679  | 2.21 | 1 | 83-106(2.21)                                                                                                              |
| gnl UG Hs#S10831955 | 0.17 | 1 | 1591-1617(0.17)                                                                                                           |
| gnl UG Hs#S3601548  | 3.62 | 1 | 1386-1409(3.62)                                                                                                           |
| gnl UG Hs#S4820394  | 2.14 | 2 | 608-635(2.14) 953-978(1.08)                                                                                               |
| gnl UG Hs#S3438572  | 2.56 | 2 | 54-83(2.56) 653-676(0.52)                                                                                                 |
| gnl UG Hs#S15636963 | 1.3  | 6 | 624-649(0.94) 1023-1049(0.36) 2084-2109(1.30) 2433-2459(0.72) 2492-2517(1.22) 2695-2721(0.20)                             |
| gnl UG Hs#S4818318  | 0.5  | 1 | 795-820(0.50)                                                                                                             |
| gnl UG Hs#S2294323  | 1.07 | 3 | 334-359(1.07) 594-622(0.40) 689-714(0.24)                                                                                 |
| gnl UG Hs#S1728803  | 0.34 | 1 | 319-347(0.34)                                                                                                             |
| gnl UG Hs#S5978431  | 4.02 | 1 | 757-784(4.02)                                                                                                             |
| gnl UG Hs#S1730263  | 0.8  | 1 | 2619-2642(0.80)                                                                                                           |
| gnl UG Hs#S1727714  | 0.5  | 1 | 171-199(0.50)                                                                                                             |
| gnl UG Hs#S2655921  | 0.95 | 2 | 491-519(0.08) 562-588(0.95)                                                                                               |
| gnl UG Hs#S2139360  | 4.1  | 1 | 273-297(4.10)                                                                                                             |
| gnl UG Hs#S1731613  | 2.62 | 2 | 8-33(1.25) 417-443(2.62)                                                                                                  |
| gnl UG Hs#S4553477  | 0.4  | 1 | 117-142(0.40)                                                                                                             |
| gnl UG Hs#S3219366  | 3.3  | 8 | 153-177(0.84) 301-327(0.88) 819-845(2.58) 1106-1131(2.40) 1348-1373(3.30) 1568-1595(2.72) 1889-1914(0.07) 2343-2368(0.79) |
| gnl UG Hs#S1732422  | 1.89 | 4 | 3-29(1.89) 370-396(0.47) 772-797(0.43) 1040-1065(0.89)                                                                    |
| gnl UG Hs#S4819949  | 0.08 | 1 | 219-245(0.08)                                                                                                             |
| gnl UG Hs#S4553496  | 3.72 | 5 | 1809-1834(0.72) 1865-1890(0.72) 2352-2377(0.47) 2815-2841(3.72) 5025-5051(0.44)                                           |
| gnl UG Hs#S1726625  | 3.3  | 1 | 272-297(3.30)                                                                                                             |
| gnl UG Hs#S1730215  | 1.39 | 1 | 154-179(1.39)                                                                                                             |
| gnl UG Hs#S11590882 | 0.23 | 1 | 896-924(0.23)                                                                                                             |



|                     |      |   |                                                                                                                               |
|---------------------|------|---|-------------------------------------------------------------------------------------------------------------------------------|
| gnl UG Hs#S1731466  | 1.53 | 1 | 30-55(1.53)                                                                                                                   |
| gnl UG Hs#S4811423  | 1.53 | 6 | 163-192(0.64) 530-555(0.30) 1430-1455(1.53) 1663-1688(0.82) 1930-1955(0.72) 2267-2293(0.36)                                   |
| gnl UG Hs#S4828571  | 0.12 | 1 | 1706-1732(0.12)                                                                                                               |
| gnl UG Hs#S15638935 | 2.43 | 3 | 694-719(0.33) 970-995(2.43) 1497-1522(1.30)                                                                                   |
| gnl UG Hs#S15634363 | 0.07 | 1 | 310-338(0.07)                                                                                                                 |
| gnl UG Hs#S1731217  | 0.33 | 1 | 2334-2360(0.33)                                                                                                               |
| gnl UG Hs#S2293393  | 0.17 | 1 | 637-662(0.17)                                                                                                                 |
| gnl UG Hs#S5978592  | 2.04 | 2 | 837-863(2.04) 1668-1693(0.78)                                                                                                 |
| gnl UG Hs#S11046536 | 2    | 1 | 110-135(2.00)                                                                                                                 |
| gnl UG Hs#S4612991  | 1.34 | 2 | 844-869(0.24) 994-1019(1.34)                                                                                                  |
| gnl UG Hs#S3601647  | 3.82 | 7 | 381-407(3.82) 780-805(1.24) 835-860(0.98) 956-981(0.62) 1025-1050(1.07) 997-1022(0.02) 1223-1249(0.69)                        |
| gnl UG Hs#S11062827 | 2.65 | 4 | 425-453(1.72) 462-490(1.71) 649-675(1.17) 847-874(2.65)                                                                       |
| gnl UG Hs#S1971354  | 0.59 | 1 | 1172-1197(0.59)                                                                                                               |
| gnl UG Hs#S3219056  | 2.61 | 1 | 164-189(2.61)                                                                                                                 |
| gnl UG Hs#S3602293  | 0.13 | 1 | 1063-1088(0.13)                                                                                                               |
| gnl UG Hs#S3438934  | 1.91 | 1 | 316-341(1.91)                                                                                                                 |
| gnl UG Hs#S4614064  | 0.4  | 1 | 593-619(0.40)                                                                                                                 |
| gnl UG Hs#S7111006  | 4.04 | 3 | 172-197(4.04) 229-254(0.26) 326-351(2.30)                                                                                     |
| gnl UG Hs#S1728974  | 3.06 | 3 | 390-415(3.06) 425-452(0.61) 960-985(0.40)                                                                                     |
| gnl UG Hs#S2138965  | 3.69 | 1 | 1454-1479(3.69)                                                                                                               |
| gnl UG Hs#S3438421  | 2.17 | 1 | 747-772(2.17)                                                                                                                 |
| gnl UG Hs#S4807615  | 2.15 | 3 | 217-246(1.46) 1095-1120(0.23) 1402-1425(2.15)                                                                                 |
| gnl UG Hs#S2293538  | 2.5  | 1 | 88-113(2.50)                                                                                                                  |
| gnl UG Hs#S3814700  | 2.3  | 7 | 127-152(0.72) 1061-1087(0.52) 1270-1300(1.30) 1350-1374(1.29) 1659-1687(2.30) 2264-2289(0.85) 2293-2321(1.66)                 |
| gnl UG Hs#S4613662  | 3.85 | 1 | 9-34(3.85)                                                                                                                    |
| gnl UG Hs#S4435547  | 1.91 | 5 | 225-248(0.11) 960-985(1.91) 1367-1393(0.30) 1806-1834(1.55) 2131-2156(1.21)                                                   |
| gnl UG Hs#S4554581  | 2.98 | 2 | 206-234(2.98) 826-851(1.62)                                                                                                   |
| gnl UG Hs#S3219277  | 5.04 | 6 | 266-291(2.47) 2015-2040(2.20) 2130-2155(1.65) 2342-2368(3.62) 2378-2403(0.48) 2430-2455(5.04)                                 |
| gnl UG Hs#S15644496 | 0.72 | 3 | 261-289(0.72) 857-885(0.36) 1354-1379(0.30)                                                                                   |
| gnl UG Hs#S1729209  | 2.94 | 2 | 145-173(2.94) 209-235(0.82)                                                                                                   |
| gnl UG Hs#S15639566 | 0.98 | 1 | 833-858(0.98)                                                                                                                 |
| gnl UG Hs#S5978679  | 0.85 | 1 | 325-350(0.85)                                                                                                                 |
| gnl UG Hs#S1727572  | 2.08 | 2 | 84-110(2.08) 638-663(1.30)                                                                                                    |
| gnl UG Hs#S4825636  | 1.03 | 2 | 1355-1380(1.03) 2355-2381(0.15)                                                                                               |
| gnl UG Hs#S1729390  | 3.62 | 1 | 221-246(3.62)                                                                                                                 |
| gnl UG Hs#S4821937  | 1.3  | 1 | 392-417(1.30)                                                                                                                 |
| gnl UG Hs#S1730995  | 1.04 | 2 | 333-358(0.56) 427-452(1.04)                                                                                                   |
| gnl UG Hs#S10831914 | 0.68 | 1 | 115-139(0.68)                                                                                                                 |
| gnl UG Hs#S3547232  | 2.88 | 3 | 105-132(1.07) 314-342(2.88) 443-468(0.84)                                                                                     |
| gnl UG Hs#S1729366  | 3.89 | 1 | 896-921(3.89)                                                                                                                 |
| gnl UG Hs#S3219817  | 1.72 | 2 | 383-408(1.13) 574-599(1.72)                                                                                                   |
| gnl UG Hs#S3814582  | 1.08 | 2 | 79-105(0.91) 429-454(1.08)                                                                                                    |
| gnl UG Hs#S2294233  | 2.04 | 1 | 80-106(2.04)                                                                                                                  |
| gnl UG Hs#S1726669  | 0.75 | 1 | 80-103(0.75)                                                                                                                  |
| gnl UG Hs#S11046600 | 2.13 | 6 | 1939-1967(0.07) 2869-2894(1.26) 3016-3041(0.11) 3154-3180(0.50) 3594-3619(2.13) 3620-3645(0.72)                               |
| gnl UG Hs#S1726481  | 0.7  | 1 | 194-217(0.70)                                                                                                                 |
| gnl UG Hs#S4810430  | 0.84 | 1 | 184-210(0.84)                                                                                                                 |
| gnl UG Hs#S4807714  | 1.98 | 1 | 247-272(1.98)                                                                                                                 |
| gnl UG Hs#S1729538  | 0.67 | 2 | 902-930(0.23) 1826-1853(0.67)                                                                                                 |
| gnl UG Hs#S3601719  | 5.62 | 2 | 201-227(5.62) 649-674(0.72)                                                                                                   |
| gnl UG Hs#S11046691 | 2.07 | 3 | 27-52(0.23) 511-539(1.36) 704-729(2.07)                                                                                       |
| gnl UG Hs#S3990036  | 0.81 | 1 | 591-619(0.81)                                                                                                                 |
| gnl UG Hs#S1731002  | 2.75 | 9 | 56-80(0.85) 120-143(0.17) 368-393(1.89) 459-485(0.89) 545-570(0.36) 639-664(0.62) 819-844(0.52) 946-971(2.75) 1086-1112(1.18) |
| gnl UG Hs#S2293840  | 1.14 | 1 | 851-878(1.14)                                                                                                                 |

|                     |      |   |                                                                                                                       |
|---------------------|------|---|-----------------------------------------------------------------------------------------------------------------------|
| gnl UG Hs#S4807824  | 0.86 | 1 | 311-337(0.86)                                                                                                         |
| gnl UG Hs#S2140418  | 2.87 | 6 | 159-186(2.72) 543-568(2.87) 1031-1056(0.43) 1376-1401(0.68) 1429-1455(2.08) 1536-1564(0.23)                           |
| gnl UG Hs#S2139422  | 2.14 | 1 | 128-154(2.14)                                                                                                         |
| gnl UG Hs#S4046073  | 2.04 | 1 | 754-782(2.04)                                                                                                         |
| gnl UG Hs#S1732097  | 1.97 | 4 | 65-92(1.56) 306-331(0.62) 547-574(1.19) 576-601(1.97)                                                                 |
| gnl UG Hs#S1730055  | 1.98 | 2 | 754-779(0.53) 1665-1690(1.98)                                                                                         |
| gnl UG Hs#S3220224  | 0.15 | 1 | 1563-1589(0.15)                                                                                                       |
| gnl UG Hs#S5978952  | 0.79 | 2 | 1679-1704(0.79) 1740-1769(0.07)                                                                                       |
| gnl UG Hs#S2293541  | 0.04 | 1 | 1334-1360(0.04)                                                                                                       |
| gnl UG Hs#S3439032  | 0.62 | 1 | 471-496(0.62)                                                                                                         |
| gnl UG Hs#S1727606  | 1.47 | 2 | 116-141(1.47) 572-597(0.17)                                                                                           |
| gnl UG Hs#S1727802  | 0.36 | 1 | 304-332(0.36)                                                                                                         |
| gnl UG Hs#S1732365  | 2.49 | 4 | 4-29(1.79) 355-380(1.79) 810-833(2.49) 873-898(0.18)                                                                  |
| gnl UG Hs#S3438671  | 1.5  | 3 | 385-411(0.82) 649-675(1.50) 766-791(0.18)                                                                             |
| gnl UG Hs#S1730182  | 1.82 | 5 | 214-239(1.13) 240-265(1.82) 2458-2484(0.14) 3965-3990(0.53) 5236-5261(0.75)                                           |
| gnl UG Hs#S1824268  | 2.21 | 1 | 246-272(2.21)                                                                                                         |
| gnl UG Hs#S2294465  | 1.53 | 1 | 1891-1916(1.53)                                                                                                       |
| gnl UG Hs#S1728474  | 3.08 | 1 | 2808-2833(3.08)                                                                                                       |
| gnl UG Hs#S1728124  | 1.34 | 2 | 519-545(1.30) 572-598(1.34)                                                                                           |
| gnl UG Hs#S1727174  | 1.01 | 1 | 181-207(1.01)                                                                                                         |
| gnl UG Hs#S2140330  | 1.97 | 1 | 726-754(1.97)                                                                                                         |
| gnl UG Hs#S998775   | 1.81 | 1 | 176-204(1.81)                                                                                                         |
| gnl UG Hs#S15846863 | 2.01 | 2 | 721-748(0.10) 835-859(2.01)                                                                                           |
| gnl UG Hs#S4826145  | 2.3  | 4 | 163-188(1.53) 303-333(1.39) 785-810(2.30) 1576-1601(0.91)                                                             |
| gnl UG Hs#S3438960  | 0.72 | 1 | 731-758(0.72)                                                                                                         |
| gnl UG Hs#S4546141  | 3.91 | 1 | 567-594(3.91)                                                                                                         |
| gnl UG Hs#S3218896  | 0.91 | 3 | 192-218(0.91) 581-606(0.50) 895-920(0.62)                                                                             |
| gnl UG Hs#S2139284  | 0.98 | 1 | 83-108(0.98)                                                                                                          |
| gnl UG Hs#S7111716  | 2.07 | 5 | 53-78(0.56) 1140-1165(0.17) 1381-1406(1.53) 2246-2271(1.13) 2379-2404(2.07)                                           |
| gnl UG Hs#S2139429  | 2.84 | 1 | 328-353(2.84)                                                                                                         |
| gnl UG Hs#S2139689  | 1.2  | 1 | 2173-2198(1.20)                                                                                                       |
| gnl UG Hs#S1971526  | 3.59 | 3 | 407-430(3.59) 474-499(2.31) 671-696(0.79)                                                                             |
| gnl UG Hs#S1731755  | 3.52 | 3 | 43-68(2.04) 286-311(3.52) 531-556(0.33)                                                                               |
| gnl UG Hs#S1729934  | 0.14 | 1 | 885-910(0.14)                                                                                                         |
| gnl UG Hs#S3803608  | 1.36 | 2 | 104-129(1.36) 432-460(0.07)                                                                                           |
| gnl UG Hs#S2140606  | 3.39 | 4 | 1158-1183(0.16) 1558-1586(3.39) 1877-1902(1.79) 2161-2187(1.76)                                                       |
| gnl UG Hs#S4554588  | 1.32 | 3 | 474-499(0.23) 713-739(1.32) 829-854(0.11)                                                                             |
| gnl UG Hs#S15634981 | 2.26 | 4 | 1726-1751(0.55) 2127-2153(1.23) 4321-4346(0.46) 4591-4616(2.26)                                                       |
| gnl UG Hs#S4811866  | 3.63 | 1 | 1268-1293(3.63)                                                                                                       |
| gnl UG Hs#S1727445  | 0.13 | 1 | 1072-1097(0.13)                                                                                                       |
| gnl UG Hs#S1726987  | 2.79 | 8 | 160-187(0.45) 413-439(1.11) 595-620(2.79) 872-900(0.30) 908-936(1.88) 1090-1118(0.23) 1174-1199(0.26) 1385-1410(1.07) |
| gnl UG Hs#S2293555  | 0.55 | 3 | 748-773(0.55) 880-908(0.42) 1151-1179(0.49)                                                                           |
| gnl UG Hs#S2293205  | 0.36 | 1 | 427-452(0.36)                                                                                                         |
| gnl UG Hs#S1730077  | 0.07 | 1 | 95-120(0.07)                                                                                                          |
| gnl UG Hs#S1731519  | 1.17 | 1 | 1647-1672(1.17)                                                                                                       |
| gnl UG Hs#S1729222  | 2.57 | 3 | 73-98(0.58) 351-377(0.23) 584-609(2.57)                                                                               |
| gnl UG Hs#S4631002  | 3.99 | 3 | 250-276(3.99) 309-334(0.33) 1242-1269(1.45)                                                                           |
| gnl UG Hs#S1727036  | 4.3  | 2 | 603-628(4.30) 635-663(0.30)                                                                                           |
| gnl UG Hs#S3988016  | 3.75 | 1 | 199-226(3.75)                                                                                                         |
| gnl UG Hs#S4045770  | 0.76 | 1 | 70-95(0.76)                                                                                                           |
| gnl UG Hs#S816213   | 1.17 | 2 | 1634-1659(1.14) 1767-1794(1.17)                                                                                       |
| gnl UG Hs#S3988007  | 0.94 | 1 | 95-120(0.94)                                                                                                          |
| gnl UG Hs#S1824328  | 0.3  | 1 | 742-768(0.30)                                                                                                         |
| gnl UG Hs#S11046721 | 2.87 | 1 | 1015-1040(2.87)                                                                                                       |

|                     |      |                                                                                                                         |
|---------------------|------|-------------------------------------------------------------------------------------------------------------------------|
| gnl UG Hs#S4807853  | 2.76 | 3 369-394(2.76) 528-553(2.56) 610-635(1.30)                                                                             |
| gnl UG Hs#S1730314  | 2.76 | 2 627-652(0.84) 826-851(2.76)                                                                                           |
| gnl UG Hs#S1728556  | 5.78 | 5 118-146(1.61) 433-457(0.53) 868-896(1.30) 949-974(5.78) 1086-1112(1.23)                                               |
| gnl UG Hs#S4825608  | 4.62 | 6 117-143(2.34) 918-943(0.14) 1015-1041(1.24) 1105-1132(0.55) 1434-1459(1.98) 1943-1968(4.62)                           |
| gnl UG Hs#S15730335 | 0.36 | 1 2670-2692(0.36)                                                                                                       |
| gnl UG Hs#S1969024  | 3.42 | 3 1005-1033(0.76) 1853-1881(3.42) 2596-2622(0.07)                                                                       |
| gnl UG Hs#S1732215  | 2.08 | 3 68-93(0.13) 507-532(0.46) 655-681(2.08)                                                                               |
| gnl UG Hs#S2294481  | 4.98 | 5 145-170(1.65) 227-252(0.30) 451-474(0.72) 494-519(4.98) 1288-1313(1.95)                                               |
| gnl UG Hs#S2140498  | 0.98 | 2 1938-1963(0.98) 2312-2337(0.79)                                                                                       |
| gnl UG Hs#S1726980  | 1.58 | 1 374-400(1.58)                                                                                                         |
| gnl UG Hs#S11046636 | 2.5  | 1 203-229(2.50)                                                                                                         |
| gnl UG Hs#S15638794 | 1.76 | 1 365-391(1.76)                                                                                                         |
| gnl UG Hs#S1730395  | 1.07 | 6 231-256(0.26) 458-484(0.07) 529-555(0.98) 896-922(1.07) 1089-1115(0.30) 1156-1184(0.74)                               |
| gnl UG Hs#S4554432  | 1.3  | 2 558-584(1.30) 606-631(1.30)                                                                                           |
| gnl UG Hs#S4435956  | 0.2  | 2 516-541(0.08) 946-971(0.20)                                                                                           |
| gnl UG Hs#S1727487  | 2.43 | 7 962-988(1.20) 2329-2354(1.52) 2417-2442(0.41) 2517-2542(1.72) 2702-2727(2.43) 3516-3541(0.17) 3572-3597(1.45)         |
| gnl UG Hs#S2139372  | 1.53 | 1 86-111(1.53)                                                                                                          |
| gnl UG Hs#S7111205  | 3.47 | 3 72-97(1.40) 102-126(0.04) 183-208(3.47)                                                                               |
| gnl UG Hs#S2140302  | 0.19 | 1 693-718(0.19)                                                                                                         |
| gnl UG Hs#S1729823  | 1.98 | 5 175-200(1.14) 727-755(1.98) 912-937(1.79) 1665-1690(0.04) 2355-2380(0.27)                                             |
| gnl UG Hs#S3219118  | 0.72 | 2 35-60(0.72) 414-439(0.30)                                                                                             |
| gnl UG Hs#S1728787  | 2.4  | 4 598-626(0.17) 628-653(0.14) 668-693(2.40) 1374-1400(0.58)                                                             |
| gnl UG Hs#S5930943  | 1.14 | 2 459-487(1.08) 518-543(1.14)                                                                                           |
| gnl UG Hs#S12743914 | 1.15 | 3 587-613(0.23) 1542-1569(1.15) 1596-1622(0.20)                                                                         |
| gnl UG Hs#S15631537 | 4.79 | 8 158-183(0.30) 457-482(4.79) 647-672(4.36) 711-736(2.32) 745-773(1.62) 1014-1040(4.56) 1440-1466(3.69) 1716-1744(0.01) |
| gnl UG Hs#S3438912  | 3.3  | 3 211-236(3.30) 310-335(2.98) 610-636(2.56)                                                                             |
| gnl UG Hs#S3438634  | 1.69 | 1 165-191(1.69)                                                                                                         |
| gnl UG Hs#S1728950  | 1.32 | 1 299-323(1.32)                                                                                                         |
| gnl UG Hs#S1728079  | 4.48 | 7 377-405(1.23) 1576-1600(0.14) 1777-1803(0.58) 1827-1852(1.36) 1929-1954(3.26) 2529-2554(4.48) 2744-2772(0.07)         |
| gnl UG Hs#S4817604  | 1.4  | 2 289-314(1.40) 857-884(0.39)                                                                                           |
| gnl UG Hs#S3219286  | 1.69 | 1 1378-1401(1.69)                                                                                                       |
| gnl UG Hs#S1729080  | 3.04 | 2 206-231(1.72) 687-713(3.04)                                                                                           |
| gnl UG Hs#S1731067  | 0.81 | 2 119-144(0.48) 168-196(0.81)                                                                                           |
| gnl UG Hs#S1726472  | 0.91 | 2 277-302(0.30) 616-641(0.91)                                                                                           |
| gnl UG Hs#S15631436 | 2.46 | 2 1879-1907(0.62) 2041-2066(2.46)                                                                                       |
| gnl UG Hs#S4824985  | 1.36 | 2 208-233(0.72) 333-355(1.36)                                                                                           |
| gnl UG Hs#S2139021  | 1.85 | 1 33-60(1.85)                                                                                                           |
| gnl UG Hs#S4816867  | 1.5  | 2 73-99(0.04) 405-430(1.50)                                                                                             |
| gnl UG Hs#S4827545  | 0.72 | 2 527-552(0.72) 1711-1737(0.17)                                                                                         |
| gnl UG Hs#S3219146  | 3.62 | 2 794-819(1.46) 833-861(3.62)                                                                                           |
| gnl UG Hs#S15631478 | 2.94 | 2 394-419(0.07) 485-510(2.94)                                                                                           |
| gnl UG Hs#S1728352  | 1.35 | 1 145-173(1.35)                                                                                                         |
| gnl UG Hs#S3547121  | 0.81 | 2 128-153(0.81) 355-383(0.23)                                                                                           |
| gnl UG Hs#S1728454  | 1.07 | 1 770-795(1.07)                                                                                                         |
| gnl UG Hs#S1730374  | 2.43 | 2 667-693(0.89) 1129-1154(2.43)                                                                                         |
| gnl UG Hs#S3219851  | 4.53 | 1 630-655(4.53)                                                                                                         |
| gnl UG Hs#S2293531  | 0.58 | 1 11-37(0.58)                                                                                                           |
| gnl UG Hs#S3817883  | 3.13 | 3 760-785(3.13) 834-859(0.72) 880-906(0.49)                                                                             |
| gnl UG Hs#S1731833  | 0.84 | 3 358-383(0.84) 397-422(0.84) 495-520(0.63)                                                                             |
| gnl UG Hs#S4807521  | 0.98 | 2 594-619(0.97) 860-888(0.98)                                                                                           |
| gnl UG Hs#S3219855  | 0.16 | 1 214-242(0.16)                                                                                                         |
| gnl UG Hs#S2139022  | 1.98 | 1 79-104(1.98)                                                                                                          |
| gnl UG Hs#S1726678  | 1.72 | 4 418-443(0.97) 728-751(0.19) 1382-1409(1.40) 2085-2110(1.72)                                                           |
| gnl UG Hs#S1729548  | 3.55 | 1 170-196(3.55)                                                                                                         |

|                     |      |   |                                                                                                              |
|---------------------|------|---|--------------------------------------------------------------------------------------------------------------|
| gnl UG Hs#S3220032  | 0.66 | 5 | 237-263(0.50) 983-1009(0.08) 1620-1645(0.66) 1949-1974(0.16) 1991-2016(0.58)                                 |
| gnl UG Hs#S1972679  | 0.94 | 3 | 1153-1179(0.40) 1905-1931(0.23) 2524-2549(0.94)                                                              |
| gnl UG Hs#S4807531  | 0.88 | 1 | 264-292(0.88)                                                                                                |
| gnl UG Hs#S3438989  | 5.5  | 7 | 110-135(1.46) 205-231(0.07) 360-385(1.48) 450-475(5.50) 581-608(3.71) 863-888(1.39) 1062-1090(2.08)          |
| gnl UG Hs#S3542620  | 0.23 | 1 | 847-873(0.23)                                                                                                |
| gnl UG Hs#S3542676  | 0.98 | 1 | 306-331(0.98)                                                                                                |
| gnl UG Hs#S1732381  | 0.97 | 3 | 853-879(0.43) 2014-2042(0.09) 2049-2074(0.97)                                                                |
| gnl UG Hs#S4830600  | 1.74 | 3 | 949-974(1.74) 1136-1161(0.72) 1984-2009(0.81)                                                                |
| gnl UG Hs#S14802279 | 0.13 | 1 | 1997-2022(0.13)                                                                                              |
| gnl UG Hs#S3218965  | 3.24 | 4 | 515-540(3.24) 594-619(0.68) 1063-1088(0.89) 1159-1184(0.30)                                                  |
| gnl UG Hs#S3355624  | 3.13 | 1 | 202-227(3.13)                                                                                                |
| gnl UG Hs#S15639833 | 0.65 | 1 | 257-282(0.65)                                                                                                |
| gnl UG Hs#S4046088  | 3.5  | 3 | 41-65(0.08) 390-415(3.50) 552-577(1.63)                                                                      |
| gnl UG Hs#S3547265  | 4.14 | 2 | 450-475(1.40) 4257-4283(4.14)                                                                                |
| gnl UG Hs#S15631740 | 0.32 | 1 | 453-478(0.32)                                                                                                |
| gnl UG Hs#S5930967  | 4.85 | 2 | 49-74(1.78) 333-358(4.85)                                                                                    |
| gnl UG Hs#S3619618  | 0.33 | 1 | 125-150(0.33)                                                                                                |
| gnl UG Hs#S1728608  | 0.58 | 1 | 391-418(0.58)                                                                                                |
| gnl UG Hs#S3619279  | 3.89 | 1 | 344-369(3.89)                                                                                                |
| gnl UG Hs#S3218883  | 0.98 | 2 | 317-342(0.98) 467-492(0.50)                                                                                  |
| gnl UG Hs#S2139258  | 0.14 | 1 | 440-465(0.14)                                                                                                |
| gnl UG Hs#S1731045  | 1.91 | 2 | 34-59(1.91) 457-482(0.88)                                                                                    |
| gnl UG Hs#S1728927  | 1.04 | 1 | 1554-1579(1.04)                                                                                              |
| gnl UG Hs#S4435612  | 1.89 | 3 | 8-34(1.89) 49-74(0.63) 182-207(0.89)                                                                         |
| gnl UG Hs#S2140376  | 5.52 | 1 | 800-825(5.52)                                                                                                |
| gnl UG Hs#S1731712  | 1.37 | 4 | 1511-1537(1.15) 1599-1626(1.37) 1648-1673(0.07) 2251-2275(0.62)                                              |
| gnl UG Hs#S4616424  | 1.04 | 1 | 997-1023(1.04)                                                                                               |
| gnl UG Hs#S3219303  | 2.21 | 3 | 467-492(2.21) 1124-1149(2.13) 1588-1613(1.47)                                                                |
| gnl UG Hs#S2140525  | 0.63 | 1 | 40-65(0.63)                                                                                                  |
| gnl UG Hs#S1730426  | 1.2  | 3 | 352-377(1.20) 474-500(0.66) 622-647(0.24)                                                                    |
| gnl UG Hs#S1728441  | 0.98 | 1 | 66-92(0.98)                                                                                                  |
| gnl UG Hs#S3438188  | 0.62 | 1 | 3375-3400(0.62)                                                                                              |
| gnl UG Hs#S3438516  | 1.07 | 1 | 1519-1544(1.07)                                                                                              |
| gnl UG Hs#S4821945  | 0.17 | 1 | 829-855(0.17)                                                                                                |
| gnl UG Hs#S4813882  | 0.62 | 1 | 182-207(0.62)                                                                                                |
| gnl UG Hs#S4807879  | 0.03 | 1 | 1669-1697(0.03)                                                                                              |
| gnl UG Hs#S4829274  | 1.79 | 4 | 1-26(1.79) 249-274(0.58) 2433-2459(0.54) 3189-3214(0.23)                                                     |
| gnl UG Hs#S5699     | 2.29 | 7 | 253-280(1.10) 421-443(2.29) 545-571(0.17) 774-802(0.08) 930-958(0.49) 1075-1100(1.04) 1346-1371(1.57)        |
| gnl UG Hs#S2139977  | 1.86 | 3 | 28-53(1.41) 348-374(1.86) 612-638(0.50)                                                                      |
| gnl UG Hs#S1728177  | 0.94 | 2 | 1603-1628(0.94) 1760-1786(0.58)                                                                              |
| gnl UG Hs#S5930895  | 0.56 | 1 | 834-859(0.56)                                                                                                |
| gnl UG Hs#S2294534  | 3.94 | 2 | 515-540(1.74) 649-674(3.94)                                                                                  |
| gnl UG Hs#S1729244  | 3.79 | 4 | 166-191(0.57) 416-441(1.79) 473-498(1.82) 1051-1076(3.79)                                                    |
| gnl UG Hs#S4826812  | 0.23 | 1 | 3-31(0.23)                                                                                                   |
| gnl UG Hs#S3439035  | 0.36 | 2 | 972-998(0.19) 1023-1051(0.36)                                                                                |
| gnl UG Hs#S1729117  | 0.84 | 2 | 16-42(0.84) 78-106(0.62)                                                                                     |
| gnl UG Hs#S14902415 | 4.25 | 7 | 98-121(0.79) 1877-1902(0.53) 2013-2038(0.14) 2249-2277(0.23) 3225-3250(4.25) 3683-3711(1.66) 4068-4094(2.91) |
| gnl UG Hs#S2139646  | 1.67 | 5 | 594-620(0.02) 656-682(1.67) 1331-1356(0.04) 1899-1924(0.40) 2000-2025(0.74)                                  |
| gnl UG Hs#S6687073  | 0.43 | 1 | 1718-1744(0.43)                                                                                              |
| gnl UG Hs#S2329515  | 3.62 | 3 | 644-669(3.62) 1065-1091(1.46) 2075-2100(2.40)                                                                |
| gnl UG Hs#S3439069  | 5.47 | 2 | 298-324(1.82) 470-498(5.47)                                                                                  |
| gnl UG Hs#S2138904  | 2.15 | 1 | 181-208(2.15)                                                                                                |
| gnl UG Hs#S7112487  | 1.57 | 2 | 2-27(1.57) 121-146(0.21)                                                                                     |
| gnl UG Hs#S4820808  | 0.3  | 1 | 155-183(0.30)                                                                                                |

|                     |      |                                                                                                                                                                |
|---------------------|------|----------------------------------------------------------------------------------------------------------------------------------------------------------------|
| gnl UG Hs#S1728969  | 1.65 | 1 32-57(1.65)                                                                                                                                                  |
| gnl UG Hs#S3603106  | 2.82 | 6 121-146(0.59) 909-934(0.91) 981-1006(1.72) 2108-2133(2.82) 2703-2728(0.98) 3563-3588(0.07)                                                                   |
| gnl UG Hs#S1731484  | 4.15 | 2 8-35(0.04) 326-352(4.15)                                                                                                                                     |
| gnl UG Hs#S6163451  | 2.13 | 1 21-46(2.13)                                                                                                                                                  |
| gnl UG Hs#S15636688 | 0.98 | 1 672-697(0.98)                                                                                                                                                |
| gnl UG Hs#S2293653  | 2.13 | 1 335-360(2.13)                                                                                                                                                |
| gnl UG Hs#S1730309  | 2.73 | 1 145-171(2.73)                                                                                                                                                |
| gnl UG Hs#S15638157 | 1.34 | 1 213-239(1.34)                                                                                                                                                |
| gnl UG Hs#S4046174  | 0.59 | 1 236-264(0.59)                                                                                                                                                |
| gnl UG Hs#S4807670  | 2.57 | 2 68-94(2.57) 159-184(0.84)                                                                                                                                    |
| gnl UG Hs#S2140200  | 3.04 | 1 1740-1766(3.04)                                                                                                                                              |
| gnl UG Hs#S3219205  | 1.93 | 2 852-877(0.14) 1575-1600(1.93)                                                                                                                                |
| gnl UG Hs#S4554543  | 0.07 | 1 1518-1544(0.07)                                                                                                                                              |
| gnl UG Hs#S4815101  | 0.07 | 1 74-99(0.07)                                                                                                                                                  |
| gnl UG Hs#S1731324  | 2.3  | 1 844-869(2.30)                                                                                                                                                |
| gnl UG Hs#S1729853  | 1.82 | 2 554-580(0.46) 772-798(1.82)                                                                                                                                  |
| gnl UG Hs#S1729406  | 2.72 | 2 1110-1137(0.70) 1244-1270(2.72)                                                                                                                              |
| gnl UG Hs#S4284766  | 4.43 | 1 133-157(4.43)                                                                                                                                                |
| gnl UG Hs#S1730948  | 2.91 | 2 251-277(2.91) 348-376(0.15)                                                                                                                                  |
| gnl UG Hs#S1731334  | 2.31 | 4 756-781(2.31) 1381-1408(0.23) 1527-1552(2.13) 3181-3207(0.50)                                                                                                |
| gnl UG Hs#S4810349  | 4.04 | 2 2037-2062(4.04) 2131-2156(2.72)                                                                                                                              |
| gnl UG Hs#S1731014  | 0.46 | 2 812-840(0.30) 961-986(0.46)                                                                                                                                  |
| gnl UG Hs#S2294330  | 2    | 1 225-250(2.00)                                                                                                                                                |
| gnl UG Hs#S4631399  | 0.92 | 2 1109-1136(0.92) 1218-1245(0.61)                                                                                                                              |
| gnl UG Hs#S1731191  | 1.26 | 1 217-241(1.26)                                                                                                                                                |
| gnl UG Hs#S1729877  | 0.91 | 1 1481-1506(0.91)                                                                                                                                              |
| gnl UG Hs#S4546011  | 0.46 | 1 495-521(0.46)                                                                                                                                                |
| gnl UG Hs#S5978612  | 2.4  | 3 618-643(1.72) 1831-1859(2.40) 1880-1906(0.07)                                                                                                                |
| gnl UG Hs#S2138973  | 2.17 | 7 471-496(0.50) 675-700(0.65) 1237-1265(1.20) 1457-1483(2.17) 1596-1621(1.04) 1915-1940(2.07) 1973-1998(0.11)                                                  |
| gnl UG Hs#S1729720  | 0.07 | 1 530-558(0.07)                                                                                                                                                |
| gnl UG Hs#S1728644  | 1.08 | 2 97-123(0.69) 379-405(1.08)                                                                                                                                   |
| gnl UG Hs#S1727238  | 2.04 | 5 226-251(2.04) 605-630(0.47) 788-814(1.66) 1266-1291(1.98) 1312-1338(0.97)                                                                                    |
| gnl UG Hs#S2139016  | 3.5  | 3 1064-1087(1.30) 1288-1314(3.50) 1446-1474(0.33)                                                                                                              |
| gnl UG Hs#S2140604  | 1.11 | 2 37-62(1.07) 1202-1227(1.11)                                                                                                                                  |
| gnl UG Hs#S6163426  | 3.84 | 7 180-205(3.84) 260-286(2.13) 340-365(0.81) 731-757(0.94) 1177-1203(1.10) 1410-1436(1.01) 1745-1771(1.57)                                                      |
| gnl UG Hs#S1729889  | 2.4  | 2 435-460(2.40) 749-774(1.33)                                                                                                                                  |
| gnl UG Hs#S1729710  | 0.4  | 2 450-475(0.40) 649-674(0.17)                                                                                                                                  |
| gnl UG Hs#S4816549  | 1.94 | 3 212-238(1.04) 595-621(1.94) 1054-1079(0.17)                                                                                                                  |
| gnl UG Hs#S5978948  | 1.94 | 3 4-29(1.94) 269-292(1.89) 722-745(1.25)                                                                                                                       |
| gnl UG Hs#S15639767 | 0.24 | 1 253-279(0.24)                                                                                                                                                |
| gnl UG Hs#S14273454 | 0.66 | 2 236-261(0.04) 377-405(0.66)                                                                                                                                  |
| gnl UG Hs#S2649413  | 2.62 | 10 118-144(2.62) 431-457(2.40) 1292-1319(0.51) 1684-1710(0.84) 1727-1754(0.45) 2197-2223(2.11) 2299-2324(1.52) 2340-2365(1.07) 2661-2686(0.56) 2756-2782(0.98) |
| gnl UG Hs#S2294286  | 3.81 | 4 264-289(0.87) 1030-1055(0.44) 1076-1101(1.25) 1212-1240(3.81)                                                                                                |
| gnl UG Hs#S2139240  | 2.98 | 3 1674-1700(2.76) 2137-2158(1.37) 2368-2395(2.98)                                                                                                              |
| gnl UG Hs#S1727978  | 9.43 | 4 544-569(9.43) 767-792(1.13) 937-961(0.88) 1094-1121(2.82)                                                                                                    |
| gnl UG Hs#S2293567  | 0.23 | 1 2161-2186(0.23)                                                                                                                                              |
| gnl UG Hs#S2294419  | 1.26 | 2 840-868(1.26) 877-903(0.27)                                                                                                                                  |
| gnl UG Hs#S7111393  | 4.04 | 5 295-318(2.47) 696-722(1.62) 861-887(1.17) 1105-1130(0.04) 1498-1524(4.04)                                                                                    |
| gnl UG Hs#S5978439  | 0.26 | 1 261-286(0.26)                                                                                                                                                |
| gnl UG Hs#S3547208  | 0.4  | 1 658-683(0.40)                                                                                                                                                |
| gnl UG Hs#S1726244  | 1.13 | 1 377-402(1.13)                                                                                                                                                |
| gnl UG Hs#S3603198  | 1.4  | 1 3066-3094(1.40)                                                                                                                                              |
| gnl UG Hs#S1729594  | 0.62 | 1 904-931(0.62)                                                                                                                                                |
| gnl UG Hs#S1726644  | 0.91 | 1 446-472(0.91)                                                                                                                                                |

|                     |      |   |                                                                                                                    |
|---------------------|------|---|--------------------------------------------------------------------------------------------------------------------|
| gnl UG Hs#S4812072  | 1.33 | 1 | 972-997(1.33)                                                                                                      |
| gnl UG Hs#S4809359  | 0.36 | 1 | 798-823(0.36)                                                                                                      |
| gnl UG Hs#S2293350  | 1.2  | 4 | 206-231(0.04) 625-651(1.04) 997-1022(1.20) 1240-1268(0.77)                                                         |
| gnl UG Hs#S4614236  | 2.57 | 1 | 1736-1761(2.57)                                                                                                    |
| gnl UG Hs#S1729673  | 0.16 | 1 | 1146-1171(0.16)                                                                                                    |
| gnl UG Hs#S1824302  | 1.82 | 1 | 185-211(1.82)                                                                                                      |
| gnl UG Hs#S4827444  | 0.03 | 1 | 677-705(0.03)                                                                                                      |
| gnl UG Hs#S1730036  | 2.91 | 1 | 848-876(2.91)                                                                                                      |
| gnl UG Hs#S3220003  | 2.36 | 4 | 808-833(2.33) 898-923(2.36) 1356-1380(1.73) 1517-1542(0.23)                                                        |
| gnl UG Hs#S4815827  | 2.64 | 4 | 273-298(0.91) 674-699(0.08) 1661-1689(2.64) 2472-2497(1.62)                                                        |
| gnl UG Hs#S10831963 | 0.56 | 1 | 575-599(0.56)                                                                                                      |
| gnl UG Hs#S1727745  | 3.43 | 1 | 143-168(3.43)                                                                                                      |
| gnl UG Hs#S1727791  | 5.72 | 1 | 642-668(5.72)                                                                                                      |
| gnl UG Hs#S1729259  | 0.4  | 1 | 57-82(0.40)                                                                                                        |
| gnl UG Hs#S553719   | 4.68 | 7 | 763-789(2.50) 1343-1367(0.04) 2230-2256(0.76) 3895-3920(4.68) 4098-4123(0.40) 4358-4383(1.89) 4557-4585(0.71)      |
| gnl UG Hs#S4046150  | 2.94 | 1 | 343-368(2.94)                                                                                                      |
| gnl UG Hs#S2139452  | 2.37 | 4 | 967-992(1.26) 1539-1564(0.53) 2027-2051(2.37) 3337-3363(0.98)                                                      |
| gnl UG Hs#S3803675  | 1.82 | 8 | 227-252(1.82) 396-421(0.41) 439-464(0.07) 632-657(0.40) 730-760(1.33) 762-790(0.01) 988-1014(1.55) 1077-1106(1.61) |
| gnl UG Hs#S10831563 | 2.2  | 6 | 376-400(0.48) 513-536(2.20) 643-668(1.13) 879-904(0.33) 1115-1141(0.67) 1313-1339(1.08)                            |
| gnl UG Hs#S5979235  | 1.55 | 1 | 95-121(1.55)                                                                                                       |
| gnl UG Hs#S1731030  | 1.34 | 2 | 31-57(1.34) 161-188(0.62)                                                                                          |
| gnl UG Hs#S1731913  | 1.3  | 1 | 198-224(1.30)                                                                                                      |
| gnl UG Hs#S2293515  | 2.15 | 1 | 231-257(2.15)                                                                                                      |
| gnl UG Hs#S3603816  | 2.36 | 1 | 351-379(2.36)                                                                                                      |
| gnl UG Hs#S3601631  | 4.4  | 4 | 853-879(1.14) 2717-2743(4.40) 3467-3495(0.23) 3654-3680(0.27)                                                      |
| gnl UG Hs#S5979131  | 0.62 | 4 | 947-973(0.62) 983-1008(0.34) 1133-1158(0.13) 1197-1224(0.48)                                                       |
| gnl UG Hs#S3219741  | 6.85 | 1 | 176-201(6.85)                                                                                                      |
| gnl UG Hs#S4816640  | 1.21 | 3 | 1795-1820(0.40) 2109-2132(0.13) 2781-2807(1.21)                                                                    |
| gnl UG Hs#S1728959  | 1.08 | 1 | 431-456(1.08)                                                                                                      |
| gnl UG Hs#S4283824  | 1.5  | 4 | 548-573(0.57) 689-714(0.33) 730-755(1.50) 866-892(0.17)                                                            |
| gnl UG Hs#S4810873  | 2.69 | 2 | 297-322(1.34) 335-360(2.69)                                                                                        |
| gnl UG Hs#S1090734  | 1.01 | 2 | 1642-1667(0.84) 1944-1969(1.01)                                                                                    |
| gnl UG Hs#S11047047 | 0.9  | 1 | 2148-2171(0.90)                                                                                                    |
| gnl UG Hs#S5978605  | 2.97 | 1 | 1706-1731(2.97)                                                                                                    |
| gnl UG Hs#S1824397  | 0.07 | 1 | 1076-1101(0.07)                                                                                                    |
| gnl UG Hs#S4396097  | 2.3  | 2 | 9-34(2.04) 75-100(2.30)                                                                                            |
| gnl UG Hs#S2293476  | 3.34 | 3 | 244-271(0.28) 295-324(2.36) 1807-1832(3.34)                                                                        |
| gnl UG Hs#S4553172  | 0.95 | 1 | 539-562(0.95)                                                                                                      |
| gnl UG Hs#S1726490  | 4.55 | 2 | 2797-2823(4.55) 2824-2849(1.33)                                                                                    |
| gnl UG Hs#S4807954  | 1.57 | 2 | 874-899(1.57) 1094-1120(0.98)                                                                                      |
| gnl UG Hs#S1726660  | 1.53 | 1 | 262-288(1.53)                                                                                                      |
| gnl UG Hs#S3803503  | 0.62 | 1 | 217-242(0.62)                                                                                                      |
| gnl UG Hs#S2294218  | 3.75 | 1 | 168-193(3.75)                                                                                                      |
| gnl UG Hs#S4616143  | 1.4  | 2 | 1926-1951(1.40) 2382-2411(0.79)                                                                                    |
| gnl UG Hs#S5931267  | 3.11 | 1 | 418-443(3.11)                                                                                                      |
| gnl UG Hs#S3219951  | 2.36 | 3 | 309-334(2.36) 351-377(1.20) 418-444(2.26)                                                                          |
| gnl UG Hs#S5978798  | 0.34 | 1 | 230-257(0.34)                                                                                                      |
| gnl UG Hs#S1732205  | 0.72 | 2 | 427-452(0.72) 710-735(0.28)                                                                                        |
| gnl UG Hs#S1729307  | 1.62 | 1 | 326-352(1.62)                                                                                                      |
| gnl UG Hs#S1731775  | 3.33 | 5 | 197-223(1.76) 301-328(0.41) 850-876(3.33) 968-993(0.49) 1047-1073(1.01)                                            |
| gnl UG Hs#S4807691  | 6.3  | 3 | 247-272(6.30) 369-394(2.50) 1390-1415(0.16)                                                                        |
| gnl UG Hs#S4553583  | 0.47 | 2 | 386-411(0.47) 444-472(0.01)                                                                                        |
| gnl UG Hs#S4553446  | 2.83 | 5 | 385-410(0.65) 624-651(0.24) 717-742(1.48) 816-841(2.83) 1068-1094(1.34)                                            |
| gnl UG Hs#S15846850 | 2.89 | 5 | 108-134(1.39) 1002-1028(2.89) 1264-1289(1.16) 2030-2055(0.48) 2101-2127(0.05)                                      |

|                     |      |                                                                                                           |
|---------------------|------|-----------------------------------------------------------------------------------------------------------|
| gnl UG Hs#S4614181  | 0.46 | 1 504-531(0.46)                                                                                           |
| gnl UG Hs#S1732351  | 0.94 | 2 482-507(0.94) 564-592(0.85)                                                                             |
| gnl UG Hs#S1731092  | 1.27 | 1 379-407(1.27)                                                                                           |
| gnl UG Hs#S1727068  | 1.49 | 1 1594-1622(1.49)                                                                                         |
| gnl UG Hs#S7112481  | 4.79 | 1 97-122(4.79)                                                                                            |
| gnl UG Hs#S4810629  | 1.5  | 1 911-936(1.50)                                                                                           |
| gnl UG Hs#S4827232  | 3.34 | 7 192-220(0.71) 227-253(1.41) 590-616(2.69) 902-929(0.24) 2035-2060(0.76) 2286-2311(3.34) 2978-3003(2.97) |
| gnl UG Hs#S1727413  | 0.37 | 1 399-422(0.37)                                                                                           |
| gnl UG Hs#S3355687  | 0.4  | 1 1094-1117(0.40)                                                                                         |
| gnl UG Hs#S4816553  | 1.07 | 1 20-48(1.07)                                                                                             |
| gnl UG Hs#S3992070  | 1.39 | 2 1301-1328(1.39) 1765-1788(0.25)                                                                         |
| gnl UG Hs#S5495037  | 3.79 | 1 188-213(3.79)                                                                                           |
| gnl UG Hs#S4553530  | 0.76 | 2 340-366(0.76) 640-665(0.52)                                                                             |
| gnl UG Hs#S1726213  | 1.16 | 2 760-784(1.16) 1033-1059(0.08)                                                                           |
| gnl UG Hs#S1729602  | 0.3  | 2 483-511(0.23) 1584-1609(0.30)                                                                           |
| gnl UG Hs#S1731719  | 0.63 | 3 254-279(0.63) 1595-1620(0.20) 1651-1676(0.36)                                                           |
| gnl UG Hs#S4435865  | 0.69 | 1 1848-1874(0.69)                                                                                         |
| gnl UG Hs#S1732441  | 0.49 | 2 575-603(0.04) 648-676(0.49)                                                                             |
| gnl UG Hs#S5978666  | 4.2  | 5 70-96(0.13) 391-416(4.20) 883-909(0.01) 1529-1555(0.66) 2362-2385(0.56)                                 |
| gnl UG Hs#S6664652  | 4.11 | 2 23-48(0.55) 102-127(4.11)                                                                               |
| gnl UG Hs#S5978528  | 5.26 | 3 360-385(5.26) 667-690(0.24) 938-963(0.33)                                                               |
| gnl UG Hs#S1729960  | 3.72 | 1 174-199(3.72)                                                                                           |
| gnl UG Hs#S14802368 | 0.3  | 1 971-994(0.30)                                                                                           |
| gnl UG Hs#S4807662  | 2.4  | 3 545-571(1.27) 624-649(0.57) 1112-1137(2.40)                                                             |
| gnl UG Hs#S1727637  | 1.45 | 1 919-947(1.45)                                                                                           |
| gnl UG Hs#S3219628  | 1.66 | 5 135-163(1.66) 317-342(1.11) 450-475(0.26) 600-623(0.45) 801-826(1.13)                                   |
| gnl UG Hs#S3601515  | 0.17 | 1 397-422(0.17)                                                                                           |
| gnl UG Hs#S4820086  | 2.26 | 1 487-512(2.26)                                                                                           |
| gnl UG Hs#S1728881  | 4.49 | 6 164-189(2.23) 549-574(4.04) 650-675(4.49) 1037-1064(0.62) 1822-1847(0.39) 1925-1951(2.30)               |
| gnl UG Hs#S1824309  | 0.17 | 1 124-150(0.17)                                                                                           |
| gnl UG Hs#S15644235 | 0.69 | 2 13-38(0.59) 60-85(0.69)                                                                                 |
| gnl UG Hs#S1726611  | 0.11 | 1 165-190(0.11)                                                                                           |
| gnl UG Hs#S1726218  | 2.35 | 4 283-311(1.97) 338-362(1.14) 416-441(1.78) 542-567(2.35)                                                 |
| gnl UG Hs#S4554616  | 2.67 | 1 258-283(2.67)                                                                                           |
| gnl UG Hs#S5978398  | 1.91 | 4 30-58(1.81) 807-832(0.33) 858-883(1.91) 1119-1145(0.21)                                                 |
| gnl UG Hs#S11046706 | 2.52 | 3 105-131(0.66) 277-302(2.52) 688-712(0.88)                                                               |
| gnl UG Hs#S3219509  | 3.79 | 4 152-180(1.07) 747-775(0.33) 880-905(3.79) 915-940(0.50)                                                 |
| gnl UG Hs#S3220223  | 4.21 | 2 908-934(2.50) 1349-1374(4.21)                                                                           |
| gnl UG Hs#S15639083 | 2.65 | 4 318-346(2.65) 282-307(0.07) 1428-1453(1.11) 1662-1686(0.98)                                             |
| gnl UG Hs#S15638434 | 4.4  | 3 143-169(4.40) 398-424(1.30) 669-692(1.24)                                                               |
| gnl UG Hs#S4284726  | 0.4  | 1 83-109(0.40)                                                                                            |
| gnl UG Hs#S2294299  | 2.08 | 1 436-462(2.08)                                                                                           |
| gnl UG Hs#S3439007  | 0.34 | 1 363-388(0.34)                                                                                           |
| gnl UG Hs#S2293748  | 0.14 | 1 612-638(0.14)                                                                                           |
| gnl UG Hs#S7111352  | 0.04 | 1 655-681(0.04)                                                                                           |
| gnl UG Hs#S3803689  | 0.89 | 1 1477-1500(0.89)                                                                                         |
| gnl UG Hs#S15898531 | 0.56 | 1 1665-1691(0.56)                                                                                         |
| gnl UG Hs#S3881168  | 0.34 | 1 277-302(0.34)                                                                                           |
| gnl UG Hs#S3619293  | 0.84 | 1 548-576(0.84)                                                                                           |
| gnl UG Hs#S1727137  | 2.56 | 2 148-173(2.56) 405-430(1.30)                                                                             |
| gnl UG Hs#S1730792  | 2.04 | 3 317-344(1.55) 403-429(1.72) 453-478(2.04)                                                               |
| gnl UG Hs#S11154090 | 2.5  | 1 269-294(2.50)                                                                                           |
| gnl UG Hs#S3601673  | 0.59 | 1 128-156(0.59)                                                                                           |
| gnl UG Hs#S1731463  | 1.36 | 1 65-92(1.36)                                                                                             |

|                     |      |                                                                                                                                             |
|---------------------|------|---------------------------------------------------------------------------------------------------------------------------------------------|
| gnl UG Hs#S1728370  | 0.23 | 1 365-391(0.23)                                                                                                                             |
| gnl UG Hs#S1730402  | 2.94 | 8 279-305(0.33) 932-957(0.68) 1408-1433(0.20) 1897-1923(1.86) 1927-1952(0.30) 2335-2360(2.94) 4097-4122(1.43) 4839-4866(2.20)               |
| gnl UG Hs#S3220040  | 1.15 | 1 676-701(1.15)                                                                                                                             |
| gnl UG Hs#S5978595  | 3.3  | 8 246-271(0.72) 461-486(2.92) 787-812(0.30) 966-993(1.42) 1074-1102(3.30) 1142-1171(1.81) 1617-1642(2.67) 1687-1715(2.15)                   |
| gnl UG Hs#S1727940  | 4.33 | 1 458-483(4.33)                                                                                                                             |
| gnl UG Hs#S3601682  | 2.68 | 4 292-318(2.68) 326-352(0.69) 358-382(0.40) 483-508(1.88)                                                                                   |
| gnl UG Hs#S4621265  | 1.13 | 1 1227-1255(1.13)                                                                                                                           |
| gnl UG Hs#S11046800 | 1.52 | 2 2152-2178(0.33) 2203-2229(1.52)                                                                                                           |
| gnl UG Hs#S1729092  | 1.21 | 1 246-274(1.21)                                                                                                                             |
| gnl UG Hs#S2294034  | 0.76 | 1 1385-1411(0.76)                                                                                                                           |
| gnl UG Hs#S1732370  | 3.57 | 3 353-380(1.14) 539-565(3.57) 665-690(2.47)                                                                                                 |
| gnl UG Hs#S2293504  | 1.46 | 3 561-587(0.33) 1334-1360(1.40) 1491-1516(1.46)                                                                                             |
| gnl UG Hs#S2139405  | 0.07 | 1 129-154(0.07)                                                                                                                             |
| gnl UG Hs#S6664841  | 1.43 | 3 1075-1100(0.23) 2227-2252(1.43) 2520-2543(0.47)                                                                                           |
| gnl UG Hs#S3220212  | 0.52 | 1 27-51(0.52)                                                                                                                               |
| gnl UG Hs#S4826757  | 0.82 | 1 576-602(0.82)                                                                                                                             |
| gnl UG Hs#S5931459  | 0.52 | 1 237-260(0.52)                                                                                                                             |
| gnl UG Hs#S4825464  | 2.19 | 3 515-539(1.99) 931-956(2.19) 1465-1490(1.90)                                                                                               |
| gnl UG Hs#S11046560 | 2.96 | 7 191-218(0.44) 551-577(2.30) 738-763(0.36) 782-810(2.96) 851-876(1.57) 1106-1132(0.82) 1377-1402(0.17)                                     |
| gnl UG Hs#S3603833  | 2.56 | 2 95-120(0.04) 466-491(2.56)                                                                                                                |
| gnl UG Hs#S3219818  | 2.57 | 2 299-324(1.24) 1134-1160(2.57)                                                                                                             |
| gnl UG Hs#S3438897  | 3.91 | 6 604-629(0.65) 809-836(3.91) 1180-1205(0.59) 1235-1260(0.62) 1281-1309(3.24) 1315-1340(3.30)                                               |
| gnl UG Hs#S4824077  | 2.72 | 7 317-345(0.07) 369-394(2.72) 1203-1228(2.17) 1971-1997(2.57) 2384-2409(0.48) 2727-2753(0.13) 2834-2860(0.30)                               |
| gnl UG Hs#S3219575  | 2.67 | 6 562-587(0.98) 760-784(0.73) 1002-1027(1.69) 1357-1382(0.76) 1606-1633(0.08) 1799-1825(2.67)                                               |
| gnl UG Hs#S15631443 | 1.91 | 1 202-227(1.91)                                                                                                                             |
| gnl UG Hs#S1727792  | 4.11 | 2 556-581(0.63) 628-654(4.11)                                                                                                               |
| gnl UG Hs#S2294213  | 2.48 | 1 179-204(2.48)                                                                                                                             |
| gnl UG Hs#S3940267  | 0.84 | 1 1303-1329(0.84)                                                                                                                           |
| gnl UG Hs#S15631489 | 5.18 | 1 453-479(5.18)                                                                                                                             |
| gnl UG Hs#S2294207  | 6.18 | 1 1899-1925(6.18)                                                                                                                           |
| gnl UG Hs#S1731450  | 1.43 | 2 773-798(1.43) 1238-1264(0.84)                                                                                                             |
| gnl UG Hs#S1726720  | 2.72 | 3 996-1022(2.72) 1525-1553(0.79) 3549-3574(2.30)                                                                                            |
| gnl UG Hs#S3220002  | 1.76 | 5 978-1003(1.08) 1186-1213(1.24) 1837-1863(1.76) 2184-2209(1.49) 2410-2435(0.33)                                                            |
| gnl UG Hs#S5978628  | 0.26 | 1 446-472(0.26)                                                                                                                             |
| gnl UG Hs#S15644061 | 3.24 | 4 1116-1142(0.50) 1943-1969(2.04) 1988-2013(3.24) 2085-2116(0.45)                                                                           |
| gnl UG Hs#S2293896  | 1.23 | 2 148-176(0.91) 827-853(1.23)                                                                                                               |
| gnl UG Hs#S2293292  | 2.68 | 4 267-292(2.68) 960-985(0.14) 1002-1027(0.40) 1193-1218(0.46)                                                                               |
| gnl UG Hs#S7112555  | 1.11 | 5 122-147(0.88) 210-238(0.50) 895-921(0.97) 1651-1674(1.11) 2911-2936(0.23)                                                                 |
| gnl UG Hs#S1730794  | 4.11 | 1 132-157(4.11)                                                                                                                             |
| gnl UG Hs#S2294309  | 0.72 | 1 160-186(0.72)                                                                                                                             |
| gnl UG Hs#S5517547  | 3.14 | 9 66-91(2.26) 352-380(1.16) 1070-1095(3.14) 1652-1677(1.53) 1851-1876(0.46) 1981-2009(0.23) 2111-2140(0.39) 2586-2613(0.42) 2821-2846(1.72) |
| gnl UG Hs#S2294021  | 0.47 | 1 100-128(0.47)                                                                                                                             |
| gnl UG Hs#S3220014  | 0.36 | 1 380-403(0.36)                                                                                                                             |
| gnl UG Hs#S1728112  | 1.15 | 1 233-258(1.15)                                                                                                                             |
| gnl UG Hs#S6163458  | 1.26 | 1 377-405(1.26)                                                                                                                             |
| gnl UG Hs#S15635470 | 0.23 | 1 131-157(0.23)                                                                                                                             |
| gnl UG Hs#S5978577  | 1.58 | 1 2079-2104(1.58)                                                                                                                           |
| gnl UG Hs#S1726633  | 2.4  | 1 133-158(2.40)                                                                                                                             |
| gnl UG Hs#S7112062  | 1.46 | 2 186-211(0.67) 236-261(1.46)                                                                                                               |
| gnl UG Hs#S4546092  | 2.08 | 1 403-428(2.08)                                                                                                                             |
| gnl UG Hs#S15641456 | 3.24 | 5 351-376(3.24) 381-406(1.04) 419-446(0.62) 845-873(1.85) 885-910(0.40)                                                                     |
| gnl UG Hs#S2140446  | 2.39 | 1 639-664(2.39)                                                                                                                             |
| gnl UG Hs#S4822106  | 0.24 | 2 168-196(0.13) 461-486(0.24)                                                                                                               |
| gnl UG Hs#S3547081  | 1.98 | 2 3638-3666(0.81) 3742-3767(1.98)                                                                                                           |



|                     |      |    |                 |                 |                 |                 |                 |
|---------------------|------|----|-----------------|-----------------|-----------------|-----------------|-----------------|
| gnl UG Hs#S2139556  | 5.08 | 5  | 143-171(0.52)   | 179-204(0.72)   | 264-290(0.54)   | 1249-1274(1.24) | 1390-1416(5.08) |
| gnl UG Hs#S1731931  | 1.45 | 1  | 675-699(1.45)   |                 |                 |                 |                 |
| gnl UG Hs#S1730017  | 1.3  | 2  | 689-712(0.99)   | 1285-1312(1.30) |                 |                 |                 |
| gnl UG Hs#S6693362  | 3.2  | 3  | 803-828(3.20)   | 928-953(0.04)   | 1715-1740(0.72) |                 |                 |
| gnl UG Hs#S4828106  | 1.42 | 3  | 401-428(0.09)   | 581-608(1.42)   | 1177-1203(1.40) |                 |                 |
| gnl UG Hs#S3219532  | 1.62 | 2  | 263-289(0.46)   | 296-321(1.62)   |                 |                 |                 |
| gnl UG Hs#S3619557  | 4.3  | 1  | 128-156(4.30)   |                 |                 |                 |                 |
| gnl UG Hs#S4284380  | 3.52 | 2  | 1377-1402(3.52) | 3897-3922(0.11) |                 |                 |                 |
| gnl UG Hs#S1824345  | 1.65 | 4  | 533-558(0.01)   | 1914-1940(0.72) | 2506-2532(1.65) | 3095-3120(0.30) |                 |
| gnl UG Hs#S5978629  | 2.53 | 12 | 195-222(0.52)   | 781-807(0.53)   | 831-856(0.33)   | 897-922(0.75)   | 1355-1380(2.53) |
| gnl UG Hs#S3619335  | 0.97 | 1  | 218-241(0.97)   |                 |                 |                 |                 |
| gnl UG Hs#S1732418  | 1.04 | 2  | 368-394(0.44)   | 423-448(1.04)   |                 |                 |                 |
| gnl UG Hs#S3619732  | 0.64 | 1  | 422-450(0.64)   |                 |                 |                 |                 |
| gnl UG Hs#S3547088  | 0.43 | 1  | 1119-1145(0.43) |                 |                 |                 |                 |
| gnl UG Hs#S1729898  | 1.3  | 2  | 153-179(1.30)   | 185-210(0.08)   |                 |                 |                 |
| gnl UG Hs#S15640252 | 1.81 | 1  | 176-204(1.81)   |                 |                 |                 |                 |
| gnl UG Hs#S3219463  | 0.94 | 2  | 1189-1214(0.94) | 1559-1585(0.65) |                 |                 |                 |
| gnl UG Hs#S2293293  | 0.72 | 2  | 320-346(0.72)   | 424-449(0.72)   |                 |                 |                 |
| gnl UG Hs#S3219439  | 0.13 | 1  | 828-853(0.13)   |                 |                 |                 |                 |
| gnl UG Hs#S3219472  | 2.46 | 1  | 104-129(2.46)   |                 |                 |                 |                 |
| gnl UG Hs#S3219688  | 0.55 | 1  | 84-109(0.55)    |                 |                 |                 |                 |
| gnl UG Hs#S1731837  | 5.78 | 2  | 205-231(0.90)   | 428-453(5.78)   |                 |                 |                 |
| gnl UG Hs#S1730778  | 3.3  | 1  | 1759-1784(3.30) |                 |                 |                 |                 |
| gnl UG Hs#S3437922  | 3.79 | 6  | 36-61(0.25)     | 191-216(0.30)   | 340-365(0.13)   | 504-529(3.79)   | 1052-1077(0.46) |
| gnl UG Hs#S14863777 | 0.81 | 1  | 14-42(0.81)     |                 |                 |                 |                 |
| gnl UG Hs#S1728263  | 5.82 | 1  | 62-87(5.82)     |                 |                 |                 |                 |
| gnl UG Hs#S15633722 | 1.9  | 2  | 76-101(1.90)    | 1320-1348(1.71) |                 |                 |                 |
| gnl UG Hs#S4831120  | 3.16 | 7  | 64-89(0.72)     | 692-717(0.23)   | 1400-1425(1.30) | 1886-1911(3.16) | 2328-2353(0.72) |
| gnl UG Hs#S2139597  | 0.82 | 1  | 2650-2675(0.82) |                 |                 |                 |                 |
| gnl UG Hs#S4826636  | 0.88 | 1  | 87-112(0.88)    |                 |                 |                 |                 |
| gnl UG Hs#S1730667  | 0.14 | 1  | 785-810(0.14)   |                 |                 |                 |                 |
| gnl UG Hs#S15115683 | 2.65 | 2  | 296-321(2.65)   | 357-385(0.81)   |                 |                 |                 |
| gnl UG Hs#S4046177  | 3.52 | 2  | 1640-1665(2.13) | 2170-2195(3.52) |                 |                 |                 |
| gnl UG Hs#S1969100  | 2.3  | 6  | 145-171(1.01)   | 1613-1638(2.30) | 1674-1699(0.97) | 1872-1901(1.29) | 2060-2088(1.66) |
| gnl UG Hs#S3438161  | 2.69 | 9  | 130-154(0.44)   | 488-513(1.01)   | 1144-1170(0.56) | 1307-1335(1.26) | 2205-2233(1.47) |
| gnl UG Hs#S2140507  | 1.52 | 1  | 177-205(1.52)   |                 |                 |                 |                 |
| gnl UG Hs#S2138670  | 1.3  | 1  | 478-503(1.30)   |                 |                 |                 |                 |
| gnl UG Hs#S3817923  | 0.94 | 3  | 124-152(0.94)   | 278-307(0.39)   | 399-425(0.82)   |                 |                 |
| gnl UG Hs#S4819908  | 0.5  | 2  | 264-289(0.50)   | 1576-1601(0.30) |                 |                 |                 |
| gnl UG Hs#S3355659  | 1.21 | 1  | 63-88(1.21)     |                 |                 |                 |                 |
| gnl UG Hs#S1729620  | 0.4  | 1  | 152-177(0.40)   |                 |                 |                 |                 |
| gnl UG Hs#S1729634  | 2.62 | 5  | 4-28(1.53)      | 200-226(2.62)   | 510-535(1.46)   | 595-620(1.20)   | 899-925(0.33)   |
| gnl UG Hs#S1730084  | 1.98 | 11 | 284-310(0.40)   | 450-476(0.58)   | 1572-1597(0.62) | 2386-2412(0.11) | 2563-2589(0.11) |
| gnl UG Hs#S2294426  | 0.91 | 1  | 274-300(0.91)   |                 |                 |                 |                 |
| gnl UG Hs#S1729781  | 1.2  | 1  | 36-61(1.20)     |                 |                 |                 |                 |
| gnl UG Hs#S2293250  | 2.13 | 1  | 231-256(2.13)   |                 |                 |                 |                 |
| gnl UG Hs#S3219660  | 0.13 | 1  | 67-93(0.13)     |                 |                 |                 |                 |
| gnl UG Hs#S7111251  | 0.16 | 1  | 590-615(0.16)   |                 |                 |                 |                 |
| gnl UG Hs#S2294541  | 0.13 | 1  | 236-265(0.13)   |                 |                 |                 |                 |
| gnl UG Hs#S4826191  | 0.59 | 1  | 1224-1248(0.59) |                 |                 |                 |                 |
| gnl UG Hs#S2293554  | 0.79 | 2  | 1106-1131(0.17) | 1223-1249(0.79) |                 |                 |                 |
| gnl UG Hs#S1729506  | 1.83 | 2  | 1111-1136(1.83) | 1684-1710(0.86) |                 |                 |                 |
| gnl UG Hs#S1728908  | 1.27 | 1  | 621-647(1.27)   |                 |                 |                 |                 |
| gnl UG Hs#S2139970  | 1.03 | 3  | 125-150(1.03)   | 1200-1225(0.14) | 1341-1367(0.23) |                 |                 |

|                     |      |                                                                                                                                                                                                |
|---------------------|------|------------------------------------------------------------------------------------------------------------------------------------------------------------------------------------------------|
| gnl UG Hs#S3814610  | 2.3  | 1 509-534(2.30)                                                                                                                                                                                |
| gnl UG Hs#S5979196  | 2.75 | 1 7-32(2.75)                                                                                                                                                                                   |
| gnl UG Hs#S4823222  | 0.82 | 1 664-690(0.82)                                                                                                                                                                                |
| gnl UG Hs#S2293683  | 2.47 | 1 251-274(2.47)                                                                                                                                                                                |
| gnl UG Hs#S11046663 | 0.68 | 1 914-939(0.68)                                                                                                                                                                                |
| gnl UG Hs#S4823686  | 3.2  | 3 72-100(3.20) 537-560(1.87) 1206-1231(2.56)                                                                                                                                                   |
| gnl UG Hs#S1730664  | 0.56 | 1 309-335(0.56)                                                                                                                                                                                |
| gnl UG Hs#S3987305  | 4.04 | 4 101-126(4.04) 210-236(0.67) 476-501(0.20) 637-662(0.07)                                                                                                                                      |
| gnl UG Hs#S2294480  | 1.53 | 2 98-124(0.10) 259-284(1.53)                                                                                                                                                                   |
| gnl UG Hs#S1728536  | 0.33 | 2 487-513(0.27) 599-627(0.33)                                                                                                                                                                  |
| gnl UG Hs#S4821437  | 3.3  | 15 534-559(0.08) 890-918(0.08) 1024-1052(0.47) 1356-1381(2.98) 1463-1486(0.04) 2118-2146(0.45) 2295-2320(3.30) 2686-2710(0.14) 3123-3148(3.13) 3394-3419(1.87) 3432-3457(1.46) 3549-3574(0.07) |
| gnl UG Hs#S1726581  | 3.2  | 9 1220-1246(2.50) 1332-1357(3.20) 1655-1683(1.52) 1808-1833(0.71) 1934-1959(2.59) 2487-2510(2.30) 2846-2875(3.09) 3065-3091(1.79) 3377-3402(1.04)                                              |
| gnl UG Hs#S4436454  | 0.23 | 1 504-532(0.23)                                                                                                                                                                                |
| gnl UG Hs#S3438486  | 2.72 | 1 337-362(2.72)                                                                                                                                                                                |
| gnl UG Hs#S3438830  | 4.36 | 1 281-306(4.36)                                                                                                                                                                                |
| gnl UG Hs#S1729824  | 4.4  | 3 276-301(0.65) 608-632(0.95) 1430-1455(4.40)                                                                                                                                                  |
| gnl UG Hs#S3438762  | 0.2  | 1 663-688(0.20)                                                                                                                                                                                |
| gnl UG Hs#S2294004  | 1.13 | 2 61-86(1.13) 93-121(0.07)                                                                                                                                                                     |
| gnl UG Hs#S15632361 | 5.97 | 6 271-296(5.97) 499-524(3.04) 538-563(1.52) 932-959(1.41) 2042-2067(2.08) 2299-2325(0.76)                                                                                                      |
| gnl UG Hs#S2293549  | 3.36 | 3 789-814(0.58) 911-936(1.17) 1064-1089(3.36)                                                                                                                                                  |
| gnl UG Hs#S1728506  | 1.96 | 1 262-287(1.96)                                                                                                                                                                                |
| gnl UG Hs#S2139792  | 1.13 | 4 583-608(1.13) 682-709(0.14) 1566-1592(0.17) 2085-2109(0.72)                                                                                                                                  |
| gnl UG Hs#S3601652  | 0.08 | 1 522-547(0.08)                                                                                                                                                                                |
| gnl UG Hs#S4435810  | 3.03 | 4 1104-1129(1.50) 1162-1190(1.49) 2145-2170(3.03) 2303-2331(2.21)                                                                                                                              |
| gnl UG Hs#S2294277  | 1.72 | 2 1740-1765(0.60) 1900-1925(1.72)                                                                                                                                                              |
| gnl UG Hs#S1824392  | 5.11 | 6 63-88(5.11) 162-187(1.40) 210-235(0.91) 272-297(1.17) 517-542(0.68) 546-572(0.56)                                                                                                            |
| gnl UG Hs#S4816328  | 2.34 | 1 510-535(2.34)                                                                                                                                                                                |
| gnl UG Hs#S7111681  | 1.34 | 1 105-131(1.34)                                                                                                                                                                                |
| gnl UG Hs#S1726833  | 1.4  | 1 42-67(1.40)                                                                                                                                                                                  |
| gnl UG Hs#S1731780  | 1.83 | 2 463-491(1.07) 666-691(1.83)                                                                                                                                                                  |
| gnl UG Hs#S1727465  | 1.5  | 4 449-474(0.13) 1301-1327(0.28) 1363-1388(0.68) 1574-1598(1.50)                                                                                                                                |
| gnl UG Hs#S3219737  | 0.04 | 1 270-296(0.04)                                                                                                                                                                                |
| gnl UG Hs#S4828962  | 2.39 | 1 623-648(2.39)                                                                                                                                                                                |
| gnl UG Hs#S4842744  | 2.5  | 1 253-278(2.50)                                                                                                                                                                                |
| gnl UG Hs#S5978519  | 0.04 | 1 390-413(0.04)                                                                                                                                                                                |
| gnl UG Hs#S15115742 | 1.94 | 2 785-810(1.94) 1332-1358(0.04)                                                                                                                                                                |
| gnl UG Hs#S5931240  | 3.99 | 1 164-190(3.99)                                                                                                                                                                                |
| gnl UG Hs#S3547109  | 1.85 | 7 87-112(1.79) 452-480(0.81) 939-965(1.85) 1110-1136(0.33) 1615-1641(0.33) 1719-1745(1.21) 1823-1848(1.21)                                                                                     |
| gnl UG Hs#S2139686  | 2.76 | 3 604-630(2.76) 956-981(0.26) 1857-1880(0.21)                                                                                                                                                  |
| gnl UG Hs#S1729678  | 2.15 | 3 647-672(0.43) 3200-3226(2.15) 3255-3279(1.07)                                                                                                                                                |
| gnl UG Hs#S1731273  | 1.41 | 1 559-584(1.41)                                                                                                                                                                                |
| gnl UG Hs#S3219991  | 0.91 | 1 158-185(0.91)                                                                                                                                                                                |
| gnl UG Hs#S3219554  | 0.74 | 1 1023-1048(0.74)                                                                                                                                                                              |
| gnl UG Hs#S2293351  | 2.2  | 5 176-201(1.13) 470-495(2.20) 570-596(0.34) 1506-1531(0.50) 1972-1997(2.04)                                                                                                                    |
| gnl UG Hs#S1728568  | 2.85 | 4 250-275(0.58) 615-640(2.85) 1207-1232(0.90) 1270-1297(1.91)                                                                                                                                  |
| gnl UG Hs#S4435976  | 1.21 | 1 1121-1146(1.21)                                                                                                                                                                              |
| gnl UG Hs#S3268     | 2.72 | 3 111-136(0.32) 200-226(2.72) 338-366(0.81)                                                                                                                                                    |
| gnl UG Hs#S4435753  | 4.3  | 1 190-216(4.30)                                                                                                                                                                                |
| gnl UG Hs#S7089764  | 0.9  | 1 1123-1148(0.90)                                                                                                                                                                              |
| gnl UG Hs#S3219061  | 3.97 | 5 26-52(3.97) 187-212(0.91) 373-399(1.97) 589-614(0.13) 750-776(1.84)                                                                                                                          |
| gnl UG Hs#S4553982  | 0.75 | 1 887-913(0.75)                                                                                                                                                                                |
| gnl UG Hs#S2294383  | 0.17 | 1 917-944(0.17)                                                                                                                                                                                |
| gnl UG Hs#S14802387 | 2.5  | 1 1177-1204(2.50)                                                                                                                                                                              |
| gnl UG Hs#S4621599  | 6.19 | 4 28-53(0.72) 60-85(1.62) 156-181(6.19) 444-472(1.34)                                                                                                                                          |

|                     |      |                                                                                                                                                                              |
|---------------------|------|------------------------------------------------------------------------------------------------------------------------------------------------------------------------------|
| gnl UG Hs#S1729977  | 2.67 | 6 476-501(1.88) 730-753(2.67) 1215-1240(0.72) 1253-1278(0.14) 1973-1999(1.08) 2165-2190(0.98)                                                                                |
| gnl UG Hs#S3973039  | 1.84 | 1 440-467(1.84)                                                                                                                                                              |
| gnl UG Hs#S3219664  | 3.2  | 1 696-724(3.20)                                                                                                                                                              |
| gnl UG Hs#S1731402  | 1.66 | 1 113-142(1.66)                                                                                                                                                              |
| gnl UG Hs#S1726428  | 3.11 | 1 321-347(3.11)                                                                                                                                                              |
| gnl UG Hs#S1730347  | 2.14 | 2 1036-1061(0.57) 1232-1257(2.14)                                                                                                                                            |
| gnl UG Hs#S7111139  | 0.34 | 1 470-495(0.34)                                                                                                                                                              |
| gnl UG Hs#S2140233  | 0.97 | 2 202-230(0.97) 554-579(0.91)                                                                                                                                                |
| gnl UG Hs#S11046558 | 3.47 | 1 753-778(3.47)                                                                                                                                                              |
| gnl UG Hs#S1731840  | 1    | 2 547-572(0.46) 809-834(1.00)                                                                                                                                                |
| gnl UG Hs#S2139649  | 3.62 | 5 878-903(0.24) 1408-1433(2.46) 1847-1872(0.26) 1981-2006(3.62) 2738-2762(2.29)                                                                                              |
| gnl UG Hs#S3619289  | 1.27 | 1 528-554(1.27)                                                                                                                                                              |
| gnl UG Hs#S3619678  | 3.11 | 11 332-360(1.30) 598-623(3.11) 825-850(0.30) 1039-1064(0.92) 1136-1161(0.33) 1566-1591(1.11) 2558-2583(2.62) 2902-2927(2.26) 2982-3008(2.69) 3020-3045(3.11) 3423-3449(0.13) |
| gnl UG Hs#S2138823  | 3.4  | 5 212-237(1.84) 1172-1198(0.69) 1371-1396(2.30) 1513-1540(3.40) 1618-1642(0.67)                                                                                              |
| gnl UG Hs#S1727669  | 1.72 | 1 250-275(1.72)                                                                                                                                                              |
| gnl UG Hs#S1727678  | 1.95 | 2 561-586(0.85) 1277-1303(1.95)                                                                                                                                              |
| gnl UG Hs#S3219903  | 0.11 | 1 826-852(0.11)                                                                                                                                                              |
| gnl UG Hs#S1731167  | 0.08 | 1 562-587(0.08)                                                                                                                                                              |
| gnl UG Hs#S2139487  | 2.29 | 2 74-103(2.29) 558-583(0.40)                                                                                                                                                 |
| gnl UG Hs#S5978654  | 0.24 | 1 285-311(0.24)                                                                                                                                                              |
| gnl UG Hs#S1729198  | 5.17 | 3 386-412(3.05) 1100-1128(1.45) 1297-1323(5.17)                                                                                                                              |
| gnl UG Hs#S1729438  | 1.53 | 2 89-114(1.53) 196-222(0.12)                                                                                                                                                 |
| gnl UG Hs#S1729287  | 1.02 | 1 99-127(1.02)                                                                                                                                                               |
| gnl UG Hs#S3814607  | 2.5  | 1 493-518(2.50)                                                                                                                                                              |
| gnl UG Hs#S3814695  | 2.08 | 2 195-220(1.62) 271-299(2.08)                                                                                                                                                |
| gnl UG Hs#S2139162  | 1.07 | 1 1739-1765(1.07)                                                                                                                                                            |
| gnl UG Hs#S3547122  | 2.1  | 3 157-182(0.21) 1725-1751(2.10) 2097-2123(0.17)                                                                                                                              |
| gnl UG Hs#S3603164  | 3.4  | 1 357-382(3.40)                                                                                                                                                              |
| gnl UG Hs#S2293468  | 0.3  | 1 552-577(0.30)                                                                                                                                                              |
| gnl UG Hs#S4807740  | 3.52 | 2 236-263(3.52) 931-958(0.23)                                                                                                                                                |
| gnl UG Hs#S1731295  | 0.69 | 1 694-720(0.69)                                                                                                                                                              |
| gnl UG Hs#S4823511  | 2.4  | 1 94-119(2.40)                                                                                                                                                               |
| gnl UG Hs#S15636406 | 4.62 | 5 143-169(4.12) 1005-1028(4.11) 1071-1098(0.69) 1288-1313(4.62) 1572-1599(0.32)                                                                                              |
| gnl UG Hs#S4822731  | 3.89 | 3 126-151(3.89) 226-249(1.01) 448-475(1.83)                                                                                                                                  |
| gnl UG Hs#S3218980  | 0.51 | 2 651-677(0.30) 775-801(0.51)                                                                                                                                                |
| gnl UG Hs#S3438377  | 0.84 | 2 1437-1462(0.46) 1715-1746(0.84)                                                                                                                                            |
| gnl UG Hs#S2293885  | 1.65 | 1 657-682(1.65)                                                                                                                                                              |
| gnl UG Hs#S15631946 | 0.89 | 1 218-241(0.89)                                                                                                                                                              |
| gnl UG Hs#S2139834  | 1.66 | 2 605-631(1.66) 667-693(0.50)                                                                                                                                                |
| gnl UG Hs#S1367569  | 1.75 | 1 901-927(1.75)                                                                                                                                                              |
| gnl UG Hs#S4820119  | 1.49 | 1 629-657(1.49)                                                                                                                                                              |
| gnl UG Hs#S4620958  | 0.88 | 1 1729-1756(0.88)                                                                                                                                                            |
| gnl UG Hs#S3438817  | 1.88 | 3 398-426(0.49) 443-466(0.24) 721-749(1.88)                                                                                                                                  |
| gnl UG Hs#S3603845  | 1.23 | 1 672-697(1.23)                                                                                                                                                              |
| gnl UG Hs#S4813130  | 0.48 | 1 5-30(0.48)                                                                                                                                                                 |
| gnl UG Hs#S3814598  | 1.72 | 3 237-263(1.39) 374-399(0.11) 701-728(1.72)                                                                                                                                  |
| gnl UG Hs#S4811429  | 4.72 | 1 2229-2254(4.72)                                                                                                                                                            |
| gnl UG Hs#S2140358  | 0.26 | 1 979-1005(0.26)                                                                                                                                                             |
| gnl UG Hs#S3219490  | 2.76 | 2 1374-1397(0.89) 1707-1732(2.76)                                                                                                                                            |
| gnl UG Hs#S2293461  | 1.07 | 1 377-405(1.07)                                                                                                                                                              |
| gnl UG Hs#S4435132  | 4.21 | 2 400-425(4.21) 458-483(4.21)                                                                                                                                                |
| gnl UG Hs#S4824331  | 2.13 | 3 200-226(0.72) 473-497(2.13) 1299-1324(1.53)                                                                                                                                |
| gnl UG Hs#S15634065 | 1.04 | 1 463-488(1.04)                                                                                                                                                              |
| gnl UG Hs#S4001877  | 0.18 | 1 408-433(0.18)                                                                                                                                                              |

|                     |      |                                                                                                                           |
|---------------------|------|---------------------------------------------------------------------------------------------------------------------------|
| gnl UG Hs#S4545994  | 2.07 | 2 539-564(2.07) 1132-1160(1.09)                                                                                           |
| gnl UG Hs#S3219486  | 1.01 | 1 72-98(1.01)                                                                                                             |
| gnl UG Hs#S4809640  | 3.26 | 1 3248-3273(3.26)                                                                                                         |
| gnl UG Hs#S1727923  | 5.78 | 3 345-370(5.78) 789-814(2.53) 839-865(1.76)                                                                               |
| gnl UG Hs#S1729777  | 2.66 | 2 82-108(0.10) 203-227(2.66)                                                                                              |
| gnl UG Hs#S4621097  | 2.84 | 8 45-71(1.86) 547-573(0.72) 589-615(1.40) 738-764(2.84) 947-975(0.40) 2021-2049(0.81) 2273-2299(1.40) 2441-2469(0.04)     |
| gnl UG Hs#S4820013  | 0.72 | 2 710-735(0.72) 783-808(0.04)                                                                                             |
| gnl UG Hs#S4812509  | 3.72 | 6 289-314(3.72) 1546-1571(0.91) 1694-1720(2.39) 1906-1931(0.87) 2129-2154(2.67) 3598-3623(1.56)                           |
| gnl UG Hs#S1728497  | 0.34 | 2 1065-1091(0.34) 2936-2964(0.01)                                                                                         |
| gnl UG Hs#S1731570  | 3.08 | 6 589-614(0.91) 1262-1288(3.08) 1425-1451(0.98) 1580-1605(1.34) 1995-2020(2.56) 2021-2048(2.59)                           |
| gnl UG Hs#S4828112  | 0.52 | 1 1003-1028(0.52)                                                                                                         |
| gnl UG Hs#S5978432  | 4.17 | 2 759-784(4.17) 1138-1165(0.47)                                                                                           |
| gnl UG Hs#S1732117  | 1.23 | 1 25-51(1.23)                                                                                                             |
| gnl UG Hs#S4545949  | 1.88 | 4 392-420(1.88) 1316-1341(0.68) 1356-1381(0.21) 1395-1419(1.08)                                                           |
| gnl UG Hs#S3438784  | 5.26 | 2 212-240(4.53) 903-928(5.26)                                                                                             |
| gnl UG Hs#S4044897  | 1.62 | 2 627-652(1.62) 748-774(0.91)                                                                                             |
| gnl UG Hs#S2293329  | 3.63 | 2 136-161(3.63) 206-231(0.30)                                                                                             |
| gnl UG Hs#S4824007  | 1.14 | 8 276-302(0.76) 371-396(0.08) 918-944(0.08) 949-974(1.11) 1011-1039(1.14) 2111-2136(0.36) 2137-2162(1.02) 2169-2194(0.72) |
| gnl UG Hs#S1730090  | 0.33 | 1 709-734(0.33)                                                                                                           |
| gnl UG Hs#S2294640  | 3.71 | 5 92-120(0.87) 526-551(3.71) 1025-1051(3.04) 1106-1135(1.52) 1582-1609(2.88)                                              |
| gnl UG Hs#S1729312  | 2.04 | 1 3402-3426(2.04)                                                                                                         |
| gnl UG Hs#S4044522  | 1.1  | 2 6-31(1.10) 1631-1656(0.50)                                                                                              |
| gnl UG Hs#S5978441  | 1.66 | 2 100-128(1.66) 179-207(0.20)                                                                                             |
| gnl UG Hs#S4816249  | 1.38 | 3 105-131(0.06) 293-318(0.04) 700-726(1.38)                                                                               |
| gnl UG Hs#S4283388  | 2.3  | 1 481-506(2.30)                                                                                                           |
| gnl UG Hs#S3219151  | 0.31 | 1 425-450(0.31)                                                                                                           |
| gnl UG Hs#S1726998  | 0.27 | 1 136-160(0.27)                                                                                                           |
| gnl UG Hs#S15633111 | 1.76 | 2 490-515(0.72) 762-788(1.76)                                                                                             |
| gnl UG Hs#S1732194  | 0.47 | 1 137-162(0.47)                                                                                                           |
| gnl UG Hs#S14272721 | 0.49 | 1 487-510(0.49)                                                                                                           |
| gnl UG Hs#S2140070  | 0.45 | 1 139-167(0.45)                                                                                                           |
| gnl UG Hs#S1263813  | 0.56 | 2 779-805(0.27) 970-995(0.56)                                                                                             |
| gnl UG Hs#S3439109  | 0.34 | 1 166-191(0.34)                                                                                                           |
| gnl UG Hs#S2293285  | 2.4  | 1 624-652(2.40)                                                                                                           |
| gnl UG Hs#S1730897  | 3.04 | 1 1713-1738(3.04)                                                                                                         |
| gnl UG Hs#S3619343  | 0.2  | 1 91-118(0.20)                                                                                                            |
| gnl UG Hs#S3218975  | 5.39 | 1 1695-1722(5.39)                                                                                                         |
| gnl UG Hs#S15632263 | 1.91 | 1 2501-2529(1.91)                                                                                                         |
| gnl UG Hs#S15636745 | 1.08 | 1 823-848(1.08)                                                                                                           |
| gnl UG Hs#S4807712  | 1.33 | 1 1483-1508(1.33)                                                                                                         |
| gnl UG Hs#S2140636  | 0.67 | 1 949-975(0.67)                                                                                                           |
| gnl UG Hs#S3546998  | 0.71 | 1 41-69(0.71)                                                                                                             |
| gnl UG Hs#S2138777  | 2.65 | 1 112-140(2.65)                                                                                                           |
| gnl UG Hs#S1726424  | 0.75 | 2 911-936(0.67) 949-974(0.75)                                                                                             |
| gnl UG Hs#S1732400  | 1.62 | 3 462-490(0.08) 676-702(1.62) 748-773(0.55)                                                                               |
| gnl UG Hs#S3940800  | 5.58 | 1 549-574(5.58)                                                                                                           |
| gnl UG Hs#S2138717  | 0.21 | 1 441-464(0.21)                                                                                                           |
| gnl UG Hs#S11046675 | 2.98 | 2 29-54(2.98) 88-113(0.65)                                                                                                |
| gnl UG Hs#S4825991  | 3.37 | 4 429-454(0.04) 1121-1146(2.52) 1321-1347(3.37) 1409-1435(0.34)                                                           |
| gnl UG Hs#S3619507  | 1.34 | 2 497-523(1.34) 566-593(0.43)                                                                                             |
| gnl UG Hs#S11046698 | 1.18 | 1 477-502(1.18)                                                                                                           |
| gnl UG Hs#S7112142  | 1.5  | 2 532-558(1.10) 1380-1405(1.50)                                                                                           |
| gnl UG Hs#S3437930  | 5.3  | 2 185-211(5.30) 318-344(4.72)                                                                                             |
| gnl UG Hs#S1726314  | 0.94 | 1 1213-1238(0.94)                                                                                                         |

|                     |      |    |                                                                                                                                                                                 |
|---------------------|------|----|---------------------------------------------------------------------------------------------------------------------------------------------------------------------------------|
| gnl UG Hs#S4806455  | 4    | 4  | 1021-1046(2.26) 2061-2085(4.00) 2110-2135(3.89) 2188-2213(2.76)                                                                                                                 |
| gnl UG Hs#S14812827 | 1.98 | 8  | 54-79(0.72) 355-380(0.15) 555-580(1.98) 1012-1038(0.67) 1308-1333(0.40) 1575-1598(1.59) 1718-1744(0.50) 1857-1883(1.91)                                                         |
| gnl UG Hs#S2162     | 0.76 | 1  | 333-359(0.76)                                                                                                                                                                   |
| gnl UG Hs#S4284973  | 0.14 | 2  | 746-774(0.08) 1286-1311(0.14)                                                                                                                                                   |
| gnl UG Hs#S1726788  | 3.56 | 2  | 232-257(0.40) 422-447(3.56)                                                                                                                                                     |
| gnl UG Hs#S14863726 | 0.33 | 1  | 321-346(0.33)                                                                                                                                                                   |
| gnl UG Hs#S4807945  | 1.82 | 1  | 343-370(1.82)                                                                                                                                                                   |
| gnl UG Hs#S3218943  | 0.49 | 2  | 685-708(0.49) 839-863(0.10)                                                                                                                                                     |
| gnl UG Hs#S1824273  | 2.62 | 2  | 253-277(2.62) 208-236(0.23)                                                                                                                                                     |
| gnl UG Hs#S3219289  | 4.88 | 3  | 27-53(0.44) 233-261(4.88) 976-1001(0.89)                                                                                                                                        |
| gnl UG Hs#S1731370  | 0.88 | 1  | 343-370(0.88)                                                                                                                                                                   |
| gnl UG Hs#S6163436  | 3.33 | 2  | 210-235(3.33) 611-637(2.12)                                                                                                                                                     |
| gnl UG Hs#S1729768  | 1.3  | 4  | 52-78(0.50) 106-134(1.18) 236-262(0.15) 707-733(1.30)                                                                                                                           |
| gnl UG Hs#S3973061  | 0.07 | 1  | 533-558(0.07)                                                                                                                                                                   |
| gnl UG Hs#S3619171  | 1.93 | 2  | 64-89(0.46) 145-170(1.93)                                                                                                                                                       |
| gnl UG Hs#S3880668  | 2.5  | 2  | 590-616(2.50) 752-777(0.40)                                                                                                                                                     |
| gnl UG Hs#S4807819  | 0.22 | 1  | 525-549(0.22)                                                                                                                                                                   |
| gnl UG Hs#S2140556  | 0.53 | 1  | 144-169(0.53)                                                                                                                                                                   |
| gnl UG Hs#S1729180  | 3.6  | 2  | 425-450(1.87) 1298-1324(3.60)                                                                                                                                                   |
| gnl UG Hs#S15637971 | 1.4  | 2  | 228-258(0.52) 761-789(1.40)                                                                                                                                                     |
| gnl UG Hs#S1730089  | 0.81 | 1  | 310-338(0.81)                                                                                                                                                                   |
| gnl UG Hs#S2140450  | 2.65 | 4  | 57-82(2.65) 749-775(1.23) 1072-1099(2.01) 1367-1395(0.66)                                                                                                                       |
| gnl UG Hs#S1726775  | 0.58 | 1  | 627-652(0.58)                                                                                                                                                                   |
| gnl UG Hs#S2294417  | 0.82 | 1  | 89-114(0.82)                                                                                                                                                                    |
| gnl UG Hs#S1732347  | 0.26 | 1  | 1230-1254(0.26)                                                                                                                                                                 |
| gnl UG Hs#S10832699 | 1.17 | 2  | 832-858(1.17) 1920-1946(0.69)                                                                                                                                                   |
| gnl UG Hs#S1728605  | 4.72 | 1  | 341-366(4.72)                                                                                                                                                                   |
| gnl UG Hs#S2139498  | 3.2  | 4  | 718-743(3.20) 1506-1531(1.11) 1534-1557(1.26) 2608-2632(0.48)                                                                                                                   |
| gnl UG Hs#S1727434  | 3.13 | 7  | 227-252(1.43) 402-427(1.14) 483-508(3.13) 1104-1130(0.10) 1653-1679(1.04) 2043-2070(0.51) 2228-2253(2.49)                                                                       |
| gnl UG Hs#S3219617  | 0.46 | 1  | 1701-1726(0.46)                                                                                                                                                                 |
| gnl UG Hs#S5978425  | 1.03 | 3  | 368-393(1.03) 413-438(0.43) 1001-1029(0.91)                                                                                                                                     |
| gnl UG Hs#S2139503  | 2.36 | 5  | 1003-1028(1.01) 2404-2429(2.36) 2630-2655(1.30) 3195-3219(0.82) 3389-3418(0.35)                                                                                                 |
| gnl UG Hs#S3619199  | 3.57 | 4  | 130-156(1.76) 218-243(0.07) 515-540(3.57) 1227-1253(0.24)                                                                                                                       |
| gnl UG Hs#S4807632  | 1.69 | 1  | 129-154(1.69)                                                                                                                                                                   |
| gnl UG Hs#S2293627  | 3.73 | 3  | 120-145(0.65) 229-255(3.73) 647-672(0.62)                                                                                                                                       |
| gnl UG Hs#S1729267  | 1.59 | 1  | 809-837(1.59)                                                                                                                                                                   |
| gnl UG Hs#S1727567  | 2.3  | 2  | 246-271(2.30) 306-331(0.91)                                                                                                                                                     |
| gnl UG Hs#S4553772  | 0.43 | 1  | 496-523(0.43)                                                                                                                                                                   |
| gnl UG Hs#S1824540  | 2.36 | 2  | 77-102(2.36) 239-264(2.24)                                                                                                                                                      |
| gnl UG Hs#S1824535  | 0.81 | 1  | 1660-1685(0.81)                                                                                                                                                                 |
| gnl UG Hs#S15631499 | 0.13 | 1  | 1040-1066(0.13)                                                                                                                                                                 |
| gnl UG Hs#S3218992  | 2.23 | 11 | 1068-1093(0.58) 2041-2066(0.30) 2280-2306(1.08) 2685-2711(2.23) 3144-3169(0.61) 3228-3254(1.44) 6041-6069(0.49) 6362-6387(0.84) 6818-6843(0.65) 6920-6946(0.98) 7047-7073(1.50) |
| gnl UG Hs#S7112131  | 0.39 | 2  | 407-433(0.34) 856-883(0.39)                                                                                                                                                     |
| gnl UG Hs#S4836468  | 2.63 | 1  | 1306-1331(2.63)                                                                                                                                                                 |
| gnl UG Hs#S1728660  | 2.72 | 2  | 130-158(2.72) 200-226(0.36)                                                                                                                                                     |
| gnl UG Hs#S15636025 | 0.82 | 3  | 1126-1152(0.82) 1727-1753(0.04) 1859-1884(0.72)                                                                                                                                 |
| gnl UG Hs#S3439011  | 2.2  | 2  | 1467-1495(2.20) 1502-1527(0.59)                                                                                                                                                 |
| gnl UG Hs#S1824499  | 0.04 | 1  | 67-92(0.04)                                                                                                                                                                     |
| gnl UG Hs#S4621229  | 0.87 | 1  | 259-287(0.87)                                                                                                                                                                   |
| gnl UG Hs#S2138713  | 0.23 | 1  | 285-311(0.23)                                                                                                                                                                   |
| gnl UG Hs#S2140123  | 2.04 | 1  | 478-503(2.04)                                                                                                                                                                   |
| gnl UG Hs#S1730120  | 2.04 | 2  | 443-468(0.87) 840-866(2.04)                                                                                                                                                     |
| gnl UG Hs#S2140463  | 1.4  | 1  | 541-566(1.40)                                                                                                                                                                   |
| gnl UG Hs#S3438531  | 0.91 | 1  | 86-112(0.91)                                                                                                                                                                    |

|                     |      |   |                 |                                                                                 |
|---------------------|------|---|-----------------|---------------------------------------------------------------------------------|
| gnl UG Hs#S2140075  | 3.57 | 2 | 123-148(3.57)   | 361-386(0.30)                                                                   |
| gnl UG Hs#S1728964  | 2.08 | 1 | 100-125(2.08)   |                                                                                 |
| gnl UG Hs#S1728195  | 2.75 | 1 | 136-161(2.75)   |                                                                                 |
| gnl UG Hs#S4810140  | 0.07 | 2 | 575-602(0.07)   | 925-953(0.04)                                                                   |
| gnl UG Hs#S15638846 | 0.4  | 1 | 550-575(0.40)   |                                                                                 |
| gnl UG Hs#S1730616  | 0.49 | 1 | 800-825(0.49)   |                                                                                 |
| gnl UG Hs#S2293636  | 1.87 | 1 | 130-155(1.87)   |                                                                                 |
| gnl UG Hs#S15635832 | 7.72 | 1 | 359-385(7.72)   |                                                                                 |
| gnl UG Hs#S5978638  | 2.47 | 2 | 146-171(0.13)   | 220-245(2.47)                                                                   |
| gnl UG Hs#S7110862  | 2.62 | 3 | 752-777(0.07)   | 1885-1910(1.11) 2040-2065(2.62)                                                 |
| gnl UG Hs#S1727428  | 1.01 | 4 | 115-141(0.12)   | 470-495(0.15) 1533-1559(0.60) 1634-1663(1.01)                                   |
| gnl UG Hs#S1728412  | 2.82 | 1 | 148-173(2.82)   |                                                                                 |
| gnl UG Hs#S4612641  | 1.3  | 1 | 403-428(1.30)   |                                                                                 |
| gnl UG Hs#S7110598  | 1.75 | 2 | 330-357(0.74)   | 434-460(1.75)                                                                   |
| gnl UG Hs#S4615834  | 0.23 | 1 | 1968-1994(0.23) |                                                                                 |
| gnl UG Hs#S3355479  | 0.27 | 1 | 314-340(0.27)   |                                                                                 |
| gnl UG Hs#S2140121  | 3.04 | 2 | 542-567(3.04)   | 1180-1208(0.16)                                                                 |
| gnl UG Hs#S5931218  | 0.88 | 1 | 579-607(0.88)   |                                                                                 |
| gnl UG Hs#S3355579  | 0.72 | 1 | 1739-1764(0.72) |                                                                                 |
| gnl UG Hs#S2139382  | 1.72 | 1 | 1308-1333(1.72) |                                                                                 |
| gnl UG Hs#S1729871  | 1.72 | 4 | 255-280(1.72)   | 317-345(0.40) 481-506(1.63) 2329-2354(0.98)                                     |
| gnl UG Hs#S1728291  | 5.47 | 3 | 20-43(0.24)     | 816-842(0.47) 1700-1725(5.47)                                                   |
| gnl UG Hs#S2293419  | 0.46 | 1 | 243-268(0.46)   |                                                                                 |
| gnl UG Hs#S1727890  | 0.43 | 1 | 184-211(0.43)   |                                                                                 |
| gnl UG Hs#S1730487  | 1.46 | 1 | 279-305(1.46)   |                                                                                 |
| gnl UG Hs#S3601496  | 2.62 | 3 | 90-115(2.62)    | 272-298(0.04) 898-926(2.16)                                                     |
| gnl UG Hs#S14273034 | 0.39 | 1 | 89-114(0.39)    |                                                                                 |
| gnl UG Hs#S1731587  | 1.26 | 2 | 104-129(1.26)   | 241-264(0.21)                                                                   |
| gnl UG Hs#S4619575  | 1.98 | 2 | 887-914(0.26)   | 996-1022(1.98)                                                                  |
| gnl UG Hs#S1731123  | 3.08 | 2 | 980-1006(3.08)  | 1829-1854(1.82)                                                                 |
| gnl UG Hs#S4553535  | 2.89 | 4 | 918-941(0.68)   | 1255-1283(1.03) 1553-1578(2.89) 1770-1793(0.52)                                 |
| gnl UG Hs#S4436325  | 4.17 | 2 | 174-200(4.17)   | 646-671(0.33)                                                                   |
| gnl UG Hs#S3993276  | 0.72 | 1 | 184-209(0.72)   |                                                                                 |
| gnl UG Hs#S3439813  | 1.2  | 2 | 1130-1156(0.78) | 1187-1215(1.20)                                                                 |
| gnl UG Hs#S1727482  | 2.13 | 3 | 144-169(0.45)   | 229-255(1.57) 276-304(2.13)                                                     |
| gnl UG Hs#S4815925  | 0.49 | 3 | 2121-2147(0.10) | 5559-5583(0.15) 5632-5660(0.49)                                                 |
| gnl UG Hs#S1727784  | 1.18 | 1 | 145-173(1.18)   |                                                                                 |
| gnl UG Hs#S3973022  | 0.85 | 1 | 395-419(0.85)   |                                                                                 |
| gnl UG Hs#S1729706  | 1.68 | 2 | 79-104(1.68)    | 452-477(0.79)                                                                   |
| gnl UG Hs#S6693370  | 1.5  | 2 | 175-201(0.67)   | 210-235(1.50)                                                                   |
| gnl UG Hs#S1729567  | 2.62 | 4 | 120-143(2.62)   | 307-331(0.71) 427-452(0.39) 581-607(0.91)                                       |
| gnl UG Hs#S1731946  | 1.4  | 1 | 234-259(1.40)   |                                                                                 |
| gnl UG Hs#S4284773  | 0.98 | 1 | 62-87(0.98)     |                                                                                 |
| gnl UG Hs#S2139398  | 1.2  | 1 | 873-898(1.20)   |                                                                                 |
| gnl UG Hs#S4436176  | 3.55 | 1 | 170-196(3.55)   |                                                                                 |
| gnl UG Hs#S6683080  | 2.13 | 2 | 837-862(0.97)   | 1736-1761(2.13)                                                                 |
| gnl UG Hs#S2293166  | 0.72 | 1 | 454-479(0.72)   |                                                                                 |
| gnl UG Hs#S1729695  | 0.27 | 1 | 486-512(0.27)   |                                                                                 |
| gnl UG Hs#S1732167  | 0.75 | 1 | 185-210(0.75)   |                                                                                 |
| gnl UG Hs#S4284754  | 4.79 | 1 | 97-122(4.79)    |                                                                                 |
| gnl UG Hs#S7110363  | 0.81 | 2 | 256-280(0.81)   | 352-377(0.81)                                                                   |
| gnl UG Hs#S2140351  | 2.29 | 6 | 606-632(0.59)   | 1009-1037(2.07) 1266-1291(0.85) 1992-2017(2.29) 2133-2156(0.97) 2809-2837(1.55) |
| gnl UG Hs#S3993863  | 0.78 | 2 | 1102-1127(0.78) | 1609-1632(0.30)                                                                 |
| gnl UG Hs#S816267   | 3.72 | 3 | 347-372(0.58)   | 1030-1055(1.17) 1468-1493(3.72)                                                 |

|                    |      |                                                                                                           |
|--------------------|------|-----------------------------------------------------------------------------------------------------------|
| gn UG Hs#S1728014  | 2.16 | 1 796-822(2.16)                                                                                           |
| gn UG Hs#S4612693  | 0.1  | 2 423-449(0.10) 759-785(0.10)                                                                             |
| gn UG Hs#S15631501 | 1.13 | 1 732-757(1.13)                                                                                           |
| gn UG Hs#S1727359  | 0.63 | 1 1371-1396(0.63)                                                                                         |
| gn UG Hs#S15641548 | 1.97 | 2 1623-1650(1.54) 1677-1701(1.97)                                                                         |
| gn UG Hs#S2293651  | 1.08 | 3 1723-1750(0.48) 1999-2024(1.08) 2266-2294(0.14)                                                         |
| gn UG Hs#S3601762  | 2.91 | 2 781-807(2.91) 1360-1385(1.71)                                                                           |
| gn UG Hs#S1726921  | 1.91 | 1 256-283(1.91)                                                                                           |
| gn UG Hs#S4546114  | 0.82 | 2 400-425(0.20) 1817-1843(0.82)                                                                           |
| gn UG Hs#S12743827 | 4.16 | 3 495-521(0.94) 703-728(1.05) 970-995(4.16)                                                               |
| gn UG Hs#S1728272  | 4.45 | 7 138-163(4.45) 269-293(0.90) 577-602(1.30) 755-780(1.72) 1002-1027(0.14) 1784-1809(0.91) 2010-2038(0.48) |
| gn UG Hs#S3987605  | 2.84 | 1 80-106(2.84)                                                                                            |
| gn UG Hs#S1730646  | 0.43 | 1 1064-1089(0.43)                                                                                         |
| gn UG Hs#S1731535  | 0.57 | 1 130-155(0.57)                                                                                           |
| gn UG Hs#S14802256 | 2.31 | 1 157-182(2.31)                                                                                           |
| gn UG Hs#S3601538  | 2.13 | 2 152-177(0.91) 732-757(2.13)                                                                             |
| gn UG Hs#S4046411  | 2.62 | 4 941-967(0.45) 1094-1120(1.50) 1169-1194(2.62) 1450-1476(0.59)                                           |
| gn UG Hs#S4807905  | 3.33 | 1 616-641(3.33)                                                                                           |
| gn UG Hs#S1726595  | 3.47 | 3 581-607(1.68) 934-960(2.89) 1156-1184(3.47)                                                             |





-2195(0.26) 2238-2264(6.14)

















) 5420-5445(0.30) 5583-5608(0.01) 6054-6077(1.21)







4(0.20) 8512-8540(2.07) 9210-9235(1.89) 9456-9484(1.08)

































4) 2529-2555(2.25)



) 4963-4989(3.03) 5878-5904(2.30) 6404-6429(1.62) 6576-6601(5.23)









3) 4731-4756(2.04)

3570-3595(0.55) 3640-3665(1.40) 3836-3862(2.75) 4170-4195(0.79)

























1(0.85)















153(0.36) 3872-3897(1.16)



324-3350(3.40) 3774-3800(1.37) 4668-4693(0.40)





3558-3586(3.08) 3592-3618(1.76) 4163-4191(0.30)









.27) 4544-4572(0.86) 4598-4623(0.50)























































) 2301-2327(0.17) 2335-2360(0.55) 2370-2395(2.04) 2579-2604(0.07)



















09-2734(1.30) 2799-2824(1.98) 3533-3559(2.08)

9(1.79) 4911-4937(0.07) 5314-5339(2.04) 5361-5389(3.20)



















































2.84) 5566-5594(0.01)





























-3562(2.13) 3757-3782(0.46) 4058-4083(1.72) 4470-4495(1.82) 4556-4581(2.53) 4683-4708(1.89)





























.05) 3702-3730(1.04) 3941-3969(0.38) 4109-4135(0.72)
